# Supplementary material for: Deep profiling and custom databases improve detection of proteoforms generated by alternative splicing
Source: HighWire-hosted journal article supplement (doi:10.1101/gr.248435.119), 2019-11-14
Supplement: Supplemental_Material_Summary.docx [file Supplemental_Material_Summary.docx]

1. **List of Supplemental Tables**

| **Supplemental**  **Table** | **Description** |
| --- | --- |
| **S1** | Reverse phase high-pH fractionation of tryptic peptides |
| **S2** | Database search summary and detailed Proteome Discoverer parameters for data-dependent acquisition (DDA) analysis |
| **S3** | Preset data-independent acquisition (DIA) *m/z* fragmentation windows |
| **S4** | Peptide quantification by DDA and DIA |
| **S5** | Protein quantification by DDA and DIA |
| **S6** | List of proteins by sub-cellular compartment |
| **S7** | List of identified proteoforms (protein and peptide) |
| **S8** | Gene-specific primer sequences for RT-PCR and annealing temperatures |

1. **List of Supplemental Figures**

| **Supplemental Figure** | **Description** |
| --- | --- |
| **S1** | Visualization of local splice variations (LSVs) |
| **S2** | Schematic workflow for generating custom database based on RNA-seq data |
| **S3** | Validation of peptide high-pH fractionation |
| **S4** | Heatmap of high-pH peptide fractionation samples showing high reproducibility by co-clustering of samples based on high-pH and sub-cellular fractions |
| **S5** | Protein gene set enrichment analysis (GSEA) enrichment plots for the top 6 Gene Ontology (GO) categories in unstimulated and stimulated T cell conditions |
| **S6** | MS2 fragmentation spectra for PKM1/2 exon junction peptides (EJPs) |
| **S7** | MS2 fragmentation spectra for LEF1 isoform exon junction peptides (EJPs) |

1. **In-house R script to generate 3-frame translation databases using SeqinR package (**<https://doi.org/10.1007/978-3-540-35306-5_10>)
