# Supplementary material for: Deep profiling and custom databases improve detection of proteoforms generated by alternative splicing
Source: HighWire-hosted journal article supplement (doi:10.1101/gr.248435.119), 2019-11-14
Supplement: Supplemental_Table_S4.xlsx [file Supplemental_Table_S4.xlsx]

## Sheet: DDA combined protein quant
Supplemental Table S4: Protein quantification by DDA-MS
								CYTOPLASMIC FRACTIONS									NUCLEAR FRACTIONS
Search files/database	Protein FDR Confidence: Combined	SWISS-PROT Accession	custom database Accession	Description	Ensembl ID	Gene Symbol	Exp. q-value: Combined	unstim_cyto (average)	stim_cyto (average)	unstim_cyto (stdev)	stim_cyto (stdev)	p.value	adjusted p.value	log2 FC_cyto (S/U)	p.value (imputed MVs)	FC adjusted p.value	unstim_nuc (average)	stim_nuc (average)	unstim_nuc (stdev)	stim_nuc (stdev)	p.value	adjusted p.value	log2 FC_nuc (S/U)	p.value (imputed MVs)	FC adjusted p.value		Legend/notes:
+pH fractionation/SP	High	A0A0B4J237		T cell receptor alpha variable 8-2 OS=Homo sapiens OX=9606 GN=TRAV8-2 PE=3 SV=1	ENSG00000211786	TRAV8-2	0.004	-3.90089	-0.868558	0.616246	0.206468	0.00127392	0.0584969	3.03233	0.00127392	0.0580176	-1.65029		1.08514	N.D.	N.D.	NA	-4.83747	0.00153607	0.122958		Search files/database: used SwissProt search of +pH peptide fractionation files as reference and added additional proteins to the list which were identified by searching the -pH peptide fractionation files and/or MAJIQ or RefSeq databases
+pH fractionation/SP	High	A0AVT1		Ubiquitin-like modifier-activating enzyme 6 OS=Homo sapiens OX=9606 GN=UBA6 PE=1 SV=1	ENSG00000033178	UBA6	0	3.6349	3.44984	0.377432	0.393236	0.58808	0.774518	-0.185062	0.58808	0.771733	2.1255	2.34448	0.844206	0.384348	0.703561	0.911914	0.21898	0.703561	0.918853		Protein FDR Confidence: FDR was set to 1%, the Sequest results were filtered only for high confidence identifications (and by at least quantification in two replicates of any given sample)
+pH fractionation/SP	High	A0FGR8-2		Isoform 2 of Extended synaptotagmin-2 OS=Homo sapiens OX=9606 GN=ESYT2	ENSG00000117868	ESYT2	0	2.37388	3.25022	0.487467	0.224466	0.0474266	0.223026	0.876331	0.0474266	0.232726	1.57679	2.0449	0.215817	0.0829306	0.024743	0.320984	0.468106	0.024743	0.330873		SwissProt Accession: a) from SwissProt databse searches, these are the actual protein accessions that Sequest references; b) for MAJIQ and RefSeq: some of them have SwissProt accessions, but these were annotated after the searches were done and not all genes were matched to their UniProt canonical accession
+pH fractionation/SP	High	A0FGR8-6		Isoform 6 of Extended synaptotagmin-2 OS=Homo sapiens OX=9606 GN=ESYT2		ESYT2	0		-2.86113	N.D.	1.21696	N.D.	NA	2.38336	0.107387	0.347094	-5.57562	-3.51893	N.D.	N.D.	N.D.	NA	0.718711	0.545866	0.857139		custom database Accession: designated protein accessions for our custom databases. For MAJIQ, "0,1,2" indicate the reading frame, whereas "L" and "S" represent the farthest or closes junction for a given LSV, respectively. The farthest junction is considered as cassette exon skipping, whereas the closest junction is considered as cassette exon inclusion.
+pH fractionation/SP	High	A0MZ66-3		Isoform 3 of Shootin-1 OS=Homo sapiens OX=9606 GN=SHTN1		KIAA1598; SHTN1	0	-0.640321	-1.65097	0.29526	0.257508	0.0110908	0.125993	-1.01065	0.0110908	0.126002	-3.40226	-2.60318	1.55653	0.955071	0.490709	0.833937	0.79909	0.490709	0.834629		Description: gene description
+pH fractionation/SP	High	A1L0T0		Acetolactate synthase-like protein OS=Homo sapiens OX=9606 GN=ILVBL PE=1 SV=2	ENSG00000105135	ILVBL	0	-0.774987	-0.688937	0.219927	0.47061	0.788423	0.89353	0.0860505	0.788423	0.891662	-3.12005	-1.77709	0.65916	0.668902	0.0684375	0.460647	1.34296	0.0684375	0.467905		Ensembl ID: Ensembl accession for each gene (when available).
+pH fractionation/SP	High	A1X283		SH3 and PX domain-containing protein 2B OS=Homo sapiens OX=9606 GN=SH3PXD2B PE=1 SV=3	ENSG00000174705	SH3PXD2B	0	-2.49911	-2.01848	0.553445	0.877673	0.467327	0.697071	0.480637	0.467327	0.691941	-4.42514	-3.57419	1.65104	0.325289	0.430546	0.806357	0.850956	0.430546	0.812489		Gene Symbol
+pH fractionation/SP	High	A2AJT9		BCLAF1 and THRAP3 family member 3 OS=Homo sapiens OX=9606 GN=BCLAF3 PE=1 SV=1	ENSG00000173681	CXorf23; BCLAF3	0.004			N.D.	N.D.	N.D.	NA	0.184923	0.238476	0.500935	-4.61683	-2.57825	1.68193	N.D.	N.D.	NA	0.238521	0.890687	0.969152		Exp. q-value: p-value adjusted for False Discovery Rate (FDR)
+pH fractionation/SP	High	A2RRP1		Neuroblastoma-amplified sequence OS=Homo sapiens OX=9606 GN=NBAS PE=1 SV=2	ENSG00000151779	NBAS	0	1.37117	1.30101	0.150732	0.398728	0.789746	0.894193	-0.0701561	0.789746	0.892428	0.970004	0.611557	0.407001	0.600262	0.440214	0.810663	-0.358447	0.440214	0.815188		adjusted p.value: adjusted for FDR using the Benjamini and Hochberg method
+pH fractionation/SP	High	A3KMH1		von Willebrand factor A domain-containing protein 8 OS=Homo sapiens OX=9606 GN=VWA8 PE=1 SV=2	ENSG00000102763	VWA8	0	0.175017	0.567446	0.626385	0.713103	0.513497	0.728458	0.392429	0.513497	0.723898	0.011213	0.477726	0.220439	0.274587	0.083423	0.482276	0.466513	0.083423	0.48838		log2 FC (S/U): positive values = higher protein abundance in stimulated cells, negative values = higher protein abundance in unstimulated cells. Missing values were imputed in order to visualize (in the volcano plots) proteins that are in one condition but not the other (e.g. protein identified in the nuclear fraction of stimulated cells but not the nuclear fraction of unstimulated cells).
+pH fractionation/SP	High	A3KN83		Protein strawberry notch homolog 1 OS=Homo sapiens OX=9606 GN=SBNO1 PE=1 SV=1	ENSG00000139697	SBNO1	0	1.05777	0.0745614	0.29285	0.204485	0.00885402	0.114388	-0.983208	0.00885402	0.113115	-0.948426	-1.29798	0.920239	0.379666	0.575901	0.868239	-0.349554	0.575901	0.870051		p.value (imputed MVs)= determined p-value for each protein after imputing missing values
+pH fractionation/SP	High	A4D1E9		GTP-binding protein 10 OS=Homo sapiens OX=9606 GN=GTPBP10 PE=1 SV=1	ENSG00000105793	GTPBP10	0.001	-2.17801	-2.19274	0.730337	0.499183	0.978365	0.990734	-0.0147356	0.978365	0.989764	-2.16996	-4.33404	2.51723	4.11538	0.505326	0.83679	-2.88259	0.284535	0.707762		FC adjusted p.value: adjusted for FDR using the Benjamini and Hochberg method
+pH fractionation/SP	High	A5PLL7		Transmembrane protein 189 OS=Homo sapiens OX=9606 GN=TMEM189 PE=1 SV=3	ENSG00000240849	TMEM189; TMEM189-UBE2V1	0.002	-4.14182	-3.70388	0.478363	0.802259	0.462307	0.691964	0.437936	0.462307	0.686706	-5.36095		N.D.	N.D.	N.D.	NA	-0.0836752	0.870049	0.964679
+pH fractionation/SP	High	A5PLN9-5		Isoform 4 of Trafficking protein particle complex subunit 13 OS=Homo sapiens OX=9606 GN=TRAPPC13	ENSG00000113597	C5orf44; TRAPPC13	0.001	-1.13276	-1.47422	0.342548	2.21063	0.804547	0.900898	-0.341463	0.804547	0.898756	-4.11281	-3.04826	1.41401	1.1288	0.365781	0.766347	1.06455	0.365781	0.769883
+pH fractionation/SP	High	A5YKK6		CCR4-NOT transcription complex subunit 1 OS=Homo sapiens OX=9606 GN=CNOT1 PE=1 SV=2	ENSG00000125107	CNOT1	0	3.84194	3.60433	0.115954	0.155691	0.101343	0.329312	-0.237607	0.101343	0.337787	4.52671	4.30244	0.311239	0.21736	0.364033	0.764939	-0.224273	0.364033	0.768423
+pH fractionation/SP	High	A6NCE7		Microtubule-associated proteins 1A/1B light chain 3 beta 2 OS=Homo sapiens OX=9606 GN=MAP1LC3B2 PE=2 SV=1	ENSG00000258102	MAP1LC3B2	0.002	-1.2272	-1.05204	0.395601	0.764461	0.742277	0.865288	0.175161	0.742277	0.862922	-1.23681	-2.12243	0.776065	1.73255	0.464398	0.823472	-0.885618	0.464398	0.827652
+pH fractionation/SP	High	A6NDG6		Glycerol-3-phosphate phosphatase OS=Homo sapiens OX=9606 GN=PGP PE=1 SV=1	ENSG00000184207	PGP	0	1.10054	0.0675418	0.189922	0.217236	0.00344049	0.0830903	-1.03299	0.00344049	0.0835337	-2.19761	-1.68787	0.264472	0.720339	0.314016	0.734177	0.509736	0.314016	0.735575
+pH fractionation/SP	High	A6NDU8		UPF0600 protein C5orf51 OS=Homo sapiens OX=9606 GN=C5orf51 PE=1 SV=1	ENSG00000205765	C5orf51	0.005	-3.73233	-2.93781	0.891133	1.35645	0.560313	0.758553	0.503325	0.743721	0.863757	-6.86092	-4.66321	N.D.	N.D.	N.D.	NA	0.823959	0.249906	0.686039
+pH fractionation/SP	High	A6NHL2		Tubulin alpha chain-like 3 OS=Homo sapiens OX=9606 GN=TUBAL3 PE=1 SV=2	ENSG00000178462	TUBAL3	0	1.64013	1.92237	0.521033	1.1718	0.722442	0.853221	0.282237	0.722442	0.851989	-0.252335	1.05619	0.615556	1.64186	0.265779	0.700794	1.30852	0.265779	0.696109
+pH fractionation/SP	High	A6NHR9		Structural maintenance of chromosomes flexible hinge domain-containing protein 1 OS=Homo sapiens OX=9606 GN=SMCHD1 PE=1 SV=2	ENSG00000101596	SMCHD1	0	2.45875	2.09251	0.0417646	0.0249717	0.000199857	0.0301033	-0.366239	0.000199857	0.0278667	4.89541	4.91222	0.125207	0.258187	0.924043	0.980131	0.0168141	0.924043	0.979932
+pH fractionation/SP	High	A6NIH7		Protein unc-119 homolog B OS=Homo sapiens OX=9606 GN=UNC119B PE=1 SV=1	ENSG00000175970	UNC119B	0	-0.726238	0.143548	0.296655	0.291781	0.0223464	0.168334	0.869787	0.0223464	0.173983	-0.962503	-0.86179	1.12693	0.736211	0.903147	0.973397	0.100713	0.903147	0.972777
+pH fractionation/SP	High	A8CG34		Nuclear envelope pore membrane protein POM 121C OS=Homo sapiens OX=9606 GN=POM121C PE=1 SV=3		POM121C	0	-1.33642	-2.83488	0.214473	2.19792	0.290119	0.55264	-2.54697	0.139893	0.392657	1.77769	1.3111	0.392744	0.354803	0.201489	0.647051	-0.466593	0.201489	0.64555
+pH fractionation/SP	High	A8MW92		PHD finger protein 20-like protein 1 OS=Homo sapiens OX=9606 GN=PHF20L1 PE=1 SV=2	ENSG00000129292	PHF20L1	0	-3.96671	-3.0345	2.98255	2.11608	0.68165	0.82845	0.932217	0.68165	0.825696	1.2604	1.49382	0.368189	0.186886	0.38295	0.776588	0.233417	0.38295	0.781417
+pH fractionation/SP	High	A8MW92-2		Isoform 2 of PHD finger protein 20-like protein 1 OS=Homo sapiens OX=9606 GN=PHF20L1	ENSG00000129292	PHF20L1	0		-6.50671	N.D.	0.892293	N.D.	NA	-0.31346	0.581634	0.76808	-2.17794	-2.09541	0.762717	0.775039	0.901753	0.973397	0.0825357	0.901753	0.972777
+pH fractionation/SP	High	A8MWD9		Putative small nuclear ribonucleoprotein G-like protein 15 OS=Homo sapiens OX=9606 GN=SNRPGP15 PE=5 SV=2		LOC100130932; SNRPGP15	0	3.00637	2.0494	1.17804	0.962271	0.337098	0.596499	-0.956974	0.337098	0.591827	3.77901	3.80094	0.470261	0.543677	0.96039	0.989338	0.0219316	0.96039	0.988902
+pH fractionation/SP	High	A8MWX3		Putative WAS protein family homolog 4 OS=Homo sapiens OX=9606 GN=WASH4P PE=5 SV=1		WASH4P	0.006	-4.71346	-3.99512	1.82458	2.91565	0.735846	0.861294	0.718341	0.735846	0.859493	-5.89391	-4.14717	N.D.	N.D.	N.D.	NA	0.760729	0.41928	0.807304
+pH fractionation/SP	High	A8MXV4		Nucleoside diphosphate-linked moiety X motif 19 OS=Homo sapiens OX=9606 GN=NUDT19 PE=1 SV=1	ENSG00000213965	NUDT19	0.006	-3.7933	-2.88705	0.432146	0.71504	0.133472	0.37786	0.906253	0.133472	0.383152	-4.69836	-5.48738	2.78057	0.773892	0.736304	0.921826	-0.393926	0.797968	0.944041
+pH fractionation/SP	High	B0I1T2		Unconventional myosin-Ig OS=Homo sapiens OX=9606 GN=MYO1G PE=1 SV=2	ENSG00000136286	MYO1G	0	3.79451	4.53358	0.307942	0.0736157	0.015565	0.147226	0.739065	0.015565	0.150146	6.30014	8.0227	0.302151	0.400302	0.00400618	0.177943	1.72256	0.00400618	0.182573
+pH fractionation/SP	High	E9PAV3		Nascent polypeptide-associated complex subunit alpha, muscle-specific form OS=Homo sapiens OX=9606 GN=NACA PE=1 SV=1	ENSG00000196531	NACA	0	4.39403	3.88515	0.0594229	0.287386	0.0398069	0.210637	-0.508878	0.0398069	0.219697	4.36563	3.34977	0.322888	0.292269	0.0156035	0.270898	-1.01586	0.0156035	0.280452
+pH fractionation/SP	High	E9PRG8		Uncharacterized protein C11orf98 OS=Homo sapiens OX=9606 GN=C11orf98 PE=4 SV=1	ENSG00000278615	LOC102288414; C11orf98	0.001	-4.76586	-3.2318	0.539513	0.369616	0.015312	0.146725	1.53406	0.015312	0.14928	2.32503	1.65036	0.0495093	0.353353	0.0306431	0.344031	-0.674665	0.0306431	0.356783
+pH fractionation/SP	High	O00116		Alkyldihydroxyacetonephosphate synthase, peroxisomal OS=Homo sapiens OX=9606 GN=AGPS PE=1 SV=1	ENSG00000018510	AGPS	0	2.37107	1.85276	0.245877	0.0440793	0.0228822	0.170001	-0.518313	0.0228822	0.175517	0.0812984	0.926567	0.786638	0.549652	0.2018	0.647051	0.845269	0.2018	0.64555
+pH fractionation/SP	High	O00139-2		Isoform 2 of Kinesin-like protein KIF2A OS=Homo sapiens OX=9606 GN=KIF2A	ENSG00000068796	KIF2A	0	2.75471	2.52086	0.181753	0.229946	0.239154	0.499293	-0.233855	0.239154	0.501303	3.74485	3.24746	0.0658255	0.164577	0.00827744	0.224516	-0.497388	0.00827744	0.231322
+pH fractionation/SP	High	O00148		ATP-dependent RNA helicase DDX39A OS=Homo sapiens OX=9606 GN=DDX39A PE=1 SV=2	ENSG00000123136	DDX39A	0	4.97786	4.54243	0.130665	0.239432	0.0505903	0.229956	-0.435433	0.0505903	0.239918	7.89663	7.71162	0.272449	0.279761	0.45797	0.820288	-0.185007	0.45797	0.824089
+pH fractionation/SP	High	O00151		PDZ and LIM domain protein 1 OS=Homo sapiens OX=9606 GN=PDLIM1 PE=1 SV=4	ENSG00000107438	PDLIM1	0	0.827714	-0.664963	0.172516	0.660217	0.0192895	0.155525	-1.49268	0.0192895	0.160931	-1.98621	-1.04541	0.784542	0.262075	0.120167	0.539946	0.9408	0.120167	0.543271
+pH fractionation/SP	High	O00154		Cytosolic acyl coenzyme A thioester hydrolase OS=Homo sapiens OX=9606 GN=ACOT7 PE=1 SV=3	ENSG00000097021	ACOT7	0	5.32796	5.15381	0.0786394	0.172756	0.187233	0.446305	-0.174149	0.187233	0.450305	3.71002	3.50502	0.363071	0.431723	0.563206	0.8631	-0.205006	0.563206	0.863347
+pH fractionation/SP	High	O00161		Synaptosomal-associated protein 23 OS=Homo sapiens OX=9606 GN=SNAP23 PE=1 SV=1	ENSG00000092531	SNAP23	0	-0.433426	-0.965565	0.725513	0.815252	0.445912	0.679472	-0.532138	0.445912	0.675461	1.25416	1.62838	0.947081	0.676919	0.607352	0.877984	0.374222	0.607352	0.880436
+pH fractionation/SP	High	O00165-2		Isoform 2 of HCLS1-associated protein X-1 OS=Homo sapiens OX=9606 GN=HAX1	ENSG00000143575	HAX1	0	0.562224	-0.394724	0.153473	0.244526	0.00456073	0.0919344	-0.956948	0.00456073	0.09046	-1.91695	-1.52311	0.161331	0.0524847	0.0158529	0.270898	0.393843	0.0158529	0.281019
+pH fractionation/SP	High	O00170		AH receptor-interacting protein OS=Homo sapiens OX=9606 GN=AIP PE=1 SV=2		AIP	0	2.99435	2.97508	0.566853	0.218902	0.95883	0.981917	-0.0192701	0.95883	0.981471	1.92485	2.59531	0.743921	0.202333	0.206459	0.653027	0.67046	0.206459	0.650806
+pH fractionation/SP	High	O00178		GTP-binding protein 1 OS=Homo sapiens OX=9606 GN=GTPBP1 PE=1 SV=3	ENSG00000100226	GTPBP1	0	0.714798	0.486186	0.184814	0.407614	0.426276	0.666455	-0.228612	0.426276	0.661761	-0.414609	-0.684968	0.308736	0.574938	0.512698	0.839378	-0.27036	0.512698	0.840354
+pH fractionation/SP	High	O00182		Galectin-9 OS=Homo sapiens OX=9606 GN=LGALS9 PE=1 SV=2	ENSG00000168961	LGALS9	0	-5.14945	0.474875	2.02298	0.622219	0.0100106	0.120699	5.62433	0.0100106	0.119943	-4.6428	0.946667	2.07094	0.943849	0.0131178	0.255112	5.58947	0.0131178	0.266677
+pH fractionation/SP	High	O00186		Syntaxin-binding protein 3 OS=Homo sapiens OX=9606 GN=STXBP3 PE=1 SV=2	ENSG00000116266	STXBP3	0	-0.134967	0.0998314	0.273585	0.166935	0.27328	0.535857	0.234798	0.27328	0.535174	-1.77139	-2.2652	0.68991	0.708783	0.435968	0.809072	-0.493812	0.435968	0.815188
+pH fractionation/SP	High	O00193		Small acidic protein OS=Homo sapiens OX=9606 GN=SMAP PE=1 SV=1	ENSG00000110696	C11orf58	0	2.55474	2.543	0.413326	0.372952	0.972614	0.987824	-0.0117397	0.972614	0.98731	-1.62203	-0.178276	0.910171	0.123322	0.0528455	0.425695	1.44376	0.0528455	0.435253
+pH fractionation/SP	High	O00203		AP-3 complex subunit beta-1 OS=Homo sapiens OX=9606 GN=AP3B1 PE=1 SV=3	ENSG00000132842	AP3B1	0	1.73444	1.85435	0.224737	0.225535	0.549793	0.750441	0.119908	0.549793	0.746829	-0.433497	-0.00320211	0.154084	0.25406	0.066179	0.457989	0.430295	0.066179	0.464479
+pH fractionation/SP	High	O00214-2		Isoform 2 of Galectin-8 OS=Homo sapiens OX=9606 GN=LGALS8	ENSG00000116977	LGALS8	0	-1.07124	0.541989	0.817428	0.472457	0.0415747	0.213804	1.61323	0.0415747	0.222524	0.733004	1.02249	0.301589	0.467987	0.418721	0.798611	0.289488	0.418721	0.806735
+pH fractionation/SP	High	O00217		NADH dehydrogenase [ubiquinone] iron-sulfur protein 8, mitochondrial OS=Homo sapiens OX=9606 GN=NDUFS8 PE=1 SV=1	ENSG00000110717	NDUFS8	0.001	-0.135706	-0.0677161	0.376101	0.552655	0.868727	0.936961	0.0679899	0.868727	0.93478	-2.24494	-1.96412	2.00997	1.18215	0.84496	0.955566	0.280821	0.84496	0.957832
+pH fractionation/SP	High	O00231-2		Isoform 2 of 26S proteasome non-ATPase regulatory subunit 11 OS=Homo sapiens OX=9606 GN=PSMD11		PSMD11	0	4.39023	4.28034	0.165029	0.550169	0.756998	0.875182	-0.10989	0.756998	0.872856	2.4083	2.59576	0.353663	0.171207	0.455043	0.819245	0.187463	0.455043	0.822957
+pH fractionation/SP	High	O00232		26S proteasome non-ATPase regulatory subunit 12 OS=Homo sapiens OX=9606 GN=PSMD12 PE=1 SV=3	ENSG00000197170	PSMD12	0	3.73307	3.56433	0.379227	0.174982	0.522609	0.735048	-0.168745	0.522609	0.730511	1.1179	1.89055	0.0941584	0.606652	0.0947568	0.500727	0.772648	0.0947568	0.505567
+pH fractionation/SP	High	O00233		26S proteasome non-ATPase regulatory subunit 9 OS=Homo sapiens OX=9606 GN=PSMD9 PE=1 SV=3	ENSG00000110801	PSMD9	0	2.31532	1.51562	0.392104	0.255785	0.0416101	0.213804	-0.799697	0.0416101	0.222524	0.00514783	-0.195568	1.187	0.590991	0.806129	0.942376	-0.200716	0.806129	0.945683
+pH fractionation/SP	High	O00244		Copper transport protein ATOX1 OS=Homo sapiens OX=9606 GN=ATOX1 PE=1 SV=1	ENSG00000177556	ATOX1	0.001	0.322794	0.456503	0.333042	0.856458	0.813444	0.905398	0.133709	0.813444	0.903594	-0.355172	0.337276	0.656713	0.637325	0.26018	0.697577	0.692449	0.26018	0.692657
+pH fractionation/SP	High	O00255		Menin OS=Homo sapiens OX=9606 GN=MEN1 PE=1 SV=4	ENSG00000133895	MEN1	0	0.369178	-1.00797	0.399293	1.11658	0.114604	0.349705	-1.37715	0.114604	0.356475	1.77055	1.06465	0.338436	0.393063	0.0778999	0.472804	-0.705901	0.0778999	0.481621
+pH fractionation/SP	High	O00257		E3 SUMO-protein ligase CBX4 OS=Homo sapiens OX=9606 GN=CBX4 PE=1 SV=3	ENSG00000141582	CBX4	0	-5.66061	-0.969584	2.12732	1.04106	0.0265202	0.179516	4.69102	0.0265202	0.185352	1.12552	1.25014	0.241361	0.12631	0.472488	0.825922	0.124623	0.472488	0.829242
+pH fractionation/SP	High	O00264		Membrane-associated progesterone receptor component 1 OS=Homo sapiens OX=9606 GN=PGRMC1 PE=1 SV=3	ENSG00000101856	PGRMC1	0	0.221295	-0.174742	0.333814	0.458074	0.292817	0.554264	-0.396037	0.292817	0.553747	-1.79035	-1.42435	1.11823	0.73434	0.660302	0.896607	0.366002	0.660302	0.902542
+pH fractionation/SP	High	O00267		Transcription elongation factor SPT5 OS=Homo sapiens OX=9606 GN=SUPT5H PE=1 SV=1	ENSG00000196235	SUPT5H	0	3.24007	2.48839	0.242772	0.212427	0.0156564	0.147226	-0.751681	0.0156564	0.150484	4.14632	3.86171	0.0997306	0.207258	0.0987232	0.504903	-0.284613	0.0987232	0.508913
+pH fractionation/SP	High	O00268		Transcription initiation factor TFIID subunit 4 OS=Homo sapiens OX=9606 GN=TAF4 PE=1 SV=2	ENSG00000130699	TAF4	0	-2.19911	-2.95508	0.28044	0.222917	0.0216754	0.164895	-0.755976	0.0216754	0.170641	1.30727	1.25304	0.182072	0.126649	0.693686	0.911652	-0.0542337	0.693686	0.917645
+pH fractionation/SP	High	O00273		DNA fragmentation factor subunit alpha OS=Homo sapiens OX=9606 GN=DFFA PE=1 SV=1	ENSG00000160049	DFFA	0	2.57754	1.53978	0.806133	0.106256	0.0915664	0.311884	-1.03775	0.0915664	0.321078	-0.68058	-1.55842	0.999771	0.143583	0.206688	0.653027	-0.877835	0.206688	0.650806
+pH fractionation/SP	High	O00287		Regulatory factor X-associated protein OS=Homo sapiens OX=9606 GN=RFXAP PE=1 SV=1	ENSG00000133111	RFXAP	0.006	-2.99537	-2.56924	2.60324	3.3047	0.880568	0.944434	-0.747808	0.764907	0.877258	-3.99026	-4.02802	1.33624	1.91799	0.979018	0.99425	-0.0377629	0.979018	0.994594
+pH fractionation/SP	High	O00299		Chloride intracellular channel protein 1 OS=Homo sapiens OX=9606 GN=CLIC1 PE=1 SV=4	ENSG00000213719	CLIC1	0	3.91639	4.84592	0.245259	0.387955	0.0247216	0.174211	0.929529	0.0247216	0.179841	1.37966	2.44201	0.156286	0.612503	0.0436393	0.406207	1.06235	0.0436393	0.41687
+pH fractionation/SP	High	O00303		Eukaryotic translation initiation factor 3 subunit F OS=Homo sapiens OX=9606 GN=EIF3F PE=1 SV=1	ENSG00000280606	EIF3F	0	4.33556	3.42876	0.180615	0.302902	0.0112154	0.126528	-0.906802	0.0112154	0.126556	2.90231	2.41738	0.388916	0.232379	0.137363	0.56101	-0.484931	0.137363	0.561446
+pH fractionation/SP	High	O00308		NEDD4-like E3 ubiquitin-protein ligase WWP2 OS=Homo sapiens OX=9606 GN=WWP2 PE=1 SV=2	ENSG00000198373	WWP2	0	-1.95596	-1.89961	0.468764	0.298107	0.892377	0.952116	-1.35834	0.40057	0.641284	-2.91589	-4.57602	1.51841	2.76898	0.41405	0.795503	-1.66013	0.41405	0.803124
+pH fractionation/SP	High	O00329		Phosphatidylinositol 4,5-bisphosphate 3-kinase catalytic subunit delta isoform OS=Homo sapiens OX=9606 GN=PIK3CD PE=1 SV=2	ENSG00000171608	PIK3CD	0.002	-3.82863	-2.7642	1.00907	2.21732	0.491302	0.713137	1.06443	0.491302	0.708199	-6.71043	-5.17634	N.D.	1.12679	N.D.	NA	1.09933	0.153383	0.5835
+pH fractionation/SP	High	O00330		Pyruvate dehydrogenase protein X component, mitochondrial OS=Homo sapiens OX=9606 GN=PDHX PE=1 SV=3	ENSG00000110435	PDHX	0.001	-0.684986	-0.580157	0.356908	0.653849	0.819419	0.909079	0.104829	0.819419	0.906867	-1.61529	-0.579349	0.724327	0.855414	0.184676	0.625636	1.03595	0.184676	0.624897
+pH fractionation/SP	High	O00399		Dynactin subunit 6 OS=Homo sapiens OX=9606 GN=DCTN6 PE=1 SV=1	ENSG00000104671	DCTN6	0.001	0.463174	-0.350461	0.644115	1.66017	0.473002	0.700323	-0.813634	0.473002	0.696119	-0.86756	-1.25909	0.945324	0.773839	0.608404	0.877984	-0.391528	0.608404	0.881126
+pH fractionation/SP	High	O00410-3		Isoform 3 of Importin-5 OS=Homo sapiens OX=9606 GN=IPO5	ENSG00000065150	IPO5	0	4.23291	3.53034	0.0524339	0.245829	0.00839258	0.112655	-0.70257	0.00839258	0.111325	2.67646	2.38399	0.663994	0.163804	0.499996	0.836645	-0.292467	0.499996	0.837575
+pH fractionation/SP	High	O00411		DNA-directed RNA polymerase, mitochondrial OS=Homo sapiens OX=9606 GN=POLRMT PE=1 SV=2	ENSG00000099821	POLRMT	0	-2.05076	-3.89832	1.10001	1.07009	0.105397	0.336345	-1.84756	0.105397	0.344354	-2.05991	-2.8751	0.778933	0.976469	0.321503	0.739775	-0.815189	0.321503	0.741918
+pH fractionation/SP	High	O00422		Histone deacetylase complex subunit SAP18 OS=Homo sapiens OX=9606 GN=SAP18 PE=1 SV=1	ENSG00000150459	SAP18	0	2.0315	0.719206	0.132545	1.43096	0.188889	0.448229	-1.3123	0.188889	0.452012	5.96525	5.73925	0.454424	0.294915	0.509943	0.83851	-0.225992	0.509943	0.840328
+pH fractionation/SP	High	O00425		Insulin-like growth factor 2 mRNA-binding protein 3 OS=Homo sapiens OX=9606 GN=IGF2BP3 PE=1 SV=2	ENSG00000136231	IGF2BP3	0	3.25676	2.86878	0.386148	0.23135	0.209768	0.473615	-0.387978	0.209768	0.475703	3.84209	3.98908	0.182555	0.245039	0.451597	0.81825	0.14699	0.451597	0.822096
+pH fractionation/SP	High	O00429		Dynamin-1-like protein OS=Homo sapiens OX=9606 GN=DNM1L PE=1 SV=2	ENSG00000087470	DNM1L	0	2.66811	2.67936	0.176821	0.289697	0.957007	0.981311	0.0112405	0.957007	0.980949	-0.302315	0.61601	0.320597	0.625578	0.0864173	0.485872	0.918325	0.0864173	0.48973
+pH fractionation/SP	High	O00442		RNA 3'-terminal phosphate cyclase OS=Homo sapiens OX=9606 GN=RTCA PE=1 SV=1	ENSG00000137996	RTCA	0	1.93396	1.67309	0.629792	0.474039	0.597192	0.780533	-0.260865	0.597192	0.777686	0.341653	0.0833444	1.17044	0.644376	0.754556	0.926604	-0.258308	0.754556	0.931495
+pH fractionation/SP	High	O00471		Exocyst complex component 5 OS=Homo sapiens OX=9606 GN=EXOC5 PE=1 SV=1	ENSG00000070367	EXOC5	0	-0.548884	-0.31395	0.803013	0.228667	0.651504	0.813069	0.234935	0.651504	0.8107	-1.49072	-1.06419	0.802283	1.0654	0.609134	0.877984	0.426528	0.609134	0.881126
+pH fractionation/SP	High	O00479		High mobility group nucleosome-binding domain-containing protein 4 OS=Homo sapiens OX=9606 GN=HMGN4 PE=1 SV=3	ENSG00000182952	HMGN4	0.002	-0.932834	-1.47922	N.D.	0.388054	N.D.	NA	1.49681	0.567075	0.758939	-0.16629	0.558771	2.33681	2.4746	0.730846	0.921746	0.725061	0.730846	0.92674
+pH fractionation/SP	High	O00483		Cytochrome c oxidase subunit NDUFA4 OS=Homo sapiens OX=9606 GN=NDUFA4 PE=1 SV=1	ENSG00000189043	NDUFA4	0.001	-1.53783	0.12106	0.98732	0.378767	0.0531461	0.2365	1.65889	0.0531461	0.246843	-2.80395	-3.20642	1.16891	0.47294	0.609822	0.878083	-0.402466	0.609822	0.881275
+pH fractionation/SP	High	O00487		26S proteasome non-ATPase regulatory subunit 14 OS=Homo sapiens OX=9606 GN=PSMD14 PE=1 SV=1	ENSG00000115233	PSMD14	0	3.15699	3.2737	0.111997	0.201806	0.430576	0.669079	0.116704	0.430576	0.664567	2.85857	2.71666	0.880024	0.68257	0.836131	0.95265	-0.141912	0.836131	0.956042
+pH fractionation/SP	High	O00488		Zinc finger protein 593 OS=Homo sapiens OX=9606 GN=ZNF593 PE=1 SV=2	ENSG00000142684	ZNF593	0	-5.23346	-5.5418	0.539027	0.61335	0.592015	0.777171	-0.499718	0.322307	0.578719	-0.152838	-1.57394	0.4036	0.0975531	0.00405807	0.177943	-1.42111	0.00405807	0.182573
+pH fractionation/SP	High	O00505		Importin subunit alpha-4 OS=Homo sapiens OX=9606 GN=KPNA3 PE=1 SV=2	ENSG00000102753	KPNA3	0	1.03494	0.85975	0.386006	0.756359	0.738888	0.863174	-0.175195	0.738888	0.860888	1.58882	1.32698	0.444928	1.01424	0.703169	0.911914	-0.261835	0.703169	0.918853
+pH fractionation/SP	High	O00534		von Willebrand factor A domain-containing protein 5A OS=Homo sapiens OX=9606 GN=VWA5A PE=2 SV=2	ENSG00000110002	VWA5A	0	-2.93623	-0.772844	1.09314	0.647507	0.0420004	0.213804	2.16338	0.0420004	0.222524	-2.57662	-4.03567	1.43071	1.6382	0.384162	0.776811	0.035179	0.985834	0.996319
+pH fractionation/SP	High	O00541		Pescadillo homolog OS=Homo sapiens OX=9606 GN=PES1 PE=1 SV=1	ENSG00000100029	PES1	0	3.45812	2.33363	0.477665	0.371545	0.0323276	0.196508	-1.12448	0.0323276	0.203339	5.58261	4.99669	0.163951	0.0826213	0.00523229	0.194232	-0.585922	0.00523229	0.19981
+pH fractionation/SP	High	O00560		Syntenin-1 OS=Homo sapiens OX=9606 GN=SDCBP PE=1 SV=1	ENSG00000137575	SDCBP	0.004	-2.21415	-1.7726	0.369976	0.0555953	0.209572	0.473533	-0.947915	0.537138	0.738982	-3.9658	-2.97836	2.45231	1.21924	0.645428	0.891	-0.210294	0.918064	0.977626
+pH fractionation/SP	High	O00566		U3 small nucleolar ribonucleoprotein protein MPP10 OS=Homo sapiens OX=9606 GN=MPHOSPH10 PE=1 SV=2	ENSG00000124383	MPHOSPH10	0	-1.09324	-1.20596	0.433658	0.627261	0.810562	0.903858	-0.112719	0.810562	0.90195	4.23385	3.3947	0.103676	0.186794	0.00243866	0.151527	-0.839154	0.00243866	0.150738
+pH fractionation/SP	High	O00567		Nucleolar protein 56 OS=Homo sapiens OX=9606 GN=NOP56 PE=1 SV=4	ENSG00000101361	NOP56	0	1.37078	2.22321	0.662089	0.936405	0.267389	0.530582	0.852431	0.267389	0.530942	7.20333	6.70918	0.0646238	0.279306	0.0405179	0.393342	-0.494152	0.0405179	0.405651
+pH fractionation/SP	High	O00571		ATP-dependent RNA helicase DDX3X OS=Homo sapiens OX=9606 GN=DDX3X PE=1 SV=3	ENSG00000215301	DDX3X	0	5.24978	4.95381	0.486309	0.265633	0.407263	0.652195	-0.29597	0.407263	0.64674	7.21113	6.97156	0.12817	0.167346	0.120371	0.539946	-0.239569	0.120371	0.543271
+pH fractionation/SP	High	O00629		Importin subunit alpha-3 OS=Homo sapiens OX=9606 GN=KPNA4 PE=1 SV=1	ENSG00000186432	KPNA4	0	3.23002	1.82313	0.686574	0.456967	0.0417766	0.213804	-1.4069	0.0417766	0.222524	3.21621	2.71805	0.819134	0.452375	0.408663	0.792519	-0.498166	0.408663	0.799721
+pH fractionation/SP	High	O00635		E3 ubiquitin-protein ligase TRIM38 OS=Homo sapiens OX=9606 GN=TRIM38 PE=1 SV=1	ENSG00000112343	TRIM38	0.007	-4.11119	-3.64345	N.D.	2.13302	N.D.	NA	1.18279	0.454009	0.681279	-4.89394	-2.93851	1.07451	0.562347	0.105976	0.517145	0.810586	0.572984	0.868296
+pH fractionation/SP	High	O00716		Transcription factor E2F3 OS=Homo sapiens OX=9606 GN=E2F3 PE=1 SV=1	ENSG00000112242	E2F3	0.002	-5.50271	-6.23254	2.1489	N.D.	N.D.	NA	-0.586924	0.66167	0.816303	-3.26144	-2.08143	1.28304	0.193504	0.307348	0.724787	-0.248139	0.885031	0.969051
+pH fractionation/SP	High	O00743-3		Isoform 3 of Serine/threonine-protein phosphatase 6 catalytic subunit OS=Homo sapiens OX=9606 GN=PPP6C	ENSG00000119414	PPP6C	0	2.99517	2.75591	0.225912	0.164446	0.212203	0.474569	-0.239258	0.212203	0.478064	0.651986	1.38241	0.154996	0.500495	0.0731873	0.466421	0.730426	0.0731873	0.472649
+pH fractionation/SP	High	O00746		Nucleoside diphosphate kinase, mitochondrial OS=Homo sapiens OX=9606 GN=NME4 PE=1 SV=1	ENSG00000103202	NME4	0	-0.937069	-2.37021	0.510011	0.635291	0.0381424	0.209671	-1.43315	0.0381424	0.218025	-2.84797	-2.47402	0.649246	0.529667	0.482656	0.831589	0.373951	0.482656	0.833616
+pH fractionation/SP	High	O00750		Phosphatidylinositol 4-phosphate 3-kinase C2 domain-containing subunit beta OS=Homo sapiens OX=9606 GN=PIK3C2B PE=1 SV=2	ENSG00000133056	PIK3C2B	0	-2.12958	1.9642	0.108509	0.312841	2.81248e-05	0.0135168	4.09378	2.81248e-05	0.0144083	-0.84696	-0.448046	0.488398	0.528096	0.391174	0.780669	0.398914	0.391174	0.78804
+pH fractionation/SP	High	O00754		Lysosomal alpha-mannosidase OS=Homo sapiens OX=9606 GN=MAN2B1 PE=1 SV=3	ENSG00000104774	MAN2B1	0	-1.27815	-0.560009	1.17868	0.661299	0.409477	0.653255	0.718138	0.409477	0.647756	-3.58001	-3.04712	2.44092	1.8926	0.779951	0.936383	0.532893	0.779951	0.940755
+pH fractionation/SP	High	O00764		Pyridoxal kinase OS=Homo sapiens OX=9606 GN=PDXK PE=1 SV=1	ENSG00000160209	PDXK	0	0.136838	-0.432893	0.174353	0.850622	0.319227	0.58004	-0.569731	0.319227	0.576251	-1.92849	-1.77701	0.794829	0.379107	0.780583	0.936383	0.151479	0.780583	0.940755
+pH fractionation/SP	High	O00767		Acyl-CoA desaturase OS=Homo sapiens OX=9606 GN=SCD PE=1 SV=2	ENSG00000099194	SCD	0	1.38668	-1.011	0.437039	0.254909	0.00120051	0.0584969	-2.39768	0.00120051	0.0580176	-1.53305	-0.817281	0.944543	0.785415	0.369961	0.769512	0.715772	0.369961	0.772838
+pH fractionation/SP	High	O14497		AT-rich interactive domain-containing protein 1A OS=Homo sapiens OX=9606 GN=ARID1A PE=1 SV=3	ENSG00000117713	ARID1A	0	2.01724	2.38206	0.159129	0.142102	0.041479	0.213804	0.364818	0.041479	0.222524	4.8862	4.62628	0.0283314	0.331122	0.246993	0.687394	-0.259917	0.246993	0.684384
+pH fractionation/SP	High	O14521		Succinate dehydrogenase [ubiquinone] cytochrome b small subunit, mitochondrial OS=Homo sapiens OX=9606 GN=SDHD PE=1 SV=1	ENSG00000204370	SDHD	0.002	-0.887472	-0.292089	0.133111	0.290673	0.0321091	0.196508	0.595383	0.0321091	0.20305	-4.73683	-3.69309	0.59536	0.200192	0.0574868	0.44143	1.7366	0.079696	0.481783
+pH fractionation/SP	High	O14530		Thioredoxin domain-containing protein 9 OS=Homo sapiens OX=9606 GN=TXNDC9 PE=1 SV=2	ENSG00000115514	TXNDC9	0	0.667531	-0.315782	0.154406	0.180679	0.00200745	0.0681518	-0.983313	0.00200745	0.0692341	-1.31442	-2.18766	0.0499114	0.592316	0.063674	0.455678	-0.873246	0.063674	0.461811
+pH fractionation/SP	High	O14562		Ubiquitin domain-containing protein UBFD1 OS=Homo sapiens OX=9606 GN=UBFD1 PE=1 SV=2	ENSG00000103353	UBFD1	0	-0.37438	-0.366755	0.547689	0.641761	0.988261	0.994349	0.0076248	0.988261	0.993781	-1.19592	-2.34519	0.788799	0.416938	0.0895044	0.487136	-1.14927	0.0895044	0.493352
+pH fractionation/SP	High	O14578-4		Isoform 4 of Citron Rho-interacting kinase OS=Homo sapiens OX=9606 GN=CIT	ENSG00000122966	CIT	0	-1.18787	-1.99306	0.777977	0.390672	0.184417	0.445157	-0.805187	0.184417	0.449353	0.193451	-0.740373	0.28161	0.681109	0.0932201	0.496889	-0.933824	0.0932201	0.502173
+pH fractionation/SP	High	O14579		Coatomer subunit epsilon OS=Homo sapiens OX=9606 GN=COPE PE=1 SV=3	ENSG00000105669	COPE	0	1.03592	1.00615	0.721202	0.350534	0.951826	0.978916	-0.0297629	0.951826	0.977783	-2.38621	-1.93407	0.891297	0.420684	0.471333	0.825922	0.452146	0.471333	0.829203
+pH fractionation/SP	High	O14602		Eukaryotic translation initiation factor 1A, Y-chromosomal OS=Homo sapiens OX=9606 GN=EIF1AY PE=1 SV=4	ENSG00000198692	EIF1AY	0	2.5786	1.43379	0.476367	1.3943	0.2496	0.510911	-1.14481	0.2496	0.512729	1.58098	1.38612	1.00911	1.06555	0.829395	0.95145	-0.194853	0.829395	0.955087
+pH fractionation/SP	High	O14617-5		Isoform 5 of AP-3 complex subunit delta-1 OS=Homo sapiens OX=9606 GN=AP3D1	ENSG00000065000	AP3D1	0	2.74528	2.59569	0.134725	0.141764	0.255847	0.518116	-0.149589	0.255847	0.51907	1.75495	1.65496	0.582416	0.428684	0.822512	0.949587	-0.0999839	0.822512	0.952686
+pH fractionation/SP	High	O14618		Copper chaperone for superoxide dismutase OS=Homo sapiens OX=9606 GN=CCS PE=1 SV=1	ENSG00000173992	CCS	0	-1.20132	-0.205464	0.391381	0.243714	0.0201013	0.159681	0.995861	0.0201013	0.165296	-4.2976	-2.8459	1.24119	0.848207	0.169729	0.612024	1.4517	0.169729	0.611477
+pH fractionation/SP	High	O14641		Segment polarity protein dishevelled homolog DVL-2 OS=Homo sapiens OX=9606 GN=DVL2 PE=1 SV=1	ENSG00000004975	DVL2	0	-0.613789	-1.42938	0.148217	0.362335	0.0225872	0.169108	-0.815587	0.0225872	0.174824	-3.31571	-2.46317	1.36031	0.272692	0.347155	0.751865	0.852543	0.347155	0.754385
+pH fractionation/SP	High	O14646		Chromodomain-helicase-DNA-binding protein 1 OS=Homo sapiens OX=9606 GN=CHD1 PE=1 SV=2	ENSG00000153922	CHD1	0	2.24311	1.23413	0.32564	0.480691	0.0395528	0.210277	-1.00897	0.0395528	0.219295	4.07265	3.71037	0.688219	0.449104	0.487679	0.832745	-0.362281	0.487679	0.833905
+pH fractionation/SP	High	O14647		Chromodomain-helicase-DNA-binding protein 2 OS=Homo sapiens OX=9606 GN=CHD2 PE=1 SV=2	ENSG00000173575	CHD2	0	-2.70473	-1.70467	0.415664	0.850679	0.141312	0.39003	1.00006	0.141312	0.395161	1.22014	1.81515	0.205847	0.377781	0.0747234	0.467839	0.595007	0.0747234	0.475706
+pH fractionation/SP	High	O14653-2		Isoform B of Golgi SNAP receptor complex member 2 OS=Homo sapiens OX=9606 GN=GOSR2	ENSG00000108433	GOSR2	0.001	-2.80845	-2.05338	0.822628	0.377899	0.222061	0.483578	0.755067	0.222061	0.486613	-3.62995	-5.29685	1.13023	0.814972	0.106988	0.520344	-1.66689	0.106988	0.526321
+pH fractionation/SP	High	O14656		Torsin-1A OS=Homo sapiens OX=9606 GN=TOR1A PE=1 SV=1	ENSG00000136827	TOR1A	0	-0.885201	-0.884502	0.552362	0.188289	0.998444	0.999139	0.000699166	0.998444	0.998905	-3.74879	-2.89224	0.762863	0.803295	0.251537	0.689761	0.85655	0.251537	0.686534
+pH fractionation/SP	High	O14657		Torsin-1B OS=Homo sapiens OX=9606 GN=TOR1B PE=1 SV=2	ENSG00000136816	TOR1B	0.001	-2.33832	-1.72663	0.623694	0.597773	0.287315	0.550037	0.611681	0.287315	0.549014	-3.66261	-2.94116	0.779438	1.65866	0.532775	0.850155	0.72145	0.532775	0.849898
+pH fractionation/SP	High	O14672		Disintegrin and metalloproteinase domain-containing protein 10 OS=Homo sapiens OX=9606 GN=ADAM10 PE=1 SV=1	ENSG00000137845	ADAM10	0	2.01553	1.47835	0.130538	0.336724	0.0615654	0.253323	-0.537179	0.0615654	0.264176	1.23768	0.870397	1.02869	1.32434	0.723701	0.920719	-0.367285	0.723701	0.925873
+pH fractionation/SP	High	O14681		Etoposide-induced protein 2.4 homolog OS=Homo sapiens OX=9606 GN=EI24 PE=1 SV=4	ENSG00000149547	EI24	0.004	-2.9738	-4.49223	0.861218	2.78123	0.412682	0.656545	-2.03367	0.204345	0.469023	-4.97386	-4.36671	N.D.	N.D.	N.D.	NA	0.387821	0.693601	0.917645
+pH fractionation/SP	High	O14683		Tumor protein p53-inducible protein 11 OS=Homo sapiens OX=9606 GN=TP53I11 PE=1 SV=2	ENSG00000175274	TP53I11	0.002	-2.94358	-1.12066	2.24599	0.633853	0.247489	0.510559	1.82292	0.247489	0.512028	0.603145	-0.846447	2.36562	3.06924	0.552348	0.859783	-1.44959	0.552348	0.859171
+pH fractionation/SP	High	O14733-2		Isoform 2 of Dual specificity mitogen-activated protein kinase kinase 7 OS=Homo sapiens OX=9606 GN=MAP2K7		MAP2K7	0.001	-2.14892	-2.95556	0.110019	0.382456	0.0246561	0.174211	-0.806641	0.0246561	0.179841	-3.61673	-3.8357	0.546661	0.399792	0.692364	0.910988	0.0280407	0.985128	0.996319
+pH fractionation/SP	High	O14734		Acyl-coenzyme A thioesterase 8 OS=Homo sapiens OX=9606 GN=ACOT8 PE=1 SV=1	ENSG00000101473	ACOT8	0	-0.704639	-0.973908	0.196242	0.399839	0.354146	0.60818	-0.269269	0.354146	0.603358	-2.72098	-1.92164	1.99689	0.954936	0.565567	0.864438	0.799341	0.565567	0.864834
+pH fractionation/SP	High	O14735		CDP-diacylglycerol--inositol 3-phosphatidyltransferase OS=Homo sapiens OX=9606 GN=CDIPT PE=1 SV=1	ENSG00000103502	CDIPT	0	-0.37339	-0.409326	0.541232	0.687498	0.946704	0.975737	-0.0359357	0.946704	0.975063	-3.0591	-2.08272	2.59264	0.768661	0.556982	0.860655	2.17619	0.260154	0.692657
+pH fractionation/SP	High	O14737		Programmed cell death protein 5 OS=Homo sapiens OX=9606 GN=PDCD5 PE=1 SV=3	ENSG00000105185	PDCD5	0	1.56356	-0.0469102	0.805165	0.794507	0.0692458	0.270346	-1.61047	0.0692458	0.282217	-2.5308	-1.56464	0.413916	0.28821	0.0294378	0.338245	0.966155	0.0294378	0.35072
+pH fractionation/SP	High	O14744		Protein arginine N-methyltransferase 5 OS=Homo sapiens OX=9606 GN=PRMT5 PE=1 SV=4	ENSG00000100462	PRMT5	0	4.20767	3.74646	0.147509	0.0858311	0.0094421	0.117502	-0.46121	0.0094421	0.116521	3.86383	3.33106	0.623239	0.575263	0.337757	0.746148	-0.532775	0.337757	0.748413
+pH fractionation/SP	High	O14745		Na(+)/H(+) exchange regulatory cofactor NHE-RF1 OS=Homo sapiens OX=9606 GN=SLC9A3R1 PE=1 SV=4	ENSG00000109062	SLC9A3R1	0	2.17265	1.79542	0.962332	0.637437	0.601609	0.783135	-0.377232	0.601609	0.780462	-0.418066	-0.519902	0.658704	0.881906	0.880459	0.968254	-0.101835	0.880459	0.968457
+pH fractionation/SP	High	O14757		Serine/threonine-protein kinase Chk1 OS=Homo sapiens OX=9606 GN=CHEK1 PE=1 SV=2	ENSG00000149554	CHEK1	0	0.586574	-3.30709	0.238275	1.18439	0.00504986	0.0953123	-3.89367	0.00504986	0.0942672	-1.63199	-0.893137	0.611012	0.650338	0.224842	0.667758	0.738856	0.224842	0.667399
+pH fractionation/SP	High	O14773		Tripeptidyl-peptidase 1 OS=Homo sapiens OX=9606 GN=TPP1 PE=1 SV=2	ENSG00000166340	TPP1	0	-1.17081	-0.0677823	0.352203	0.489934	0.033979	0.199424	1.10303	0.033979	0.206526	-3.90923	-2.54789	0.181913	0.637325	0.0673413	0.460309	2.30286	0.0855407	0.489142
+pH fractionation/SP	High	O14776		Transcription elongation regulator 1 OS=Homo sapiens OX=9606 GN=TCERG1 PE=1 SV=2	ENSG00000113649	TCERG1	0	2.92804	2.79407	0.133566	0.250654	0.459814	0.689801	-0.133965	0.459814	0.684656	4.38613	4.00415	0.0945849	0.105763	0.00956877	0.236571	-0.38198	0.00956877	0.243901
+pH fractionation/SP	High	O14777		Kinetochore protein NDC80 homolog OS=Homo sapiens OX=9606 GN=NDC80 PE=1 SV=1	ENSG00000080986	NDC80	0	-1.62731	-5.31388	0.722575	1.07797	0.0181246	0.153088	-3.91306	0.0037773	0.0867763	-3.71453	-4.07512	1.06665	0.0498177	0.681102	0.906152	-1.1221	0.315875	0.737538
+pH fractionation/SP	High	O14782		Kinesin-like protein KIF3C OS=Homo sapiens OX=9606 GN=KIF3C PE=1 SV=3		KIF3C	0.004	-3.44073	-3.66191	0.079823	0.851451	0.677373	0.826887	-0.221177	0.677373	0.824271	-4.72199	-4.81892	1.28911	1.88539	0.94493	0.984761	-0.0969326	0.94493	0.984518
+pH fractionation/SP	High	O14787-2		Isoform 2 of Transportin-2 OS=Homo sapiens OX=9606 GN=TNPO2	ENSG00000105576	TNPO2	0	1.23548	1.12373	0.00973876	0.136389	0.22983	0.492009	-0.111752	0.22983	0.494713	0.250493	0.500609	0.314842	0.421598	0.456585	0.819245	0.250116	0.456585	0.822957
+pH fractionation/SP	High	O14802		DNA-directed RNA polymerase III subunit RPC1 OS=Homo sapiens OX=9606 GN=POLR3A PE=1 SV=2	ENSG00000148606	POLR3A	0	-1.35274	-1.10024	0.498986	0.185621	0.457527	0.688026	0.252497	0.457527	0.683218	-2.52999	-2.84984	0.879458	0.82461	0.669725	0.900458	-0.319846	0.669725	0.905278
+pH fractionation/SP	High	O14818		Proteasome subunit alpha type-7 OS=Homo sapiens OX=9606 GN=PSMA7 PE=1 SV=1	ENSG00000101182	PSMA7	0	4.98882	4.93367	0.0258764	0.0539451	0.185626	0.445271	-0.0551458	0.185626	0.449353	2.59926	2.64278	0.332086	0.298581	0.874156	0.966143	0.0435185	0.874156	0.966269
+pH fractionation/SP	High	O14828		Secretory carrier-associated membrane protein 3 OS=Homo sapiens OX=9606 GN=SCAMP3 PE=1 SV=3	ENSG00000116521	SCAMP3	0	1.35302	1.43182	0.194991	0.264189	0.698976	0.83982	0.0788031	0.698976	0.836062	-1.22057	-1.06571	0.699093	0.435893	0.761065	0.929924	0.15486	0.761065	0.935369
+pH fractionation/SP	High	O14841		5-oxoprolinase OS=Homo sapiens OX=9606 GN=OPLAH PE=1 SV=3	ENSG00000178814	OPLAH	0.001	-3.58868	-2.3766	1.32024	0.746305	0.238489	0.498773	1.21207	0.238489	0.500935	-6.82666	-7.17295	1.07936	2.01666	0.850314	0.958031	-0.233519	0.820577	0.952031
+pH fractionation/SP	High	O14874		[3-methyl-2-oxobutanoate dehydrogenase [lipoamide]] kinase, mitochondrial OS=Homo sapiens OX=9606 GN=BCKDK PE=1 SV=2	ENSG00000103507	BCKDK	0.001	-5.69112	-5.54985	2.08785	1.50024	0.933924	0.970893	0.334508	0.799192	0.896292	-4.40403	-4.22335	0.604077	0.0528048	0.715586	0.916107	-0.527905	0.540597	0.85461
+pH fractionation/SP	High	O14880		Microsomal glutathione S-transferase 3 OS=Homo sapiens OX=9606 GN=MGST3 PE=1 SV=1	ENSG00000143198	MGST3	0.001	-0.739509	-0.433277	1.15219	0.654474	0.709406	0.846007	0.306232	0.709406	0.843223	-2.90971	-2.04176	1.69245	0.46671	0.440103	0.810663	0.867947	0.440103	0.815188
+pH fractionation/SP	High	O14893		Gem-associated protein 2 OS=Homo sapiens OX=9606 GN=GEMIN2 PE=1 SV=1	ENSG00000092208	GEMIN2	0.004	-2.78949	-4.27253	0.195215	0.223282	0.000977827	0.0552875	-1.48304	0.000977827	0.0550484	-1.82632	-1.96022	1.55456	1.92564	0.929846	0.981586	-0.133896	0.929846	0.980461
+pH fractionation/SP	High	O14908		PDZ domain-containing protein GIPC1 OS=Homo sapiens OX=9606 GN=GIPC1 PE=1 SV=2	ENSG00000123159	GIPC1	0	0.516957	0.203603	0.380904	0.501311	0.437278	0.673576	-0.313354	0.437278	0.669308	1.40741	1.79102	0.508973	0.398279	0.362013	0.764566	0.383609	0.362013	0.767312
+pH fractionation/SP	High	O14920		Inhibitor of nuclear factor kappa-B kinase subunit beta OS=Homo sapiens OX=9606 GN=IKBKB PE=1 SV=1	ENSG00000104365	IKBKB	0	-2.04889	-1.53901	0.55781	0.207947	0.212096	0.474569	0.509882	0.212096	0.478033	-4.54594	-3.08786	0.702794	0.637771	0.0563266	0.438885	1.45808	0.0563266	0.447765
+pH fractionation/SP	High	O14929		Histone acetyltransferase type B catalytic subunit OS=Homo sapiens OX=9606 GN=HAT1 PE=1 SV=1		HAT1	0	3.13463	2.81668	0.20405	0.224187	0.143438	0.390823	-0.317946	0.143438	0.396165	0.872516	1.21649	0.603099	0.519773	0.49587	0.836422	0.343978	0.49587	0.836876
+pH fractionation/SP	High	O14933		Ubiquitin/ISG15-conjugating enzyme E2 L6 OS=Homo sapiens OX=9606 GN=UBE2L6 PE=1 SV=4	ENSG00000156587	UBE2L6	0	-0.947929	-1.55231	0.155713	0.493854	0.113292	0.347245	-0.604382	0.113292	0.353909	-1.87325	-3.38072	1.46166	1.84768	0.329891	0.742964	-1.50747	0.329891	0.743982
+pH fractionation/SP	High	O14950		Myosin regulatory light chain 12B OS=Homo sapiens OX=9606 GN=MYL12B PE=1 SV=2	ENSG00000118680	MYL12B; MYL12A	0	3.41725	4.36233	0.364181	0.274448	0.0229694	0.170197	0.945079	0.0229694	0.175736	0.955361	1.80303	0.338204	0.179041	0.0185116	0.285456	0.847665	0.0185116	0.295506
+pH fractionation/SP	High	O14964		Hepatocyte growth factor-regulated tyrosine kinase substrate OS=Homo sapiens OX=9606 GN=HGS PE=1 SV=1	ENSG00000185359	HGS	0	0.897124	0.713699	0.0573626	0.383881	0.45902	0.689276	-0.183425	0.45902	0.68429	-1.67915	-2.12259	0.323866	0.533507	0.285869	0.709704	-0.443448	0.285869	0.707762
+pH fractionation/SP	High	O14965		Aurora kinase A OS=Homo sapiens OX=9606 GN=AURKA PE=1 SV=2		AURKA	0.001	-3.74363	-6.2731	0.673005	4.30869	0.498262	0.718035	-1.79715	0.401102	0.641284	-3.03478	-3.84609	0.0472005	N.D.	N.D.	NA	-1.31928	0.406408	0.798007
+pH fractionation/SP	High	O14966		Ras-related protein Rab-7L1 OS=Homo sapiens OX=9606 GN=RAB29 PE=1 SV=1	ENSG00000117280	RAB7L1; RAB29	0.001	-1.77942	-1.41695	0.524623	0.643765	0.491725	0.713536	0.362479	0.491725	0.70861	-3.23086	-2.64313	0.482184	0.768856	0.32478	0.741061	0.587731	0.32478	0.743334
+pH fractionation/SP	High	O14967		Calmegin OS=Homo sapiens OX=9606 GN=CLGN PE=1 SV=1	ENSG00000153132	CLGN	0.002	-4.42416	-5.68485	0.783823	0.138603	0.154438	0.40581	-0.864053	0.203865	0.46855			N.D.	N.D.	N.D.	NA	0.228208	0.235388	0.671807
+pH fractionation/SP	High	O14972		Down syndrome critical region protein 3 OS=Homo sapiens OX=9606 GN=DSCR3 PE=2 SV=1	ENSG00000157538	DSCR3	0.001	-1.4907	-1.17707	0.194583	0.643537	0.464406	0.694226	0.313629	0.464406	0.68901	-1.13285	-2.60702	2.74649	0.868294	0.53282	0.850155	-2.75385	0.253839	0.690243
+pH fractionation/SP	High	O14974-4		Isoform 4 of Protein phosphatase 1 regulatory subunit 12A OS=Homo sapiens OX=9606 GN=PPP1R12A		PPP1R12A	0	1.99595	1.61056	0.227346	0.306156	0.154932	0.406749	-0.385391	0.154932	0.411764	2.74224	3.13681	0.517847	1.0821	0.599357	0.876317	0.39457	0.599357	0.879045
+pH fractionation/SP	High	O14975		Very long-chain acyl-CoA synthetase OS=Homo sapiens OX=9606 GN=SLC27A2 PE=1 SV=2	ENSG00000140284	SLC27A2	0.002	-5.52674	-3.48438	1.32919	0.803286	0.0849992	0.300631	2.04236	0.0849992	0.31015	-4.61423	-4.24321	0.718846	0.0548541	0.53898	0.853749	-0.38905	0.676618	0.910027
+pH fractionation/SP	High	O14976		Cyclin-G-associated kinase OS=Homo sapiens OX=9606 GN=GAK PE=1 SV=2	ENSG00000178950	GAK	0	1.10871	0.658414	0.387145	0.397682	0.232646	0.494803	-0.450296	0.232646	0.497469	-0.657461	-0.433387	0.92518	0.824956	0.769849	0.934993	0.224075	0.769849	0.939714
+pH fractionation/SP	High	O14979		Heterogeneous nuclear ribonucleoprotein D-like OS=Homo sapiens OX=9606 GN=HNRNPDL PE=1 SV=3	ENSG00000152795	HNRNPDL; HNRPDL	0	2.25426	2.54358	0.123834	1.07511	0.667413	0.821405	0.289311	0.667413	0.81896	6.75416	6.25959	0.115805	0.521176	0.183877	0.623841	-0.494563	0.183877	0.622704
+pH fractionation/SP	High	O14979-2		Isoform 2 of Heterogeneous nuclear ribonucleoprotein D-like OS=Homo sapiens OX=9606 GN=HNRNPDL	ENSG00000152795	HNRNPDL; HNRPDL	0	-3.54052	-3.63856	1.45135	1.78132	0.944636	0.975737	-0.0980386	0.944636	0.975063	0.497243	1.74324	1.83987	0.991297	0.360118	0.763608	1.246	0.360118	0.766148
+pH fractionation/SP	High	O14980		Exportin-1 OS=Homo sapiens OX=9606 GN=XPO1 PE=1 SV=1	ENSG00000082898	XPO1	0	4.59912	4.08317	0.142418	0.0757452	0.00519027	0.0953123	-0.515952	0.00519027	0.0942672	3.71118	3.65867	0.268323	0.502442	0.880865	0.968312	-0.0525152	0.880865	0.968558
+pH fractionation/SP	High	O14981		TATA-binding protein-associated factor 172 OS=Homo sapiens OX=9606 GN=BTAF1 PE=1 SV=2	ENSG00000095564	BTAF1	0	0.567526	0.556306	0.497139	0.261013	0.974049	0.988446	-0.0112199	0.974049	0.987543	0.0640586	-0.15348	0.421786	0.539946	0.611632	0.879356	-0.217539	0.611632	0.882426
+pH fractionation/SP	High	O15015-2		Isoform 2 of Zinc finger protein 646 OS=Homo sapiens OX=9606 GN=ZNF646	ENSG00000167395	ZNF646	0	-4.66877	-3.73091	0.159994	0.765671	0.106417	0.337871	0.937865	0.106417	0.345787	-0.989485	-0.463319	1.14792	0.652494	0.528026	0.847691	0.526166	0.528026	0.848238
+pH fractionation/SP	High	O15027-5		Isoform 5 of Protein transport protein Sec16A OS=Homo sapiens OX=9606 GN=SEC16A		SEC16A	0	0.929283	0.954571	0.624949	0.505753	0.959164	0.98205	0.0252886	0.959164	0.981581	1.87811	0.7842	1.47105	2.27373	0.5227	0.84358	-1.09391	0.5227	0.844463
+pH fractionation/SP	High	O15042		U2 snRNP-associated SURP motif-containing protein OS=Homo sapiens OX=9606 GN=U2SURP PE=1 SV=2	ENSG00000163714	U2SURP	0	2.66222	2.09136	0.135087	0.320383	0.0466919	0.222918	-0.570857	0.0466919	0.232214	4.56719	4.22948	0.134953	0.221712	0.0872943	0.485872	-0.337714	0.0872943	0.49119
+pH fractionation/SP	High	O15047		Histone-lysine N-methyltransferase SETD1A OS=Homo sapiens OX=9606 GN=SETD1A PE=1 SV=3	ENSG00000099381	SETD1A	0.005	-5.35861	-4.73995	1.81554	1.99591	0.711535	0.846993	0.618667	0.711535	0.844732	-4.48854	-4.33411	1.86246	1.97374	0.943186	0.984423	0.1947	0.903432	0.972777
+pH fractionation/SP	High	O15067		Phosphoribosylformylglycinamidine synthase OS=Homo sapiens OX=9606 GN=PFAS PE=1 SV=4	ENSG00000178921	PFAS	0	4.92156	3.72026	0.350912	0.544674	0.0325469	0.196508	-1.20131	0.0325469	0.203339	2.94432	2.6886	1.25349	0.836909	0.783478	0.936383	-0.255717	0.783478	0.940755
+pH fractionation/SP	High	O15078		Centrosomal protein of 290 kDa OS=Homo sapiens OX=9606 GN=CEP290 PE=1 SV=2	ENSG00000198707	CEP290	0	0.177628	-1.15633	2.31751	1.96306	0.489192	0.712011	-1.33395	0.489192	0.707348	-1.00133	-2.55673	1.2455	1.22111	0.197344	0.641887	-1.5554	0.197344	0.641902
+pH fractionation/SP	High	O15084		Serine/threonine-protein phosphatase 6 regulatory ankyrin repeat subunit A OS=Homo sapiens OX=9606 GN=ANKRD28 PE=1 SV=5	ENSG00000206560	ANKRD28	0	-0.587006	-0.824566	0.989382	0.687188	0.749862	0.870282	-0.237559	0.749862	0.867753	-1.53108	-0.795569	0.551403	0.447698	0.147328	0.574369	0.735516	0.147328	0.574992
+pH fractionation/SP	High	O15085-2		Isoform 2 of Rho guanine nucleotide exchange factor 11 OS=Homo sapiens OX=9606 GN=ARHGEF11	ENSG00000132694	ARHGEF11	0.004			N.D.	N.D.	N.D.	NA	0.263436	0.133448	0.383152	-4.05608	-4.80356	N.D.	1.54987	N.D.	NA	0.622305	0.654129	0.899598
+pH fractionation/SP	High	O15091		Mitochondrial ribonuclease P catalytic subunit OS=Homo sapiens OX=9606 GN=KIAA0391 PE=1 SV=2	ENSG00000100890	KIAA0391	0.001	-1.87831	-2.68003	0.957213	0.861523	0.341598	0.601436	-0.801718	0.341598	0.596327	-2.9846	-3.49063	1.76939	1.62627	0.733795	0.921826	-0.506029	0.733795	0.928386
+pH fractionation/SP	High	O15111		Inhibitor of nuclear factor kappa-B kinase subunit alpha OS=Homo sapiens OX=9606 GN=CHUK PE=1 SV=2	ENSG00000213341	CHUK	0	-0.240919	0.210981	0.675765	0.456853	0.391617	0.64157	0.4519	0.391617	0.635193	-3.11815	-1.42366	1.43346	0.880709	0.156016	0.588258	1.69448	0.156016	0.587967
+pH fractionation/SP	High	O15116		U6 snRNA-associated Sm-like protein LSm1 OS=Homo sapiens OX=9606 GN=LSM1 PE=1 SV=1	ENSG00000175324	LSM1	0.005	-3.11617	-2.01802	0.555137	1.37129	0.403967	0.648885	0.728525	0.688244	0.829618	-5.41426	-4.83186	N.D.	4.13024	N.D.	NA	1.03534	0.604363	0.879852
+pH fractionation/SP	High	O15117-3		Isoform 3 of FYN-binding protein 1 OS=Homo sapiens OX=9606 GN=FYB1	ENSG00000082074	FYB; FYB1	0	2.50769	3.11809	0.0428048	0.356589	0.0422307	0.213804	0.610403	0.0422307	0.222524	0.897563	1.21002	0.657483	0.345082	0.506476	0.836946	0.312461	0.506476	0.838968
+pH fractionation/SP	High	O15118		NPC intracellular cholesterol transporter 1 OS=Homo sapiens OX=9606 GN=NPC1 PE=1 SV=2	ENSG00000141458	NPC1	0.001	-1.59229	-2.09706	0.299735	0.423529	0.167264	0.4229	-0.504778	0.167264	0.426784	-5.01536	-5.86761	1.25885	N.D.	N.D.	NA	-1.27938	0.166881	0.604618
+pH fractionation/SP	High	O15121		Sphingolipid delta(4)-desaturase DES1 OS=Homo sapiens OX=9606 GN=DEGS1 PE=1 SV=1	ENSG00000143753	DEGS1	0.002	-3.22116	-4.01473	0.336442	1.2244	0.339942	0.599931	-0.793561	0.339942	0.594905	-6.77597	-4.2428	N.D.	N.D.	N.D.	NA	0.951514	0.284412	0.707762
+pH fractionation/SP	High	O15126		Secretory carrier-associated membrane protein 1 OS=Homo sapiens OX=9606 GN=SCAMP1 PE=1 SV=2	ENSG00000085365	SCAMP1	0	1.65074	1.00036	0.185957	0.876063	0.276877	0.539171	-0.650377	0.276877	0.538104	-0.701349	-1.09317	1.4388	2.63813	0.832395	0.951777	-0.391818	0.832395	0.955278
+pH fractionation/SP	High	O15127		Secretory carrier-associated membrane protein 2 OS=Homo sapiens OX=9606 GN=SCAMP2 PE=1 SV=2	ENSG00000140497	SCAMP2	0.001	-0.522073	0.63006	1.02185	0.521273	0.156911	0.40829	1.15213	0.156911	0.413505	-1.94297	-2.40686	0.598136	0.798915	0.465905	0.823472	-0.463889	0.465905	0.827652
+pH fractionation/SP	High	O15143		Actin-related protein 2/3 complex subunit 1B OS=Homo sapiens OX=9606 GN=ARPC1B PE=1 SV=3	ENSG00000130429	ARPC1B	0	4.02073	4.72018	0.195701	0.509152	0.0905131	0.310941	0.699446	0.0905131	0.320677	3.53288	4.79765	0.627858	0.79724	0.0970283	0.504603	1.26477	0.0970283	0.508913
+pH fractionation/SP	High	O15144		Actin-related protein 2/3 complex subunit 2 OS=Homo sapiens OX=9606 GN=ARPC2 PE=1 SV=1	ENSG00000163466	ARPC2	0	4.20375	4.95138	0.129279	0.292989	0.0155575	0.147226	0.747633	0.0155575	0.150146	3.67991	4.78213	0.400238	0.704188	0.0779191	0.472804	1.10223	0.0779191	0.481621
+pH fractionation/SP	High	O15145		Actin-related protein 2/3 complex subunit 3 OS=Homo sapiens OX=9606 GN=ARPC3 PE=1 SV=3	ENSG00000111229	ARPC3	0	-0.309021	0.905801	0.164577	0.41551	0.0092526	0.116408	1.21482	0.0092526	0.115331	-0.536373	0.963078	0.365232	0.207536	0.00347783	0.173362	1.49945	0.00347783	0.172706
+pH fractionation/SP	High	O15155		BET1 homolog OS=Homo sapiens OX=9606 GN=BET1 PE=1 SV=1	ENSG00000105829	BET1	0.007	-4.85612	-3.68923	3.28475	2.21964	0.696187	0.837725	0.378777	0.874189	0.938769	-4.09176	-4.88575	N.D.	1.67545	N.D.	NA	0.929412	0.51493	0.840658
+pH fractionation/SP	High	O15160		DNA-directed RNA polymerases I and III subunit RPAC1 OS=Homo sapiens OX=9606 GN=POLR1C PE=1 SV=1	ENSG00000171453	POLR1C	0	0.786361	0.657573	0.188639	0.34248	0.59885	0.781379	-0.128788	0.59885	0.778602	2.31428	1.6097	0.403493	0.17161	0.0496528	0.420376	-0.704586	0.0496528	0.430409
+pH fractionation/SP	High	O15162		Phospholipid scramblase 1 OS=Homo sapiens OX=9606 GN=PLSCR1 PE=1 SV=1	ENSG00000188313	PLSCR1	0.005	-4.21958	-2.96797	0.136785	0.114718	0.00181443	0.0645938	0.262997	0.804186	0.898553		-4.02528	N.D.	N.D.	N.D.	NA	1.13636	0.23704	0.673146
+pH fractionation/SP	High	O15164		Transcription intermediary factor 1-alpha OS=Homo sapiens OX=9606 GN=TRIM24 PE=1 SV=3	ENSG00000122779	TRIM24	0	-3.48983	-1.89727	0.82046	1.54036	0.18914	0.448229	1.59256	0.18914	0.452012	0.491176	-0.46451	0.582511	0.669007	0.135452	0.558795	-0.955686	0.135452	0.559897
+pH fractionation/SP	High	O15173-2		Isoform 2 of Membrane-associated progesterone receptor component 2 OS=Homo sapiens OX=9606 GN=PGRMC2	ENSG00000164040	PGRMC2	0	0.968545	1.05687	0.344708	0.588116	0.833429	0.917211	0.0883257	0.833429	0.916432	-1.64498	-1.25738	0.56013	0.488796	0.417559	0.797376	0.387605	0.417559	0.805404
+pH fractionation/SP	High	O15182		Centrin-3 OS=Homo sapiens OX=9606 GN=CETN3 PE=1 SV=2	ENSG00000153140	CETN3	0	-3.31689	-2.88234	1.53119	0.970013	0.751179	0.871599	-0.672236	0.671356	0.821452	-0.580472	-0.662479	1.66754	0.529293	0.952718	0.986727	-2.01393	0.405763	0.797645
+pH fractionation/SP	High	O15213		WD repeat-containing protein 46 OS=Homo sapiens OX=9606 GN=WDR46 PE=1 SV=3	ENSG00000227057	WDR46	0	-0.242273	-0.189816	1.15294	0.847164	0.952411	0.979085	0.052457	0.952411	0.978187	4.05525	3.10788	0.0893444	0.385177	0.014261	0.263037	-0.947372	0.014261	0.272838
+pH fractionation/SP	High	O15226-2		Isoform 2 of NF-kappa-B-repressing factor OS=Homo sapiens OX=9606 GN=NKRF	ENSG00000186416	NKRF	0	-1.12843	-0.418882	0.0783607	1.15825	0.34946	0.606539	0.709544	0.34946	0.601955	4.32248	4.6134	0.569178	1.0605	0.696966	0.911794	0.290924	0.696966	0.918012
+pH fractionation/SP	High	O15228		Dihydroxyacetone phosphate acyltransferase OS=Homo sapiens OX=9606 GN=GNPAT PE=1 SV=1	ENSG00000116906	GNPAT	0	0.841317	-0.503812	0.218537	0.360415	0.00523284	0.0953123	-1.34513	0.00523284	0.0942672	-0.21855	-1.06263	0.910431	0.498907	0.231834	0.667758	-0.844076	0.231834	0.667399
+pH fractionation/SP	High	O15234		Protein CASC3 OS=Homo sapiens OX=9606 GN=CASC3 PE=1 SV=2	ENSG00000108349	CASC3	0.001	-2.47409	-2.17688	1.21088	0.488819	0.713539	0.847634	0.297202	0.713539	0.845452	-0.757891	-0.550031	1.24353	0.814892	0.820568	0.948615	0.20786	0.820568	0.952031
+pH fractionation/SP	High	O15254		Peroxisomal acyl-coenzyme A oxidase 3 OS=Homo sapiens OX=9606 GN=ACOX3 PE=1 SV=2	ENSG00000087008	ACOX3	0.002	-3.43172	-4.25626	0.222772	0.963638	0.222243	0.483578	-0.824548	0.222243	0.486613	-4.01663	-3.24608	1.46594	1.66277	0.62054	0.882058	-0.259962	0.870516	0.964679
+pH fractionation/SP	High	O15258		Protein RER1 OS=Homo sapiens OX=9606 GN=RER1 PE=1 SV=1	ENSG00000157916	RER1	0	0.659555	1.20307	0.547361	0.43561	0.249609	0.510911	0.543513	0.249609	0.512729	-1.8445	-1.3239	1.06114	0.359325	0.466021	0.823472	0.520597	0.466021	0.827652
+pH fractionation/SP	High	O15260		Surfeit locus protein 4 OS=Homo sapiens OX=9606 GN=SURF4 PE=1 SV=3	ENSG00000280951	SURF4	0	1.66613	2.40404	0.380788	0.127583	0.0334526	0.198509	0.737912	0.0334526	0.205275	-0.834781	0.579059	0.0990614	0.733458	0.0296899	0.339898	1.41384	0.0296899	0.352903
+pH fractionation/SP	High	O15269		Serine palmitoyltransferase 1 OS=Homo sapiens OX=9606 GN=SPTLC1 PE=1 SV=1	ENSG00000090054	SPTLC1	0	0.655335	0.159193	0.26133	0.189239	0.0561928	0.243739	-0.496142	0.0561928	0.254532	-0.845756	-0.929193	3.57818	0.567211	0.970092	0.992325	-0.0834374	0.970092	0.991668
+pH fractionation/SP	High	O15270		Serine palmitoyltransferase 2 OS=Homo sapiens OX=9606 GN=SPTLC2 PE=1 SV=1	ENSG00000100596	SPTLC2	0.001	-2.33955	-1.80991	0.112891	0.356092	0.070012	0.271431	0.529638	0.070012	0.283169	-3.08219	-5.4348	0.614667	1.71997	0.21011	0.655829	-1.48479	0.370202	0.772838
+pH fractionation/SP	High	O15294		UDP-N-acetylglucosamine--peptide N-acetylglucosaminyltransferase 110 kDa subunit OS=Homo sapiens OX=9606 GN=OGT PE=1 SV=3	ENSG00000147162	OGT	0	1.29072	0.9251	0.477661	0.748613	0.515164	0.729702	-0.365619	0.515164	0.72525	0.61094	0.871364	0.419544	0.639825	0.587184	0.8706	0.260424	0.587184	0.872463
+pH fractionation/SP	High	O15297		Protein phosphatase 1D OS=Homo sapiens OX=9606 GN=PPM1D PE=1 SV=1	ENSG00000170836	PPM1D	0.001	-4.55427	-5.33176	0.646418	N.D.	N.D.	NA	-1.31347	0.0460451	0.231946	-1.58198	-2.48777	0.160193	0.101791	0.00116881	0.112831	-0.905784	0.00116881	0.110795
+pH fractionation/SP	High	O15304		Apoptosis regulatory protein Siva OS=Homo sapiens OX=9606 GN=SIVA1 PE=1 SV=2	ENSG00000184990	SIVA1	0.003	-2.94824	-5.58831	0.266019	0.336602	0.00217721	0.0721631	-2.78791	0.000389271	0.0354238	-6.82503	-7.42921	N.D.	N.D.	N.D.	NA	0.0729388	0.851463	0.96015
+pH fractionation/SP	High	O15305		Phosphomannomutase 2 OS=Homo sapiens OX=9606 GN=PMM2 PE=1 SV=1	ENSG00000140650	PMM2	0	1.53182	0.755412	0.629964	0.207445	0.11252	0.346161	-0.776412	0.11252	0.35297	-2.40158	-1.38206	1.62835	0.315585	0.347041	0.751865	1.01951	0.347041	0.754385
+pH fractionation/SP	High	O15347		High mobility group protein B3 OS=Homo sapiens OX=9606 GN=HMGB3 PE=1 SV=4	ENSG00000029993	HMGB3	0	2.34268	1.79905	0.0961364	0.581626	0.185456	0.445271	-0.543626	0.185456	0.449353	2.26516	1.79915	0.727747	0.480152	0.40696	0.790597	-0.466014	0.40696	0.798025
+pH fractionation/SP	High	O15355		Protein phosphatase 1G OS=Homo sapiens OX=9606 GN=PPM1G PE=1 SV=1	ENSG00000115241	PPM1G	0	3.90159	2.9982	0.112716	0.303882	0.00847529	0.112655	-0.903394	0.00847529	0.111325	1.14206	1.18364	0.221341	0.488631	0.899694	0.973397	0.0415759	0.899694	0.972185
+pH fractionation/SP	High	O15371		Eukaryotic translation initiation factor 3 subunit D OS=Homo sapiens OX=9606 GN=EIF3D PE=1 SV=1	ENSG00000100353	EIF3D	0	4.00157	3.14218	0.224963	0.308731	0.0175919	0.150193	-0.859386	0.0175919	0.154873	2.93168	2.65704	0.328723	0.18102	0.273712	0.705527	-0.274638	0.273712	0.701771
+pH fractionation/SP	High	O15372		Eukaryotic translation initiation factor 3 subunit H OS=Homo sapiens OX=9606 GN=EIF3H PE=1 SV=1	ENSG00000147677	EIF3H	0	3.77202	2.52627	0.257206	0.437121	0.0131128	0.137758	-1.24575	0.0131128	0.139322	1.9833	1.41855	0.395142	0.623888	0.255926	0.695234	-0.564751	0.255926	0.691514
+pH fractionation/SP	High	O15379-2		Isoform 2 of Histone deacetylase 3 OS=Homo sapiens OX=9606 GN=HDAC3		HDAC3	0	-1.59259	-2.10009	0.279559	0.536385	0.219818	0.482785	-0.507501	0.219818	0.485756	-2.6777	-2.57045	0.660324	0.701723	0.856518	0.959693	0.10725	0.856518	0.960471
+pH fractionation/SP	High	O15381		Nuclear valosin-containing protein-like OS=Homo sapiens OX=9606 GN=NVL PE=1 SV=1	ENSG00000143748	NVL	0	-0.323366	-0.00904894	0.430684	0.551038	0.479797	0.70755	0.314317	0.479797	0.702286	3.48416	3.07413	0.0658447	0.163024	0.0156131	0.270898	-0.410026	0.0156131	0.280452
+pH fractionation/SP	High	O15382		Branched-chain-amino-acid aminotransferase, mitochondrial OS=Homo sapiens OX=9606 GN=BCAT2 PE=1 SV=2	ENSG00000105552	BCAT2	0	2.2379	2.12748	0.725863	1.21675	0.899146	0.955404	-0.110416	0.899146	0.954085	-1.62672	-1.26983	0.349207	0.449529	0.338571	0.746527	0.356888	0.338571	0.74892
+pH fractionation/SP	High	O15392		Baculoviral IAP repeat-containing protein 5 OS=Homo sapiens OX=9606 GN=BIRC5 PE=1 SV=3		BIRC5	0.001	-4.70009	-3.99286	0.378978	0.948025	0.296423	0.558014	0.707226	0.296423	0.557071	-1.55584	-5.00857	0.554917	1.14774	0.00937083	0.235074	-3.45273	0.00937083	0.242171
+pH fractionation/SP	High	O15397		Importin-8 OS=Homo sapiens OX=9606 GN=IPO8 PE=1 SV=2	ENSG00000133704	IPO8	0	0.747507	0.453992	0.273502	0.221587	0.222163	0.483578	-0.293515	0.222163	0.486613	-0.966653	-0.712732	0.719102	0.234553	0.592127	0.873162	0.253921	0.592127	0.874955
+pH fractionation/SP	High	O15400		Syntaxin-7 OS=Homo sapiens OX=9606 GN=STX7 PE=1 SV=4	ENSG00000079950	STX7	0.005	-3.78462	-3.09526	0.3821	0.643901	0.18601	0.445271	0.689358	0.18601	0.449353			N.D.	N.D.	N.D.	NA	0.267541	0.245163	0.682963
+pH fractionation/SP	High	O15417		Trinucleotide repeat-containing gene 18 protein OS=Homo sapiens OX=9606 GN=TNRC18 PE=1 SV=3	ENSG00000182095	TNRC18	0.008	-4.15532		N.D.	N.D.	N.D.	NA	-0.518305	0.501732	0.716181	-4.57697	-3.5323	1.22348	0.288293	0.221891	0.667599	1.78165	0.120566	0.543271
+pH fractionation/SP	High	O15439		Multidrug resistance-associated protein 4 OS=Homo sapiens OX=9606 GN=ABCC4 PE=1 SV=3	ENSG00000125257	ABCC4	0.001	-2.41184	-3.45684	0.172332	0.418181	0.0161061	0.147226	-1.04501	0.0161061	0.151273	-5.32843	-5.10895	0.525551	0.628162	0.713653	0.915269	0.602901	0.349617	0.755618
+pH fractionation/SP	High	O15446		DNA-directed RNA polymerase I subunit RPA34 OS=Homo sapiens OX=9606 GN=CD3EAP PE=1 SV=1	ENSG00000117877	CD3EAP	0	-2.87345	-3.0152	1.29434	0.252012	0.861356	0.933411	-0.141751	0.861356	0.93212	2.30303	1.07051	0.407878	0.193395	0.00910939	0.232447	-1.23252	0.00910939	0.240436
+pH fractionation/SP	High	O15498		Synaptobrevin homolog YKT6 OS=Homo sapiens OX=9606 GN=YKT6 PE=1 SV=1	ENSG00000106636	YKT6	0	2.43828	2.28431	0.41919	0.267096	0.62004	0.795903	-0.153971	0.62004	0.793521	0.35381	0.0341142	0.621148	0.835021	0.62286	0.882872	-0.319695	0.62286	0.887377
+pH fractionation/SP	High	O15504		Nucleoporin-like protein 2 OS=Homo sapiens OX=9606 GN=NUPL2 PE=1 SV=1	ENSG00000136243	NUPL2	0	-2.25387	-1.79149	1.15907	0.325347	0.542287	0.746664	0.462382	0.542287	0.742569	0.715825	-0.281508	1.06901	1.25495	0.353844	0.755128	-0.997333	0.353844	0.75752
+pH fractionation/SP	High	O15511		Actin-related protein 2/3 complex subunit 5 OS=Homo sapiens OX=9606 GN=ARPC5 PE=1 SV=3	ENSG00000162704	ARPC5	0	2.17222	2.58499	0.0748814	0.276981	0.0673565	0.265602	0.412777	0.0673565	0.277213	1.46381	2.36401	0.793689	0.304291	0.140524	0.565504	0.900201	0.140524	0.565964
+pH fractionation/SP	High	O15523		ATP-dependent RNA helicase DDX3Y OS=Homo sapiens OX=9606 GN=DDX3Y PE=1 SV=2	ENSG00000067048	DDX3Y	0	-2.18644	-2.03677	0.316125	1.30801	0.856623	0.931853	0.14967	0.856623	0.930946	0.214617	0.784831	0.68431	0.307671	0.258421	0.695716	0.570215	0.258421	0.691754
+pH fractionation/SP	High	O15525		Transcription factor MafG OS=Homo sapiens OX=9606 GN=MAFG PE=1 SV=1	ENSG00000197063	MAFG	0.001		-6.6769	N.D.	N.D.	N.D.	NA	0.00807877	0.977085	0.98917	-3.84935	-3.21638	0.998807	0.512306	0.482559	0.831589	-0.494986	0.71948	0.922606
+pH fractionation/SP	High	O15530		3-phosphoinositide-dependent protein kinase 1 OS=Homo sapiens OX=9606 GN=PDPK1 PE=1 SV=1	ENSG00000140992	PDPK1	0	-1.73645	-0.923733	0.294543	0.305452	0.0294507	0.186975	0.812716	0.0294507	0.193279	-2.56598	-2.56402	0.898728	0.554462	0.997593	0.999797	0.00195668	0.997593	0.999828
+pH fractionation/SP	High	O15533-3		Isoform 3 of Tapasin OS=Homo sapiens OX=9606 GN=TAPBP	ENSG00000236490	TAPBP	0	-0.13909	1.60296	0.355384	0.721704	0.0199341	0.158615	1.74205	0.0199341	0.164448	0.0505239	0.307291	0.843327	0.246062	0.639311	0.888756	0.256767	0.639311	0.894762
+pH fractionation/SP	High	O15541		RING finger protein 113A OS=Homo sapiens OX=9606 GN=RNF113A PE=1 SV=1	ENSG00000125352	RNF113A	0	-1.99477	-1.01766	0.102938	0.325911	0.00775188	0.110461	0.977102	0.00775188	0.109402	-1.34748	-0.866039	0.269422	0.630497	0.290773	0.711322	0.48144	0.290773	0.710361
+pH fractionation/SP	High	O43143		Pre-mRNA-splicing factor ATP-dependent RNA helicase DHX15 OS=Homo sapiens OX=9606 GN=DHX15 PE=1 SV=2	ENSG00000109606	DHX15	0	5.38372	5.07005	0.0953551	0.0830507	0.012681	0.135132	-0.313672	0.012681	0.136194	6.63854	6.004	0.184443	0.305245	0.0368711	0.376437	-0.634542	0.0368711	0.387699
+pH fractionation/SP	High	O43148-2		Isoform 2 of mRNA cap guanine-N7 methyltransferase OS=Homo sapiens OX=9606 GN=RNMT	ENSG00000101654	RNMT	0	1.52352	1.23319	0.241847	0.651453	0.509336	0.72508	-0.290327	0.509336	0.72081	1.73833	1.4957	0.378538	0.726324	0.63492	0.887018	-0.242633	0.63492	0.892127
+pH fractionation/SP	High	O43156		TELO2-interacting protein 1 homolog OS=Homo sapiens OX=9606 GN=TTI1 PE=1 SV=3	ENSG00000101407	TTI1	0	-0.0875451	-0.510251	0.186737	1.39467	0.630313	0.800902	-0.422706	0.630313	0.798688	0.891745	0.329478	0.870985	0.795224	0.455358	0.819245	-0.562266	0.455358	0.822957
+pH fractionation/SP	High	O43159		Ribosomal RNA-processing protein 8 OS=Homo sapiens OX=9606 GN=RRP8 PE=1 SV=2	ENSG00000132275	RRP8	0	-0.56415	-0.280388	0.267346	0.883104	0.622476	0.797222	0.283762	0.622476	0.794973	2.9998	2.58471	0.116478	0.291158	0.0836104	0.4826	-0.415095	0.0836104	0.48838
+pH fractionation/SP	High	O43164		E3 ubiquitin-protein ligase Praja-2 OS=Homo sapiens OX=9606 GN=PJA2 PE=1 SV=4	ENSG00000198961	PJA2	0.005	-3.49265	-4.37002	0.178402	1.27864	0.43792	0.673851	-0.457681	0.72991	0.855486	-4.07101	-4.02765	N.D.	0.160787	N.D.	NA	1.19598	0.396817	0.79071
+pH fractionation/SP	High	O43166		Signal-induced proliferation-associated 1-like protein 1 OS=Homo sapiens OX=9606 GN=SIPA1L1 PE=1 SV=4	ENSG00000197555	SIPA1L1	0	-0.744758	-0.353308	1.36615	1.58091	0.761821	0.878013	0.39145	0.761821	0.875658	1.21563	1.55051	0.884676	0.675093	0.62974	0.884655	0.334881	0.62974	0.89022
+pH fractionation/SP	High	O43169		Cytochrome b5 type B OS=Homo sapiens OX=9606 GN=CYB5B PE=1 SV=2	ENSG00000103018	CYB5B	0	2.54022	2.28485	0.212173	0.204395	0.207667	0.470776	-0.25537	0.207667	0.473254	-0.431342	0.194346	0.460103	0.750653	0.285793	0.709704	0.625689	0.285793	0.707762
+pH fractionation/SP	High	O43172		U4/U6 small nuclear ribonucleoprotein Prp4 OS=Homo sapiens OX=9606 GN=PRPF4 PE=1 SV=2	ENSG00000136875	PRPF4	0	2.10691	1.26017	0.0465939	0.282469	0.00687247	0.105644	-0.846745	0.00687247	0.104592	4.19987	3.83213	0.171089	0.297247	0.136849	0.560134	-0.367741	0.136849	0.560623
+pH fractionation/SP	High	O43175		D-3-phosphoglycerate dehydrogenase OS=Homo sapiens OX=9606 GN=PHGDH PE=1 SV=4	ENSG00000092621	PHGDH	0	5.92459	5.67034	0.0773115	0.358102	0.295631	0.557383	-0.254255	0.295631	0.556604	3.90002	4.4973	0.246952	0.568274	0.170317	0.612817	0.597281	0.170317	0.612534
+pH fractionation/SP	High	O43181		NADH dehydrogenase [ubiquinone] iron-sulfur protein 4, mitochondrial OS=Homo sapiens OX=9606 GN=NDUFS4 PE=1 SV=1	ENSG00000164258	NDUFS4	0.002	-1.54303	-1.46798	0.232003	0.386692	0.826001	0.913534	1.50482	0.358032	0.60735	-4.99132	-4.91874	0.77445	1.4446	0.942542	0.984423	0.0725875	0.942542	0.984433
+pH fractionation/SP	High	O43189		PHD finger protein 1 OS=Homo sapiens OX=9606 GN=PHF1 PE=1 SV=3	ENSG00000112511	PHF1	0.001	-3.03529	-3.69153	0.282906	1.26652	0.41769	0.659106	-1.49322	0.208667	0.474491	-2.15205	-2.20057	0.671097	1.57183	0.96314	0.989739	-0.0485195	0.96314	0.988937
+pH fractionation/SP	High	O43237		Cytoplasmic dynein 1 light intermediate chain 2 OS=Homo sapiens OX=9606 GN=DYNC1LI2 PE=1 SV=1	ENSG00000135720	DYNC1LI2	0.001	-2.10734	-2.96937	0.631356	1.38312	0.381688	0.632025	-0.862025	0.381688	0.625853	-4.93502	-4.90386	1.352	1.79769	0.982006	0.995057	0.0311615	0.982006	0.995769
+pH fractionation/SP	High	O43242		26S proteasome non-ATPase regulatory subunit 3 OS=Homo sapiens OX=9606 GN=PSMD3 PE=1 SV=2	ENSG00000108344	PSMD3	0	4.50566	4.28465	0.296824	0.280479	0.401653	0.6473	-0.221003	0.401653	0.641617	3.14689	3.44984	0.143214	0.152421	0.0661334	0.457989	0.302955	0.0661334	0.464479
+pH fractionation/SP	High	O43251-8		Isoform 8 of RNA binding protein fox-1 homolog 2 OS=Homo sapiens OX=9606 GN=RBFOX2	ENSG00000100320	RBFOX2	0	-4.26703	-3.42957	1.03611	N.D.	N.D.	NA	-0.181997	0.882305	0.944037	-0.725275	-0.230237	0.383316	0.470021	0.230334	0.667758	0.495039	0.230334	0.667399
+pH fractionation/SP	High	O43252		Bifunctional 3'-phosphoadenosine 5'-phosphosulfate synthase 1 OS=Homo sapiens OX=9606 GN=PAPSS1 PE=1 SV=2	ENSG00000138801	PAPSS1	0	2.95362	3.3309	0.181056	0.0168569	0.0228861	0.170001	0.377284	0.0228861	0.175517	1.04375	1.25639	0.678466	0.403675	0.665125	0.89983	0.212637	0.665125	0.905278
+pH fractionation/SP	High	O43264		Centromere/kinetochore protein zw10 homolog OS=Homo sapiens OX=9606 GN=ZW10 PE=1 SV=3	ENSG00000086827	ZW10	0	0.889222	0.339733	0.0399208	0.510064	0.136363	0.381427	-0.549489	0.136363	0.386797	-1.90463	-0.570463	0.0566562	0.808251	0.0462986	0.410679	1.33417	0.0462986	0.422042
+pH fractionation/SP	High	O43290		U4/U6.U5 tri-snRNP-associated protein 1 OS=Homo sapiens OX=9606 GN=SART1 PE=1 SV=1	ENSG00000175467	SART1	0	2.64676	2.26101	0.330751	0.357624	0.242096	0.502815	-0.385748	0.242096	0.504991	5.08135	4.59586	0.272101	0.339671	0.12551	0.5446	-0.48549	0.12551	0.54796
+pH fractionation/SP	High	O43292		Glycosylphosphatidylinositol anchor attachment 1 protein OS=Homo sapiens OX=9606 GN=GPAA1 PE=1 SV=3	ENSG00000197858	GPAA1	0	0.200722	0.942942	0.385747	0.194718	0.0409367	0.213262	0.74222	0.0409367	0.222507	-1.89771	-1.40714	0.430815	0.681426	0.35135	0.754655	0.490576	0.35135	0.756287
+pH fractionation/SP	High	O43293		Death-associated protein kinase 3 OS=Homo sapiens OX=9606 GN=DAPK3 PE=1 SV=1	ENSG00000167657	DAPK3	0	-2.87372	-1.73172	0.252862	0.217145	0.00404168	0.0891024	1.142	0.00404168	0.0881086	-0.759323	0.309395	0.393909	0.19332	0.0134929	0.255633	1.06872	0.0134929	0.267055
+pH fractionation/SP	High	O43303		Centriolar coiled-coil protein of 110 kDa OS=Homo sapiens OX=9606 GN=CCP110 PE=1 SV=3	ENSG00000103540	CCP110	0.001	-7.56834	-6.68314	3.62375	2.19698	0.735804	0.861294	0.885199	0.735804	0.859493	-3.06429	-5.74522	0.971956	2.43431	0.166395	0.603493	-2.93406	0.0660693	0.464479
+pH fractionation/SP	High	O43314		Inositol hexakisphosphate and diphosphoinositol-pentakisphosphate kinase 2 OS=Homo sapiens OX=9606 GN=PPIP5K2 PE=1 SV=3	ENSG00000145725	PPIP5K2	0	-0.170308	-0.0742666	0.146947	0.58953	0.797801	0.897526	0.0960409	0.797801	0.895319	-1.1845	-2.42383	1.54116	2.53529	0.509422	0.83851	-1.23933	0.509422	0.840328
+pH fractionation/SP	High	O43318		Mitogen-activated protein kinase kinase kinase 7 OS=Homo sapiens OX=9606 GN=MAP3K7 PE=1 SV=1	ENSG00000135341	MAP3K7	0.008	-5.33569	-4.56261	0.50427	0.126398	0.135966	0.381245	0.303833	0.612953	0.789382		-3.84283	N.D.	N.D.	N.D.	NA	1.20739	0.243503	0.680188
+pH fractionation/SP	High	O43324		Eukaryotic translation elongation factor 1 epsilon-1 OS=Homo sapiens OX=9606 GN=EEF1E1 PE=1 SV=1	ENSG00000124802	EEF1E1	0	1.2279	0.741862	0.272543	0.0555121	0.0389067	0.210201	-0.486038	0.0389067	0.218776	-1.84645	-1.14706	0.277702	0.450945	0.0840998	0.482689	0.699391	0.0840998	0.48838
+pH fractionation/SP	High	O43379-4		Isoform 4 of WD repeat-containing protein 62 OS=Homo sapiens OX=9606 GN=WDR62	ENSG00000075702	WDR62	0	-1.34182	-4.8103	0.418988	0.466646	0.000663604	0.0424239	-3.46848	0.000663604	0.041953	-3.22823	-3.65698	2.69942	2.15943	0.840416	0.953105	-0.428744	0.840416	0.956532
+pH fractionation/SP	High	O43390		Heterogeneous nuclear ribonucleoprotein R OS=Homo sapiens OX=9606 GN=HNRNPR PE=1 SV=1	ENSG00000282958	HNRNPR	0	4.4064	4.17967	0.0931934	0.122444	0.0631648	0.255786	-0.226727	0.0631648	0.267034	8.07348	8.06392	0.155656	0.175889	0.947168	0.9853	-0.0095623	0.947168	0.985188
+pH fractionation/SP	High	O43390-2		Isoform 2 of Heterogeneous nuclear ribonucleoprotein R OS=Homo sapiens OX=9606 GN=HNRNPR	ENSG00000282958	HNRNPR	0	-6.3027	-6.04325	N.D.	N.D.	N.D.	NA	0.232806	0.195129	0.458467	-1.1975	-2.33764	0.0887432	1.45891	0.38494	0.7769	-0.734003	0.763144	0.935369
+pH fractionation/SP	High	O43395		U4/U6 small nuclear ribonucleoprotein Prp3 OS=Homo sapiens OX=9606 GN=PRPF3 PE=1 SV=2	ENSG00000117360	PRPF3	0	1.84904	0.855103	0.241868	0.572666	0.050365	0.229956	-0.993941	0.050365	0.239918	4.33095	4.10089	0.249727	0.184881	0.268972	0.701956	-0.230055	0.268972	0.696636
+pH fractionation/SP	High	O43396		Thioredoxin-like protein 1 OS=Homo sapiens OX=9606 GN=TXNL1 PE=1 SV=3	ENSG00000091164	TXNL1	0	3.42735	3.08781	0.356281	0.290592	0.270013	0.533092	-0.339537	0.270013	0.532604	1.17018	1.32515	0.17343	0.127512	0.280445	0.709002	0.154972	0.280445	0.70676
+pH fractionation/SP	High	O43399-7		Isoform 7 of Tumor protein D54 OS=Homo sapiens OX=9606 GN=TPD52L2	ENSG00000101150	TPD52L2	0	1.4823	0.551486	0.368138	0.753065	0.126781	0.368779	-0.930815	0.126781	0.37432	-1.68462	-2.36528	0.807734	1.58589	0.543925	0.856135	-0.680651	0.543925	0.85634
+pH fractionation/SP	High	O43402		ER membrane protein complex subunit 8 OS=Homo sapiens OX=9606 GN=EMC8 PE=1 SV=1	ENSG00000131148	EMC8	0	-0.637971	-1.39773	0.545614	1.61521	0.483261	0.709176	-0.759758	0.483261	0.703937	0.496414	-1.17085	0.72358	3.17092	0.424769	0.804616	-1.66726	0.424769	0.810874
+pH fractionation/SP	High	O43414		ERI1 exoribonuclease 3 OS=Homo sapiens OX=9606 GN=ERI3 PE=1 SV=2	ENSG00000117419	ERI3	0.001	-0.278784	-0.795721	0.131941	0.602872	0.220448	0.482897	-0.516937	0.220448	0.485756	-0.911601	-2.12702	0.321462	0.401736	0.0149566	0.268676	-1.21542	0.0149566	0.278904
+pH fractionation/SP	High	O43422		52 kDa repressor of the inhibitor of the protein kinase OS=Homo sapiens OX=9606 GN=THAP12 PE=1 SV=2	ENSG00000137492	PRKRIR; THAP12	0.002	-3.1536	-2.64176	0.260524	N.D.	N.D.	NA	-1.8235	0.19642	0.45906	-3.94675	-4.40917	1.23123	0.150504	0.533131	0.850155	0.475769	0.678996	0.910839
+pH fractionation/SP	High	O43427		Acidic fibroblast growth factor intracellular-binding protein OS=Homo sapiens OX=9606 GN=FIBP PE=1 SV=3	ENSG00000172500	FIBP	0	0.521823	0.632823	0.675121	0.927481	0.875036	0.940776	0.111	0.875036	0.939005	1.35206	1.53495	1.23819	0.708498	0.835144	0.952336	0.182895	0.835144	0.955663
+pH fractionation/SP	High	O43432-3		Isoform 3 of Eukaryotic translation initiation factor 4 gamma 3 OS=Homo sapiens OX=9606 GN=EIF4G3	ENSG00000075151	EIF4G3	0	-3.04545	-2.95758	1.42746	1.14979	0.937816	0.972732	0.0878671	0.937816	0.972467	-4.82777	-5.23047	1.29274	1.45516	0.738197	0.921853	-0.402703	0.738197	0.9285
+pH fractionation/SP	High	O43447		Peptidyl-prolyl cis-trans isomerase H OS=Homo sapiens OX=9606 GN=PPIH PE=1 SV=1	ENSG00000171960	PPIH	0	2.56484	1.83862	0.687323	0.678827	0.262806	0.526145	-0.726222	0.262806	0.526427	2.82528	2.41125	0.176481	0.128361	0.030325	0.342945	-0.414029	0.030325	0.356319
+pH fractionation/SP	High	O43463-2		Isoform 2 of Histone-lysine N-methyltransferase SUV39H1 OS=Homo sapiens OX=9606 GN=SUV39H1	ENSG00000101945	SUV39H1	0	-1.75863	-1.2326	0.351933	0.253962	0.103725	0.33268	0.526039	0.103725	0.340757	-0.169226	-1.88874	0.443218	0.105728	0.0028309	0.160464	-1.71951	0.0028309	0.157638
+pH fractionation/SP	High	O43464		Serine protease HTRA2, mitochondrial OS=Homo sapiens OX=9606 GN=HTRA2 PE=1 SV=2	ENSG00000115317	HTRA2	0.007	-3.24181	-3.34549	0.235385	0.624734	0.801241	0.899774	-0.103681	0.801241	0.897277	-4.04867	-5.10575	0.962829	0.500565	0.260757	0.697679	-1.54872	0.114534	0.536648
+pH fractionation/SP	High	O43482		Protein Mis18-beta OS=Homo sapiens OX=9606 GN=OIP5 PE=1 SV=2	ENSG00000104147	OIP5	0.003	-3.64801	-8.23294	0.45669	1.21412	0.00798684	0.110461	-3.85944	0.0136172	0.141791	-2.16286	-3.77677	0.683452	0.93844	0.107623	0.520432	-2.54355	0.078102	0.481621
+pH fractionation/SP	High	O43488		Aflatoxin B1 aldehyde reductase member 2 OS=Homo sapiens OX=9606 GN=AKR7A2 PE=1 SV=3	ENSG00000053371	AKR7A2	0	2.41707	2.17667	0.159221	0.587518	0.531532	0.740447	-0.240393	0.531532	0.735757	0.270447	0.561474	0.858085	0.889881	0.704331	0.911914	0.291027	0.704331	0.918853
+pH fractionation/SP	High	O43491		Band 4.1-like protein 2 OS=Homo sapiens OX=9606 GN=EPB41L2 PE=1 SV=1	ENSG00000079819	EPB41L2	0	2.41871	1.96375	0.386269	0.203572	0.145433	0.394397	-0.454955	0.145433	0.399672	2.27593	1.62503	0.563887	0.323045	0.157794	0.590399	-0.650899	0.157794	0.590411
+pH fractionation/SP	High	O43491-4		Isoform 4 of Band 4.1-like protein 2 OS=Homo sapiens OX=9606 GN=EPB41L2	ENSG00000079819	EPB41L2	0	-1.88799	-1.47808	0.756695	0.125987	0.522588	0.735048	-1.07043	0.526365	0.73356	-3.66703	-4.05157	0.824104	0.665582	0.624496	0.883268	-1.17702	0.288907	0.708168
+pH fractionation/SP	High	O43504		Ragulator complex protein LAMTOR5 OS=Homo sapiens OX=9606 GN=LAMTOR5 PE=1 SV=1	ENSG00000134248	LAMTOR5	0.001	-0.531963	-0.702155	0.371614	0.747778	0.741891	0.865288	-0.170192	0.741891	0.862922	-1.92491	-2.11663	1.33717	0.382424	0.82302	0.949701	-0.191722	0.82302	0.952843
+pH fractionation/SP	High	O43561-3		Isoform 3 of Linker for activation of T-cells family member 1 OS=Homo sapiens OX=9606 GN=LAT	ENSG00000213658	LAT	0	-4.06591	0.865846	0.48389	0.809506	0.000823479	0.0488137	4.93175	0.000823479	0.049043	-3.71898	0.936641	0.387579	0.483917	0.000201663	0.0493331	4.65562	0.000201663	0.04696
+pH fractionation/SP	High	O43583		Density-regulated protein OS=Homo sapiens OX=9606 GN=DENR PE=1 SV=2	ENSG00000139726	DENR	0	1.29206	1.41966	0.469601	0.187339	0.684587	0.82901	0.127597	0.684587	0.826625	0.407693	0.225066	0.103121	0.92216	0.750336	0.924837	-0.182627	0.750336	0.93056
+pH fractionation/SP	High	O43592		Exportin-T OS=Homo sapiens OX=9606 GN=XPOT PE=1 SV=2	ENSG00000184575	XPOT	0	3.46128	2.97051	0.127465	0.131157	0.00967774	0.118927	-0.490768	0.00967774	0.117759	1.05316	2.14323	0.420111	0.333403	0.0244428	0.318236	1.09007	0.0244428	0.327802
+pH fractionation/SP	High	O43598		2'-deoxynucleoside 5'-phosphate N-hydrolase 1 OS=Homo sapiens OX=9606 GN=DNPH1 PE=1 SV=1	ENSG00000112667	C6orf108; DNPH1	0.001	-1.44734	-1.45402	0.483143	0.725968	0.990046	0.995015	-0.00668216	0.990046	0.994316	-2.70087	-3.35746	2.65705	2.14245	0.755727	0.927547	-0.656581	0.755727	0.932464
+pH fractionation/SP	High	O43615		Mitochondrial import inner membrane translocase subunit TIM44 OS=Homo sapiens OX=9606 GN=TIMM44 PE=1 SV=2	ENSG00000104980	TIMM44	0	3.50056	3.93558	0.257183	1.35527	0.613956	0.79234	0.435021	0.613956	0.789879	3.60059	1.55985	2.14482	0.248673	0.176964	0.619235	-2.04074	0.176964	0.618326
+pH fractionation/SP	High	O43617		Trafficking protein particle complex subunit 3 OS=Homo sapiens OX=9606 GN=TRAPPC3 PE=1 SV=1	ENSG00000054116	TRAPPC3	0.001	0.945516	0.399387	0.117873	0.319013	0.0497493	0.228506	-0.546129	0.0497493	0.238119	-1.99692	-1.69265	0.687114	0.569705	0.586644	0.8706	0.304267	0.586644	0.872463
+pH fractionation/SP	High	O43633		Charged multivesicular body protein 2a OS=Homo sapiens OX=9606 GN=CHMP2A PE=1 SV=1	ENSG00000130724	CHMP2A	0	0.939986	-1.88108	0.753876	2.85587	0.173414	0.432901	-2.82106	0.173414	0.43699	-2.16217	-3.62432	0.812047	3.24119	0.490692	0.833937	-1.46216	0.490692	0.834629
+pH fractionation/SP	High	O43639		Cytoplasmic protein NCK2 OS=Homo sapiens OX=9606 GN=NCK2 PE=1 SV=2	ENSG00000071051	NCK2	0.004	-3.89116	-4.183	0.248114	N.D.	N.D.	NA	-1.4939	0.073025	0.288663	-5.34213	-5.95996	N.D.	0.281677	N.D.	NA	0.101573	0.84462	0.957832
+pH fractionation/SP	High	O43660		Pleiotropic regulator 1 OS=Homo sapiens OX=9606 GN=PLRG1 PE=1 SV=1	ENSG00000171566	PLRG1	0	3.37637	2.15673	0.433205	1.13651	0.157418	0.408947	-1.21964	0.157418	0.414203	4.89265	4.71166	0.0738836	0.153344	0.139332	0.563635	-0.180985	0.139332	0.563377
+pH fractionation/SP	High	O43663		Protein regulator of cytokinesis 1 OS=Homo sapiens OX=9606 GN=PRC1 PE=1 SV=2	ENSG00000198901	PRC1	0	-2.66259	-1.8393	0.601633	0.391189	0.117846	0.354941	0.823285	0.117846	0.360508	1.23692	-0.808901	0.163788	0.321091	0.000600417	0.0930246	-2.04582	0.000600417	0.0904687
+pH fractionation/SP	High	O43665-3		Isoform 3 of Regulator of G-protein signaling 10 OS=Homo sapiens OX=9606 GN=RGS10	ENSG00000148908	RGS10	0.008	-1.58101	-3.06213	0.745319	0.618067	0.0570117	0.246401	-1.48112	0.0570117	0.257105	0.520886	4.14653	5.72508	0.609187	0.336691	0.744597	3.62564	0.336691	0.746793
+pH fractionation/SP	High	O43670-4		Isoform 4 of BUB3-interacting and GLEBS motif-containing protein ZNF207 OS=Homo sapiens OX=9606 GN=ZNF207	ENSG00000010244	ZNF207	0.001	0.394831	0.469145	0.148734	0.234072	0.666692	0.821078	0.074314	0.666692	0.818803	2.61938	2.16308	0.522578	0.41778	0.302929	0.721804	-0.456299	0.302929	0.722807
+pH fractionation/SP	High	O43676		NADH dehydrogenase [ubiquinone] 1 beta subcomplex subunit 3 OS=Homo sapiens OX=9606 GN=NDUFB3 PE=1 SV=3	ENSG00000119013	NDUFB3	0.001	-1.04124	-0.381439	0.11052	0.698361	0.181335	0.44104	0.659801	0.181335	0.44534	-2.5991	-1.56571	0.388797	1.78876	0.383541	0.776588	1.03339	0.383541	0.781417
+pH fractionation/SP	High	O43681		ATPase ASNA1 OS=Homo sapiens OX=9606 GN=ASNA1 PE=1 SV=2	ENSG00000198356	ASNA1	0	2.63737	3.17819	0.150937	0.563147	0.183405	0.444344	0.540815	0.183405	0.448771	1.17829	1.55789	0.676149	0.471094	0.469638	0.824661	0.379606	0.469638	0.828212
+pH fractionation/SP	High	O43684		Mitotic checkpoint protein BUB3 OS=Homo sapiens OX=9606 GN=BUB3 PE=1 SV=1	ENSG00000154473	BUB3	0	4.37236	3.94851	0.0964256	0.260532	0.0574227	0.246666	-0.423851	0.0574227	0.25719	4.88399	4.54808	0.327178	0.340342	0.285284	0.709704	-0.335913	0.285284	0.707762
+pH fractionation/SP	High	O43707		Alpha-actinin-4 OS=Homo sapiens OX=9606 GN=ACTN4 PE=1 SV=2	ENSG00000282844	ACTN4	0	4.39404	4.51704	0.27581	0.32997	0.64632	0.80912	0.122997	0.64632	0.807387	4.50745	5.27044	0.30645	0.381966	0.0541717	0.43013	0.762982	0.0541717	0.438251
+pH fractionation/SP	High	O43708		Maleylacetoacetate isomerase OS=Homo sapiens OX=9606 GN=GSTZ1 PE=1 SV=3		GSTZ1	0.001	-0.869129	-0.80021	0.240301	0.452191	0.827117	0.914032	0.068919	0.827117	0.912626	-3.84296	-2.81994	0.981982	0.845626	0.243319	0.681294	1.02302	0.243319	0.680046
+pH fractionation/SP	High	O43709-3		Isoform 3 of Probable 18S rRNA (guanine-N(7))-methyltransferase OS=Homo sapiens OX=9606 GN=BUD23	ENSG00000071462	WBSCR22; BUD23	0	-1.17844	-2.4256	0.319894	0.270808	0.00672632	0.104957	-1.24716	0.00672632	0.103792	0.651188	-1.3367	0.423226	0.659315	0.0117391	0.249391	-1.98789	0.0117391	0.259106
+pH fractionation/SP	High	O43719		HIV Tat-specific factor 1 OS=Homo sapiens OX=9606 GN=HTATSF1 PE=1 SV=1	ENSG00000102241	HTATSF1	0	5.15507	5.15936	0.318691	0.38042	0.988783	0.994369	0.00428553	0.988783	0.993827	3.08368	3.98762	0.761284	0.494465	0.159664	0.593696	0.903933	0.159664	0.594016
+pH fractionation/SP	High	O43736		Integral membrane protein 2A OS=Homo sapiens OX=9606 GN=ITM2A PE=1 SV=2	ENSG00000078596	ITM2A	0.001	-1.24921	-0.430395	0.301706	0.390952	0.0453829	0.221432	0.818811	0.0453829	0.230423	-2.01689	-1.14485	0.182516	0.395576	0.0256525	0.324328	0.872044	0.0256525	0.334241
+pH fractionation/SP	High	O43747-2		Isoform 2 of AP-1 complex subunit gamma-1 OS=Homo sapiens OX=9606 GN=AP1G1	ENSG00000166747	AP1G1	0	3.2109	3.16923	0.131435	0.218628	0.791267	0.894363	-0.0416699	0.791267	0.892452	2.82401	2.32392	0.545791	0.662864	0.370153	0.769512	-0.500087	0.370153	0.772838
+pH fractionation/SP	High	O43760-2		Isoform 2 of Synaptogyrin-2 OS=Homo sapiens OX=9606 GN=SYNGR2	ENSG00000108639	SYNGR2	0.001	1.74276	0.500521	0.327828	0.823294	0.0721345	0.276018	-1.24224	0.0721345	0.287807	-0.538175	-0.901259	0.238359	1.1517	0.621189	0.882473	-0.363084	0.621189	0.8865
+pH fractionation/SP	High	O43765		Small glutamine-rich tetratricopeptide repeat-containing protein alpha OS=Homo sapiens OX=9606 GN=SGTA PE=1 SV=1	ENSG00000104969	SGTA	0	2.01928	1.11091	0.422677	0.582532	0.0941064	0.317164	-0.908372	0.0941064	0.326189	0.0160686	0.169951	0.662714	0.620098	0.783616	0.936383	0.153882	0.783616	0.940755
+pH fractionation/SP	High	O43772		Mitochondrial carnitine/acylcarnitine carrier protein OS=Homo sapiens OX=9606 GN=SLC25A20 PE=1 SV=1	ENSG00000178537	SLC25A20	0.001	-1.21232	-0.314726	0.0421594	0.20346	0.00170609	0.0625915	0.89759	0.00170609	0.0633356	-3.29364	-3.40003	1.28943	0.359819	0.897161	0.972482	-0.106396	0.897161	0.97101
+pH fractionation/SP	High	O43776		Asparagine--tRNA ligase, cytoplasmic OS=Homo sapiens OX=9606 GN=NARS PE=1 SV=1	ENSG00000134440	NARS	0	4.22234	4.24346	0.0540433	0.151753	0.831495	0.91607	0.0211195	0.831495	0.915239	3.06853	2.87154	0.375347	0.480685	0.6057	0.877645	-0.196986	0.6057	0.880035
+pH fractionation/SP	High	O43791		Speckle-type POZ protein OS=Homo sapiens OX=9606 GN=SPOP PE=1 SV=1	ENSG00000121067	SPOP	0	-4.91508	-4.77163	0.200565	1.3	0.859371	0.932311	0.143455	0.859371	0.931247	0.0100271	-0.22061	0.794833	0.664758	0.719471	0.917782	-0.230638	0.719471	0.922606
+pH fractionation/SP	High	O43795		Unconventional myosin-Ib OS=Homo sapiens OX=9606 GN=MYO1B PE=1 SV=3	ENSG00000128641	MYO1B	0	2.06222	1.51702	0.124411	0.158834	0.00944512	0.117502	-0.545193	0.00944512	0.116521	2.87759	2.43612	0.153064	0.122839	0.0175999	0.283059	-0.441467	0.0175999	0.292977
+pH fractionation/SP	High	O43808		Peroxisomal membrane protein PMP34 OS=Homo sapiens OX=9606 GN=SLC25A17 PE=1 SV=1	ENSG00000100372	SLC25A17	0.001	-1.02362	-1.70094	0.299519	0.53515	0.128309	0.370363	-0.677318	0.128309	0.376046	-4.34481	-4.25027	1.19615	0.407829	0.903165	0.973397	0.0945342	0.903165	0.972777
+pH fractionation/SP	High	O43809		Cleavage and polyadenylation specificity factor subunit 5 OS=Homo sapiens OX=9606 GN=NUDT21 PE=1 SV=1	ENSG00000167005	NUDT21	0	2.68011	2.36234	0.244445	0.0964142	0.104286	0.333686	-0.317777	0.104286	0.342033	2.12132	2.49617	0.238397	0.533883	0.329067	0.742964	0.374849	0.329067	0.743982
+pH fractionation/SP	High	O43813		LanC-like protein 1 OS=Homo sapiens OX=9606 GN=LANCL1 PE=1 SV=1	ENSG00000115365	LANCL1	0	1.3443	1.90211	0.0735095	0.274351	0.0272369	0.181832	0.557809	0.0272369	0.188208	-0.65484	0.186234	0.552266	0.628814	0.156712	0.588258	0.841074	0.156712	0.587967
+pH fractionation/SP	High	O43815		Striatin OS=Homo sapiens OX=9606 GN=STRN PE=1 SV=4	ENSG00000115808	STRN	0	-0.441542	0.302466	0.20373	0.38966	0.0427825	0.215067	0.744008	0.0427825	0.223644	1.60253	2.30512	0.199214	0.388451	0.0494344	0.420376	0.702595	0.0494344	0.430409
+pH fractionation/SP	High	O43818		U3 small nucleolar RNA-interacting protein 2 OS=Homo sapiens OX=9606 GN=RRP9 PE=1 SV=1	ENSG00000114767	RRP9	0	-1.64964	-0.922207	0.572653	0.79754	0.268702	0.532749	0.727436	0.268702	0.532519	3.77192	2.89454	0.592377	0.951481	0.246638	0.687394	-0.877381	0.246638	0.684384
+pH fractionation/SP	High	O43819		Protein SCO2 homolog, mitochondrial OS=Homo sapiens OX=9606 GN=SCO2 PE=1 SV=3	ENSG00000130489	SCO2	0.002	-1.08551	-2.98	0.449161	1.05773	0.0461399	0.222918	-1.89449	0.0461399	0.231967	-4.08893	-2.95277	0.598532	1.26025	0.231212	0.667758	1.13616	0.231212	0.667399
+pH fractionation/SP	High	O43823		A-kinase anchor protein 8 OS=Homo sapiens OX=9606 GN=AKAP8 PE=1 SV=1	ENSG00000105127	AKAP8	0	2.48039	0.123265	2.53855	2.58677	0.322976	0.583981	-2.35712	0.322976	0.579343	2.97819	2.70746	0.385124	0.659373	0.572367	0.866821	-0.27073	0.572367	0.868037
+pH fractionation/SP	High	O43829		Zinc finger and BTB domain-containing protein 14 OS=Homo sapiens OX=9606 GN=ZBTB14 PE=1 SV=2	ENSG00000198081	ZBTB14; ZFP161	0.005		-4.04788	N.D.	2.90895	N.D.	NA	1.5239	0.322084	0.578719	-3.99486	-1.86049	2.04055	N.D.	N.D.	NA	-0.872603	0.671494	0.906473
+pH fractionation/SP	High	O43837		Isocitrate dehydrogenase [NAD] subunit beta, mitochondrial OS=Homo sapiens OX=9606 GN=IDH3B PE=1 SV=2	ENSG00000101365	IDH3B	0	3.25327	3.19073	0.0801966	0.175241	0.604047	0.784738	-0.062544	0.604047	0.781577	1.19671	1.89433	0.300911	0.709536	0.192	0.636635	0.69762	0.192	0.636262
+pH fractionation/SP	High	O43847-2		Isoform 2 of Nardilysin OS=Homo sapiens OX=9606 GN=NRDC		NRD1; NRDC	0	3.5663	2.96177	0.0874973	0.271425	0.0213602	0.163523	-0.604532	0.0213602	0.169198	0.554071	0.635956	0.733939	0.268627	0.864823	0.963032	0.081885	0.864823	0.963493
+pH fractionation/SP	High	O43852-3		Isoform 3 of Calumenin OS=Homo sapiens OX=9606 GN=CALU	ENSG00000128595	CALU	0	3.31701	2.56501	1.12598	0.666778	0.375903	0.628387	-0.752002	0.375903	0.622236	1.91354	1.133	1.1088	1.32951	0.478475	0.830025	-0.780547	0.478475	0.833616
+pH fractionation/SP	High	O43852-4		Isoform 4 of Calumenin OS=Homo sapiens OX=9606 GN=CALU	ENSG00000128595	CALU	0	-2.50118	-3.27796	0.613797	N.D.	N.D.	NA	-2.63336	0.0572475	0.25719			N.D.	N.D.	N.D.	NA	0.290461	0.108882	0.52739
+pH fractionation/SP	High	O43865		S-adenosylhomocysteine hydrolase-like protein 1 OS=Homo sapiens OX=9606 GN=AHCYL1 PE=1 SV=2	ENSG00000168710	AHCYL1	0	3.12325	3.41945	1.7083	0.875016	0.802456	0.899815	0.296203	0.802456	0.897595	2.85068	1.98719	2.09072	0.200681	0.515742	0.840695	-0.863493	0.515742	0.841167
+pH fractionation/SP	High	O43903		Growth arrest-specific protein 2 OS=Homo sapiens OX=9606 GN=GAS2 PE=1 SV=1	ENSG00000148935	GAS2	0.002	-3.0442	-4.44563	0.707638	0.199757	0.0799856	0.292068	-1.88944	0.0421939	0.222524	-5.14523	-3.86553	N.D.	1.21661	N.D.	NA	1.57107	0.25836	0.691754
+pH fractionation/SP	High	O43913		Origin recognition complex subunit 5 OS=Homo sapiens OX=9606 GN=ORC5 PE=1 SV=1	ENSG00000164815	ORC5	0	-0.776703	-0.998696	0.444917	0.470342	0.584546	0.772006	-0.221992	0.584546	0.769235	1.65684	0.906385	0.148841	0.175463	0.00483618	0.186708	-0.750459	0.00483618	0.194535
+pH fractionation/SP	High	O43920		NADH dehydrogenase [ubiquinone] iron-sulfur protein 5 OS=Homo sapiens OX=9606 GN=NDUFS5 PE=1 SV=3	ENSG00000168653	NDUFS5	0.002	-3.99238	-3.1687	0.563451	0.212811	0.0769328	0.285733	0.823675	0.0769328	0.296336	-6.52271	-5.42337	3.05678	0.262895	0.662683	0.898789	0.85662	0.547445	0.857139
+pH fractionation/SP	High	O43924		Retinal rod rhodopsin-sensitive cGMP 3',5'-cyclic phosphodiesterase subunit delta OS=Homo sapiens OX=9606 GN=PDE6D PE=1 SV=1	ENSG00000156973	PDE6D	0	-0.0856103	-0.1847	0.333558	0.366857	0.746673	0.868735	-0.0990899	0.746673	0.866207	-1.69035	-2.28479	1.80271	0.687277	0.621841	0.882809	-0.594447	0.621841	0.887132
+pH fractionation/SP	High	O43929		Origin recognition complex subunit 4 OS=Homo sapiens OX=9606 GN=ORC4 PE=1 SV=2	ENSG00000115947	ORC4	0	-0.309607	0.931409	0.240126	2.38548	0.420641	0.661518	1.24102	0.420641	0.656995	1.88033	0.935384	1.01362	0.0860369	0.18292	0.62347	-0.944946	0.18292	0.622704
+pH fractionation/SP	High	O60216		Double-strand-break repair protein rad21 homolog OS=Homo sapiens OX=9606 GN=RAD21 PE=1 SV=2	ENSG00000164754	RAD21	0	0.589853	1.3629	0.474483	0.173299	0.0569428	0.246325	0.773046	0.0569428	0.257105	3.48038	3.40567	0.15647	0.228611	0.664748	0.899753	-0.074707	0.664748	0.905278
+pH fractionation/SP	High	O60231		Pre-mRNA-splicing factor ATP-dependent RNA helicase DHX16 OS=Homo sapiens OX=9606 GN=DHX16 PE=1 SV=2	ENSG00000233561	DHX16	0	3.01654	2.14532	0.130849	0.265414	0.00698548	0.105906	-0.871218	0.00698548	0.104946	3.52176	2.86691	0.202483	0.255929	0.0254539	0.324328	-0.654848	0.0254539	0.334241
+pH fractionation/SP	High	O60232		Sjoegren syndrome/scleroderma autoantigen 1 OS=Homo sapiens OX=9606 GN=SSSCA1 PE=1 SV=1	ENSG00000173465	SSSCA1	0.002	-4.10269	-2.74813	0.549047	1.52556	0.331923	0.592476	1.91873	0.147318	0.403308	-0.432205	-3.64352	1.01483	0.705874	0.010827	0.248818	-3.21131	0.010827	0.255376
+pH fractionation/SP	High	O60234		Glia maturation factor gamma OS=Homo sapiens OX=9606 GN=GMFG PE=1 SV=1	ENSG00000130755	GMFG	0	2.65408	4.01162	0.376147	0.309662	0.00848548	0.112655	1.35754	0.00848548	0.111325	0.408432	1.71124	0.338739	0.575436	0.0278014	0.33299	1.30281	0.0278014	0.34491
+pH fractionation/SP	High	O60244		Mediator of RNA polymerase II transcription subunit 14 OS=Homo sapiens OX=9606 GN=MED14 PE=1 SV=2	ENSG00000180182	MED14	0	-2.08776	-1.03097	0.85226	0.667373	0.166105	0.421292	1.05679	0.166105	0.425078	-2.26156	-2.28798	0.36489	0.861719	0.963342	0.989739	-0.0264207	0.963342	0.988937
+pH fractionation/SP	High	O60256		Phosphoribosyl pyrophosphate synthase-associated protein 2 OS=Homo sapiens OX=9606 GN=PRPSAP2 PE=1 SV=1	ENSG00000141127	PRPSAP2	0	2.75378	3.10143	0.281368	0.204069	0.158236	0.409901	0.347653	0.158236	0.414862	1.02215	1.5029	0.348175	0.573805	0.282536	0.70913	0.480751	0.282536	0.706798
+pH fractionation/SP	High	O60264		SWI/SNF-related matrix-associated actin-dependent regulator of chromatin subfamily A member 5 OS=Homo sapiens OX=9606 GN=SMARCA5 PE=1 SV=1	ENSG00000153147	SMARCA5	0	1.80529	2.78466	0.236503	0.50682	0.0386663	0.210201	0.979369	0.0386663	0.21864	7.34629	6.78138	0.223624	0.111237	0.017284	0.279917	-0.564905	0.017284	0.289366
+pH fractionation/SP	High	O60271		C-Jun-amino-terminal kinase-interacting protein 4 OS=Homo sapiens OX=9606 GN=SPAG9 PE=1 SV=4	ENSG00000008294	SPAG9	0	0.286979	0.678282	0.527397	0.32696	0.336105	0.595839	0.391303	0.336105	0.591097	1.37089	0.880365	0.733522	1.21413	0.581474	0.869691	-0.490529	0.581474	0.87102
+pH fractionation/SP	High	O60281		Zinc finger protein 292 OS=Homo sapiens OX=9606 GN=ZNF292 PE=1 SV=3	ENSG00000188994	ZNF292	0	-1.06605	0.294123	0.273756	0.391049	0.00784272	0.110461	1.36017	0.00784272	0.109777	0.635571	0.741046	0.226886	0.342471	0.679536	0.906152	0.105475	0.679536	0.910921
+pH fractionation/SP	High	O60287		Nucleolar pre-ribosomal-associated protein 1 OS=Homo sapiens OX=9606 GN=URB1 PE=1 SV=4	ENSG00000142207	URB1	0	0.954841	1.07843	0.659596	0.131135	0.766188	0.880512	0.123584	0.766188	0.877724	5.00118	4.2802	0.189604	0.261227	0.0180123	0.284886	-0.72098	0.0180123	0.29386
+pH fractionation/SP	High	O60293		Zinc finger C3H1 domain-containing protein OS=Homo sapiens OX=9606 GN=ZFC3H1 PE=1 SV=3	ENSG00000133858	ZFC3H1	0	-3.26017	-2.67676	1.13489	0.556008	0.468741	0.698408	0.583412	0.468741	0.693583	0.10504	0.0920791	0.171438	0.368581	0.958609	0.98845	-0.0129605	0.958609	0.988012
+pH fractionation/SP	High	O60294		tRNA wybutosine-synthesizing protein 4 OS=Homo sapiens OX=9606 GN=LCMT2 PE=1 SV=3	ENSG00000168806	LCMT2	0.002	-3.12388	-3.44037	0.488109	0.46902	0.523797	0.735858	-1.15673	0.271085	0.533732	-6.56152	-5.5585	N.D.	N.D.	N.D.	NA	0.613292	0.121422	0.543271
+pH fractionation/SP	High	O60306		RNA helicase aquarius OS=Homo sapiens OX=9606 GN=AQR PE=1 SV=4	ENSG00000021776	AQR	0	2.94517	2.50853	0.446083	0.308544	0.23567	0.496028	-0.436641	0.23567	0.498825	4.73868	4.70148	0.329832	0.306064	0.893059	0.97137	-0.0372002	0.893059	0.969926
+pH fractionation/SP	High	O60313-10		Isoform 4 of Dynamin-like 120 kDa protein, mitochondrial OS=Homo sapiens OX=9606 GN=OPA1	ENSG00000198836	OPA1	0	2.53537	2.36326	0.214167	0.396404	0.544364	0.747855	-0.172117	0.544364	0.743654	1.08628	1.31767	0.923824	0.194506	0.693028	0.911229	0.231388	0.693028	0.917645
+pH fractionation/SP	High	O60318		Germinal-center associated nuclear protein OS=Homo sapiens OX=9606 GN=MCM3AP PE=1 SV=2	ENSG00000160294	MCM3AP	0	-1.44296	-1.60935	0.350508	0.640151	0.713083	0.847447	-0.166389	0.713083	0.845435	0.789567	1.11473	0.288845	0.334275	0.271379	0.703384	0.325167	0.271379	0.69926
+pH fractionation/SP	High	O60333-2		Isoform 2 of Kinesin-like protein KIF1B OS=Homo sapiens OX=9606 GN=KIF1B	ENSG00000054523	KIF1B	0.002	-2.23562	-3.55904	0.642157	0.557173	0.0543095	0.239022	-1.32342	0.0543095	0.249531	-3.8612	-3.23237	1.51416	0.450733	0.623514	0.882872	-0.455041	0.762195	0.935369
+pH fractionation/SP	High	O60337		E3 ubiquitin-protein ligase MARCH6 OS=Homo sapiens OX=9606 GN=MARCH6 PE=1 SV=2	ENSG00000145495	MARCH6	0.002	-4.12429	-4.08186	0.445455	0.465346	0.914669	0.961898	0.0424299	0.914669	0.961997	-5.41156		2.1799	N.D.	N.D.	NA	-1.10931	0.427924	0.810874
+pH fractionation/SP	High	O60341-2		Isoform 2 of Lysine-specific histone demethylase 1A OS=Homo sapiens OX=9606 GN=KDM1A	ENSG00000004487	KDM1A	0	3.05085	2.62851	0.162522	0.336902	0.122163	0.360411	-0.422342	0.122163	0.365989	3.55717	3.93029	0.12875	0.199396	0.0528318	0.425695	0.373123	0.0528318	0.435253
+pH fractionation/SP	High	O60343		TBC1 domain family member 4 OS=Homo sapiens OX=9606 GN=TBC1D4 PE=1 SV=2	ENSG00000136111	TBC1D4	0	-1.49411	-1.88236	0.393928	0.563536	0.383425	0.63368	-0.388258	0.383425	0.627568	-1.38064	-2.97661	2.20995	3.19206	0.515788	0.840695	-1.59597	0.515788	0.841167
+pH fractionation/SP	High	O60361		Putative nucleoside diphosphate kinase OS=Homo sapiens OX=9606 GN=NME2P1 PE=5 SV=1		NME2P1	0	1.15226	0.969579	0.343725	0.480299	0.620556	0.795941	-0.182677	0.620556	0.793586	-2.68914	-2.28248	1.00683	0.503763	0.565482	0.864438	0.406658	0.565482	0.864834
+pH fractionation/SP	High	O60427		Fatty acid desaturase 1 OS=Homo sapiens OX=9606 GN=FADS1 PE=1 SV=3		FADS1	0.003	-1.34335	-5.50498	0.172649	2.3973	0.0465373	0.222918	-4.39217	0.0121864	0.13325	-4.75422	-4.87753	0.294583	0.932442	0.874891	0.966143	-0.0399049	0.968935	0.991668
+pH fractionation/SP	High	O60443		Gasdermin-E OS=Homo sapiens OX=9606 GN=GSDME PE=1 SV=2	ENSG00000105928	DFNA5; GSDME	0.001	-4.18884	-1.44789	0.810989	0.688667	0.0111417	0.125993	2.74096	0.0111417	0.126002	-6.41179	-5.25618	1.21655	0.840435	0.287739	0.709704	1.3882	0.130875	0.554112
+pH fractionation/SP	High	O60476		Mannosyl-oligosaccharide 1,2-alpha-mannosidase IB OS=Homo sapiens OX=9606 GN=MAN1A2 PE=1 SV=1	ENSG00000198162	MAN1A2	0	-2.37117	-1.89142	0.646307	0.678723	0.425377	0.665398	0.479749	0.425377	0.660566	-3.64767	-3.5621	0.467387	0.453277	0.831086	0.95145	0.0855719	0.831086	0.955087
+pH fractionation/SP	High	O60488		Long-chain-fatty-acid--CoA ligase 4 OS=Homo sapiens OX=9606 GN=ACSL4 PE=1 SV=2	ENSG00000068366	ACSL4	0	2.35151	1.91121	0.227767	0.196994	0.0644946	0.258516	-0.440302	0.0644946	0.27016	0.656832	1.04403	0.324809	0.568657	0.363691	0.764939	0.387198	0.363691	0.768423
+pH fractionation/SP	High	O60493		Sorting nexin-3 OS=Homo sapiens OX=9606 GN=SNX3 PE=1 SV=3	ENSG00000112335	SNX3	0	2.53405	1.96135	0.404081	0.578267	0.232416	0.494803	-0.572705	0.232416	0.497469	1.43478	1.34934	0.477725	0.438501	0.830674	0.95145	-0.0854401	0.830674	0.955087
+pH fractionation/SP	High	O60502		Protein O-GlcNAcase OS=Homo sapiens OX=9606 GN=MGEA5 PE=1 SV=2	ENSG00000198408	MGEA5	0.004	-2.876	-3.06657	0.408021	0.371042	0.581753	0.770958	-0.190566	0.581753	0.76808	-6.13795	-5.12494	2.55866	1.35575	0.590131	0.871503	1.13149	0.436667	0.815188
+pH fractionation/SP	High	O60504		Vinexin OS=Homo sapiens OX=9606 GN=SORBS3 PE=1 SV=2	ENSG00000120896	SORBS3	0	-0.652392	-0.880402	0.273652	0.47922	0.513768	0.728583	-0.22801	0.513768	0.724081	-1.903	-4.33361	1.39019	1.05915	0.130853	0.551408	-3.17277	0.0541554	0.438251
+pH fractionation/SP	High	O60506		Heterogeneous nuclear ribonucleoprotein Q OS=Homo sapiens OX=9606 GN=SYNCRIP PE=1 SV=2	ENSG00000135316	SYNCRIP	0	3.80255	3.47709	0.456018	0.579341	0.487129	0.710902	-0.325467	0.487129	0.706144	6.1339	5.93613	0.292242	0.321057	0.47423	0.826533	-0.197774	0.47423	0.829887
+pH fractionation/SP	High	O60508		Pre-mRNA-processing factor 17 OS=Homo sapiens OX=9606 GN=CDC40 PE=1 SV=1	ENSG00000168438	CDC40	0	-0.469387	1.39351	0.450617	0.321291	0.00431205	0.0904965	1.8629	0.00431205	0.0894357	3.71638	3.57722	0.419397	0.468999	0.721151	0.918601	-0.139153	0.721151	0.923632
+pH fractionation/SP	High	O60524		Nuclear export mediator factor NEMF OS=Homo sapiens OX=9606 GN=NEMF PE=1 SV=4	ENSG00000165525	NEMF	0	-0.795293	-0.557135	0.451405	0.864471	0.69406	0.835584	0.238159	0.69406	0.832124	-1.72359	-1.54863	0.504374	0.67016	0.736155	0.921826	0.174958	0.736155	0.928386
+pH fractionation/SP	High	O60547		GDP-mannose 4,6 dehydratase OS=Homo sapiens OX=9606 GN=GMDS PE=1 SV=1	ENSG00000112699	GMDS	0	1.98784	2.12716	0.26808	0.165346	0.486295	0.710808	0.139325	0.486295	0.706144	1.74942	1.2442	0.957121	0.150775	0.417527	0.797376	-0.505219	0.417527	0.805404
+pH fractionation/SP	High	O60551		Glycylpeptide N-tetradecanoyltransferase 2 OS=Homo sapiens OX=9606 GN=NMT2 PE=1 SV=1	ENSG00000152465	NMT2	0	-5.67	-1.59624	1.13611	0.630431	0.00557779	0.0977487	4.07377	0.00557779	0.0965551	-3.60217	-2.14793	1.65616	0.371966	0.211992	0.657451	1.45424	0.211992	0.656334
+pH fractionation/SP	High	O60563		Cyclin-T1 OS=Homo sapiens OX=9606 GN=CCNT1 PE=1 SV=1	ENSG00000129315	CCNT1	0	-0.495306	-0.923584	0.549442	0.861549	0.508071	0.724352	-0.428278	0.508071	0.720495	-0.0529658	-0.0435689	0.788055	0.215864	0.985062	0.995395	0.00939693	0.985062	0.996319
+pH fractionation/SP	High	O60566-3		Isoform 3 of Mitotic checkpoint serine/threonine-protein kinase BUB1 beta OS=Homo sapiens OX=9606 GN=BUB1B	ENSG00000156970	BUB1B	0.002	-1.7238	-4.72594	0.242505	1.01008	0.0128407	0.136231	-3.46153	0.00543986	0.095114	-3.84035		N.D.	N.D.	N.D.	NA	-0.678398	0.514233	0.84043
+pH fractionation/SP	High	O60568		Procollagen-lysine,2-oxoglutarate 5-dioxygenase 3 OS=Homo sapiens OX=9606 GN=PLOD3 PE=1 SV=1	ENSG00000106397	PLOD3	0.007	-6.23525	-3.62725	N.D.	N.D.	N.D.	NA	0.87373	0.35582	0.605269	-6.35597	-5.97028	N.D.	N.D.	N.D.	NA	0.349403	0.286975	0.707834
+pH fractionation/SP	High	O60573		Eukaryotic translation initiation factor 4E type 2 OS=Homo sapiens OX=9606 GN=EIF4E2 PE=1 SV=1	ENSG00000135930	EIF4E2	0.001	-3.57334	-3.27803	0.176742	0.993209	0.718735	0.851427	1.06705	0.330496	0.586873	-2.18424	-2.40627	0.497965	0.601137	0.648073	0.891389	-0.22203	0.648073	0.898144
+pH fractionation/SP	High	O60610		Protein diaphanous homolog 1 OS=Homo sapiens OX=9606 GN=DIAPH1 PE=1 SV=2	ENSG00000131504	DIAPH1	0	4.93066	5.36287	0.294592	0.43941	0.229967	0.492085	0.432206	0.229967	0.494801	3.06427	3.3628	0.722198	0.636895	0.619758	0.881646	0.298529	0.619758	0.885451
+pH fractionation/SP	High	O60613		Selenoprotein F OS=Homo sapiens OX=9606 GN=SELENOF PE=1 SV=4		SELENOF	0	-1.28992	-1.36393	0.995155	0.551122	0.91571	0.962367	-0.0740079	0.91571	0.962491		-4.95396	N.D.	N.D.	N.D.	NA	0.738139	0.252469	0.688343
+pH fractionation/SP	High	O60645		Exocyst complex component 3 OS=Homo sapiens OX=9606 GN=EXOC3 PE=1 SV=2		EXOC3	0	-0.663317	-1.23658	0.658222	0.412159	0.270207	0.533092	-0.573265	0.270207	0.532616	-3.54881	-2.89669	0.137024	0.402123	0.0564659	0.438885	0.652114	0.0564659	0.447765
+pH fractionation/SP	High	O60664		Perilipin-3 OS=Homo sapiens OX=9606 GN=PLIN3 PE=1 SV=3	ENSG00000105355	PLIN3	0	2.38686	2.69396	0.16591	0.268663	0.167365	0.4229	0.307098	0.167365	0.426784	0.513028	0.11743	0.524549	0.808569	0.516391	0.840695	-0.395597	0.516391	0.841167
+pH fractionation/SP	High	O60671		Cell cycle checkpoint protein RAD1 OS=Homo sapiens OX=9606 GN=RAD1 PE=1 SV=1	ENSG00000113456	RAD1	0.002	-2.65457	-3.39277	0.799255	1.1439	0.532397	0.741223	-0.445559	0.797569	0.895319	-3.70346	-3.9891	2.30401	0.346795	0.87915	0.968085	-1.07856	0.526119	0.847314
+pH fractionation/SP	High	O60675		Transcription factor MafK OS=Homo sapiens OX=9606 GN=MAFK PE=1 SV=1	ENSG00000198517	MAFK	0	-4.72708	-4.07053	0.532077	0.378766	0.156629	0.408024	0.656551	0.156629	0.413212	1.20833	0.168959	0.137247	0.456731	0.0195225	0.285456	-1.03937	0.0195225	0.295506
+pH fractionation/SP	High	O60678		Protein arginine N-methyltransferase 3 OS=Homo sapiens OX=9606 GN=PRMT3 PE=1 SV=4	ENSG00000185238	PRMT3	0	1.51316	1.14743	0.130349	0.497128	0.28522	0.548025	-0.365734	0.28522	0.546801	3.01561	3.34031	0.733153	0.599231	0.584508	0.870209	0.324702	0.584508	0.871911
+pH fractionation/SP	High	O60684		Importin subunit alpha-7 OS=Homo sapiens OX=9606 GN=KPNA6 PE=1 SV=1	ENSG00000025800	KPNA6	0	-0.747511	-1.73515	0.626794	0.0795567	0.0536768	0.237542	-0.987644	0.0536768	0.247959	4.27336	2.79686	1.80047	3.56014	0.556392	0.860655	-1.4765	0.556392	0.860156
+pH fractionation/SP	High	O60701		UDP-glucose 6-dehydrogenase OS=Homo sapiens OX=9606 GN=UGDH PE=1 SV=1	ENSG00000109814	UGDH	0	-0.661989	-0.415912	0.454067	0.689066	0.632753	0.801891	0.246077	0.632753	0.799595	-3.47106	-2.34098	2.87766	0.434066	0.538069	0.853274	1.13008	0.538069	0.853678
+pH fractionation/SP	High	O60711-2		Isoform 2 of Leupaxin OS=Homo sapiens OX=9606 GN=LPXN	ENSG00000110031	LPXN	0	1.17099	2.14993	0.356389	0.420272	0.037038	0.207312	0.978935	0.037038	0.21498	-0.301324	0.63527	0.148552	0.932122	0.1608	0.596853	0.936594	0.1608	0.597307
+pH fractionation/SP	High	O60725		Protein-S-isoprenylcysteine O-methyltransferase OS=Homo sapiens OX=9606 GN=ICMT PE=1 SV=1	ENSG00000116237	ICMT	0.005	-3.36959	-3.39323	0.0891844	1.06629	0.969309	0.986552	-0.945769	0.406718	0.646083	-4.38724	-4.37627	0.0296778	0.877698	0.98751	0.99565	0.113396	0.924996	0.980013
+pH fractionation/SP	High	O60739		Eukaryotic translation initiation factor 1b OS=Homo sapiens OX=9606 GN=EIF1B PE=1 SV=2	ENSG00000114784	EIF1B	0	0.267191	-0.0527046	0.10661	0.145643	0.0373004	0.207664	-0.319895	0.0373004	0.215434	-0.868044	-1.35659	0.441913	0.394883	0.226522	0.667758	-0.488547	0.226522	0.667399
+pH fractionation/SP	High	O60749		Sorting nexin-2 OS=Homo sapiens OX=9606 GN=SNX2 PE=1 SV=2	ENSG00000205302	SNX2	0	2.51678	2.33466	0.260646	0.271596	0.449182	0.682075	-0.182126	0.449182	0.677808	-0.413561	0.188849	0.33996	0.384331	0.111769	0.526342	0.60241	0.111769	0.532891
+pH fractionation/SP	High	O60762		Dolichol-phosphate mannosyltransferase subunit 1 OS=Homo sapiens OX=9606 GN=DPM1 PE=1 SV=1	ENSG00000000419	DPM1	0	1.82183	1.87946	0.594645	0.294199	0.887684	0.948468	0.0576319	0.887684	0.946432	0.113294	-0.183204	0.302665	0.617619	0.496764	0.836645	-0.296498	0.496764	0.837212
+pH fractionation/SP	High	O60763-2		Isoform 2 of General vesicular transport factor p115 OS=Homo sapiens OX=9606 GN=USO1	ENSG00000138768	USO1	0	2.69058	3.34426	0.12153	0.143907	0.00385679	0.0875212	0.653676	0.00385679	0.0870474	1.37044	1.44622	0.498829	0.641646	0.879541	0.968254	0.0757732	0.879541	0.968457
+pH fractionation/SP	High	O60783		28S ribosomal protein S14, mitochondrial OS=Homo sapiens OX=9606 GN=MRPS14 PE=1 SV=1	ENSG00000120333	MRPS14	0.001	-2.67928	-2.50506	0.587836	0.547437	0.72625	0.854588	0.174214	0.72625	0.853512	-2.51522	-1.44303	1.47651	0.474688	0.412195	0.794333	-0.567684	0.775238	0.940755
+pH fractionation/SP	High	O60784-2		Isoform 2 of Target of Myb protein 1 OS=Homo sapiens OX=9606 GN=TOM1	ENSG00000100284	TOM1	0.002	-4.37507	-4.36492	0.900455	1.65011	0.992988	0.996721	0.0101468	0.992988	0.996489	-6.49757	-6.78502	N.D.	N.D.	N.D.	NA	-0.0171977	0.886121	0.969051
+pH fractionation/SP	High	O60814		Histone H2B type 1-K OS=Homo sapiens OX=9606 GN=HIST1H2BK PE=1 SV=3	ENSG00000197903	HIST1H2BK	0	5.55098	6.07697	0.416589	1.17163	0.504384	0.72188	0.525998	0.504384	0.718166	12.1971	12.2476	0.295974	0.839758	0.926361	0.98107	0.0505756	0.926361	0.980013
+pH fractionation/SP	High	O60825		6-phosphofructo-2-kinase/fructose-2,6-bisphosphatase 2 OS=Homo sapiens OX=9606 GN=PFKFB2 PE=1 SV=2	ENSG00000123836	PFKFB2	0	-1.05635	-0.617348	0.167213	0.436249	0.178955	0.43858	0.439003	0.178955	0.443105	-2.25428	-3.40299	0.411334	0.219167	0.0129621	0.25421	-1.14871	0.0129621	0.265619
+pH fractionation/SP	High	O60826		Coiled-coil domain-containing protein 22 OS=Homo sapiens OX=9606 GN=CCDC22 PE=1 SV=1	ENSG00000101997	CCDC22	0	-1.36511	-1.64603	0.477106	0.453888	0.500994	0.719598	-0.280915	0.500994	0.715925	-2.79613	-3.14186	0.945674	1.79137	0.782234	0.936383	-0.345728	0.782234	0.940755
+pH fractionation/SP	High	O60828		Polyglutamine-binding protein 1 OS=Homo sapiens OX=9606 GN=PQBP1 PE=1 SV=1	ENSG00000102103	PQBP1	0	-0.921011	-1.76121	0.325127	0.370658	0.0419031	0.213804	-0.840201	0.0419031	0.222524	1.09666	0.96267	0.419771	0.214259	0.648213	0.891389	-0.133993	0.648213	0.898144
+pH fractionation/SP	High	O60830-2		Isoform 2 of Mitochondrial import inner membrane translocase subunit Tim17-B OS=Homo sapiens OX=9606 GN=TIMM17B	ENSG00000126768	TIMM17B	0.001	-2.17137	-2.74564	1.33855	1.62923	0.661703	0.818578	-0.574274	0.661703	0.816303	-5.19835	-6.75699	1.01422	2.15829	0.336636	0.744597	-1.42889	0.251129	0.686039
+pH fractionation/SP	High	O60831		PRA1 family protein 2 OS=Homo sapiens OX=9606 GN=PRAF2 PE=1 SV=1	ENSG00000243279	PRAF2	0.001	1.2874	1.66328	0.152618	0.39217	0.196746	0.455913	0.375885	0.196746	0.459194	-0.311908	0.266605	0.673969	0.160288	0.221606	0.667599	0.578513	0.221606	0.667399
+pH fractionation/SP	High	O60832		H/ACA ribonucleoprotein complex subunit 4 OS=Homo sapiens OX=9606 GN=DKC1 PE=1 SV=3	ENSG00000130826	DKC1	0	1.95799	1.41642	0.442068	0.616651	0.283978	0.547206	-0.541572	0.283978	0.545886	5.9295	5.66405	0.124736	0.154661	0.0816733	0.478402	-0.265451	0.0816733	0.485696
+pH fractionation/SP	High	O60841		Eukaryotic translation initiation factor 5B OS=Homo sapiens OX=9606 GN=EIF5B PE=1 SV=4	ENSG00000158417	EIF5B	0	3.56697	2.7393	0.248288	0.495956	0.0610238	0.25326	-0.827668	0.0610238	0.264176	2.78319	2.30772	0.160384	0.376684	0.114599	0.530006	-0.475467	0.114599	0.536648
+pH fractionation/SP	High	O60861		Growth arrest-specific protein 7 OS=Homo sapiens OX=9606 GN=GAS7 PE=1 SV=3	ENSG00000007237	GAS7	0.002	-3.07203	-3.15418	0.573257	1.04296	0.913527	0.961898	-1.09081	0.394245	0.637422	-4.86425	-4.34506	0.874739	0.948163	0.572251	0.866821	-0.200729	0.844723	0.957832
+pH fractionation/SP	High	O60869		Endothelial differentiation-related factor 1 OS=Homo sapiens OX=9606 GN=EDF1 PE=1 SV=1	ENSG00000107223	EDF1	0	3.11935	2.60188	0.306572	0.490647	0.196263	0.455779	-0.51747	0.196263	0.45906	4.22743	3.47569	1.0666	1.4986	0.518099	0.841363	-0.751735	0.518099	0.841809
+pH fractionation/SP	High	O60870		DNA/RNA-binding protein KIN17 OS=Homo sapiens OX=9606 GN=KIN PE=1 SV=2	ENSG00000151657	KIN	0	-0.494559	-0.754542	0.742708	0.417323	0.62507	0.798518	-0.259984	0.62507	0.796575	1.9941	1.74616	0.0540309	0.126862	0.035716	0.371005	-0.247946	0.035716	0.381658
+pH fractionation/SP	High	O60879		Protein diaphanous homolog 2 OS=Homo sapiens OX=9606 GN=DIAPH2 PE=1 SV=1	ENSG00000147202	DIAPH2	0	-0.34831	-1.26111	0.0872932	0.703831	0.0896887	0.309772	-0.9128	0.0896887	0.319649	-3.63177	-2.66734	1.64914	0.503106	0.38749	0.77807	0.96443	0.38749	0.785356
+pH fractionation/SP	High	O60880		SH2 domain-containing protein 1A OS=Homo sapiens OX=9606 GN=SH2D1A PE=1 SV=1	ENSG00000183918	SH2D1A	0	2.71707	3.11524	0.0803332	0.236266	0.0506608	0.229956	0.398176	0.0506608	0.239918	1.07204	1.29791	0.277206	0.615174	0.593132	0.873535	0.225875	0.593132	0.875429
+pH fractionation/SP	High	O60884		DnaJ homolog subfamily A member 2 OS=Homo sapiens OX=9606 GN=DNAJA2 PE=1 SV=1	ENSG00000069345	DNAJA2	0	3.70474	3.11364	0.201081	0.271864	0.0388665	0.210201	-0.591105	0.0388665	0.218776	2.18087	2.93112	0.509535	0.230946	0.0808841	0.477093	0.750248	0.0808841	0.484838
+pH fractionation/SP	High	O60885		Bromodomain-containing protein 4 OS=Homo sapiens OX=9606 GN=BRD4 PE=1 SV=2	ENSG00000141867	BRD4	0	1.70377	1.27633	0.218175	0.445012	0.209529	0.473533	-0.427443	0.209529	0.475445	4.86086	4.39909	0.0863521	0.309575	0.0675859	0.460309	-0.461775	0.0675859	0.467639
+pH fractionation/SP	High	O60888-2		Isoform A of Protein CutA OS=Homo sapiens OX=9606 GN=CUTA	ENSG00000112514	CUTA	0.005	-0.604188	0.396214	1.16388	1.21344	0.360986	0.616551	1.0004	0.360986	0.611189	-3.3913	-4.09471	0.0194527	1.07759	0.453446	0.819245	-0.38299	0.796442	0.944041
+pH fractionation/SP	High	O60906		Sphingomyelin phosphodiesterase 2 OS=Homo sapiens OX=9606 GN=SMPD2 PE=1 SV=2	ENSG00000135587	SMPD2	0.008	-5.74407	-4.3998	3.578	1.85908	0.683726	0.828894	1.0218	0.589446	0.772113	-5.61272	-6.04236	1.73072	N.D.	N.D.	NA	-0.320201	0.716902	0.921814
+pH fractionation/SP	High	O60925		Prefoldin subunit 1 OS=Homo sapiens OX=9606 GN=PFDN1 PE=1 SV=2	ENSG00000113068	PFDN1	0.002	-2.05353	-0.90743	0.190334	0.420084	0.0126026	0.135077	1.1461	0.0126026	0.136122	-4.18492	-3.91993	0.20476	0.977875	0.742935	0.922812	1.22682	0.334274	0.745207
+pH fractionation/SP	High	O60927		E3 ubiquitin-protein ligase PPP1R11 OS=Homo sapiens OX=9606 GN=PPP1R11 PE=1 SV=1	ENSG00000237829	PPP1R11	0	-0.546263	-1.45839	0.410596	0.537419	0.07973	0.291849	-0.91213	0.07973	0.302125	-5.22628	-5.60375	N.D.	N.D.	N.D.	NA	0.156859	0.821112	0.952141
+pH fractionation/SP	High	O60930		Ribonuclease H1 OS=Homo sapiens OX=9606 GN=RNASEH1 PE=1 SV=2	ENSG00000171865	RNASEH1	0.002	-2.02508	-4.92735	0.465099	2.32948	0.101779	0.330062	-2.90228	0.101779	0.338582	-3.90914	-4.27938	1.16152	2.75648	0.840731	0.953105	-0.370239	0.840731	0.956532
+pH fractionation/SP	High	O60934		Nibrin OS=Homo sapiens OX=9606 GN=NBN PE=1 SV=1	ENSG00000104320	NBN	0	-3.55768	-3.41929	0.897604	0.650155	0.83936	0.920366	0.138389	0.83936	0.919991	-0.809311	-1.30331	0.62491	1.36417	0.59902	0.876317	-0.494003	0.59902	0.879045
+pH fractionation/SP	High	O60942		mRNA-capping enzyme OS=Homo sapiens OX=9606 GN=RNGTT PE=1 SV=1	ENSG00000111880	RNGTT	0.001	-1.7099	-1.73385	0.254812	0.383006	0.932476	0.969807	-0.0239526	0.932476	0.969374	-4.32876	-2.88104	1.85884	0.482565	0.261688	0.698236	1.44772	0.261688	0.693907
+pH fractionation/SP	High	O75027-2		Isoform 2 of ATP-binding cassette sub-family B member 7, mitochondrial OS=Homo sapiens OX=9606 GN=ABCB7	ENSG00000131269	ABCB7	0	0.772453	0.433254	0.428657	0.172639	0.272502	0.535264	-0.339199	0.272502	0.534541	-1.20481	-1.16808	0.806897	0.306928	0.944784	0.984761	0.0367363	0.944784	0.984518
+pH fractionation/SP	High	O75037		Kinesin-like protein KIF21B OS=Homo sapiens OX=9606 GN=KIF21B PE=1 SV=2	ENSG00000116852	KIF21B	0	-2.9286	-2.38484	0.281951	1.19189	0.484799	0.709915	0.543763	0.484799	0.705174	-0.788985	-2.02505	2.2097	0.417013	0.394973	0.783777	-1.23607	0.394973	0.79071
+pH fractionation/SP	High	O75044		SLIT-ROBO Rho GTPase-activating protein 2 OS=Homo sapiens OX=9606 GN=SRGAP2 PE=1 SV=3		SRGAP2	0.001	-1.68584	-3.48668	0.405649	2.14474	0.226213	0.48818	-1.80084	0.226213	0.491054	-4.38532	-4.85345	0.60781	1.66531	0.671136	0.901052	-0.468135	0.671136	0.906228
+pH fractionation/SP	High	O75081		Protein CBFA2T3 OS=Homo sapiens OX=9606 GN=CBFA2T3 PE=1 SV=2	ENSG00000129993	CBFA2T3	0.003			N.D.	N.D.	N.D.	NA	0.311662	0.237208	0.500432	-4.03769	-5.75491	1.23069	N.D.	N.D.	NA	-2.16684	0.0441317	0.417905
+pH fractionation/SP	High	O75083		WD repeat-containing protein 1 OS=Homo sapiens OX=9606 GN=WDR1 PE=1 SV=4	ENSG00000071127	WDR1	0	6.62355	7.04103	0.0422068	0.194423	0.0220723	0.166792	0.417472	0.0220723	0.172373	4.93228	5.73713	0.0999973	0.300612	0.0116887	0.249391	0.804849	0.0116887	0.259106
+pH fractionation/SP	High	O75116		Rho-associated protein kinase 2 OS=Homo sapiens OX=9606 GN=ROCK2 PE=1 SV=4	ENSG00000134318	ROCK2	0	-0.427481	-1.53126	0.440041	0.752257	0.09331	0.315364	-1.10377	0.09331	0.324306	-2.91645	-2.53047	1.35195	1.31878	0.741226	0.922606	0.38598	0.741226	0.92892
+pH fractionation/SP	High	O75122-3		Isoform 3 of CLIP-associating protein 2 OS=Homo sapiens OX=9606 GN=CLASP2		CLASP2	0	2.25024	1.42961	0.417511	0.324067	0.0546971	0.23963	-0.820623	0.0546971	0.25019	1.75716	1.17235	0.445786	0.627395	0.258499	0.695716	-0.584807	0.258499	0.691754
+pH fractionation/SP	High	O75131		Copine-3 OS=Homo sapiens OX=9606 GN=CPNE3 PE=1 SV=1	ENSG00000085719	CPNE3	0	1.63875	1.93601	0.10876	0.431103	0.31128	0.572088	0.297266	0.31128	0.568875	3.34403	3.53152	0.355455	0.249102	0.495951	0.836422	0.18749	0.495951	0.836876
+pH fractionation/SP	High	O75132		Zinc finger BED domain-containing protein 4 OS=Homo sapiens OX=9606 GN=ZBED4 PE=1 SV=2	ENSG00000100426	ZBED4	0	-4.28921	-3.42131	3.84008	2.785	0.767172	0.881139	0.867905	0.767172	0.878459	-0.384008	-1.08863	0.681188	1.23922	0.436784	0.809072	-0.704624	0.436784	0.815188
+pH fractionation/SP	High	O75145		Liprin-alpha-3 OS=Homo sapiens OX=9606 GN=PPFIA3 PE=1 SV=3	ENSG00000177380	PPFIA3	0.007	-5.06481	-5.8164	0.104619	0.74342	0.292495	0.554264	-0.449313	0.368423	0.615801	-7.59841		0.0188363	N.D.	N.D.	NA	0.745364	0.130679	0.554112
+pH fractionation/SP	High	O75146		Huntingtin-interacting protein 1-related protein OS=Homo sapiens OX=9606 GN=HIP1R PE=1 SV=2	ENSG00000130787	HIP1R	0	-0.544939	-2.78059	0.605648	1.83243	0.115267	0.350838	-2.23565	0.115267	0.357454	-3.95249	-4.83508	3.35705	0.909793	0.673098	0.902642	0.0376807	0.983688	0.996009
+pH fractionation/SP	High	O75150		E3 ubiquitin-protein ligase BRE1B OS=Homo sapiens OX=9606 GN=RNF40 PE=1 SV=4		RNF40	0	1.46871	1.17218	0.111464	0.133248	0.0417018	0.213804	-0.296526	0.0417018	0.222524	0.992304	1.08375	0.245316	0.669584	0.835112	0.952336	0.0914432	0.835112	0.955663
+pH fractionation/SP	High	O75151		Lysine-specific demethylase PHF2 OS=Homo sapiens OX=9606 GN=PHF2 PE=1 SV=4	ENSG00000197724	PHF2	0	0.175187	0.393427	0.111787	0.714941	0.629007	0.800161	0.21824	0.629007	0.798019	2.71791	2.45764	0.268553	0.173503	0.231358	0.667758	-0.260271	0.231358	0.667399
+pH fractionation/SP	High	O75152		Zinc finger CCCH domain-containing protein 11A OS=Homo sapiens OX=9606 GN=ZC3H11A PE=1 SV=3	ENSG00000058673	ZC3H11A	0	1.30047	1.32777	0.153194	0.281918	0.889967	0.950485	0.0273002	0.889967	0.948471	4.76666	4.78549	0.277157	0.103147	0.917492	0.978321	0.0188307	0.917492	0.977626
+pH fractionation/SP	High	O75153		Clustered mitochondria protein homolog OS=Homo sapiens OX=9606 GN=CLUH PE=1 SV=2	ENSG00000132361	CLUH; KIAA0664	0	3.37958	1.29793	0.0753416	0.19749	6.92776e-05	0.0234416	-2.08165	6.92776e-05	0.0219357	1.75337	1.0748	0.199125	0.401134	0.058527	0.445472	-0.67857	0.058527	0.455234
+pH fractionation/SP	High	O75155		Cullin-associated NEDD8-dissociated protein 2 OS=Homo sapiens OX=9606 GN=CAND2 PE=1 SV=3	ENSG00000144712	CAND2	0	-2.23094	-3.10925	0.912553	1.09831	0.346745	0.605323	-0.878318	0.346745	0.600735	-0.240348	-2.64144	1.31519	1.24135	0.134394	0.558795	-3.71076	0.0807465	0.484838
+pH fractionation/SP	High	O75165		DnaJ homolog subfamily C member 13 OS=Homo sapiens OX=9606 GN=DNAJC13 PE=1 SV=5	ENSG00000138246	DNAJC13	0	1.28442	2.03255	0.160027	0.255364	0.0126477	0.135077	0.748128	0.0126477	0.136122	0.838299	1.28786	0.595022	0.189346	0.280428	0.709002	0.449557	0.280428	0.70676
+pH fractionation/SP	High	O75167-4		Isoform 4 of Phosphatase and actin regulator 2 OS=Homo sapiens OX=9606 GN=PHACTR2	ENSG00000112419	PHACTR2	0.004	-3.62498	-4.25923	N.D.	1.84834	N.D.	NA	0.549091	0.692755	0.831534	-4.52168	-3.53932	N.D.	N.D.	N.D.	NA	0.621079	0.65682	0.900908
+pH fractionation/SP	High	O75170		Serine/threonine-protein phosphatase 6 regulatory subunit 2 OS=Homo sapiens OX=9606 GN=PPP6R2 PE=1 SV=2	ENSG00000100239	PPP6R2	0.002	-5.26062	-3.37818	1.8735	1.38195	0.317867	0.578882	0.999209	0.543337	0.743063	-4.06554	-4.39056	N.D.	0.64151	N.D.	NA	0.933877	0.477911	0.833616
+pH fractionation/SP	High	O75175		CCR4-NOT transcription complex subunit 3 OS=Homo sapiens OX=9606 GN=CNOT3 PE=1 SV=1	ENSG00000274176	CNOT3	0	0.89694	0.244243	0.165143	0.397749	0.0584924	0.249439	-0.652697	0.0584924	0.259901	1.16159	0.830089	0.274587	0.29695	0.22872	0.667758	-0.331503	0.22872	0.667399
+pH fractionation/SP	High	O75177		Calcium-responsive transactivator OS=Homo sapiens OX=9606 GN=SS18L1 PE=1 SV=2	ENSG00000184402	SS18L1	0.006	-5.83923	-4.93856	N.D.	0.400528	N.D.	NA	0.788836	0.16156	0.419074	-2.13484	-1.89112	1.04941	0.653703	0.76266	0.93026	1.70327	0.338238	0.74883
+pH fractionation/SP	High	O75179		Ankyrin repeat domain-containing protein 17 OS=Homo sapiens OX=9606 GN=ANKRD17 PE=1 SV=3	ENSG00000132466	ANKRD17	0	2.21986	1.78934	0.12506	0.359904	0.121956	0.360026	-0.430524	0.121956	0.365583	1.69516	1.52253	0.630497	0.506585	0.730348	0.921746	-0.172635	0.730348	0.926698
+pH fractionation/SP	High	O75182		Paired amphipathic helix protein Sin3b OS=Homo sapiens OX=9606 GN=SIN3B PE=1 SV=2	ENSG00000127511	SIN3B	0	-5.61359	-3.51043	2.56674	1.29553	0.273907	0.536429	2.10316	0.273907	0.535378	-0.593033	-0.621594	0.744268	0.6845	0.963327	0.989739	-0.0285605	0.963327	0.988937
+pH fractionation/SP	High	O75190		DnaJ homolog subfamily B member 6 OS=Homo sapiens OX=9606 GN=DNAJB6 PE=1 SV=2	ENSG00000105993	DNAJB6	0	0.558045	-0.502724	0.59288	0.381677	0.0596896	0.251273	-1.06077	0.0596896	0.261885	0.715777	0.187861	0.577637	0.61576	0.339723	0.746855	-0.527916	0.339723	0.749359
+pH fractionation/SP	High	O75191		Xylulose kinase OS=Homo sapiens OX=9606 GN=XYLB PE=1 SV=3	ENSG00000093217	XYLB	0.001	-1.77932	-2.02672	0.170612	0.466614	0.437053	0.673569	-0.247403	0.437053	0.669286	-5.53999	-4.41167	0.457325	1.44411	0.381628	0.776588	1.50943	0.18195	0.622704
+pH fractionation/SP	High	O75223		Gamma-glutamylcyclotransferase OS=Homo sapiens OX=9606 GN=GGCT PE=1 SV=1	ENSG00000006625	GGCT	0	0.867688	0.642344	0.459277	0.241956	0.493948	0.715034	-0.225344	0.493948	0.710414	-4.50535	-3.46543	2.617	2.60573	0.651269	0.891842	1.03992	0.651269	0.898358
+pH fractionation/SP	High	O75251		NADH dehydrogenase [ubiquinone] iron-sulfur protein 7, mitochondrial OS=Homo sapiens OX=9606 GN=NDUFS7 PE=1 SV=3	ENSG00000115286	NDUFS7	0.001	0.672148	0.341902	0.0635985	0.347378	0.18061	0.440066	-0.330246	0.18061	0.444535	-0.270677	-0.313521	1.09843	1.3232	0.96765	0.991105	-0.0428433	0.96765	0.990661
+pH fractionation/SP	High	O75306		NADH dehydrogenase [ubiquinone] iron-sulfur protein 2, mitochondrial OS=Homo sapiens OX=9606 GN=NDUFS2 PE=1 SV=2	ENSG00000158864	NDUFS2	0	1.08993	1.35568	0.252941	0.27906	0.288747	0.551119	0.265754	0.288747	0.550112	-1.85323	-1.07329	0.423118	0.890775	0.242592	0.680898	0.77994	0.242592	0.679496
+pH fractionation/SP	High	O75312		Zinc finger protein ZPR1 OS=Homo sapiens OX=9606 GN=ZPR1 PE=1 SV=1	ENSG00000109917	ZNF259; ZPR1	0	2.78261	2.31894	0.338993	0.175126	0.103092	0.332088	-0.463672	0.103092	0.340088	0.905388	0.873659	0.704536	0.370307	0.948265	0.9853	-0.0317297	0.948265	0.985188
+pH fractionation/SP	High	O75319		RNA/RNP complex-1-interacting phosphatase OS=Homo sapiens OX=9606 GN=DUSP11 PE=1 SV=2		DUSP11	0	-6.97023	-6.1733	2.08366	3.35283	0.744224	0.866459	0.796926	0.744224	0.863782	-1.95989	-3.89018	0.647876	1.95591	0.188516	0.631607	-2.77514	0.0854907	0.489142
+pH fractionation/SP	High	O75323		Protein NipSnap homolog 2 OS=Homo sapiens OX=9606 GN=NIPSNAP2 PE=1 SV=1	ENSG00000146729	GBAS; NIPSNAP2	0.002	-1.77629	-1.41831	0.10582	0.658024	0.526821	0.738163	0.411829	0.861802	0.93212	-4.41189	-2.602	0.0844786	0.973331	0.0884786	0.486692	2.62237	0.0568084	0.447765
+pH fractionation/SP	High	O75326		Semaphorin-7A OS=Homo sapiens OX=9606 GN=SEMA7A PE=1 SV=1	ENSG00000138623	SEMA7A	0.002			N.D.	N.D.	N.D.	NA	0.124699	0.574849	0.764724		-3.62537	N.D.	1.25719	N.D.	NA	2.15585	0.12853	0.551937
+pH fractionation/SP	High	O75340		Programmed cell death protein 6 OS=Homo sapiens OX=9606 GN=PDCD6 PE=1 SV=1	ENSG00000249915	PDCD6	0	2.52106	2.63938	0.116786	0.440292	0.676077	0.825884	0.118325	0.676077	0.823244	1.03138	1.85741	0.374527	0.118623	0.0219301	0.298918	0.826028	0.0219301	0.309498
+pH fractionation/SP	High	O75347		Tubulin-specific chaperone A OS=Homo sapiens OX=9606 GN=TBCA PE=1 SV=3	ENSG00000171530	TBCA	0	1.0385	1.32805	0.355787	0.228156	0.301049	0.561284	0.289553	0.301049	0.559258	-0.546243	-0.339302	0.491621	0.222676	0.542931	0.855728	0.206941	0.542931	0.855944
+pH fractionation/SP	High	O75348		V-type proton ATPase subunit G 1 OS=Homo sapiens OX=9606 GN=ATP6V1G1 PE=1 SV=3	ENSG00000136888	ATP6V1G1	0.007	-3.35551	-4.61905	0.474836	1.4686	0.234313	0.494993	-1.72197	0.0985914	0.333829	-5.38074	-3.69326	0.627425	0.110121	0.0644403	0.456583	1.23979	0.321467	0.741918
+pH fractionation/SP	High	O75351		Vacuolar protein sorting-associated protein 4B OS=Homo sapiens OX=9606 GN=VPS4B PE=1 SV=2	ENSG00000119541	VPS4B	0	3.3244	3.13663	0.711187	0.15324	0.677977	0.827204	-0.187774	0.677977	0.824614	0.711328	1.06731	0.453847	0.637267	0.474716	0.826542	0.355982	0.474716	0.829887
+pH fractionation/SP	High	O75352		Mannose-P-dolichol utilization defect 1 protein OS=Homo sapiens OX=9606 GN=MPDU1 PE=1 SV=2	ENSG00000129255	MPDU1	0.002	-0.788974	0.936298	0.221632	0.149821	0.000365636	0.0373578	1.72527	0.000365636	0.0354238	-2.19705	-2.02204	0.274131	0.9923	0.775685	0.936383	-1.34707	0.442733	0.817342
+pH fractionation/SP	High	O75367		Core histone macro-H2A.1 OS=Homo sapiens OX=9606 GN=H2AFY PE=1 SV=4	ENSG00000113648	H2AFY	0	1.54104	1.73656	0.293337	0.289044	0.457075	0.687975	0.195523	0.457075	0.683218	7.00823	7.64731	0.0834682	0.141791	0.00254284	0.151527	0.639078	0.00254284	0.150738
+pH fractionation/SP	High	O75368		SH3 domain-binding glutamic acid-rich-like protein OS=Homo sapiens OX=9606 GN=SH3BGRL PE=1 SV=1	ENSG00000131171	SH3BGRL	0	1.62363	2.47074	0.494753	0.55409	0.119458	0.356765	0.847105	0.119458	0.362306	-1.84407	-1.32566	0.510814	0.603368	0.319478	0.739508	0.518411	0.319478	0.741588
+pH fractionation/SP	High	O75369-8		Isoform 8 of Filamin-B OS=Homo sapiens OX=9606 GN=FLNB	ENSG00000136068	FLNB	0	5.94663	5.08063	0.154017	0.211622	0.00459098	0.0919344	-0.865994	0.00459098	0.09046	6.50466	5.4668	0.237591	0.336811	0.0120499	0.249391	-1.03786	0.0120499	0.259106
+pH fractionation/SP	High	O75376		Nuclear receptor corepressor 1 OS=Homo sapiens OX=9606 GN=NCOR1 PE=1 SV=2	ENSG00000141027	NCOR1	0.002	-4.33466	-3.53015	1.36241	0.334695	0.376804	0.628387	0.804515	0.376804	0.622236	-2.97784	-2.5096	1.00247	0.0279566	0.575398	0.868047	-0.836512	0.589325	0.873267
+pH fractionation/SP	High	O75380		NADH dehydrogenase [ubiquinone] iron-sulfur protein 6, mitochondrial OS=Homo sapiens OX=9606 GN=NDUFS6 PE=1 SV=1	ENSG00000145494	NDUFS6	0	-0.686175	-0.436752	0.138102	0.206	0.156484	0.408024	0.249424	0.156484	0.413212	-3.15468	-3.32817	0.0620949	1.67426	0.898276	0.973071	0.977006	0.551084	0.858377
+pH fractionation/SP	High	O75381		Peroxisomal membrane protein PEX14 OS=Homo sapiens OX=9606 GN=PEX14 PE=1 SV=1	ENSG00000142655	PEX14	0.001	-2.73114	-2.29244	1.08577	0.592882	0.572289	0.766227	0.438696	0.572289	0.762798	-3.51927	-4.27602	N.D.	1.40119	N.D.	NA	0.710991	0.649834	0.898358
+pH fractionation/SP	High	O75390		Citrate synthase, mitochondrial OS=Homo sapiens OX=9606 GN=CS PE=1 SV=2	ENSG00000062485	CS	0	4.83986	4.92465	0.146913	0.450617	0.772149	0.883559	0.0847868	0.772149	0.881007	3.35951	3.83011	0.288752	0.363438	0.153931	0.584537	0.470604	0.153931	0.583709
+pH fractionation/SP	High	O75391		Sperm-associated antigen 7 OS=Homo sapiens OX=9606 GN=SPAG7 PE=1 SV=2	ENSG00000091640	SPAG7	0.001	-1.16085	-1.45432	0.201426	0.0833457	0.080097	0.292068	-0.293466	0.080097	0.302608	-2.5013	-3.94754	0.572223	1.04345	0.103079	0.51538	-1.44624	0.103079	0.520254
+pH fractionation/SP	High	O75394		39S ribosomal protein L33, mitochondrial OS=Homo sapiens OX=9606 GN=MRPL33 PE=1 SV=1	ENSG00000243147	MRPL33	0.008	-4.08064	-3.60594	0.235319	0.679412	0.316609	0.577685	0.4747	0.316609	0.573951	-4.92024	-3.98348	3.1884	N.D.	N.D.	NA	-0.0959335	0.95585	0.987661
+pH fractionation/SP	High	O75396		Vesicle-trafficking protein SEC22b OS=Homo sapiens OX=9606 GN=SEC22B PE=1 SV=4		SEC22B	0	1.27951	1.66075	0.178579	0.359287	0.175146	0.435015	0.381245	0.175146	0.43941	-0.587889	-0.0531516	1.1383	0.506885	0.498588	0.836645	0.534738	0.498588	0.837575
+pH fractionation/SP	High	O75400		Pre-mRNA-processing factor 40 homolog A OS=Homo sapiens OX=9606 GN=PRPF40A PE=1 SV=2		PRPF40A	0	2.59095	2.31666	0.203506	0.0863404	0.098082	0.324197	-0.274292	0.098082	0.332764	4.96059	4.83524	0.119109	0.140225	0.303334	0.721804	-0.125358	0.303334	0.722807
+pH fractionation/SP	High	O75400-3		Isoform 3 of Pre-mRNA-processing factor 40 homolog A OS=Homo sapiens OX=9606 GN=PRPF40A		PRPF40A	0			N.D.	N.D.	N.D.	NA	0.220957	0.22913	0.494088	-2.10543	-1.77997	0.691904	0.173765	0.584937	0.870569	0.23426	0.920123	0.978777
+pH fractionation/SP	High	O75410-2		Isoform 2 of Transforming acidic coiled-coil-containing protein 1 OS=Homo sapiens OX=9606 GN=TACC1		TACC1	0.002	-2.94781	-4.56781	0.952928	N.D.	N.D.	NA	-2.62169	0.0243675	0.1798	-3.8436	-4.36839	N.D.	1.4613	N.D.	NA	0.838	0.568486	0.866043
+pH fractionation/SP	High	O75419-3		Isoform 3 of Cell division control protein 45 homolog OS=Homo sapiens OX=9606 GN=CDC45	ENSG00000093009	CDC45	0	-0.495233	-2.72715	0.0346278	1.1445	0.027884	0.181832	-2.23192	0.027884	0.188208	-1.13752	-2.09419	0.495747	0.345794	0.05183	0.425323	-0.95667	0.05183	0.435253
+pH fractionation/SP	High	O75431		Metaxin-2 OS=Homo sapiens OX=9606 GN=MTX2 PE=1 SV=1	ENSG00000128654	MTX2	0.001	-0.42241	-1.76808	0.53941	1.72245	0.266158	0.529233	-1.34567	0.266158	0.529732	-3.64389	-1.59286	1.1427	0.672418	0.112693	0.527529	0.415311	0.827439	0.955087
+pH fractionation/SP	High	O75436		Vacuolar protein sorting-associated protein 26A OS=Homo sapiens OX=9606 GN=VPS26A PE=1 SV=2	ENSG00000122958	VPS26A	0	1.57761	2.12768	0.098945	0.24789	0.0233843	0.170797	0.550071	0.0233843	0.176432	2.29327	0.902593	1.66778	1.36327	0.326093	0.742254	-1.39067	0.326093	0.743982
+pH fractionation/SP	High	O75439		Mitochondrial-processing peptidase subunit beta OS=Homo sapiens OX=9606 GN=PMPCB PE=1 SV=2	ENSG00000105819	PMPCB	0	2.65876	2.54042	0.095872	0.0852116	0.185281	0.445271	-0.118342	0.185281	0.449353	1.45971	1.53652	1.18627	0.525443	0.923264	0.980131	0.0768093	0.923264	0.979932
+pH fractionation/SP	High	O75446		Histone deacetylase complex subunit SAP30 OS=Homo sapiens OX=9606 GN=SAP30 PE=1 SV=1	ENSG00000164105	SAP30	0.001	-5.21252	-4.29431	0.486753	0.455567	0.075535	0.283168	0.918211	0.075535	0.294363	-1.67429	-2.0511	0.963405	0.82828	0.634539	0.887018	-0.376811	0.634539	0.892127
+pH fractionation/SP	High	O75448		Mediator of RNA polymerase II transcription subunit 24 OS=Homo sapiens OX=9606 GN=MED24 PE=1 SV=1	ENSG00000008838	MED24	0.005	-4.95429	-4.07011	1.33172	1.27589	0.453012	0.684862	0.884183	0.453012	0.680182	-2.50322	-3.40774	0.0353886	0.81339	0.126646	0.545553	-0.904517	0.126646	0.548908
+pH fractionation/SP	High	O75449		Katanin p60 ATPase-containing subunit A1 OS=Homo sapiens OX=9606 GN=KATNA1 PE=1 SV=1	ENSG00000186625	KATNA1	0	-1.11331	-0.925531	0.0606549	0.514097	0.563903	0.760308	0.187779	0.563903	0.756979	-1.93727	-1.66316	0.530245	0.656221	0.60365	0.877278	0.274113	0.60365	0.879753
+pH fractionation/SP	High	O75475		PC4 and SFRS1-interacting protein OS=Homo sapiens OX=9606 GN=PSIP1 PE=1 SV=1	ENSG00000164985	PSIP1	0	2.31557	2.60702	0.135385	0.248652	0.149162	0.400488	0.291447	0.149162	0.405553	6.12247	5.56566	0.542265	0.572902	0.288599	0.709704	-0.556806	0.288599	0.708168
+pH fractionation/SP	High	O75477		Erlin-1 OS=Homo sapiens OX=9606 GN=ERLIN1 PE=1 SV=1		ERLIN1	0	0.24902	-1.22629	0.246601	1.30611	0.12691	0.368779	-1.47531	0.12691	0.37432	-1.95866	-1.7161	0.535729	0.841065	0.695176	0.911794	0.242567	0.695176	0.917901
+pH fractionation/SP	High	O75489		NADH dehydrogenase [ubiquinone] iron-sulfur protein 3, mitochondrial OS=Homo sapiens OX=9606 GN=NDUFS3 PE=1 SV=1	ENSG00000213619	NDUFS3	0	1.207	1.42049	0.486133	0.613398	0.661228	0.818578	0.213491	0.661228	0.816303	-1.42828	-1.10812	0.814507	0.732842	0.639403	0.888756	0.320153	0.639403	0.894762
+pH fractionation/SP	High	O75494		Serine/arginine-rich splicing factor 10 OS=Homo sapiens OX=9606 GN=SRSF10 PE=1 SV=1	ENSG00000188529	SRSF10; LOC100996657	0	0.575658	0.0942848	0.14431	0.255039	0.0466188	0.222918	-0.481373	0.0466188	0.232214	4.84223	4.5359	0.307968	0.492942	0.412969	0.794488	-0.306328	0.412969	0.801987
+pH fractionation/SP	High	O75496		Geminin OS=Homo sapiens OX=9606 GN=GMNN PE=1 SV=1	ENSG00000112312	GMNN	0.004	-0.970232	-2.65438	1.06246	1.33637	0.210253	0.473615	-2.84783	0.116153	0.35818	-4.02665	-4.36777	0.70317	2.54117	0.871693	0.964903	-0.103791	0.950564	0.985207
+pH fractionation/SP	High	O75503		Ceroid-lipofuscinosis neuronal protein 5 OS=Homo sapiens OX=9606 GN=CLN5 PE=1 SV=2	ENSG00000102805	CLN5	0.003	-3.611	-3.28996	0.312359	0.411297	0.342226	0.601734	0.321046	0.342226	0.59658	-6.17288		2.42923	N.D.	N.D.	NA	-0.16294	0.878879	0.968279
+pH fractionation/SP	High	O75521		Enoyl-CoA delta isomerase 2, mitochondrial OS=Homo sapiens OX=9606 GN=ECI2 PE=1 SV=4	ENSG00000198721	ECI2	0	1.86917	1.67442	0.180964	0.258746	0.345564	0.604428	-0.194751	0.345564	0.600019	0.231806	0.478119	0.624625	0.769422	0.689026	0.909362	0.246313	0.689026	0.915365
+pH fractionation/SP	High	O75525		KH domain-containing, RNA-binding, signal transduction-associated protein 3 OS=Homo sapiens OX=9606 GN=KHDRBS3 PE=1 SV=1	ENSG00000131773	KHDRBS3	0	-0.596334	-0.283853	0.226391	0.331323	0.248715	0.510711	0.312481	0.248715	0.512335	3.78279	2.47489	0.626492	0.843548	0.097331	0.504903	-1.3079	0.097331	0.508913
+pH fractionation/SP	High	O75530		Polycomb protein EED OS=Homo sapiens OX=9606 GN=EED PE=1 SV=2	ENSG00000074266	EED	0	-0.210953	-0.961583	0.143306	0.43405	0.0466627	0.222918	-0.75063	0.0466627	0.232214	3.53188	3.12527	0.309542	0.513195	0.305131	0.722122	-0.406604	0.305131	0.723078
+pH fractionation/SP	High	O75531		Barrier-to-autointegration factor OS=Homo sapiens OX=9606 GN=BANF1 PE=1 SV=1	ENSG00000175334	BANF1	0	0.99247	1.16635	1.53331	1.22314	0.885404	0.946663	0.173876	0.885404	0.944788	0.405647	0.53343	0.492051	0.847253	0.832355	0.951777	0.127783	0.832355	0.955278
+pH fractionation/SP	High	O75533		Splicing factor 3B subunit 1 OS=Homo sapiens OX=9606 GN=SF3B1 PE=1 SV=3	ENSG00000115524	SF3B1	0	5.63292	4.62	0.696606	0.200323	0.0727278	0.277117	-1.01292	0.0727278	0.288542	6.67603	6.45731	0.199508	0.0466884	0.138156	0.561418	-0.218729	0.138156	0.561469
+pH fractionation/SP	High	O75534-4		Isoform 4 of Cold shock domain-containing protein E1 OS=Homo sapiens OX=9606 GN=CSDE1	ENSG00000009307	CSDE1	0	5.57436	4.39581	0.336114	0.354426	0.0139285	0.139918	-1.17855	0.0139285	0.142059	4.29483	3.95649	0.0277385	0.24342	0.0750071	0.467839	-0.33834	0.0750071	0.475706
+pH fractionation/SP	High	O75554		WW domain-binding protein 4 OS=Homo sapiens OX=9606 GN=WBP4 PE=1 SV=1	ENSG00000120688	WBP4	0.002	-3.96115		1.25226	N.D.	N.D.	NA	-2.18896	0.0391358	0.218878	-1.90941	-5.1719	N.D.	N.D.	N.D.	NA	-0.924543	0.619384	0.885451
+pH fractionation/SP	High	O75569		Interferon-inducible double-stranded RNA-dependent protein kinase activator A OS=Homo sapiens OX=9606 GN=PRKRA PE=1 SV=1	ENSG00000180228	PRKRA	0	1.23691	1.68819	0.205263	0.351937	0.12749	0.369775	0.451282	0.12749	0.375363	2.52937	2.46287	0.286684	0.324452	0.803346	0.942207	-0.0665065	0.803346	0.94498
+pH fractionation/SP	High	O75582		Ribosomal protein S6 kinase alpha-5 OS=Homo sapiens OX=9606 GN=RPS6KA5 PE=1 SV=1	ENSG00000100784	RPS6KA5	0.008	-3.13176	-3.6749	0.396663	0.792702	0.348382	0.605766	-0.543141	0.348382	0.601354	-4.59278	-5.95957	0.433041	1.92229	0.28889	0.709704	-1.51398	0.144631	0.573043
+pH fractionation/SP	High	O75586-2		Isoform 2 of Mediator of RNA polymerase II transcription subunit 6 OS=Homo sapiens OX=9606 GN=MED6	ENSG00000133997	MED6	0.007	-4.99473	-8.62329	2.47556	N.D.	N.D.	NA	-1.94539	0.305929	0.564047		-8.02097	N.D.	1.13652	N.D.	NA	-0.5644	0.482136	0.833616
+pH fractionation/SP	High	O75592		E3 ubiquitin-protein ligase MYCBP2 OS=Homo sapiens OX=9606 GN=MYCBP2 PE=1 SV=3	ENSG00000005810	MYCBP2	0	-1.53735	-0.983802	0.330369	0.22541	0.074576	0.280887	0.553547	0.074576	0.292089	-3.17663	-2.73407	0.960851	1.21496	0.646643	0.891	0.442563	0.646643	0.898144
+pH fractionation/SP	High	O75600-2		Isoform 2 of 2-amino-3-ketobutyrate coenzyme A ligase, mitochondrial OS=Homo sapiens OX=9606 GN=GCAT	ENSG00000100116	GCAT	0.001	-0.837244	-2.26499	0.112111	2.12347	0.309498	0.570341	-1.42775	0.309498	0.567082	-1.9438	-3.50945	1.28724	1.46031	0.236033	0.674342	-1.56566	0.236033	0.672725
+pH fractionation/SP	High	O75607		Nucleoplasmin-3 OS=Homo sapiens OX=9606 GN=NPM3 PE=1 SV=3	ENSG00000107833	NPM3	0	1.16065	0.977442	0.101661	0.0761384	0.0668812	0.264407	-0.183208	0.0668812	0.275947	4.29461	3.5306	0.289842	0.463479	0.0727029	0.466101	-0.764008	0.0727029	0.472649
+pH fractionation/SP	High	O75608		Acyl-protein thioesterase 1 OS=Homo sapiens OX=9606 GN=LYPLA1 PE=1 SV=1	ENSG00000120992	LYPLA1	0	0.478386	0.882303	0.614395	0.494288	0.425091	0.665252	0.403917	0.425091	0.660322	-2.02794	-1.37978	0.747547	0.495219	0.278792	0.70875	0.648157	0.278792	0.70557
+pH fractionation/SP	High	O75616		GTPase Era, mitochondrial OS=Homo sapiens OX=9606 GN=ERAL1 PE=1 SV=2	ENSG00000132591	ERAL1	0.001	-2.06022	-3.74771	0.196135	0.722727	0.0174972	0.150193	-1.68749	0.0174972	0.154816	-4.19197	-5.55437	0.920578	0.444015	0.15681	0.588258	-1.70831	0.0606753	0.460902
+pH fractionation/SP	High	O75643		U5 small nuclear ribonucleoprotein 200 kDa helicase OS=Homo sapiens OX=9606 GN=SNRNP200 PE=1 SV=2	ENSG00000144028	SNRNP200	0	5.5224	5.20457	0.0944883	0.401456	0.252855	0.514865	-0.317831	0.252855	0.516657	7.97694	7.61481	0.0171227	0.161397	0.0180757	0.284886	-0.362137	0.0180757	0.29386
+pH fractionation/SP	High	O75648		Mitochondrial tRNA-specific 2-thiouridylase 1 OS=Homo sapiens OX=9606 GN=TRMU PE=1 SV=2	ENSG00000100416	TRMU	0.002	-3.78684	-4.59677	0.311115	N.D.	N.D.	NA	-1.78084	0.0267171	0.18622	-3.18747	-6.07637	N.D.	0.265163	N.D.	NA	-0.758765	0.555391	0.860036
+pH fractionation/SP	High	O75663		TIP41-like protein OS=Homo sapiens OX=9606 GN=TIPRL PE=1 SV=2	ENSG00000143155	TIPRL	0	3.14531	2.80235	0.246395	0.453093	0.313573	0.574626	-0.342964	0.313573	0.570749	0.579322	0.797567	0.551281	0.301609	0.579903	0.869691	0.218245	0.579903	0.870776
+pH fractionation/SP	High	O75683		Surfeit locus protein 6 OS=Homo sapiens OX=9606 GN=SURF6 PE=1 SV=3	ENSG00000281309	SURF6	0	-1.61693	-1.26529	0.694213	0.977684	0.638223	0.805037	0.351644	0.638223	0.802936	3.60294	3.09904	0.585642	0.14954	0.222237	0.667716	-0.503908	0.222237	0.667399
+pH fractionation/SP	High	O75688		Protein phosphatase 1B OS=Homo sapiens OX=9606 GN=PPM1B PE=1 SV=1	ENSG00000138032	PPM1B	0	-0.99339	-0.973214	0.141248	0.469061	0.946553	0.975737	0.0201764	0.946553	0.975063	-1.90577	-4.07861	1.15713	1.175	0.0845889	0.482689	-2.17284	0.0845889	0.48838
+pH fractionation/SP	High	O75691		Small subunit processome component 20 homolog OS=Homo sapiens OX=9606 GN=UTP20 PE=1 SV=3	ENSG00000120800	UTP20	0	1.20801	1.76792	0.811437	0.522765	0.371884	0.624266	0.559914	0.371884	0.618559	5.14782	4.23431	0.083194	0.0949582	0.0002332	0.0523944	-0.91351	0.0002332	0.0488644
+pH fractionation/SP	High	O75694		Nuclear pore complex protein Nup155 OS=Homo sapiens OX=9606 GN=NUP155 PE=1 SV=1	ENSG00000113569	NUP155	0	1.92693	1.47897	0.507409	0.418775	0.303613	0.563602	-0.447965	0.303613	0.561318	4.39988	3.88469	0.301298	0.59224	0.250437	0.689184	-0.515192	0.250437	0.686039
+pH fractionation/SP	High	O75695		Protein XRP2 OS=Homo sapiens OX=9606 GN=RP2 PE=1 SV=4	ENSG00000102218	RP2	0	0.436462	1.26045	0.10851	0.432663	0.0329152	0.197738	0.823991	0.0329152	0.204394	1.91803	1.38913	0.621462	0.598018	0.348032	0.751865	-0.5289	0.348032	0.754385
+pH fractionation/SP	High	O75717		WD repeat and HMG-box DNA-binding protein 1 OS=Homo sapiens OX=9606 GN=WDHD1 PE=1 SV=1	ENSG00000198554	WDHD1	0	1.71819	0.549668	0.127628	0.159348	0.000581212	0.041078	-1.16852	0.000581212	0.0402371	0.607997	-0.120621	0.159617	0.147421	0.00437209	0.183757	-0.728617	0.00437209	0.190521
+pH fractionation/SP	High	O75746		Calcium-binding mitochondrial carrier protein Aralar1 OS=Homo sapiens OX=9606 GN=SLC25A12 PE=1 SV=2	ENSG00000115840	SLC25A12	0	1.4475	1.56778	0.13885	0.171019	0.397866	0.645006	0.120273	0.397866	0.639255	0.121084	-0.145517	0.153182	0.176872	0.119689	0.539589	-0.266601	0.119689	0.543271
+pH fractionation/SP	High	O75787		Renin receptor OS=Homo sapiens OX=9606 GN=ATP6AP2 PE=1 SV=2	ENSG00000182220	ATP6AP2	0	-0.84435	-2.37786	0.477317	0.721077	0.0372362	0.207607	-1.53351	0.0372362	0.215306	-2.39062	-2.93855	0.606705	1.73735	0.708805	0.912864	0.956601	0.627891	0.889569
+pH fractionation/SP	High	O75791		GRB2-related adapter protein 2 OS=Homo sapiens OX=9606 GN=GRAP2 PE=1 SV=1	ENSG00000100351	GRAP2	0	2.147	3.0789	0.489262	0.249151	0.0423971	0.214034	0.9319	0.0423971	0.222769	-0.460832	0.782347	1.12591	0.577082	0.163984	0.601549	1.24318	0.163984	0.601844
+pH fractionation/SP	High	O75792		Ribonuclease H2 subunit A OS=Homo sapiens OX=9606 GN=RNASEH2A PE=1 SV=2	ENSG00000104889	RNASEH2A	0	2.6757	1.84023	0.208575	0.31485	0.0185924	0.1554	-0.835474	0.0185924	0.160082	0.604928	0.52067	0.760853	0.83213	0.903264	0.973397	-0.0842575	0.903264	0.972777
+pH fractionation/SP	High	O75794		Cell division cycle protein 123 homolog OS=Homo sapiens OX=9606 GN=CDC123 PE=1 SV=1	ENSG00000151465	CDC123	0	1.53455	0.059423	0.258028	0.814832	0.0403659	0.211558	-1.47512	0.0403659	0.220699	-0.605004	-0.267665	0.284899	0.398855	0.299128	0.71818	0.337339	0.299128	0.718837
+pH fractionation/SP	High	O75818		Ribonuclease P protein subunit p40 OS=Homo sapiens OX=9606 GN=RPP40 PE=1 SV=3	ENSG00000124787	RPP40	0	0.940175	0.819375	0.333403	0.29223	0.661566	0.818578	-0.120799	0.661566	0.816303	1.22428	1.02942	0.520218	0.455986	0.651174	0.891842	-0.194854	0.651174	0.898358
+pH fractionation/SP	High	O75820		Zinc finger protein 189 OS=Homo sapiens OX=9606 GN=ZNF189 PE=1 SV=2	ENSG00000136870	ZNF189	0	-5.28709	-5.09493	N.D.	0.509062	N.D.	NA	0.624423	0.279027	0.541051	-3.59901	-2.74671	2.44457	2.11086	0.716448	0.916107	-0.347679	0.873139	0.96611
+pH fractionation/SP	High	O75821		Eukaryotic translation initiation factor 3 subunit G OS=Homo sapiens OX=9606 GN=EIF3G PE=1 SV=2	ENSG00000130811	EIF3G	0	4.08321	3.33587	0.189774	0.535543	0.0849519	0.300631	-0.74734	0.0849519	0.31015	2.52941	1.95646	0.391162	0.329945	0.124486	0.544318	-0.572948	0.124486	0.547887
+pH fractionation/SP	High	O75822		Eukaryotic translation initiation factor 3 subunit J OS=Homo sapiens OX=9606 GN=EIF3J PE=1 SV=2	ENSG00000104131	EIF3J	0	2.95683	1.68963	0.710187	1.02485	0.153166	0.405165	-1.2672	0.153166	0.410047	0.598954	-0.209979	0.7873	1.46329	0.446584	0.814328	-0.808933	0.446584	0.81855
+pH fractionation/SP	High	O75832		26S proteasome non-ATPase regulatory subunit 10 OS=Homo sapiens OX=9606 GN=PSMD10 PE=1 SV=1	ENSG00000101843	PSMD10	0	0.986605	0.365159	0.183875	0.680013	0.201233	0.462519	-0.621446	0.201233	0.465425	-2.47933	-1.39625	0.790781	0.90566	0.193711	0.639014	1.08307	0.193711	0.637897
+pH fractionation/SP	High	O75843		AP-1 complex subunit gamma-like 2 OS=Homo sapiens OX=9606 GN=AP1G2 PE=1 SV=1	ENSG00000213983	AP1G2	0.001	-3.08783	-2.20942	1.53801	1.12253	0.469022	0.698408	0.878409	0.469022	0.693583	-1.27054	-5.92839	1.28915	0.61901	0.00486052	0.186708	-4.65785	0.00486052	0.194535
+pH fractionation/SP	High	O75844		CAAX prenyl protease 1 homolog OS=Homo sapiens OX=9606 GN=ZMPSTE24 PE=1 SV=2	ENSG00000084073	ZMPSTE24	0	2.89154	2.77754	0.144785	0.173498	0.431545	0.669079	-0.114003	0.431545	0.664567	2.29682	2.323	0.433083	0.491647	0.948146	0.9853	0.0261796	0.948146	0.985188
+pH fractionation/SP	High	O75874		Isocitrate dehydrogenase [NADP] cytoplasmic OS=Homo sapiens OX=9606 GN=IDH1 PE=1 SV=2	ENSG00000138413	IDH1	0	2.47112	3.01169	0.237355	0.235034	0.048663	0.226155	0.540568	0.048663	0.235836	-0.926968	-0.798591	0.173154	0.405377	0.640482	0.889441	0.128377	0.640482	0.895136
+pH fractionation/SP	High	O75879		Glutamyl-tRNA(Gln) amidotransferase subunit B, mitochondrial OS=Homo sapiens OX=9606 GN=GATB PE=1 SV=1	ENSG00000059691	PET112; GATB	0.001	-1.01332	-1.97834	0.535008	1.683	0.3975	0.644964	-0.96502	0.3975	0.639168	-3.37592	-2.83928	2.677	0.212691	0.804041	0.942207	0.522528	0.805684	0.945683
+pH fractionation/SP	High	O75880		Protein SCO1 homolog, mitochondrial OS=Homo sapiens OX=9606 GN=SCO1 PE=1 SV=1	ENSG00000133028	SCO1	0.001	-1.69762	-1.53175	0.741944	0.424611	0.753696	0.872834	0.165876	0.753696	0.870616	-2.46553	-2.5994	2.25569	0.453049	0.920585	0.979373	1.2683	0.496566	0.837212
+pH fractionation/SP	High	O75886		Signal transducing adapter molecule 2 OS=Homo sapiens OX=9606 GN=STAM2 PE=1 SV=1	ENSG00000115145	STAM2	0	-2.24066	-2.22816	0.206907	0.620837	0.980682	0.991009	1.38193	0.384987	0.628517	-5.64282	-4.76386	1.09883	N.D.	N.D.	NA	0.0637151	0.939723	0.983694
+pH fractionation/SP	High	O75909		Cyclin-K OS=Homo sapiens OX=9606 GN=CCNK PE=1 SV=2	ENSG00000090061	CCNK	0	0.178383	-0.132151	0.475415	0.341446	0.410141	0.653994	-0.310533	0.410141	0.648504	0.661858	0.255771	0.166208	0.381489	0.16624	0.603493	-0.406087	0.16624	0.603577
+pH fractionation/SP	High	O75915		PRA1 family protein 3 OS=Homo sapiens OX=9606 GN=ARL6IP5 PE=1 SV=1	ENSG00000144746	ARL6IP5	0	1.51109	2.29091	0.388723	0.56698	0.120886	0.358709	0.77982	0.120886	0.364079	-0.94177	0.123945	0.239106	0.694888	0.0659292	0.457989	1.06572	0.0659292	0.464479
+pH fractionation/SP	High	O75925-2		Isoform 2 of E3 SUMO-protein ligase PIAS1 OS=Homo sapiens OX=9606 GN=PIAS1	ENSG00000033800	PIAS1	0	-1.22402	-1.35158	0.324719	0.0840261	0.546062	0.748139	-0.127562	0.546062	0.744235	-0.409112	-0.213853	0.457622	0.669538	0.698071	0.911794	0.195259	0.698071	0.918099
+pH fractionation/SP	High	O75928		E3 SUMO-protein ligase PIAS2 OS=Homo sapiens OX=9606 GN=PIAS2 PE=1 SV=3	ENSG00000078043	PIAS2	0.002	-4.35729	-5.75798	0.598564	1.07594	0.248921	0.510711	-0.851936	0.377206	0.622236	-4.21072	-4.25164	1.06342	0.171286	0.962321	0.989739	-0.826459	0.454766	0.822957
+pH fractionation/SP	High	O75934		Pre-mRNA-splicing factor SPF27 OS=Homo sapiens OX=9606 GN=BCAS2 PE=1 SV=1	ENSG00000116752	BCAS2	0	0.359038	-0.837452	0.192776	0.615233	0.0324543	0.196508	-1.19649	0.0324543	0.203339	1.86592	1.64148	0.409975	0.431231	0.549198	0.857951	-0.224437	0.549198	0.85761
+pH fractionation/SP	High	O75937		DnaJ homolog subfamily C member 8 OS=Homo sapiens OX=9606 GN=DNAJC8 PE=1 SV=2	ENSG00000126698	DNAJC8	0	1.42728	0.982626	0.226579	0.263362	0.0909321	0.311353	-0.444653	0.0909321	0.321078	2.67954	2.07917	0.447732	0.33297	0.13582	0.558795	-0.600377	0.13582	0.559897
+pH fractionation/SP	High	O75940		Survival of motor neuron-related-splicing factor 30 OS=Homo sapiens OX=9606 GN=SMNDC1 PE=1 SV=1	ENSG00000119953	SMNDC1	0	0.283696	0.515761	0.821403	0.940959	0.763716	0.87943	0.232065	0.763716	0.876853	3.15371	2.47088	0.418078	0.401758	0.110976	0.524206	-0.682829	0.110976	0.530843
+pH fractionation/SP	High	O75943		Cell cycle checkpoint protein RAD17 OS=Homo sapiens OX=9606 GN=RAD17 PE=1 SV=2	ENSG00000152942	RAD17	0.002	-3.2875	-4.11135	0.625978	0.388734	0.124875	0.364612	-0.823847	0.124875	0.370004	-5.40482		1.98546	N.D.	N.D.	NA	-0.662588	0.510116	0.840328
+pH fractionation/SP	High	O75947		ATP synthase subunit d, mitochondrial OS=Homo sapiens OX=9606 GN=ATP5H PE=1 SV=3	ENSG00000167863	ATP5H	0	2.34628	2.05392	0.445853	0.245606	0.376138	0.628387	-0.292359	0.376138	0.622236	0.866463	0.599998	0.798145	0.80374	0.704536	0.911914	-0.266465	0.704536	0.918853
+pH fractionation/SP	High	O75955		Flotillin-1 OS=Homo sapiens OX=9606 GN=FLOT1 PE=1 SV=3	ENSG00000206379	FLOT1	0	-1.15965	-0.147969	0.702618	0.360687	0.0907464	0.311128	1.01168	0.0907464	0.320892	1.00315	1.61674	0.435684	0.123454	0.0787809	0.47338	0.613589	0.0787809	0.481621
+pH fractionation/SP	High	O75964		ATP synthase subunit g, mitochondrial OS=Homo sapiens OX=9606 GN=ATP5L PE=1 SV=3	ENSG00000167283	ATP5L	0.001	0.446151	1.14048	0.347451	0.27493	0.0533005	0.236749	0.694328	0.0533005	0.247112	-3.70659	-2.95026	0.379108	0.933005	0.263211	0.700289	0.756323	0.263211	0.695789
+pH fractionation/SP	High	O75976		Carboxypeptidase D OS=Homo sapiens OX=9606 GN=CPD PE=1 SV=2	ENSG00000108582	CPD	0	-1.58879	-2.5623	0.354997	0.402598	0.0348009	0.202486	-0.973509	0.0348009	0.209747	-6.48399	-10.5129	2.50451	N.D.	N.D.	NA	-1.3197	0.542031	0.855944
+pH fractionation/SP	High	O75995		SAM and SH3 domain-containing protein 3 OS=Homo sapiens OX=9606 GN=SASH3 PE=1 SV=2	ENSG00000122122	SASH3	0	1.52576	3.03365	0.267676	0.151609	0.00105535	0.0562816	1.5079	0.00105535	0.0557087	-1.69829	-0.493174	0.430878	0.499825	0.0340845	0.363359	1.20511	0.0340845	0.375516
+pH fractionation/SP	High	O76003		Glutaredoxin-3 OS=Homo sapiens OX=9606 GN=GLRX3 PE=1 SV=2	ENSG00000108010	GLRX3	0	3.3965	2.88357	0.364288	0.350004	0.153462	0.405165	-0.512934	0.153462	0.410047	1.0206	1.14524	0.273235	0.287091	0.6149	0.880408	0.124641	0.6149	0.884094
+pH fractionation/SP	High	O76021		Ribosomal L1 domain-containing protein 1 OS=Homo sapiens OX=9606 GN=RSL1D1 PE=1 SV=3	ENSG00000171490	RSL1D1	0	1.14964	1.3149	0.749793	0.103623	0.72453	0.85349	0.165255	0.72453	0.852349	6.85225	6.30175	0.457977	0.117963	0.113996	0.529344	-0.550498	0.113996	0.536648
+pH fractionation/SP	High	O76024		Wolframin OS=Homo sapiens OX=9606 GN=WFS1 PE=1 SV=2	ENSG00000109501	WFS1	0.008	-4.64567	-3.49901	0.257903	0.827684	0.083773	0.298453	1.14666	0.083773	0.307869	-4.01156	-4.03476	1.01867	0.0469218	0.970462	0.992325	-0.0231952	0.970462	0.991668
+pH fractionation/SP	High	O76031		ATP-dependent Clp protease ATP-binding subunit clpX-like, mitochondrial OS=Homo sapiens OX=9606 GN=CLPX PE=1 SV=2	ENSG00000166855	CLPX	0	2.36449	1.42789	0.0393259	0.237025	0.00250887	0.0767917	-0.936595	0.00250887	0.0784724	1.15332	1.109	0.920802	0.304112	0.940705	0.984423	-0.0443209	0.940705	0.983947
+pH fractionation/SP	High	O76062		Delta(14)-sterol reductase OS=Homo sapiens OX=9606 GN=TM7SF2 PE=2 SV=3	ENSG00000149809	TM7SF2	0.002	-3.22368	-1.55395	1.21696	0.410571	0.0874748	0.304641	1.66973	0.0874748	0.314259	-1.97346	-2.13188	0.754525	1.46368	0.875746	0.966627	-0.158419	0.875746	0.966907
+pH fractionation/SP	High	O76071		Probable cytosolic iron-sulfur protein assembly protein CIAO1 OS=Homo sapiens OX=9606 GN=CIAO1 PE=1 SV=1	ENSG00000144021	CIAO1	0	2.14563	0.943035	0.376195	1.0335	0.131161	0.374992	-1.2026	0.131161	0.380918	0.14548	-0.161396	0.945894	1.53252	0.782572	0.936383	-0.306876	0.782572	0.940755
+pH fractionation/SP	High	O76075		DNA fragmentation factor subunit beta OS=Homo sapiens OX=9606 GN=DFFB PE=1 SV=1	ENSG00000169598	DFFB	0.007	-4.58807	-4.41363	1.53608	2.51104	0.923188	0.964823	0.174438	0.923188	0.965268	-4.50865	-2.82921	1.14937	1.67863	0.225988	0.667758	1.67944	0.225988	0.667399
+pH fractionation/SP	High	O76080		AN1-type zinc finger protein 5 OS=Homo sapiens OX=9606 GN=ZFAND5 PE=1 SV=1	ENSG00000107372	ZFAND5	0.009	-4.61596	-5.28573	1.237	0.464741	0.431166	0.669079	-0.0632523	0.94316	0.97485	-5.42064		1.38392	N.D.	N.D.	NA	-1.04879	0.260199	0.692657
+pH fractionation/SP	High	O76094		Signal recognition particle subunit SRP72 OS=Homo sapiens OX=9606 GN=SRP72 PE=1 SV=3	ENSG00000174780	SRP72	0	3.80404	3.40916	0.248661	0.545304	0.317465	0.578369	-0.394881	0.317465	0.574487	2.2537	2.58061	0.839072	0.584145	0.609192	0.877984	0.326914	0.609192	0.881126
+pH fractionation/SP	High	O94762		ATP-dependent DNA helicase Q5 OS=Homo sapiens OX=9606 GN=RECQL5 PE=1 SV=2	ENSG00000108469	RECQL5	0.004	-6.09786	-4.64879	1.91689	0.153036	0.385826	0.635898	0.92984	0.489779	0.707597	-2.65938	-2.41216	0.824298	0.44366	0.731884	0.921826	-1.08654	0.489016	0.834524
+pH fractionation/SP	High	O94763		Unconventional prefoldin RPB5 interactor 1 OS=Homo sapiens OX=9606 GN=URI1 PE=1 SV=3	ENSG00000105176	URI1	0.001	-2.32284	-3.14868	0.471145	0.326313	0.0670649	0.264843	-0.825836	0.0670649	0.276407	-4.36825	-3.96249	1.9012	0.456339	0.737437	0.921826	0.405751	0.737437	0.9285
+pH fractionation/SP	High	O94768		Serine/threonine-protein kinase 17B OS=Homo sapiens OX=9606 GN=STK17B PE=1 SV=1	ENSG00000081320	STK17B	0	-3.28984	-1.19803	1.52994	1.97165	0.220197	0.482785	2.0918	0.220197	0.485756	-4.6503	-3.11947	0.223915	2.00675	0.3827	0.776588	2.20348	0.176156	0.618024
+pH fractionation/SP	High	O94776		Metastasis-associated protein MTA2 OS=Homo sapiens OX=9606 GN=MTA2 PE=1 SV=1	ENSG00000149480	MTA2	0	3.45213	2.96568	0.129738	0.239814	0.0365679	0.206164	-0.486454	0.0365679	0.21352	5.79004	5.69844	0.291321	0.253144	0.702074	0.911914	-0.0916011	0.702074	0.918698
+pH fractionation/SP	High	O94788		Retinal dehydrogenase 2 OS=Homo sapiens OX=9606 GN=ALDH1A2 PE=1 SV=3	ENSG00000128918	ALDH1A2	0	-0.723709	0.457506	0.418956	0.538731	0.0400266	0.211068	1.18121	0.0400266	0.220172	-1.97305	-1.25566	0.254921	0.255271	0.0261906	0.327242	0.717394	0.0261906	0.337971
+pH fractionation/SP	High	O94804		Serine/threonine-protein kinase 10 OS=Homo sapiens OX=9606 GN=STK10 PE=1 SV=1	ENSG00000072786	STK10	0.001	-4.45658	-2.42716	0.308252	0.647625	0.0080394	0.110461	2.02942	0.0080394	0.109918	-2.67745	-4.16109	0.589221	0.571753	0.035188	0.367536	-1.48364	0.035188	0.378714
+pH fractionation/SP	High	O94819		Kelch repeat and BTB domain-containing protein 11 OS=Homo sapiens OX=9606 GN=KBTBD11 PE=1 SV=1	ENSG00000176595	KBTBD11	0.005	-3.71536	-4.35989	0.237414	0.129378	0.0425021	0.214339	-1.18192	0.101165	0.337634	-6.10607	-5.71977	0.123784	0.159171	0.113502	0.529144	0.406807	0.318126	0.739454
+pH fractionation/SP	High	O94822-3		Isoform 3 of E3 ubiquitin-protein ligase listerin OS=Homo sapiens OX=9606 GN=LTN1	ENSG00000198862	LTN1	0.005	-5.3115	-4.43767	1.94451	1.42627	0.564299	0.760308	0.873832	0.564299	0.756979	-5.02993	-6.548	N.D.	N.D.	N.D.	NA	-0.425166	0.48484	0.833616
+pH fractionation/SP	High	O94826		Mitochondrial import receptor subunit TOM70 OS=Homo sapiens OX=9606 GN=TOMM70 PE=1 SV=1	ENSG00000154174	TOMM70A; TOMM70	0	0.343592	0.377296	0.212883	0.609042	0.932254	0.969786	0.033704	0.932254	0.969339	-1.90111	-0.548549	0.796288	0.452038	0.0627362	0.4534	1.35256	0.0627362	0.46179
+pH fractionation/SP	High	O94830		Phospholipase DDHD2 OS=Homo sapiens OX=9606 GN=DDHD2 PE=1 SV=2	ENSG00000085788	DDHD2	0.004	-3.63903	-5.17226	0.327834	1.56583	0.172253	0.43117	-1.53323	0.172253	0.435349		-4.67066	N.D.	0.840197	N.D.	NA	1.60916	0.0732124	0.472649
+pH fractionation/SP	High	O94832		Unconventional myosin-Id OS=Homo sapiens OX=9606 GN=MYO1D PE=1 SV=2	ENSG00000176658	MYO1D	0	-1.5442	-0.489734	0.373431	0.338541	0.0222884	0.168161	1.05447	0.0222884	0.173796	-0.327897	0.400231	0.545442	0.293506	0.111437	0.525313	0.728128	0.111437	0.532052
+pH fractionation/SP	High	O94842		TOX high mobility group box family member 4 OS=Homo sapiens OX=9606 GN=TOX4 PE=1 SV=1	ENSG00000092203	TOX4	0	-1.48481	-1.44306	0.383014	0.809173	0.939506	0.973327	0.0417466	0.939506	0.972931	1.78193	1.54034	0.265381	0.44638	0.465543	0.823472	-0.241592	0.465543	0.827652
+pH fractionation/SP	High	O94855-2		Isoform 2 of Protein transport protein Sec24D OS=Homo sapiens OX=9606 GN=SEC24D		SEC24D	0	-0.529519	-0.0784543	0.25597	0.38366	0.165525	0.420683	0.451065	0.165525	0.424416	-1.12879	-1.42464	1.4943	0.69607	0.77144	0.935287	-0.295849	0.77144	0.940301
+pH fractionation/SP	High	O94874		E3 UFM1-protein ligase 1 OS=Homo sapiens OX=9606 GN=UFL1 PE=1 SV=2	ENSG00000014123	UFL1	0	2.46335	2.76347	0.0641939	0.110354	0.0152022	0.146725	0.300117	0.0152022	0.14928	1.29494	1.40062	0.34142	0.315971	0.71404	0.915269	0.10568	0.71404	0.92165
+pH fractionation/SP	High	O94880		PHD finger protein 14 OS=Homo sapiens OX=9606 GN=PHF14 PE=1 SV=2	ENSG00000106443	PHF14	0	-0.411795	-0.252843	0.465048	0.217433	0.620195	0.795903	0.158952	0.620195	0.793521	2.63225	1.96012	0.292972	0.52621	0.125387	0.5446	-0.672132	0.125387	0.54796
+pH fractionation/SP	High	O94880-2		Isoform 2 of PHD finger protein 14 OS=Homo sapiens OX=9606 GN=PHF14		PHF14	0		-5.99839	N.D.	N.D.	N.D.	NA	0.37211	0.0626925	0.266092	-2.83072	-2.93188	0.268638	0.447753	0.754056	0.926604	-0.101164	0.754056	0.931495
+pH fractionation/SP	High	O94888		UBX domain-containing protein 7 OS=Homo sapiens OX=9606 GN=UBXN7 PE=1 SV=2	ENSG00000163960	UBXN7	0	-0.0100091	-1.17032	0.419307	0.418354	0.0274546	0.181832	-1.16031	0.0274546	0.188208	-1.61205	-2.22633	1.28811	0.744923	0.514102	0.83991	-0.614285	0.514102	0.84043
+pH fractionation/SP	High	O94900		Thymocyte selection-associated high mobility group box protein TOX OS=Homo sapiens OX=9606 GN=TOX PE=1 SV=3	ENSG00000198846	TOX	0.002	-4.10457	-3.07381	0.646273	2.05321	0.448221	0.68163	0.00452717	0.997533	0.998373		-4.80836	N.D.	1.24692	N.D.	NA	1.95511	0.0576063	0.451249
+pH fractionation/SP	High	O94901-9		Isoform 9 of SUN domain-containing protein 1 OS=Homo sapiens OX=9606 GN=SUN1		SUN1	0	2.42114	2.8073	0.355326	0.559257	0.36987	0.622189	0.386155	0.36987	0.61661	2.42941	2.34332	0.184506	0.157719	0.572235	0.866821	-0.0860885	0.572235	0.868037
+pH fractionation/SP	High	O94903		Pyridoxal phosphate homeostasis protein OS=Homo sapiens OX=9606 GN=PLPBP PE=1 SV=1	ENSG00000147471	PROSC; PLPBP	0	2.52305	2.15111	0.192946	0.327533	0.165381	0.420559	-0.37194	0.165381	0.424279	2.13893	1.72425	1.07239	1.08231	0.661909	0.898001	-0.414683	0.661909	0.903773
+pH fractionation/SP	High	O94905		Erlin-2 OS=Homo sapiens OX=9606 GN=ERLIN2 PE=1 SV=1	ENSG00000147475	ERLIN2	0	1.86264	1.89954	0.428275	0.446827	0.92273	0.964823	0.036897	0.92273	0.965118	0.142064	0.678279	0.306312	0.882091	0.376211	0.774072	0.536215	0.376211	0.777776
+pH fractionation/SP	High	O94906		Pre-mRNA-processing factor 6 OS=Homo sapiens OX=9606 GN=PRPF6 PE=1 SV=1	ENSG00000101161	PRPF6	0	3.18851	2.40422	0.307248	0.307529	0.0353594	0.203274	-0.784289	0.0353594	0.211081	5.47236	5.00364	0.310816	0.197865	0.0923022	0.492853	-0.468721	0.0923022	0.498047
+pH fractionation/SP	High	O94913		Pre-mRNA cleavage complex 2 protein Pcf11 OS=Homo sapiens OX=9606 GN=PCF11 PE=1 SV=3	ENSG00000165494	PCF11	0	-0.422545	-0.0991541	0.9149	0.670694	0.647356	0.809574	0.323391	0.647356	0.807697	1.54804	1.26534	0.241355	0.34966	0.313324	0.73293	-0.282694	0.313324	0.734291
+pH fractionation/SP	High	O94915		Protein furry homolog-like OS=Homo sapiens OX=9606 GN=FRYL PE=1 SV=2	ENSG00000075539	FRYL	0	0.32431	0.766292	0.423494	0.325022	0.224874	0.486816	0.441982	0.224874	0.489815	-0.561113	0.393052	0.508261	0.443324	0.0704126	0.462257	0.954165	0.0704126	0.469081
+pH fractionation/SP	High	O94919		Endonuclease domain-containing 1 protein OS=Homo sapiens OX=9606 GN=ENDOD1 PE=1 SV=2	ENSG00000149218	ENDOD1	0	0.522105	-0.674329	0.129456	1.05291	0.122473	0.36087	-1.19643	0.122473	0.366489	-2.18541	-2.8113	0.674445	0.74459	0.341277	0.746855	-0.625894	0.341277	0.749401
+pH fractionation/SP	High	O94925		Glutaminase kidney isoform, mitochondrial OS=Homo sapiens OX=9606 GN=GLS PE=1 SV=1	ENSG00000115419	GLS	0	2.51152	2.92693	0.373419	0.226886	0.174964	0.434788	0.415412	0.174964	0.439168	0.231216	1.1473	0.476744	0.485663	0.0801221	0.473801	0.916081	0.0801221	0.482333
+pH fractionation/SP	High	O94925-3		Isoform 3 of Glutaminase kidney isoform, mitochondrial OS=Homo sapiens OX=9606 GN=GLS	ENSG00000115419	GLS	0	-0.981779	-0.226467	0.602371	1.17417	0.377636	0.628387	0.755311	0.377636	0.622236	-3.79103	-2.54229	0.407507	0.656323	0.0488272	0.418725	1.24874	0.0488272	0.428325
+pH fractionation/SP	High	O94966-5		Isoform 5 of Ubiquitin carboxyl-terminal hydrolase 19 OS=Homo sapiens OX=9606 GN=USP19	ENSG00000172046	USP19	0	-0.640669	-0.5158	1.02162	0.830763	0.877499	0.942076	0.124869	0.877499	0.940164	0.129198	-0.538754	0.56563	0.579751	0.226381	0.667758	-0.667952	0.226381	0.667399
+pH fractionation/SP	High	O94973-2		Isoform 2 of AP-2 complex subunit alpha-2 OS=Homo sapiens OX=9606 GN=AP2A2	ENSG00000183020	AP2A2	0	0.392283	1.17794	0.232755	0.733762	0.151839	0.404511	0.785656	0.151839	0.409406	-0.882084	-0.132487	2.29473	2.0793	0.696555	0.911794	0.749597	0.696555	0.918012
+pH fractionation/SP	High	O94979-8		Isoform 8 of Protein transport protein Sec31A OS=Homo sapiens OX=9606 GN=SEC31A		SEC31A	0	3.4415	2.88396	0.063692	0.502086	0.129036	0.371505	-0.557537	0.129036	0.377055	1.20972	1.46813	0.229215	0.179693	0.199165	0.64376	0.258413	0.199165	0.642695
+pH fractionation/SP	High	O94986		Centrosomal protein of 152 kDa OS=Homo sapiens OX=9606 GN=CEP152 PE=1 SV=4	ENSG00000103995	CEP152	0	-6.37927	-4.20979	2.01228	1.61485	0.219003	0.482148	2.16948	0.219003	0.485273	-1.00171	-2.93601	0.952686	1.63275	0.151033	0.579772	-1.9343	0.151033	0.57977
+pH fractionation/SP	High	O94992		Protein HEXIM1 OS=Homo sapiens OX=9606 GN=HEXIM1 PE=1 SV=1	ENSG00000186834	HEXIM1	0	-0.646688	-0.991865	0.39711	0.309624	0.3008	0.561284	-0.345177	0.3008	0.559258	-2.49128	-2.06059	0.641821	0.297104	0.351035	0.754655	0.430687	0.351035	0.756237
+pH fractionation/SP	High	O95059		Ribonuclease P protein subunit p14 OS=Homo sapiens OX=9606 GN=RPP14 PE=1 SV=3	ENSG00000163684	RPP14	0.005	-2.30902	-2.05512	1.11909	0.81377	0.76652	0.880682	0.2539	0.76652	0.877908	-1.09298	-2.09595	0.709705	1.45013	0.342496	0.747761	-1.00297	0.342496	0.749997
+pH fractionation/SP	High	O95071		E3 ubiquitin-protein ligase UBR5 OS=Homo sapiens OX=9606 GN=UBR5 PE=1 SV=2	ENSG00000104517	UBR5	0	0.957073	0.62497	0.152093	0.485074	0.321074	0.582515	-0.332104	0.321074	0.578555	0.257134	0.348807	1.65125	1.04295	0.939109	0.984423	0.0916721	0.939109	0.983694
+pH fractionation/SP	High	O95104		Splicing factor, arginine/serine-rich 15 OS=Homo sapiens OX=9606 GN=SCAF4 PE=1 SV=3	ENSG00000156304	SCAF4	0	0.206333	-0.00375607	0.198815	0.639313	0.615653	0.793468	-0.210089	0.615653	0.791072	2.49608	2.47617	0.117299	0.239081	0.903227	0.973397	-0.019908	0.903227	0.972777
+pH fractionation/SP	High	O95125		Zinc finger protein 202 OS=Homo sapiens OX=9606 GN=ZNF202 PE=1 SV=4	ENSG00000166261	ZNF202	0.002			N.D.	N.D.	N.D.	NA	0.177353	0.32963	0.585945	-4.39365	-3.85956	0.682047	0.319066	0.392063	0.781427	-0.302959	0.761956	0.935369
+pH fractionation/SP	High	O95140		Mitofusin-2 OS=Homo sapiens OX=9606 GN=MFN2 PE=1 SV=3	ENSG00000116688	MFN2	0.002	-2.73322	-3.16986	0.434475	1.12143	0.563568	0.76026	-0.436647	0.563568	0.756875	-5.08621	-4.16528	0.986244	0.79227	0.275881	0.707735	0.920929	0.275881	0.70357
+pH fractionation/SP	High	O95149		Snurportin-1 OS=Homo sapiens OX=9606 GN=SNUPN PE=1 SV=1	ENSG00000169371	SNUPN	0.001	-0.0396378	-0.471604	0.500165	0.708223	0.436844	0.673569	-0.431967	0.436844	0.669244	-5.85193	-2.26902	N.D.	0.926393	N.D.	NA	4.15684	0.00261308	0.150738
+pH fractionation/SP	High	O95155-4		Isoform 4 of Ubiquitin conjugation factor E4 B OS=Homo sapiens OX=9606 GN=UBE4B		UBE4B	0	-0.216618	-0.156958	0.180676	0.420545	0.832453	0.916556	0.05966	0.832453	0.915752	-2.31387	-1.9117	0.37675	0.4939	0.3249	0.741061	0.402172	0.3249	0.743334
+pH fractionation/SP	High	O95163		Elongator complex protein 1 OS=Homo sapiens OX=9606 GN=ELP1 PE=1 SV=3	ENSG00000070061	IKBKAP; ELP1	0	2.02363	2.07005	0.0684569	0.203078	0.72656	0.854588	0.0464233	0.72656	0.853512	0.161958	0.858869	0.452913	0.6922	0.218268	0.663513	0.696911	0.218268	0.664008
+pH fractionation/SP	High	O95166		Gamma-aminobutyric acid receptor-associated protein OS=Homo sapiens OX=9606 GN=GABARAP PE=1 SV=1	ENSG00000170296	GABARAP	0.002	-3.81138	-4.35212	N.D.	0.834288	N.D.	NA	1.14102	0.304302	0.561982	-3.29596	-3.98128	0.90938	1.62918	0.655215	0.893525	-0.23969	0.894455	0.970211
+pH fractionation/SP	High	O95197-3		Isoform 3 of Reticulon-3 OS=Homo sapiens OX=9606 GN=RTN3	ENSG00000133318	RTN3	0	2.86319	2.44263	0.141724	0.238687	0.058545	0.249439	-0.420564	0.058545	0.259901	-0.432287	-0.0080175	1.52325	1.04081	0.710738	0.914799	0.42427	0.710738	0.920582
+pH fractionation/SP	High	O95202		Mitochondrial proton/calcium exchanger protein OS=Homo sapiens OX=9606 GN=LETM1 PE=1 SV=1	ENSG00000168924	LETM1	0	3.19771	2.22869	0.403237	0.113987	0.0160591	0.147226	-0.969012	0.0160591	0.151273	1.18945	1.15979	0.513904	0.443798	0.943334	0.984423	-0.029655	0.943334	0.984518
+pH fractionation/SP	High	O95214-2		Isoform 2 of Leptin receptor overlapping transcript-like 1 OS=Homo sapiens OX=9606 GN=LEPROTL1	ENSG00000104660	LEPROTL1	0.004	-2.05034	-2.28614	0.471538	0.722932	0.680088	0.828272	-1.51398	0.321633	0.578555	-4.47822	-2.67229	1.44001	0.100477	0.191448	0.636061	0.51882	0.752027	0.931263
+pH fractionation/SP	High	O95218-2		Isoform 2 of Zinc finger Ran-binding domain-containing protein 2 OS=Homo sapiens OX=9606 GN=ZRANB2	ENSG00000132485	ZRANB2	0	3.22654	1.83768	0.553234	1.16257	0.135078	0.380473	-1.38886	0.135078	0.385471	1.41708	1.2202	0.678125	1.31479	0.829009	0.95145	-0.196877	0.829009	0.955087
+pH fractionation/SP	High	O95219		Sorting nexin-4 OS=Homo sapiens OX=9606 GN=SNX4 PE=1 SV=1	ENSG00000114520	SNX4	0.003	-4.14085	-3.26671	0.25034	0.855801	0.164737	0.4202	0.874145	0.164737	0.424069	-3.82697		N.D.	N.D.	N.D.	NA	-0.656173	0.553444	0.859171
+pH fractionation/SP	High	O95232		Luc7-like protein 3 OS=Homo sapiens OX=9606 GN=LUC7L3 PE=1 SV=2	ENSG00000108848	LUC7L3	0	2.51549	1.85685	0.420117	0.0802775	0.0559692	0.243208	-0.658645	0.0559692	0.253968	2.8574	2.61602	0.464732	0.487509	0.568394	0.865528	-0.24138	0.568394	0.866043
+pH fractionation/SP	High	O95235		Kinesin-like protein KIF20A OS=Homo sapiens OX=9606 GN=KIF20A PE=1 SV=1	ENSG00000112984	KIF20A	0	-0.624903	-1.19149	0.601722	0.920625	0.422669	0.664056	-0.566587	0.422669	0.659256	3.14937	0.810052	0.148406	0.366813	0.000512727	0.0821778	-2.33931	0.000512727	0.079597
+pH fractionation/SP	High	O95239		Chromosome-associated kinesin KIF4A OS=Homo sapiens OX=9606 GN=KIF4A PE=1 SV=3	ENSG00000090889	KIF4A	0	1.60283	0.685928	0.388005	0.532664	0.0735623	0.278598	-0.916903	0.0735623	0.289892	1.93739	0.676626	0.275749	0.322945	0.00678037	0.207359	-1.26076	0.00678037	0.211827
+pH fractionation/SP	High	O95243		Methyl-CpG-binding domain protein 4 OS=Homo sapiens OX=9606 GN=MBD4 PE=1 SV=1	ENSG00000129071	MBD4	0	-4.27483	-4.45836	0.729257	1.33002	0.844242	0.924194	-0.183532	0.844242	0.923555	0.488584	-0.00508497	0.555124	0.431385	0.290754	0.711322	-0.493669	0.290754	0.710361
+pH fractionation/SP	High	O95243-2		Isoform 2 of Methyl-CpG-binding domain protein 4 OS=Homo sapiens OX=9606 GN=MBD4	ENSG00000129071	MBD4	0	-4.53249	-5.89582	N.D.	N.D.	N.D.	NA	-0.379279	0.549881	0.746829	-3.34956	-3.12546	1.44831	0.135054	0.849164	0.957988	-0.856574	0.56504	0.864606
+pH fractionation/SP	High	O95248-4		Isoform 4 of Myotubularin-related protein 5 OS=Homo sapiens OX=9606 GN=SBF1		SBF1	0	-1.94208	-2.73373	0.665186	1.43987	0.436074	0.673398	-0.791653	0.436074	0.668844	-2.75269	-2.68439	1.18067	1.49881	0.953538	0.986727	0.0682971	0.953538	0.98634
+pH fractionation/SP	High	O95249		Golgi SNAP receptor complex member 1 OS=Homo sapiens OX=9606 GN=GOSR1 PE=1 SV=1	ENSG00000108587	GOSR1	0.005	-4.26239	-3.14441	1.3969	0.691553	0.281982	0.547203	1.11798	0.281982	0.545643	-5.68108	-4.6761	0.165424	0.311623	0.0564543	0.438885	0.630678	0.407309	0.798257
+pH fractionation/SP	High	O95251		Histone acetyltransferase KAT7 OS=Homo sapiens OX=9606 GN=KAT7 PE=1 SV=1	ENSG00000136504	KAT7	0	-2.07641	-2.07867	0.211513	0.43986	0.993999	0.997332	-0.00225464	0.993999	0.997126	2.72601	2.0386	0.183062	0.40265	0.0545536	0.431233	-0.687411	0.0545536	0.439431
+pH fractionation/SP	High	O95260-2		Isoform ATE1-2 of Arginyl-tRNA--protein transferase 1 OS=Homo sapiens OX=9606 GN=ATE1	ENSG00000107669	ATE1	0.001	-2.77479	-4.80676	1.16682	2.82157	0.313241	0.574375	-2.03197	0.313241	0.570471	-7.23905	-4.6449	1.96529	N.D.	N.D.	NA	1.35818	0.352628	0.756555
+pH fractionation/SP	High	O95267		RAS guanyl-releasing protein 1 OS=Homo sapiens OX=9606 GN=RASGRP1 PE=1 SV=2	ENSG00000172575	RASGRP1	0.002	-3.30867	-4.64181	1.68076	1.00278	0.303452	0.56359	-1.33315	0.303452	0.561318	-2.56702	-3.06226	0.778365	1.96315	0.704399	0.911914	-1.6578	0.325893	0.743982
+pH fractionation/SP	High	O95273		Cyclin-D1-binding protein 1 OS=Homo sapiens OX=9606 GN=CCNDBP1 PE=1 SV=2	ENSG00000166946	CCNDBP1	0.005	-3.02047	-3.17138	0.225991	N.D.	N.D.	NA	-2.08291	0.0996103	0.33482			N.D.	N.D.	N.D.	NA	0.299253	0.061152	0.460902
+pH fractionation/SP	High	O95292		Vesicle-associated membrane protein-associated protein B/C OS=Homo sapiens OX=9606 GN=VAPB PE=1 SV=3	ENSG00000124164	VAPB	0	-0.119099	0.224068	0.35403	0.533601	0.405846	0.650165	0.343167	0.405846	0.644897	-1.05115	-1.2579	0.161035	0.11624	0.145707	0.573187	-0.206755	0.145707	0.573977
+pH fractionation/SP	High	O95297		Myelin protein zero-like protein 1 OS=Homo sapiens OX=9606 GN=MPZL1 PE=1 SV=1	ENSG00000197965	MPZL1	0.002	-1.39552	-1.55598	0.0628651	0.38527	0.515809	0.730185	-0.160461	0.515809	0.72576	-5.90512	-3.82157	N.D.	1.10775	N.D.	NA	2.62203	0.0194973	0.295506
+pH fractionation/SP	High	O95299		NADH dehydrogenase [ubiquinone] 1 alpha subcomplex subunit 10, mitochondrial OS=Homo sapiens OX=9606 GN=NDUFA10 PE=1 SV=1	ENSG00000281434	NDUFA10	0	0.299369	0.980923	0.44044	0.515841	0.156768	0.408141	0.681554	0.156768	0.413342	-2.10562	-1.89151	1.7481	1.20381	0.869783	0.964853	0.214113	0.869783	0.964679
+pH fractionation/SP	High	O95319-2		Isoform 2 of CUGBP Elav-like family member 2 OS=Homo sapiens OX=9606 GN=CELF2	ENSG00000048740	CELF2	0	1.38019	3.0769	0.383395	0.250453	0.00303057	0.0811887	1.69671	0.00303057	0.0811629	3.03533	4.38019	0.179974	0.348429	0.00402869	0.177943	1.34486	0.00402869	0.182573
+pH fractionation/SP	High	O95336		6-phosphogluconolactonase OS=Homo sapiens OX=9606 GN=PGLS PE=1 SV=2	ENSG00000130313	PGLS	0	0.922188	1.41785	0.228528	0.280714	0.0766733	0.285402	0.495666	0.0766733	0.296203	-2.07397	-2.02476	1.0426	0.481522	0.944407	0.984761	0.0492041	0.944407	0.984518
+pH fractionation/SP	High	O95347		Structural maintenance of chromosomes protein 2 OS=Homo sapiens OX=9606 GN=SMC2 PE=1 SV=2	ENSG00000136824	SMC2	0	4.8198	3.47683	0.171068	0.530493	0.0139954	0.139918	-1.34297	0.0139954	0.142059	3.28843	3.31748	0.112942	0.0751006	0.729544	0.921746	0.0290414	0.729544	0.926698
+pH fractionation/SP	High	O95352		Ubiquitin-like modifier-activating enzyme ATG7 OS=Homo sapiens OX=9606 GN=ATG7 PE=1 SV=1	ENSG00000197548	ATG7	0	-0.350569	-0.582767	0.152926	0.316264	0.316122	0.577234	-0.232198	0.316122	0.573677	-4.14419	-2.43143	3.74093	0.424866	0.4748	0.826542	1.71276	0.4748	0.829887
+pH fractionation/SP	High	O95363		Phenylalanine--tRNA ligase, mitochondrial OS=Homo sapiens OX=9606 GN=FARS2 PE=1 SV=1	ENSG00000145982	FARS2	0.001	-1.69153	-2.41556	0.376922	0.965182	0.292792	0.554264	-0.724039	0.292792	0.553747	-4.2902	-3.52797	1.931	0.98786	0.575613	0.868088	0.762229	0.575613	0.869872
+pH fractionation/SP	High	O95365		Zinc finger and BTB domain-containing protein 7A OS=Homo sapiens OX=9606 GN=ZBTB7A PE=1 SV=1	ENSG00000178951	ZBTB7A	0.001	-5.93499	-5.6203	0.895594	0.838983	0.720571	0.852552	0.171919	0.800429	0.89709	-2.31657	-3.26559	0.453402	0.779218	0.142333	0.567379	-0.949016	0.142333	0.568777
+pH fractionation/SP	High	O95372		Acyl-protein thioesterase 2 OS=Homo sapiens OX=9606 GN=LYPLA2 PE=1 SV=1	ENSG00000011009	LYPLA2	0	-0.821374	0.867795	0.28652	0.600675	0.0117257	0.129847	1.68917	0.0117257	0.130023	-1.01139	-1.3879	1.39556	0.0992074	0.665387	0.89983	-0.376506	0.665387	0.905278
+pH fractionation/SP	High	O95373		Importin-7 OS=Homo sapiens OX=9606 GN=IPO7 PE=1 SV=1	ENSG00000205339	IPO7	0	2.91871	2.17192	0.18859	0.0988876	0.00371123	0.0861648	-0.746788	0.00371123	0.086421	0.938947	1.04877	0.326773	0.0561815	0.596894	0.875679	0.109821	0.596894	0.877904
+pH fractionation/SP	High	O95376		E3 ubiquitin-protein ligase ARIH2 OS=Homo sapiens OX=9606 GN=ARIH2 PE=1 SV=1	ENSG00000177479	ARIH2	0.001	-1.81527	-2.18633	0.321251	0.751937	0.475824	0.703201	-0.371057	0.475824	0.698867	-5.27765	-3.41143	1.25488	1.29424	0.147424	0.574369	1.86622	0.147424	0.574992
+pH fractionation/SP	High	O95379-4		Isoform 4 of Tumor necrosis factor alpha-induced protein 8 OS=Homo sapiens OX=9606 GN=TNFAIP8	ENSG00000145779	TNFAIP8	0.001	-1.54772	-1.84852	0.299756	0.708992	0.53563	0.742712	-0.300799	0.53563	0.738835	-3.45343	-2.71861	1.38741	1.53287	0.571467	0.866821	0.734813	0.571467	0.868037
+pH fractionation/SP	High	O95391		Pre-mRNA-splicing factor SLU7 OS=Homo sapiens OX=9606 GN=SLU7 PE=1 SV=2	ENSG00000164609	SLU7	0	-1.50556	-1.33017	0.49863	0.95212	0.791472	0.894384	0.175389	0.791472	0.892452	1.21097	1.01932	0.405767	0.16056	0.489207	0.833723	-0.191654	0.489207	0.834524
+pH fractionation/SP	High	O95394-4		Isoform 3 of Phosphoacetylglucosamine mutase OS=Homo sapiens OX=9606 GN=PGM3	ENSG00000013375	PGM3	0.001	-2.75072	-2.84967	1.2009	0.693732	0.907611	0.959438	-0.0989494	0.907611	0.95784	-4.04404	-3.11706	1.60762	0.405032	0.501689	0.83679	-0.145587	0.923702	0.979932
+pH fractionation/SP	High	O95400		CD2 antigen cytoplasmic tail-binding protein 2 OS=Homo sapiens OX=9606 GN=CD2BP2 PE=1 SV=1	ENSG00000169217	CD2BP2	0	1.03188	0.850865	0.442662	0.139172	0.536291	0.742781	-0.181018	0.536291	0.73897	1.35569	0.715597	0.405418	0.193674	0.0691299	0.460647	-0.64009	0.0691299	0.467905
+pH fractionation/SP	High	O95433		Activator of 90 kDa heat shock protein ATPase homolog 1 OS=Homo sapiens OX=9606 GN=AHSA1 PE=1 SV=1	ENSG00000100591	AHSA1	0	5.28055	4.30963	0.317327	0.176451	0.00979521	0.119786	-0.970919	0.00979521	0.118631	2.50517	2.57111	0.134721	0.428196	0.811704	0.945125	0.0659411	0.811704	0.948236
+pH fractionation/SP	High	O95453		Poly(A)-specific ribonuclease PARN OS=Homo sapiens OX=9606 GN=PARN PE=1 SV=1	ENSG00000140694	PARN	0	0.750274	0.879529	0.129225	0.167107	0.348987	0.606156	0.129255	0.348987	0.601771	3.23737	2.86999	0.130153	0.291525	0.117029	0.532783	-0.367386	0.117029	0.539175
+pH fractionation/SP	High	O95456		Proteasome assembly chaperone 1 OS=Homo sapiens OX=9606 GN=PSMG1 PE=1 SV=1	ENSG00000183527	PSMG1	0	2.04055	1.29299	0.066693	0.297371	0.0131724	0.137758	-0.747557	0.0131724	0.139322	-1.51502	-1.25634	0.351635	0.575533	0.542834	0.855728	0.258676	0.542834	0.855944
+pH fractionation/SP	High	O95466-2		Isoform 2 of Formin-like protein 1 OS=Homo sapiens OX=9606 GN=FMNL1		FMNL1	0	2.27858	3.48315	0.208978	0.236037	0.00270302	0.0773256	1.20457	0.00270302	0.0791084	1.60372	1.66287	0.545568	0.113886	0.863097	0.963032	0.0591484	0.863097	0.963383
+pH fractionation/SP	High	O95470		Sphingosine-1-phosphate lyase 1 OS=Homo sapiens OX=9606 GN=SGPL1 PE=1 SV=3	ENSG00000166224	SGPL1	0	1.32826	1.25683	0.62976	1.03775	0.923725	0.964882	-0.0714297	0.923725	0.965369	-0.715074	0.623521	0.580282	0.352858	0.0269312	0.332207	1.33859	0.0269312	0.344242
+pH fractionation/SP	High	O95475		Homeobox protein SIX6 OS=Homo sapiens OX=9606 GN=SIX6 PE=1 SV=2	ENSG00000184302	SIX6	0	-3.97665	-2.91338	0.546786	1.03037	0.189519	0.44825	1.06328	0.189519	0.452012	0.797874	-0.937303	0.843797	1.17063	0.1057	0.517145	-1.73518	0.1057	0.522182
+pH fractionation/SP	High	O95478		Ribosome biogenesis protein NSA2 homolog OS=Homo sapiens OX=9606 GN=NSA2 PE=1 SV=1	ENSG00000164346	NSA2	0	0.258989	-0.261057	1.15612	0.932561	0.576969	0.768972	-0.520046	0.576969	0.766152	3.62088	2.67547	0.403807	0.274884	0.0285114	0.336347	-0.945408	0.0285114	0.348601
+pH fractionation/SP	High	O95479		GDH/6PGL endoplasmic bifunctional protein OS=Homo sapiens OX=9606 GN=H6PD PE=1 SV=2	ENSG00000049239	H6PD	0.002	-6.25459	-1.97101	1.21948	0.977383	0.0089879	0.114892	4.28359	0.0089879	0.113701	-3.47956	-4.37661	0.438523	2.49213	0.572403	0.866821	-0.897049	0.572403	0.868037
+pH fractionation/SP	High	O95486		Protein transport protein Sec24A OS=Homo sapiens OX=9606 GN=SEC24A PE=1 SV=2	ENSG00000113615	SEC24A	0	0.753287	0.320459	0.0537775	0.887757	0.446727	0.680297	-0.432828	0.446727	0.676059	-1.83648	-1.91843	0.547418	0.58765	0.868304	0.964563	-0.0819485	0.868304	0.964679
+pH fractionation/SP	High	O95487-3		Isoform 3 of Protein transport protein Sec24B OS=Homo sapiens OX=9606 GN=SEC24B	ENSG00000138802	SEC24B	0	0.0324175	-0.322996	0.635577	0.501372	0.48935	0.712024	-0.355414	0.48935	0.707375	-2.31584	-1.60357	0.983677	0.849858	0.396345	0.783777	0.712273	0.396345	0.79071
+pH fractionation/SP	High	O95503		Chromobox protein homolog 6 OS=Homo sapiens OX=9606 GN=CBX6 PE=1 SV=1	ENSG00000183741	CBX6	0.001	-6.32477	-6.01297	N.D.	1.09907	N.D.	NA	0.195381	0.694657	0.832646	-3.91781	-1.70987	0.091289	0.201266	0.000786667	0.100551	3.08974	0.0255643	0.334241
+pH fractionation/SP	High	O95544-2		Isoform 2 of NAD kinase OS=Homo sapiens OX=9606 GN=NADK	ENSG00000008130	NADK	0.005	-4.19461	-4.71255	0.373322	0.600546	0.306684	0.567549	-0.912574	0.149363	0.405553		-5.32585	N.D.	N.D.	N.D.	NA	0.625035	0.210429	0.654071
+pH fractionation/SP	High	O95551		Tyrosyl-DNA phosphodiesterase 2 OS=Homo sapiens OX=9606 GN=TDP2 PE=1 SV=1	ENSG00000111802	TDP2	0	0.161753	-0.86171	0.217096	0.664242	0.0642059	0.258005	-1.02346	0.0642059	0.269612	-2.71171	-2.58963	0.879963	0.679402	0.858419	0.960407	0.122076	0.858419	0.961092
+pH fractionation/SP	High	O95562		Vesicle transport protein SFT2B OS=Homo sapiens OX=9606 GN=SFT2D2 PE=1 SV=1	ENSG00000213064	SFT2D2	0.006	-0.414258	-3.51908	0.377114	1.28141	0.0239558	0.172095	-3.95196	0.0178777	0.156827	-2.25554		N.D.	N.D.	N.D.	NA	-1.19022	0.48115	0.833616
+pH fractionation/SP	High	O95563		Mitochondrial pyruvate carrier 2 OS=Homo sapiens OX=9606 GN=MPC2 PE=1 SV=1	ENSG00000143158	MPC2	0	-0.410753	-0.144798	0.0726848	0.275421	0.181153	0.44082	0.265955	0.181153	0.445105	-2.46793	-2.63533	1.21983	2.71422	0.927065	0.98107	-0.167404	0.927065	0.980013
+pH fractionation/SP	High	O95571		Persulfide dioxygenase ETHE1, mitochondrial OS=Homo sapiens OX=9606 GN=ETHE1 PE=1 SV=2	ENSG00000105755	ETHE1	0	0.195575	2.3182	0.170958	0.147322	8.3088e-05	0.0234895	2.12263	8.3088e-05	0.0219357	-0.0724315	0.132857	0.613653	0.427912	0.659372	0.896129	0.205289	0.659372	0.901993
+pH fractionation/SP	High	O95573		Long-chain-fatty-acid--CoA ligase 3 OS=Homo sapiens OX=9606 GN=ACSL3 PE=1 SV=3	ENSG00000123983	ACSL3	0	1.21669	1.06831	0.17047	0.612531	0.706736	0.844499	-0.14838	0.706736	0.841415	-0.86939	0.256452	0.364261	0.371121	0.0199485	0.285456	1.12584	0.0199485	0.295532
+pH fractionation/SP	High	O95602		DNA-directed RNA polymerase I subunit RPA1 OS=Homo sapiens OX=9606 GN=POLR1A PE=1 SV=2	ENSG00000068654	POLR1A	0	0.373814	0.408654	0.415009	0.348607	0.916712	0.962788	0.03484	0.916712	0.962951	4.22281	3.54364	0.297376	0.283243	0.0457246	0.409568	-0.679176	0.0457246	0.421383
+pH fractionation/SP	High	O95613		Pericentrin OS=Homo sapiens OX=9606 GN=PCNT PE=1 SV=4	ENSG00000160299	PCNT	0	-6.24864	-4.39438	2.23103	1.23741	0.276534	0.538939	1.85426	0.276534	0.537846	-1.18081	-1.73821	0.67176	1.21129	0.524172	0.845075	-0.5574	0.524172	0.845775
+pH fractionation/SP	High	O95619		YEATS domain-containing protein 4 OS=Homo sapiens OX=9606 GN=YEATS4 PE=1 SV=1	ENSG00000127337	YEATS4	0	-1.73314	-2.45338	0.126152	0.0258681	0.000635482	0.0424184	-0.720242	0.000635482	0.0417381	1.15435	0.635851	0.517503	0.804857	0.401101	0.788294	-0.518501	0.401101	0.795216
+pH fractionation/SP	High	O95625		Zinc finger and BTB domain-containing protein 11 OS=Homo sapiens OX=9606 GN=ZBTB11 PE=1 SV=2	ENSG00000066422	ZBTB11	0.001	-4.65276	-5.3422	1.0525	1.3684	0.527172	0.73844	-0.689434	0.527172	0.734331	-4.20225	-3.66699	1.88143	1.15422	0.69605	0.911794	0.535259	0.69605	0.918012
+pH fractionation/SP	High	O95628-6		Isoform 6 of CCR4-NOT transcription complex subunit 4 OS=Homo sapiens OX=9606 GN=CNOT4		CNOT4	0.005	-3.01477	-3.4532	0.32612	0.511444	0.278804	0.542051	-0.438433	0.278804	0.54083	-5.22105	-5.74263	N.D.	N.D.	N.D.	NA	0.121617	0.848513	0.959749
+pH fractionation/SP	High	O95630		STAM-binding protein OS=Homo sapiens OX=9606 GN=STAMBP PE=1 SV=1	ENSG00000124356	STAMBP	0	0.720843	1.11772	0.284769	0.149535	0.0994004	0.326728	0.396878	0.0994004	0.33482	-0.547167	0.157221	1.0651	0.377038	0.34099	0.746855	0.704388	0.34099	0.749401
+pH fractionation/SP	High	O95639		Cleavage and polyadenylation specificity factor subunit 4 OS=Homo sapiens OX=9606 GN=CPSF4 PE=1 SV=1	ENSG00000160917	CPSF4	0	-1.26589	-1.59577	0.295082	0.861061	0.564235	0.760308	-0.329883	0.564235	0.756979	1.19893	1.58251	0.40799	0.187039	0.212908	0.658658	0.383575	0.212908	0.658256
+pH fractionation/SP	High	O95671		N-acetylserotonin O-methyltransferase-like protein OS=Homo sapiens OX=9606 GN=ASMTL PE=1 SV=3	ENSG00000169093	ASMTL	0	0.22095	-0.601722	0.563945	0.503861	0.132638	0.377079	-0.822672	0.132638	0.382542	-1.32351	-1.0594	1.02592	0.680674	0.729073	0.921746	0.264106	0.729073	0.926698
+pH fractionation/SP	High	O95674		Phosphatidate cytidylyltransferase 2 OS=Homo sapiens OX=9606 GN=CDS2 PE=1 SV=1	ENSG00000101290	CDS2	0	-0.155718	0.173175	0.383363	0.305645	0.309889	0.570841	0.328892	0.309889	0.567594	-3.69153	-3.39727	3.66154	1.46712	0.902857	0.973397	1.34573	0.540658	0.85461
+pH fractionation/SP	High	O95684		FGFR1 oncogene partner OS=Homo sapiens OX=9606 GN=FGFR1OP PE=1 SV=1	ENSG00000213066	FGFR1OP	0	-2.74917	-2.98809	0.321216	1.45972	0.795598	0.896727	-0.23892	0.795598	0.894808	-2.16566	-3.62555	1.12983	0.403365	0.191384	0.636061	-2.39528	0.106159	0.523437
+pH fractionation/SP	High	O95696-2		Isoform 2 of Bromodomain-containing protein 1 OS=Homo sapiens OX=9606 GN=BRD1	ENSG00000100425	BRD1; LOC90834	0	-1.81397	-1.1675	0.35757	0.091802	0.0386622	0.210201	0.646473	0.0386622	0.21864	2.24256	1.97544	0.273589	0.464	0.438808	0.810068	-0.267118	0.438808	0.815188
+pH fractionation/SP	High	O95707		Ribonuclease P protein subunit p29 OS=Homo sapiens OX=9606 GN=POP4 PE=1 SV=2	ENSG00000105171	POP4	0	-1.9638	-2.82661	0.569681	0.792609	0.200514	0.461528	-0.862813	0.200514	0.464391	-0.456144	-0.423309	0.490383	1.00101	0.961756	0.989739	0.0328342	0.961756	0.988937
+pH fractionation/SP	High	O95714		E3 ubiquitin-protein ligase HERC2 OS=Homo sapiens OX=9606 GN=HERC2 PE=1 SV=2	ENSG00000128731	HERC2	0.002	-2.35302	-2.39722	0.798514	1.08237	0.957339	0.981311	-0.0442022	0.957339	0.981085	-0.642424	-0.781118	2.65987	3.4616	0.958755	0.98845	-0.138694	0.958755	0.988012
+pH fractionation/SP	High	O95747		Serine/threonine-protein kinase OSR1 OS=Homo sapiens OX=9606 GN=OXSR1 PE=1 SV=1	ENSG00000172939	OXSR1	0	3.55755	3.64238	0.178344	0.112984	0.524809	0.736203	0.0848234	0.524809	0.732388	2.18579	2.38011	0.408848	0.16413	0.487456	0.832745	0.194326	0.487456	0.833905
+pH fractionation/SP	High	O95757		Heat shock 70 kDa protein 4L OS=Homo sapiens OX=9606 GN=HSPA4L PE=1 SV=3	ENSG00000164070	HSPA4L	0	4.81871	4.08361	0.335085	0.242212	0.0369514	0.207312	-0.735097	0.0369514	0.214872	4.69407	3.5337	0.436921	0.567258	0.0484678	0.418472	-1.16037	0.0484678	0.428325
+pH fractionation/SP	High	O95758-4		Isoform 4 of Polypyrimidine tract-binding protein 3 OS=Homo sapiens OX=9606 GN=PTBP3	ENSG00000119314	PTBP3	0	-1.19787	-0.938961	0.382188	0.560889	0.544906	0.748041	0.258909	0.544906	0.74384	2.04429	2.71632	0.132948	0.10958	0.002503	0.151527	0.672029	0.002503	0.150738
+pH fractionation/SP	High	O95772		STARD3 N-terminal-like protein OS=Homo sapiens OX=9606 GN=STARD3NL PE=1 SV=1	ENSG00000010270	STARD3NL	0.004	-3.81832	-2.68666	1.23272	0.611987	0.227497	0.489931	1.13166	0.227497	0.492877		-4.99971	N.D.	0.234182	N.D.	NA	1.27042	0.0679349	0.467767
+pH fractionation/SP	High	O95777		U6 snRNA-associated Sm-like protein LSm8 OS=Homo sapiens OX=9606 GN=LSM8 PE=1 SV=3	ENSG00000128534	NAA38; LSM8	0	0.957574	0.760002	0.417263	0.292286	0.538568	0.743953	-0.197571	0.538568	0.739899	1.93003	1.06157	0.120835	0.631211	0.0793308	0.47338	-0.868454	0.0793308	0.481621
+pH fractionation/SP	High	O95782		AP-2 complex subunit alpha-1 OS=Homo sapiens OX=9606 GN=AP2A1 PE=1 SV=3	ENSG00000196961	AP2A1	0	3.37809	3.67314	0.236352	0.0403715	0.100057	0.327147	0.295051	0.100057	0.335269	2.66673	2.03149	0.442953	0.631081	0.226742	0.667758	-0.635232	0.226742	0.667399
+pH fractionation/SP	High	O95785-3		Isoform 3 of Protein Wiz OS=Homo sapiens OX=9606 GN=WIZ	ENSG00000011451	WIZ	0	-5.93282	-2.43309	2.93313	N.D.	N.D.	NA	1.25102	0.508928	0.72081	-0.569156	-1.9272	1.11583	0.923792	0.179749	0.622732	-1.35804	0.179749	0.621358
+pH fractionation/SP	High	O95786		Probable ATP-dependent RNA helicase DDX58 OS=Homo sapiens OX=9606 GN=DDX58 PE=1 SV=2	ENSG00000107201	DDX58	0	-1.50064	-0.597223	0.27082	0.487374	0.0484922	0.225827	0.90342	0.0484922	0.235474	-0.832659	-1.94561	0.977433	2.06433	0.446198	0.814263	-1.11295	0.446198	0.818429
+pH fractionation/SP	High	O95793		Double-stranded RNA-binding protein Staufen homolog 1 OS=Homo sapiens OX=9606 GN=STAU1 PE=1 SV=2	ENSG00000124214	STAU1	0	1.97044	2.17881	0.100596	0.503582	0.520946	0.733568	0.208362	0.520946	0.729182	3.74039	3.32613	0.4458	0.925937	0.523513	0.844305	-0.414258	0.523513	0.845243
+pH fractionation/SP	High	O95793-3		Isoform 3 of Double-stranded RNA-binding protein Staufen homolog 1 OS=Homo sapiens OX=9606 GN=STAU1	ENSG00000124214	STAU1	0	-5.34512	-5.1814	N.D.	1.40595	N.D.	NA	0.608757	0.512907	0.723859	-3.99412	-4.1755	1.13282	1.17908	0.873654	0.966143	-0.966294	0.440453	0.815188
+pH fractionation/SP	High	O95801		Tetratricopeptide repeat protein 4 OS=Homo sapiens OX=9606 GN=TTC4 PE=1 SV=3	ENSG00000243725	TTC4	0	-0.361866	-0.727819	0.451222	0.533895	0.415822	0.658682	-0.365952	0.415822	0.653453	-2.76633	-2.75738	0.291484	0.458544	0.978616	0.99425	0.00894588	0.978616	0.994594
+pH fractionation/SP	High	O95816		BAG family molecular chaperone regulator 2 OS=Homo sapiens OX=9606 GN=BAG2 PE=1 SV=1	ENSG00000112208	BAG2	0	2.94134	1.78127	0.332297	0.678611	0.0564371	0.244578	-1.16007	0.0564371	0.255413	3.28544	2.73203	0.42574	0.590205	0.258174	0.695716	-0.55341	0.258174	0.691754
+pH fractionation/SP	High	O95819-3		Isoform 3 of Mitogen-activated protein kinase kinase kinase kinase 4 OS=Homo sapiens OX=9606 GN=MAP4K4		MAP4K4	0	3.28468	3.3061	0.258629	0.215031	0.91749	0.962956	0.0214174	0.91749	0.963028	2.41519	2.86266	0.238418	0.0895572	0.0382842	0.385162	0.447469	0.0382842	0.395423
+pH fractionation/SP	High	O95819-6		Isoform 6 of Mitogen-activated protein kinase kinase kinase kinase 4 OS=Homo sapiens OX=9606 GN=MAP4K4	ENSG00000071054	MAP4K4	0	-2.78605	-1.84538	0.574866	1.06824	0.250391	0.51164	0.940668	0.250391	0.513511	-3.82806	-2.98523	N.D.	0.500862	N.D.	NA	2.85206	0.0527948	0.435253
+pH fractionation/SP	High	O95822		Malonyl-CoA decarboxylase, mitochondrial OS=Homo sapiens OX=9606 GN=MLYCD PE=1 SV=3	ENSG00000103150	MLYCD	0.008	-5.46184	-4.4426	0.551963	N.D.	N.D.	NA	-0.117984	0.865203	0.93393		-5.72571	N.D.	N.D.	N.D.	NA	0.382347	0.264919	0.696109
+pH fractionation/SP	High	O95825		Quinone oxidoreductase-like protein 1 OS=Homo sapiens OX=9606 GN=CRYZL1 PE=1 SV=2	ENSG00000205758	CRYZL1	0	-1.4904	-2.28233	0.384676	0.84469	0.213521	0.475519	-0.79193	0.213521	0.479352	-1.35124	-3.74443	0.739564	0.390296	0.0268057	0.332207	-3.25799	0.0290285	0.349888
+pH fractionation/SP	High	O95831		Apoptosis-inducing factor 1, mitochondrial OS=Homo sapiens OX=9606 GN=AIFM1 PE=1 SV=1	ENSG00000156709	AIFM1	0	4.03547	3.76256	0.259921	0.332635	0.325518	0.586465	-0.272907	0.325518	0.581959	2.85675	2.78797	0.365465	0.608067	0.874792	0.966143	-0.0687811	0.874792	0.966269
+pH fractionation/SP	High	O95834-3		Isoform 3 of Echinoderm microtubule-associated protein-like 2 OS=Homo sapiens OX=9606 GN=EML2	ENSG00000125746	EML2	0	-3.53924	-1.84984	1.61025	0.190517	0.145457	0.394397	1.68941	0.145457	0.399672	-3.84043	-3.3121	0.97482	0.940254	0.590376	0.871503	-0.545492	0.690052	0.915365
+pH fractionation/SP	High	O95861		3'(2'),5'-bisphosphate nucleotidase 1 OS=Homo sapiens OX=9606 GN=BPNT1 PE=1 SV=1	ENSG00000162813	BPNT1	0	2.94023	3.64477	0.132409	0.164001	0.00442389	0.0916289	0.704543	0.00442389	0.0902047	1.05855	0.982614	0.99514	0.955245	0.928626	0.98107	-0.0759334	0.928626	0.980213
+pH fractionation/SP	High	O95864		Fatty acid desaturase 2 OS=Homo sapiens OX=9606 GN=FADS2 PE=1 SV=1	ENSG00000134824	FADS2	0	2.74705	2.05154	0.328872	0.300624	0.0538906	0.23805	-0.695511	0.0538906	0.248498	0.891992	1.27409	0.405294	0.675055	0.447915	0.815528	0.382102	0.447915	0.818954
+pH fractionation/SP	High	O95865		N(G),N(G)-dimethylarginine dimethylaminohydrolase 2 OS=Homo sapiens OX=9606 GN=DDAH2 PE=1 SV=1	ENSG00000233076	DDAH2	0	-0.714887	1.3046	0.358348	0.258125	0.0013753	0.0599429	2.01949	0.0013753	0.0596012	-0.105221	-1.57054	0.222639	0.175057	0.000857928	0.102086	-1.46532	0.000857928	0.101893
+pH fractionation/SP	High	O95870		Protein ABHD16A OS=Homo sapiens OX=9606 GN=ABHD16A PE=1 SV=3	ENSG00000204427	ABHD16A	0	-0.609351	0.43725	0.0924111	0.200311	0.00119537	0.0584969	1.0466	0.00119537	0.0580176	-1.59708	-1.9522	0.534965	0.499154	0.447853	0.815528	-0.355121	0.447853	0.818954
+pH fractionation/SP	High	O95881		Thioredoxin domain-containing protein 12 OS=Homo sapiens OX=9606 GN=TXNDC12 PE=1 SV=1	ENSG00000117862	TXNDC12	0	0.272754	1.27443	0.0510156	0.764039	0.0861331	0.302813	1.00168	0.0861331	0.312065	-1.70544	-2.855	1.12448	1.19949	0.292544	0.713027	-1.14956	0.292544	0.712311
+pH fractionation/SP	High	O95926		Pre-mRNA-splicing factor SYF2 OS=Homo sapiens OX=9606 GN=SYF2 PE=1 SV=1	ENSG00000117614	SYF2	0	-1.59407	-2.10008	1.66043	2.74751	0.798364	0.897949	-0.506002	0.798364	0.895755	1.26461	0.867956	0.184348	0.0850759	0.0276875	0.33299	-0.396655	0.0276875	0.34491
+pH fractionation/SP	High	O95983		Methyl-CpG-binding domain protein 3 OS=Homo sapiens OX=9606 GN=MBD3 PE=1 SV=1	ENSG00000071655	MBD3	0	-2.40699	-3.14037	0.154853	1.53437	0.456396	0.687851	-0.733382	0.456396	0.683141	-0.163391	-0.302557	0.117761	0.0620451	0.144393	0.572155	-0.139167	0.144393	0.572986
+pH fractionation/SP	High	O95985		DNA topoisomerase 3-beta-1 OS=Homo sapiens OX=9606 GN=TOP3B PE=1 SV=1	ENSG00000100038	TOP3B	0	-2.73046	-4.83905	0.221117	2.36759	0.199366	0.459546	-2.10859	0.199366	0.462569	-1.97157	-3.53749	1.91167	4.4227	0.603543	0.877278	-1.56592	0.603543	0.879753
+pH fractionation/SP	High	O95989		Diphosphoinositol polyphosphate phosphohydrolase 1 OS=Homo sapiens OX=9606 GN=NUDT3 PE=1 SV=1	ENSG00000272325	NUDT3	0	0.617028	-0.308998	0.173784	0.210639	0.00419714	0.0900454	-0.926026	0.00419714	0.0889328	-3.05288	-2.02038	0.845627	0.894956	0.220027	0.667016	1.0325	0.220027	0.666924
+pH fractionation/SP	High	O95999		B-cell lymphoma/leukemia 10 OS=Homo sapiens OX=9606 GN=BCL10 PE=1 SV=1	ENSG00000142867	BCL10	0.002	-0.46462	-0.719587	0.206015	0.072669	0.240615	0.50095	-0.243957	0.929541	0.967698	-5.46069	-5.71529	2.35366	3.81349	0.943277	0.984423	-0.179059	0.929146	0.980233
+pH fractionation/SP	High	O96000		NADH dehydrogenase [ubiquinone] 1 beta subcomplex subunit 10 OS=Homo sapiens OX=9606 GN=NDUFB10 PE=1 SV=3	ENSG00000140990	NDUFB10	0.001	-4.44663	-4.10211	0.600555	1.40689	0.780286	0.890327	0.204944	0.849223	0.926047	-5.97819	-5.3801	N.D.	N.D.	N.D.	NA	0.410794	0.380711	0.779278
+pH fractionation/SP	High	O96005		Cleft lip and palate transmembrane protein 1 OS=Homo sapiens OX=9606 GN=CLPTM1 PE=1 SV=1	ENSG00000104853	CLPTM1	0	-0.828167	-0.892135	0.27677	0.351664	0.816649	0.907262	-0.0639677	0.816649	0.905005	-4.20401	-2.4743	0.286346	0.292224	0.00730626	0.213059	2.57198	0.0412749	0.408482
+pH fractionation/SP	High	O96007		Molybdopterin synthase catalytic subunit OS=Homo sapiens OX=9606 GN=MOCS2 PE=1 SV=1	ENSG00000164172	MOCS2	0	-0.283126	-0.166863	0.701581	0.781956	0.857328	0.932065	0.116263	0.857328	0.931247	-1.96963	-1.79019	0.729629	0.519974	0.746149	0.923001	0.179443	0.746149	0.92931
+pH fractionation/SP	High	O96008		Mitochondrial import receptor subunit TOM40 homolog OS=Homo sapiens OX=9606 GN=TOMM40 PE=1 SV=1	ENSG00000130204	TOMM40	0	3.61164	2.68052	0.124716	0.143572	0.00105991	0.0562816	-0.931127	0.00105991	0.0557087	0.159344	0.654956	0.628296	0.765171	0.434839	0.809072	0.495612	0.434839	0.815188
+pH fractionation/SP	High	O96011		Peroxisomal membrane protein 11B OS=Homo sapiens OX=9606 GN=PEX11B PE=1 SV=1	ENSG00000131779	LOC101060567; PEX11B	0.001	-2.61637	-3.48349	0.820434	2.37627	0.582394	0.770958	-0.86712	0.582394	0.76808	-5.89791	-5.09793	2.40919	1.72274	0.664255	0.899753	0.799984	0.664255	0.905278
+pH fractionation/SP	High	O96013		Serine/threonine-protein kinase PAK 4 OS=Homo sapiens OX=9606 GN=PAK4 PE=1 SV=1	ENSG00000130669	PAK4	0.002	-2.49452	-3.29325	0.205941	0.55204	0.078687	0.289826	-0.798735	0.078687	0.300425	-5.00697	-3.58958	0.703896	0.317786	0.033574	0.360397	1.4174	0.033574	0.372293
+pH fractionation/SP	High	O96017-9		Isoform 9 of Serine/threonine-protein kinase Chk2 OS=Homo sapiens OX=9606 GN=CHEK2	ENSG00000183765	CHEK2	0	0.203788	-1.34537	0.61504	0.892069	0.0684795	0.267789	-1.54915	0.0684795	0.279761	-2.51552	-1.94195	0.782337	0.360427	0.312993	0.732894	0.573576	0.312993	0.734291
+pH fractionation/SP	High	O96019		Actin-like protein 6A OS=Homo sapiens OX=9606 GN=ACTL6A PE=1 SV=1	ENSG00000136518	ACTL6A	0	2.39912	2.39761	0.387648	0.164293	0.995343	0.997366	-0.00150924	0.995343	0.997576	4.81395	4.76643	0.380203	0.237454	0.863244	0.963032	-0.0475214	0.863244	0.963383
+pH fractionation/SP	High	O96028		Histone-lysine N-methyltransferase NSD2 OS=Homo sapiens OX=9606 GN=NSD2 PE=1 SV=1	ENSG00000109685	WHSC1; NSD2	0	0.191049	-0.142084	0.0259319	0.276666	0.106449	0.337871	-0.333132	0.106449	0.345787	4.7417	2.83147	0.436738	0.234659	0.00262044	0.153857	-1.91024	0.00262044	0.150738
+pH fractionation/SP	High	P00167		Cytochrome b5 OS=Homo sapiens OX=9606 GN=CYB5A PE=1 SV=2	ENSG00000166347	CYB5A	0	0.399226	-0.0851736	0.0976111	0.0890588	0.00315173	0.0816694	-0.484399	0.00315173	0.0815624	-3.08795	-2.73508	0.867475	0.995826	0.667573	0.900412	0.352872	0.667573	0.905278
+pH fractionation/SP	High	P00338-3		Isoform 3 of L-lactate dehydrogenase A chain OS=Homo sapiens OX=9606 GN=LDHA	ENSG00000134333	LDHA	0	8.25401	7.9599	0.389795	0.306637	0.362409	0.61747	-0.294106	0.362409	0.612191	4.93152	4.66963	0.743005	1.02081	0.737549	0.921826	-0.261897	0.737549	0.9285
+pH fractionation/SP	High	P00367		Glutamate dehydrogenase 1, mitochondrial OS=Homo sapiens OX=9606 GN=GLUD1 PE=1 SV=2	ENSG00000148672	GLUD1	0	4.31246	4.14997	0.11272	0.407901	0.542401	0.746664	-0.162491	0.542401	0.742569	1.67645	1.23528	0.825949	0.679824	0.514507	0.839981	-0.441169	0.514507	0.840503
+pH fractionation/SP	High	P00374		Dihydrofolate reductase OS=Homo sapiens OX=9606 GN=DHFR PE=1 SV=2	ENSG00000228716	DHFR; DHFRP1	0	0.913348	-2.03468	0.806677	2.49798	0.123638	0.363082	-2.94803	0.123638	0.368568	-3.2598	-2.1	2.28638	0.702883	0.448278	0.815528	1.15979	0.448278	0.818954
+pH fractionation/SP	High	P00387-3		Isoform 3 of NADH-cytochrome b5 reductase 3 OS=Homo sapiens OX=9606 GN=CYB5R3	ENSG00000100243	CYB5R3	0	3.26009	3.40697	0.0417745	0.338559	0.497248	0.717435	0.146878	0.497248	0.713159	1.34026	2.0337	0.877227	0.562235	0.31322	0.73293	0.693442	0.31322	0.734291
+pH fractionation/SP	High	P00390		Glutathione reductase, mitochondrial OS=Homo sapiens OX=9606 GN=GSR PE=1 SV=2	ENSG00000104687	GSR	0	3.79661	4.03959	0.076909	0.0382674	0.0080493	0.110461	0.242976	0.0080493	0.109918	1.69658	1.86331	0.427074	0.272879	0.599282	0.876317	0.166731	0.599282	0.879045
+pH fractionation/SP	High	P00395		Cytochrome c oxidase subunit 1 OS=Homo sapiens OX=9606 GN=MT-CO1 PE=1 SV=1	ENSG00000198804	COX1	0.004	-1.7959	-1.55138	0.344096	0.328811	0.423818	0.664779	0.244523	0.423818	0.659914	-4.53548	-5.84144	0.0615403	0.774834	0.140684	0.565655	-0.764727	0.39078	0.787556
+pH fractionation/SP	High	P00403		Cytochrome c oxidase subunit 2 OS=Homo sapiens OX=9606 GN=MT-CO2 PE=1 SV=1	ENSG00000198712	COX2	0	2.99701	3.18694	0.0995231	0.0802114	0.0617432	0.253323	0.189928	0.0617432	0.264176	0.510772	1.18222	0.359231	0.37221	0.0878168	0.485872	0.671449	0.0878168	0.49119
+pH fractionation/SP	High	P00414		Cytochrome c oxidase subunit 3 OS=Homo sapiens OX=9606 GN=MT-CO3 PE=1 SV=2	ENSG00000198938	COX3	0.005	-1.03907	-3.32103	0.185948	4.17003	0.397314	0.644919	-2.28195	0.397314	0.639109			N.D.	N.D.	N.D.	NA	0.206417	0.305434	0.723078
+pH fractionation/SP	High	P00441		Superoxide dismutase [Cu-Zn] OS=Homo sapiens OX=9606 GN=SOD1 PE=1 SV=2	ENSG00000142168	SOD1	0	6.13336	5.43616	0.290113	0.807775	0.23218	0.494617	-0.697203	0.23218	0.497265	2.12374	1.97925	0.991849	0.551046	0.836234	0.95265	-0.144487	0.836234	0.956042
+pH fractionation/SP	High	P00488		Coagulation factor XIII A chain OS=Homo sapiens OX=9606 GN=F13A1 PE=1 SV=4		F13A1	0.005	-4.43398	-5.76846	N.D.	N.D.	N.D.	NA	-0.284996	0.67557	0.823244	-3.41552	-2.61831	0.591012	N.D.	N.D.	NA	-0.618673	0.741276	0.92892
+pH fractionation/SP	High	P00491		Purine nucleoside phosphorylase OS=Homo sapiens OX=9606 GN=PNP PE=1 SV=2	ENSG00000198805	PNP	0	4.81765	6.19308	0.380803	0.282493	0.0073623	0.107588	1.37543	0.0073623	0.106888	1.50088	2.52509	0.296627	0.440553	0.0288313	0.338245	1.02421	0.0288313	0.349888
+pH fractionation/SP	High	P00492		Hypoxanthine-guanine phosphoribosyltransferase OS=Homo sapiens OX=9606 GN=HPRT1 PE=1 SV=2	ENSG00000165704	HPRT1	0	3.50868	2.93684	0.087635	0.325024	0.0422925	0.213804	-0.571846	0.0422925	0.222524	1.64812	1.33787	0.744787	1.06143	0.699822	0.911794	-0.310253	0.699822	0.918099
+pH fractionation/SP	High	P00505		Aspartate aminotransferase, mitochondrial OS=Homo sapiens OX=9606 GN=GOT2 PE=1 SV=3	ENSG00000125166	GOT2	0	5.60048	5.11563	0.160528	0.24663	0.046218	0.222918	-0.484854	0.046218	0.232132	4.51088	3.61708	2.46002	2.05902	0.654617	0.893323	-0.8938	0.654617	0.899813
+pH fractionation/SP	High	P00558		Phosphoglycerate kinase 1 OS=Homo sapiens OX=9606 GN=PGK1 PE=1 SV=3	ENSG00000102144	PGK1	0	8.66731	8.9633	0.127183	0.158115	0.0649052	0.259493	0.295994	0.0649052	0.271188	5.94209	6.01034	0.366439	0.204551	0.792156	0.939713	0.0682509	0.792156	0.943162
+pH fractionation/SP	High	P00747		Plasminogen OS=Homo sapiens OX=9606 GN=PLG PE=1 SV=2	ENSG00000122194	PLG	0.001	-3.4399	-3.1557	1.521	0.220928	0.81817	0.907902	0.238934	0.883893	0.944332	-1.95386	-0.0287046	1.72185	0.773733	0.152075	0.580647	1.92515	0.152075	0.580851
+pH fractionation/SP	High	P00813		Adenosine deaminase OS=Homo sapiens OX=9606 GN=ADA PE=1 SV=3	ENSG00000196839	ADA	0	6.53492	5.62437	0.241148	0.444877	0.035643	0.203598	-0.910544	0.035643	0.211263	3.23859	2.82984	0.522462	0.971251	0.555842	0.860655	-0.408757	0.555842	0.860036
+pH fractionation/SP	High	P00846		ATP synthase subunit a OS=Homo sapiens OX=9606 GN=MT-ATP6 PE=1 SV=1	ENSG00000198899	ATP6	0.001	0.527974	0.854335	0.298551	0.488273	0.379216	0.629973	0.32636	0.379216	0.623667	-3.24333	-1.86529	0.0865086	0.544284	0.0123408	0.249391	1.37804	0.0123408	0.259106
+pH fractionation/SP	High	P00918		Carbonic anhydrase 2 OS=Homo sapiens OX=9606 GN=CA2 PE=1 SV=2	ENSG00000104267	CA2	0.001	-4.88145	-4.12977	2.63745	2.34798	0.767491	0.881139	0.0719738	0.971943	0.987274	-5.34516	-4.32233	0.972496	0.908533	0.314806	0.734228	1.52154	0.139092	0.562849
+pH fractionation/SP	High	P00966		Argininosuccinate synthase OS=Homo sapiens OX=9606 GN=ASS1 PE=1 SV=2	ENSG00000130707	ASS1	0.003	-2.68423	-2.48558	0.91445	0.859431	0.797519	0.897526	0.198657	0.797519	0.895319	-3.43455	-3.80846	0.486385	0.438107	0.378499	0.77544	-0.37391	0.378499	0.779174
+pH fractionation/SP	High	P01024		Complement C3 OS=Homo sapiens OX=9606 GN=C3 PE=1 SV=2	ENSG00000125730	C3	0.002	-4.95754	-3.55349	1.52609	0.979364	0.342823	0.601975	0.625502	0.64097	0.804299	-3.23475	-2.27294	0.966085	2.06894	0.506074	0.836796	0.961813	0.506074	0.838764
+pH fractionation/SP	High	P01106-2		Isoform 2 of Myc proto-oncogene protein OS=Homo sapiens OX=9606 GN=MYC	ENSG00000136997	MYC	0.008		-3.09988	N.D.	0.235081	N.D.	NA	3.11991	4.46966e-05	0.0200072	-2.04244	-5.22771	0.891277	0.267099	0.0183196	0.285456	-3.64945	0.00650662	0.208334
+pH fractionation/SP	High	P01111		GTPase NRas OS=Homo sapiens OX=9606 GN=NRAS PE=1 SV=1	ENSG00000213281	NRAS	0	0.785049	1.23038	0.105448	0.206265	0.0291143	0.186068	0.445333	0.0291143	0.192455	-0.61613	-0.263138	0.853834	0.730219	0.615224	0.880408	0.352992	0.615224	0.884094
+pH fractionation/SP	High	P01112		GTPase HRas OS=Homo sapiens OX=9606 GN=HRAS PE=1 SV=1	ENSG00000276536	HRAS	0	-4.10144	-3.88895	0.194336	0.30105	0.395555	0.643982	-0.491756	0.534075	0.737293	-3.92825	-3.52841	0.326743	0.315902	0.202236	0.647825	0.399837	0.202236	0.64592
+pH fractionation/SP	High	P01116-2		Isoform 2B of GTPase KRas OS=Homo sapiens OX=9606 GN=KRAS	ENSG00000133703	KRAS	0	-1.11567	-0.657643	0.337859	0.413379	0.211481	0.473615	0.458027	0.211481	0.476856	-2.17704	-1.94267	0.57691	0.370576	0.585672	0.8706	0.234371	0.585672	0.872462
+pH fractionation/SP	High	P01130		Low-density lipoprotein receptor OS=Homo sapiens OX=9606 GN=LDLR PE=1 SV=1	ENSG00000130164	LDLR	0	-0.854511	-3.58209	0.313695	1.42675	0.0318548	0.195773	-2.72758	0.0318548	0.201971	-4.04261	-3.30931	0.0145986	0.377337	0.0799387	0.473801	1.5847	0.145703	0.573977
+pH fractionation/SP	High	P01733		T-cell receptor beta chain V region YT35 OS=Homo sapiens OX=9606 GN=TRBV12-3 PE=1 SV=1		TRBV12-3	0	0.427653	0.533346	0.278073	1.05038	0.874381	0.940528	0.105692	0.874381	0.938769	-1.89364	-0.79345	0.0489203	0.24176	0.00151151	0.123255	1.10019	0.00151151	0.122912
+pH fractionation/SP	High	P01848		T-cell receptor alpha chain C region OS=Homo sapiens OX=9606 GN=TRAC PE=1 SV=1		TRAC	0.002	-4.49511	-2.54679	0.65744	1.50218	0.108701	0.342142	1.94831	0.108701	0.349079	-7.09378	-6.63553	0.64648	N.D.	N.D.	NA	0.416971	0.208587	0.653173
+pH fractionation/SP	High	P01850		T-cell receptor beta-1 chain C region OS=Homo sapiens OX=9606 GN=TRBC1 PE=1 SV=3		TRBC1	0	1.73619	0.954326	0.653357	1.73779	0.506156	0.723338	-0.781861	0.506156	0.719689	-1.68938	-1.17098	2.2791	0.816425	0.729529	0.921746	0.518396	0.729529	0.926698
+pH fractionation/SP	High	P01889		HLA class I histocompatibility antigen, B-7 alpha chain OS=Homo sapiens OX=9606 GN=HLA-B PE=1 SV=3	ENSG00000234745	HLA-B	0	2.15873	3.46565	0.295557	0.529487	0.0202441	0.159815	1.30692	0.0202441	0.165466	-0.597029	1.82281	0.835151	2.83191	0.228744	0.667758	2.41984	0.228744	0.667399
+pH fractionation/SP	High	P02042		Hemoglobin subunit delta OS=Homo sapiens OX=9606 GN=HBD PE=1 SV=2	ENSG00000223609	HBD	0.002	-0.58481	-1.01708	0.5471	1.64984	0.68885	0.83265	-0.432268	0.68885	0.829958	-0.389508	0.758261	1.28329	1.31542	0.340208	0.746855	1.14777	0.340208	0.749359
+pH fractionation/SP	High	P02533		Keratin, type I cytoskeletal 14 OS=Homo sapiens OX=9606 GN=KRT14 PE=1 SV=4	ENSG00000186847	KRT14	0	3.76806	2.82237	0.459686	1.21573	0.276088	0.538939	-0.945694	0.276088	0.537846	3.27322	4.21475	0.873837	0.659875	0.210652	0.655829	0.941521	0.210652	0.654071
+pH fractionation/SP	High	P02538		Keratin, type II cytoskeletal 6A OS=Homo sapiens OX=9606 GN=KRT6A PE=1 SV=3	ENSG00000205420	KRT6A	0	3.45708	2.98112	0.29303	0.992899	0.470431	0.69895	-0.47596	0.470431	0.694438	3.47938	4.23006	0.931004	0.513336	0.288457	0.709704	0.750685	0.288457	0.708168
+pH fractionation/SP	High	P02545		Prelamin-A/C OS=Homo sapiens OX=9606 GN=LMNA PE=1 SV=1	ENSG00000160789	LMNA	0	-0.951664	-0.419021	0.687892	0.832532	0.441103	0.675568	0.532643	0.441103	0.671958	0.21124	0.542844	1.23079	1.09191	0.74463	0.92292	0.331604	0.74463	0.929062
+pH fractionation/SP	High	P02675		Fibrinogen beta chain OS=Homo sapiens OX=9606 GN=FGB PE=1 SV=2	ENSG00000171564	FGB	0.002	-4.83663	-3.68973	2.32905	0.990125	0.481824	0.709176	1.67908	0.244111	0.507952	-0.324195	-0.496206	1.10585	0.555283	0.821574	0.949133	-0.172011	0.821574	0.952425
+pH fractionation/SP	High	P02751		Fibronectin OS=Homo sapiens OX=9606 GN=FN1 PE=1 SV=4	ENSG00000115414	FN1	0	-1.44089	-0.245755	0.277563	0.846708	0.0808561	0.29342	1.19513	0.0808561	0.303462	2.65316	3.15007	2.13158	0.779937	0.723818	0.920719	0.496912	0.723818	0.925873
+pH fractionation/SP	High	P02765		Alpha-2-HS-glycoprotein OS=Homo sapiens OX=9606 GN=AHSG PE=1 SV=1		AHSG	0.002	1.5312	1.02157	1.75019	1.67185	0.733802	0.860369	-0.509628	0.733802	0.858672	-0.835667	-0.000606632	1.79113	2.09674	0.627655	0.884082	0.835061	0.627655	0.889522
+pH fractionation/SP	High	P02768		Serum albumin OS=Homo sapiens OX=9606 GN=ALB PE=1 SV=2	ENSG00000163631	ALB	0	4.49664	5.41145	0.590843	0.194984	0.0635293	0.256143	0.914812	0.0635293	0.267649	4.2469	4.63906	0.512767	0.182767	0.280177	0.709002	0.392159	0.280177	0.70676
+pH fractionation/SP	High	P02771		Alpha-fetoprotein OS=Homo sapiens OX=9606 GN=AFP PE=1 SV=1	ENSG00000081051	AFP	0.002	-2.08228	-1.04136	0.73465	0.463208	0.106511	0.337871	1.04092	0.106511	0.345787	-1.42894	-0.614302	1.42814	0.463214	0.400534	0.787514	0.814634	0.400534	0.794708
+pH fractionation/SP	High	P02786		Transferrin receptor protein 1 OS=Homo sapiens OX=9606 GN=TFRC PE=1 SV=2	ENSG00000072274	TFRC	0	5.24876	3.89616	0.0947651	0.128052	0.000124414	0.028386	-1.3526	0.000124414	0.0262191	2.1758	1.51598	0.294874	0.0268201	0.0181503	0.284886	-0.659826	0.0181503	0.29386
+pH fractionation/SP	High	P02788		Lactotransferrin OS=Homo sapiens OX=9606 GN=LTF PE=1 SV=6	ENSG00000012223	LTF	0.002	-0.99737	-0.646387	0.468333	0.558379	0.451109	0.683409	0.350983	0.451109	0.67905	-4.89704	-3.7931	1.89084	0.866699	0.409976	0.792666	1.10394	0.409976	0.800422
+pH fractionation/SP	High	P03891		NADH-ubiquinone oxidoreductase chain 2 OS=Homo sapiens OX=9606 GN=MT-ND2 PE=1 SV=2	ENSG00000198763	ND2	0.007	-2.27966	-2.14163	0.54337	1.84318	0.906989	0.959418	0.138029	0.906989	0.95784		-5.7663	N.D.	1.34979	N.D.	NA	1.03996	0.257866	0.691754
+pH fractionation/SP	High	P03897		NADH-ubiquinone oxidoreductase chain 3 OS=Homo sapiens OX=9606 GN=MT-ND3 PE=1 SV=1	ENSG00000198840	ND3	0.005	-3.09693	-2.94489	0.645573	0.378096	0.742602	0.865408	0.152043	0.742602	0.863055			N.D.	N.D.	N.D.	NA	0.2885	0.10054	0.513398
+pH fractionation/SP	High	P03915		NADH-ubiquinone oxidoreductase chain 5 OS=Homo sapiens OX=9606 GN=MT-ND5 PE=1 SV=2	ENSG00000198786	ND5	0.005	-3.38954	-2.96951	0.439484	1.26984	0.616966	0.794304	0.420035	0.616966	0.791961	-5.923		0.0733842	N.D.	N.D.	NA	-0.330492	0.303153	0.722807
+pH fractionation/SP	High	P04004		Vitronectin OS=Homo sapiens OX=9606 GN=VTN PE=1 SV=1	ENSG00000109072	VTN	0.005	-5.2704	-6.55561	1.37848	N.D.	N.D.	NA	-0.915405	0.326168	0.582408	-3.07024	-0.828751	0.5625	1.49783	0.0871159	0.485872	0.386407	0.854789	0.960471
+pH fractionation/SP	High	P04040		Catalase OS=Homo sapiens OX=9606 GN=CAT PE=1 SV=3	ENSG00000121691	CAT	0	3.21807	3.24544	0.0563407	0.297555	0.883174	0.945963	0.0273742	0.883174	0.944178	1.50409	2.0623	0.743888	0.301227	0.294725	0.71591	0.558205	0.294725	0.715242
+pH fractionation/SP	High	P04049-2		Isoform 2 of RAF proto-oncogene serine/threonine-protein kinase OS=Homo sapiens OX=9606 GN=RAF1	ENSG00000132155	RAF1	0	-2.09579	-1.58231	0.762609	0.416686	0.363963	0.618727	0.513482	0.363963	0.613551	-4.17554	-3.1386	1.79924	1.39654	0.474478	0.826542	1.03694	0.474478	0.829887
+pH fractionation/SP	High	P04053		DNA nucleotidylexotransferase OS=Homo sapiens OX=9606 GN=DNTT PE=1 SV=3	ENSG00000107447	DNTT	0	-2.34008	-2.94556	1.46293	1.27986	0.66899	0.822714	-1.61196	0.317913	0.575095	-3.35654	-3.75388	0.413817	0.0127552	0.288127	0.709704	-1.35455	0.241703	0.678128
+pH fractionation/SP	High	P04062		Glucosylceramidase OS=Homo sapiens OX=9606 GN=GBA PE=1 SV=3	ENSG00000177628	GBA	0.007	-4.56192	-4.8963	0.742642	N.D.	N.D.	NA	-1.0994	0.131652	0.381654			N.D.	N.D.	N.D.	NA	0.212171	0.128484	0.551937
+pH fractionation/SP	High	P04066		Tissue alpha-L-fucosidase OS=Homo sapiens OX=9606 GN=FUCA1 PE=1 SV=4	ENSG00000179163	FUCA1	0.004	-3.23481	-4.65333	0.448001	1.78937	0.253696	0.515982	-1.41852	0.253696	0.517391	-3.10345	-3.02731	0.284803	N.D.	N.D.	NA	-1.00804	0.574189	0.868488
+pH fractionation/SP	High	P04075-2		Isoform 2 of Fructose-bisphosphate aldolase A OS=Homo sapiens OX=9606 GN=ALDOA	ENSG00000149925	ALDOA	0	8.47097	8.42029	0.370878	0.0870698	0.829074	0.914543	-0.0506794	0.829074	0.913635	4.79388	4.98808	0.649802	0.667299	0.736272	0.921826	0.194195	0.736272	0.928386
+pH fractionation/SP	High	P04080		Cystatin-B OS=Homo sapiens OX=9606 GN=CSTB PE=1 SV=2	ENSG00000160213	CSTB	0	2.0221	2.9353	0.17125	0.514059	0.0432786	0.215841	0.913201	0.0432786	0.224717	-0.671599	-0.495208	0.59114	0.462793	0.704879	0.912103	0.176391	0.704879	0.918853
+pH fractionation/SP	High	P04083		Annexin A1 OS=Homo sapiens OX=9606 GN=ANXA1 PE=1 SV=2	ENSG00000135046	ANXA1	0	2.0039	3.86757	1.26254	0.480635	0.0752139	0.282405	1.86367	0.0752139	0.29369	0.360301	1.68759	1.12402	0.62164	0.147987	0.574369	1.32729	0.147987	0.574992
+pH fractionation/SP	High	P04179		Superoxide dismutase [Mn], mitochondrial OS=Homo sapiens OX=9606 GN=SOD2 PE=1 SV=3		SOD2	0	1.49714	1.31674	0.536849	0.256186	0.62717	0.799318	-0.180392	0.62717	0.797309	-1.07132	-1.15024	1.06041	0.330535	0.907999	0.975231	-0.0789121	0.907999	0.974641
+pH fractionation/SP	High	P04181		Ornithine aminotransferase, mitochondrial OS=Homo sapiens OX=9606 GN=OAT PE=1 SV=1	ENSG00000065154	OAT	0	0.882646	-0.257139	0.0567555	0.494503	0.0165915	0.147226	-1.13979	0.0165915	0.151372	-2.03658	-1.33587	0.887444	0.31923	0.26756	0.701816	0.700715	0.26756	0.696499
+pH fractionation/SP	High	P04183		Thymidine kinase, cytosolic OS=Homo sapiens OX=9606 GN=TK1 PE=1 SV=2	ENSG00000167900	TK1	0.006	-3.93545	-3.98437	0.162837	0.519535	0.909626	0.960817	0.586424	0.452729	0.68002	-4.75492		N.D.	N.D.	N.D.	NA	-0.357243	0.64373	0.897369
+pH fractionation/SP	High	P04216		Thy-1 membrane glycoprotein OS=Homo sapiens OX=9606 GN=THY1 PE=1 SV=2	ENSG00000154096	THY1	0	-1.99478	-1.03516	0.774352	0.393848	0.128271	0.370363	0.959619	0.128271	0.376046	0.484975	1.05114	0.59842	0.676079	0.338504	0.746527	0.566164	0.338504	0.74892
+pH fractionation/SP	High	P04234		T-cell surface glycoprotein CD3 delta chain OS=Homo sapiens OX=9606 GN=CD3D PE=1 SV=1	ENSG00000167286	CD3D	0	2.02521	2.37115	0.346769	0.363166	0.298701	0.55989	0.345936	0.298701	0.559097	-0.160798	0.306035	0.885132	0.180298	0.421314	0.80184	0.466833	0.421314	0.808949
+pH fractionation/SP	High	P04259		Keratin, type II cytoskeletal 6B OS=Homo sapiens OX=9606 GN=KRT6B PE=1 SV=5	ENSG00000185479	KRT6B	0	-0.981768	-1.09011	0.610406	0.584037	0.835098	0.917787	-0.10834	0.835098	0.917087	-0.861403	0.232401	0.901867	1.12875	0.259972	0.697577	1.0938	0.259972	0.692657
+pH fractionation/SP	High	P04264		Keratin, type II cytoskeletal 1 OS=Homo sapiens OX=9606 GN=KRT1 PE=1 SV=6	ENSG00000167768	KRT1	0	8.26443	7.842	0.693277	0.643897	0.482509	0.709176	-0.422426	0.482509	0.70391	8.03364	9.15221	0.758368	0.428023	0.0901278	0.487136	1.11857	0.0901278	0.493352
+pH fractionation/SP	High	P04350		Tubulin beta-4A chain OS=Homo sapiens OX=9606 GN=TUBB4A PE=1 SV=2	ENSG00000104833	TUBB4A	0	1.27414	1.24278	0.671132	0.204638	0.942025	0.974467	-0.0313524	0.942025	0.974161	-0.322703	0.190806	0.463956	0.593976	0.303355	0.721804	0.513508	0.303355	0.722807
+pH fractionation/SP	High	P04406		Glyceraldehyde-3-phosphate dehydrogenase OS=Homo sapiens OX=9606 GN=GAPDH PE=1 SV=3	ENSG00000111640	GAPDH	0	9.67559	9.60234	0.138518	0.16761	0.590881	0.776319	-0.0732507	0.590881	0.773202	6.76826	7.04974	0.123522	0.426549	0.33391	0.74308	0.281479	0.33391	0.745179
+pH fractionation/SP	High	P04424		Argininosuccinate lyase OS=Homo sapiens OX=9606 GN=ASL PE=1 SV=4	ENSG00000126522	ASL	0	-2.82736	-2.60491	0.90469	1.80968	0.858243	0.932065	0.222448	0.858243	0.931247	-5.05423	-3.79712	1.50965	1.20536	0.322732	0.740611	1.25711	0.322732	0.743334
+pH fractionation/SP	High	P04439		HLA class I histocompatibility antigen, A-3 alpha chain OS=Homo sapiens OX=9606 GN=HLA-A PE=1 SV=2	ENSG00000206503	HLA-A	0	3.69386	5.7992	0.29461	0.374092	0.00156259	0.0614955	2.10535	0.00156259	0.0620755	1.09627	2.52422	0.433588	0.2796	0.00868674	0.226831	1.42795	0.00868674	0.234222
+pH fractionation/SP	High	P04632		Calpain small subunit 1 OS=Homo sapiens OX=9606 GN=CAPNS1 PE=1 SV=1	ENSG00000126247	CAPNS1	0	1.84092	2.25057	0.288913	0.393164	0.21956	0.482785	0.409645	0.21956	0.485668	-0.463609	0.233755	0.336986	0.306157	0.0568065	0.43937	0.697364	0.0568065	0.447765
+pH fractionation/SP	High	P04818		Thymidylate synthase OS=Homo sapiens OX=9606 GN=TYMS PE=1 SV=3	ENSG00000176890	TYMS	0	3.76677	1.40065	0.0235094	1.27804	0.0327094	0.196849	-2.36612	0.0327094	0.203713	1.30662	0.978726	0.557243	0.574155	0.517006	0.841129	-0.327895	0.517006	0.841442
+pH fractionation/SP	High	P04843		Dolichyl-diphosphooligosaccharide--protein glycosyltransferase subunit 1 OS=Homo sapiens OX=9606 GN=RPN1 PE=1 SV=1	ENSG00000163902	RPN1	0	6.08755	6.35793	0.491778	0.661564	0.600327	0.782439	0.270382	0.600327	0.779713	4.50393	4.60246	0.355054	0.895902	0.868052	0.964549	0.0985238	0.868052	0.964649
+pH fractionation/SP	High	P04844		Dolichyl-diphosphooligosaccharide--protein glycosyltransferase subunit 2 OS=Homo sapiens OX=9606 GN=RPN2 PE=1 SV=3	ENSG00000118705	RPN2	0	3.94425	4.29968	0.225757	0.0365497	0.0545517	0.239211	0.355429	0.0545517	0.249748	2.79826	3.12297	0.264455	0.321562	0.248093	0.687922	0.324716	0.248093	0.685916
+pH fractionation/SP	High	P04899-4		Isoform sGi2 of Guanine nucleotide-binding protein G(i) subunit alpha-2 OS=Homo sapiens OX=9606 GN=GNAI2		GNAI2	0	3.67505	4.46109	0.18593	0.214294	0.00865568	0.112897	0.786048	0.00865568	0.111575	5.1533	5.18317	0.321469	0.34112	0.91741	0.978321	0.0298762	0.91741	0.977626
+pH fractionation/SP	High	P04908		Histone H2A type 1-B/E OS=Homo sapiens OX=9606 GN=HIST1H2AB PE=1 SV=2	ENSG00000277075	HIST1H2AB; HIST1H2AE	0	-5.34768	-4.16154	1.91864	1.32933	0.428469	0.66774	1.18615	0.428469	0.662984	2.67654	3.00554	1.04388	1.22471	0.741133	0.922606	0.329002	0.741133	0.92892
+pH fractionation/SP	High	P05023		Sodium/potassium-transporting ATPase subunit alpha-1 OS=Homo sapiens OX=9606 GN=ATP1A1 PE=1 SV=1	ENSG00000163399	ATP1A1	0	5.11246	4.52617	0.201276	0.212431	0.0255833	0.175883	-0.586283	0.0255833	0.181537	2.48492	2.55336	0.450132	0.31261	0.839351	0.953105	0.0684331	0.839351	0.956532
+pH fractionation/SP	High	P05107		Integrin beta-2 OS=Homo sapiens OX=9606 GN=ITGB2 PE=1 SV=2		ITGB2	0	1.90626	2.76972	0.169077	0.211277	0.00523539	0.0953123	0.863462	0.00523539	0.0942672	0.603779	1.16484	1.15334	0.530832	0.486697	0.831984	0.561062	0.486697	0.833616
+pH fractionation/SP	High	P05109		Protein S100-A8 OS=Homo sapiens OX=9606 GN=S100A8 PE=1 SV=1	ENSG00000143546	S100A8	0.001	-2.38396	-2.86285	0.252212	0.534916	0.233395	0.494803	-0.478889	0.233395	0.497469	-1.94953	-0.450498	0.757069	1.89126	0.271486	0.703384	1.49903	0.271486	0.69926
+pH fractionation/SP	High	P05114		Non-histone chromosomal protein HMG-14 OS=Homo sapiens OX=9606 GN=HMGN1 PE=1 SV=3	ENSG00000205581	HMGN1	0	-3.24952	-3.2145	0.984154	2.22367	0.981292	0.991011	0.0350247	0.981292	0.99021	5.12687	4.70556	1.9107	2.54728	0.829979	0.95145	-0.421308	0.829979	0.955087
+pH fractionation/SP	High	P05141		ADP/ATP translocase 2 OS=Homo sapiens OX=9606 GN=SLC25A5 PE=1 SV=7	ENSG00000005022	SLC25A5	0	3.87159	3.69138	0.248673	0.177991	0.36513	0.619201	-0.180203	0.36513	0.613903	2.06971	1.97926	0.175004	0.119055	0.500263	0.836645	-0.0904561	0.500263	0.837575
+pH fractionation/SP	High	P05161		Ubiquitin-like protein ISG15 OS=Homo sapiens OX=9606 GN=ISG15 PE=1 SV=5	ENSG00000187608	ISG15	0	2.8419	3.51471	0.229974	0.183996	0.0167238	0.147476	0.672804	0.0167238	0.151639	1.12673	2.57005	0.605874	0.68629	0.0524025	0.425695	1.44332	0.0524025	0.435253
+pH fractionation/SP	High	P05165		Propionyl-CoA carboxylase alpha chain, mitochondrial OS=Homo sapiens OX=9606 GN=PCCA PE=1 SV=4	ENSG00000175198	PCCA	0.001	-4.19456	-3.30287	0.225165	1.79278	0.440852	0.675568	0.891692	0.440852	0.671958	-4.524	-3.84997	0.353089	0.998655	0.332246	0.74308	0.674029	0.332246	0.745179
+pH fractionation/SP	High	P05166-2		Isoform 2 of Propionyl-CoA carboxylase beta chain, mitochondrial OS=Homo sapiens OX=9606 GN=PCCB	ENSG00000114054	PCCB	0	-0.966687	-1.5258	0.574283	0.85722	0.401099	0.647228	-0.559109	0.401099	0.641284	-4.39511	-4.78337	1.62454	1.22488	0.812551	0.945314	-0.162923	0.903585	0.972777
+pH fractionation/SP	High	P05198		Eukaryotic translation initiation factor 2 subunit 1 OS=Homo sapiens OX=9606 GN=EIF2S1 PE=1 SV=3	ENSG00000134001	EIF2S1	0	4.60372	4.40907	0.338997	0.388557	0.548905	0.749807	-0.194652	0.548905	0.74617	4.80828	4.37073	0.284279	0.319941	0.151308	0.579772	-0.437553	0.151308	0.57977
+pH fractionation/SP	High	P05204		Non-histone chromosomal protein HMG-17 OS=Homo sapiens OX=9606 GN=HMGN2 PE=1 SV=3	ENSG00000198830	HMGN2	0	-2.55811	-3.84471	3.06263	2.41009	0.598051	0.78083	-1.2866	0.598051	0.778013	2.71317	2.80958	1.9639	1.70942	0.951938	0.986314	0.0964133	0.951938	0.985279
+pH fractionation/SP	High	P05386		60S acidic ribosomal protein P1 OS=Homo sapiens OX=9606 GN=RPLP1 PE=1 SV=1	ENSG00000137818	RPLP1	0	0.936262	1.12367	0.363671	0.549436	0.64808	0.81012	0.187407	0.64808	0.808207	3.12115	1.57978	0.803376	0.801861	0.0783414	0.47338	-1.54137	0.0783414	0.481621
+pH fractionation/SP	High	P05387		60S acidic ribosomal protein P2 OS=Homo sapiens OX=9606 GN=RPLP2 PE=1 SV=1	ENSG00000177600	RPLP2	0	2.59279	2.59186	0.505677	0.629694	0.998515	0.999139	-0.000923295	0.998515	0.998905	3.92739	3.16409	0.416178	0.52989	0.121254	0.539965	-0.763301	0.121254	0.543271
+pH fractionation/SP	High	P05388		60S acidic ribosomal protein P0 OS=Homo sapiens OX=9606 GN=RPLP0 PE=1 SV=1	ENSG00000089157	RPLP0	0	6.18382	5.98919	0.255115	0.289408	0.431551	0.669079	-0.194631	0.431551	0.664567	7.22657	6.36017	0.417225	0.466059	0.0744384	0.467839	-0.866392	0.0744384	0.475706
+pH fractionation/SP	High	P05455		Lupus La protein OS=Homo sapiens OX=9606 GN=SSB PE=1 SV=2	ENSG00000138385	SSB	0	4.99484	4.54073	0.211753	0.195101	0.052348	0.234032	-0.454119	0.052348	0.244688	4.29747	4.18565	0.432953	0.1635	0.697065	0.911794	-0.111825	0.697065	0.918012
+pH fractionation/SP	High	P05556		Integrin beta-1 OS=Homo sapiens OX=9606 GN=ITGB1 PE=1 SV=2	ENSG00000150093	ITGB1	0	2.56536	2.79832	0.123584	0.121575	0.0804684	0.292978	0.232961	0.0804684	0.303341	-0.715776	-0.426774	0.256358	0.22769	0.21809	0.663513	0.289003	0.21809	0.664008
+pH fractionation/SP	High	P05771-2		Isoform Beta-II of Protein kinase C beta type OS=Homo sapiens OX=9606 GN=PRKCB	ENSG00000166501	PRKCB	0	-3.14203	-4.88561	0.309166	1.97053	0.204577	0.466342	-1.74358	0.204577	0.469077	-6.22761	-4.31609	1.52672	0.853746	0.131332	0.551926	1.91152	0.131332	0.554336
+pH fractionation/SP	High	P05783		Keratin, type I cytoskeletal 18 OS=Homo sapiens OX=9606 GN=KRT18 PE=1 SV=2	ENSG00000111057	KRT18	0.003	-3.5905	-3.85498	1.18551	1.33363	0.810055	0.903858	-0.264481	0.810055	0.90195	-3.54084	-2.78614	1.79658	1.59387	0.615169	0.880408	0.754705	0.615169	0.884094
+pH fractionation/SP	High	P05787-2		Isoform 2 of Keratin, type II cytoskeletal 8 OS=Homo sapiens OX=9606 GN=KRT8	ENSG00000170421	KRT8	0	0.415078	-0.204756	0.956229	1.20557	0.523797	0.735858	-0.619833	0.523797	0.731573	-0.514639	-1.78417	1.80754	2.9779	0.562168	0.862393	-1.26953	0.562168	0.863336
+pH fractionation/SP	High	P06126		T-cell surface glycoprotein CD1a OS=Homo sapiens OX=9606 GN=CD1A PE=1 SV=4	ENSG00000158477	CD1A	0	0.220752	-0.665593	0.8469	1.1715	0.348099	0.605766	-0.886345	0.348099	0.601354	-1.49962	-3.7746	2.04664	1.77897	0.219858	0.667016	-2.27498	0.219858	0.666865
+pH fractionation/SP	High	P06127		T-cell surface glycoprotein CD5 OS=Homo sapiens OX=9606 GN=CD5 PE=1 SV=2	ENSG00000110448	CD5	0	-0.122752	0.701339	0.150249	1.49802	0.396774	0.644919	0.824091	0.396774	0.639109	-2.27594	-1.86645	0.670142	0.946579	0.573892	0.8669	0.409488	0.573892	0.868296
+pH fractionation/SP	High	P06132		Uroporphyrinogen decarboxylase OS=Homo sapiens OX=9606 GN=UROD PE=1 SV=2	ENSG00000126088	UROD	0	0.324168	0.295599	0.291429	0.513951	0.937278	0.972563	-0.0285688	0.937278	0.972273	-1.60393	-2.9957	0.637975	0.961521	0.104942	0.51538	-1.39177	0.104942	0.520254
+pH fractionation/SP	High	P06239-3		Isoform 3 of Tyrosine-protein kinase Lck OS=Homo sapiens OX=9606 GN=LCK	ENSG00000182866	LCK	0	2.97144	3.11023	0.221258	0.332033	0.579337	0.770048	0.138791	0.579337	0.767376	3.5073	3.44729	0.302048	0.269325	0.809982	0.944742	-0.0600059	0.809982	0.948033
+pH fractionation/SP	High	P06241		Tyrosine-protein kinase Fyn OS=Homo sapiens OX=9606 GN=FYN PE=1 SV=3	ENSG00000010810	FYN	0	0.0754477	-4.35892	1.46961	0.246894	0.0276455	0.181832	-5.036	0.00852856	0.111325	-4.08248	-2.30563	0.89006	0.47632	0.0873215	0.485872	0.36993	0.818568	0.951542
+pH fractionation/SP	High	P06280		Alpha-galactosidase A OS=Homo sapiens OX=9606 GN=GLA PE=1 SV=1	ENSG00000102393	GLA	0.001	-2.34282	-3.24505	0.407738	1.17154	0.276241	0.538939	-0.902233	0.276241	0.537846	-4.32734	-5.1655	0.648769	0.486742	0.223233	0.667758	-1.26177	0.103046	0.520254
+pH fractionation/SP	High	P06396		Gelsolin OS=Homo sapiens OX=9606 GN=GSN PE=1 SV=1	ENSG00000148180	GSN	0	-1.52137	-0.0452814	0.382536	0.265224	0.00535462	0.0953123	1.47609	0.00535462	0.0942672	-1.35953	0.555189	0.380734	0.309124	0.00249442	0.151527	1.91472	0.00249442	0.150738
+pH fractionation/SP	High	P06400		Retinoblastoma-associated protein OS=Homo sapiens OX=9606 GN=RB1 PE=1 SV=2	ENSG00000139687	RB1	0	3.79193	2.99804	0.125612	0.177526	0.00320133	0.0816694	-0.793885	0.00320133	0.0815624	3.67898	3.97605	0.381877	0.257053	0.326275	0.742283	0.297067	0.326275	0.743982
+pH fractionation/SP	High	P06454		Prothymosin alpha OS=Homo sapiens OX=9606 GN=PTMA PE=1 SV=2	ENSG00000187514	PTMA	0	4.39335	1.38387	1.29104	3.03443	0.189104	0.448229	-3.00948	0.189104	0.452012	0.340047	-1.39857	1.40639	3.84077	0.502426	0.83679	-1.73861	0.502426	0.83835
+pH fractionation/SP	High	P06493		Cyclin-dependent kinase 1 OS=Homo sapiens OX=9606 GN=CDK1 PE=1 SV=3	ENSG00000170312	CDK1	0	4.76559	3.67854	0.0655799	0.164751	0.000445366	0.0388908	-1.08705	0.000445366	0.0368214	4.00402	3.48303	0.207543	0.372928	0.101989	0.512295	-0.520991	0.101989	0.517133
+pH fractionation/SP	High	P06576		ATP synthase subunit beta, mitochondrial OS=Homo sapiens OX=9606 GN=ATP5F1B PE=1 SV=3	ENSG00000110955	ATP5B	0	7.13824	7.38154	0.1123	0.184794	0.123129	0.362153	0.243299	0.123129	0.367808	4.70691	5.6567	0.26023	0.537724	0.0511745	0.424829	0.949783	0.0511745	0.434854
+pH fractionation/SP	High	P06702		Protein S100-A9 OS=Homo sapiens OX=9606 GN=S100A9 PE=1 SV=1	ENSG00000163220	S100A9	0	-1.82061	-1.8023	0.633147	0.822259	0.977091	0.990178	0.0183049	0.977091	0.98917	-0.303964	-0.713939	1.51727	1.7281	0.7729	0.935287	-0.409976	0.7729	0.940478
+pH fractionation/SP	High	P06730-2		Isoform 2 of Eukaryotic translation initiation factor 4E OS=Homo sapiens OX=9606 GN=EIF4E	ENSG00000151247	EIF4E	0	2.80319	2.29143	0.0368808	0.3272	0.0545462	0.239211	-0.511759	0.0545462	0.249748	1.91136	1.03538	0.166987	0.419167	0.0282353	0.335647	-0.875981	0.0282353	0.347715
+pH fractionation/SP	High	P06733		Alpha-enolase OS=Homo sapiens OX=9606 GN=ENO1 PE=1 SV=2	ENSG00000074800	ENO1	0	9.27702	9.1238	0.299698	0.408323	0.628002	0.799697	-0.153219	0.628002	0.797714	6.24224	6.38068	0.270868	0.459641	0.676388	0.904706	0.138441	0.676388	0.910027
+pH fractionation/SP	High	P06733-2		Isoform MBP-1 of Alpha-enolase OS=Homo sapiens OX=9606 GN=ENO1		ENO1	0	-3.12191	-2.82923	0.828917	2.10803	0.871854	0.938781	0.310916	0.868182	0.93478	-4.93325	-4.53158	1.66003	N.D.	N.D.	NA	-0.314203	0.795391	0.943724
+pH fractionation/SP	High	P06744-2		Isoform 2 of Glucose-6-phosphate isomerase OS=Homo sapiens OX=9606 GN=GPI	ENSG00000105220	GPI	0	6.51698	6.31952	0.0429082	0.396159	0.439117	0.674508	-0.19746	0.439117	0.670965	3.42688	3.31213	0.487014	0.406347	0.769683	0.934993	-0.114743	0.769683	0.939714
+pH fractionation/SP	High	P06746		DNA polymerase beta OS=Homo sapiens OX=9606 GN=POLB PE=1 SV=3	ENSG00000070501	POLB	0	-0.0129349	0.484625	0.344026	0.409918	0.182602	0.443001	0.49756	0.182602	0.447379	0.414805	0.734482	0.692093	0.759832	0.618656	0.881313	0.319677	0.618656	0.885451
+pH fractionation/SP	High	P06748		Nucleophosmin OS=Homo sapiens OX=9606 GN=NPM1 PE=1 SV=2	ENSG00000181163	NPM1	0	6.65322	6.20669	0.402768	0.334235	0.213557	0.475519	-0.446525	0.213557	0.479352	10.3016	9.54857	0.465897	0.571816	0.151743	0.580494	-0.753017	0.151743	0.580566
+pH fractionation/SP	High	P06748-3		Isoform 3 of Nucleophosmin OS=Homo sapiens OX=9606 GN=NPM1	ENSG00000181163	NPM1	0	-2.65203	-3.10285	0.829721	N.D.	N.D.	NA	-2.43003	0.0918225	0.321633	-0.924144	-1.28112	N.D.	0.302114	N.D.	NA	1.81299	0.532154	0.849893
+pH fractionation/SP	High	P06753-2		Isoform 2 of Tropomyosin alpha-3 chain OS=Homo sapiens OX=9606 GN=TPM3	ENSG00000143549	TPM3	0	2.054	3.56726	0.532911	0.412971	0.0177258	0.151046	1.51326	0.0177258	0.155762	3.14802	2.82513	0.374545	0.340713	0.33133	0.74308	-0.322889	0.33133	0.744475
+pH fractionation/SP	High	P06865		Beta-hexosaminidase subunit alpha OS=Homo sapiens OX=9606 GN=HEXA PE=1 SV=2	ENSG00000213614	HEXA	0	1.02501	1.82693	0.166345	0.173257	0.00444226	0.0916289	0.801915	0.00444226	0.0902047	-0.391429	-0.541854	0.57562	0.622295	0.773911	0.936011	-0.150425	0.773911	0.940637
+pH fractionation/SP	High	P06899		Histone H2B type 1-J OS=Homo sapiens OX=9606 GN=HIST1H2BJ PE=1 SV=3	ENSG00000124635	HIST1H2BJ	0	-0.250055	0.117136	0.382582	1.01493	0.589126	0.77486	0.367191	0.589126	0.77189	7.4067	7.15645	0.521528	0.104939	0.460915	0.822708	-0.250258	0.460915	0.826774
+pH fractionation/SP	High	P07099		Epoxide hydrolase 1 OS=Homo sapiens OX=9606 GN=EPHX1 PE=1 SV=1	ENSG00000143819	EPHX1	0	-0.252753	-0.129591	0.36012	0.455124	0.731819	0.859091	0.123162	0.731819	0.85733	-1.98221	-1.97531	1.26036	0.980991	0.994392	0.999121	0.00689503	0.994392	0.999464
+pH fractionation/SP	High	P07108-5		Isoform 5 of Acyl-CoA-binding protein OS=Homo sapiens OX=9606 GN=DBI	ENSG00000155368	DBI	0	-0.0258904	0.313841	0.85704	1.44549	0.74388	0.866267	0.339731	0.74388	0.863757	-1.98438	-2.54697	1.23734	0.211611	0.480949	0.831281	-0.562582	0.480949	0.833616
+pH fractionation/SP	High	P07195		L-lactate dehydrogenase B chain OS=Homo sapiens OX=9606 GN=LDHB PE=1 SV=2	ENSG00000111716	LDHB	0	8.47982	8.56266	0.230241	0.0594176	0.578787	0.770048	0.0828377	0.578787	0.767376	5.08763	5.20643	0.378555	0.558468	0.775602	0.936383	0.118792	0.775602	0.940755
+pH fractionation/SP	High	P07199		Major centromere autoantigen B OS=Homo sapiens OX=9606 GN=CENPB PE=1 SV=2	ENSG00000125817	CENPB	0	-2.94017	-2.24202	1.01101	1.67241	0.569565	0.76419	0.698151	0.569565	0.760459	1.95312	1.30925	0.116895	0.785789	0.233059	0.669566	-0.643865	0.233059	0.668573
+pH fractionation/SP	High	P07203		Glutathione peroxidase 1 OS=Homo sapiens OX=9606 GN=GPX1 PE=1 SV=4	ENSG00000233276	GPX1	0.002	-3.83463	-3.13167	2.07532	0.359936	0.59421	0.778311	0.702955	0.59421	0.77538	-4.90272	-4.19079	0.943223	0.851791	0.386867	0.777525	0.711927	0.386867	0.78472
+pH fractionation/SP	High	P07205		Phosphoglycerate kinase 2 OS=Homo sapiens OX=9606 GN=PGK2 PE=1 SV=3	ENSG00000170950	PGK2	0	-1.68977	-1.78866	0.417223	0.671539	0.83909	0.920366	-0.0988852	0.83909	0.919892	-5.68953	-4.8095	0.9866	1.0833	0.485121	0.831735	0.632872	0.513962	0.84043
+pH fractionation/SP	High	P07237		Protein disulfide-isomerase OS=Homo sapiens OX=9606 GN=P4HB PE=1 SV=3	ENSG00000185624	P4HB	0	6.36839	6.1102	0.151741	0.398278	0.353265	0.60818	-0.258194	0.353265	0.603358	3.94357	4.26298	1.0031	0.607838	0.661732	0.898001	0.31941	0.661732	0.903773
+pH fractionation/SP	High	P07305		Histone H1.0 OS=Homo sapiens OX=9606 GN=H1F0 PE=1 SV=3	ENSG00000189060	H1F0	0	-3.42442	-0.962735	1.24932	2.92876	0.251574	0.513403	2.46169	0.251574	0.515113	2.76935	4.77049	0.425309	0.836638	0.0209627	0.289984	2.00113	0.0209627	0.299977
+pH fractionation/SP	High	P07311		Acylphosphatase-1 OS=Homo sapiens OX=9606 GN=ACYP1 PE=1 SV=2	ENSG00000119640	ACYP1	0	0.746838	0.495667	0.175615	0.179253	0.158011	0.409823	-0.251171	0.158011	0.414862	-2.34837	-3.74125	0.156121	0.605592	0.0181834	0.284886	-1.39289	0.0181834	0.29386
+pH fractionation/SP	High	P07339		Cathepsin D OS=Homo sapiens OX=9606 GN=CTSD PE=1 SV=1	ENSG00000117984	CTSD	0	3.36324	3.90532	0.129128	0.163102	0.0107129	0.124363	0.542077	0.0107129	0.124168	0.88188	1.25081	0.578709	0.519138	0.457282	0.819686	0.368929	0.457282	0.823429
+pH fractionation/SP	High	P07355-2		Isoform 2 of Annexin A2 OS=Homo sapiens OX=9606 GN=ANXA2	ENSG00000182718	ANXA2	0	3.34152	3.42648	0.417186	0.172601	0.760808	0.877266	0.0849608	0.760808	0.874887	2.15041	2.5182	1.44514	0.706082	0.712276	0.914799	0.367792	0.712276	0.920764
+pH fractionation/SP	High	P07384		Calpain-1 catalytic subunit OS=Homo sapiens OX=9606 GN=CAPN1 PE=1 SV=1	ENSG00000014216	CAPN1	0	3.89917	4.38102	0.055416	0.146799	0.00601005	0.0999458	0.48185	0.00601005	0.0990016	2.28075	2.60484	0.191742	0.270163	0.165438	0.603102	0.324087	0.165438	0.603088
+pH fractionation/SP	High	P07437		Tubulin beta chain OS=Homo sapiens OX=9606 GN=TUBB PE=1 SV=2	ENSG00000232575	TUBB	0	6.607	6.94543	0.184341	0.348366	0.211154	0.473615	0.33843	0.211154	0.476785	5.19978	5.92041	0.459876	0.378687	0.104217	0.51538	0.720628	0.104217	0.520254
+pH fractionation/SP	High	P07477		Trypsin-1 OS=Homo sapiens OX=9606 GN=PRSS1 PE=1 SV=1	ENSG00000274247	PRSS1	0.001	2.72844	2.231	0.747853	0.837219	0.485577	0.710124	-0.497446	0.485577	0.705455	3.57502	2.73303	1.11167	2.10851	0.573717	0.8669	-0.841989	0.573717	0.868296
+pH fractionation/SP	High	P07602-3		Isoform Sap-mu-9 of Prosaposin OS=Homo sapiens OX=9606 GN=PSAP		PSAP	0	2.1543	1.8523	0.0985009	0.313623	0.186773	0.446298	-0.301997	0.186773	0.450249	-1.04359	-0.478659	0.291309	0.301055	0.0797486	0.473801	0.564934	0.0797486	0.481783
+pH fractionation/SP	High	P07686		Beta-hexosaminidase subunit beta OS=Homo sapiens OX=9606 GN=HEXB PE=1 SV=3		HEXB	0	1.42843	2.42509	0.43419	0.427282	0.0471633	0.223026	0.996661	0.0471633	0.232548	0.347244	-0.112042	0.933576	0.855512	0.563943	0.863332	-0.459286	0.563943	0.863943
+pH fractionation/SP	High	P07737		Profilin-1 OS=Homo sapiens OX=9606 GN=PFN1 PE=1 SV=2	ENSG00000108518	PFN1	0	8.03828	9.28277	0.257886	0.338757	0.0071659	0.106294	1.24449	0.0071659	0.105189	5.25053	6.36337	0.115371	0.170793	0.000728041	0.0996076	1.11284	0.000728041	0.0960636
+pH fractionation/SP	High	P07741		Adenine phosphoribosyltransferase OS=Homo sapiens OX=9606 GN=APRT PE=1 SV=2	ENSG00000198931	APRT	0	3.00318	2.91736	0.0700824	0.192935	0.509077	0.72508	-0.0858172	0.509077	0.72081	2.0961	2.76482	0.376033	0.418321	0.108554	0.520826	0.668723	0.108554	0.52739
+pH fractionation/SP	High	P07766		T-cell surface glycoprotein CD3 epsilon chain OS=Homo sapiens OX=9606 GN=CD3E PE=1 SV=2	ENSG00000198851	CD3E	0	2.15086	2.04214	0.249005	0.298067	0.653162	0.814638	-0.108713	0.653162	0.812109	0.08413	0.586386	0.540818	0.316498	0.237364	0.67517	0.502256	0.237364	0.67332
+pH fractionation/SP	High	P07814		Bifunctional glutamate/proline--tRNA ligase OS=Homo sapiens OX=9606 GN=EPRS PE=1 SV=5	ENSG00000136628	EPRS	0	6.14731	5.49021	0.0790881	0.269872	0.0155129	0.147226	-0.6571	0.0155129	0.150146	4.2661	4.36332	0.421384	0.102719	0.717619	0.916344	0.097218	0.717619	0.921814
+pH fractionation/SP	High	P07858		Cathepsin B OS=Homo sapiens OX=9606 GN=CTSB PE=1 SV=3	ENSG00000164733	CTSB	0	0.328745	2.02741	0.19123	0.224647	0.000567945	0.0410231	1.69866	0.000567945	0.0401348	-3.41337	-0.781347	1.05913	0.575093	0.0193917	0.285456	2.63202	0.0193917	0.295506
+pH fractionation/SP	High	P07900-2		Isoform 2 of Heat shock protein HSP 90-alpha OS=Homo sapiens OX=9606 GN=HSP90AA1	ENSG00000080824	HSP90AA1	0	8.48018	7.81933	0.247206	0.49653	0.108005	0.341271	-0.660852	0.108005	0.348548	6.09724	6.14263	0.331172	0.139095	0.837459	0.953105	0.0453916	0.837459	0.956414
+pH fractionation/SP	High	P07910-2		Isoform C1 of Heterogeneous nuclear ribonucleoproteins C1/C2 OS=Homo sapiens OX=9606 GN=HNRNPC	ENSG00000092199	HNRNPC	0	4.42869	4.30717	0.079067	0.349262	0.588269	0.774518	-0.12152	0.588269	0.771733	9.58527	9.50693	0.299274	0.226539	0.735995	0.921826	-0.0783447	0.735995	0.928386
+pH fractionation/SP	High	P07919		Cytochrome b-c1 complex subunit 6, mitochondrial OS=Homo sapiens OX=9606 GN=UQCRH PE=1 SV=2	ENSG00000173660	UQCRH	0.007	-4.40074	-4.45402	1.72466	0.84073	0.972245	0.987824	-0.0292906	0.979522	0.989975	-5.90749		N.D.	N.D.	N.D.	NA	-0.0708505	0.811397	0.948236
+pH fractionation/SP	High	P07947		Tyrosine-protein kinase Yes OS=Homo sapiens OX=9606 GN=YES1 PE=1 SV=3	ENSG00000176105	YES1	0	-2.10188	-0.59939	0.613911	0.412574	0.0244868	0.174211	1.50249	0.0244868	0.179841	0.219582	1.16667	0.97337	0.398614	0.193872	0.63909	0.947088	0.193872	0.637897
+pH fractionation/SP	High	P07954		Fumarate hydratase, mitochondrial OS=Homo sapiens OX=9606 GN=FH PE=1 SV=3	ENSG00000091483	FH	0	5.50837	5.00892	0.207338	0.331708	0.0914761	0.311797	-0.499452	0.0914761	0.321078	2.34274	2.29988	0.658802	0.265436	0.921785	0.980131	-0.0428623	0.921785	0.979932
+pH fractionation/SP	High	P08047		Transcription factor Sp1 OS=Homo sapiens OX=9606 GN=SP1 PE=1 SV=3	ENSG00000185591	SP1	0.001	-2.07431	-3.21995	0.640866	0.167912	0.0401325	0.211068	-1.14563	0.0401325	0.220172	-0.596955	-1.39023	0.378035	1.25522	0.353733	0.755128	-0.793278	0.353733	0.75752
+pH fractionation/SP	High	P08133		Annexin A6 OS=Homo sapiens OX=9606 GN=ANXA6 PE=1 SV=3	ENSG00000197043	ANXA6	0	5.97213	6.38036	0.454201	0.220835	0.234086	0.494803	0.408236	0.234086	0.497469	7.04443	7.29594	1.17184	0.453255	0.746278	0.923001	0.251509	0.746278	0.92931
+pH fractionation/SP	High	P08134		Rho-related GTP-binding protein RhoC OS=Homo sapiens OX=9606 GN=RHOC PE=1 SV=1	ENSG00000155366	RHOC	0	-2.86912	-1.99434	1.81873	0.991748	0.505072	0.722649	0.874772	0.505072	0.718946	-2.68835	-4.40676	0.182791	1.44588	0.110658	0.523768	-1.71841	0.110658	0.530312
+pH fractionation/SP	High	P08195-4		Isoform 4 of 4F2 cell-surface antigen heavy chain OS=Homo sapiens OX=9606 GN=SLC3A2		SLC3A2	0	5.32947	5.42071	0.204853	0.243495	0.645501	0.808727	0.0912395	0.645501	0.806758	1.4704	2.08169	0.315976	0.101715	0.0332273	0.359164	0.611291	0.0332273	0.370773
+pH fractionation/SP	High	P08236		Beta-glucuronidase OS=Homo sapiens OX=9606 GN=GUSB PE=1 SV=2	ENSG00000169919	GUSB	0.002	-3.17689	-2.65965	0.0928312	0.566816	0.193826	0.453077	0.517239	0.193826	0.456958		-5.34304	N.D.	0.52556	N.D.	NA	0.951011	0.112172	0.532958
+pH fractionation/SP	High	P08238		Heat shock protein HSP 90-beta OS=Homo sapiens OX=9606 GN=HSP90AB1 PE=1 SV=4	ENSG00000096384	HSP90AB1	0	10.5532	9.9323	0.107595	0.424425	0.0699665	0.271431	-0.620945	0.0699665	0.283169	7.91547	8.22658	0.318148	0.223272	0.237887	0.675181	0.311116	0.237887	0.673867
+pH fractionation/SP	High	P08240		Signal recognition particle receptor subunit alpha OS=Homo sapiens OX=9606 GN=SRPRA PE=1 SV=2	ENSG00000182934	SRPR; SRPRA	0	0.605392	0.659179	0.118106	0.191303	0.699853	0.840567	0.0537875	0.699853	0.836848	0.281727	0.539693	0.388045	0.15053	0.343493	0.748218	0.257966	0.343493	0.750478
+pH fractionation/SP	High	P08243		Asparagine synthetase [glutamine-hydrolyzing] OS=Homo sapiens OX=9606 GN=ASNS PE=1 SV=4	ENSG00000070669	ASNS	0	1.36587	2.48847	0.264646	0.169272	0.00346357	0.0832295	1.1226	0.00346357	0.0836974	0.7208	0.705995	0.514152	0.356978	0.969283	0.992325	-0.0148058	0.969283	0.991668
+pH fractionation/SP	High	P08397		Porphobilinogen deaminase OS=Homo sapiens OX=9606 GN=HMBS PE=1 SV=2	ENSG00000281702	HMBS	0	1.90342	1.29425	0.183214	0.348551	0.0552559	0.240736	-0.609172	0.0552559	0.251382	-0.910375	-2.59484	1.67228	1.66965	0.284535	0.709704	-1.68446	0.284535	0.707762
+pH fractionation/SP	High	P08473		Neprilysin OS=Homo sapiens OX=9606 GN=MME PE=1 SV=2	ENSG00000196549	MME	0	-0.571373	-0.657649	0.957975	0.890998	0.914565	0.961898	-0.086276	0.914565	0.961997	1.09907	1.19142	0.736395	0.454772	0.86237	0.963032	0.0923495	0.86237	0.963349
+pH fractionation/SP	High	P08559-4		Isoform 4 of Pyruvate dehydrogenase E1 component subunit alpha, somatic form, mitochondrial OS=Homo sapiens OX=9606 GN=PDHA1	ENSG00000131828	PDHA1	0	2.29071	2.28521	0.0175529	0.238709	0.970185	0.987026	-0.00549526	0.970185	0.986554	1.13646	1.18031	0.497455	0.191911	0.893606	0.97137	0.0438537	0.893606	0.970211
+pH fractionation/SP	High	P08574		Cytochrome c1, heme protein, mitochondrial OS=Homo sapiens OX=9606 GN=CYC1 PE=1 SV=3	ENSG00000179091	CYC1	0	1.75832	0.231782	0.196832	1.02969	0.0652085	0.260077	-1.52653	0.0652085	0.271596	-0.98885	-1.1469	0.752718	0.394171	0.763458	0.93026	-0.158045	0.763458	0.935369
+pH fractionation/SP	High	P08575		Receptor-type tyrosine-protein phosphatase C OS=Homo sapiens OX=9606 GN=PTPRC PE=1 SV=3		PTPRC	0	5.47663	6.02267	0.191166	0.191791	0.0250647	0.174329	0.546033	0.0250647	0.179841	3.34647	3.47782	0.140657	0.127375	0.296742	0.717646	0.131346	0.296742	0.717418
+pH fractionation/SP	High	P08579		U2 small nuclear ribonucleoprotein B'' OS=Homo sapiens OX=9606 GN=SNRPB2 PE=1 SV=1	ENSG00000125870	SNRPB2	0	2.42446	1.32002	0.533176	1.34516	0.256689	0.518993	-1.10445	0.256689	0.519975	3.14781	2.4859	1.27753	1.78692	0.629296	0.884655	-0.661908	0.629296	0.890031
+pH fractionation/SP	High	P08621		U1 small nuclear ribonucleoprotein 70 kDa OS=Homo sapiens OX=9606 GN=SNRNP70 PE=1 SV=2	ENSG00000104852	SNRNP70	0	3.76045	3.30546	0.171326	0.0460907	0.0113179	0.127088	-0.454985	0.0113179	0.127152	6.00247	5.71507	0.235953	0.376081	0.324947	0.741061	-0.287405	0.324947	0.743334
+pH fractionation/SP	High	P08670		Vimentin OS=Homo sapiens OX=9606 GN=VIM PE=1 SV=4	ENSG00000026025	VIM	0	5.52131	7.22437	0.229638	0.694443	0.0156955	0.147226	1.70306	0.0156955	0.150577	9.62423	11.0674	0.579734	0.686945	0.0497787	0.420675	1.44314	0.0497787	0.43077
+pH fractionation/SP	High	P08708		40S ribosomal protein S17 OS=Homo sapiens OX=9606 GN=RPS17 PE=1 SV=2	ENSG00000278229	RPS17; RPS17L	0	4.01893	3.71649	0.210933	0.264388	0.196345	0.455779	-0.302444	0.196345	0.45906	5.50444	4.79027	0.231511	0.4215	0.0618331	0.452851	-0.714165	0.0618331	0.460902
+pH fractionation/SP	High	P08754		Guanine nucleotide-binding protein G(k) subunit alpha OS=Homo sapiens OX=9606 GN=GNAI3 PE=1 SV=3	ENSG00000065135	GNAI3	0	0.217043	0.171744	0.870484	0.515004	0.941892	0.974467	-0.045299	0.941892	0.974161	0.316092	0.893782	1.26223	0.24747	0.480071	0.831047	0.57769	0.480071	0.833616
+pH fractionation/SP	High	P08758		Annexin A5 OS=Homo sapiens OX=9606 GN=ANXA5 PE=1 SV=2	ENSG00000164111	ANXA5	0	3.32864	3.5457	0.224647	0.298418	0.371102	0.623413	0.217064	0.371102	0.617899	1.20255	2.10723	1.47336	0.88475	0.413473	0.795127	0.904679	0.413473	0.802661
+pH fractionation/SP	High	P08779		Keratin, type I cytoskeletal 16 OS=Homo sapiens OX=9606 GN=KRT16 PE=1 SV=4	ENSG00000186832	KRT16	0	0.937284	0.481771	0.380363	0.650066	0.353974	0.60818	-0.455513	0.353974	0.603358	0.49175	1.86101	1.54181	0.986984	0.264854	0.700794	1.36926	0.264854	0.696109
+pH fractionation/SP	High	P08865		40S ribosomal protein SA OS=Homo sapiens OX=9606 GN=RPSA PE=1 SV=4	ENSG00000168028	RPSA	0	5.09274	4.97171	0.207001	0.234301	0.539278	0.74412	-0.121024	0.539278	0.740279	6.39298	5.29637	0.4391	0.45597	0.0399221	0.389828	-1.09661	0.0399221	0.401022
+pH fractionation/SP	High	P08962		CD63 antigen OS=Homo sapiens OX=9606 GN=CD63 PE=1 SV=2	ENSG00000135404	CD63	0.008	-3.31455	-2.73935	0.709905	0.175448	0.244739	0.50699	0.575199	0.244739	0.508641			N.D.	N.D.	N.D.	NA	0.297533	0.0332921	0.370773
+pH fractionation/SP	High	P09001		39S ribosomal protein L3, mitochondrial OS=Homo sapiens OX=9606 GN=MRPL3 PE=1 SV=1	ENSG00000114686	MRPL3	0	0.906678	0.67132	0.306419	0.196392	0.325394	0.586465	-0.235357	0.325394	0.581959	-1.42349	-0.556166	0.248965	0.359268	0.0263695	0.328594	0.867326	0.0263695	0.339425
+pH fractionation/SP	High	P09012		U1 small nuclear ribonucleoprotein A OS=Homo sapiens OX=9606 GN=SNRPA PE=1 SV=3	ENSG00000077312	SNRPA	0	3.35229	2.18066	0.963162	0.411432	0.124728	0.364612	-1.17162	0.124728	0.370004	3.98864	3.85758	0.585315	0.315305	0.749958	0.924837	-0.131058	0.749958	0.93056
+pH fractionation/SP	High	P09104		Gamma-enolase OS=Homo sapiens OX=9606 GN=ENO2 PE=1 SV=3	ENSG00000111674	ENO2	0	3.1068	3.12242	0.189425	0.0741794	0.900621	0.956126	0.0156202	0.900621	0.954859	1.34135	1.3199	1.08723	0.597187	0.977536	0.99425	-0.0214547	0.977536	0.994594
+pH fractionation/SP	High	P09110		3-ketoacyl-CoA thiolase, peroxisomal OS=Homo sapiens OX=9606 GN=ACAA1 PE=1 SV=2	ENSG00000060971	ACAA1	0	0.616873	1.16557	0.223033	0.365742	0.0907617	0.311128	0.548698	0.0907617	0.320892	-1.71271	-0.864819	0.536051	1.2225	0.333013	0.74308	0.847891	0.333013	0.745179
+pH fractionation/SP	High	P09132		Signal recognition particle 19 kDa protein OS=Homo sapiens OX=9606 GN=SRP19 PE=1 SV=3	ENSG00000153037	SRP19	0.001	-0.956394	-2.00341	0.435929	1.31222	0.259896	0.522746	-1.04701	0.259896	0.523289	-3.42509	-3.74456	0.994394	2.2328	0.831996	0.951777	-0.319475	0.831996	0.955278
+pH fractionation/SP	High	P09211		Glutathione S-transferase P OS=Homo sapiens OX=9606 GN=GSTP1 PE=1 SV=2	ENSG00000084207	GSTP1	0	6.21361	6.72658	0.101471	0.475364	0.141574	0.39003	0.51297	0.141574	0.395161	3.85512	4.04082	0.129523	0.360854	0.448724	0.81567	0.185698	0.448724	0.819249
+pH fractionation/SP	High	P09234		U1 small nuclear ribonucleoprotein C OS=Homo sapiens OX=9606 GN=SNRPC PE=1 SV=1	ENSG00000124562	SNRPC	0.001	-0.249497	-1.03253	0.245234	0.652771	0.123671	0.363082	-0.78303	0.123671	0.368568	1.71952	1.15405	0.324121	1.06112	0.427235	0.805294	-0.565468	0.427235	0.810874
+pH fractionation/SP	High	P09326		CD48 antigen OS=Homo sapiens OX=9606 GN=CD48 PE=1 SV=2	ENSG00000117091	CD48	0	-4.39005	-0.936888	0.511064	0.669684	0.00207867	0.0698606	3.45316	0.00207867	0.0709934	-2.24276	1.81249	2.30855	0.0956949	0.0384043	0.385499	4.05525	0.0384043	0.395865
+pH fractionation/SP	High	P09382		Galectin-1 OS=Homo sapiens OX=9606 GN=LGALS1 PE=1 SV=2	ENSG00000100097	LGALS1	0	-2.84177	0.847258	0.902857	0.565935	0.00389105	0.0877953	3.68903	0.00389105	0.0870474	-2.3585	-0.845706	1.05113	0.712636	0.10805	0.520432	1.51279	0.10805	0.52668
+pH fractionation/SP	High	P09417		Dihydropteridine reductase OS=Homo sapiens OX=9606 GN=QDPR PE=1 SV=2	ENSG00000151552	QDPR	0	1.60214	1.12596	0.449328	0.628734	0.34598	0.604428	-0.476186	0.34598	0.600019	0.232502	0.501182	1.40993	1.9516	0.856151	0.959638	0.26868	0.856151	0.960471
+pH fractionation/SP	High	P09429		High mobility group protein B1 OS=Homo sapiens OX=9606 GN=HMGB1 PE=1 SV=3	ENSG00000189403	HMGB1	0	6.30416	5.92379	0.391681	0.0885231	0.17621	0.436102	-0.380374	0.17621	0.440591	5.22236	4.89348	0.348395	0.233272	0.245848	0.686308	-0.328871	0.245848	0.684128
+pH fractionation/SP	High	P09488		Glutathione S-transferase Mu 1 OS=Homo sapiens OX=9606 GN=GSTM1 PE=1 SV=3	ENSG00000134184	GSTM1	0	1.48312	0.882915	0.168347	0.484132	0.112445	0.346161	-0.6002	0.112445	0.35297	-1.9255	-0.784538	0.580296	0.328173	0.0413764	0.397486	1.14097	0.0413764	0.408482
+pH fractionation/SP	High	P09496-2		Isoform Non-brain of Clathrin light chain A OS=Homo sapiens OX=9606 GN=CLTA	ENSG00000122705	CLTA	0	0.43011	-0.424638	1.18922	1.45083	0.474148	0.701154	-0.854748	0.474148	0.697005	-3.70716	-1.58229	0.589194	0.429061	0.017536	0.283011	3.14211	0.0430306	0.415935
+pH fractionation/SP	High	P09497-2		Isoform Non-brain of Clathrin light chain B OS=Homo sapiens OX=9606 GN=CLTB	ENSG00000175416	CLTB	0	1.48644	0.186631	1.48196	2.185	0.441861	0.676231	-1.29981	0.441861	0.67265	-0.462459	-0.658543	1.19445	2.11956	0.895727	0.972289	-0.196083	0.895727	0.970972
+pH fractionation/SP	High	P09525		Annexin A4 OS=Homo sapiens OX=9606 GN=ANXA4 PE=1 SV=4		ANXA4	0	1.60984	1.91074	0.12322	0.0789181	0.0235496	0.170926	0.300899	0.0235496	0.176606	3.36818	2.55901	1.22153	2.36428	0.626288	0.883268	-0.80917	0.626288	0.888477
+pH fractionation/SP	High	P09543		2',3'-cyclic-nucleotide 3'-phosphodiesterase OS=Homo sapiens OX=9606 GN=CNP PE=1 SV=2	ENSG00000173786	CNP	0	4.01801	3.65565	0.677016	0.220552	0.427844	0.667387	-0.362368	0.427844	0.66259	1.44779	1.56433	0.477389	0.382018	0.757864	0.92828	0.11654	0.757864	0.933374
+pH fractionation/SP	High	P09622		Dihydrolipoyl dehydrogenase, mitochondrial OS=Homo sapiens OX=9606 GN=DLD PE=1 SV=2	ENSG00000091140	DLD	0	4.34273	4.24901	0.338035	0.482768	0.796629	0.896838	-0.0937176	0.796629	0.894985	1.98572	2.05758	0.325837	0.303456	0.793695	0.939822	0.0718594	0.793695	0.943598
+pH fractionation/SP	High	P09651		Heterogeneous nuclear ribonucleoprotein A1 OS=Homo sapiens OX=9606 GN=HNRNPA1 PE=1 SV=5	ENSG00000135486	HNRNPA1	0	5.29988	4.7313	0.146636	0.320436	0.0490818	0.226815	-0.568571	0.0490818	0.236544	9.41691	9.004	0.37164	0.468422	0.297723	0.717646	-0.412909	0.297723	0.717553
+pH fractionation/SP	High	P09661		U2 small nuclear ribonucleoprotein A' OS=Homo sapiens OX=9606 GN=SNRPA1 PE=1 SV=2	ENSG00000131876	SNRPA1	0	4.39111	2.83105	0.47041	1.47883	0.156615	0.408024	-1.56006	0.156615	0.413212	3.86325	4.4781	0.361669	0.582462	0.195316	0.639778	0.614852	0.195316	0.639009
+pH fractionation/SP	High	P09669		Cytochrome c oxidase subunit 6C OS=Homo sapiens OX=9606 GN=COX6C PE=1 SV=2	ENSG00000164919	COX6C	0.005	-2.58625	-1.70439	0.662963	0.708931	0.190676	0.448686	0.881863	0.190676	0.452374	-2.3934	-5.30315	2.57465	0.1427	0.226991	0.667758	-3.35193	0.0969074	0.508913
+pH fractionation/SP	High	P09693		T-cell surface glycoprotein CD3 gamma chain OS=Homo sapiens OX=9606 GN=CD3G PE=1 SV=1	ENSG00000160654	CD3G	0	1.23798	1.13543	0.189523	0.352863	0.680374	0.828272	-0.102547	0.680374	0.82545	-1.26592	-1.47033	0.814839	0.356944	0.710958	0.914799	-0.204414	0.710958	0.920582
+pH fractionation/SP	High	P09874		Poly [ADP-ribose] polymerase 1 OS=Homo sapiens OX=9606 GN=PARP1 PE=1 SV=4	ENSG00000143799	PARP1	0	5.46507	4.94739	0.161135	0.201313	0.0254149	0.175494	-0.517679	0.0254149	0.181086	7.36835	6.95294	0.100524	0.0676929	0.00403536	0.177943	-0.415416	0.00403536	0.182573
+pH fractionation/SP	High	P09884		DNA polymerase alpha catalytic subunit OS=Homo sapiens OX=9606 GN=POLA1 PE=1 SV=2	ENSG00000101868	POLA1	0	-0.2186	-3.48989	0.435266	1.86416	0.0508065	0.230138	-4.10245	0.0237335	0.177125	-5.10021	-3.58737	2.64636	0.689222	0.392226	0.781427	1.51284	0.392226	0.7889
+pH fractionation/SP	High	P09960		Leukotriene A-4 hydrolase OS=Homo sapiens OX=9606 GN=LTA4H PE=1 SV=2	ENSG00000111144	LTA4H	0	3.99365	4.35581	0.270063	0.356812	0.233614	0.494803	0.362158	0.233614	0.497469	1.00555	1.8824	0.0967089	0.420042	0.0243726	0.318213	0.876849	0.0243726	0.327718
+pH fractionation/SP	High	P09972		Fructose-bisphosphate aldolase C OS=Homo sapiens OX=9606 GN=ALDOC PE=1 SV=2	ENSG00000109107	ALDOC	0	3.95806	5.05198	0.70371	0.180916	0.0595638	0.251273	1.09393	0.0595638	0.261885	1.10065	1.82217	0.512811	0.551889	0.172486	0.614342	0.721521	0.172486	0.613644
+pH fractionation/SP	High	P0C0S5		Histone H2A.Z OS=Homo sapiens OX=9606 GN=H2AFZ PE=1 SV=2	ENSG00000164032	H2AFZ	0	-0.729616	-1.42904	0.324945	0.457855	0.0971379	0.322629	-0.699424	0.0971379	0.331758	6.09299	5.68854	0.42614	1.6031	0.694512	0.911794	-0.404441	0.694512	0.917901
+pH fractionation/SP	High	P0C1Z6		TCF3 fusion partner OS=Homo sapiens OX=9606 GN=TFPT PE=1 SV=1	ENSG00000276296	TFPT	0.002	-4.59719	-4.30495	0.111188	1.40975	0.738473	0.862905	0.292244	0.738473	0.860607	-2.22718	-2.26567	0.61778	0.598834	0.941955	0.984423	-0.0384927	0.941955	0.984421
+pH fractionation/SP	High	P0C7P0		CDGSH iron-sulfur domain-containing protein 3, mitochondrial OS=Homo sapiens OX=9606 GN=CISD3 PE=1 SV=1	ENSG00000274768	CISD3	0.004	-2.49103	-2.84038	0.197353	0.68051	0.441242	0.675568	-0.349348	0.441242	0.671962	-4.03801	-3.34349	1.52852	1.12709	0.560873	0.862393	0.694517	0.560873	0.862773
+pH fractionation/SP	High	P0CG08		Golgi pH regulator B OS=Homo sapiens OX=9606 GN=GPR89B PE=1 SV=1	ENSG00000188092	GPR89A; GPR89B	0	-3.00857	-2.29463	0.415315	0.916498	0.286443	0.54912	0.713944	0.286443	0.548168	-3.81938	-2.7538	0.437174	1.04502	0.314827	0.734228	0.7865	0.647637	0.898144
+pH fractionation/SP	High	P0CJ78		Zinc finger protein 865 OS=Homo sapiens OX=9606 GN=ZNF865 PE=1 SV=1	ENSG00000261221	ZNF865	0	-2.8772	-1.68217	0.406908	0.11911	0.00814931	0.110983	1.19503	0.00814931	0.110295	-1.82302	-1.00434	0.773417	0.661001	0.235838	0.674342	0.818678	0.235838	0.672716
+pH fractionation/SP	High	P0DMV9		Heat shock 70 kDa protein 1B OS=Homo sapiens OX=9606 GN=HSPA1B PE=1 SV=1	ENSG00000232804	HSPA1A; HSPA1B	0	3.5707	2.40275	0.0674388	0.478279	0.0138263	0.139918	-1.16795	0.0138263	0.142054	2.1018	1.76139	0.377628	0.784639	0.535484	0.85126	-0.340406	0.535484	0.851239
+pH fractionation/SP	High	P0DOX5		Immunoglobulin gamma-1 heavy chain OS=Homo sapiens OX=9606 PE=1 SV=1		IGG-1	0.002	-5.35599	-5.07113	0.471454	1.14514	0.71067	0.846883	0.284867	0.71067	0.844137	-4.7501	-4.98635	1.49146	2.26545	0.894039	0.97137	-0.744227	0.613813	0.884094
+pH fractionation/SP	High	P0DP25		Calmodulin-3 OS=Homo sapiens OX=9606 GN=CALM3 PE=1 SV=1	ENSG00000160014	CALM3; CALM2; CALM1	0	3.52622	3.42685	0.561699	0.634608	0.848989	0.927117	-0.0993632	0.848989	0.925989	2.03617	2.88101	1.1119	0.981717	0.379714	0.77544	0.844847	0.379714	0.779278
+pH fractionation/SP	High	P0DPB5		Protein POLR1D, isoform 2 OS=Homo sapiens OX=9606 GN=POLR1D PE=1 SV=1		POLR1D	0.001	-2.85499	-5.05633	0.460164	1.38452	0.0592127	0.251171	-2.20133	0.0592127	0.261506	1.22971	-0.00249574	0.499142	0.360573	0.0256755	0.324328	-1.23221	0.0256755	0.334241
+pH fractionation/SP	High	P0DPB6		DNA-directed RNA polymerases I and III subunit RPAC2 OS=Homo sapiens OX=9606 GN=POLR1D PE=1 SV=1		POLR1D	0	-3.85626	-4.38199	0.695114	0.682085	0.402714	0.647523	-0.525726	0.402714	0.641912	-1.08039	-2.26819	0.567019	0.574438	0.0633807	0.454619	-1.1878	0.0633807	0.461811
+pH fractionation/SP	High	P0DPD8		EEF1AKMT4-ECE2 readthrough transcript protein OS=Homo sapiens OX=9606 GN=EEF1AKMT4-ECE2 PE=2 SV=1		EEF1AKMT4-ECE2	0.002	-1.68009	-2.60044	0.295921	0.354057	0.0498801	0.228744	-2.05568	0.150301	0.406974	-4.58975	-4.89103	N.D.	0.362988	N.D.	NA	0.602233	0.527298	0.848065
+pH fractionation/SP	High	P10109		Adrenodoxin, mitochondrial OS=Homo sapiens OX=9606 GN=FDX1 PE=1 SV=1	ENSG00000137714	FDX1	0.001	0.622671	-1.01019	0.194136	2.32265	0.291717	0.553664	-1.63286	0.291717	0.553283	-3.15823	-1.99559	2.81205	0.155639	0.618419	0.881313	0.833802	0.729949	0.926698
+pH fractionation/SP	High	P10114		Ras-related protein Rap-2a OS=Homo sapiens OX=9606 GN=RAP2A PE=1 SV=1	ENSG00000125249	RAP2A	0.001	-4.3058	-4.17253	0.533879	0.123718	0.762772	0.878687	-0.467543	0.527879	0.734331	-5.23073	-5.19556	1.11237	1.28042	0.97582	0.99425	-0.370096	0.708619	0.919263
+pH fractionation/SP	High	P10124		Serglycin OS=Homo sapiens OX=9606 GN=SRGN PE=1 SV=3	ENSG00000122862	SRGN	0.005		-6.10563	N.D.	N.D.	N.D.	NA	0.114726	0.299864	0.559258	-4.51189	-2.1097	2.20261	0.319498	0.241524	0.679131	0.985712	0.632676	0.891993
+pH fractionation/SP	High	P10155		60 kDa SS-A/Ro ribonucleoprotein OS=Homo sapiens OX=9606 GN=TROVE2 PE=1 SV=2	ENSG00000116747	TROVE2	0	1.9985	2.36412	0.0877747	0.350125	0.154216	0.40581	0.365624	0.154216	0.41089	0.681312	0.765653	0.0873537	0.196055	0.533476	0.850155	0.0843409	0.533476	0.850209
+pH fractionation/SP	High	P10242-4		Isoform 4 of Transcriptional activator Myb OS=Homo sapiens OX=9606 GN=MYB	ENSG00000118513	MYB	0.001	-4.46166	-4.37669	1.58434	0.801465	0.937919	0.972732	0.0849736	0.937919	0.972467	-1.75042	-2.49455	1.18237	0.398362	0.471624	0.825922	-2.0678	0.239643	0.676032
+pH fractionation/SP	High	P10244		Myb-related protein B OS=Homo sapiens OX=9606 GN=MYBL2 PE=1 SV=1	ENSG00000101057	MYBL2	0.002		-6.04818	N.D.	N.D.	N.D.	NA	0.110184	0.644939	0.806449	-5.30402		2.41487	N.D.	N.D.	NA	-0.683764	0.578691	0.870475
+pH fractionation/SP	High	P10253		Lysosomal alpha-glucosidase OS=Homo sapiens OX=9606 GN=GAA PE=1 SV=4	ENSG00000171298	GAA	0	1.06868	2.39135	0.307902	0.457506	0.0142111	0.141405	1.32267	0.0142111	0.143597	-3.08923	-3.43581	1.29485	0.169368	0.744338	0.92292	-1.39844	0.340074	0.749359
+pH fractionation/SP	High	P10321		HLA class I histocompatibility antigen, Cw-7 alpha chain OS=Homo sapiens OX=9606 GN=HLA-C PE=1 SV=3	ENSG00000204525	HLA-C	0	-1.07466	-0.599676	0.215371	1.01018	0.470342	0.69895	0.474981	0.470342	0.694438	-3.84857	-2.78391	1.4192	1.45621	0.478377	0.830025	2.07186	0.22208	0.667399
+pH fractionation/SP	High	P10398		Serine/threonine-protein kinase A-Raf OS=Homo sapiens OX=9606 GN=ARAF PE=1 SV=2	ENSG00000078061	ARAF	0	0.610059	0.634137	0.270619	0.24113	0.913943	0.961898	0.0240782	0.913943	0.961851	0.6688	0.996971	1.31839	0.334742	0.697492	0.911794	0.328171	0.697492	0.918099
+pH fractionation/SP	High	P10412		Histone H1.4 OS=Homo sapiens OX=9606 GN=HIST1H1E PE=1 SV=2	ENSG00000168298	HIST1H1E	0	-1.29674	-2.37803	3.091	2.34488	0.654522	0.814999	-1.0813	0.654522	0.812958	2.06328	2.40929	0.996668	0.828047	0.667754	0.900412	0.34601	0.667754	0.905278
+pH fractionation/SP	High	P10515		Dihydrolipoyllysine-residue acetyltransferase component of pyruvate dehydrogenase complex, mitochondrial OS=Homo sapiens OX=9606 GN=DLAT PE=1 SV=3	ENSG00000150768	DLAT	0	3.17409	3.1796	0.188213	0.379489	0.983112	0.992196	0.00550757	0.983112	0.991434	1.28764	1.91513	0.243555	0.801623	0.264306	0.7007	0.627492	0.264306	0.696109
+pH fractionation/SP	High	P10599		Thioredoxin OS=Homo sapiens OX=9606 GN=TXN PE=1 SV=3	ENSG00000136810	TXN	0	5.99968	5.80763	0.493321	0.17257	0.559059	0.757577	-0.192055	0.559059	0.754067	3.14315	3.1307	0.744168	0.595165	0.983033	0.995395	-0.012447	0.983033	0.996009
+pH fractionation/SP	High	P10606		Cytochrome c oxidase subunit 5B, mitochondrial OS=Homo sapiens OX=9606 GN=COX5B PE=1 SV=2	ENSG00000135940	COX5B	0.001	-0.244058	0.781253	0.233207	0.614353	0.053954	0.238111	1.02531	0.053954	0.248567	-2.42496	-1.91785	0.702074	0.710251	0.428792	0.805913	0.507114	0.428792	0.811489
+pH fractionation/SP	High	P10619		Lysosomal protective protein OS=Homo sapiens OX=9606 GN=CTSA PE=1 SV=2	ENSG00000064601	CTSA	0.001	-1.09388	-0.719667	0.556048	0.233947	0.343128	0.602292	0.374209	0.343128	0.597298	-3.38882	-1.83409	0.755246	0.0554458	0.0236713	0.31388	1.55473	0.0236713	0.323512
+pH fractionation/SP	High	P10644		cAMP-dependent protein kinase type I-alpha regulatory subunit OS=Homo sapiens OX=9606 GN=PRKAR1A PE=1 SV=1	ENSG00000108946	PRKAR1A	0	3.73792	3.91059	0.649669	0.518466	0.737183	0.862233	0.172668	0.737183	0.860274	1.61105	1.74689	0.280104	0.636125	0.751998	0.926149	0.135844	0.751998	0.931263
+pH fractionation/SP	High	P10747-7		Isoform 7 of T-cell-specific surface glycoprotein CD28 OS=Homo sapiens OX=9606 GN=CD28	ENSG00000178562	CD28	0.002	-4.27246	-0.89545	0.429655	0.420818	0.000625825	0.0423622	3.37701	0.000625825	0.0416377	-4.30656	-2.97589	3.04072	2.47741	0.588352	0.871195	1.33067	0.588352	0.873155
+pH fractionation/SP	High	P10768		S-formylglutathione hydrolase OS=Homo sapiens OX=9606 GN=ESD PE=1 SV=2	ENSG00000139684	ESD	0	4.91054	4.90992	0.0586453	0.167829	0.995434	0.997366	-0.000624918	0.995434	0.997576	2.37168	2.77371	0.218165	0.782861	0.43984	0.810618	0.402029	0.43984	0.815188
+pH fractionation/SP	High	P10809		60 kDa heat shock protein, mitochondrial OS=Homo sapiens OX=9606 GN=HSPD1 PE=1 SV=2	ENSG00000144381	HSPD1	0	9.05643	8.60215	0.0887503	0.0887961	0.00330737	0.0819342	-0.454275	0.00330737	0.0818535	6.57952	6.62701	0.157104	0.277857	0.809333	0.944222	0.0474961	0.809333	0.94749
+pH fractionation/SP	High	P11021		Endoplasmic reticulum chaperone BiP OS=Homo sapiens OX=9606 GN=HSPA5 PE=1 SV=2	ENSG00000044574	HSPA5	0	6.82385	6.99432	0.202153	0.248251	0.408572	0.652575	0.170474	0.408572	0.647022	4.92229	5.13931	0.40911	0.174912	0.445791	0.81384	0.217014	0.445791	0.818268
+pH fractionation/SP	High	P11117		Lysosomal acid phosphatase OS=Homo sapiens OX=9606 GN=ACP2 PE=1 SV=3	ENSG00000134575	ACP2	0.004	-4.78612	-2.65274	0.438638	0.342319	0.00266837	0.0767917	2.13338	0.00266837	0.0785637	-2.27781	-3.04146	0.684809	1.82797	0.5352	0.85126	-0.763651	0.5352	0.851235
+pH fractionation/SP	High	P11142		Heat shock cognate 71 kDa protein OS=Homo sapiens OX=9606 GN=HSPA8 PE=1 SV=1	ENSG00000109971	HSPA8	0	9.78954	9.06723	0.20111	0.444409	0.0623243	0.25427	-0.722306	0.0623243	0.26563	8.18996	7.99189	0.295964	0.246555	0.423458	0.803785	-0.198075	0.423458	0.810874
+pH fractionation/SP	High	P11161		E3 SUMO-protein ligase EGR2 OS=Homo sapiens OX=9606 GN=EGR2 PE=1 SV=3	ENSG00000122877	EGR2	0.002			N.D.	N.D.	N.D.	NA	0.107943	0.54273	0.742569		-3.99115	N.D.	1.13989	N.D.	NA	1.92407	0.117532	0.540015
+pH fractionation/SP	High	P11166		Solute carrier family 2, facilitated glucose transporter member 1 OS=Homo sapiens OX=9606 GN=SLC2A1 PE=1 SV=2	ENSG00000117394	SLC2A1	0	1.21829	-0.726954	1.16352	1.35523	0.132315	0.376498	-1.94525	0.132315	0.382318	-0.485721	-0.682764	0.555535	0.852884	0.754245	0.926604	-0.197043	0.754245	0.931495
+pH fractionation/SP	High	P11169		Solute carrier family 2, facilitated glucose transporter member 3 OS=Homo sapiens OX=9606 GN=SLC2A3 PE=1 SV=1	ENSG00000059804	SLC2A3	0	-0.464709	2.34711	0.477537	0.177618	0.000669104	0.0424239	2.81182	0.000669104	0.041953	-0.534049	0.24368	0.940075	0.452596	0.266233	0.700794	0.777729	0.266233	0.696109
+pH fractionation/SP	High	P11171		Protein 4.1 OS=Homo sapiens OX=9606 GN=EPB41 PE=1 SV=4	ENSG00000159023	EPB41	0	2.37848	0.781392	0.210343	0.532211	0.00843803	0.112655	-1.59709	0.00843803	0.111325	0.878473	0.430716	0.153309	0.385157	0.134705	0.558795	-0.447757	0.134705	0.559897
+pH fractionation/SP	High	P11172		Uridine 5'-monophosphate synthase OS=Homo sapiens OX=9606 GN=UMPS PE=1 SV=1	ENSG00000114491	UMPS	0	5.05006	4.91983	0.0733658	0.599305	0.727667	0.855262	-0.130231	0.727667	0.853833	2.96971	3.74877	0.305601	1.10605	0.304834	0.722122	0.779058	0.304834	0.723078
+pH fractionation/SP	High	P11177		Pyruvate dehydrogenase E1 component subunit beta, mitochondrial OS=Homo sapiens OX=9606 GN=PDHB PE=1 SV=3	ENSG00000168291	PDHB	0	2.37452	2.48556	0.367167	0.260203	0.691111	0.833913	0.111039	0.691111	0.830532	-0.206708	0.297627	0.20682	1.00124	0.441026	0.811025	0.504335	0.441026	0.815517
+pH fractionation/SP	High	P11182		Lipoamide acyltransferase component of branched-chain alpha-keto acid dehydrogenase complex, mitochondrial OS=Homo sapiens OX=9606 GN=DBT PE=1 SV=3		DBT	0	0.600306	1.39596	0.170339	0.127894	0.00294039	0.0800862	0.795653	0.00294039	0.0799484	-1.52146	-0.717996	0.196133	0.529713	0.0694157	0.460647	0.803459	0.0694157	0.467905
+pH fractionation/SP	High	P11216		Glycogen phosphorylase, brain form OS=Homo sapiens OX=9606 GN=PYGB PE=1 SV=5	ENSG00000100994	PYGB	0	3.07852	3.20306	0.233339	0.121041	0.457968	0.688026	0.124536	0.457968	0.683218	2.88213	2.74255	0.709095	0.756649	0.827102	0.95145	-0.139578	0.827102	0.955087
+pH fractionation/SP	High	P11233		Ras-related protein Ral-A OS=Homo sapiens OX=9606 GN=RALA PE=1 SV=1	ENSG00000006451	RALA	0	0.649427	0.552941	0.199986	0.147417	0.538028	0.743463	-0.0964859	0.538028	0.739356	0.13711	-0.867672	1.46215	0.982966	0.379176	0.77544	-1.00478	0.379176	0.779278
+pH fractionation/SP	High	P11234-2		Isoform 2 of Ras-related protein Ral-B OS=Homo sapiens OX=9606 GN=RALB		RALB	0	-5.8813	-3.18119	0.0233345	0.73492	0.0160162	0.147226	2.86406	0.00325417	0.0815624	-5.54462	-4.26925	0.0419078	N.D.	N.D.	NA	0.287462	0.74171	0.92892
+pH fractionation/SP	High	P11274		Breakpoint cluster region protein OS=Homo sapiens OX=9606 GN=BCR PE=1 SV=2	ENSG00000186716	BCR	0	0.794424	0.981228	0.0533759	0.303529	0.353024	0.608145	0.186803	0.353024	0.603282	1.34611	1.70477	0.444643	0.186889	0.267207	0.70137	0.358667	0.267207	0.696109
+pH fractionation/SP	High	P11279		Lysosome-associated membrane glycoprotein 1 OS=Homo sapiens OX=9606 GN=LAMP1 PE=1 SV=3	ENSG00000185896	LAMP1	0	2.35242	2.75206	0.298188	0.241604	0.145622	0.394508	0.399643	0.145622	0.399796	-0.651153	-0.211439	0.494985	0.262317	0.245569	0.685941	0.439714	0.245569	0.683723
+pH fractionation/SP	High	P11310-2		Isoform 2 of Medium-chain specific acyl-CoA dehydrogenase, mitochondrial OS=Homo sapiens OX=9606 GN=ACADM	ENSG00000117054	ACADM	0	3.30503	3.9657	0.464103	0.219875	0.0897862	0.309772	0.660673	0.0897862	0.319649	1.92934	2.93305	0.750445	0.100873	0.0833098	0.482222	1.00371	0.0833098	0.488325
+pH fractionation/SP	High	P11387		DNA topoisomerase 1 OS=Homo sapiens OX=9606 GN=TOP1 PE=1 SV=2	ENSG00000198900	TOP1	0	4.50962	4.69866	0.662494	1.12661	0.814523	0.905947	0.18904	0.814523	0.903986	7.28867	7.25026	0.203343	0.106407	0.786282	0.937087	-0.0384158	0.786282	0.94115
+pH fractionation/SP	High	P11388-4		Isoform 4 of DNA topoisomerase 2-alpha OS=Homo sapiens OX=9606 GN=TOP2A		TOP2A	0	3.31574	3.26546	0.0704276	0.428265	0.85076	0.927997	-0.0502794	0.85076	0.926737	8.59804	7.2017	0.0660542	0.0987739	3.44056e-05	0.0434292	-1.39633	3.44056e-05	0.04696
+pH fractionation/SP	High	P11413-2		Isoform Long of Glucose-6-phosphate 1-dehydrogenase OS=Homo sapiens OX=9606 GN=G6PD	ENSG00000160211	G6PD	0	4.96506	5.40662	0.137729	0.125292	0.0147611	0.144484	0.441559	0.0147611	0.147122	2.58647	3.23328	0.248413	0.135055	0.0166481	0.275224	0.646805	0.0166481	0.28521
+pH fractionation/SP	High	P11441		Ubiquitin-like protein 4A OS=Homo sapiens OX=9606 GN=UBL4A PE=1 SV=1	ENSG00000102178	UBL4A	0	0.276291	-0.0727921	0.157097	0.350328	0.19042	0.448686	-0.349083	0.19042	0.452374	-2.95432	-3.2925	0.509358	0.824631	0.578229	0.868695	-0.338182	0.578229	0.870475
+pH fractionation/SP	High	P11498		Pyruvate carboxylase, mitochondrial OS=Homo sapiens OX=9606 GN=PC PE=1 SV=2	ENSG00000173599	PC	0	2.0797	1.44446	0.667805	0.684979	0.314167	0.575413	-0.635246	0.314167	0.571547	-0.24614	-0.125554	0.365658	0.223263	0.651415	0.891842	0.120586	0.651415	0.898358
+pH fractionation/SP	High	P11586		C-1-tetrahydrofolate synthase, cytoplasmic OS=Homo sapiens OX=9606 GN=MTHFD1 PE=1 SV=3		MTHFD1	0	6.80358	6.00516	0.326085	0.306971	0.0366476	0.206164	-0.798422	0.0366476	0.21352	4.75376	4.93022	0.397483	0.166578	0.517371	0.841129	0.176457	0.517371	0.841442
+pH fractionation/SP	High	P11717		Cation-independent mannose-6-phosphate receptor OS=Homo sapiens OX=9606 GN=IGF2R PE=1 SV=3	ENSG00000197081	IGF2R	0	3.70624	3.61462	0.310396	0.430803	0.77993	0.890231	-0.0916187	0.77993	0.887415	2.85604	2.70342	1.82091	1.58159	0.918004	0.978402	-0.15262	0.918004	0.977626
+pH fractionation/SP	High	P11766		Alcohol dehydrogenase class-3 OS=Homo sapiens OX=9606 GN=ADH5 PE=1 SV=4	ENSG00000197894	ADH5	0	4.40976	4.84917	0.1202	0.190033	0.0276645	0.181832	0.439408	0.0276645	0.188208	1.71051	2.60484	0.220409	0.501852	0.0475341	0.414597	0.894332	0.0475341	0.42581
+pH fractionation/SP	High	P11802		Cyclin-dependent kinase 4 OS=Homo sapiens OX=9606 GN=CDK4 PE=1 SV=2	ENSG00000135446	CDK4	0.002	-3.95083	-6.57073	0.453974	0.411557	0.026278	0.178379	-1.7631	0.072243	0.288016	-6.73598	-7.32318	N.D.	N.D.	N.D.	NA	-0.191888	0.53028	0.849021
+pH fractionation/SP	High	P11908-2		Isoform 2 of Ribose-phosphate pyrophosphokinase 2 OS=Homo sapiens OX=9606 GN=PRPS2	ENSG00000101911	PRPS2	0	2.53736	1.94386	0.308435	0.105862	0.0344362	0.201094	-0.593498	0.0344362	0.208284	0.466654	0.901684	0.513529	0.34252	0.289245	0.70987	0.43503	0.289245	0.708363
+pH fractionation/SP	High	P11940		Polyadenylate-binding protein 1 OS=Homo sapiens OX=9606 GN=PABPC1 PE=1 SV=2	ENSG00000070756	PABPC1	0	5.83384	5.24233	0.116614	0.319615	0.0394991	0.210225	-0.591509	0.0394991	0.219235	6.13961	5.501	0.106057	0.16205	0.0046484	0.186708	-0.638604	0.0046484	0.194535
+pH fractionation/SP	High	P12004		Proliferating cell nuclear antigen OS=Homo sapiens OX=9606 GN=PCNA PE=1 SV=1	ENSG00000132646	PCNA	0	6.22315	5.55242	0.174717	0.181215	0.00991736	0.120361	-0.670729	0.00991736	0.119545	5.71619	4.00135	0.181819	0.249714	0.000654	0.0949935	-1.71483	0.000654	0.0905525
+pH fractionation/SP	High	P12081		Histidine--tRNA ligase, cytoplasmic OS=Homo sapiens OX=9606 GN=HARS PE=1 SV=2	ENSG00000170445	HARS	0	4.49091	4.68574	0.303072	0.208988	0.41121	0.655047	0.194822	0.41121	0.649393	2.13833	2.31374	1.097	0.243703	0.800259	0.941936	0.175408	0.800259	0.944493
+pH fractionation/SP	High	P12235		ADP/ATP translocase 1 OS=Homo sapiens OX=9606 GN=SLC25A4 PE=1 SV=4	ENSG00000151729	SLC25A4	0	0.326253	0.375523	0.0816482	0.22398	0.73846	0.862905	0.04927	0.73846	0.860607	-0.107844	-0.545045	2.56713	1.53807	0.81271	0.945314	-0.437201	0.81271	0.948624
+pH fractionation/SP	High	P12236		ADP/ATP translocase 3 OS=Homo sapiens OX=9606 GN=SLC25A6 PE=1 SV=4	ENSG00000169100	SLC25A6	0	7.31284	6.94678	0.219549	0.131699	0.0684676	0.267789	-0.366059	0.0684676	0.279761	4.94178	5.0675	0.0863226	0.0288638	0.0749796	0.467839	0.125717	0.0749796	0.475706
+pH fractionation/SP	High	P12268		Inosine-5'-monophosphate dehydrogenase 2 OS=Homo sapiens OX=9606 GN=IMPDH2 PE=1 SV=2	ENSG00000178035	IMPDH2	0	5.67606	4.08735	0.0436141	0.336952	0.00126338	0.0584969	-1.58871	0.00126338	0.0580176	3.23189	3.48095	0.106854	0.376858	0.332593	0.74308	0.249058	0.332593	0.745179
+pH fractionation/SP	High	P12270		Nucleoprotein TPR OS=Homo sapiens OX=9606 GN=TPR PE=1 SV=3	ENSG00000047410	TPR	0	4.01156	3.73272	0.265318	0.117113	0.171186	0.429394	-0.278837	0.171186	0.433507	6.62907	7.0612	0.317067	0.329543	0.177034	0.619235	0.432133	0.177034	0.618326
+pH fractionation/SP	High	P12532-2		Isoform 2 of Creatine kinase U-type, mitochondrial OS=Homo sapiens OX=9606 GN=CKMT1A		CKMT1A; CKMT1B	0.002	-1.81464	-2.08006	0.559609	0.295857	0.507896	0.724317	-0.265424	0.507896	0.720495	-4.17006	-3.17793	0.773285	1.01256	0.248711	0.687922	0.992138	0.248711	0.686039
+pH fractionation/SP	High	P12544		Granzyme A OS=Homo sapiens OX=9606 GN=GZMA PE=1 SV=2	ENSG00000145649	GZMA	0	-1.69171	0.965057	0.0839606	1.08327	0.013314	0.1378	2.65677	0.013314	0.139395	-0.855922	5.06151	0.597454	0.926402	0.000744524	0.0996076	5.91743	0.000744524	0.0960636
+pH fractionation/SP	High	P12694-2		Isoform 2 of 2-oxoisovalerate dehydrogenase subunit alpha, mitochondrial OS=Homo sapiens OX=9606 GN=BCKDHA	ENSG00000248098	BCKDHA	0	0.828015	1.1385	0.368353	0.237767	0.287233	0.550037	0.310487	0.287233	0.549014	-0.938295	-0.204418	0.308438	0.36499	0.0563903	0.438885	0.733877	0.0563903	0.447765
+pH fractionation/SP	High	P12814		Alpha-actinin-1 OS=Homo sapiens OX=9606 GN=ACTN1 PE=1 SV=2	ENSG00000072110	ACTN1	0	5.93832	7.31941	0.237463	0.0330525	0.000566932	0.0410231	1.38109	0.000566932	0.0401348	4.7026	5.70779	0.164308	0.337983	0.00978665	0.236571	1.00518	0.00978665	0.244292
+pH fractionation/SP	High	P12931-2		Isoform 2 of Proto-oncogene tyrosine-protein kinase Src OS=Homo sapiens OX=9606 GN=SRC	ENSG00000197122	SRC	0	-3.58795	-2.49052	1.45193	1.35233	0.392317	0.641702	1.09743	0.392317	0.635423	-3.39806	-1.7025	1.06434	0.769824	0.153194	0.582688	0.125003	0.945411	0.984819
+pH fractionation/SP	High	P12955		Xaa-Pro dipeptidase OS=Homo sapiens OX=9606 GN=PEPD PE=1 SV=3	ENSG00000124299	PEPD	0	1.97185	2.08086	0.0255663	0.43019	0.683908	0.828894	0.109012	0.683908	0.826368	-0.111061	-0.141486	1.89592	1.20915	0.982426	0.995057	-0.030425	0.982426	0.995769
+pH fractionation/SP	High	P12956		X-ray repair cross-complementing protein 6 OS=Homo sapiens OX=9606 GN=XRCC6 PE=1 SV=2	ENSG00000196419	XRCC6	0	5.64357	5.52083	0.0856883	0.118877	0.220453	0.482897	-0.122746	0.220453	0.485756	6.65752	6.38103	0.105263	0.155011	0.062918	0.4534	-0.276485	0.062918	0.46179
+pH fractionation/SP	High	P13010		X-ray repair cross-complementing protein 5 OS=Homo sapiens OX=9606 GN=XRCC5 PE=1 SV=3	ENSG00000079246	XRCC5	0	5.61002	5.75523	0.139259	0.0322272	0.153304	0.405165	0.145206	0.153304	0.410047	6.45176	6.22005	0.21921	0.12486	0.186849	0.628058	-0.231712	0.186849	0.627826
+pH fractionation/SP	High	P13073		Cytochrome c oxidase subunit 4 isoform 1, mitochondrial OS=Homo sapiens OX=9606 GN=COX4I1 PE=1 SV=1	ENSG00000131143	COX4I1	0	3.40944	3.03556	0.425764	0.273288	0.269739	0.533092	-0.373883	0.269739	0.532604	0.325592	0.157143	0.535774	0.385374	0.681282	0.906152	-0.168448	0.681282	0.911048
+pH fractionation/SP	High	P13473-3		Isoform LAMP-2C of Lysosome-associated membrane glycoprotein 2 OS=Homo sapiens OX=9606 GN=LAMP2	ENSG00000005893	LAMP2	0	1.79288	2.16111	0.510358	0.356503	0.363516	0.618428	0.368227	0.363516	0.613201	0.170035	0.352293	1.12188	0.334845	0.800782	0.941936	0.182258	0.800782	0.944575
+pH fractionation/SP	High	P13489		Ribonuclease inhibitor OS=Homo sapiens OX=9606 GN=RNH1 PE=1 SV=2	ENSG00000276230	RNH1	0	4.29471	3.984	0.304524	0.387344	0.336096	0.595839	-0.310714	0.336096	0.591097	2.55544	2.90581	0.483159	0.142047	0.294608	0.71591	0.350371	0.294608	0.715242
+pH fractionation/SP	High	P13498		Cytochrome b-245 light chain OS=Homo sapiens OX=9606 GN=CYBA PE=1 SV=3	ENSG00000051523	CYBA	0.003	-3.96006	-3.92754	1.88586	1.24713	0.981319	0.991011	0.0325175	0.981319	0.99021	-3.61761	-3.73614	1.03119	2.13866	0.948322	0.9853	0.957729	0.601452	0.879726
+pH fractionation/SP	High	P13591		Neural cell adhesion molecule 1 OS=Homo sapiens OX=9606 GN=NCAM1 PE=1 SV=3	ENSG00000149294	NCAM1	0.004	-4.47589	-3.13651	N.D.	0.886266	N.D.	NA	1.62039	0.239146	0.501303	-4.37722	-5.05464	N.D.	N.D.	N.D.	NA	-0.132315	0.886285	0.969051
+pH fractionation/SP	High	P13598		Intercellular adhesion molecule 2 OS=Homo sapiens OX=9606 GN=ICAM2 PE=1 SV=2	ENSG00000108622	ICAM2	0.001	-1.25461	-1.02588	0.762742	0.164566	0.717442	0.850735	-1.45887	0.450268	0.678348	-4.51775	-3.20856	0.203829	0.98905	0.17711	0.619235	2.09263	0.097912	0.508913
+pH fractionation/SP	High	P13612		Integrin alpha-4 OS=Homo sapiens OX=9606 GN=ITGA4 PE=1 SV=3	ENSG00000115232	ITGA4	0	3.04432	2.75052	0.0609527	0.321589	0.194983	0.454363	-0.293806	0.194983	0.458467	0.753104	0.84036	0.612145	0.256903	0.831079	0.95145	0.087256	0.831079	0.955087
+pH fractionation/SP	High	P13637-3		Isoform 3 of Sodium/potassium-transporting ATPase subunit alpha-3 OS=Homo sapiens OX=9606 GN=ATP1A3	ENSG00000105409	ATP1A3	0	-0.805944	-2.97629	0.347605	1.27571	0.046723	0.222918	-2.17034	0.046723	0.232214	-6.0332	-5.97173	1.78829	2.09402	0.971012	0.992362	0.061468	0.971012	0.991725
+pH fractionation/SP	High	P13639		Elongation factor 2 OS=Homo sapiens OX=9606 GN=EEF2 PE=1 SV=4	ENSG00000167658	EEF2	0	8.9383	8.35941	0.221149	0.15488	0.0205866	0.160813	-0.578895	0.0205866	0.166816	6.62351	7.00321	0.116509	0.242583	0.0709141	0.464237	0.379703	0.0709141	0.471197
+pH fractionation/SP	High	P13640		Metallothionein-1G OS=Homo sapiens OX=9606 GN=MT1G PE=1 SV=2	ENSG00000125144	MT1G	0.002	-0.126496	-2.12018	0.698653	3.76027	0.417646	0.659106	-1.99369	0.417646	0.654652	-5.59774	-2.29475	N.D.	N.D.	N.D.	NA	1.18836	0.464221	0.827652
+pH fractionation/SP	High	P13645		Keratin, type I cytoskeletal 10 OS=Homo sapiens OX=9606 GN=KRT10 PE=1 SV=6	ENSG00000186395	KRT10	0	7.70144	7.08981	0.98605	0.870687	0.465775	0.695192	-0.611625	0.465775	0.690043	7.50713	8.54675	0.743396	0.550359	0.123414	0.543722	1.03962	0.123414	0.547275
+pH fractionation/SP	High	P13646		Keratin, type I cytoskeletal 13 OS=Homo sapiens OX=9606 GN=KRT13 PE=1 SV=4	ENSG00000171401	KRT13	0	-1.6706	-3.19047	1.14529	1.18238	0.185021	0.445271	-1.51987	0.185021	0.449353	-4.53361	-3.1237	N.D.	1.11042	N.D.	NA	2.83021	0.0422267	0.409711
+pH fractionation/SP	High	P13647		Keratin, type II cytoskeletal 5 OS=Homo sapiens OX=9606 GN=KRT5 PE=1 SV=3	ENSG00000186081	KRT5	0	3.51322	3.12652	0.653308	0.568001	0.482287	0.709176	-0.386709	0.482287	0.70391	3.64962	4.59599	0.576735	0.270268	0.0617455	0.452851	0.946368	0.0617455	0.460902
+pH fractionation/SP	High	P13667		Protein disulfide-isomerase A4 OS=Homo sapiens OX=9606 GN=PDIA4 PE=1 SV=2	ENSG00000155660	PDIA4	0	5.52261	5.6829	0.377213	0.209668	0.555048	0.754614	0.160291	0.555048	0.751257	2.57415	2.75828	0.115888	0.0643826	0.0738925	0.467839	0.184137	0.0738925	0.47497
+pH fractionation/SP	High	P13674		Prolyl 4-hydroxylase subunit alpha-1 OS=Homo sapiens OX=9606 GN=P4HA1 PE=1 SV=2	ENSG00000122884	P4HA1	0	0.941662	0.92005	0.133034	0.344986	0.924234	0.965073	-0.0216113	0.924234	0.9656	0.573832	0.994799	0.251193	0.230754	0.0993506	0.506895	0.420968	0.0993506	0.511017
+pH fractionation/SP	High	P13693		Translationally-controlled tumor protein OS=Homo sapiens OX=9606 GN=TPT1 PE=1 SV=1	ENSG00000133112	TPT1	0	4.69341	4.11293	0.504752	0.636177	0.283392	0.547206	-0.580481	0.283392	0.545886	3.27498	2.89834	0.400329	0.431698	0.329973	0.742964	-0.376648	0.329973	0.743982
+pH fractionation/SP	High	P13716-2		Isoform 2 of Delta-aminolevulinic acid dehydratase OS=Homo sapiens OX=9606 GN=ALAD		ALAD	0	-1.72452	-0.87495	0.298758	0.319133	0.0281458	0.182476	0.849566	0.0281458	0.18897	-2.2144	-3.70834	2.08303	0.895126	0.317431	0.736605	-1.49394	0.317431	0.73851
+pH fractionation/SP	High	P13747		HLA class I histocompatibility antigen, alpha chain E OS=Homo sapiens OX=9606 GN=HLA-E PE=1 SV=3	ENSG00000230254	HLA-E	0	-4.11512	-2.33424	0.079909	0.267612	0.0120748	0.13189	1.25459	0.407544	0.646793		-5.66885	N.D.	N.D.	N.D.	NA	0.549867	0.133843	0.559735
+pH fractionation/SP	High	P13796		Plastin-2 OS=Homo sapiens OX=9606 GN=LCP1 PE=1 SV=6	ENSG00000136167	LCP1	0	8.36036	9.10909	0.293185	0.0563083	0.0122157	0.132624	0.748726	0.0122157	0.13325	5.01303	5.73415	0.341174	0.310595	0.0536947	0.428084	0.721124	0.0536947	0.437326
+pH fractionation/SP	High	P13797		Plastin-3 OS=Homo sapiens OX=9606 GN=PLS3 PE=1 SV=4	ENSG00000102024	PLS3	0	0.26883	0.0603956	0.202454	0.244354	0.318774	0.579874	-0.208434	0.318774	0.576042	-2.17639	-1.07543	3.21777	1.47599	0.618701	0.881313	1.10096	0.618701	0.885451
+pH fractionation/SP	High	P13798		Acylamino-acid-releasing enzyme OS=Homo sapiens OX=9606 GN=APEH PE=1 SV=4	ENSG00000164062	APEH	0	3.59902	3.93249	0.0615609	0.0300383	0.00108322	0.0565865	0.333475	0.00108322	0.0560539	1.3005	1.35767	0.539296	0.0739668	0.864497	0.963032	0.0571714	0.864497	0.963493
+pH fractionation/SP	High	P13804		Electron transfer flavoprotein subunit alpha, mitochondrial OS=Homo sapiens OX=9606 GN=ETFA PE=1 SV=1	ENSG00000140374	ETFA	0	3.35686	3.5039	0.295415	0.209549	0.520722	0.733468	0.147039	0.520722	0.729068	1.08827	1.69649	0.834667	0.681197	0.383521	0.776588	0.608227	0.383521	0.781417
+pH fractionation/SP	High	P13807		Glycogen [starch] synthase, muscle OS=Homo sapiens OX=9606 GN=GYS1 PE=1 SV=2	ENSG00000104812	GYS1	0	0.729184	1.06093	0.125096	0.285878	0.139373	0.38629	0.331749	0.139373	0.391451	1.51239	1.44934	0.544471	0.349786	0.87419	0.966143	-0.0630462	0.87419	0.966269
+pH fractionation/SP	High	P13861		cAMP-dependent protein kinase type II-alpha regulatory subunit OS=Homo sapiens OX=9606 GN=PRKAR2A PE=1 SV=2	ENSG00000114302	PRKAR2A	0	0.884967	0.933387	0.108787	0.219352	0.749201	0.869774	0.0484195	0.749201	0.867233	0.922122	0.746386	0.215945	0.514999	0.614678	0.880408	-0.175737	0.614678	0.884094
+pH fractionation/SP	High	P13929		Beta-enolase OS=Homo sapiens OX=9606 GN=ENO3 PE=1 SV=5	ENSG00000108515	ENO3	0	-4.42736	-2.37614	0.33233	1.67459	0.111204	0.345068	0.821411	0.593981	0.77538	-4.28156		N.D.	N.D.	N.D.	NA	-0.753289	0.378415	0.779174
+pH fractionation/SP	High	P13984		General transcription factor IIF subunit 2 OS=Homo sapiens OX=9606 GN=GTF2F2 PE=1 SV=2	ENSG00000188342	GTF2F2	0	1.0636	0.741093	0.584507	0.368022	0.464031	0.693881	-0.322505	0.464031	0.688654	-0.94701	-0.904907	0.157468	0.678712	0.92168	0.980131	0.0421027	0.92168	0.979932
+pH fractionation/SP	High	P13987		CD59 glycoprotein OS=Homo sapiens OX=9606 GN=CD59 PE=1 SV=1	ENSG00000085063	CD59	0	-1.01474	-0.241359	0.408718	0.143289	0.0364731	0.206164	0.773383	0.0364731	0.21352	1.62296	2.37363	0.0975064	0.599202	0.0988975	0.505138	0.750669	0.0988975	0.509198
+pH fractionation/SP	High	P13994		Coiled-coil domain-containing protein 130 OS=Homo sapiens OX=9606 GN=CCDC130 PE=1 SV=2	ENSG00000104957	CCDC130	0.002	-3.32199	-2.93606	0.0822338	0.649422	0.364921	0.619094	0.385927	0.364921	0.613782	-2.00268	-1.25048	0.175499	0.472986	0.061168	0.452851	0.752197	0.061168	0.460902
+pH fractionation/SP	High	P13995		Bifunctional methylenetetrahydrofolate dehydrogenase/cyclohydrolase, mitochondrial OS=Homo sapiens OX=9606 GN=MTHFD2 PE=1 SV=2	ENSG00000065911	MTHFD2	0	2.41501	2.68628	0.280114	0.513368	0.466752	0.696433	0.271275	0.466752	0.69129	0.209679	0.97168	0.468582	0.479611	0.120395	0.539946	0.762001	0.120395	0.543271
+pH fractionation/SP	High	P14151-2		Isoform 2 of L-selectin OS=Homo sapiens OX=9606 GN=SELL	ENSG00000188404	SELL	0	-2.48308	-1.20846	1.34379	3.29703	0.568785	0.76357	1.27462	0.568785	0.759814	-3.78704	-1.47976	0.47087	0.412539	0.0348935	0.366228	1.71805	0.427698	0.810874
+pH fractionation/SP	High	P14174		Macrophage migration inhibitory factor OS=Homo sapiens OX=9606 GN=MIF PE=1 SV=4	ENSG00000276701	MIF	0.003	3.02657	3.26958	0.134811	0.348053	0.322514	0.583586	0.243012	0.322514	0.578719	-0.462144	-0.157993	0.485698	0.368227	0.436165	0.809072	0.30415	0.436165	0.815188
+pH fractionation/SP	High	P14314		Glucosidase 2 subunit beta OS=Homo sapiens OX=9606 GN=PRKCSH PE=1 SV=2	ENSG00000130175	PRKCSH	0	5.42765	5.2593	0.262116	0.176403	0.40828	0.652538	-0.168353	0.40828	0.64697	1.35294	1.91872	0.428234	0.357519	0.15382	0.584537	0.565775	0.15382	0.583709
+pH fractionation/SP	High	P14317		Hematopoietic lineage cell-specific protein OS=Homo sapiens OX=9606 GN=HCLS1 PE=1 SV=3	ENSG00000180353	HCLS1	0	3.22405	3.93486	0.60518	0.0913711	0.114594	0.349705	0.71081	0.114594	0.356475	3.26732	4.32481	0.701087	0.748761	0.148702	0.575971	1.0575	0.148702	0.576683
+pH fractionation/SP	High	P14324-2		Isoform 2 of Farnesyl pyrophosphate synthase OS=Homo sapiens OX=9606 GN=FDPS	ENSG00000160752	FDPS	0	3.92482	3.96493	0.299136	0.210514	0.858642	0.932151	0.0401022	0.858642	0.931247	1.14341	1.16536	0.311228	0.273009	0.931219	0.982366	0.021959	0.931219	0.981403
+pH fractionation/SP	High	P14373		Zinc finger protein RFP OS=Homo sapiens OX=9606 GN=TRIM27 PE=1 SV=1	ENSG00000234495	TRIM27	0	-2.91167	-4.19226	0.297222	0.993023	0.0991055	0.326457	-1.28059	0.0991055	0.334685	0.692941	-0.13818	0.853876	0.870825	0.303263	0.721804	-0.831121	0.303263	0.722807
+pH fractionation/SP	High	P14406		Cytochrome c oxidase subunit 7A2, mitochondrial OS=Homo sapiens OX=9606 GN=COX7A2 PE=1 SV=1		COX7A2	0.002	-2.24638	-1.86495	0.526928	0.562872	0.439822	0.674818	0.381432	0.439822	0.671145	-4.25872	-4.0621	0.551363	0.423461	0.649885	0.891842	0.19662	0.649885	0.898358
+pH fractionation/SP	High	P14550		Alcohol dehydrogenase [NADP(+)] OS=Homo sapiens OX=9606 GN=AKR1A1 PE=1 SV=3	ENSG00000117448	AKR1A1	0	1.00518	2.31801	0.201001	0.0625098	0.000416515	0.0384856	1.31284	0.000416515	0.0361662	-0.729686	-0.68487	0.536318	0.437216	0.916084	0.977374	0.0448159	0.916084	0.97702
+pH fractionation/SP	High	P14618		Pyruvate kinase PKM OS=Homo sapiens OX=9606 GN=PKM PE=1 SV=4	ENSG00000067225	PKM	0	8.6984	9.73797	0.102691	0.108764	0.000273084	0.0347406	1.03957	0.000273084	0.0320945	6.2672	7.36317	0.135586	0.0920739	0.000317456	0.0608023	1.09597	0.000317456	0.0577724
+pH fractionation/SP	High	P14618-2		Isoform M1 of Pyruvate kinase PKM OS=Homo sapiens OX=9606 GN=PKM	ENSG00000067225	PKM	0	1.42028	1.82297	0.275515	0.717164	0.415293	0.658401	0.402698	0.415293	0.653144	-1.73652	-1.54742	0.743944	0.941042	0.798343	0.941705	0.189099	0.798343	0.944041
+pH fractionation/SP	High	P14621		Acylphosphatase-2 OS=Homo sapiens OX=9606 GN=ACYP2 PE=1 SV=2	ENSG00000170634	ACYP2	0.003	-2.93315	-1.21205	0.331283	0.166066	0.00129634	0.0584969	1.72111	0.00129634	0.0580176	-3.24955	-2.15916	2.8014	0.697251	0.548681	0.857951	1.0904	0.548681	0.85761
+pH fractionation/SP	High	P14625		Endoplasmin OS=Homo sapiens OX=9606 GN=HSP90B1 PE=1 SV=1	ENSG00000166598	HSP90B1	0	7.38701	7.57187	0.101979	0.13269	0.128266	0.370363	0.184858	0.128266	0.376046	5.21606	5.62398	0.220369	0.201638	0.0772066	0.472719	0.407922	0.0772066	0.481621
+pH fractionation/SP	High	P14635		G2/mitotic-specific cyclin-B1 OS=Homo sapiens OX=9606 GN=CCNB1 PE=1 SV=1	ENSG00000134057	CCNB1	0	0.0475353	-2.07371	0.436462	0.247807	0.00185285	0.0654765	-2.12124	0.00185285	0.0668462	0.54224	-0.860424	0.735231	0.703276	0.0753422	0.467839	-1.40266	0.0753422	0.476229
+pH fractionation/SP	High	P14649		Myosin light chain 6B OS=Homo sapiens OX=9606 GN=MYL6B PE=1 SV=1	ENSG00000196465	MYL6B	0	-2.24491	-1.44902	0.180176	0.573933	0.0837079	0.298453	0.79589	0.0837079	0.307869	-3.45436	-5.94581	1.14538	1.9594	0.212987	0.658658	-1.27786	0.499651	0.837575
+pH fractionation/SP	High	P14678-3		Isoform SM-B1 of Small nuclear ribonucleoprotein-associated proteins B and B' OS=Homo sapiens OX=9606 GN=SNRPB		SNRPB	0	1.87097	2.21396	0.380742	0.593109	0.446737	0.680297	0.34299	0.446737	0.676059	4.4423	3.99271	0.313635	0.612705	0.321143	0.739654	-0.449593	0.321143	0.741918
+pH fractionation/SP	High	P14735		Insulin-degrading enzyme OS=Homo sapiens OX=9606 GN=IDE PE=1 SV=4	ENSG00000119912	IDE	0	3.11333	3.24204	0.382433	0.229151	0.643305	0.807993	0.12871	0.643305	0.806101	0.832991	0.958624	0.216428	0.243065	0.540353	0.853939	0.125633	0.540353	0.85461
+pH fractionation/SP	High	P14854		Cytochrome c oxidase subunit 6B1 OS=Homo sapiens OX=9606 GN=COX6B1 PE=1 SV=2	ENSG00000126267	COX6B1	0.002	-1.84854	-1.54716	0.20303	0.494353	0.383981	0.634163	0.301387	0.383981	0.627876	-3.66835	-4.19057	1.68932	1.12929	0.698683	0.911794	0.386457	0.783296	0.940755
+pH fractionation/SP	High	P14866		Heterogeneous nuclear ribonucleoprotein L OS=Homo sapiens OX=9606 GN=HNRNPL PE=1 SV=2	ENSG00000282947	HNRNPL	0	4.52999	3.69897	0.78634	0.42304	0.182259	0.442391	-0.831016	0.182259	0.446751	8.49681	8.57735	0.175347	0.0819046	0.51087	0.838892	0.0805476	0.51087	0.840354
+pH fractionation/SP	High	P14868		Aspartate--tRNA ligase, cytoplasmic OS=Homo sapiens OX=9606 GN=DARS PE=1 SV=2	ENSG00000115866	DARS	0	5.88634	5.68886	0.173551	0.161235	0.222267	0.483578	-0.197476	0.222267	0.486613	4.77653	5.0165	0.124707	0.226577	0.183302	0.623536	0.239977	0.183302	0.622704
+pH fractionation/SP	High	P14921		Protein C-ets-1 OS=Homo sapiens OX=9606 GN=ETS1 PE=1 SV=1	ENSG00000134954	ETS1	0	-0.61257	-0.153029	0.772204	0.752327	0.501311	0.719623	0.459541	0.501311	0.715978	-0.325851	-0.0380464	1.02593	0.439349	0.678238	0.905616	0.287804	0.678238	0.910777
+pH fractionation/SP	High	P14923		Junction plakoglobin OS=Homo sapiens OX=9606 GN=JUP PE=1 SV=3	ENSG00000173801	JUP	0	-1.19057	-1.23196	0.908281	0.277342	0.943446	0.975369	-0.0413938	0.943446	0.97485	-0.804322	-0.448077	1.30271	1.00917	0.72708	0.921746	0.356245	0.72708	0.926698
+pH fractionation/SP	High	P14927		Cytochrome b-c1 complex subunit 7 OS=Homo sapiens OX=9606 GN=UQCRB PE=1 SV=2	ENSG00000156467	UQCRB	0	-0.717201	-1.01948	0.250256	0.432434	0.353824	0.60818	-0.302278	0.353824	0.603358	-1.71922	-3.9867	0.497807	3.45214	0.323141	0.740611	-2.26748	0.323141	0.743334
+pH fractionation/SP	High	P15104		Glutamine synthetase OS=Homo sapiens OX=9606 GN=GLUL PE=1 SV=4	ENSG00000135821	GLUL	0.001	-3.72433	-4.70969	1.56083	2.76853	0.619744	0.795749	-0.985364	0.619744	0.79334	-5.52586	-5.14973	1.81847	1.15945	0.816627	0.946987	-0.0823582	0.950215	0.985207
+pH fractionation/SP	High	P15121		Aldose reductase OS=Homo sapiens OX=9606 GN=AKR1B1 PE=1 SV=3	ENSG00000085662	AKR1B1	0	3.43991	3.69295	0.0241803	0.24992	0.155838	0.407783	0.253033	0.155838	0.412889	2.32941	1.554	0.701844	0.83672	0.286163	0.709704	-0.775412	0.286163	0.707762
+pH fractionation/SP	High	P15153		Ras-related C3 botulinum toxin substrate 2 OS=Homo sapiens OX=9606 GN=RAC2 PE=1 SV=1	ENSG00000128340	RAC2	0	5.22919	6.44216	0.316346	0.0433774	0.00276215	0.0775606	1.21297	0.00276215	0.0791084	2.92895	4.16644	0.32946	0.241024	0.00629424	0.199421	1.23749	0.00629424	0.205801
+pH fractionation/SP	High	P15170-3		Isoform 3 of Eukaryotic peptide chain release factor GTP-binding subunit ERF3A OS=Homo sapiens OX=9606 GN=GSPT1	ENSG00000103342	GSPT1	0	4.57255	4.26128	0.334926	0.362935	0.336325	0.59601	-0.311268	0.336325	0.591281	3.57765	2.34278	1.47958	0.346266	0.23202	0.667758	-1.23487	0.23202	0.667399
+pH fractionation/SP	High	P15311		Ezrin OS=Homo sapiens OX=9606 GN=EZR PE=1 SV=4	ENSG00000092820	EZR	0	4.94156	5.02508	0.163872	0.22143	0.627236	0.799318	0.0835236	0.627236	0.797309	2.49648	2.26098	0.503723	0.252226	0.509102	0.83851	-0.235502	0.509102	0.840328
+pH fractionation/SP	High	P15336		Cyclic AMP-dependent transcription factor ATF-2 OS=Homo sapiens OX=9606 GN=ATF2 PE=1 SV=4	ENSG00000115966	ATF2	0	-3.74217	-4.24541	1.30138	2.33339	0.760593	0.877229	-0.503249	0.760593	0.874836	0.486825	-1.00862	0.510456	1.68777	0.215771	0.661633	-1.49545	0.215771	0.66204
+pH fractionation/SP	High	P15374		Ubiquitin carboxyl-terminal hydrolase isozyme L3 OS=Homo sapiens OX=9606 GN=UCHL3 PE=1 SV=1	ENSG00000118939	UCHL3	0	1.67781	1.58471	0.364641	0.523638	0.81296	0.905398	-0.0930927	0.81296	0.903594	-0.730752	0.00729039	0.85707	0.298633	0.231771	0.667758	0.738043	0.231771	0.667399
+pH fractionation/SP	High	P15428		15-hydroxyprostaglandin dehydrogenase [NAD(+)] OS=Homo sapiens OX=9606 GN=HPGD PE=1 SV=1	ENSG00000164120	HPGD	0	-2.38691	1.00609	0.0542305	0.851592	0.00232978	0.0736639	3.39299	0.00232978	0.0750657	-1.92713	-1.94809	1.15464	0.461859	0.978105	0.99425	-0.020964	0.978105	0.994594
+pH fractionation/SP	High	P15498		Proto-oncogene vav OS=Homo sapiens OX=9606 GN=VAV1 PE=1 SV=4	ENSG00000141968	VAV1	0	2.51077	3.28654	0.172902	0.0423827	0.00165074	0.0617868	0.775768	0.00165074	0.0624722	1.53994	1.785	0.793928	0.462123	0.668051	0.900458	0.245064	0.668051	0.905278
+pH fractionation/SP	High	P15529-2		Isoform B of Membrane cofactor protein OS=Homo sapiens OX=9606 GN=CD46	ENSG00000117335	CD46	0.002	-2.01786	-3.02226	0.632415	1.02463	0.222019	0.483578	-1.0044	0.222019	0.486613	-5.4915	-5.94948	N.D.	N.D.	N.D.	NA	0.0510046	0.926046	0.980013
+pH fractionation/SP	High	P15531-2		Isoform 2 of Nucleoside diphosphate kinase A OS=Homo sapiens OX=9606 GN=NME1	ENSG00000239672	NME1	0	3.96012	1.70142	0.789061	2.49967	0.209855	0.473615	-2.2587	0.209855	0.475703	-1.38606	-2.87248	1.36102	4.26477	0.596023	0.875679	-1.48642	0.596023	0.877904
+pH fractionation/SP	High	P15586		N-acetylglucosamine-6-sulfatase OS=Homo sapiens OX=9606 GN=GNS PE=1 SV=3	ENSG00000135677	GNS	0	0.77228	2.46116	0.481912	0.735804	0.0292215	0.186143	1.68888	0.0292215	0.192555	0.266843	-0.0643973	1.44362	1.07671	0.765992	0.932268	-0.33124	0.765992	0.937453
+pH fractionation/SP	High	P15735		Phosphorylase b kinase gamma catalytic chain, liver/testis isoform OS=Homo sapiens OX=9606 GN=PHKG2 PE=1 SV=1	ENSG00000156873	PHKG2	0.002	-2.84739	-2.83162	0.301223	0.172135	0.941003	0.973828	0.0157769	0.941003	0.973694	-5.30138	-5.1277	0.749259	1.0478	0.855372	0.959638	0.62065	0.48725	0.833905
+pH fractionation/SP	High	P15812		T-cell surface glycoprotein CD1e, membrane-associated OS=Homo sapiens OX=9606 GN=CD1E PE=1 SV=2	ENSG00000158488	CD1E	0.002	-3.26659	-3.61638	0.869067	2.06006	0.800007	0.899165	-1.18392	0.409483	0.647756	-5.50938	-5.54368	1.21164	0.865369	0.976967	0.99425	0.108717	0.896178	0.97101
+pH fractionation/SP	High	P15880		40S ribosomal protein S2 OS=Homo sapiens OX=9606 GN=RPS2 PE=1 SV=2	ENSG00000140988	RPS2	0	6.01319	5.8461	0.432126	0.341142	0.626909	0.799318	-0.167092	0.626909	0.797309	7.03457	6.51871	0.362123	0.394521	0.170549	0.612817	-0.515858	0.170549	0.612534
+pH fractionation/SP	High	P15884-3		Isoform SEF2-1D of Transcription factor 4 OS=Homo sapiens OX=9606 GN=TCF4	ENSG00000196628	TCF4	0.001		-4.72265	N.D.	N.D.	N.D.	NA	0.570989	0.32149	0.578555	-3.06384	-3.06383	0.858616	0.0625424	0.999992	0.999992	-1.09778	0.413747	0.802888
+pH fractionation/SP	High	P15918		V(D)J recombination-activating protein 1 OS=Homo sapiens OX=9606 GN=RAG1 PE=1 SV=2	ENSG00000166349	RAG1	0	-3.55431	-3.9553	0.361253	1.09345	0.57319	0.766699	-1.10699	0.267902	0.531549	-2.45742	-6.14542	2.18263	2.18907	0.107668	0.520432	-3.688	0.107668	0.526654
+pH fractionation/SP	High	P15924		Desmoplakin OS=Homo sapiens OX=9606 GN=DSP PE=1 SV=3	ENSG00000096696	DSP	0	0.156138	0.4903	0.645776	1.28862	0.708544	0.845698	0.334162	0.708544	0.842679	2.1994	2.58199	0.438046	0.506794	0.378544	0.77544	0.382589	0.378544	0.779174
+pH fractionation/SP	High	P15927-3		Isoform 3 of Replication protein A 32 kDa subunit OS=Homo sapiens OX=9606 GN=RPA2	ENSG00000117748	RPA2	0	2.91936	2.65258	0.718727	0.293346	0.583721	0.771764	-0.266782	0.583721	0.768939	1.66659	1.93736	0.210792	0.505914	0.440388	0.810663	0.270772	0.440388	0.815188
+pH fractionation/SP	High	P16083		Ribosyldihydronicotinamide dehydrogenase [quinone] OS=Homo sapiens OX=9606 GN=NQO2 PE=1 SV=5	ENSG00000124588	NQO2	0	-0.140745	-1.2389	0.21185	0.973095	0.12876	0.371218	-1.09815	0.12876	0.376771	-3.24478	-3.76867	0.278157	0.430181	0.151203	0.579772	-0.523897	0.151203	0.57977
+pH fractionation/SP	High	P16104		Histone H2AX OS=Homo sapiens OX=9606 GN=H2AFX PE=1 SV=2	ENSG00000188486	H2AFX	0	0.450464	0.13213	0.212611	1.19223	0.67252	0.82405	-0.318334	0.67252	0.821879	1.29434	1.62165	0.560787	0.903651	0.622229	0.882872	0.327313	0.622229	0.887377
+pH fractionation/SP	High	P16150		Leukosialin OS=Homo sapiens OX=9606 GN=SPN PE=1 SV=1	ENSG00000197471	SPN; LOC101929889; LOC105369261	0	1.63895	2.25092	0.429977	0.17083	0.0837677	0.298453	0.611969	0.0837677	0.307869	-0.739952	-0.829878	1.40687	0.359532	0.919744	0.979257	-0.0899263	0.919744	0.978777
+pH fractionation/SP	High	P16219		Short-chain specific acyl-CoA dehydrogenase, mitochondrial OS=Homo sapiens OX=9606 GN=ACADS PE=1 SV=1	ENSG00000122971	ACADS	0	0.404706	0.856333	0.382486	0.225212	0.152799	0.405165	0.451627	0.152799	0.410047	-0.820559	-0.227258	0.420833	0.0876685	0.0751213	0.467839	0.593301	0.0751213	0.475706
+pH fractionation/SP	High	P16220		Cyclic AMP-responsive element-binding protein 1 OS=Homo sapiens OX=9606 GN=CREB1 PE=1 SV=2	ENSG00000118260	CREB1	0	-2.24007	-1.74427	1.26899	1.02635	0.626596	0.799318	0.495803	0.626596	0.797309	2.56369	2.87668	0.119843	0.345149	0.212031	0.657451	0.312988	0.212031	0.656334
+pH fractionation/SP	High	P16278		Beta-galactosidase OS=Homo sapiens OX=9606 GN=GLB1 PE=1 SV=2		GLB1	0	-0.924094	0.490645	0.0823273	0.803155	0.0385883	0.210201	1.41474	0.0385883	0.21864	2.4769	0.030267	0.15723	0.302805	0.000241595	0.0523944	-2.44663	0.000241595	0.0488644
+pH fractionation/SP	High	P16284		Platelet endothelial cell adhesion molecule OS=Homo sapiens OX=9606 GN=PECAM1 PE=1 SV=2		PECAM1	0	-3.28175	-0.295048	0.24392	1.72933	0.0414687	0.213804	2.9867	0.0414687	0.222524	-2.30707	-1.4829	1.25822	0.0620604	0.44445	0.813824	-0.835943	0.668574	0.905278
+pH fractionation/SP	High	P16298-4		Isoform 4 of Serine/threonine-protein phosphatase 2B catalytic subunit beta isoform OS=Homo sapiens OX=9606 GN=PPP3CB	ENSG00000107758	PPP3CB	0	-1.3031	-1.01586	0.0627399	0.280237	0.158234	0.409901	0.287236	0.158234	0.414862	-3.18615	-3.10962	0.616501	1.32509	0.945952	0.9853	1.28792	0.425975	0.810874
+pH fractionation/SP	High	P16333		Cytoplasmic protein NCK1 OS=Homo sapiens OX=9606 GN=NCK1 PE=1 SV=1	ENSG00000158092	NCK1	0	0.388825	0.213736	1.02975	0.471419	0.802112	0.899815	-0.17509	0.802112	0.897595	-1.38281	-1.21785	0.725371	0.643919	0.782981	0.936383	0.164956	0.782981	0.940755
+pH fractionation/SP	High	P16383		GC-rich sequence DNA-binding factor 2 OS=Homo sapiens OX=9606 GN=GCFC2 PE=1 SV=2	ENSG00000005436	GCFC2	0.001	-1.75819	-2.51233	0.957563	0.77138	0.347981	0.605766	-0.754145	0.347981	0.601354	-3.35213	-2.80103	0.892719	0.562627	0.416846	0.79687	0.551098	0.416846	0.804636
+pH fractionation/SP	High	P16401		Histone H1.5 OS=Homo sapiens OX=9606 GN=HIST1H1B PE=1 SV=3	ENSG00000184357	HIST1H1B	0	3.27368	2.95445	0.166153	0.359343	0.235031	0.495856	-0.319232	0.235031	0.498578	10.0152	9.79485	0.42606	0.191792	0.459971	0.821769	-0.2203	0.459971	0.825802
+pH fractionation/SP	High	P16402		Histone H1.3 OS=Homo sapiens OX=9606 GN=HIST1H1D PE=1 SV=2	ENSG00000124575	HIST1H1D	0	-0.280569	-2.61576	1.77664	1.68899	0.174293	0.433343	-2.33519	0.174293	0.437698	0.897011	2.57012	4.72223	2.30284	0.610599	0.878657	1.67311	0.610599	0.881651
+pH fractionation/SP	High	P16403		Histone H1.2 OS=Homo sapiens OX=9606 GN=HIST1H1C PE=1 SV=2	ENSG00000187837	HIST1H1C	0	4.19078	4.10589	0.14054	0.435299	0.763989	0.87943	-0.0848842	0.763989	0.876957	10.6618	10.4403	0.835457	0.457599	0.70773	0.912781	-0.221498	0.70773	0.919263
+pH fractionation/SP	High	P16435		NADPH--cytochrome P450 reductase OS=Homo sapiens OX=9606 GN=POR PE=1 SV=2		POR	0	1.04547	1.51927	0.302489	0.296385	0.124685	0.364612	0.473808	0.124685	0.370004	0.137591	0.691858	0.953626	0.59892	0.441966	0.81228	0.554268	0.441966	0.816807
+pH fractionation/SP	High	P16455		Methylated-DNA--protein-cysteine methyltransferase OS=Homo sapiens OX=9606 GN=MGMT PE=1 SV=1		MGMT	0	0.288611	-1.03427	0.359767	0.709521	0.0450016	0.220985	-1.32288	0.0450016	0.229925	-1.24225	-1.38208	0.650063	0.130572	0.733408	0.921826	-0.139827	0.733408	0.928386
+pH fractionation/SP	High	P16591		Tyrosine-protein kinase Fer OS=Homo sapiens OX=9606 GN=FER PE=1 SV=2	ENSG00000151422	FER	0	-1.10928	-0.456682	0.323101	0.615526	0.179285	0.438818	0.652594	0.179285	0.443167	-1.10075	-1.62387	1.97878	0.757235	0.69092	0.910002	-0.523128	0.69092	0.916041
+pH fractionation/SP	High	P16615		Sarcoplasmic/endoplasmic reticulum calcium ATPase 2 OS=Homo sapiens OX=9606 GN=ATP2A2 PE=1 SV=1	ENSG00000174437	ATP2A2	0	4.97513	4.32211	0.191691	0.434078	0.0756921	0.283315	-0.653022	0.0756921	0.294435	2.8702	3.63429	0.266198	0.104002	0.00980146	0.236571	0.764092	0.00980146	0.244292
+pH fractionation/SP	High	P16885		1-phosphatidylinositol 4,5-bisphosphate phosphodiesterase gamma-2 OS=Homo sapiens OX=9606 GN=PLCG2 PE=1 SV=4	ENSG00000197943	PLCG2	0	-1.30689	-1.86891	0.266844	0.144521	0.0326593	0.196849	-0.562016	0.0326593	0.203713	-3.59658	-3.24238	0.381905	0.388127	0.386695	0.777525	-0.735314	0.548299	0.85761
+pH fractionation/SP	High	P16930		Fumarylacetoacetase OS=Homo sapiens OX=9606 GN=FAH PE=1 SV=2	ENSG00000103876	FAH	0	2.32497	2.07006	0.171689	0.0852224	0.0826261	0.29686	-0.254909	0.0826261	0.306425	-1.06107	-0.779255	1.04313	0.811609	0.730614	0.921746	0.281813	0.730614	0.926698
+pH fractionation/SP	High	P16930-2		Isoform 2 of Fumarylacetoacetase OS=Homo sapiens OX=9606 GN=FAH	ENSG00000103876	FAH	0	-4.24728	-3.44913	1.37793	0.557835	0.405031	0.649293	0.798158	0.405031	0.643802			N.D.	N.D.	N.D.	NA	0.213562	0.135362	0.559897
+pH fractionation/SP	High	P16949		Stathmin OS=Homo sapiens OX=9606 GN=STMN1 PE=1 SV=3	ENSG00000117632	STMN1	0	4.8495	3.62597	0.358365	1.29357	0.189522	0.44825	-1.22354	0.189522	0.452012	1.61333	0.997675	1.26563	1.84352	0.65834	0.896037	-0.615656	0.65834	0.901993
+pH fractionation/SP	High	P16989		Y-box-binding protein 3 OS=Homo sapiens OX=9606 GN=YBX3 PE=1 SV=4	ENSG00000060138	CSDA; YBX3	0	1.65118	-0.343637	0.78126	2.03946	0.188804	0.448229	-1.99482	0.188804	0.452012	1.37176	0.573195	1.08917	1.47934	0.493383	0.836256	-0.798563	0.493383	0.836622
+pH fractionation/SP	High	P16989-2		Isoform 2 of Y-box-binding protein 3 OS=Homo sapiens OX=9606 GN=YBX3	ENSG00000060138	CSDA; YBX3	0		-3.53829	N.D.	N.D.	N.D.	NA	1.03222	0.287528	0.549014	-2.45105	-3.07179	1.47182	N.D.	N.D.	NA	-2.82351	0.112251	0.532958
+pH fractionation/SP	High	P17010-3		Isoform 3 of Zinc finger X-chromosomal protein OS=Homo sapiens OX=9606 GN=ZFX	ENSG00000005889	ZFX	0	-2.88486	-2.04131	0.703216	0.12867	0.110468	0.344735	0.843556	0.110468	0.351589	-0.245874	-0.43153	1.32978	1.51575	0.881023	0.968312	-0.185656	0.881023	0.968558
+pH fractionation/SP	High	P17025		Zinc finger protein 182 OS=Homo sapiens OX=9606 GN=ZNF182 PE=2 SV=2	ENSG00000147118	ZNF182	0.001	-5.99896	-4.94257	N.D.	N.D.	N.D.	NA	0.470728	0.326276	0.582408	-3.5902	-2.23463	2.95301	0.865259	0.487974	0.832943	1.35557	0.487974	0.834131
+pH fractionation/SP	High	P17026		Zinc finger protein 22 OS=Homo sapiens OX=9606 GN=ZNF22 PE=1 SV=3	ENSG00000165512	ZNF22	0	0.00348605	-1.31616	0.695698	1.80429	0.302677	0.563084	-1.31964	0.302677	0.560802	3.35589	3.21479	0.499824	0.640555	0.778558	0.936383	-0.1411	0.778558	0.940755
+pH fractionation/SP	High	P17028		Zinc finger protein 24 OS=Homo sapiens OX=9606 GN=ZNF24 PE=1 SV=4	ENSG00000172466	ZNF24	0	-1.71517	-1.56019	0.708212	0.865518	0.822098	0.910579	0.154989	0.822098	0.908653	1.2919	1.35636	0.332702	0.45009	0.851634	0.958031	0.0644541	0.851634	0.96015
+pH fractionation/SP	High	P17029		Zinc finger protein with KRAB and SCAN domains 1 OS=Homo sapiens OX=9606 GN=ZKSCAN1 PE=1 SV=3	ENSG00000106261	ZKSCAN1	0.001	-2.4868	-3.68039	0.222277	1.27001	0.184099	0.444794	-1.19358	0.184099	0.449097	-2.01846	-2.12347	1.10237	1.06881	0.911414	0.975231	-0.105013	0.911414	0.97481
+pH fractionation/SP	High	P17036		Zinc finger protein 3 OS=Homo sapiens OX=9606 GN=ZNF3 PE=1 SV=3	ENSG00000166526	ZNF3	0.005	-7.78745	-6.48892	1.88679	N.D.	N.D.	NA	1.62075	0.215381	0.480783	-4.61435	-5.25248	1.46899	1.14328	0.644831	0.891	-1.02834	0.380288	0.779278
+pH fractionation/SP	High	P17041		Zinc finger protein 32 OS=Homo sapiens OX=9606 GN=ZNF32 PE=1 SV=2	ENSG00000169740	ZNF32	0.002			N.D.	N.D.	N.D.	NA	0.148699	0.206547	0.472595	-2.67048	-2.59425	1.2446	1.41168	0.952921	0.986727	-1.24649	0.482489	0.833616
+pH fractionation/SP	High	P17050		Alpha-N-acetylgalactosaminidase OS=Homo sapiens OX=9606 GN=NAGA PE=1 SV=2	ENSG00000198951	NAGA	0.001	-1.8511	-1.76415	0.599471	0.648275	0.872857	0.93929	0.0869426	0.872857	0.937841	-5.27333	-4.13885	0.0124238	0.25157	0.0237706	0.31388	0.933333	0.391941	0.7889
+pH fractionation/SP	High	P17096		High mobility group protein HMG-I/HMG-Y OS=Homo sapiens OX=9606 GN=HMGA1 PE=1 SV=3	ENSG00000137309	HMGA1	0	-0.105799	-1.19045	0.614575	0.979601	0.179583	0.438986	-1.08465	0.179583	0.443372	5.98538	5.85738	0.418484	0.033221	0.625338	0.883268	-0.128009	0.625338	0.888314
+pH fractionation/SP	High	P17096-2		Isoform HMG-Y of High mobility group protein HMG-I/HMG-Y OS=Homo sapiens OX=9606 GN=HMGA1	ENSG00000137309	HMGA1	0	-5.17768	-7.14121	N.D.	N.D.	N.D.	NA	-0.574859	0.311896	0.569032	1.6407	0.438945	1.33874	2.57212	0.512544	0.839378	-1.20176	0.512544	0.840354
+pH fractionation/SP	High	P17152		Transmembrane protein 11, mitochondrial OS=Homo sapiens OX=9606 GN=TMEM11 PE=1 SV=1	ENSG00000178307	TMEM11	0.004	-2.0784	-2.9854	0.237023	0.937767	0.179668	0.438986	-0.906999	0.179668	0.443372	-3.76517	-3.74982	0.598826	1.2949	0.986164	0.995395	-0.871938	0.468238	0.828003
+pH fractionation/SP	High	P17174		Aspartate aminotransferase, cytoplasmic OS=Homo sapiens OX=9606 GN=GOT1 PE=1 SV=3	ENSG00000120053	GOT1	0	2.74016	3.7212	0.285987	0.377695	0.0230297	0.170278	0.981038	0.0230297	0.175829	1.80728	1.15722	0.683595	0.886442	0.371405	0.770983	-0.650061	0.371405	0.774092
+pH fractionation/SP	High	P17252		Protein kinase C alpha type OS=Homo sapiens OX=9606 GN=PRKCA PE=1 SV=4	ENSG00000154229	PRKCA	0	3.14481	0.996059	0.264897	0.651387	0.0061174	0.100353	-2.14876	0.0061174	0.0992352	1.04813	1.47243	0.25694	0.53352	0.282403	0.70913	0.424295	0.282403	0.706798
+pH fractionation/SP	High	P17480		Nucleolar transcription factor 1 OS=Homo sapiens OX=9606 GN=UBTF PE=1 SV=1	ENSG00000108312	UBTF	0	2.51141	1.92795	0.125276	0.607364	0.17852	0.438186	-0.583465	0.17852	0.442671	5.08833	5.17713	0.178013	0.411967	0.749085	0.924275	0.0887919	0.749085	0.930318
+pH fractionation/SP	High	P17480-2		Isoform UBF2 of Nucleolar transcription factor 1 OS=Homo sapiens OX=9606 GN=UBTF	ENSG00000108312	UBTF	0	-2.5898	-3.23117	0.545047	1.19035	0.443939	0.677969	-0.641374	0.443939	0.674465	-0.243138	0.397706	1.0514	1.12363	0.510624	0.838892	0.640844	0.510624	0.840354
+pH fractionation/SP	High	P17544		Cyclic AMP-dependent transcription factor ATF-7 OS=Homo sapiens OX=9606 GN=ATF7 PE=1 SV=2	ENSG00000170653	ATF7	0.001	-4.97295	-2.52449	N.D.	1.42384	N.D.	NA	3.19565	0.0253029	0.180713	-2.08138	-3.06379	0.232758	0.652401	0.0699527	0.462257	-0.982407	0.0699527	0.469081
+pH fractionation/SP	High	P17612		cAMP-dependent protein kinase catalytic subunit alpha OS=Homo sapiens OX=9606 GN=PRKACA PE=1 SV=2	ENSG00000072062	PRKACA	0	3.03073	3.14313	0.104749	0.123649	0.295873	0.557383	0.112403	0.295873	0.556632	1.6257	1.4783	0.0984307	0.796189	0.766234	0.932318	-0.147397	0.766234	0.937524
+pH fractionation/SP	High	P17706		Tyrosine-protein phosphatase non-receptor type 2 OS=Homo sapiens OX=9606 GN=PTPN2 PE=1 SV=2	ENSG00000175354	PTPN2	0	-1.81892	-2.00169	0.580558	0.430143	0.683924	0.828894	-0.182764	0.683924	0.826368	-2.2618	-2.73057	0.0791141	1.38888	0.590784	0.871503	-0.468768	0.590784	0.873267
+pH fractionation/SP	High	P17812		CTP synthase 1 OS=Homo sapiens OX=9606 GN=CTPS1 PE=1 SV=2	ENSG00000171793	CTPS1	0	4.3736	3.70497	0.206631	0.148873	0.0104383	0.122357	-0.668634	0.0104383	0.12209	2.10484	2.5104	0.483101	0.193847	0.248516	0.687922	0.405553	0.248516	0.686039
+pH fractionation/SP	High	P17844		Probable ATP-dependent RNA helicase DDX5 OS=Homo sapiens OX=9606 GN=DDX5 PE=1 SV=1	ENSG00000108654	DDX5	0	5.97105	5.70776	0.236416	0.412513	0.391803	0.64157	-0.263289	0.391803	0.635193	8.91117	8.44228	0.22638	0.144978	0.0391237	0.387609	-0.468881	0.0391237	0.398028
+pH fractionation/SP	High	P17858		ATP-dependent 6-phosphofructokinase, liver type OS=Homo sapiens OX=9606 GN=PFKL PE=1 SV=6	ENSG00000141959	PFKL	0	2.66174	2.68538	0.019113	0.25158	0.878974	0.942936	0.0236349	0.878974	0.941063	0.587935	1.05374	0.748364	0.289012	0.371463	0.770983	0.465806	0.371463	0.774092
+pH fractionation/SP	High	P17900		Ganglioside GM2 activator OS=Homo sapiens OX=9606 GN=GM2A PE=1 SV=4	ENSG00000196743	GM2A	0.002	-1.46137	-2.14405	0.606285	0.695906	0.269381	0.532935	-0.682679	0.269381	0.532604	-5.12928	-3.52577	1.64142	0.883713	0.210512	0.655829	1.6035	0.210512	0.654071
+pH fractionation/SP	High	P17980		26S proteasome regulatory subunit 6A OS=Homo sapiens OX=9606 GN=PSMC3 PE=1 SV=3	ENSG00000165916	PSMC3	0	3.77454	3.8252	0.19753	0.225877	0.784515	0.892252	0.0506573	0.784515	0.889662	1.80495	2.27608	0.458177	0.0993737	0.156737	0.588258	0.471132	0.156737	0.587967
+pH fractionation/SP	High	P17987		T-complex protein 1 subunit alpha OS=Homo sapiens OX=9606 GN=TCP1 PE=1 SV=1	ENSG00000120438	TCP1	0	6.78151	6.49943	0.080325	0.0758784	0.0114959	0.128189	-0.282084	0.0114959	0.128309	5.10523	6.00595	0.747876	0.806897	0.229161	0.667758	0.900724	0.229161	0.667399
+pH fractionation/SP	High	P18031		Tyrosine-protein phosphatase non-receptor type 1 OS=Homo sapiens OX=9606 GN=PTPN1 PE=1 SV=1	ENSG00000196396	PTPN1	0	2.09284	2.75651	0.0398369	0.220865	0.00687691	0.105644	0.663669	0.00687691	0.104592	0.715328	1.51018	0.50619	0.255385	0.072119	0.466101	0.79485	0.072119	0.472474
+pH fractionation/SP	High	P18074		General transcription and DNA repair factor IIH helicase subunit XPD OS=Homo sapiens OX=9606 GN=ERCC2 PE=1 SV=1	ENSG00000104884	ERCC2	0	2.24891	0.890002	1.98054	2.02022	0.452217	0.68409	-1.3589	0.452217	0.679785	0.300958	0.382767	0.251285	0.39967	0.779019	0.936383	0.0818098	0.779019	0.940755
+pH fractionation/SP	High	P18077		60S ribosomal protein L35a OS=Homo sapiens OX=9606 GN=RPL35A PE=1 SV=2	ENSG00000182899	RPL35A	0	4.52027	4.14625	0.0740334	0.602213	0.345815	0.604428	-0.374017	0.345815	0.600019	6.28041	5.37597	0.0917856	0.477421	0.0322124	0.354795	-0.904436	0.0322124	0.367537
+pH fractionation/SP	High	P18085		ADP-ribosylation factor 4 OS=Homo sapiens OX=9606 GN=ARF4 PE=1 SV=3	ENSG00000168374	ARF4	0	3.35773	3.67994	0.0908144	0.239988	0.0952807	0.319999	0.32221	0.0952807	0.329146	4.85245	4.17196	0.562486	1.13251	0.404051	0.789619	-0.68049	0.404051	0.797363
+pH fractionation/SP	High	P18124		60S ribosomal protein L7 OS=Homo sapiens OX=9606 GN=RPL7 PE=1 SV=1	ENSG00000147604	RPL7	0	5.7713	5.52172	0.389097	0.303984	0.430723	0.669079	-0.249585	0.430723	0.664567	7.3129	6.67142	0.309677	0.343939	0.0742996	0.467839	-0.641478	0.0742996	0.475706
+pH fractionation/SP	High	P18206		Vinculin OS=Homo sapiens OX=9606 GN=VCL PE=1 SV=4	ENSG00000035403	VCL	0	0.833084	1.54678	0.173417	0.374544	0.0401406	0.211068	0.713694	0.0401406	0.220172	-0.520021	-0.489016	0.934234	0.722481	0.965911	0.990349	0.0310049	0.965911	0.989845
+pH fractionation/SP	High	P18433		Receptor-type tyrosine-protein phosphatase alpha OS=Homo sapiens OX=9606 GN=PTPRA PE=1 SV=3		PTPRA	0.001	-3.02972	-2.29559	0.843901	1.03004	0.393699	0.643537	0.734131	0.393699	0.637233	-3.46725	-5.20129	0.918407	3.97544	0.502498	0.83679	-1.73404	0.502498	0.83835
+pH fractionation/SP	High	P18440		Arylamine N-acetyltransferase 1 OS=Homo sapiens OX=9606 GN=NAT1 PE=1 SV=2	ENSG00000171428	NAT1	0.001	-3.3102	-1.4248	0.906888	0.855532	0.058843	0.25002	1.88539	0.058843	0.260527	-1.43555	-3.6551	1.33069	2.62881	0.261975	0.698601	-2.21955	0.261975	0.694309
+pH fractionation/SP	High	P18583-3		Isoform B of Protein SON OS=Homo sapiens OX=9606 GN=SON	ENSG00000159140	SON	0	-5.94095		0.0554521	N.D.	N.D.	NA	-0.0248184	0.772063	0.881007	-2.05191	-1.74233	1.21439	0.879197	0.738679	0.922208	0.309577	0.738679	0.928879
+pH fractionation/SP	High	P18583-5		Isoform D of Protein SON OS=Homo sapiens OX=9606 GN=SON		SON	0	3.82024	2.22256	1.329	1.34378	0.216993	0.479443	-1.59768	0.216993	0.482884	5.6364	5.41897	0.623176	0.475129	0.655918	0.893525	-0.217432	0.655918	0.900069
+pH fractionation/SP	High	P18615		Negative elongation factor E OS=Homo sapiens OX=9606 GN=NELFE PE=1 SV=3	ENSG00000204356	NELFE; RDBP	0	0.126464	-1.29876	0.359653	0.7519	0.0414832	0.213804	-1.42523	0.0414832	0.222524	-0.740507	-1.45022	0.704801	1.09281	0.398027	0.784576	-0.709715	0.398027	0.791881
+pH fractionation/SP	High	P18621-3		Isoform 3 of 60S ribosomal protein L17 OS=Homo sapiens OX=9606 GN=RPL17	ENSG00000215472	RPL17-C18ORF32; RPL17	0	4.26916	3.44364	0.622126	0.507521	0.149531	0.400805	-0.825517	0.149531	0.405744	5.83296	4.83054	0.556513	0.751413	0.1369	0.560134	-1.00242	0.1369	0.560623
+pH fractionation/SP	High	P18669		Phosphoglycerate mutase 1 OS=Homo sapiens OX=9606 GN=PGAM1 PE=1 SV=2	ENSG00000171314	PGAM1; LOC643576	0	6.09109	5.9231	0.16974	0.114909	0.228758	0.490725	-0.167993	0.228758	0.49365	2.13237	2.30469	0.390282	0.0426699	0.489466	0.833723	0.172321	0.489466	0.834524
+pH fractionation/SP	High	P18754-2		Isoform 2 of Regulator of chromosome condensation OS=Homo sapiens OX=9606 GN=RCC1	ENSG00000180198	RCC1	0	2.78677	1.95575	0.343503	0.117484	0.0166108	0.147226	-0.831021	0.0166108	0.151372	5.30901	4.85682	0.350065	0.0431767	0.0905613	0.487804	-0.452187	0.0905613	0.494139
+pH fractionation/SP	High	P18846		Cyclic AMP-dependent transcription factor ATF-1 OS=Homo sapiens OX=9606 GN=ATF1 PE=1 SV=2	ENSG00000123268	ATF1	0.002	-6.01556		N.D.	N.D.	N.D.	NA	0.134463	0.33519	0.590095	-3.28244	-3.32684	0.385457	0.571972	0.935769	0.983663	-0.0289169	0.985501	0.996319
+pH fractionation/SP	High	P18858		DNA ligase 1 OS=Homo sapiens OX=9606 GN=LIG1 PE=1 SV=1	ENSG00000105486	LIG1	0	2.87246	1.3049	0.0816905	0.0894214	2.34481e-05	0.0135168	-1.56756	2.34481e-05	0.0144083	1.39894	1.1434	0.140522	0.744597	0.590501	0.871503	-0.255537	0.590501	0.873267
+pH fractionation/SP	High	P18887		DNA repair protein XRCC1 OS=Homo sapiens OX=9606 GN=XRCC1 PE=1 SV=2		XRCC1	0	1.17141	1.12825	0.0198323	0.0260146	0.0842902	0.298966	-0.0431614	0.0842902	0.308663	2.63009	2.58173	0.11003	0.0454322	0.520455	0.842042	-0.0483601	0.520455	0.843109
+pH fractionation/SP	High	P19013		Keratin, type II cytoskeletal 4 OS=Homo sapiens OX=9606 GN=KRT4 PE=1 SV=4		KRT4	0	-2.77371	-2.82434	2.1874	0.219959	0.970092	0.987026	-0.0506317	0.970092	0.986554	-3.45873	-1.88646	1.42132	0.63549	0.174167	0.618147	2.70035	0.110334	0.530243
+pH fractionation/SP	High	P19174-2		Isoform 2 of 1-phosphatidylinositol 4,5-bisphosphate phosphodiesterase gamma-1 OS=Homo sapiens OX=9606 GN=PLCG1	ENSG00000124181	PLCG1	0	4.04722	4.07106	0.440112	0.0826423	0.930963	0.968653	0.0238407	0.930963	0.96839	3.5797	3.20927	0.475365	0.3405	0.334147	0.743118	-0.370429	0.334147	0.745207
+pH fractionation/SP	High	P19256		Lymphocyte function-associated antigen 3 OS=Homo sapiens OX=9606 GN=CD58 PE=1 SV=1	ENSG00000116815	CD58	0.006	1.76021	-3.28441	0.979098	4.87184	0.153517	0.405165	-5.04462	0.153517	0.410047	-3.03071	-2.5879	1.24161	0.29679	0.669268	0.900458	-0.843827	0.598554	0.879045
+pH fractionation/SP	High	P19338		Nucleolin OS=Homo sapiens OX=9606 GN=NCL PE=1 SV=3	ENSG00000115053	NCL	0	7.67063	6.85576	0.283205	0.374226	0.0396528	0.210576	-0.814864	0.0396528	0.219612	9.54449	8.59157	0.50491	0.395447	0.0617481	0.452851	-0.952915	0.0617481	0.460902
+pH fractionation/SP	High	P19367-3		Isoform 3 of Hexokinase-1 OS=Homo sapiens OX=9606 GN=HK1	ENSG00000156515	HK1	0	3.87016	4.09286	0.180186	0.174264	0.198689	0.458867	0.222698	0.198689	0.461683	1.86186	1.99927	0.300583	0.352189	0.634341	0.887018	0.137406	0.634341	0.892127
+pH fractionation/SP	High	P19387		DNA-directed RNA polymerase II subunit RPB3 OS=Homo sapiens OX=9606 GN=POLR2C PE=1 SV=2	ENSG00000102978	POLR2C	0	-0.293712	-0.378963	0.441277	0.663873	0.862059	0.933553	-0.0852511	0.862059	0.93212	1.60849	1.26917	0.473184	0.662064	0.510135	0.83851	-0.339315	0.510135	0.840328
+pH fractionation/SP	High	P19388		DNA-directed RNA polymerases I, II, and III subunit RPABC1 OS=Homo sapiens OX=9606 GN=POLR2E PE=1 SV=4	ENSG00000099817	POLR2E	0	0.507466	0.116615	0.123526	1.31904	0.636266	0.803652	-0.390851	0.636266	0.801473	2.37541	1.93262	0.437956	0.528504	0.326425	0.742283	-0.442786	0.326425	0.743982
+pH fractionation/SP	High	P19397		Leukocyte surface antigen CD53 OS=Homo sapiens OX=9606 GN=CD53 PE=1 SV=1	ENSG00000143119	CD53	0.004	0.190111	1.14208	0.364734	1.25337	0.27515	0.537702	0.951968	0.27515	0.536732	-2.84981	-1.85466	0.534899	0.715811	0.125974	0.544743	0.99515	0.125974	0.54796
+pH fractionation/SP	High	P19404		NADH dehydrogenase [ubiquinone] flavoprotein 2, mitochondrial OS=Homo sapiens OX=9606 GN=NDUFV2 PE=1 SV=2	ENSG00000178127	NDUFV2	0	-0.0065143	-0.0397794	0.270228	0.823961	0.950212	0.978342	-0.0332651	0.950212	0.977226	-0.119507	0.00814626	0.519754	0.554668	0.785607	0.937003	0.127653	0.785607	0.941002
+pH fractionation/SP	High	P19447		General transcription and DNA repair factor IIH helicase subunit XPB OS=Homo sapiens OX=9606 GN=ERCC3 PE=1 SV=1	ENSG00000163161	ERCC3	0	-0.203305	-0.725149	0.262986	0.210612	0.0550757	0.240631	-0.521845	0.0550757	0.251025	1.64078	1.2688	0.267592	0.56045	0.358146	0.760814	-0.371975	0.358146	0.762902
+pH fractionation/SP	High	P19474		E3 ubiquitin-protein ligase TRIM21 OS=Homo sapiens OX=9606 GN=TRIM21 PE=1 SV=1	ENSG00000132109	TRIM21	0	-0.136874	1.27479	0.15855	0.259673	0.00130121	0.0584969	1.41167	0.00130121	0.0580176	-1.0944	-0.274741	0.191689	0.263675	0.0121093	0.249391	0.819661	0.0121093	0.259106
+pH fractionation/SP	High	P19525		Interferon-induced, double-stranded RNA-activated protein kinase OS=Homo sapiens OX=9606 GN=EIF2AK2 PE=1 SV=2	ENSG00000055332	EIF2AK2	0	1.12409	1.11393	0.0979945	0.652168	0.979977	0.991009	-0.0101669	0.979977	0.989975	2.75107	2.0476	0.201536	0.29705	0.0274194	0.33299	-0.703476	0.0274194	0.34491
+pH fractionation/SP	High	P19623		Spermidine synthase OS=Homo sapiens OX=9606 GN=SRM PE=1 SV=1	ENSG00000116649	SRM	0	4.16194	3.39256	0.31488	0.303859	0.038201	0.209671	-0.769379	0.038201	0.218025	1.34137	2.07423	0.287409	0.866685	0.23684	0.674529	0.73286	0.23684	0.67295
+pH fractionation/SP	High	P19784		Casein kinase II subunit alpha' OS=Homo sapiens OX=9606 GN=CSNK2A2 PE=1 SV=1	ENSG00000070770	CSNK2A2	0	0.878025	1.346	0.256757	0.320788	0.1198	0.35717	0.467974	0.1198	0.362727	1.35361	1.17239	0.57236	0.396907	0.67559	0.904418	-0.181221	0.67559	0.909844
+pH fractionation/SP	High	P19793		Retinoic acid receptor RXR-alpha OS=Homo sapiens OX=9606 GN=RXRA PE=1 SV=1	ENSG00000186350	RXRA	0	-2.35589	-1.27065	0.777393	0.844852	0.176925	0.436291	1.08524	0.176925	0.441149	-2.65456	-3.9871	1.86986	1.67515	0.409929	0.792666	-1.33255	0.409929	0.800422
+pH fractionation/SP	High	P19823		Inter-alpha-trypsin inhibitor heavy chain H2 OS=Homo sapiens OX=9606 GN=ITIH2 PE=1 SV=2	ENSG00000151655	ITIH2	0.001	-3.10723	-2.47585	0.417153	0.479245	0.160327	0.412931	0.631384	0.160327	0.417142	-2.32926	-1.14144	0.433767	1.16773	0.278535	0.70875	2.68722	0.179455	0.621358
+pH fractionation/SP	High	P19838-2		Isoform 2 of Nuclear factor NF-kappa-B p105 subunit OS=Homo sapiens OX=9606 GN=NFKB1	ENSG00000109320	NFKB1	0	1.76208	3.26232	0.117887	0.354216	0.00223902	0.0727992	1.50025	0.00223902	0.0740964	0.740927	2.00693	0.294683	0.28264	0.00580615	0.19683	1.26601	0.00580615	0.202765
+pH fractionation/SP	High	P20020		Plasma membrane calcium-transporting ATPase 1 OS=Homo sapiens OX=9606 GN=ATP2B1 PE=1 SV=3		ATP2B1	0	-3.08486	-3.10214	0.745502	0.638214	0.977133	0.990178	-0.0172788	0.977133	0.98917	-3.29749	-3.66162	0.347496	0.869473	0.626285	0.883268	0.718834	0.582047	0.87137
+pH fractionation/SP	High	P20042		Eukaryotic translation initiation factor 2 subunit 2 OS=Homo sapiens OX=9606 GN=EIF2S2 PE=1 SV=2	ENSG00000125977	EIF2S2	0	4.75986	4.19134	0.509109	0.136669	0.135137	0.380473	-0.568523	0.135137	0.385471	4.88074	4.67294	0.494274	0.421018	0.608882	0.877984	-0.207798	0.608882	0.881126
+pH fractionation/SP	High	P20073		Annexin A7 OS=Homo sapiens OX=9606 GN=ANXA7 PE=1 SV=3	ENSG00000138279	ANXA7	0	3.00332	2.69489	0.411858	0.396982	0.403234	0.648142	-0.308426	0.403234	0.642483	0.580811	0.415692	0.627056	0.629923	0.763742	0.93026	-0.165119	0.763742	0.935369
+pH fractionation/SP	High	P20226		TATA-box-binding protein OS=Homo sapiens OX=9606 GN=TBP PE=1 SV=2	ENSG00000112592	TBP	0.001	-1.95839	-2.44689	0.250811	0.556506	0.237976	0.498132	-0.488497	0.237976	0.500678	0.202377	-0.485253	0.215954	0.296288	0.031421	0.34939	-0.687631	0.031421	0.36173
+pH fractionation/SP	High	P20248		Cyclin-A2 OS=Homo sapiens OX=9606 GN=CCNA2 PE=1 SV=2	ENSG00000145386	CCNA2	0.001	-3.40931	-3.91198	2.01528	0.275312	0.690659	0.833788	-0.502665	0.690659	0.83038	-1.40102	-3.9321	0.943365	0.651042	0.0187019	0.285456	-2.53108	0.0187019	0.295506
+pH fractionation/SP	High	P20264		POU domain, class 3, transcription factor 3 OS=Homo sapiens OX=9606 GN=POU3F3 PE=2 SV=2	ENSG00000198914	POU3F3	0.004	-3.14964	-5.04807	N.D.	2.23778	N.D.	NA	0.215334	0.903641	0.956478	-1.64378	-3.11477	0.777004	1.04546	0.122115	0.541592	-1.471	0.122115	0.544942
+pH fractionation/SP	High	P20290		Transcription factor BTF3 OS=Homo sapiens OX=9606 GN=BTF3 PE=1 SV=1	ENSG00000145741	BTF3	0	2.75775	1.86307	0.406527	0.38496	0.050443	0.229956	-0.894682	0.050443	0.239918	2.9315	1.53092	0.521685	0.530926	0.0311067	0.347558	-1.40058	0.0311067	0.359728
+pH fractionation/SP	High	P20290-2		Isoform 2 of Transcription factor BTF3 OS=Homo sapiens OX=9606 GN=BTF3	ENSG00000145741	BTF3	0	-2.21521	-3.24827	0.214117	1.99223	0.537756	0.7433	0.41188	0.834629	0.917087	0.998275	-0.963798	1.90613	3.55001	0.446484	0.814328	-1.96207	0.446484	0.81855
+pH fractionation/SP	High	P20292		Arachidonate 5-lipoxygenase-activating protein OS=Homo sapiens OX=9606 GN=ALOX5AP PE=1 SV=2	ENSG00000132965	ALOX5AP	0.001	1.50986	3.06474	0.578589	0.0316011	0.00967773	0.118927	1.55489	0.00967773	0.117759	4.54975	4.20706	0.17653	0.508072	0.331718	0.74308	-0.342688	0.331718	0.744694
+pH fractionation/SP	High	P20336		Ras-related protein Rab-3A OS=Homo sapiens OX=9606 GN=RAB3A PE=1 SV=1	ENSG00000105649	RAB3A	0	-0.957592	-3.63281	0.0328438	1.32007	0.0246933	0.174211	-2.67522	0.0246933	0.179841	-5.80635	-4.50342	1.16029	0.595817	0.158648	0.592104	1.30293	0.158648	0.592292
+pH fractionation/SP	High	P20338		Ras-related protein Rab-4A OS=Homo sapiens OX=9606 GN=RAB4A PE=1 SV=3	ENSG00000168118	RAB4A	0	2.16548	2.55939	0.651331	0.195026	0.372413	0.624915	0.393904	0.372413	0.619239	-2.38817	0.593739	2.33199	0.592601	0.0983625	0.504903	2.98191	0.0983625	0.508913
+pH fractionation/SP	High	P20339		Ras-related protein Rab-5A OS=Homo sapiens OX=9606 GN=RAB5A PE=1 SV=2	ENSG00000144566	RAB5A	0		-2.2799	N.D.	1.2643	N.D.	NA	3.92168	0.00603134	0.0990338	-5.03596	-6.39626	0.731505	N.D.	N.D.	NA	-0.852486	0.2464	0.684384
+pH fractionation/SP	High	P20340-2		Isoform 2 of Ras-related protein Rab-6A OS=Homo sapiens OX=9606 GN=RAB6A	ENSG00000175582	RAB6A	0	2.07984	2.16386	0.496533	0.175962	0.796045	0.896806	0.0840182	0.796045	0.894918	0.0828302	0.63854	0.587149	0.38791	0.243193	0.681294	0.55571	0.243193	0.680046
+pH fractionation/SP	High	P20618		Proteasome subunit beta type-1 OS=Homo sapiens OX=9606 GN=PSMB1 PE=1 SV=2	ENSG00000008018	PSMB1	0	4.25727	4.62592	0.193634	0.107992	0.0450155	0.220985	0.36865	0.0450155	0.229925	3.0138	2.79879	0.504077	0.563656	0.648173	0.891389	-0.215016	0.648173	0.898144
+pH fractionation/SP	High	P20645		Cation-dependent mannose-6-phosphate receptor OS=Homo sapiens OX=9606 GN=M6PR PE=1 SV=1	ENSG00000003056	M6PR	0	2.48406	3.16533	0.973524	0.416128	0.327493	0.587906	0.681275	0.327493	0.583134	-2.09896	-0.973646	0.927364	0.258393	0.1129	0.527529	1.12531	0.1129	0.534553
+pH fractionation/SP	High	P20671		Histone H2A type 1-D OS=Homo sapiens OX=9606 GN=HIST1H2AD PE=1 SV=2	ENSG00000196866	HIST1H2AD	0	3.84466	5.52925	0.804836	1.40159	0.145337	0.394397	1.6846	0.145337	0.399672	11.5271	11.025	0.128064	0.816656	0.352148	0.754975	-0.502081	0.352148	0.756509
+pH fractionation/SP	High	P20674		Cytochrome c oxidase subunit 5A, mitochondrial OS=Homo sapiens OX=9606 GN=COX5A PE=1 SV=2	ENSG00000178741	COX5A	0.001	1.49837	1.64706	0.154759	0.0860916	0.219554	0.482785	0.148691	0.219554	0.485668	0.554206	-1.02725	1.44614	0.589987	0.154333	0.585582	-1.58146	0.154333	0.584366
+pH fractionation/SP	High	P20700		Lamin-B1 OS=Homo sapiens OX=9606 GN=LMNB1 PE=1 SV=2	ENSG00000113368	LMNB1	0	4.07891	3.13803	0.112867	0.457334	0.0258276	0.176568	-0.940882	0.0258276	0.182252	8.987	9.21498	0.477882	0.558865	0.619743	0.881646	0.227979	0.619743	0.885451
+pH fractionation/SP	High	P20810-6		Isoform 6 of Calpastatin OS=Homo sapiens OX=9606 GN=CAST	ENSG00000153113	CAST	0.005	-4.38154	-3.40355	0.742537	0.62526	0.155922	0.407783	0.977991	0.155922	0.412889			N.D.	N.D.	N.D.	NA	0.343701	0.0534812	0.436281
+pH fractionation/SP	High	P20839-6		Isoform 6 of Inosine-5'-monophosphate dehydrogenase 1 OS=Homo sapiens OX=9606 GN=IMPDH1	ENSG00000106348	IMPDH1	0	1.19605	0.131033	0.296359	0.358585	0.0166039	0.147226	-1.06502	0.0166039	0.151372	-1.27841	-0.575072	0.309781	0.396005	0.0725287	0.466101	0.703339	0.0725287	0.472649
+pH fractionation/SP	High	P20930		Filaggrin OS=Homo sapiens OX=9606 GN=FLG PE=1 SV=3	ENSG00000143631	FLG	0.002	-2.00433	-4.19002	0.629244	0.778602	0.0392752	0.210225	-2.79465	0.0228322	0.175517	-4.17846	-3.09989	N.D.	0.577426	N.D.	NA	2.69896	0.0371635	0.388099
+pH fractionation/SP	High	P20936		Ras GTPase-activating protein 1 OS=Homo sapiens OX=9606 GN=RASA1 PE=1 SV=1	ENSG00000145715	RASA1	0	-0.260785	2.28085	0.409479	0.342715	0.00118057	0.0584969	2.54163	0.00118057	0.0580176	0.386076	0.0164946	1.96133	1.14204	0.791899	0.939713	-0.369582	0.791899	0.943162
+pH fractionation/SP	High	P21127		Cyclin-dependent kinase 11B OS=Homo sapiens OX=9606 GN=CDK11B PE=1 SV=4		CDK11B	0	2.75829	3.32664	0.216549	0.139241	0.0187188	0.155517	0.568354	0.0187188	0.160441	4.26802	4.1081	0.74439	0.164527	0.734735	0.921826	-0.159925	0.734735	0.928386
+pH fractionation/SP	High	P21266		Glutathione S-transferase Mu 3 OS=Homo sapiens OX=9606 GN=GSTM3 PE=1 SV=3	ENSG00000134202	GSTM3	0	2.30241	2.5014	0.232263	0.280939	0.397928	0.645006	0.198991	0.397928	0.639255	-0.263147	1.24404	0.379567	0.868544	0.0511572	0.424829	1.50719	0.0511572	0.434854
+pH fractionation/SP	High	P21281		V-type proton ATPase subunit B, brain isoform OS=Homo sapiens OX=9606 GN=ATP6V1B2 PE=1 SV=3	ENSG00000147416	ATP6V1B2	0	3.56996	3.47671	0.185096	0.0935867	0.47965	0.707549	-0.0932484	0.47965	0.702271	1.31614	2.39509	0.37428	0.40494	0.0275538	0.33299	1.07895	0.0275538	0.34491
+pH fractionation/SP	High	P21283		V-type proton ATPase subunit C 1 OS=Homo sapiens OX=9606 GN=ATP6V1C1 PE=1 SV=4	ENSG00000155097	ATP6V1C1	0	1.81561	1.75001	0.102809	0.26086	0.706024	0.844128	-0.0656048	0.706024	0.841032	-0.132378	0.906463	0.414203	0.612817	0.0717783	0.46586	1.03884	0.0717783	0.472474
+pH fractionation/SP	High	P21291		Cysteine and glycine-rich protein 1 OS=Homo sapiens OX=9606 GN=CSRP1 PE=1 SV=3	ENSG00000159176	CSRP1	0	0.922085	0.473131	0.114978	0.360938	0.109344	0.343022	-0.448954	0.109344	0.350066	-0.866806	-1.59092	0.725209	0.964663	0.357389	0.760249	-0.724111	0.357389	0.762241
+pH fractionation/SP	High	P21333		Filamin-A OS=Homo sapiens OX=9606 GN=FLNA PE=1 SV=4	ENSG00000196924	FLNA	0	8.0724	8.49894	0.217006	0.211029	0.0711526	0.274006	0.426546	0.0711526	0.285894	7.405	7.61472	0.458911	0.35707	0.566033	0.864582	0.209717	0.566033	0.864834
+pH fractionation/SP	High	P21359		Neurofibromin OS=Homo sapiens OX=9606 GN=NF1 PE=1 SV=2	ENSG00000196712	NF1	0	-1.58377	-2.07398	0.590886	1.08862	0.530701	0.740231	-0.490212	0.530701	0.735298	-3.28886	-2.29128	2.20014	2.59577	0.638324	0.888756	0.997581	0.638324	0.894702
+pH fractionation/SP	High	P21399		Cytoplasmic aconitate hydratase OS=Homo sapiens OX=9606 GN=ACO1 PE=1 SV=3	ENSG00000122729	ACO1	0	2.85755	2.78991	0.229433	0.326673	0.783771	0.89224	-0.0676334	0.783771	0.889662	0.244459	0.335284	0.206558	0.352209	0.719642	0.917782	0.0908249	0.719642	0.922606
+pH fractionation/SP	High	P21580		Tumor necrosis factor alpha-induced protein 3 OS=Homo sapiens OX=9606 GN=TNFAIP3 PE=1 SV=1	ENSG00000118503	TNFAIP3	0	-2.08077	0.758497	0.336964	0.621255	0.00224184	0.0727992	2.83927	0.00224184	0.0740964	-3.01511	-0.995279	0.26081	0.552727	0.00461026	0.186708	2.01983	0.00461026	0.194535
+pH fractionation/SP	High	P21675-4		Isoform 4 of Transcription initiation factor TFIID subunit 1 OS=Homo sapiens OX=9606 GN=TAF1		TAF1	0	-0.212511	0.48059	2.4132	3.14561	0.777137	0.88776	0.693102	0.777137	0.885108	1.56172	1.74177	1.37133	2.13936	0.908244	0.975231	0.180053	0.908244	0.974641
+pH fractionation/SP	High	P21796		Voltage-dependent anion-selective channel protein 1 OS=Homo sapiens OX=9606 GN=VDAC1 PE=1 SV=2	ENSG00000213585	VDAC1	0	5.73648	5.73393	0.209415	0.176702	0.98791	0.994349	-0.00255019	0.98791	0.993781	3.21584	3.75471	0.261327	0.19684	0.0462648	0.410679	0.538864	0.0462648	0.422042
+pH fractionation/SP	High	P21912		Succinate dehydrogenase [ubiquinone] iron-sulfur subunit, mitochondrial OS=Homo sapiens OX=9606 GN=SDHB PE=1 SV=3	ENSG00000117118	SDHB	0	1.72668	1.73618	0.118413	0.303949	0.962204	0.983653	0.00949594	0.962204	0.983301	-0.189089	0.147452	0.592385	0.556807	0.513019	0.839378	0.336541	0.513019	0.840354
+pH fractionation/SP	High	P21953		2-oxoisovalerate dehydrogenase subunit beta, mitochondrial OS=Homo sapiens OX=9606 GN=BCKDHB PE=1 SV=2	ENSG00000083123	BCKDHB	0.001	-2.12348	-2.13309	0.573613	0.904388	0.988349	0.994349	-0.00960569	0.988349	0.993781	-4.11927	-3.92291	0.0969852	0.820396	0.769955	0.934993	1.12214	0.341589	0.749401
+pH fractionation/SP	High	P21964		Catechol O-methyltransferase OS=Homo sapiens OX=9606 GN=COMT PE=1 SV=2	ENSG00000093010	COMT	0	1.36317	1.52567	0.0321561	0.35213	0.470608	0.69895	0.162499	0.470608	0.694438	4.47043	3.28945	0.161244	0.9634	0.104346	0.51538	-1.18098	0.104346	0.520254
+pH fractionation/SP	High	P22033		Methylmalonyl-CoA mutase, mitochondrial OS=Homo sapiens OX=9606 GN=MUT PE=1 SV=4	ENSG00000146085	MUT	0	1.21858	1.42453	0.0887629	0.393834	0.42683	0.667105	0.205949	0.42683	0.662221	0.873118	0.285287	1.30059	1.13814	0.587444	0.870676	-0.587831	0.587444	0.872564
+pH fractionation/SP	High	P22059		Oxysterol-binding protein 1 OS=Homo sapiens OX=9606 GN=OSBP PE=1 SV=1	ENSG00000110048	OSBP	0	3.05733	3.21726	0.387342	0.249372	0.58005	0.770467	0.15993	0.58005	0.767822	1.49403	1.46962	1.07178	0.163485	0.970762	0.992325	-0.0244098	0.970762	0.991668
+pH fractionation/SP	High	P22061-2		Isoform 2 of Protein-L-isoaspartate(D-aspartate) O-methyltransferase OS=Homo sapiens OX=9606 GN=PCMT1		PCMT1	0	2.38738	2.92585	0.217425	0.29823	0.0648715	0.259493	0.538464	0.0648715	0.271188	0.959396	1.11824	0.0969953	0.0765453	0.0899441	0.487136	0.158845	0.0899441	0.493352
+pH fractionation/SP	High	P22087		rRNA 2'-O-methyltransferase fibrillarin OS=Homo sapiens OX=9606 GN=FBL PE=1 SV=2	ENSG00000280548	FBL	0	2.65035	1.21731	0.141974	0.284066	0.0014463	0.0604428	-1.43304	0.0014463	0.0602391	7.47004	7.14843	0.169379	0.155552	0.0725865	0.466101	-0.321608	0.0725865	0.472649
+pH fractionation/SP	High	P22090		40S ribosomal protein S4, Y isoform 1 OS=Homo sapiens OX=9606 GN=RPS4Y1 PE=1 SV=2	ENSG00000129824	RPS4Y1	0	0.646062	0.648256	0.269503	0.137583	0.990581	0.995286	0.00219407	0.990581	0.994613	2.36042	2.04555	0.69369	0.913817	0.659325	0.896129	-0.314871	0.659325	0.901993
+pH fractionation/SP	High	P22102		Trifunctional purine biosynthetic protein adenosine-3 OS=Homo sapiens OX=9606 GN=GART PE=1 SV=1	ENSG00000159131	GART	0	5.48456	4.71342	0.380143	0.415968	0.0767989	0.285457	-0.771141	0.0767989	0.296266	4.25218	4.32377	0.649698	0.27081	0.86872	0.964599	0.0715928	0.86872	0.964679
+pH fractionation/SP	High	P22234		Multifunctional protein ADE2 OS=Homo sapiens OX=9606 GN=PAICS PE=1 SV=3	ENSG00000128050	PAICS	0	6.38157	5.45404	0.0873956	0.0846784	0.000190192	0.0301033	-0.927525	0.000190192	0.0278667	3.91782	3.78534	0.221771	0.279508	0.555178	0.860655	-0.132476	0.555178	0.860036
+pH fractionation/SP	High	P22307		Non-specific lipid-transfer protein OS=Homo sapiens OX=9606 GN=SCP2 PE=1 SV=2	ENSG00000116171	SCP2	0	2.99373	3.42494	0.0866531	0.185656	0.0218603	0.165973	0.431209	0.0218603	0.171764	1.56508	1.51982	0.684345	0.396712	0.925825	0.98107	-0.0452595	0.925825	0.980013
+pH fractionation/SP	High	P22314		Ubiquitin-like modifier-activating enzyme 1 OS=Homo sapiens OX=9606 GN=UBA1 PE=1 SV=3	ENSG00000130985	UBA1	0	6.89551	6.94092	0.223058	0.0682774	0.752921	0.872568	0.0454136	0.752921	0.87031	4.16948	4.67928	0.350531	0.0675336	0.0686868	0.460647	0.509794	0.0686868	0.467905
+pH fractionation/SP	High	P22392-2		Isoform 3 of Nucleoside diphosphate kinase B OS=Homo sapiens OX=9606 GN=NME2	ENSG00000011052	NME1-NME2; NME1; NME2	0	7.382	6.94987	0.0214033	0.0402598	8.06209e-05	0.0234895	-0.432136	8.06209e-05	0.0219357	3.83379	3.37655	0.381666	0.222828	0.147613	0.574369	-0.457238	0.147613	0.574992
+pH fractionation/SP	High	P22413		Ectonucleotide pyrophosphatase/phosphodiesterase family member 1 OS=Homo sapiens OX=9606 GN=ENPP1 PE=1 SV=2	ENSG00000197594	ENPP1	0	-3.53462	0.158143	1.09088	0.0208869	0.00422716	0.0900454	3.69277	0.00422716	0.0889328	-2.55646	-3.31809	0.178046	1.50221	0.432393	0.807458	-0.761633	0.432393	0.813496
+pH fractionation/SP	High	P22415		Upstream stimulatory factor 1 OS=Homo sapiens OX=9606 GN=USF1 PE=1 SV=1	ENSG00000158773	USF1	0.001	-5.81471	-5.38718	N.D.	0.945013	N.D.	NA	0.603871	0.354398	0.603358	-1.43061	-0.543347	0.845885	0.780988	0.252836	0.692507	0.887266	0.252836	0.688613
+pH fractionation/SP	High	P22492		Histone H1t OS=Homo sapiens OX=9606 GN=HIST1H1T PE=2 SV=4	ENSG00000187475	HIST1H1T	0	-5.86614	-4.07385	0.865281	2.12708	0.247807	0.510559	1.79229	0.247807	0.512028	-1.69665	-3.12461	0.999027	1.94293	0.320865	0.739654	-1.42796	0.320865	0.741918
+pH fractionation/SP	High	P22570-3		Isoform 3 of NADPH:adrenodoxin oxidoreductase, mitochondrial OS=Homo sapiens OX=9606 GN=FDXR		FDXR	0	0.53711	0.783918	0.0924348	0.293315	0.236876	0.497129	0.246807	0.236876	0.500212	-0.952572	-0.585894	0.724813	1.08953	0.652825	0.892268	0.366678	0.652825	0.898923
+pH fractionation/SP	High	P22626		Heterogeneous nuclear ribonucleoproteins A2/B1 OS=Homo sapiens OX=9606 GN=HNRNPA2B1 PE=1 SV=2	ENSG00000122566	HNRNPA2B1	0	6.61651	6.0395	0.195628	0.301094	0.0496474	0.22833	-0.577011	0.0496474	0.237926	10.9696	11.0165	0.291549	0.237781	0.839617	0.953105	0.0468992	0.839617	0.956532
+pH fractionation/SP	High	P22670		MHC class II regulatory factor RFX1 OS=Homo sapiens OX=9606 GN=RFX1 PE=1 SV=2	ENSG00000132005	RFX1	0	-2.76163	-2.70771	0.2012	0.675004	0.900917	0.956229	0.0539205	0.900917	0.954976	1.17029	0.67902	0.404766	0.356474	0.189788	0.63335	-0.491272	0.189788	0.631936
+pH fractionation/SP	High	P22681		E3 ubiquitin-protein ligase CBL OS=Homo sapiens OX=9606 GN=CBL PE=1 SV=2	ENSG00000110395	CBL	0	0.633783	1.95359	0.0514767	0.378998	0.00393821	0.0882978	1.31981	0.00393821	0.0876026	0.430455	0.565684	1.11203	1.09695	0.888062	0.969804	0.135229	0.888062	0.969051
+pH fractionation/SP	High	P22694-2		Isoform 2 of cAMP-dependent protein kinase catalytic subunit beta OS=Homo sapiens OX=9606 GN=PRKACB	ENSG00000142875	PRKACB	0	-1.37442	-0.828357	0.102935	0.132726	0.00489323	0.0952617	0.546061	0.00489323	0.0937052	-2.66078	-2.312	0.59323	0.983337	0.626677	0.883268	0.348786	0.626677	0.888587
+pH fractionation/SP	High	P22695		Cytochrome b-c1 complex subunit 2, mitochondrial OS=Homo sapiens OX=9606 GN=UQCRC2 PE=1 SV=3	ENSG00000140740	UQCRC2	0	4.09983	3.66766	0.240109	0.270023	0.10704	0.338667	-0.432166	0.10704	0.34641	1.52676	1.58646	0.205288	0.216061	0.746114	0.923001	0.0597	0.746114	0.92931
+pH fractionation/SP	High	P22830-2		Isoform 2 of Ferrochelatase, mitochondrial OS=Homo sapiens OX=9606 GN=FECH	ENSG00000066926	FECH	0	1.30372	0.734426	0.120742	0.11296	0.00397012	0.0883351	-0.569291	0.00397012	0.0876677	-1.35759	-0.702249	0.571251	0.0805697	0.12051	0.539946	0.655337	0.12051	0.543271
+pH fractionation/SP	High	P23193		Transcription elongation factor A protein 1 OS=Homo sapiens OX=9606 GN=TCEA1 PE=1 SV=2	ENSG00000187735	TCEA1	0	2.78011	2.277	0.237114	0.097097	0.0272516	0.181832	-0.503117	0.0272516	0.188208	2.32354	1.76684	0.154707	0.143215	0.010232	0.242645	-0.556695	0.010232	0.250807
+pH fractionation/SP	High	P23229		Integrin alpha-6 OS=Homo sapiens OX=9606 GN=ITGA6 PE=1 SV=5	ENSG00000091409	ITGA6	0.002	-5.1074	-4.17591	0.506452	1.40461	0.452011	0.683993	1.19407	0.245042	0.508942	-5.85906	-5.73652	N.D.	N.D.	N.D.	NA	0.232307	0.598459	0.879045
+pH fractionation/SP	High	P23246		Splicing factor, proline- and glutamine-rich OS=Homo sapiens OX=9606 GN=SFPQ PE=1 SV=2	ENSG00000116560	SFPQ	0	6.72432	6.42724	0.154334	0.562332	0.427387	0.667323	-0.297085	0.427387	0.662482	7.91867	7.56284	0.464889	0.559181	0.444439	0.813824	-0.355825	0.444439	0.818255
+pH fractionation/SP	High	P23258		Tubulin gamma-1 chain OS=Homo sapiens OX=9606 GN=TUBG1 PE=1 SV=2	ENSG00000131462	TUBG1	0	2.3909	1.81042	0.491907	0.307144	0.157993	0.409823	-0.580482	0.157993	0.414862	1.76628	1.86512	0.311257	0.528693	0.794037	0.939822	0.0988442	0.794037	0.943598
+pH fractionation/SP	High	P23284		Peptidyl-prolyl cis-trans isomerase B OS=Homo sapiens OX=9606 GN=PPIB PE=1 SV=2	ENSG00000166794	PPIB	0	4.86582	4.46799	0.192505	0.237136	0.0870656	0.303876	-0.39783	0.0870656	0.313578	5.06916	4.0993	0.429544	0.104269	0.0190969	0.285456	-0.969861	0.0190969	0.295506
+pH fractionation/SP	High	P23368		NAD-dependent malic enzyme, mitochondrial OS=Homo sapiens OX=9606 GN=ME2 PE=1 SV=1	ENSG00000082212	ME2	0	4.29461	4.42309	0.075489	0.089108	0.12942	0.371782	0.128479	0.12942	0.377357	2.09637	2.18028	0.228092	0.383192	0.76082	0.929924	0.0839135	0.76082	0.935369
+pH fractionation/SP	High	P23381		Tryptophan--tRNA ligase, cytoplasmic OS=Homo sapiens OX=9606 GN=WARS PE=1 SV=2	ENSG00000140105	WARS	0	2.93325	3.3381	0.160839	0.120061	0.0250387	0.174329	0.404847	0.0250387	0.179841	2.18151	2.19523	0.230266	0.539803	0.969645	0.992325	0.0137183	0.969645	0.991668
+pH fractionation/SP	High	P23396		40S ribosomal protein S3 OS=Homo sapiens OX=9606 GN=RPS3 PE=1 SV=2	ENSG00000149273	RPS3	0	6.54567	6.34717	0.1742	0.238664	0.309249	0.5701	-0.198509	0.309249	0.566828	7.6942	7.04035	0.353376	0.278748	0.065623	0.457989	-0.653845	0.065623	0.464479
+pH fractionation/SP	High	P23434		Glycine cleavage system H protein, mitochondrial OS=Homo sapiens OX=9606 GN=GCSH PE=1 SV=2	ENSG00000140905	GCSH	0.009	-0.704486	-1.01027	0.359724	0.128702	0.237925	0.498132	-0.305787	0.237925	0.500678	-2.98906	-4.99551	1.32281	0.0516159	0.165305	0.603091	-1.3457	0.389917	0.786217
+pH fractionation/SP	High	P23443		Ribosomal protein S6 kinase beta-1 OS=Homo sapiens OX=9606 GN=RPS6KB1 PE=1 SV=2	ENSG00000108443	RPS6KB1	0.004	-4.28959	-4.38675	0.0484409	0.645264	0.807651	0.902691	-0.0971582	0.807651	0.900653	-5.91499	-4.20408	N.D.	N.D.	N.D.	NA	0.788	0.39233	0.7889
+pH fractionation/SP	High	P23458		Tyrosine-protein kinase JAK1 OS=Homo sapiens OX=9606 GN=JAK1 PE=1 SV=2	ENSG00000162434	JAK1	0	-1.6149	-0.653269	0.187249	0.853456	0.129306	0.371677	0.961626	0.129306	0.37724	-2.00833	-2.49235	0.112362	0.575438	0.225973	0.667758	-0.484023	0.225973	0.667399
+pH fractionation/SP	High	P23469		Receptor-type tyrosine-protein phosphatase epsilon OS=Homo sapiens OX=9606 GN=PTPRE PE=1 SV=1	ENSG00000132334	PTPRE	0	-2.01415	1.12513	0.20409	0.677329	0.00154093	0.0614955	3.13929	0.00154093	0.0620755	-1.33009	-1.30102	0.0574742	1.78172	0.978818	0.99425	0.029073	0.978818	0.994594
+pH fractionation/SP	High	P23497-4		Isoform Sp100-C of Nuclear autoantigen Sp-100 OS=Homo sapiens OX=9606 GN=SP100	ENSG00000067066	SP100	0	-0.252687	-0.457818	0.490235	0.378168	0.596793	0.780459	-0.205131	0.596793	0.777561	1.78022	2.54334	0.105322	0.295431	0.0135402	0.255633	0.763119	0.0135402	0.267055
+pH fractionation/SP	High	P23511		Nuclear transcription factor Y subunit alpha OS=Homo sapiens OX=9606 GN=NFYA PE=1 SV=2	ENSG00000001167	NFYA	0	-2.05603	-2.10793	0.829982	2.83707	0.977199	0.990178	-0.0518951	0.977199	0.98917	-0.188782	-0.284195	0.619655	0.371189	0.830253	0.95145	-0.0954133	0.830253	0.955087
+pH fractionation/SP	High	P23526		Adenosylhomocysteinase OS=Homo sapiens OX=9606 GN=AHCY PE=1 SV=4	ENSG00000101444	AHCY	0	6.32887	5.89306	0.136521	0.214364	0.0411388	0.213744	-0.435811	0.0411388	0.222524	3.47064	3.81513	0.22721	0.40863	0.27095	0.703384	0.344497	0.27095	0.69926
+pH fractionation/SP	High	P23528		Cofilin-1 OS=Homo sapiens OX=9606 GN=CFL1 PE=1 SV=3	ENSG00000172757	CFL1	0	6.69306	7.22999	0.370348	0.22109	0.0973067	0.322883	0.536936	0.0973067	0.33204	5.1475	6.09102	0.942324	0.2368	0.16787	0.607205	0.943519	0.16787	0.607342
+pH fractionation/SP	High	P23588		Eukaryotic translation initiation factor 4B OS=Homo sapiens OX=9606 GN=EIF4B PE=1 SV=2	ENSG00000063046	EIF4B	0	4.51918	3.47606	0.26911	0.0354396	0.00264571	0.0767917	-1.04313	0.00264571	0.0785637	2.97804	1.89116	0.318418	0.294977	0.0122807	0.249391	-1.08688	0.0122807	0.259106
+pH fractionation/SP	High	P23634		Plasma membrane calcium-transporting ATPase 4 OS=Homo sapiens OX=9606 GN=ATP2B4 PE=1 SV=2		ATP2B4	0	2.38811	2.41613	0.183237	0.176289	0.857949	0.932065	0.0280154	0.857949	0.931247	0.813446	0.437006	0.15293	0.458278	0.248473	0.687922	-0.37644	0.248473	0.686039
+pH fractionation/SP	High	P23743		Diacylglycerol kinase alpha OS=Homo sapiens OX=9606 GN=DGKA PE=1 SV=3	ENSG00000065357	DGKA	0	2.50049	4.43543	0.174398	0.305805	0.0006797	0.0424239	1.93493	0.0006797	0.041953	1.82066	3.25887	0.467426	0.0999849	0.00646549	0.201689	1.4382	0.00646549	0.208319
+pH fractionation/SP	High	P23771-2		Isoform 2 of Trans-acting T-cell-specific transcription factor GATA-3 OS=Homo sapiens OX=9606 GN=GATA3	ENSG00000107485	GATA3	0	-4.61617	-3.3515	0.193065	1.16923	0.138244	0.384491	1.26468	0.138244	0.389563	0.618477	2.75833	0.06674	0.256105	0.000150831	0.0481076	2.13986	0.000150831	0.04696
+pH fractionation/SP	High	P23786		Carnitine O-palmitoyltransferase 2, mitochondrial OS=Homo sapiens OX=9606 GN=CPT2 PE=1 SV=2	ENSG00000157184	CPT2	0	2.09633	2.3689	0.0295711	0.338774	0.237371	0.497733	0.272565	0.237371	0.500432	0.766648	0.700235	0.328659	0.343288	0.82065	0.948615	-0.0664132	0.82065	0.952031
+pH fractionation/SP	High	P23919		Thymidylate kinase OS=Homo sapiens OX=9606 GN=DTYMK PE=1 SV=4	ENSG00000168393	DTYMK	0	2.73424	2.29212	0.0867129	0.0902663	0.00361491	0.0854564	-0.442115	0.00361491	0.0860323	3.24734	2.08732	0.554257	0.78576	0.104889	0.51538	-1.16002	0.104889	0.520254
+pH fractionation/SP	High	P23921		Ribonucleoside-diphosphate reductase large subunit OS=Homo sapiens OX=9606 GN=RRM1 PE=1 SV=1	ENSG00000167325	RRM1	0	4.18442	1.38744	0.147085	0.227363	5.7372e-05	0.0229775	-2.79698	5.7372e-05	0.0219357	3.3749	2.19306	0.795615	0.462136	0.0901328	0.487136	-1.18184	0.0901328	0.493352
+pH fractionation/SP	High	P24386		Rab proteins geranylgeranyltransferase component A 1 OS=Homo sapiens OX=9606 GN=CHM PE=1 SV=3	ENSG00000188419	CHM	0.001	-0.92065	-1.72501	0.280987	1.03873	0.265102	0.528226	-0.804359	0.265102	0.528657	-3.72599	-3.03063	1.11588	1.15216	0.494477	0.836422	0.69536	0.494477	0.836876
+pH fractionation/SP	High	P24390		ER lumen protein-retaining receptor 1 OS=Homo sapiens OX=9606 GN=KDELR1 PE=1 SV=1	ENSG00000105438	KDELR1	0.002	0.388019	0.0470727	0.361332	0.0527567	0.297003	0.558386	-2.32703	0.30869	0.566613	-2.75664	-1.53608	0.0519375	0.0951553	0.00392102	0.177943	0.941072	0.678762	0.910839
+pH fractionation/SP	High	P24534		Elongation factor 1-beta OS=Homo sapiens OX=9606 GN=EEF1B2 PE=1 SV=3	ENSG00000283391	EEF1B2	0	5.15234	4.67048	0.657309	0.355354	0.326575	0.587395	-0.48186	0.326575	0.582665	2.71022	2.74484	0.249307	0.210328	0.863071	0.963032	0.0346235	0.863071	0.963383
+pH fractionation/SP	High	P24539		ATP synthase F(0) complex subunit B1, mitochondrial OS=Homo sapiens OX=9606 GN=ATP5F1 PE=1 SV=2	ENSG00000116459	ATP5F1	0	1.74849	1.09383	0.937631	1.1374	0.484652	0.709915	-0.654664	0.484652	0.705174	0.168975	-1.15606	1.53468	3.01207	0.534452	0.850731	-1.32503	0.534452	0.850838
+pH fractionation/SP	High	P24666		Low molecular weight phosphotyrosine protein phosphatase OS=Homo sapiens OX=9606 GN=ACP1 PE=1 SV=3	ENSG00000143727	ACP1	0	1.99774	2.4977	0.327746	0.136163	0.0712118	0.274014	0.499958	0.0712118	0.285907	0.238971	0.359058	0.60068	1.03605	0.870553	0.964853	0.120087	0.870553	0.964679
+pH fractionation/SP	High	P24666-2		Isoform 2 of Low molecular weight phosphotyrosine protein phosphatase OS=Homo sapiens OX=9606 GN=ACP1	ENSG00000143727	ACP1	0	-0.315602	-0.663241	0.547742	0.29695	0.484657	0.709915	-2.14913	0.306083	0.564047		-8.38306	N.D.	N.D.	N.D.	NA	-0.442665	0.516823	0.841442
+pH fractionation/SP	High	P24752		Acetyl-CoA acetyltransferase, mitochondrial OS=Homo sapiens OX=9606 GN=ACAT1 PE=1 SV=1	ENSG00000075239	ACAT1	0	3.70638	3.26238	0.211553	0.457179	0.201566	0.462554	-0.443999	0.201566	0.465721	2.30351	2.39029	0.905103	0.754659	0.904665	0.974029	0.0867768	0.904665	0.973295
+pH fractionation/SP	High	P24863		Cyclin-C OS=Homo sapiens OX=9606 GN=CCNC PE=1 SV=2	ENSG00000112237	CCNC	0.005	-3.58145	-3.55534	0.483831	0.526494	0.952601	0.979085	0.0261119	0.952601	0.978187	-3.23902	-4.00537	0.962991	0.549819	0.297394	0.717646	-0.766351	0.297394	0.717553
+pH fractionation/SP	High	P24928		DNA-directed RNA polymerase II subunit RPB1 OS=Homo sapiens OX=9606 GN=POLR2A PE=1 SV=2		POLR2A	0	2.03022	1.80173	0.207219	0.211985	0.25278	0.514865	-0.228491	0.25278	0.516657	5.11254	4.82975	0.00819869	0.287096	0.163319	0.601035	-0.282793	0.163319	0.601498
+pH fractionation/SP	High	P24941		Cyclin-dependent kinase 2 OS=Homo sapiens OX=9606 GN=CDK2 PE=1 SV=2	ENSG00000123374	CDK2	0	0.120328	-1.34837	0.170301	0.970735	0.0612546	0.25326	-1.4687	0.0612546	0.264176	1.68537	-0.0631249	0.721476	2.22095	0.264421	0.7007	-1.7485	0.264421	0.696109
+pH fractionation/SP	High	P25098		Beta-adrenergic receptor kinase 1 OS=Homo sapiens OX=9606 GN=GRK2 PE=1 SV=2	ENSG00000173020	ADRBK1; GRK2	0	3.02908	2.07101	1.11577	0.206499	0.217447	0.479699	-0.958074	0.217447	0.483288	0.18115	0.263868	0.654816	0.0593207	0.838167	0.953105	0.0827188	0.838167	0.956414
+pH fractionation/SP	High	P25205-2		Isoform 2 of DNA replication licensing factor MCM3 OS=Homo sapiens OX=9606 GN=MCM3	ENSG00000112118	MCM3	0	5.42882	4.44555	0.173103	0.131909	0.00143968	0.0604428	-0.98327	0.00143968	0.0602391	6.30291	4.81777	0.297272	0.222547	0.00227982	0.151527	-1.48514	0.00227982	0.150738
+pH fractionation/SP	High	P25208		Nuclear transcription factor Y subunit beta OS=Homo sapiens OX=9606 GN=NFYB PE=1 SV=2	ENSG00000120837	NFYB	0.006	-4.19556	-2.73622	N.D.	1.0327	N.D.	NA	1.62727	0.302369	0.560802	-1.37917	-0.40191	1.90082	0.0506432	0.539973	0.853939	-1.02408	0.676916	0.910027
+pH fractionation/SP	High	P25325-2		Isoform 2 of 3-mercaptopyruvate sulfurtransferase OS=Homo sapiens OX=9606 GN=MPST	ENSG00000128309	MPST	0	1.37062	0.900598	0.208683	0.074754	0.0213415	0.163523	-0.470026	0.0213415	0.169198	1.28412	0.762109	0.773573	0.774126	0.455138	0.819245	-0.522011	0.455138	0.822957
+pH fractionation/SP	High	P25398		40S ribosomal protein S12 OS=Homo sapiens OX=9606 GN=RPS12 PE=1 SV=3	ENSG00000112306	RPS12	0	4.13476	4.25218	0.234765	0.449705	0.708972	0.845698	0.117424	0.708972	0.842902	5.4152	4.96068	0.592345	0.518406	0.373855	0.771959	-0.454514	0.373855	0.77541
+pH fractionation/SP	High	P25440-2		Isoform 2 of Bromodomain-containing protein 2 OS=Homo sapiens OX=9606 GN=BRD2	ENSG00000204256	BRD2	0	0.126186	-2.06319	1.82663	0.7538	0.127414	0.369775	-2.18937	0.127414	0.375355	4.11367	3.07387	0.0371558	0.379518	0.00915186	0.232447	-1.03981	0.00915186	0.240436
+pH fractionation/SP	High	P25445		Tumor necrosis factor receptor superfamily member 6 OS=Homo sapiens OX=9606 GN=FAS PE=1 SV=1	ENSG00000026103	FAS	0.004	-2.92516	-2.94768	0.0222653	0.910651	0.96789	0.985729	-0.0225251	0.96789	0.985002			N.D.	N.D.	N.D.	NA	0.21167	0.183002	0.622704
+pH fractionation/SP	High	P25490		Transcriptional repressor protein YY1 OS=Homo sapiens OX=9606 GN=YY1 PE=1 SV=2	ENSG00000100811	YY1	0	1.24408	0.377647	0.30601	0.431034	0.0469174	0.223026	-0.866434	0.0469174	0.232454	2.65477	2.47116	0.521867	0.186029	0.596682	0.875679	-0.183616	0.596682	0.877904
+pH fractionation/SP	High	P25685		DnaJ homolog subfamily B member 1 OS=Homo sapiens OX=9606 GN=DNAJB1 PE=1 SV=4	ENSG00000132002	DNAJB1	0	4.09234	2.88937	0.28527	0.459294	0.0182448	0.153545	-1.20297	0.0182448	0.15841	2.31719	2.19911	0.313536	0.199837	0.611564	0.879356	-0.118072	0.611564	0.882426
+pH fractionation/SP	High	P25705		ATP synthase subunit alpha, mitochondrial OS=Homo sapiens OX=9606 GN=ATP5F1A PE=1 SV=1	ENSG00000152234	ATP5A1	0	7.17062	7.29543	0.109569	0.110346	0.236816	0.497129	0.124817	0.236816	0.500212	4.69599	5.29865	0.454145	0.320233	0.133518	0.557085	0.602669	0.133518	0.558834
+pH fractionation/SP	High	P25786-2		Isoform Long of Proteasome subunit alpha type-1 OS=Homo sapiens OX=9606 GN=PSMA1	ENSG00000129084	PSMA1	0	5.32715	5.03567	0.435583	0.34801	0.416387	0.659082	-0.291489	0.416387	0.65391	2.17913	2.1252	0.681842	0.544056	0.919883	0.979257	-0.0539265	0.919883	0.978777
+pH fractionation/SP	High	P25787		Proteasome subunit alpha type-2 OS=Homo sapiens OX=9606 GN=PSMA2 PE=1 SV=2	ENSG00000256646	PSMA2	0	3.93951	4.07777	0.318656	0.289263	0.607572	0.787271	0.138259	0.607572	0.784423	1.78844	2.11852	0.741562	0.505889	0.558833	0.86094	0.330077	0.558833	0.861282
+pH fractionation/SP	High	P25788		Proteasome subunit alpha type-3 OS=Homo sapiens OX=9606 GN=PSMA3 PE=1 SV=2	ENSG00000100567	PSMA3	0	5.39604	5.40173	0.0510912	0.255127	0.971616	0.987824	0.00568682	0.971616	0.987274	2.02629	2.16982	0.304368	0.150669	0.504749	0.83679	0.143529	0.504749	0.838731
+pH fractionation/SP	High	P25789		Proteasome subunit alpha type-4 OS=Homo sapiens OX=9606 GN=PSMA4 PE=1 SV=1	ENSG00000041357	PSMA4	0	4.43739	4.63808	0.201089	0.37786	0.462317	0.691964	0.200682	0.462317	0.686706	2.00572	2.18553	0.229988	0.523716	0.615044	0.880408	0.179808	0.615044	0.884094
+pH fractionation/SP	High	P26038		Moesin OS=Homo sapiens OX=9606 GN=MSN PE=1 SV=3	ENSG00000147065	MSN	0	8.00435	8.88737	0.361173	0.244026	0.0246984	0.174211	0.883018	0.0246984	0.179841	5.65022	6.19798	0.967893	0.712696	0.47408	0.826533	0.547758	0.47408	0.829887
+pH fractionation/SP	High	P26196		Probable ATP-dependent RNA helicase DDX6 OS=Homo sapiens OX=9606 GN=DDX6 PE=1 SV=2	ENSG00000110367	DDX6	0	6.03545	6.04778	0.133718	0.583281	0.973228	0.988226	0.0123359	0.973228	0.98731	5.23585	5.64376	0.763445	0.485865	0.478586	0.830025	0.407902	0.478586	0.833616
+pH fractionation/SP	High	P26358-2		Isoform 2 of DNA (cytosine-5)-methyltransferase 1 OS=Homo sapiens OX=9606 GN=DNMT1	ENSG00000130816	DNMT1	0	4.05046	2.37919	0.0839451	0.27788	0.000568109	0.0410231	-1.67128	0.000568109	0.0401348	5.22312	3.70081	0.0345061	0.186684	0.000155823	0.0481076	-1.52232	0.000155823	0.04696
+pH fractionation/SP	High	P26368		Splicing factor U2AF 65 kDa subunit OS=Homo sapiens OX=9606 GN=U2AF2 PE=1 SV=4	ENSG00000063244	U2AF2	0	3.8445	3.97857	0.0790986	0.2517	0.428487	0.66774	0.134068	0.428487	0.662984	5.525	5.25353	0.213379	0.103289	0.118344	0.536645	-0.271462	0.118344	0.5418
+pH fractionation/SP	High	P26373		60S ribosomal protein L13 OS=Homo sapiens OX=9606 GN=RPL13 PE=1 SV=4	ENSG00000167526	RPL13	0	5.20204	4.81998	0.328895	0.155932	0.143198	0.39082	-0.382064	0.143198	0.396128	7.23832	6.58003	0.18818	0.129205	0.00751696	0.214349	-0.658291	0.00751696	0.220054
+pH fractionation/SP	High	P26378-3		Isoform 3 of ELAV-like protein 4 OS=Homo sapiens OX=9606 GN=ELAVL4		ELAVL4	0.002	-5.27697		0.0365717	N.D.	N.D.	NA	-0.38541	0.413314	0.65151	-6.71983	-4.88707	N.D.	2.03821	N.D.	NA	1.78925	0.205767	0.650326
+pH fractionation/SP	High	P26440		Isovaleryl-CoA dehydrogenase, mitochondrial OS=Homo sapiens OX=9606 GN=IVD PE=1 SV=1		IVD	0	1.52069	1.67179	0.161829	0.499971	0.644602	0.808389	0.151103	0.644602	0.806449	-0.578649	0.684231	1.07272	0.566946	0.145763	0.573187	1.26288	0.145763	0.573977
+pH fractionation/SP	High	P26583		High mobility group protein B2 OS=Homo sapiens OX=9606 GN=HMGB2 PE=1 SV=2	ENSG00000164104	HMGB2	0	4.10501	4.08798	0.313526	0.134077	0.935245	0.972057	-0.0170243	0.935245	0.971858	4.48578	4.18219	0.538	0.594524	0.547745	0.8575	-0.303598	0.547745	0.857167
+pH fractionation/SP	High	P26599-3		Isoform 3 of Polypyrimidine tract-binding protein 1 OS=Homo sapiens OX=9606 GN=PTBP1	ENSG00000011304	PTBP1	0	4.73873	4.677	0.255289	0.0838264	0.711023	0.84697	-0.0617285	0.711023	0.84436	7.35461	7.17981	0.420618	0.461901	0.653268	0.892268	-0.174804	0.653268	0.898923
+pH fractionation/SP	High	P26639-2		Isoform 2 of Threonine--tRNA ligase, cytoplasmic OS=Homo sapiens OX=9606 GN=TARS	ENSG00000113407	TARS	0	5.60034	5.37406	0.232782	0.142693	0.2245	0.486816	-0.226276	0.2245	0.489815	4.24669	4.1314	0.395993	0.301173	0.708669	0.912864	-0.115287	0.708669	0.919263
+pH fractionation/SP	High	P26640		Valine--tRNA ligase OS=Homo sapiens OX=9606 GN=VARS PE=1 SV=4	ENSG00000096171	VARS; VARS2	0	5.00503	4.40664	0.0805795	0.341299	0.041741	0.213804	-0.598388	0.041741	0.222524	3.32237	3.23907	0.584555	0.434266	0.852608	0.958849	-0.0832988	0.852608	0.960471
+pH fractionation/SP	High	P26641-2		Isoform 2 of Elongation factor 1-gamma OS=Homo sapiens OX=9606 GN=EEF1G		EEF1G	0	7.17851	6.79194	0.228372	0.0931932	0.0532867	0.236749	-0.386567	0.0532867	0.247112	4.7618	4.77099	0.0907288	0.206314	0.947102	0.9853	0.00918729	0.947102	0.985188
+pH fractionation/SP	High	P26885		Peptidyl-prolyl cis-trans isomerase FKBP2 OS=Homo sapiens OX=9606 GN=FKBP2 PE=1 SV=2	ENSG00000173486	FKBP2	0.001	0.720029	0.0696881	0.125394	1.15889	0.388595	0.638709	-0.65034	0.388595	0.632153	0.592614	-1.31531	0.268634	0.628119	0.0084165	0.22522	-1.90793	0.0084165	0.232307
+pH fractionation/SP	High	P27105		Erythrocyte band 7 integral membrane protein OS=Homo sapiens OX=9606 GN=STOM PE=1 SV=3	ENSG00000148175	STOM	0.002	-3.17893	-2.48363	1.53249	0.368226	0.487395	0.710902	0.695301	0.487395	0.706144	-2.49562	-2.35301	1.11986	0.659934	0.858539	0.960407	0.142612	0.858539	0.961092
+pH fractionation/SP	High	P27348		14-3-3 protein theta OS=Homo sapiens OX=9606 GN=YWHAQ PE=1 SV=1	ENSG00000134308	YWHAQ	0	5.6878	5.41935	0.459695	0.233919	0.418317	0.659431	-0.268446	0.418317	0.655019	3.32809	3.65862	0.61571	0.627514	0.550432	0.857951	0.33053	0.550432	0.857623
+pH fractionation/SP	High	P27361		Mitogen-activated protein kinase 3 OS=Homo sapiens OX=9606 GN=MAPK3 PE=1 SV=4	ENSG00000102882	MAPK3	0	1.21336	0.900114	0.274162	0.106885	0.138981	0.385871	-0.313249	0.138981	0.390994	0.144316	0.464379	0.54173	0.515604	0.499697	0.836645	0.320063	0.499697	0.837575
+pH fractionation/SP	High	P27448-7		Isoform 6 of MAP/microtubule affinity-regulating kinase 3 OS=Homo sapiens OX=9606 GN=MARK3		MARK3	0.002	-4.22305	-3.38051	1.11929	0.388596	0.399023	0.646344	-0.0770158	0.94916	0.976611	-3.80125		1.21113	N.D.	N.D.	NA	-2.72567	0.0177285	0.292977
+pH fractionation/SP	High	P27449		V-type proton ATPase 16 kDa proteolipid subunit OS=Homo sapiens OX=9606 GN=ATP6V0C PE=1 SV=1	ENSG00000185883	ATP6V0C	0.005	-2.89719	-2.46467	0.412798	0.762505	0.436322	0.673398	0.432522	0.436322	0.668844	-4.43183	-2.6181	N.D.	0.598163	N.D.	NA	3.42972	0.0180526	0.29386
+pH fractionation/SP	High	P27540		Aryl hydrocarbon receptor nuclear translocator OS=Homo sapiens OX=9606 GN=ARNT PE=1 SV=1	ENSG00000143437	ARNT	0.005	-3.77917	-4.34591	0.617231	N.D.	N.D.	NA	-1.73351	0.0650047	0.271188		-3.39449	N.D.	N.D.	N.D.	NA	1.29725	0.266069	0.696109
+pH fractionation/SP	High	P27635		60S ribosomal protein L10 OS=Homo sapiens OX=9606 GN=RPL10 PE=1 SV=4		RPL10	0	4.6026	4.4545	0.284638	0.269327	0.548455	0.74968	-0.148098	0.548455	0.745881	6.0682	5.66243	0.208027	0.317139	0.137501	0.56101	-0.405777	0.137501	0.561446
+pH fractionation/SP	High	P27694		Replication protein A 70 kDa DNA-binding subunit OS=Homo sapiens OX=9606 GN=RPA1 PE=1 SV=2	ENSG00000132383	RPA1	0	4.73722	4.55528	0.108142	0.078555	0.0778608	0.287624	-0.181941	0.0778608	0.298117	4.9492	4.80001	0.539778	0.559335	0.756254	0.927948	-0.14919	0.756254	0.932889
+pH fractionation/SP	High	P27695		DNA-(apurinic or apyrimidinic site) lyase OS=Homo sapiens OX=9606 GN=APEX1 PE=1 SV=2	ENSG00000100823	APEX1	0	3.68725	3.67485	0.506893	0.268901	0.971932	0.987824	-0.0124015	0.971932	0.987274	3.59654	3.08077	0.350165	0.416253	0.175868	0.619235	-0.515771	0.175868	0.618024
+pH fractionation/SP	High	P27701		CD82 antigen OS=Homo sapiens OX=9606 GN=CD82 PE=1 SV=1	ENSG00000085117	CD82	0	-0.6835	2.41833	0.311974	0.860565	0.00420846	0.0900454	3.10183	0.00420846	0.0889328	-0.245771	-0.845987	1.35569	0.396475	0.502552	0.83679	-0.600216	0.502552	0.83835
+pH fractionation/SP	High	P27707		Deoxycytidine kinase OS=Homo sapiens OX=9606 GN=DCK PE=1 SV=1	ENSG00000156136	DCK	0	2.42023	2.36127	0.0577213	0.0944057	0.408275	0.652538	-0.0589622	0.408275	0.64697	0.114958	0.830686	0.289485	0.464153	0.0860879	0.485872	0.715728	0.0860879	0.48973
+pH fractionation/SP	High	P27708		CAD protein OS=Homo sapiens OX=9606 GN=CAD PE=1 SV=3	ENSG00000084774	CAD	0	5.6455	4.76437	0.0990274	0.0342906	0.000129304	0.028386	-0.881125	0.000129304	0.0262191	3.7645	4.28843	0.341272	0.496321	0.206386	0.653027	0.523926	0.206386	0.650806
+pH fractionation/SP	High	P27797		Calreticulin OS=Homo sapiens OX=9606 GN=CALR PE=1 SV=1	ENSG00000179218	CALR	0	7.33814	6.51675	0.341616	0.613293	0.11265	0.346161	-0.821395	0.11265	0.35297	3.88082	4.33764	0.581242	0.371953	0.315469	0.734619	0.45682	0.315469	0.736958
+pH fractionation/SP	High	P27816		Microtubule-associated protein 4 OS=Homo sapiens OX=9606 GN=MAP4 PE=1 SV=3	ENSG00000047849	MAP4	0	2.90105	2.05916	0.335421	0.493927	0.0710301	0.274006	-0.841889	0.0710301	0.285894	2.44117	1.44473	0.0408361	0.370692	0.0098232	0.236571	-0.996435	0.0098232	0.244292
+pH fractionation/SP	High	P27824-2		Isoform 2 of Calnexin OS=Homo sapiens OX=9606 GN=CANX		CANX	0	5.81811	4.87429	0.609334	0.465866	0.100064	0.327147	-0.943815	0.100064	0.335269	3.69541	3.72676	0.941964	0.62375	0.963976	0.989739	0.0313449	0.963976	0.988937
+pH fractionation/SP	High	P27986-4		Isoform 4 of Phosphatidylinositol 3-kinase regulatory subunit alpha OS=Homo sapiens OX=9606 GN=PIK3R1		PIK3R1	0	0.628572	1.28221	0.081797	0.0571621	0.000344151	0.0373578	0.653643	0.000344151	0.0354238	0.356067	0.595492	1.4559	1.47746	0.851291	0.958031	0.239425	0.851291	0.96015
+pH fractionation/SP	High	P28062		Proteasome subunit beta type-8 OS=Homo sapiens OX=9606 GN=PSMB8 PE=1 SV=3	ENSG00000235715	PSMB8	0	2.22675	3.5637	0.262056	0.479279	0.0132713	0.137758	1.33695	0.0132713	0.139322	0.0373362	0.637104	0.603675	0.249458	0.186952	0.628058	0.599768	0.186952	0.627826
+pH fractionation/SP	High	P28065		Proteasome subunit beta type-9 OS=Homo sapiens OX=9606 GN=PSMB9 PE=1 SV=2	ENSG00000239836	PSMB9	0	2.46909	3.27103	0.273343	0.567807	0.0922262	0.313243	0.801936	0.0922262	0.322509	2.14299	1.83675	0.699666	0.687153	0.617307	0.881217	-0.306237	0.617307	0.885175
+pH fractionation/SP	High	P28066		Proteasome subunit alpha type-5 OS=Homo sapiens OX=9606 GN=PSMA5 PE=1 SV=3	ENSG00000143106	PSMA5	0	4.79011	4.98943	0.0796798	0.229297	0.228047	0.49049	0.199315	0.228047	0.493476	1.85002	2.18342	0.44784	0.430076	0.405003	0.789619	0.333397	0.405003	0.797645
+pH fractionation/SP	High	P28070		Proteasome subunit beta type-4 OS=Homo sapiens OX=9606 GN=PSMB4 PE=1 SV=4	ENSG00000159377	PSMB4	0	3.45221	3.58484	0.799691	0.760586	0.845277	0.924194	0.132633	0.845277	0.923555	-0.0946656	-0.107313	0.781882	1.12205	0.987988	0.995782	-0.012647	0.987988	0.996826
+pH fractionation/SP	High	P28072		Proteasome subunit beta type-6 OS=Homo sapiens OX=9606 GN=PSMB6 PE=1 SV=4	ENSG00000142507	PSMB6	0	3.85358	3.62817	0.135169	0.202573	0.184153	0.444794	-0.225413	0.184153	0.449097	0.578643	0.780932	0.308774	0.321546	0.475839	0.827422	0.202289	0.475839	0.830853
+pH fractionation/SP	High	P28074		Proteasome subunit beta type-5 OS=Homo sapiens OX=9606 GN=PSMB5 PE=1 SV=3	ENSG00000100804	PSMB5	0	4.68834	3.95358	0.299782	0.364491	0.0542815	0.239022	-0.734766	0.0542815	0.249531	8.48179	6.36311	1.29368	4.91184	0.509988	0.83851	-2.11868	0.509988	0.840328
+pH fractionation/SP	High	P28288		ATP-binding cassette sub-family D member 3 OS=Homo sapiens OX=9606 GN=ABCD3 PE=1 SV=1	ENSG00000117528	ABCD3	0	2.49926	1.94825	0.244152	0.157709	0.0304006	0.190738	-0.55101	0.0304006	0.196893	1.52593	1.73379	0.0531389	0.347806	0.364037	0.764939	0.207858	0.364037	0.768423
+pH fractionation/SP	High	P28290		Sperm-specific antigen 2 OS=Homo sapiens OX=9606 GN=SSFA2 PE=1 SV=3	ENSG00000138434	SSFA2	0	-2.44751	-2.0924	0.234454	0.520565	0.341984	0.601692	0.355103	0.341984	0.59658	-0.0140219	0.37842	0.272592	0.167471	0.100814	0.509291	0.392441	0.100814	0.513398
+pH fractionation/SP	High	P28331-2		Isoform 2 of NADH-ubiquinone oxidoreductase 75 kDa subunit, mitochondrial OS=Homo sapiens OX=9606 GN=NDUFS1	ENSG00000283447	NDUFS1	0	2.80138	3.27779	0.106333	0.283074	0.0525053	0.234517	0.47641	0.0525053	0.244754	0.755506	0.318966	0.619956	0.443722	0.377451	0.775252	-0.436539	0.377451	0.779083
+pH fractionation/SP	High	P28340		DNA polymerase delta catalytic subunit OS=Homo sapiens OX=9606 GN=POLD1 PE=1 SV=2	ENSG00000062822	POLD1	0	3.77148	1.94153	1.44748	1.49949	0.202951	0.464582	-1.82995	0.202951	0.468035	0.95652	0.49185	0.301733	0.525894	0.255059	0.694935	-0.46467	0.255059	0.691098
+pH fractionation/SP	High	P28370		Probable global transcription activator SNF2L1 OS=Homo sapiens OX=9606 GN=SMARCA1 PE=1 SV=2	ENSG00000102038	SMARCA1	0	-1.01928	-0.362152	3.65481	2.49031	0.8096	0.903608	0.657133	0.8096	0.901648	1.26697	1.22059	1.18233	0.845473	0.95858	0.98845	-0.0463758	0.95858	0.988012
+pH fractionation/SP	High	P28482		Mitogen-activated protein kinase 1 OS=Homo sapiens OX=9606 GN=MAPK1 PE=1 SV=3	ENSG00000100030	MAPK1	0	3.6473	2.86127	0.278998	0.332956	0.0350452	0.203115	-0.786036	0.0350452	0.210702	1.72738	1.85903	0.264724	0.234864	0.554459	0.860655	0.131647	0.554459	0.859713
+pH fractionation/SP	High	P28676		Grancalcin OS=Homo sapiens OX=9606 GN=GCA PE=1 SV=2	ENSG00000115271	GCA	0	-2.80595	-2.4298	0.968814	0.804952	0.632275	0.801772	0.376147	0.632275	0.799458	-3.31977	-4.23574	0.558203	1.11193	0.271282	0.703384	-0.915977	0.271282	0.69926
+pH fractionation/SP	High	P28715		DNA repair protein complementing XP-G cells OS=Homo sapiens OX=9606 GN=ERCC5 PE=1 SV=3	ENSG00000134899	ERCC5	0.001	-2.15251	-2.84347	0.372301	0.150359	0.0407118	0.212776	-0.690967	0.0407118	0.22199	-3.89325	-4.55857	0.85134	0.319823	0.385521	0.777525	-1.26791	0.183122	0.622704
+pH fractionation/SP	High	P28838		Cytosol aminopeptidase OS=Homo sapiens OX=9606 GN=LAP3 PE=1 SV=3	ENSG00000002549	LAP3	0	4.48365	4.26807	0.217235	0.414103	0.469298	0.698408	-0.215585	0.469298	0.693583	2.12934	2.59763	0.680013	0.247051	0.325007	0.741061	0.468291	0.325007	0.743334
+pH fractionation/SP	High	P28907		ADP-ribosyl cyclase/cyclic ADP-ribose hydrolase 1 OS=Homo sapiens OX=9606 GN=CD38 PE=1 SV=2	ENSG00000004468	CD38	0	-0.529796	0.248152	0.386394	0.533525	0.110257	0.344735	0.777948	0.110257	0.351589	0.278149	-0.490134	1.23979	3.14293	0.713778	0.915269	-0.768284	0.713778	0.92165
+pH fractionation/SP	High	P29016		T-cell surface glycoprotein CD1b OS=Homo sapiens OX=9606 GN=CD1B PE=1 SV=1	ENSG00000158485	CD1B	0	-0.249707	0.387509	0.0968147	0.577816	0.132691	0.377079	0.637216	0.132691	0.382542	0.458755	-0.0548795	1.65825	0.313333	0.625963	0.883268	-0.513634	0.625963	0.888477
+pH fractionation/SP	High	P29017		T-cell surface glycoprotein CD1c OS=Homo sapiens OX=9606 GN=CD1C PE=1 SV=2	ENSG00000158481	CD1C	0	0.629566	0.881843	0.467349	1.90909	0.834957	0.917787	0.252277	0.834957	0.917087	-2.70486	-1.89184	1.70846	1.18322	0.535188	0.85126	0.813023	0.535188	0.851235
+pH fractionation/SP	High	P29083		General transcription factor IIE subunit 1 OS=Homo sapiens OX=9606 GN=GTF2E1 PE=1 SV=2	ENSG00000153767	GTF2E1	0	-0.713324	-0.469411	0.346394	0.819338	0.659609	0.818262	0.243913	0.659609	0.816008	-1.64208	-1.46369	0.153729	0.858473	0.741007	0.922606	0.178395	0.741007	0.92892
+pH fractionation/SP	High	P29084		Transcription initiation factor IIE subunit beta OS=Homo sapiens OX=9606 GN=GTF2E2 PE=1 SV=1	ENSG00000197265	GTF2E2	0	0.139623	-0.348504	0.494371	0.181291	0.18363	0.444597	-0.488127	0.18363	0.449038	-0.849412	-0.780881	0.37301	0.263041	0.807655	0.943448	0.068531	0.807655	0.946823
+pH fractionation/SP	High	P29144		Tripeptidyl-peptidase 2 OS=Homo sapiens OX=9606 GN=TPP2 PE=1 SV=4	ENSG00000134900	TPP2	0	4.08576	4.04348	0.164361	0.488725	0.89393	0.952116	-0.0422789	0.89393	0.950681	1.64148	1.8281	0.281721	0.269627	0.45376	0.819245	0.186618	0.45376	0.822957
+pH fractionation/SP	High	P29218-3		Isoform 3 of Inositol monophosphatase 1 OS=Homo sapiens OX=9606 GN=IMPA1	ENSG00000133731	IMPA1	0	2.35301	3.2688	0.0958757	0.0384989	0.000105007	0.0265612	0.91579	0.000105007	0.0244523	0.896978	0.370936	1.13556	0.0916547	0.468652	0.824175	-0.526041	0.468652	0.828003
+pH fractionation/SP	High	P29320		Ephrin type-A receptor 3 OS=Homo sapiens OX=9606 GN=EPHA3 PE=1 SV=2	ENSG00000044524	EPHA3	0	0.823533	0.255105	0.282461	0.49858	0.160901	0.413967	-0.568428	0.160901	0.418212	-0.833362	-0.875582	0.371639	0.502504	0.912498	0.975516	-0.0422196	0.912498	0.975352
+pH fractionation/SP	High	P29350-4		Isoform 4 of Tyrosine-protein phosphatase non-receptor type 6 OS=Homo sapiens OX=9606 GN=PTPN6	ENSG00000111679	PTPN6	0	-1.82786	-3.71105	1.22735	3.64214	0.443866	0.677969	-1.88319	0.443866	0.674465	-5.99366	-4.35246	N.D.	N.D.	N.D.	NA	0.860831	0.309308	0.729551
+pH fractionation/SP	High	P29353-6		Isoform 6 of SHC-transforming protein 1 OS=Homo sapiens OX=9606 GN=SHC1	ENSG00000160691	SHC1	0	-1.26923	-2.00677	0.508663	1.89522	0.550555	0.750843	-0.737531	0.550555	0.747151	-4.65549	-3.2456	1.69011	0.489648	0.2375	0.67517	1.40989	0.2375	0.673334
+pH fractionation/SP	High	P29372		DNA-3-methyladenine glycosylase OS=Homo sapiens OX=9606 GN=MPG PE=1 SV=3	ENSG00000103152	MPG	0	-0.7225	-1.15703	0.436378	0.115706	0.170816	0.428914	-0.434535	0.170816	0.432999	1.33749	1.03089	0.562684	0.547931	0.536018	0.851474	-0.306602	0.536018	0.85148
+pH fractionation/SP	High	P29374		AT-rich interactive domain-containing protein 4A OS=Homo sapiens OX=9606 GN=ARID4A PE=1 SV=3	ENSG00000032219	ARID4A	0	-2.52927	-1.91516	0.501364	0.0876255	0.104846	0.33481	0.61411	0.104846	0.342992	0.91509	0.928765	0.119396	0.26873	0.939672	0.984423	0.0136747	0.939672	0.983694
+pH fractionation/SP	High	P29375		Lysine-specific demethylase 5A OS=Homo sapiens OX=9606 GN=KDM5A PE=1 SV=3	ENSG00000073614	KDM5A	0	-2.40917	-0.197371	0.257982	0.777234	0.0094618	0.117502	2.2118	0.0094618	0.116521	1.56477	1.67246	0.43824	0.316263	0.747379	0.923642	0.10769	0.747379	0.929892
+pH fractionation/SP	High	P29401-2		Isoform 2 of Transketolase OS=Homo sapiens OX=9606 GN=TKT	ENSG00000163931	TKT	0	7.01644	6.68362	0.21808	0.150061	0.094997	0.31927	-0.33282	0.094997	0.328387	5.51729	4.43794	1.07925	0.906485	0.255368	0.694935	-1.07934	0.255368	0.691098
+pH fractionation/SP	High	P29558		RNA-binding motif, single-stranded-interacting protein 1 OS=Homo sapiens OX=9606 GN=RBMS1 PE=1 SV=3	ENSG00000153250	RBMS1	0.002	-3.69574	-2.04323	0.589199	0.377207	0.01496	0.145837	1.65251	0.01496	0.148527	-1.43935	-0.644891	0.736907	1.21498	0.387696	0.77807	0.79446	0.387696	0.785356
+pH fractionation/SP	High	P29590		Protein PML OS=Homo sapiens OX=9606 GN=PML PE=1 SV=3	ENSG00000140464	PML	0	1.20911	1.13412	0.177112	0.347428	0.755829	0.874461	-0.0749833	0.755829	0.872097	4.18478	4.58917	0.418913	0.280727	0.237173	0.675064	0.404392	0.237173	0.67315
+pH fractionation/SP	High	P29590-8		Isoform PML-2 of Protein PML OS=Homo sapiens OX=9606 GN=PML	ENSG00000140464	PML	0	-6.81225		0.397282	N.D.	N.D.	NA	0.689106	0.0285955	0.190253	-2.65272	-2.14203	0.556298	0.45705	0.286569	0.709704	0.510692	0.286569	0.707834
+pH fractionation/SP	High	P29597		Non-receptor tyrosine-protein kinase TYK2 OS=Homo sapiens OX=9606 GN=TYK2 PE=1 SV=3	ENSG00000105397	TYK2	0.001	-4.04775	-3.13912	1.32778	1.11493	0.415371	0.658401	0.908629	0.415371	0.653144	-4.20122	-3.14241	2.17465	2.7713	0.630134	0.884853	1.0588	0.630134	0.890512
+pH fractionation/SP	High	P29692-2		Isoform 2 of Elongation factor 1-delta OS=Homo sapiens OX=9606 GN=EEF1D	ENSG00000104529	EEF1D	0	5.59718	4.83792	0.378849	0.154345	0.0324435	0.196508	-0.759261	0.0324435	0.203339	2.66669	3.51402	0.41277	0.25644	0.039158	0.387609	0.847327	0.039158	0.398028
+pH fractionation/SP	High	P29692-3		Isoform 3 of Elongation factor 1-delta OS=Homo sapiens OX=9606 GN=EEF1D	ENSG00000104529	EEF1D	0	-2.82744	-4.85898	0.953278	2.02957	0.19167	0.450009	-2.03154	0.19167	0.453546		-6.10025	N.D.	N.D.	N.D.	NA	0.356406	0.172025	0.613137
+pH fractionation/SP	High	P29728		2'-5'-oligoadenylate synthase 2 OS=Homo sapiens OX=9606 GN=OAS2 PE=1 SV=3	ENSG00000111335	OAS2	0.001	-3.92912	-1.58039	0.68874	0.55905	0.0101374	0.121194	2.34873	0.0101374	0.120496	-4.0848	-2.51145	N.D.	0.485211	N.D.	NA	2.13655	0.259602	0.692657
+pH fractionation/SP	High	P29965		CD40 ligand OS=Homo sapiens OX=9606 GN=CD40LG PE=1 SV=1	ENSG00000102245	CD40LG	0	-5.45137	-1.07085	0.592907	0.812173	0.00165283	0.0617868	4.38053	0.00165283	0.0624722	-6.54784	-2.2525	1.5652	0.575601	0.0111506	0.249391	4.29533	0.0111506	0.259106
+pH fractionation/SP	High	P30038		Delta-1-pyrroline-5-carboxylate dehydrogenase, mitochondrial OS=Homo sapiens OX=9606 GN=ALDH4A1 PE=1 SV=3	ENSG00000159423	ALDH4A1	0	-0.806712	0.162655	0.471746	0.359952	0.0473691	0.223026	0.969366	0.0473691	0.232726	-0.274578	-1.38595	1.15955	0.547252	0.207684	0.654007	-1.11137	0.207684	0.652339
+pH fractionation/SP	High	P30040		Endoplasmic reticulum resident protein 29 OS=Homo sapiens OX=9606 GN=ERP29 PE=1 SV=4	ENSG00000089248	ERP29	0	2.02545	2.38473	0.26199	0.413623	0.27263	0.535264	0.359272	0.27263	0.534541	-0.5583	-1.21496	0.627457	0.355707	0.189951	0.63335	-0.656659	0.189951	0.631936
+pH fractionation/SP	High	P30041		Peroxiredoxin-6 OS=Homo sapiens OX=9606 GN=PRDX6 PE=1 SV=3	ENSG00000117592	PRDX6	0	3.78509	4.12885	0.471032	0.701034	0.519721	0.732486	0.343751	0.519721	0.728064	1.02045	1.9264	0.762252	0.881342	0.249343	0.687993	0.905947	0.249343	0.686039
+pH fractionation/SP	High	P30042		ES1 protein homolog, mitochondrial OS=Homo sapiens OX=9606 GN=C21orf33 PE=1 SV=3	ENSG00000160221	C21orf33; LOC102724023	0	2.52431	1.88788	0.599251	0.508677	0.233442	0.494803	-0.636428	0.233442	0.497469	-0.970545	-0.465819	0.169553	0.246683	0.0432209	0.406207	0.504726	0.0432209	0.41687
+pH fractionation/SP	High	P30043		Flavin reductase (NADPH) OS=Homo sapiens OX=9606 GN=BLVRB PE=1 SV=3	ENSG00000090013	BLVRB	0	1.99254	2.22667	0.320996	0.237154	0.367036	0.620392	0.234135	0.367036	0.614833	0.248992	0.803991	0.148072	0.357997	0.0681152	0.460647	0.554999	0.0681152	0.467767
+pH fractionation/SP	High	P30044		Peroxiredoxin-5, mitochondrial OS=Homo sapiens OX=9606 GN=PRDX5 PE=1 SV=4	ENSG00000126432	PRDX5	0	2.83548	3.58781	0.291413	0.519017	0.0937766	0.316274	0.75233	0.0937766	0.325266	0.888409	1.19721	0.0235117	0.471144	0.320216	0.739654	0.3088	0.320216	0.741918
+pH fractionation/SP	High	P30046		D-dopachrome decarboxylase OS=Homo sapiens OX=9606 GN=DDT PE=1 SV=3	ENSG00000099977	DDT	0.001	-0.894751	-0.401032	1.42887	1.39523	0.690556	0.833788	0.493719	0.690556	0.83038	-3.91027	-4.81536	1.87633	1.72287	0.615526	0.880567	0.105946	0.95075	0.985207
+pH fractionation/SP	High	P30048		Thioredoxin-dependent peroxide reductase, mitochondrial OS=Homo sapiens OX=9606 GN=PRDX3 PE=1 SV=3	ENSG00000165672	PRDX3	0	4.19537	4.31631	0.477717	0.560634	0.790229	0.894241	0.120936	0.790229	0.892428	0.952895	1.67378	0.29084	0.190215	0.0229021	0.308365	0.720885	0.0229021	0.317832
+pH fractionation/SP	High	P30049		ATP synthase subunit delta, mitochondrial OS=Homo sapiens OX=9606 GN=ATP5F1D PE=1 SV=2	ENSG00000099624	ATP5D	0.001	3.03382	1.60493	0.423925	2.1163	0.315445	0.576776	-1.42889	0.315445	0.573178	0.706488	0.579002	0.878497	1.17422	0.887601	0.969804	-0.127485	0.887601	0.969051
+pH fractionation/SP	High	P30050		60S ribosomal protein L12 OS=Homo sapiens OX=9606 GN=RPL12 PE=1 SV=1	ENSG00000197958	RPL12	0	4.78742	4.40409	0.324149	0.150331	0.136692	0.381695	-0.383326	0.136692	0.387089	5.82856	5.06181	0.144727	0.203329	0.00600077	0.19683	-0.766746	0.00600077	0.202765
+pH fractionation/SP	High	P30084		Enoyl-CoA hydratase, mitochondrial OS=Homo sapiens OX=9606 GN=ECHS1 PE=1 SV=4	ENSG00000127884	ECHS1	0	2.53536	2.60145	0.0722955	0.170501	0.569966	0.764301	0.0660888	0.569966	0.760597	1.39397	1.23786	0.601152	0.260186	0.70092	0.911804	-0.156117	0.70092	0.918132
+pH fractionation/SP	High	P30085		UMP-CMP kinase OS=Homo sapiens OX=9606 GN=CMPK1 PE=1 SV=3		CMPK1	0	2.40003	2.14516	0.0791052	0.372228	0.310539	0.571553	-0.254877	0.310539	0.568345	3.46379	4.10505	3.66995	3.63404	0.840247	0.953105	0.641254	0.840247	0.956532
+pH fractionation/SP	High	P30086		Phosphatidylethanolamine-binding protein 1 OS=Homo sapiens OX=9606 GN=PEBP1 PE=1 SV=3	ENSG00000089220	PEBP1	0	4.97459	5.04879	0.258945	0.497062	0.82989	0.915202	0.0741953	0.82989	0.914307	1.75892	1.66085	0.815322	0.688955	0.881281	0.968367	-0.0980665	0.881281	0.968634
+pH fractionation/SP	High	P30101		Protein disulfide-isomerase A3 OS=Homo sapiens OX=9606 GN=PDIA3 PE=1 SV=4	ENSG00000167004	PDIA3	0	6.41674	6.72984	0.358016	0.368248	0.350571	0.606989	0.313098	0.350571	0.602272	3.87516	4.31099	0.443753	0.571288	0.35562	0.757873	0.435824	0.35562	0.759734
+pH fractionation/SP	High	P30153		Serine/threonine-protein phosphatase 2A 65 kDa regulatory subunit A alpha isoform OS=Homo sapiens OX=9606 GN=PPP2R1A PE=1 SV=4	ENSG00000105568	PPP2R1A	0	4.94216	4.5328	0.107577	0.216546	0.0427111	0.214942	-0.409366	0.0427111	0.223502	4.19256	3.92944	0.303234	0.283459	0.333896	0.74308	-0.263116	0.333896	0.745179
+pH fractionation/SP	High	P30154-2		Isoform 2 of Serine/threonine-protein phosphatase 2A 65 kDa regulatory subunit A beta isoform OS=Homo sapiens OX=9606 GN=PPP2R1B	ENSG00000137713	PPP2R1B	0	2.87313	2.06369	0.805241	0.471039	0.207303	0.47062	-0.80944	0.207303	0.473059	1.40488	1.50444	0.470093	0.556775	0.824569	0.950301	0.0995514	0.824569	0.953557
+pH fractionation/SP	High	P30260-2		Isoform 2 of Cell division cycle protein 27 homolog OS=Homo sapiens OX=9606 GN=CDC27	ENSG00000004897	CDC27	0	0.00699456	0.0924022	0.27193	0.0343783	0.618042	0.795264	0.0854077	0.618042	0.792747	3.464	3.56044	0.213778	0.285151	0.663692	0.899633	0.0964383	0.663692	0.905278
+pH fractionation/SP	High	P30405		Peptidyl-prolyl cis-trans isomerase F, mitochondrial OS=Homo sapiens OX=9606 GN=PPIF PE=1 SV=1	ENSG00000108179	PPIF	0	1.86363	0.631776	0.201364	0.90251	0.0822689	0.29639	-1.23185	0.0822689	0.306425	0.00371925	-0.568627	1.01224	1.2567	0.572217	0.866821	-0.572347	0.572217	0.868037
+pH fractionation/SP	High	P30414		NK-tumor recognition protein OS=Homo sapiens OX=9606 GN=NKTR PE=1 SV=2	ENSG00000114857	NKTR	0.001	-6.79976	-4.38476	0.231022	1.26737	0.0850098	0.300631	2.30453	0.036602	0.21352	-1.32015	-1.88534	0.347747	1.0482	0.425474	0.804624	-0.565187	0.425474	0.810874
+pH fractionation/SP	High	P30419		Glycylpeptide N-tetradecanoyltransferase 1 OS=Homo sapiens OX=9606 GN=NMT1 PE=1 SV=2	ENSG00000136448	NMT1	0	2.64655	3.01929	0.292352	0.123111	0.111545	0.345068	0.372745	0.111545	0.352171	3.74867	3.1966	0.39518	0.326757	0.135648	0.558795	-0.552068	0.135648	0.559897
+pH fractionation/SP	High	P30464		HLA class I histocompatibility antigen, B-15 alpha chain OS=Homo sapiens OX=9606 GN=HLA-B PE=1 SV=2	ENSG00000232126	HLA-B	0	-5.04812	-0.898186	1.18294	0.447071	0.00985985	0.120085	4.42298	0.00194312	0.0686524	-4.30992	-3.81307	4.51574	N.D.	N.D.	NA	-0.443942	0.849079	0.959804
+pH fractionation/SP	High	P30504		HLA class I histocompatibility antigen, Cw-4 alpha chain OS=Homo sapiens OX=9606 GN=HLA-C PE=1 SV=1		HLA-C	0	-0.638879	1.49211	0.338702	0.814128	0.0138525	0.139918	2.13099	0.0138525	0.142054	-4.79769	-2.60426	2.65893	1.45784	0.278499	0.70875	2.19343	0.278499	0.70557
+pH fractionation/SP	High	P30519		Heme oxygenase 2 OS=Homo sapiens OX=9606 GN=HMOX2 PE=1 SV=2	ENSG00000103415	HMOX2	0	1.48458	1.09379	0.333668	0.602033	0.381105	0.631365	-0.390786	0.381105	0.625168	0.0773783	0.133222	1.71575	1.00222	0.963509	0.989739	0.0558439	0.963509	0.988937
+pH fractionation/SP	High	P30520		Adenylosuccinate synthetase isozyme 2 OS=Homo sapiens OX=9606 GN=ADSS PE=1 SV=3	ENSG00000035687	ADSS	0	3.28615	2.42711	0.10197	0.163049	0.00150308	0.0614955	-0.859036	0.00150308	0.0620755	0.158666	-0.140005	0.0642533	0.187488	0.0594106	0.447085	-0.298671	0.0594106	0.45726
+pH fractionation/SP	High	P30533		Alpha-2-macroglobulin receptor-associated protein OS=Homo sapiens OX=9606 GN=LRPAP1 PE=1 SV=1	ENSG00000163956	LRPAP1	0	1.3954	0.179481	0.424989	0.310725	0.0161256	0.147226	-1.21592	0.0161256	0.151273	-2.3792	-1.96958	0.530004	1.16636	0.609218	0.877984	0.409621	0.609218	0.881126
+pH fractionation/SP	High	P30566		Adenylosuccinate lyase OS=Homo sapiens OX=9606 GN=ADSL PE=1 SV=2	ENSG00000239900	ADSL	0	3.19557	3.18469	0.406071	0.188678	0.968459	0.985895	-0.010876	0.968459	0.985189	0.608487	0.775083	0.420531	0.532273	0.692453	0.910988	0.166595	0.692453	0.917361
+pH fractionation/SP	High	P30613		Pyruvate kinase PKLR OS=Homo sapiens OX=9606 GN=PKLR PE=1 SV=2	ENSG00000143627	PKLR	0	-4.01122	-2.8273	N.D.	0.374941	N.D.	NA	2.56657	0.0250604	0.179841	-5.48351	-4.66923	0.813723	0.89809	0.309202	0.72768	0.814284	0.309202	0.729551
+pH fractionation/SP	High	P30622-2		Isoform 3 of CAP-Gly domain-containing linker protein 1 OS=Homo sapiens OX=9606 GN=CLIP1	ENSG00000130779	CLIP1	0	0.324042	-0.151129	0.604728	0.550703	0.371226	0.623413	-0.47517	0.371226	0.617899	-0.824436	-2.36645	1.38157	2.73235	0.432268	0.807458	-1.54201	0.432268	0.813496
+pH fractionation/SP	High	P30626		Sorcin OS=Homo sapiens OX=9606 GN=SRI PE=1 SV=1	ENSG00000075142	SRI	0	1.41405	1.61942	0.185673	0.415451	0.478075	0.706197	0.205371	0.478075	0.701444	0.586304	0.708135	0.580632	0.194982	0.747806	0.923679	0.121831	0.747806	0.929892
+pH fractionation/SP	High	P30679		Guanine nucleotide-binding protein subunit alpha-15 OS=Homo sapiens OX=9606 GN=GNA15 PE=1 SV=2		GNA15	0.002	-2.61722	-2.98346	0.418078	0.650018	0.457882	0.688026	-0.36623	0.457882	0.683218	-3.35633	-3.38901	0.113419	1.0744	0.960719	0.989458	-0.0326871	0.960719	0.988902
+pH fractionation/SP	High	P30825		High affinity cationic amino acid transporter 1 OS=Homo sapiens OX=9606 GN=SLC7A1 PE=1 SV=1	ENSG00000139514	SLC7A1	0	1.02001	-0.806179	0.186048	0.317785	0.00100923	0.0562816	-1.82619	0.00100923	0.0555947	-1.09815	0.574011	1.69591	1.07393	0.222541	0.667758	1.67216	0.222541	0.667399
+pH fractionation/SP	High	P30837		Aldehyde dehydrogenase X, mitochondrial OS=Homo sapiens OX=9606 GN=ALDH1B1 PE=1 SV=3		ALDH1B1	0	-1.08131	-1.76947	0.337915	0.309755	0.0600379	0.25193	-0.688159	0.0600379	0.262365	-3.35213	-3.4236	0.729533	0.968525	0.923601	0.980131	-0.071467	0.923601	0.979932
+pH fractionation/SP	High	P30876		DNA-directed RNA polymerase II subunit RPB2 OS=Homo sapiens OX=9606 GN=POLR2B PE=1 SV=1	ENSG00000047315	POLR2B	0	3.32923	3.35724	0.145531	0.0861337	0.78845	0.89353	0.0280099	0.78845	0.891662	4.82859	4.75397	0.0758581	0.12836	0.434929	0.809072	-0.0746208	0.434929	0.815188
+pH fractionation/SP	High	P31040		Succinate dehydrogenase [ubiquinone] flavoprotein subunit, mitochondrial OS=Homo sapiens OX=9606 GN=SDHA PE=1 SV=2	ENSG00000073578	SDHA	0	4.26654	3.75579	0.435141	0.357098	0.191149	0.449224	-0.510752	0.191149	0.452731	1.00992	1.78389	0.662364	0.206462	0.125498	0.5446	0.773966	0.125498	0.54796
+pH fractionation/SP	High	P31146		Coronin-1A OS=Homo sapiens OX=9606 GN=CORO1A PE=1 SV=4	ENSG00000102879	CORO1A	0	7.33198	8.31896	0.258608	0.521647	0.0425526	0.214369	0.986987	0.0425526	0.223146	6.21608	7.56824	0.586375	0.556331	0.0442296	0.407895	1.35216	0.0442296	0.41806
+pH fractionation/SP	High	P31150		Rab GDP dissociation inhibitor alpha OS=Homo sapiens OX=9606 GN=GDI1 PE=1 SV=2	ENSG00000203879	GDI1	0	2.97574	3.41552	0.0901684	0.0902177	0.00395007	0.0882978	0.439779	0.00395007	0.0876026	-0.138022	0.399121	0.272944	0.497157	0.176266	0.619235	0.537143	0.176266	0.618024
+pH fractionation/SP	High	P31153		S-adenosylmethionine synthase isoform type-2 OS=Homo sapiens OX=9606 GN=MAT2A PE=1 SV=1	ENSG00000168906	MAT2A	0	5.06596	3.64111	0.214466	0.357781	0.00408749	0.089293	-1.42484	0.00408749	0.0883553	2.33315	2.15575	0.196053	0.256949	0.395601	0.783777	-0.177397	0.395601	0.79071
+pH fractionation/SP	High	P31321		cAMP-dependent protein kinase type I-beta regulatory subunit OS=Homo sapiens OX=9606 GN=PRKAR1B PE=1 SV=4	ENSG00000188191	PRKAR1B	0	-1.5866	-3.56504	0.216522	0.582295	0.00527277	0.0953123	-1.97844	0.00527277	0.0942672	-3.6376	-4.94878	4.08727	0.133269	0.608255	0.877984	-1.31118	0.608255	0.881126
+pH fractionation/SP	High	P31323		cAMP-dependent protein kinase type II-beta regulatory subunit OS=Homo sapiens OX=9606 GN=PRKAR2B PE=1 SV=3	ENSG00000005249	PRKAR2B	0	-1.75773	-2.49505	0.321674	0.16413	0.0240916	0.172567	-0.737325	0.0240916	0.178367	1.08539	-0.962284	0.723276	0.820573	0.031601	0.350552	-2.04768	0.031601	0.362986
+pH fractionation/SP	High	P31327-3		Isoform 3 of Carbamoyl-phosphate synthase [ammonia], mitochondrial OS=Homo sapiens OX=9606 GN=CPS1	ENSG00000021826	CPS1	0.001	-6.03362	-5.50501	2.3623	3.03973	0.85107	0.928124	0.674012	0.753967	0.870733	-4.9571	-4.08636	1.32177	N.D.	N.D.	NA	-0.188113	0.866909	0.964006
+pH fractionation/SP	High	P31350-2		Isoform 2 of Ribonucleoside-diphosphate reductase subunit M2 OS=Homo sapiens OX=9606 GN=RRM2	ENSG00000171848	RRM2	0	3.47498	0.975725	0.127441	0.423941	0.00061284	0.0420758	-2.49925	0.00061284	0.0413103	-0.131062	-0.617967	0.109566	0.341246	0.0782538	0.47338	-0.486905	0.0782538	0.481621
+pH fractionation/SP	High	P31483		Nucleolysin TIA-1 isoform p40 OS=Homo sapiens OX=9606 GN=TIA1 PE=1 SV=3	ENSG00000116001	TIA1	0	-1.18018	-2.15058	0.594059	0.633607	0.125067	0.364728	-0.970405	0.125067	0.370143	-0.980982	-1.31074	0.882859	0.928792	0.678866	0.906152	-0.329756	0.678866	0.910839
+pH fractionation/SP	High	P31689		DnaJ homolog subfamily A member 1 OS=Homo sapiens OX=9606 GN=DNAJA1 PE=1 SV=2	ENSG00000086061	DNAJA1	0	4.66826	3.34538	0.238041	0.451147	0.0108901	0.125418	-1.32287	0.0108901	0.125298	3.86151	3.35046	0.291542	0.361039	0.129126	0.55062	-0.511046	0.129126	0.553565
+pH fractionation/SP	High	P31749		RAC-alpha serine/threonine-protein kinase OS=Homo sapiens OX=9606 GN=AKT1 PE=1 SV=2	ENSG00000142208	AKT1	0	-0.163522	0.0146475	0.231573	0.471151	0.588235	0.774518	0.178169	0.588235	0.771733	-3.38316	-2.79753	0.737816	0.935065	0.442415	0.812463	0.585634	0.442415	0.817048
+pH fractionation/SP	High	P31751		RAC-beta serine/threonine-protein kinase OS=Homo sapiens OX=9606 GN=AKT2 PE=1 SV=2	ENSG00000105221	AKT2	0	1.8776	1.68988	0.222028	0.476525	0.569731	0.764199	-0.187725	0.569731	0.760482	1.55537	0.878062	0.577808	0.672058	0.256206	0.695308	-0.677308	0.256206	0.691666
+pH fractionation/SP	High	P31785		Cytokine receptor common subunit gamma OS=Homo sapiens OX=9606 GN=IL2RG PE=1 SV=1	ENSG00000147168	IL2RG	0.002	-4.05543	-2.68096	0.549898	0.408041	0.0467182	0.222918	2.02126	0.0492292	0.236808	-7.44431	-6.3383	N.D.	N.D.	N.D.	NA	0.454726	0.202235	0.64592
+pH fractionation/SP	High	P31930		Cytochrome b-c1 complex subunit 1, mitochondrial OS=Homo sapiens OX=9606 GN=UQCRC1 PE=1 SV=3	ENSG00000010256	UQCRC1	0	4.13302	3.83217	0.0502091	0.258262	0.118728	0.356143	-0.300843	0.118728	0.361619	1.79996	1.45289	0.180352	0.326855	0.182626	0.62347	-0.347064	0.182626	0.622704
+pH fractionation/SP	High	P31937		3-hydroxyisobutyrate dehydrogenase, mitochondrial OS=Homo sapiens OX=9606 GN=HIBADH PE=1 SV=2	ENSG00000106049	HIBADH	0	-1.38664	-0.748529	0.28522	0.949845	0.327535	0.587906	0.638107	0.327535	0.583134	-1.79757	-1.97484	1.16905	0.540436	0.823283	0.949769	-0.177273	0.823283	0.952933
+pH fractionation/SP	High	P31939		Bifunctional purine biosynthesis protein PURH OS=Homo sapiens OX=9606 GN=ATIC PE=1 SV=3	ENSG00000138363	ATIC	0	5.83312	5.61662	0.172366	0.196525	0.22473	0.486816	-0.216505	0.22473	0.489815	3.53566	4.0326	0.0830235	0.209571	0.0188044	0.285456	0.496941	0.0188044	0.295506
+pH fractionation/SP	High	P31942		Heterogeneous nuclear ribonucleoprotein H3 OS=Homo sapiens OX=9606 GN=HNRNPH3 PE=1 SV=2	ENSG00000096746	HNRNPH3	0	2.11157	1.98986	0.202167	0.638514	0.768691	0.88114	-0.121706	0.768691	0.878906	6.96149	6.83299	0.26756	0.219511	0.555169	0.860655	-0.1285	0.555169	0.860036
+pH fractionation/SP	High	P31943		Heterogeneous nuclear ribonucleoprotein H OS=Homo sapiens OX=9606 GN=HNRNPH1 PE=1 SV=4	ENSG00000169045	HNRNPH1	0	5.55701	5.46602	0.0664	0.135094	0.354232	0.60818	-0.0909851	0.354232	0.603358	8.58238	8.47148	0.335967	0.102759	0.61364	0.880408	-0.110897	0.61364	0.884094
+pH fractionation/SP	High	P31944		Caspase-14 OS=Homo sapiens OX=9606 GN=CASP14 PE=1 SV=2	ENSG00000105141	CASP14	0.001	-2.99385	-2.84775	0.450208	0.628313	0.759788	0.876721	0.146105	0.759788	0.874462	-2.53271	-2.78461	2.14021	1.09469	0.864802	0.963032	-0.251902	0.864802	0.963493
+pH fractionation/SP	High	P31946		14-3-3 protein beta/alpha OS=Homo sapiens OX=9606 GN=YWHAB PE=1 SV=3	ENSG00000166913	YWHAB	0	4.30798	4.2484	0.53941	0.486916	0.89393	0.952116	-0.0595835	0.89393	0.950681	1.63059	2.02018	0.817371	0.634992	0.549996	0.857951	0.389595	0.549996	0.857623
+pH fractionation/SP	High	P31948		Stress-induced-phosphoprotein 1 OS=Homo sapiens OX=9606 GN=STIP1 PE=1 SV=1	ENSG00000168439	STIP1	0	7.10066	6.61274	0.354339	0.28359	0.136069	0.381309	-0.487927	0.136069	0.386622	4.84514	4.93427	0.206336	0.145456	0.573875	0.8669	0.0891378	0.573875	0.868296
+pH fractionation/SP	High	P31949		Protein S100-A11 OS=Homo sapiens OX=9606 GN=S100A11 PE=1 SV=2	ENSG00000163191	S100A11	0.004	-4.85558	-6.01819	0.329704	2.95974	0.514941	0.7296	-1.16931	0.393247	0.636727	-5.01485	-6.75764	0.605979	1.00583	0.0875201	0.485872	-1.66451	0.037897	0.394258
+pH fractionation/SP	High	P32119		Peroxiredoxin-2 OS=Homo sapiens OX=9606 GN=PRDX2 PE=1 SV=5	ENSG00000167815	PRDX2	0	6.32616	6.12559	0.285239	0.307945	0.454415	0.68655	-0.200563	0.454415	0.681688	3.52189	3.77765	0.170801	0.61765	0.527413	0.847654	0.255764	0.527413	0.848065
+pH fractionation/SP	High	P32121-4		Isoform 4 of Beta-arrestin-2 OS=Homo sapiens OX=9606 GN=ARRB2	ENSG00000141480	ARRB2	0	0.411595	-0.137249	0.510747	0.448982	0.23468	0.495459	-0.548844	0.23468	0.498166	0.444012	0.236458	0.275642	0.18708	0.341256	0.746855	-0.207554	0.341256	0.749401
+pH fractionation/SP	High	P32189		Glycerol kinase OS=Homo sapiens OX=9606 GN=GK PE=1 SV=3	ENSG00000198814	GK	0.006	-6.07549	-5.38126	2.39697	N.D.	N.D.	NA	0.264975	0.859144	0.931247	-5.37768	-6.77984	N.D.	N.D.	N.D.	NA	-0.215084	0.709605	0.919866
+pH fractionation/SP	High	P32242		Homeobox protein OTX1 OS=Homo sapiens OX=9606 GN=OTX1 PE=1 SV=1	ENSG00000115507	OTX1	0.007			N.D.	N.D.	N.D.	NA	0.142661	0.446835	0.676059	-2.83609	-4.79235	N.D.	1.51927	N.D.	NA	0.141228	0.933658	0.981703
+pH fractionation/SP	High	P32249		G-protein coupled receptor 183 OS=Homo sapiens OX=9606 GN=GPR183 PE=1 SV=3	ENSG00000169508	GPR183	0.002	-4.56947	-3.98164	1.66018	1.19245	0.669577	0.822917	1.2484	0.346213	0.60022	-5.70525	-4.63697	1.40733	1.49184	0.417966	0.797826	1.06828	0.417966	0.805886
+pH fractionation/SP	High	P32321-2		Isoform 2 of Deoxycytidylate deaminase OS=Homo sapiens OX=9606 GN=DCTD	ENSG00000129187	DCTD	0	-0.0548902	0.53215	0.234211	0.24125	0.0390099	0.210201	0.58704	0.0390099	0.218878	-2.93934	-2.48407	1.00292	1.94417	0.736729	0.921826	0.455272	0.736729	0.928478
+pH fractionation/SP	High	P32322-3		Isoform 3 of Pyrroline-5-carboxylate reductase 1, mitochondrial OS=Homo sapiens OX=9606 GN=PYCR1	ENSG00000183010	PYCR1	0	1.71217	0.00922145	0.305698	1.27484	0.0876535	0.304821	-1.70294	0.0876535	0.31446	-0.365551	-0.739046	0.702111	0.690867	0.547204	0.857132	-0.373495	0.547204	0.857139
+pH fractionation/SP	High	P32455		Guanylate-binding protein 1 OS=Homo sapiens OX=9606 GN=GBP1 PE=1 SV=2	ENSG00000117228	GBP1	0	2.57297	4.69971	0.297743	0.924592	0.0192312	0.155525	2.12674	0.0192312	0.160931	0.742296	2.15886	0.168258	0.930589	0.0603967	0.449878	1.41657	0.0603967	0.459751
+pH fractionation/SP	High	P32456		Guanylate-binding protein 2 OS=Homo sapiens OX=9606 GN=GBP2 PE=1 SV=3	ENSG00000162645	GBP2	0	0.422645	3.44305	0.882692	0.424981	0.00592508	0.0999156	3.0204	0.00592508	0.0988736	-0.651673	0.20996	1.52468	0.134147	0.384743	0.7769	0.861632	0.384743	0.78254
+pH fractionation/SP	High	P32519		ETS-related transcription factor Elf-1 OS=Homo sapiens OX=9606 GN=ELF1 PE=1 SV=2	ENSG00000120690	ELF1	0	-2.74183	-2.16479	1.19465	1.34725	0.608433	0.787691	0.577033	0.608433	0.784897	-0.129467	0.585769	0.322668	0.340396	0.0575033	0.44143	0.715236	0.0575033	0.451249
+pH fractionation/SP	High	P32780		General transcription factor IIH subunit 1 OS=Homo sapiens OX=9606 GN=GTF2H1 PE=1 SV=1	ENSG00000110768	GTF2H1	0.001	-3.71065	-3.22258	2.00965	1.31852	0.7428	0.86543	0.488073	0.7428	0.863091	-1.23682	-1.67983	0.559077	0.916593	0.514298	0.839936	-0.44301	0.514298	0.84043
+pH fractionation/SP	High	P32929		Cystathionine gamma-lyase OS=Homo sapiens OX=9606 GN=CTH PE=1 SV=3	ENSG00000116761	CTH	0	-1.60556	-1.34277	0.35637	0.668115	0.580175	0.770467	0.262789	0.580175	0.767822	-0.889861	-2.74969	1.30412	2.16552	0.271552	0.703384	-1.85983	0.271552	0.69926
+pH fractionation/SP	High	P32942		Intercellular adhesion molecule 3 OS=Homo sapiens OX=9606 GN=ICAM3 PE=1 SV=2	ENSG00000076662	ICAM3	0	1.32926	1.78396	0.107231	0.25601	0.0469909	0.223026	0.454693	0.0469909	0.232548	-0.440934	-1.13111	0.302816	0.321955	0.0538353	0.42847	-0.690172	0.0538353	0.437775
+pH fractionation/SP	High	P32969		60S ribosomal protein L9 OS=Homo sapiens OX=9606 GN=RPL9 PE=1 SV=1	ENSG00000163682	RPL9	0	3.42898	3.03077	0.49765	0.59426	0.423839	0.664779	-0.39821	0.423839	0.659914	4.53387	3.89162	0.285538	0.317489	0.059722	0.448264	-0.642254	0.059722	0.457886
+pH fractionation/SP	High	P33176		Kinesin-1 heavy chain OS=Homo sapiens OX=9606 GN=KIF5B PE=1 SV=1	ENSG00000170759	KIF5B	0	4.54302	4.38469	0.0519972	0.210072	0.273837	0.536429	-0.158331	0.273837	0.535378	5.03468	5.03602	1.83098	2.29788	0.999409	0.999797	0.001337	0.999409	0.999828
+pH fractionation/SP	High	P33240		Cleavage stimulation factor subunit 2 OS=Homo sapiens OX=9606 GN=CSTF2 PE=1 SV=1	ENSG00000101811	CSTF2	0	-1.24482	-0.772595	0.218526	0.746022	0.352085	0.607584	0.472227	0.352085	0.602851	1.43605	1.43674	0.615747	0.475186	0.998854	0.999797	0.000686142	0.998854	0.999828
+pH fractionation/SP	High	P33316		Deoxyuridine 5'-triphosphate nucleotidohydrolase, mitochondrial OS=Homo sapiens OX=9606 GN=DUT PE=1 SV=4	ENSG00000128951	DUT	0	4.35999	2.49491	0.149394	0.511133	0.00372915	0.0861648	-1.86508	0.00372915	0.0864453	0.574533	0.178317	0.182146	0.352941	0.159075	0.592454	-0.396216	0.159075	0.592686
+pH fractionation/SP	High	P33527-9		Isoform 9 of Multidrug resistance-associated protein 1 OS=Homo sapiens OX=9606 GN=ABCC1		ABCC1	0	0.311467	0.18912	0.0962667	0.40147	0.634799	0.802854	-0.122347	0.634799	0.80061	-0.954354	-0.542171	0.517864	0.623826	0.428289	0.805294	0.412182	0.428289	0.810874
+pH fractionation/SP	High	P33552		Cyclin-dependent kinases regulatory subunit 2 OS=Homo sapiens OX=9606 GN=CKS2 PE=1 SV=1	ENSG00000123975	CKS2	0.001	-1.13041	-3.16113	0.557155	0.523347	0.0100206	0.120699	-2.03072	0.0100206	0.119943	-2.82732	-3.80228	0.314666	1.57747	0.353043	0.755128	-0.974958	0.353043	0.756795
+pH fractionation/SP	High	P33991		DNA replication licensing factor MCM4 OS=Homo sapiens OX=9606 GN=MCM4 PE=1 SV=5	ENSG00000104738	MCM4	0	5.47503	4.50526	0.252783	0.159224	0.00492057	0.0952617	-0.969767	0.00492057	0.0937052	5.8664	4.30718	0.164626	0.144269	0.000247994	0.0523944	-1.55922	0.000247994	0.0488644
+pH fractionation/SP	High	P33992		DNA replication licensing factor MCM5 OS=Homo sapiens OX=9606 GN=MCM5 PE=1 SV=5	ENSG00000100297	MCM5	0	4.87907	4.10551	0.040458	0.373633	0.0234777	0.170926	-0.773556	0.0234777	0.176606	6.23282	4.66498	0.1538	0.263284	0.000878539	0.102086	-1.56785	0.000878539	0.101893
+pH fractionation/SP	High	P33993		DNA replication licensing factor MCM7 OS=Homo sapiens OX=9606 GN=MCM7 PE=1 SV=4	ENSG00000166508	MCM7	0	5.35416	4.21959	0.136727	0.634149	0.0388098	0.210201	-1.13457	0.0388098	0.218727	6.24299	4.80073	0.230662	0.237155	0.00164817	0.129653	-1.44226	0.00164817	0.127973
+pH fractionation/SP	High	P34896		Serine hydroxymethyltransferase, cytosolic OS=Homo sapiens OX=9606 GN=SHMT1 PE=1 SV=1	ENSG00000176974	SHMT1	0	3.01002	2.09379	0.67224	0.525671	0.136457	0.381427	-0.91623	0.136457	0.386797	0.0408614	0.242156	0.355495	0.718933	0.686193	0.908613	0.201295	0.686193	0.914474
+pH fractionation/SP	High	P34897		Serine hydroxymethyltransferase, mitochondrial OS=Homo sapiens OX=9606 GN=SHMT2 PE=1 SV=3	ENSG00000182199	SHMT2	0	5.43985	5.44939	0.0864942	0.0628185	0.884599	0.946227	0.00954368	0.884599	0.944332	4.19463	4.34164	0.200056	0.15659	0.37295	0.771804	0.147003	0.37295	0.7751
+pH fractionation/SP	High	P34913		Bifunctional epoxide hydrolase 2 OS=Homo sapiens OX=9606 GN=EPHX2 PE=1 SV=2	ENSG00000120915	EPHX2	0	-0.0344826	-0.238349	0.438468	0.494616	0.621503	0.796731	-0.203866	0.621503	0.794401	0.674686	0.174165	0.161132	0.0522219	0.00689497	0.209063	-0.500521	0.00689497	0.21377
+pH fractionation/SP	High	P34932		Heat shock 70 kDa protein 4 OS=Homo sapiens OX=9606 GN=HSPA4 PE=1 SV=4	ENSG00000170606	HSPA4	0	6.86129	6.3973	0.270665	0.111477	0.0516159	0.232499	-0.463988	0.0516159	0.242828	5.44341	4.87398	0.753446	0.537233	0.346559	0.751865	-0.569432	0.346559	0.754214
+pH fractionation/SP	High	P34949		Mannose-6-phosphate isomerase OS=Homo sapiens OX=9606 GN=MPI PE=1 SV=2	ENSG00000178802	MPI	0	-0.681106	-0.674436	0.668556	0.65333	0.99073	0.995286	0.00667056	0.99073	0.994613	-4.65262	-3.39815	2.11486	0.356623	0.368317	0.769111	1.25446	0.368317	0.772728
+pH fractionation/SP	High	P35080		Profilin-2 OS=Homo sapiens OX=9606 GN=PFN2 PE=1 SV=3	ENSG00000070087	PFN2	0	2.17844	0.481827	0.475026	1.20701	0.0861558	0.302813	-1.69662	0.0861558	0.312065	0.484143	-1.17124	1.19858	4.91618	0.601254	0.877278	-1.65538	0.601254	0.879726
+pH fractionation/SP	High	P35080-2		Isoform IIb of Profilin-2 OS=Homo sapiens OX=9606 GN=PFN2	ENSG00000070087	PFN2	0	-2.46713	-5.46698	1.44866	1.02492	0.0429003	0.21508	-2.99985	0.0429003	0.223668	-5.31114	-3.47819	1.06473	N.D.	N.D.	NA	0.291917	0.817381	0.951371
+pH fractionation/SP	High	P35219		Carbonic anhydrase-related protein OS=Homo sapiens OX=9606 GN=CA8 PE=1 SV=3	ENSG00000178538	CA8	0	-1.30147	-0.571685	1.41435	0.67541	0.465184	0.694925	0.729787	0.465184	0.689748	1.39428	-0.412057	0.537267	1.10698	0.0638008	0.455678	-1.80634	0.0638008	0.461811
+pH fractionation/SP	High	P35221-2		Isoform 2 of Catenin alpha-1 OS=Homo sapiens OX=9606 GN=CTNNA1		CTNNA1	0	0.134146	0.152435	0.124945	0.366217	0.938685	0.972805	0.0182893	0.938685	0.972512	-0.586432	-1.53873	0.458593	0.538371	0.0800509	0.473801	-0.952298	0.0800509	0.482333
+pH fractionation/SP	High	P35222		Catenin beta-1 OS=Homo sapiens OX=9606 GN=CTNNB1 PE=1 SV=1	ENSG00000168036	CTNNB1	0.004	-5.05446	-4.73345	2.15372	1.08912	0.829102	0.914543	0.321008	0.829102	0.913635	-4.63954	-5.75411	2.24566	N.D.	N.D.	NA	-1.63478	0.284171	0.707762
+pH fractionation/SP	High	P35226		Polycomb complex protein BMI-1 OS=Homo sapiens OX=9606 GN=BMI1 PE=1 SV=2	ENSG00000168283	BMI1; COMMD3-BMI1	0	-3.39841	-2.98878	1.16839	0.176046	0.580562	0.770754	0.409626	0.580562	0.767937	2.30785	2.44672	0.448456	0.468448	0.729519	0.921746	0.13887	0.729519	0.926698
+pH fractionation/SP	High	P35227		Polycomb group RING finger protein 2 OS=Homo sapiens OX=9606 GN=PCGF2 PE=1 SV=1	ENSG00000278644	PCGF2	0.001	-6.22817	-5.92187	N.D.	N.D.	N.D.	NA	0.22016	0.09137	0.321078	-1.88535	-0.887188	0.916135	0.813305	0.231005	0.667758	0.998167	0.231005	0.667399
+pH fractionation/SP	High	P35232		Prohibitin OS=Homo sapiens OX=9606 GN=PHB PE=1 SV=1	ENSG00000167085	PHB	0	4.46997	4.44215	0.0114253	0.185191	0.807863	0.902704	-0.0278277	0.807863	0.900692	2.09675	2.06432	0.414941	0.212848	0.90993	0.975231	-0.0324324	0.90993	0.974749
+pH fractionation/SP	High	P35236-3		Isoform 3 of Tyrosine-protein phosphatase non-receptor type 7 OS=Homo sapiens OX=9606 GN=PTPN7	ENSG00000143851	PTPN7	0	0.209536	0.8431	0.992613	1.01406	0.482487	0.709176	0.633564	0.482487	0.70391	-0.0520366	-0.172491	0.990495	1.47499	0.912182	0.975516	-0.120454	0.912182	0.975352
+pH fractionation/SP	High	P35241-5		Isoform 5 of Radixin OS=Homo sapiens OX=9606 GN=RDX	ENSG00000137710	RDX	0	-1.62106	-1.42801	0.251323	0.429987	0.538767	0.743953	0.19305	0.538767	0.739974	-4.58051	-5.60409	0.335292	0.154821	0.0300516	0.341295	-1.27861	0.0172801	0.289366
+pH fractionation/SP	High	P35244		Replication protein A 14 kDa subunit OS=Homo sapiens OX=9606 GN=RPA3 PE=1 SV=1	ENSG00000106399	RPA3	0	0.460762	1.10499	0.26254	0.241474	0.0352473	0.203115	0.644223	0.0352473	0.210702	0.0400704	-0.13075	0.190751	0.652263	0.685756	0.908613	-0.170821	0.685756	0.914401
+pH fractionation/SP	High	P35249		Replication factor C subunit 4 OS=Homo sapiens OX=9606 GN=RFC4 PE=1 SV=2	ENSG00000163918	RFC4	0	2.05674	2.05956	0.0748455	0.606353	0.994012	0.997332	0.00281621	0.994012	0.997126	3.06239	2.37575	0.571937	0.728211	0.268346	0.701956	-0.686639	0.268346	0.696636
+pH fractionation/SP	High	P35250		Replication factor C subunit 2 OS=Homo sapiens OX=9606 GN=RFC2 PE=1 SV=3	ENSG00000049541	RFC2	0	2.13008	2.33036	0.581146	0.337876	0.633038	0.801891	0.200283	0.633038	0.799595	3.488	2.75661	0.569692	0.58903	0.197021	0.641887	-0.731393	0.197021	0.641902
+pH fractionation/SP	High	P35251		Replication factor C subunit 1 OS=Homo sapiens OX=9606 GN=RFC1 PE=1 SV=4	ENSG00000035928	RFC1	0	1.08195	0.883279	0.462436	0.481039	0.633256	0.801891	-0.198673	0.633256	0.799595	3.83514	2.90204	0.434432	0.337693	0.0425068	0.401568	-0.933105	0.0425068	0.411649
+pH fractionation/SP	High	P35268		60S ribosomal protein L22 OS=Homo sapiens OX=9606 GN=RPL22 PE=1 SV=2	ENSG00000116251	RPL22	0	3.96642	4.00997	0.0940962	0.466064	0.881655	0.945178	0.0435429	0.881655	0.943538	6.07664	5.27573	0.477846	0.608413	0.147412	0.574369	-0.800913	0.147412	0.574992
+pH fractionation/SP	High	P35269		General transcription factor IIF subunit 1 OS=Homo sapiens OX=9606 GN=GTF2F1 PE=1 SV=2	ENSG00000125651	GTF2F1	0	1.05077	-0.244893	0.13578	0.637663	0.0262413	0.178379	-1.29567	0.0262413	0.183904	-0.974875	-0.735266	0.555302	0.441052	0.589815	0.871503	0.239609	0.589815	0.873267
+pH fractionation/SP	High	P35270		Sepiapterin reductase OS=Homo sapiens OX=9606 GN=SPR PE=1 SV=1	ENSG00000116096	SPR	0	0.412064	0.0858308	0.276347	0.478164	0.364083	0.618727	-0.326233	0.364083	0.613552	-1.36448	-1.46177	0.922082	0.646674	0.888308	0.969804	-0.0972864	0.888308	0.969051
+pH fractionation/SP	High	P35520-2		Isoform 2 of Cystathionine beta-synthase OS=Homo sapiens OX=9606 GN=CBS	ENSG00000274276	CBS; LOC102724560; CBSL	0.008	-2.64368		0.24896	N.D.	N.D.	NA	-2.33212	0.10302	0.340088	-1.1887	-3.43096	N.D.	2.70231	N.D.	NA	0.521477	0.838003	0.956414
+pH fractionation/SP	High	P35527		Keratin, type I cytoskeletal 9 OS=Homo sapiens OX=9606 GN=KRT9 PE=1 SV=3	ENSG00000171403	KRT9	0	6.85366	6.31929	0.572789	0.496831	0.289248	0.551857	-0.534369	0.289248	0.550658	6.29205	7.31432	0.71961	0.448207	0.105004	0.51538	1.02227	0.105004	0.520254
+pH fractionation/SP	High	P35573		Glycogen debranching enzyme OS=Homo sapiens OX=9606 GN=AGL PE=1 SV=3	ENSG00000162688	AGL	0	2.34656	2.86874	0.184183	0.192314	0.027364	0.181832	0.522187	0.027364	0.188208	2.33749	2.29557	0.285876	0.37451	0.884988	0.969804	-0.04192	0.884988	0.969051
+pH fractionation/SP	High	P35579		Myosin-9 OS=Homo sapiens OX=9606 GN=MYH9 PE=1 SV=4	ENSG00000100345	MYH9	0	7.88294	8.5411	0.165211	0.487848	0.091296	0.311724	0.658156	0.091296	0.321078	5.87084	6.59096	0.436675	0.137196	0.0527143	0.425695	0.720121	0.0527143	0.435253
+pH fractionation/SP	High	P35580-3		Isoform 3 of Myosin-10 OS=Homo sapiens OX=9606 GN=MYH10		MYH10	0	5.3576	4.68558	0.0914506	0.544644	0.102768	0.332088	-0.672013	0.102768	0.340088	3.57071	3.64609	0.691356	0.606764	0.893992	0.97137	0.0753798	0.893992	0.970211
+pH fractionation/SP	High	P35606		Coatomer subunit beta' OS=Homo sapiens OX=9606 GN=COPB2 PE=1 SV=2	ENSG00000184432	COPB2	0	4.23067	4.85643	0.12925	0.647648	0.176109	0.436102	0.625762	0.176109	0.440591	2.27213	2.94211	0.12725	0.464357	0.0735426	0.466975	0.669976	0.0735426	0.473315
+pH fractionation/SP	High	P35610		Sterol O-acyltransferase 1 OS=Homo sapiens OX=9606 GN=SOAT1 PE=1 SV=3	ENSG00000057252	SOAT1	0	0.0360638	0.859368	0.385834	0.942647	0.234093	0.494803	0.823304	0.234093	0.497469	-2.17081	-1.71627	0.177859	0.682785	0.327002	0.742964	0.454546	0.327002	0.743982
+pH fractionation/SP	High	P35611-3		Isoform 3 of Alpha-adducin OS=Homo sapiens OX=9606 GN=ADD1	ENSG00000087274	ADD1	0	1.7892	1.10371	0.359737	0.314043	0.0677475	0.266584	-0.685494	0.0677475	0.278247	0.787408	-0.207166	0.287233	0.0667196	0.00428086	0.183296	-0.994574	0.00428086	0.189059
+pH fractionation/SP	High	P35612		Beta-adducin OS=Homo sapiens OX=9606 GN=ADD2 PE=1 SV=3	ENSG00000075340	ADD2	0	0.140292	0.418965	0.646756	0.643877	0.624869	0.798518	0.278673	0.624869	0.796575	-1.20356	-2.09605	0.332904	1.30487	0.314994	0.734249	-0.892493	0.314994	0.73652
+pH fractionation/SP	High	P35613		Basigin OS=Homo sapiens OX=9606 GN=BSG PE=1 SV=2	ENSG00000172270	BSG	0	3.68681	3.06833	0.16764	0.604111	0.162693	0.416348	-0.618479	0.162693	0.42031	1.88024	1.97163	0.624935	0.538777	0.857204	0.959776	0.0913948	0.857204	0.960471
+pH fractionation/SP	High	P35626		Beta-adrenergic receptor kinase 2 OS=Homo sapiens OX=9606 GN=GRK3 PE=1 SV=2	ENSG00000100077	ADRBK2; GRK3	0	-4.28404		0.294289	N.D.	N.D.	NA	-1.18586	0.0915447	0.321078	-6.06795		N.D.	N.D.	N.D.	NA	-0.112651	0.590698	0.873267
+pH fractionation/SP	High	P35637		RNA-binding protein FUS OS=Homo sapiens OX=9606 GN=FUS PE=1 SV=1	ENSG00000089280	FUS	0	3.72519	3.46938	0.562167	0.503293	0.58861	0.774518	-0.255809	0.58861	0.771733	5.39278	4.97839	0.386327	0.741143	0.438889	0.810068	-0.414388	0.438889	0.815188
+pH fractionation/SP	High	P35658		Nuclear pore complex protein Nup214 OS=Homo sapiens OX=9606 GN=NUP214 PE=1 SV=2	ENSG00000126883	NUP214	0	-1.1122	0.262577	0.511863	0.228255	0.0131716	0.137758	1.37478	0.0131716	0.139322	4.1177	3.55401	0.230873	0.246052	0.0443996	0.408652	-0.563691	0.0443996	0.418894
+pH fractionation/SP	High	P35659		Protein DEK OS=Homo sapiens OX=9606 GN=DEK PE=1 SV=1	ENSG00000124795	DEK	0	2.51787	2.26085	1.97696	2.30515	0.890546	0.950892	-0.257017	0.890546	0.948891	5.68489	5.32559	0.36459	0.412067	0.321236	0.739654	-0.359304	0.321236	0.741918
+pH fractionation/SP	High	P35754		Glutaredoxin-1 OS=Homo sapiens OX=9606 GN=GLRX PE=1 SV=2	ENSG00000173221	GLRX	0.006	-0.00421302	0.0443549	0.583618	0.349712	0.907563	0.959438	0.048568	0.907563	0.95784	-2.40724	-2.16949	0.77379	0.637962	0.702387	0.911914	0.237759	0.702387	0.918698
+pH fractionation/SP	High	P35813-3		Isoform 3 of Protein phosphatase 1A OS=Homo sapiens OX=9606 GN=PPM1A	ENSG00000100614	PPM1A	0	1.59432	1.82508	0.0445123	0.400806	0.377732	0.628387	0.23076	0.377732	0.622236	-0.54879	0.199874	0.239649	0.374728	0.0434491	0.406207	0.748664	0.0434491	0.41687
+pH fractionation/SP	High	P35908		Keratin, type II cytoskeletal 2 epidermal OS=Homo sapiens OX=9606 GN=KRT2 PE=1 SV=2	ENSG00000172867	KRT2	0	6.80476	6.42787	1.02389	0.496911	0.596961	0.780466	-0.376888	0.596961	0.777582	7.19923	7.98002	0.211174	0.568202	0.0895143	0.487136	0.780785	0.0895143	0.493352
+pH fractionation/SP	High	P35914		Hydroxymethylglutaryl-CoA lyase, mitochondrial OS=Homo sapiens OX=9606 GN=HMGCL PE=1 SV=2	ENSG00000117305	HMGCL	0	-1.89027	-0.631556	0.343867	0.415736	0.015592	0.147226	1.25872	0.015592	0.150146	-3.68802	-2.17394	0.0608051	0.602217	0.0123239	0.249391	1.51408	0.0123239	0.259106
+pH fractionation/SP	High	P35998		26S proteasome regulatory subunit 7 OS=Homo sapiens OX=9606 GN=PSMC2 PE=1 SV=3	ENSG00000161057	PSMC2	0	4.63408	4.46336	0.23695	0.343081	0.517351	0.731754	-0.170724	0.517351	0.727162	2.49478	2.87319	0.0304459	0.510766	0.269444	0.702399	0.378404	0.269444	0.696802
+pH fractionation/SP	High	P36402-3		Isoform 1L of Transcription factor 7 OS=Homo sapiens OX=9606 GN=TCF7		TCF7	0	-4.11394	-4.30361	0.644418	1.16197	0.816883	0.907267	-0.189675	0.816883	0.905005	-2.07392	-4.75128	1.218	N.D.	N.D.	NA	-3.82254	0.0136056	0.267055
+pH fractionation/SP	High	P36404		ADP-ribosylation factor-like protein 2 OS=Homo sapiens OX=9606 GN=ARL2 PE=1 SV=4	ENSG00000213465	ARL2	0	-0.0242404	-0.218949	0.321718	0.351391	0.518093	0.732038	-0.194708	0.518093	0.727517	-1.69405	-1.3351	0.519368	0.617423	0.483941	0.83171	0.358952	0.483941	0.833616
+pH fractionation/SP	High	P36405		ADP-ribosylation factor-like protein 3 OS=Homo sapiens OX=9606 GN=ARL3 PE=1 SV=2	ENSG00000138175	ARL3	0	0.453828	0.0576311	0.154279	0.344824	0.143448	0.390823	-0.396197	0.143448	0.396165	-1.7065	-2.43965	0.558433	1.38549	0.443167	0.813523	-0.73315	0.443167	0.817848
+pH fractionation/SP	High	P36507		Dual specificity mitogen-activated protein kinase kinase 2 OS=Homo sapiens OX=9606 GN=MAP2K2 PE=1 SV=1	ENSG00000126934	MAP2K2	0	2.52821	2.57318	0.0963416	0.224037	0.765435	0.880071	0.0449665	0.765435	0.877258	1.74751	1.60703	0.497155	0.653065	0.781644	0.936383	-0.140477	0.781644	0.940755
+pH fractionation/SP	High	P36508		Zinc finger protein 76 OS=Homo sapiens OX=9606 GN=ZNF76 PE=1 SV=2	ENSG00000065029	ZNF76	0.002	-7.4518	-6.4749	1.7123	0.923883	0.433561	0.671672	0.976901	0.433561	0.666768	-4.50949	-4.96972	1.56509	1.59617	0.76996	0.934993	-0.941936	0.481043	0.833616
+pH fractionation/SP	High	P36542		ATP synthase subunit gamma, mitochondrial OS=Homo sapiens OX=9606 GN=ATP5F1C PE=1 SV=1	ENSG00000165629	ATP5C1	0	4.75013	4.46078	0.113558	0.222344	0.115147	0.350695	-0.289347	0.115147	0.357297	2.92872	2.71268	1.06819	0.322559	0.754205	0.926604	-0.216046	0.754205	0.931495
+pH fractionation/SP	High	P36543		V-type proton ATPase subunit E 1 OS=Homo sapiens OX=9606 GN=ATP6V1E1 PE=1 SV=1	ENSG00000131100	ATP6V1E1	0	1.79778	1.59776	0.417202	0.407564	0.584464	0.772006	-0.200026	0.584464	0.769235	-0.208122	0.623392	1.06767	0.447053	0.281332	0.709002	0.831514	0.281332	0.70676
+pH fractionation/SP	High	P36551		Oxygen-dependent coproporphyrinogen-III oxidase, mitochondrial OS=Homo sapiens OX=9606 GN=CPOX PE=1 SV=3	ENSG00000080819	CPOX	0	0.837721	0.259822	0.30673	0.302878	0.080956	0.29342	-0.577899	0.080956	0.303615	-1.8055	-2.16646	2.1261	1.06235	0.805509	0.942321	-0.360954	0.805509	0.945683
+pH fractionation/SP	High	P36578		60S ribosomal protein L4 OS=Homo sapiens OX=9606 GN=RPL4 PE=1 SV=5	ENSG00000174444	RPL4	0	6.16631	5.99913	0.239361	0.248561	0.448629	0.681666	-0.167175	0.448629	0.677772	8.05831	7.42687	0.368344	0.441624	0.129966	0.551408	-0.63144	0.129966	0.554112
+pH fractionation/SP	High	P36639		7,8-dihydro-8-oxoguanine triphosphatase OS=Homo sapiens OX=9606 GN=NUDT1 PE=1 SV=3		NUDT1	0	2.43234	1.08275	0.123189	0.471319	0.00865822	0.112897	-1.34959	0.00865822	0.111575	-0.0829656	0.308302	1.271	0.588978	0.653834	0.892779	0.391267	0.653834	0.899461
+pH fractionation/SP	High	P36776		Lon protease homolog, mitochondrial OS=Homo sapiens OX=9606 GN=LONP1 PE=1 SV=2	ENSG00000196365	LONP1	0	4.35314	3.32084	0.2141	0.217578	0.00423953	0.0900454	-1.0323	0.00423953	0.0889328	4.5683	4.27052	0.368797	0.324789	0.353162	0.755128	-0.297776	0.353162	0.756795
+pH fractionation/SP	High	P36871		Phosphoglucomutase-1 OS=Homo sapiens OX=9606 GN=PGM1 PE=1 SV=3	ENSG00000079739	PGM1	0	4.38919	4.18884	0.148428	0.2158	0.25583	0.518116	-0.200345	0.25583	0.51907	1.50875	1.17246	0.489802	0.392835	0.406076	0.790054	-0.336292	0.406076	0.797671
+pH fractionation/SP	High	P36873-2		Isoform 2 of Serine/threonine-protein phosphatase PP1-gamma catalytic subunit OS=Homo sapiens OX=9606 GN=PPP1CC	ENSG00000186298	PPP1CC	0	0.519253	-1.0763	0.342547	0.698533	0.0237527	0.171608	-1.59555	0.0237527	0.177125	2.45032	1.62346	0.559919	0.837022	0.228047	0.667758	-0.826859	0.228047	0.667399
+pH fractionation/SP	High	P36915		Guanine nucleotide-binding protein-like 1 OS=Homo sapiens OX=9606 GN=GNL1 PE=1 SV=2	ENSG00000235986	GNL1	0	2.64633	2.55722	0.280518	0.504146	0.802287	0.899815	-0.0891136	0.802287	0.897595	1.25249	1.71218	0.397604	0.595084	0.328282	0.742964	0.459681	0.328282	0.743982
[truncated: 4,947 more rows]

## Sheet: DIA protein quant
Supplemental Table S4: Protein quantification by DIA-MS
[truncated: 5,734 more rows]
