# Supplementary material for: Deep profiling and custom databases improve detection of proteoforms generated by alternative splicing
Source: HighWire-hosted journal article supplement (doi:10.1101/gr.248435.119), 2019-11-14
Supplement: Supplemental_Table_S5.xlsx [file Supplemental_Table_S5.xlsx]

## Sheet: DDA combined peptides quant
Supplemental Table S5: Peptide quantification by DDA-MS
									CYTO FRACTIONS							NUC FRACTIONS
Search	Master Protein Accessions	SWISS-PROT Accessions	Sequence	Annotated Sequence	Modifications	Qvality q-value	# Protein Groups	# PSMs	unstim_cyto avg	stim_cyto avg	unstim_cyto stdev	stim_cyto stdev	log2 FC_cyto (stim/unstim)	p.value	adjusted p.value	unstim_nuc avg	stim_nuc avg	unstim_nuc stdev	stim_nuc stdev	log2 FC_nuc (stim/unstim)	p.value	adjusted p.value
+pH fractionation/SP	P55011	P55011-3; P55011	AAAAAAAAAAAAAAAGAGAGAK	[R].AAAAAAAAAAAAAAAGAGAGAK.[Q]		0	1	2	3.06781	1.3896	0.0726305	2.88138	-1.67821	0.370276	0.829318	0.552258	-0.054698	1.87796	0.62895	-0.606956	0.623648	0.999952
+pH fractionation/SP	Q96JP5	Q96JP5; Q96JP5-2	AAAAAAAAAVSR	[R].AAAAAAAAAVSR.[R]		3.35083e-05	1	8	1.16217	1.26775	0.67731	0.680885	0.105579	0.858261	0.960861	1.9651	2.44572	1.6304	0.284963	0.480628	0.641417	0.999952
+pH fractionation/SP	P36578	P36578	AAAAAAALQAK	[K].AAAAAAALQAK.[S]		0	1	42	0.489085	-0.232667	0.408321	0.975138	-0.721752	0.302495	0.819326	-1.50146	-1.61852	1.60903	0.703234	-0.117058	0.931581	0.999952
+pH fractionation/SP	Q06945	Q06945	AAAAAAASFAAEQAGAAALLPLGAAADHHSLYK	[K].AAAAAAASFAAEQAGAAALLPLGAAADHHSLYK.[A]		0	1	1	-1.57449	-1.01336		1.35913	0.561122		NA	-1.07866	0.262178	1.06289	0.132536	1.34084	0.218689	0.999952
+pH fractionation/SP	Q6SPF0	Q6SPF0	AAAAAATAPPSPGPAQPGPR	[R].AAAAAATAPPSPGPAQPGPR.[A]		0	1	2		-4.60119		0.602205			NA	-0.169893						NA
+pH fractionation/SP	O76031	O76031	AAAAADLANR	[R].AAAAADLANR.[S]		4.19381e-05	1	5	2.16315	1.08105	0.624459	0.418413	-1.0821	0.0672369	0.818997	0.743555	0.352128	0.941458	0.0492563	-0.391426	0.511825	0.999952
+pH fractionation/SP	Q8WUQ7-2	Q8WUQ7; Q8WUQ7-2	AAAAALSQQQSLQER	[R].AAAAALSQQQSLQER.[L]		0	1	1	1.13439	1.32875	0.36002	0.29777	0.194359	0.553261	0.871082	0.426197	1.73087	1.95616	0.479334	1.30467	0.324657	0.999952
+pH fractionation/SP	A6NIH7	A6NIH7	AAAAASAAGPGGLVAGK	[K].AAAAASAAGPGGLVAGK.[E]		3.35083e-05	1	4	2.00697	1.39409	1.26184	1.79565	-0.612878	0.653894	0.898751	1.4974	1.70425	1.43015	0.910327	0.206848	0.842959	0.999952
+pH fractionation/SP	Q9BTD8	Q9BTD8-2; Q9BTD8-3; Q9BTD8; Q9BTD8-4	AAAAATVVPPMVGGPPFVGPVGFGPGDR	[R].AAAAATVVPPMVGGPPFVGPVGFGPGDR.[S]		4.19381e-05	1	1	-0.744452	-2.57592		3.9915	-1.83147		NA	-1.01266	0.472662	0.42847	1.24388	1.48533	0.134456	0.999952
+pH fractionation/SP	Q9P258	Q9P258	AAAAAWEEPSSGNGTAR	[K].AAAAAWEEPSSGNGTAR.[A]		0	1	6	0.12933	-0.230312	1.13998	0.803029	-0.359642	0.730014	0.918631	-1.89335	-0.487729	0.390295	1.28821	1.40563	0.153181	0.999952
+pH fractionation/SP	Q96L91	Q96L91-3; Q96L91-5; Q96L91; Q96L91-2; EP400_472_I1	AAAAPFQTSQASASAPR	[K].AAAAPFQTSQASASAPR.[H]		0	1	2	-1.65558	-2.89677		1.30569	-1.2412		NA	-2.70335	-2.18896			0.514384		NA
+pH fractionation/SP	P55036	P55036	AAAASAAEAGIATTGTEDSDDALLK	[R].AAAASAAEAGIATTGTEDSDDALLK.[M]		0	1	7	3.62915	2.27482	0.822558	0.726082	-1.35433	0.15764	0.818997	2.4146	3.79487	1.90134	0.398761	1.38027	0.406404	0.999952
+pH fractionation/SP	Q8WWH5	Q8WWH5	AAAAVVAAAAR	[R].AAAAVVAAAAR.[T]		0.000275366	1	9	1.09269	1.0502	0.511913	0.662043	-0.0424888	0.934153	0.982272	2.46551	2.78635	0.176791	0.109259	0.320839	0.0555803	0.999952
+pH fractionation/SP	Q8TDZ2-4	Q8TDZ2; Q8TDZ2-4	AAADFATHGK	[R].AAADFATHGK.[L]		0.000236593	1	1	-3.96978	1.53839	1.09402		5.50817		NA	-2.97863	-2.00881	2.42276	1.33485	0.969823	0.57646	0.999952
+pH fractionation/SP	Q6P2E9	Q6P2E9; Q6P2E9-2	AAADTLQGPMQAAYR	[R].AAADTLQGPMQAAYR.[E]		3.35083e-05	1	5	2.02227	2.33321	0.212368	1.30108	0.310946	0.703804	0.910667	2.68981	3.08027	0.872418	0.305636	0.390452	0.504974	0.999952
+pH fractionation/SP	Q9UNF1	Q9UNF1; Q9UNF1-2	AAAEAAAEAK	[K].AAAEAAAEAK.[A]		6.09156e-05	1	3	-1.42617		0.622898				NA							NA
+pH fractionation/SP	Q9NQP4	Q9NQP4	AAAEDVNVTFEDQQK	[K].AAAEDVNVTFEDQQK.[I]		0	1	1	-3.22356	-2.21024	1.57571		1.01332		NA	-0.489871	-1.43062	0.0604781		-0.940744		NA
+pH fractionation/SP	O95551	O95551; O95551-2; O95551-3	AAAEEGHIIPR	[R].AAAEEGHIIPR.[S]		3.35083e-05	1	4	0.639759	-2.09055	0.421713	1.57755	-2.73031	0.0544917	0.818997	-2.10812	-1.57034	1.71881	0.472948	0.537785	0.711185	0.999952
+pH fractionation/SP	Q9H9Y2	Q9H9Y2	AAAEELQEAAGAGDGATENGVQPPK	[K].AAAEELQEAAGAGDGATENGVQPPK.[A]		0	1	1	-0.901028	-1.49024		2.6645	-0.589208		NA	-1.44163	-0.279021	0.748518	1.05599	1.16261	0.194752	0.999952
+pH fractionation/SP	P30260-2	P30260-2; P30260	AAAEGLMSLLR	[K].AAAEGLMSLLR.[E]		4.19381e-05	1	9	1.90904	1.3373	0.0441569	0.970258	-0.571748	0.36557	0.829318	2.10549	0.97107	0.807276	0.912339	-1.13442	0.182061	0.999952
+pH fractionation/SP	Q01780	Q01780-2; Q01780	AAAEQAISVR	[K].AAAEQAISVR.[Q]		0.000152083	1	4	-3.65566	-3.41455			0.241114		NA	-1.86423	-0.848087	1.70066		1.01615		NA
+pH fractionation/SP	P02786	P02786	AAAEVAGQFVIK	[R].AAAEVAGQFVIK.[L]		4.19381e-05	1	11	0.325894	0.0538723	0.21427	0.722535	-0.272021	0.565752	0.875021	0.515753	0.643774	0.589613	0.964329	0.128021	0.854035	0.999952
+pH fractionation/SP	P07954	P07954-2; P07954	AAAEVNQDYGLDPK	[R].AAAEVNQDYGLDPK.[I]		0	1	18	-1.48114	-3.56271	0.214047		-2.08158		NA	0.952188	0.860694	0.525807	0.614822	-0.0914936	0.887622	0.999952
+pH fractionation/SP	Q9Y490	Q9Y490	AAAFEEQENETVVVK	[K].AAAFEEQENETVVVK.[E]		0	1	6	1.04514	0.471013	3.23271	0.475055	-0.574125	0.82694	0.949362	0.792954	1.69686	2.64199	0.0412065	0.903904	0.677456	0.999952
+pH fractionation/SP	O94826	O94826	AAAFEQLQK	[R].AAAFEQLQK.[W]		0.000177325	1	8	-2.09514	-2.08895	0.851425	0.362604	0.00618878	0.993313	0.99829	-1.44209	-1.83707	0.310169	0.220149	-0.394984	0.186684	0.999952
+pH fractionation/SP	Q9H9Y2	Q9H9Y2	AAAFPPGFSISEIK	[K].AAAFPPGFSISEIK.[N]		0.000236593	1	3	0.508439	0.433154	1.27903	4.95129	-0.0752846	0.980878	0.993875	-0.480217	-2.25711	1.82763	1.3801	-1.7769	0.333276	0.999952
+pH fractionation/SP	Q86YV0	Q86YV0-2; Q86YV0	AAAGAPGVR	[R].AAAGAPGVR.[A]		0.0069291	1	1	-2.94771	-0.338597	2.31535		2.60911		NA	-2.29862		0.204593				NA
+pH fractionation/SP	P35221-2	P35221; P35221-2	AAAGEFADDPCSSVK	[K].AAAGEFADDPCSSVK.[R]	1xCarbamidomethyl [C11]	0	1	5	1.23259	-0.622069	0.581272	1.51415	-1.85466	0.118716	0.818997	-0.382394	-1.84433	1.17349	0.387045	-1.46193	0.109789	0.999952
+pH fractionation/SP	Q96C19	Q96C19	AAAGELQEDSGLCVLAR	[K].AAAGELQEDSGLCVLAR.[L]	1xCarbamidomethyl [C13]	0	1	8	-3.02245	-2.19498	1.42109	0.577884	0.827467	0.403068	0.835161	-0.458438	-2.71875		0.532276	-2.26032		NA
+pH fractionation/SP	Q96T51	Q96T51; Q96T51-3	AAAGLGGGDSGDGTAR	[R].AAAGLGGGDSGDGTAR.[A]		0	1	1	-1.53597		0.403541				NA							NA
+pH fractionation/SP	Q5VSL9	Q5VSL9-4; Q5VSL9	AAAGLLPGGK	[R].AAAGLLPGGK.[A]		0.000177325	1	3	-2.69809	-0.256647	0.229943	0.000835494	2.44144	0.000749612	0.436786	-1.55676	-1.25327	0.856257	0.386233	0.303485	0.681283	0.999952
+pH fractionation/SP	Q9H147	Q9H147	AAAGMVWKPK	[R].AAAGMVWKPK.[S]		0.000236593	1	2	-2.90768	-0.63693			2.27075		NA	-0.902467	0.555057	1.44954	0.0157292	1.45752	0.270127	0.999952
+pH fractionation/SP	O14497	O14497; O14497-2	AAAGQESEGPAVGPPQPLGK	[K].AAAGQESEGPAVGPPQPLGK.[E]		0	1	3	-2.5206	0.294266			2.81487		NA	-0.102209	0.524495	1.6465	0.0691972	0.626705	0.644543	0.999952
+pH fractionation/SP	P0DMV9	P0DMV8-2; P0DMV9	AAAIGIDLGTTYSCVGVFQHGK	[K].AAAIGIDLGTTYSCVGVFQHGK.[V]	1xCarbamidomethyl [C14]	0.00037496	1	1	1.70572	1.57645	0.541947	0.468872	-0.129271	0.770315	0.931647	2.71677	0.260098	0.585946	0.155398	-2.45668	0.00216968	0.999952
+pH fractionation/SP	Q8IYS1	Q8IYS1	AAALASGCTVEIK	[R].AAALASGCTVEIK.[G]	1xCarbamidomethyl [C8]	3.35083e-05	1	5	6.14933	4.52533	0.0210208	0.9106	-1.62401	0.0366383	0.809966	4.71127	2.89411	0.900345	0.485165	-1.81715	0.0370249	0.999952
+pH fractionation/SP	Q14008	Q14008-2; Q14008; Q14008-3	AAALATVNAWAEQTGMK	[R].AAALATVNAWAEQTGMK.[E]		0	1	4	1.08655	1.42909	4.18735	1.89416	0.342537	0.923343	0.979275	0.512873	0.886244	1.50827	0.143364	0.373371	0.762159	0.999952
+pH fractionation/SP	Q96QE3	Q96QE3; Q96QE3-2	AAALDVYNAVSTSFQR	[K].AAALDVYNAVSTSFQR.[V]		4.19381e-05	1	1		-1.23921					NA	0.933017	0.0363591	0.169342	0.983057	-0.896658	0.311352	0.999952
+pH fractionation/SP	P31948	P31948-2; P31948; P31948-3	AAALEAMK	[K].AAALEAMK.[D]		0.000398881	1	16	0.578644	-0.326606	1.07048	2.12559	-0.90525	0.557421	0.872394	-0.861089	-1.41444	1.60034	0.66505	-0.553351	0.695832	0.999952
+pH fractionation/SP	P31948	P31948-2; P31948; P31948-3	AAALEAMKDYTK	[K].AAALEAMKDYTK.[A]		3.35083e-05	1	2	-0.552985	1.07179	0.316737	0.241957	1.62477	0.00903613	0.651183	-1.02043	-2.0108	1.13426	1.35454	-0.99037	0.511019	0.999952
+pH fractionation/SP	P31948	P31948-2; P31948	AAALEFLNR	[K].AAALEFLNR.[F]		4.19381e-05	1	41	2.80613	1.39816	1.03921	1.70411	-1.40797	0.320607	0.820259	0.787993	-1.3616	1.619	4.42783	-2.14959	0.473867	0.999952
+pH fractionation/SP	P31948	P31948-2; P31948	AAALEFLNRFEEAK	[K].AAALEFLNRFEEAK.[R]		0.00382884	1	1	-1.20004	-0.22463	0.366847	0.782263	0.975407	0.122202	0.818997	-1.33884	-1.16858	2.27366	0.731649	0.170268	0.928137	0.999952
+pH fractionation/SP	Q13423	Q13423	AAALEQFK	[R].AAALEQFK.[S]		0.00149115	1	2	5.75802	5.27424	0.376057	1.11436	-0.483777	0.515536	0.86143	4.93941	5.10511	0.64009	0.738778	0.165701	0.783661	0.999952
+pH fractionation/SP	Q14498	Q14498-3; Q14498; Q14498-2	AAAMANNLQK	[R].AAAMANNLQK.[G]		4.19381e-05	1	14	-1.85	-2.51159	0.091547	1.19497	-0.661581	0.393152	0.833053	-2.27676	-2.0574			0.219356		NA
+pH fractionation/SP	Q9NX63	Q9NX63	AAANEQLTR	[R].AAANEQLTR.[A]		0.000192563	1	6	2.55106	1.07802	0.471901	1.47574	-1.47304	0.182873	0.818997	0.960892	0.842742	1.62347	0.457334	-0.11815	0.929751	0.999952
+pH fractionation/SP	A5YKK6	A5YKK6-2; A5YKK6; A5YKK6-4; A5YKK6-3	AAANFSDR	[K].AAANFSDR.[S]		0.000849071	1	1	1.3546	-1.57566	0.516548		-2.93026		NA	-1.90037	-3.92174	1.24656	2.43582	-2.02137	0.26989	0.999952
+pH fractionation/SP	P26641-2	P26641; P26641-2	AAAPAPEEEMDECEQALAAEPK	[K].AAAPAPEEEMDECEQALAAEPK.[A]	1xCarbamidomethyl [C13]	0	1	11	-0.395799	-1.79541	0.0346919		-1.39961		NA		-4.2493		1.63158			NA
+pH fractionation/SP	P26641-2	P26641; P26641-2	AAAPAPEEEMDECEQALAAEPK	[K].AAAPAPEEEMDECEQALAAEPK.[A]	1xCarbamidomethyl [C13]; 1xOxidation [M10]	4.19381e-05	1	1	0.957643	0.27045	0.665277		-0.687192		NA	-0.0847111	-1.05597		0.494879	-0.97126		NA
+pH fractionation/SP	Q96D96	Q96D96-3; Q96D96; Q96D96-4	AAAPDVAPAPGPAPR	[R].AAAPDVAPAPGPAPR.[A]		3.35083e-05	1	5	-1.94391		1.23436				NA	1.42961	-2.49785	2.57791		-3.92746		NA
+pH fractionation/SP	P31350-2	P31350-2; P31350	AAAPGVEDEPLLR	[K].AAAPGVEDEPLLR.[E]		0	1	8	1.65871	-0.645512	0.57107	3.2424	-2.30422	0.292129	0.819326	-0.874291	-0.0143475	3.42388	0.648968	0.859943	0.760378	0.999952
+pH fractionation/SP	Q16643-3; Q16643-2	Q16643-3; Q16643; Q16643-2	AAAPQAWAGPMEEPPQAQAPPR	[R].AAAPQAWAGPMEEPPQAQAPPR.[G]		0	2	9		-2.53912		1.47983			NA		0.189546		0.963335			NA
+pH fractionation/SP	Q9NVA2-2	Q9NVA2-2; Q9NVA2	AAAQLLQSQAQQSGAQQTK	[K].AAAQLLQSQAQQSGAQQTK.[K]		0	1	6	1.92767	1.85701	0.297961	1.06457	-0.0706606	0.917179	0.977432	3.06968	3.45952	1.55364	0.545234	0.389845	0.702751	0.999952
+pH fractionation/SP	O14981	O14981	AAAQQLGEVVK	[K].AAAQQLGEVVK.[L]		0.000192563	1	4	2.18899	2.77365	0.607086	1.89811	0.584664	0.6313	0.892324	1.88442	3.51173	1.46509	1.51765	1.62731	0.315527	0.999952
+pH fractionation/SP	O95801	O95801	AAAQYYLGNFR	[R].AAAQYYLGNFR.[S]		0.0015008	1	1	-0.698559	-2.15018	0.261534	1.53562	-1.45162	0.181812	0.818997	0.491075	0.444699	0.515664	0.645057	-0.0463763	0.93837	0.999952
+pH fractionation/SP	Q96BN8	Q96BN8	AAASGQPRPEMQCPAEHEEDMYR	[K].AAASGQPRPEMQCPAEHEEDMYR.[A]	1xCarbamidomethyl [C13]	0.000836425	1	1	-0.506148	-1.36937	1.42721		-0.863219		NA	-0.559363	0.133206	2.40507	0.725128	0.692568	0.734214	0.999952
+pH fractionation/SP	Q9UNS1	Q9UNS1; Q9UNS1-2	AAASLSQPEEEQK	[R].AAASLSQPEEEQK.[L]		4.19381e-05	1	2	1.06049	0.627791	0.218099	0.0689054	-0.432702	0.0805332	0.818997	-1.58888		2.10128				NA
+pH fractionation/SP	P08559-4	P08559; P08559-4; P08559-2; P08559-3	AAASTDYYK	[R].AAASTDYYK.[R]		0.000360009	1	5	-2.54908	-4.60017	0.574398		-2.05109		NA							NA
+pH fractionation/SP	Q99733-2	Q99733; Q99733-2	AAATAEEPDPK	[K].AAATAEEPDPK.[G]		4.19381e-05	1	7	-1.11657	-3.23091	0.427945	0.291421	-2.11434	0.00939433	0.652823	-1.79845	-2.63948	1.57444	1.08089	-0.841031	0.488103	0.999952
+pH fractionation/SP	Q15262-4	Q15262-4; Q15262-2; Q15262-3	AAATEEPEVIPDPAK	[K].AAATEEPEVIPDPAK.[Q]		0.000671208	1	1	-0.978051	-3.35052	0.0336527	2.3962	-2.37247	0.296456	0.819326	-2.82809	-4.12206		2.25843	-1.29398		NA
+pH fractionation/SP	Q8N1S5	Q8N1S5; Q8N1S5-2	AAATGLPEGPAVPVPSR	[K].AAATGLPEGPAVPVPSR.[G]		0.000177325	1	1	-3.44119	-1.3216	0.255036	1.89328	2.11959	0.127018	0.818997	-1.14837	-2.8818	0.729899		-1.73343		NA
+pH fractionation/SP	Q9NVC6	Q9NVC6	AAATIDSLASR	[R].AAATIDSLASR.[I]		4.19381e-05	1	4	0.657458	1.56572	0.455947	0.510802	0.90826	0.0831583	0.818997	-0.926073	-0.546102	0.646417	1.25438	0.379971	0.665209	0.999952
+pH fractionation/SP	Q03252	Q03252	AAATMATPLPGR	[R].AAATMATPLPGR.[A]		0.000387362	1	3		-1.19417					NA	-0.209521	-1.02729	1.34121	2.85603	-0.817767	0.749115	0.999952
+pH fractionation/SP	P19404	P19404	AAAVLPVLDLAQR	[K].AAAVLPVLDLAQR.[Q]		4.19381e-05	1	6	3.7612	3.67554	0.335878	0.388647	-0.085668	0.787038	0.9367	3.94792	4.07325	0.748192	0.624392	0.125324	0.834644	0.999952
+pH fractionation/SP	O43837	O43837-2; O43837	AAAVPVEFQEHHLSEVQNMASEEK	[K].AAAVPVEFQEHHLSEVQNMASEEK.[L]		0	1	21	-0.825319	0.390657	0.683371	1.45826	1.21598	0.261038	0.818997	1.34749	2.40771	1.8246	0.890643	1.06022	0.416907	0.999952
+pH fractionation/SP	Q8N201	Q8N201	AAAVQADDVEVLK	[R].AAAVQADDVEVLK.[V]		3.35083e-05	1	4	-1.46261	-1.82947	0.259469		-0.366865		NA	-2.79073		2.07735				NA
+pH fractionation/SP	Q9UBF2	Q9UBF2-2; Q9UBF2	AAAVSALAK	[R].AAAVSALAK.[F]		0.000177325	1	5	4.6479	4.88028	2.2451	0.966469	0.232386	0.877189	0.96645	3.80395	3.1291	1.16327	1.31052	-0.674851	0.541255	0.999952
+pH fractionation/SP	Q70CQ2	Q70CQ2; Q70CQ2-3; Q70CQ2-2	AAAYDLLVEMVK	[R].AAAYDLLVEMVK.[G]		4.19381e-05	1	1	-3.33889	-3.02862		2.88159	0.310268		NA	-3.09029	-3.86891	1.08533	0.897722	-0.778624	0.467012	0.999952
+pH fractionation/SP	P55060	P55060-4; P55060-3; P55060	AACDLVR	[R].AACDLVR.[G]	1xCarbamidomethyl [C3]	0.00359362	1	5	1.34259	-1.02223	0.442099	1.32615	-2.36483	0.0549773	0.818997	-1.71201	-1.29768	2.34897	0.650254	0.414328	0.831292	0.999952
+pH fractionation/SP	O95235	O95235; O95235-2	AACIAEQYHTVLK	[K].AACIAEQYHTVLK.[L]	1xCarbamidomethyl [C3]	4.19381e-05	1	2		-1.64341					NA	-1.42767	-0.775757	0.997305	0.119159	0.651916	0.308662	0.999952
+pH fractionation/SP	O95989; Q9NZJ9; Q96G61	O95989; Q8NFP7; Q9NZJ9; Q96G61; Q9NZJ9-2	AACLCFR	[R].AACLCFR.[S]	2xCarbamidomethyl [C3; C5]	0.0021851	3	3	-1.79845	-1.64436	0.295785	0.776305	0.1541	0.764079	0.929242	-2.02642	-1.64938	1.39072	0.92484	0.377044	0.715719	0.999952
+pH fractionation/SP	Q8TDX7	Q8TDX7; Q8TDX7-2	AACLLDGVPVALK	[R].AACLLDGVPVALK.[K]	1xCarbamidomethyl [C3]	4.19381e-05	1	9	-0.677798	-0.626037	1.1925	0.318972	0.0517603	0.958106	0.98784	-0.863196	-0.214579	2.03932	0.0227005	0.648617	0.588815	0.999952
+pH fractionation/SP	Q8TDX7	Q8TDX7; Q8TDX7-2	AACLLDGVPVALKK	[R].AACLLDGVPVALKK.[V]	1xCarbamidomethyl [C3]	0.000236593	1	1	-4.5554	-2.82084	0.223143	0.536302	1.73456	0.051758	0.818997	-4.11672		1.3341				NA
+pH fractionation/SP	P02768	P02768	AACLLPK	[K].AACLLPK.[L]	1xCarbamidomethyl [C3]	0.00459862	1	3	-0.136338	-1.39851	0.446818	0.520449	-1.26217	0.0612293	0.818997	-2.08516	-2.88925	1.38277	0.507331	-0.804089	0.397912	0.999952
+pH fractionation/SP	P13796	P13796	AACLPLPGYR	[K].AACLPLPGYR.[V]	1xCarbamidomethyl [C3]	4.19381e-05	1	27	2.22445	1.33651	0.571399	2.10855	-0.887936	0.520259	0.862123	-0.172504	-1.43742	2.00337	1.52803	-1.26491	0.433618	0.999952
+pH fractionation/SP	Q9HC38-2	Q9HC38-3; Q9HC38-2	AACNGPYDGK	[K].AACNGPYDGK.[W]	1xCarbamidomethyl [C3]	0.000114852	1	2	-1.07047		2.15249				NA	-2.01318	-1.85177	2.65986		0.161407		NA
+pH fractionation/SP	Q01813	Q01813; Q01813-2	AACNLLQR	[K].AACNLLQR.[G]	1xCarbamidomethyl [C3]	0.000346548	1	4	1.16239	-0.109429	0.241171	2.48958	-1.27182	0.428212	0.839816	-0.17227	-2.14239	2.02809	0.887518	-1.97012	0.3352	0.999952
+pH fractionation/SP	Q05086	Q05086; Q05086-2; Q05086-3	AACSAAAMEEDSEASSSR	[K].AACSAAAMEEDSEASSSR.[I]	1xCarbamidomethyl [C3]	0	1	3	-2.24082		1.41864				NA	0.010407						NA
+pH fractionation/SP	Q14980-2; Q14980	NUMA1_2515_I0; Q14980-3; Q14980-2; Q14980-4; Q14980; NUMA1_2515_E0	AADALEEQQR	[R].AADALEEQQR.[C]		4.19381e-05	2	14	-0.156659	-0.230547		2.83292	-0.0738879		NA	1.7347	2.52375	1.7561	0.819788	0.789052	0.607107	0.999952
+pH fractionation/SP	Q9UNF0	Q9UNF0; Q9UNF0-2	AADAVEDLR	[R].AADAVEDLR.[W]		4.19381e-05	1	6	0.318252	0.579097	0.194456	0.786176	0.260844	0.693427	0.908188	-2.9317	-1.21355		0.850274	1.71814		NA
+pH fractionation/SP	Q7Z6E9	Q7Z6E9-4; Q7Z6E9-2; Q7Z6E9-3; Q7Z6E9	AADCDLQITNAQTK	[K].AADCDLQITNAQTK.[E]	1xCarbamidomethyl [C4]	0	1	3	-2.05112	-0.675458		2.25945	1.37566		NA	-1.14139	0.885285	3.11016	0.0013575	2.02668	0.446328	0.999952
+pH fractionation/SP	Q9UBQ7	Q9UBQ7	AADCEVEQWDSDEPIPAK	[R].AADCEVEQWDSDEPIPAK.[E]	1xCarbamidomethyl [C4]	0	1	7	-2.42807	1.10811	0.897818		3.53618		NA	1.78763	0.820667	0.465305	0.64111	-0.966963	0.169628	0.999952
+pH fractionation/SP	Q9UBQ7	Q9UBQ7	AADCEVEQWDSDEPIPAKELER	[R].AADCEVEQWDSDEPIPAKELER.[G]	1xCarbamidomethyl [C4]	0	1	4	-1.83138		0.132947				NA							NA
+pH fractionation/SP	P55060	P55060-4; P55060-3; P55060	AADEEAFEDNSEEYIR	[R].AADEEAFEDNSEEYIR.[R]		0	1	11	1.87541	1.46257	0.11747		-0.412844		NA	1.96177						NA
+pH fractionation/SP	P55060	P55060-4; P55060-3; P55060	AADEEAFEDNSEEYIRR	[R].AADEEAFEDNSEEYIRR.[D]		4.19381e-05	1	2	-4.36542	-0.448061	0.357028		3.91736		NA	0.961417	-0.186536	0.15587	0.254373	-1.14795	0.0115031	0.999952
+pH fractionation/SP	P29374	P29374-2; P29374-3; P29374	AADEPAYLTVGTDVSAK	[K].AADEPAYLTVGTDVSAK.[Y]		0	1	2	1.2532	0.618068	0.383927	1.1883	-0.635128	0.428111	0.839816	1.122	0.991637	0.618975	1.69722	-0.130361	0.906566	0.999952
+pH fractionation/SP	P49916	P49916-4; P49916-3; P49916-2; P49916	AADETLCQTK	[K].AADETLCQTK.[RV]	1xCarbamidomethyl [C7]	0.00030511	1	3	0.0174836	-2.5697	0.420294	2.31556	-2.58718	0.129623	0.818997	-2.61786	-3.25528	2.30487		-0.637422		NA
+pH fractionation/SP	P07954	P07954-2; P07954	AADEVAEGK	[K].AADEVAEGK.[L]		0.000553704	1	1	-3.30564	-5.02692	3.36402		-1.72128		NA	-1.99722	-3.94805	1.47916	1.36249	-1.95083	0.234781	0.999952
+pH fractionation/SP	Q6P1J9	Q6P1J9	AADEVLAEAK	[R].AADEVLAEAK.[K]		4.19381e-05	1	7	4.46577	3.90337	0.828963	2.38384	-0.562396	0.719178	0.91552	5.24615	5.77306	1.73928	0.969646	0.526908	0.670526	0.999952
+pH fractionation/SP	P51452	P51452; P51452-2	AADFIDQALAQK	[R].AADFIDQALAQK.[N]		4.19381e-05	1	3	-0.894576	-0.858083	0.400296	0.0567907	0.0364934	0.910103	0.975122	-4.68229	-1.90978			2.77251		NA
+pH fractionation/SP	Q63HN8-4	Q63HN8; Q63HN8-4	AADFLSEPEGGPEMAK	[R].AADFLSEPEGGPEMAK.[E]		3.35083e-05	1	5	2.64628	2.1698	0.910966	1.8472	-0.476476	0.709123	0.91207	-0.901816	-0.822703	3.16908	0.0902623	0.0791131	0.967596	0.999952
+pH fractionation/SP	Q9Y277	Q9Y277; Q9Y277-2	AADFQLHTHVNDGTEFGGSIYQK	[K].AADFQLHTHVNDGTEFGGSIYQK.[V]		0	1	15	1.45467	-1.83885	0.930088	2.91726	-3.29352	0.13592	0.818997	-1.42796	-2.90057	2.22098	2.88516	-1.47261	0.522203	0.999952
+pH fractionation/SP	P15923-3	P15923; P15923-3; P15923-2	AADGSLDTQPK	[R].AADGSLDTQPK.[K]		0.000177325	1	1	0.317782	-0.0849506	0.443567		-0.402733		NA	-0.0515728	-2.12753			-2.07596		NA
+pH fractionation/SP	O43395	O43395	AADHLKPFLDDSTLR	[K].AADHLKPFLDDSTLR.[F]		0	1	6	2.07482	0.671714	0.242739	0.913993	-1.4031	0.0619888	0.818997	-0.25967	-0.568863	0.902908	1.27503	-0.309194	0.749022	0.999952
+pH fractionation/SP	Q9UPP1	Q9UPP1-3; Q9UPP1-2; Q9UPP1; Q9UPP1-4; Q9UPP1-5	AADIDLYHCPNCEVLHGPSIMK	[K].AADIDLYHCPNCEVLHGPSIMK.[K]	2xCarbamidomethyl [C9; C12]	0	1	1	3.34134	4.03629	0.382408	0.69678	0.694954	0.204485	0.818997	4.35517	4.18403	0.99925	0.778901	-0.171141	0.826499	0.999952
+pH fractionation/SP	Q86VP6	Q86VP6	AADIDQEVK	[K].AADIDQEVK.[E]		0.000177325	1	7	3.24392	2.30701	0.854102	0.51008	-0.936911	0.178178	0.818997	2.88786	2.82483	0.718794	0.13676	-0.063038	0.888599	0.999952
+pH fractionation/SP	Q86VP6	Q86VP6	AADIDQEVKER	[K].AADIDQEVKER.[A]		4.19381e-05	1	1	-1.91782	-2.81722	0.226597	0.143459	-0.899404	0.0416972	0.818997							NA
+pH fractionation/SP	Q12888-2	Q12888; Q12888-3; Q12888-2	AADISLDNLVEGK	[K].AADISLDNLVEGK.[R]		0	1	5	-0.946561	0.393679	0.494298	0.338861	1.34024	0.0179404	0.72085	-1.91064	-2.76092	2.20746	0.67934	-0.850286	0.65452	0.999952
+pH fractionation/SP	Q13573	Q13573	AADKLAPAQYIR	[R].AADKLAPAQYIR.[Y]		0.000246334	1	4	2.67339	3.14775	2.14352	2.68484	0.47436	0.822743	0.948736	2.71007	0.40556	2.29042	0.887603	-2.30451	0.179497	0.999952
+pH fractionation/SP	Q9H0R6	Q9H0R6	AADLFESEGAK	[K].AADLFESEGAK.[V]		4.19381e-05	1	4	-0.785981	-2.12304	0.737269	1.16532	-1.33706	0.16837	0.818997	-2.38415	-2.98122	1.65354	0.914554	-0.597072	0.682483	0.999952
+pH fractionation/SP	Q8NFC6	Q8NFC6	AADLLAVHAVK	[R].AADLLAVHAVK.[I]		4.19381e-05	1	2	-1.30171	0.467709	0.257179	2.16059	1.76942	0.231753	0.818997	-0.531969	0.316662	2.33629	1.13239	0.848631	0.601545	0.999952
+pH fractionation/SP	P78362-2	P78362-2; P78362	AADLLVNPLDPR	[R].AADLLVNPLDPR.[N]		4.19381e-05	1	15	2.86393	2.40185	0.828683	0.449896	-0.462077	0.535191	0.866409	2.13331	2.24227	2.12543	0.373738	0.108953	0.949882	0.999952
+pH fractionation/SP	O15382	O15382	AADLQLEMTQKPHK	[K].AADLQLEMTQKPHK.[K]		0	1	5	-3.0264	-1.71393	0.0729062	2.18771	1.31246	0.485762	0.854843	-2.10762	-0.262829		0.684064	1.84479		NA
+pH fractionation/SP	P30038	P30038-2; P30038; P30038-3	AADMLSGPR	[K].AADMLSGPR.[R]		0.00122739	1	6	4.72658	3.60644	0.130509	1.20964	-1.12013	0.186021	0.818997	-0.741408	2.36913	4.296	1.50963	3.11054	0.302256	0.999952
+pH fractionation/SP	P67809	P67809	AADPPAENSSAPEAEQGGAE	[K].AADPPAENSSAPEAEQGGAE.[-]		0	1	16	0.418814	0.0573617	0.330333	0.939877	-0.361453	0.560102	0.873276	-1.40805	-2.35496	2.81116	1.6191	-0.946909	0.719804	0.999952
+pH fractionation/SP	Q7Z6I8	Q7Z6I8-2; Q7Z6I8	AADQFDIYSSQQSK	[R].AADQFDIYSSQQSK.[Y]		3.35083e-05	1	3	-6.71394	-1.46051		0.822151	5.25343		NA		-3.23		0.75826			NA
+pH fractionation/SP	P35251	P35251; P35251-2	AADSICDGDLVDSQIR	[R].AADSICDGDLVDSQIR.[S]	1xCarbamidomethyl [C6]	0	1	5	-0.844945	-0.533114	0.777822	1.64421	0.311832	0.784399	0.935972	-0.853244	-2.31504		1.32093	-1.46179		NA
+pH fractionation/SP	Q1ED39	Q1ED39	AADSLQQNLQR	[K].AADSLQQNLQR.[D]		4.19381e-05	1	6		-2.25128		3.12823			NA		-1.57904					NA
+pH fractionation/SP	P12270	P12270	AADSQNSGEGNTGAAESSFSQEVSR	[R].AADSQNSGEGNTGAAESSFSQEVSR.[E]		0.000877399	1	1	-1.04498	-1.72191	0.718732	0.770501	-0.676923	0.328185	0.822014	-0.522526	-2.19666		0.248506	-1.67414		NA
+pH fractionation/SP	Q9NU22	Q9NU22	AADVEQLKPEEIK	[K].AADVEQLKPEEIK.[S]		0.000192563	1	3	-1.0391	-0.893264	0.91387	0.952977	0.145839	0.874153	0.96558							NA
+pH fractionation/SP	O75569	O75569-3; O75569; O75569-2	AAEAAINILK	[R].AAEAAINILK.[A]		4.19381e-05	1	15	-0.656159	-0.171692	1.24224	0.665691	0.484467	0.583634	0.879744	0.906892	-0.806743	0.84952	0.727253	-1.71364	0.103538	0.999952
+pH fractionation/SP	Q14692	Q14692	AAEAFLR	[K].AAEAFLR.[Q]		0.00391717	1	4	-1.92941		1.75354				NA	-1.76509	-3.14428	1.93961		-1.37919		NA
+pH fractionation/SP	Q08211	Q08211	AAECNIVVTQPR	[R].AAECNIVVTQPR.[R]	1xCarbamidomethyl [C4]	0	1	42	-1.17483	0.311975	0.622943	1.95977	1.4868	0.280614	0.819124	0.117634	1.56565	2.3339	0.331044	1.44802	0.468275	0.999952
+pH fractionation/SP	P06454	P06454-2; P06454	AAEDDEDDDVDTK	[R].AAEDDEDDDVDTK.[K]		0	1	14	0.464499	-1.62627	0.706289	4.21081	-2.09077	0.426922	0.839816	0.928096	0.79351	0.81138	1.90796	-0.134587	0.915896	0.999952
+pH fractionation/SP	P06454	P06454-2; P06454	AAEDDEDDDVDTKKQK	[R].AAEDDEDDDVDTKKQK.[T]		0	1	4	-1.41587	0.174567	0.892237		1.59044		NA	0.3447	-2.98497	2.29507	3.06966	-3.32967	0.288543	0.999952
+pH fractionation/SP	P09496-2	P09496-2; CLTA_1619_E2; P09496-5	AAEEAFVNDIDESSPGTEWER	[R].AAEEAFVNDIDESSPGTEWER.[V]		4.19381e-05	1	2	-1.45361	-3.59997			-2.14636		NA	-1.63671	-2.94124			-1.30453		NA
+pH fractionation/SP	Q13356	Q13356	AAEEEPSTSATVPMSK	[R].AAEEEPSTSATVPMSK.[K]		4.19381e-05	1	1	0.138132	-3.04179	1.18488	1.45442	-3.17992	0.0425605	0.818997		-5.23531					NA
+pH fractionation/SP	Q9NPJ8-3	Q9NPJ8-3; Q9NPJ8-2; Q9NPJ8	AAEEFVNIYYETMDK	[R].AAEEFVNIYYETMDK.[R]		0	1	2	0.639066	0.490284	1.9125	1.25351	-0.148782	0.915702	0.977179	0.420855	0.695183	1.64678	1.25639	0.274328	0.829815	0.999952
+pH fractionation/SP	Q9UKK6	Q9UKK6	AAEEFVNVYYTTMDK	[R].AAEEFVNVYYTTMDK.[R]		0	1	2		-1.28046		0.742931			NA	-1.5451	-3.03253	1.07166	1.6585	-1.48743	0.297977	0.999952
+pH fractionation/SP	P11586	P11586; MTHFD1_2858_I1	AAEEIGIK	[K].AAEEIGIK.[A]		0.00163859	1	20	-1.19422	-0.813316	0.418498	0.705581	0.380905	0.489859	0.855621	-2.23271	-1.20817	0.280998	0.678524	1.02455	0.147108	0.999952
+pH fractionation/SP	O60337	O60337-5; O60337; O60337-6	AAEELTWER	[R].AAEELTWER.[M]		0.000236593	1	1	-2.11808	-3.79446	0.463233	1.35175	-1.67638	0.124483	0.818997	-3.5241	-4.20072	1.47058	0.0788938	-0.676621	0.582512	0.999952
+pH fractionation/SP	P43243-2	P43243-2	AAEEWSQHINGASHSR	[R].AAEEWSQHINGASHSR.[R]		3.35083e-05	1	1		-0.29614					NA	-2.08123	0.72468	2.22549	0.392836	2.80591	0.22119	0.999952
+pH fractionation/SP	P52739	P52739-2; P52739; ZNF131_6478_I2	AAEFLQMLEAIK	[K].AAEFLQMLEAIK.[A]		4.19381e-05	1	4	0.327641	2.57882	1.25955	2.85877	2.25118	0.280049	0.819124	4.40486	2.97242	2.75798	5.27268	-1.43244	0.698117	0.999952
+pH fractionation/SP	Q9NW13	Q9NW13; Q9NW13-2	AAEGVSAADMAK	[K].AAEGVSAADMAK.[R]		3.35083e-05	1	9	-1.46679	-2.3721	0.4997	0.744211	-0.905313	0.192778	0.818997	-1.97956	-3.23823	0.37277	1.36474	-1.25866	0.335305	0.999952
+pH fractionation/SP	Q99575	Q99575	AAEISAMLK	[R].AAEISAMLK.[A]		6.09156e-05	1	7	1.43216	3.08872	0.630207	1.58619	1.65656	0.168042	0.818997	3.44629	4.31864	1.62942	1.01994	0.872353	0.475811	0.999952
+pH fractionation/SP	Q9HCS7	Q9HCS7	AAEIYGVTHTR	[R].AAEIYGVTHTR.[G]		4.19381e-05	1	12	-2.85912	-1.76612	0.417127	0.384526	1.093	0.0602633	0.818997	-1.24474	-2.50672			-1.26198		NA
+pH fractionation/SP	Q9NS39	Q9NS39	AAELALR	[R].AAELALR.[S]		0.00718461	1	3	-1.76382	-1.36522	0.693745	2.69587	0.398603	0.816334	0.947051	0.00533845	2.34948	2.43345	0.713717	2.34414	0.184623	0.999952
+pH fractionation/SP	O94906	O94906-2; O94906	AAELETDIR	[R].AAELETDIR.[A]		6.09156e-05	1	14	1.21388	0.674221	0.102145	1.00661	-0.539655	0.407859	0.835568	1.19677	1.30321	0.52454	0.49908	0.106441	0.811563	0.999952
+pH fractionation/SP	Q6P179	Q6P179-3; Q6P179	AAELFSQWMESSGK	[K].AAELFSQWMESSGK.[L]		0.000261709	1	3	-2.68897	-1.44342	0.6104	2.04337	1.24555	0.368944	0.829318	0.173766	0.290869	2.05011	0.898044	0.117103	0.932149	0.999952
+pH fractionation/SP	P35232	P35232	AAELIANSLATAGDGLIELR	[K].AAELIANSLATAGDGLIELR.[K]		0	1	15	-0.537488	-0.681081	0.902934	0.536038	-0.143593	0.824406	0.948837	-0.748894	-0.719987	1.73364	0.878805	0.0289066	0.981102	0.999952
+pH fractionation/SP	P05023	P05023-2; P54707-2; P05023; P05023-4; P54707; P05023-3	AAELLAR	[R].AAELLAR.[D]		0.0025538	1	8	1.57324	-0.00721221	0.215115	1.76994	-1.58046	0.19356	0.818997	1.43399	-0.816713			-2.2507		NA
+pH fractionation/SP	Q9BUK6	Q9BUK6-7; MSTO2P_5363_I0; MSTO2P_5363_E0; Q9BUK6; Q9BUK6-2; Q9BUK6-5; Q9BUK6-3	AAELLQDEYSGR	[K].AAELLQDEYSGR.[G]		3.35083e-05	1	6	1.23084	0.471904	0.565763	4.5044	-0.758933	0.786547	0.93653	3.4112	4.34059	2.37542	2.1566	0.92939	0.642211	0.999952
+pH fractionation/SP	Q86XR8	Q86XR8-5; Q86XR8; Q86XR8-4; Q86XR8-3; Q86XR8-2	AAELQTGLETNR	[K].AAELQTGLETNR.[L]		4.19381e-05	1	3	-4.16612	-0.91248		1.76057	3.25364		NA	2.19735	2.02892	1.49299	0.758546	-0.168431	0.870165	0.999952
+pH fractionation/SP	O75717	O75717-2; O75717	AAELTATQVEEEEEEEDFRK	[K].AAELTATQVEEEEEEEDFRK.[K]		0.000114852	1	1	-0.0878773	-1.32214			-1.23426		NA	0.462577	-3.8858			-4.34838		NA
+pH fractionation/SP	Q86TM6	Q86TM6-2; Q86TM6-3; Q86TM6	AAEMEHLLER	[R].AAEMEHLLER.[S]		0.000177325	1	1	-2.81664	-1.49494	1.05932		1.3217		NA							NA
+pH fractionation/SP	P78318	P78318	AAEMLSQLDLFSR	[K].AAEMLSQLDLFSR.[N]		3.35083e-05	1	3	1.98412	1.63981	0.843573		-0.344304		NA	-1.52432	-0.168194	4.6813		1.35612		NA
+pH fractionation/SP	P33176	P33176	AAEMMASLLK	[R].AAEMMASLLK.[D]		4.19381e-05	1	9	-1.55173	-0.363967	1.52911	0.458839	1.18776	0.383041	0.831052	-3.35304	-3.16353	0.837525		0.189515		NA
+pH fractionation/SP	O60524	O60524-5; O60524-4; O60524-3; O60524	AAEPLLTLER	[R].AAEPLLTLER.[L]		0.000177325	1	2	0.526393	2.18777	0.561179	2.71322	1.66138	0.357647	0.82792	3.81033	5.93857	3.79592	0.701205	2.12824	0.393683	0.999952
+pH fractionation/SP	P49327	P49327	AAEQYTPK	[R].AAEQYTPK.[A]		0.00123919	1	4	0.382643	-0.948605	0.946773	1.23739	-1.33125	0.212994	0.818997	-0.666368	-1.43081	1.61365	0.672732	-0.764437	0.585173	0.999952
+pH fractionation/SP	Q9NS91	Q9NS91	AAESAEIEPR	[R].AAESAEIEPR.[N]		4.19381e-05	1	2	-1.99604	-3.04053	0.854645		-1.04449		NA	-2.8474						NA
+pH fractionation/SP	O76021	O76021-2; O76021	AAESETPGK	[K].AAESETPGK.[S]		0.000725356	1	1	1.43277	0.488663	0.634908	1.27762	-0.944103	0.315628	0.820259	1.63805	1.12692	0.894822	0.58918	-0.511134	0.455055	0.999952
+pH fractionation/SP	Q96RU3	Q96RU3-2; Q96RU3-4; Q96RU3-3; Q96RU3; Q96RU3-5	AAESIDQKNDSQLVIEAYK	[K].AAESIDQKNDSQLVIEAYK.[S]		4.19381e-05	1	1							NA		-1.72961		1.27241			NA
+pH fractionation/SP	P35606	P35606-2; P35606	AAESLADPTEYENLFPGLK	[K].AAESLADPTEYENLFPGLK.[E]		0	1	13	-0.0534292	0.42198	0.331681	1.42215	0.475409	0.602953	0.885181	0.876042	1.43603	1.91138	1.01381	0.559988	0.677153	0.999952
+pH fractionation/SP	Q14676	Q14676; Q14676-2; Q14676-3	AAESLTAIPEPASPQLLETPIHASQIQK	[R].AAESLTAIPEPASPQLLETPIHASQIQK.[V]		0	1	3		4.38466					NA	0.656779	-0.263169	0.22572	1.849	-0.919948	0.557188	0.999952
+pH fractionation/SP	Q9BY42	Q9BY42	AAESVSKPDVSEEAPGPSK	[K].AAESVSKPDVSEEAPGPSK.[V]		0	1	6	-1.77378	-1.47491	0.331258	2.66922	0.298879	0.847653	0.956972	-1.45671	0.158659	0.982459	0.807857	1.61537	0.152574	0.999952
+pH fractionation/SP	Q9GZS1-2	Q9GZS1; Q9GZS1-2	AAETIIDTK	[K].AAETIIDTK.[G]		0.000169063	1	4	-3.39547	-1.62938		3.53687	1.76609		NA	-1.01208	3.37652	1.32116	0.842789	4.3886	0.00833586	0.999952
+pH fractionation/SP	P56192	P56192; P56192-2; MARS_522_I0	AAETVLK	[R].AAETVLK.[Q]		0.00920822	1	14	5.9961	3.36776	0.564168	4.20833	-2.62834	0.328485	0.822014	2.89085	0.600377	3.8208	3.18513	-2.29047	0.469799	0.999952
+pH fractionation/SP	P52272	P52272-2; P52272	AAEVLNK	[K].AAEVLNK.[H]		0.000950814	1	13	0.526715	1.60517			1.07846		NA	0.550265	2.32964	2.52216	0.275604	1.77937	0.41494	0.999952
+pH fractionation/SP	P52272	P52272-2; P52272	AAEVLNKHSLSGRPLK	[K].AAEVLNKHSLSGRPLK.[V]		4.19381e-05	1	3	-2.32583	-0.612479	0.725595	1.8857	1.71335	0.215822	0.818997	0.352712	0.925776	1.62052	0.302201	0.573065	0.670173	0.999952
+pH fractionation/SP	Q10471	Q8N4A0; Q10471; Q8N4A0-2	AAEVWMDEYK	[R].AAEVWMDEYK.[EN]		4.19381e-05	1	10	-0.635181	-0.78162	0.662111	1.7878	-0.146439	0.900585	0.973089	0.125122	0.528922	1.11899	0.885873	0.403799	0.649761	0.999952
+pH fractionation/SP	Q7Z4V5	Q7Z4V5-3; Q7Z4V5-2; Q7Z4V5-4; Q7Z4V5	AAEVYTR	[K].AAEVYTR.[L]		0.00654997	1	6	3.61807	2.21592	0.790643	1.00361	-1.40214	0.130112	0.818997	1.24279	0.753916	1.85648	0.344408	-0.488871	0.749268	0.999952
+pH fractionation/SP	Q9NVZ3-2	Q9NVZ3; Q9NVZ3-3; Q9NVZ3-2	AAEWQLDQPSWSGR	[R].AAEWQLDQPSWSGR.[L]		3.35083e-05	1	4	-2.80563	-1.85731	0.956664	0.20969	0.948321	0.304375	0.819326	-1.03856	-3.50998		0.186277	-2.47142		NA
+pH fractionation/SP	Q9Y4A5	Q9Y4A5; Q9Y4A5-2	AAFAMVTHVK	[R].AAFAMVTHVK.[Q]		0.000177325	1	2		0.49881					NA	0.259092	0.927061	1.90527	0.155506	0.667968	0.670131	0.999952
+pH fractionation/SP	P62258	P62258-2; P62258	AAFDDAIAELDTLSEESYK	[K].AAFDDAIAELDTLSEESYK.[D]		0	1	44	-2.492	-2.27986	1.33595	0.887953	0.212142	0.830057	0.949988	-2.96132	-2.63305	1.68203	0.391008	0.328272	0.812832	0.999952
+pH fractionation/SP	O00273	O00273-2; O00273	AAFGEEVDAVDTGISR	[K].AAFGEEVDAVDTGISR.[E]		0	1	4	-1.17986	-3.29381	0.887915	2.06231	-2.11395	0.195263	0.818997	-1.20563	-3.72853			-2.5229		NA
+pH fractionation/SP	P35908	P35908	AAFGGSGGR	[K].AAFGGSGGR.[G]		0.00973938	1	5	5.541	2.43487	1.00861	2.28174	-3.10613	0.0972647	0.818997	2.51519	1.123	1.77674	1.85815	-1.39219	0.40138	0.999952
+pH fractionation/SP	Q9UQ35	Q9UQ35-3; Q9UQ35; Q9UQ35-2	AAFGISDSYVDGSSFDPQR	[R].AAFGISDSYVDGSSFDPQR.[R]		0	1	5	0.601949	0.630243	0.268839	0.516695	0.0282945	0.936988	0.982651	-0.218827	-0.459441	0.692773	1.45959	-0.240614	0.809174	0.999952
+pH fractionation/SP	Q9UQ35	Q9UQ35-3; Q9UQ35; Q9UQ35-2	AAFGISDSYVDGSSFDPQRR	[R].AAFGISDSYVDGSSFDPQRR.[A]		3.35083e-05	1	1	-3.78631	-0.506708	3.36046	3.57516	3.2796	0.444297	0.844336	1.06948	1.44121	2.11974	0.850005	0.371731	0.791989	0.999952
+pH fractionation/SP	P31040	P31040-2; P31040; P31040-3	AAFGLSEAGFNTACVTK	[R].AAFGLSEAGFNTACVTK.[L]	1xCarbamidomethyl [C14]	0	1	8	3.46425	2.04728	0.425422	0.989963	-1.41696	0.085	0.818997	0.629115	1.17985	2.36998	0.638351	0.550739	0.717339	0.999952
+pH fractionation/SP	Q08380	Q08380	AAFGQGSGPIMLDEVQCTGTEASLADCK	[R].AAFGQGSGPIMLDEVQCTGTEASLADCK.[S]	2xCarbamidomethyl [C17; C27]	3.35083e-05	1	1	-1.94802	0.160605			2.10863		NA	0.565892	1.8583	2.13106	0.984506	1.29241	0.394295	0.999952
+pH fractionation/SP	Q96T58	Q96T58	AAFITYLQAK	[K].AAFITYLQAK.[Q]		0.000398881	1	2	-4.65698	-2.68385		0.492335	1.97313		NA	-2.39498	-0.152703	1.55842	0.522229	2.24228	0.15695	0.999952
+pH fractionation/SP	Q5JTZ9	Q5JTZ9	AAFLNFFR	[R].AAFLNFFR.[D]		0.000346548	1	3	1.30427	0.648496	0.97971	3.32981	-0.655775	0.752869	0.926	-0.987087	-0.909319	2.47806	0.683085	0.0777686	0.969759	0.999952
+pH fractionation/SP	Q96SB8-2	Q96SB8-2; Q96SB8	AAFNDMR	[K].AAFNDMR.[A]		0.0049861	1	3	1.63664	-2.18087	0.624864	4.63112	-3.81751	0.222047	0.818997	-0.321567	-2.60973	1.31965	2.55937	-2.28817	0.264041	0.999952
+pH fractionation/SP	P04406	P04406	AAFNSGK	[R].AAFNSGK.[V]		0.000790191	1	10	1.77309	0.536852	0.798142	1.19275	-1.23624	0.248504	0.818997	-2.14106	-1.61744	3.27835		0.523629		NA
+pH fractionation/SP	Q9UBI1	Q9UBI1	AAFQSLLDAQADEAVLDHPDLK	[R].AAFQSLLDAQADEAVLDHPDLK.[H]		0	1	6	-2.70279	-1.72854	0.79731	2.55117	0.974251	0.562104	0.873886	-1.10072	0.266197	1.94938	1.01081	1.36692	0.341628	0.999952
+pH fractionation/SP	Q13123	Q13123	AAFQYGIK	[K].AAFQYGIK.[M]		0.000246334	1	21	-1.51657	-0.503385	1.33687	0.789865	1.01319	0.417346	0.839014	-5.01199	-2.50795		1.02898	2.50404		NA
+pH fractionation/SP	Q96CT7	Q96CT7	AAFTAFEEAQLPR	[R].AAFTAFEEAQLPR.[L]		0	1	10	-3.20826	-1.38808	0.166599	2.73293	1.82018	0.313693	0.820259	0.901288	1.35623	1.80688	0.8396	0.454939	0.71267	0.999952
+pH fractionation/SP	P02768	P02768	AAFTECCQAADK	[K].AAFTECCQAADK.[A]	2xCarbamidomethyl [C6; C7]	3.35083e-05	1	10	3.35479	3.00869	1.26966	2.23512	-0.346102	0.827051	0.949362	4.43834	5.2951	2.09289	1.02886	0.85676	0.559162	0.999952
+pH fractionation/SP	P19623	P19623	AAFVLPEFAR	[R].AAFVLPEFAR.[K]		4.19381e-05	1	16	-2.43199	-1.00216	0.437199	3.92133	1.42982	0.54341	0.86875	-0.19789	1.59379	2.79949	0.0430685	1.79168	0.45369	0.999952
+pH fractionation/SP	Q92925	Q92925; Q92925-3; Q92925-2	AAFYHQPWAQEAVGR	[R].AAFYHQPWAQEAVGR.[H]		4.19381e-05	1	2	-3.28889						NA	0.708682	1.3385	2.61764	0.663973	0.629817	0.772876	0.999952
+pH fractionation/SP	Q9BZV1	Q9BZV1; Q9BZV1-2	AAGAEPDSILKPELLSAIEK	[K].AAGAEPDSILKPELLSAIEK.[L]		0	1	4	1.92567	0.0689217	0.797197	1.87502	-1.85675	0.205732	0.818997	-0.482211	-0.991163	1.61491	0.616594	-0.508952	0.710506	0.999952
+pH fractionation/SP	P68104	P68104-2; P68104; Q5VTE0	AAGAGKVTK	[K].AAGAGKVTK.[S]		0.0012854	1	2	0.508148	0.275941	0.320445		-0.232207		NA	0.395439	-1.64293			-2.03837		NA
+pH fractionation/SP	Q9NSD9	Q9NSD9	AAGASDVVLYK	[K].AAGASDVVLYK.[I]		3.35083e-05	1	28	0.326684	-0.45127	0.505143	0.688139	-0.777954	0.189597	0.818997	-0.260843	-1.52912	1.03275	1.13334	-1.26828	0.362631	0.999952
+pH fractionation/SP	Q3LXA3	Q3LXA3; Q3LXA3-2	AAGDGDCGTTHSR	[R].AAGDGDCGTTHSR.[A]	1xCarbamidomethyl [C7]	0.000224101	1	2	-3.1704	-1.36094	1.56957	1.30649	1.80946	0.336827	0.823994	-0.436529		0.57127				NA
+pH fractionation/SP	O95786	O95786; O95786-2	AAGFDEIEQDLTQR	[R].AAGFDEIEQDLTQR.[F]		0	1	2	4.53314	1.02472	0.686237	0.803196	-3.50842	0.00452921	0.563079	2.18753	0.51546	2.04768	3.16311	-1.67207	0.484999	0.999952
+pH fractionation/SP	P22102	P22102	AAGFKDPLLASGTDGVGTK	[K].AAGFKDPLLASGTDGVGTK.[L]		0	1	3	-1.57511	-1.30439	0.639205	1.06856	0.27072	0.72561	0.917606	-1.45999	-0.936952	0.642141	0.886962	0.523038	0.454554	0.999952
+pH fractionation/SP	Q0VDF9	Q0VDF9	AAGFNVLR	[R].AAGFNVLR.[L]		0.000877399	1	3	0.507461	1.20059	0.403367	1.47781	0.693132	0.587761	0.880727							NA
+pH fractionation/SP	P56182	P56182	AAGGFTHDELLK	[R].AAGGFTHDELLK.[V]		0	1	18	-0.962685	-1.11992	0.677479	1.43387	-0.157233	0.87199	0.964773	-0.733591	-1.14182	1.71233	0.479558	-0.408224	0.77625	0.999952
+pH fractionation/SP	Q14761	Q14761	AAGGQGLHVTAL	[R].AAGGQGLHVTAL.[-]		0.000169063	1	8	-1.34543	0.238052	1.40233	1.54709	1.58348	0.25929	0.818997	1.00529	1.48822	1.3138	0.254701	0.482933	0.658615	0.999952
+pH fractionation/SP	Q9Y490	Q9Y490	AAGHPGDPESQQR	[K].AAGHPGDPESQQR.[L]		0	1	10	1.52863	-0.796642	0.86727	3.21113	-2.32528	0.289476	0.819326	-1.51141	-1.04117	1.41629	1.25737	0.470236	0.759027	0.999952
+pH fractionation/SP	P28838	P28838; P28838-2	AAGIDEQENWHEGK	[K].AAGIDEQENWHEGK.[E]		0	1	8	-1.91129	-3.19797	0.240098		-1.28668		NA	-2.15982	-1.7178	0.81116	0.404056	0.44202	0.561609	0.999952
+pH fractionation/SP	P28838	P28838; P28838-2	AAGIDEQENWHEGKENIR	[K].AAGIDEQENWHEGKENIR.[A]		0	1	5	-0.842028	-2.92233	1.41043	3.51585	-2.0803	0.400851	0.835149	-1.90109	-2.82847		1.15937	-0.92738		NA
+pH fractionation/SP	Q99459	Q99459	AAGIEIQK	[R].AAGIEIQK.[K]		0.00896334	1	4	-1.42914	-4.20571	0.465997		-2.77656		NA	-2.54066	-3.95108	1.24092	1.56465	-1.41042	0.423106	0.999952
+pH fractionation/SP	P30566	P30566-2; P30566	AAGIIHLGATSCYVGDNTDLIILR	[K].AAGIIHLGATSCYVGDNTDLIILR.[N]	1xCarbamidomethyl [C12]	0	1	5	-2.08265	-1.71646	0.86429	0.23963	0.366188	0.518483	0.861685							NA
+pH fractionation/SP	Q9UHA3	Q9UHA3	AAGKELTVDNSFEFEK	[K].AAGKELTVDNSFEFEK.[R]		0.000877399	1	1		-1.3575					NA	-0.866614	-0.964386	1.24074	0.681941	-0.0977714	0.931106	0.999952
+pH fractionation/SP	P62424	P62424	AAGKGDVPTKRPPVLR	[K].AAGKGDVPTKRPPVLR.[A]		8.08306e-05	1	2	0.75077	1.72845	0.419881	0.962015	0.97768	0.18198	0.818997	2.58772	3.09209	2.23191	0.70004	0.504365	0.72775	0.999952
+pH fractionation/SP	O75533	O75533	AAGLATMISTMRPDIDNMDEYVR	[K].AAGLATMISTMRPDIDNMDEYVR.[N]		0	1	7	1.96576	0.565096	1.92685	1.97985	-1.40067	0.429454	0.839816	2.48209	-0.395722		1.27917	-2.87781		NA
+pH fractionation/SP	P07199	P07199	AAGLPVK	[R].AAGLPVK.[G]		0.00329207	1	1	2.56662	-0.809658	0.619429		-3.37628		NA	-0.441796	-1.19921	0.910842		-0.757409		NA
+pH fractionation/SP	Q14676	Q14676; Q14676-2; Q14676-3	AAGNPGSLAAPIDHKPCSAPLEPK	[R].AAGNPGSLAAPIDHKPCSAPLEPK.[S]	1xCarbamidomethyl [C17]	3.35083e-05	1	5	-1.96116	1.19994			3.1611		NA	0.818005	-0.428947	0.174367	0.772005	-1.24695	0.155706	0.999952
+pH fractionation/SP	Q96KM6	Q96KM6	AAGPASPPEEDPER	[K].AAGPASPPEEDPER.[T]		0.000224101	1	1		-0.803678					NA	-0.423139	-0.853491	1.59642	0.701355	-0.430352	0.760385	0.999952
+pH fractionation/SP	Q460N5	Q460N5-1; Q460N5-4; Q460N5; Q460N5-3	AAGPELQADCDQIVK	[K].AAGPELQADCDQIVK.[R]	1xCarbamidomethyl [C10]	4.19381e-05	1	1	0.202617	-1.09831	0.530494		-1.30093		NA	-2.48639	-2.64986	1.52857	0.765449	-0.163469	0.900979	0.999952
+pH fractionation/SP	O14497	O14497; O14497-3; O14497-2	AAGPGLGNVAMGPR	[R].AAGPGLGNVAMGPR.[Q]		0	1	9	0.0159398	0.770406	1.28351	0.151633	0.754466	0.369164	0.829318	-1.12793	-1.74424	2.29984	0.972257	-0.616309	0.753227	0.999952
+pH fractionation/SP	Q9BQ69	Q9BQ69	AAGPLLTDECR	[R].AAGPLLTDECR.[T]	1xCarbamidomethyl [C10]	0.000177325	1	1	0.287318	-0.444591	0.15152	1.7611	-0.73191	0.512909	0.861207	-0.897545	-0.853206	0.957049	0.633668	0.0443388	0.949866	0.999952
+pH fractionation/SP	P27694	P27694	AAGPSLSHTSGGTQSK	[K].AAGPSLSHTSGGTQSK.[V]		0	1	14	-0.603901	-1.90787	0.173677	0.667272	-1.30397	0.0306271	0.791941	-1.16443	-1.45479		1.20315	-0.290353		NA
+pH fractionation/SP	Q96L91	Q96L91-3; Q96L91-5; Q96L91; Q96L91-2; Q96L91-4	AAGQTVVAQPVHMQQLLK	[K].AAGQTVVAQPVHMQQLLK.[L]		3.35083e-05	1	2	0.35982	-1.85444		3.28696	-2.21426		NA							NA
+pH fractionation/SP	Q7L1T6	Q7L1T6	AAGSDGTELFDQVHR	[R].AAGSDGTELFDQVHR.[W]		0	1	2	0.0854895	-0.380448	1.17837	1.17829	-0.465937	0.653501	0.898702	-1.11202	-1.91874	2.04761	0.331092	-0.806723	0.635811	0.999952
+pH fractionation/SP	O75369-8	O75369-9; O75369-5; O75369-2; O75369-8; O75369-7; O75369-4; O75369-6; O75369; O75369-3	AAGSGELGVTMK	[K].AAGSGELGVTMK.[G]		3.35083e-05	1	12	1.18401	0.0551661	0.783894	1.41678	-1.12884	0.319436	0.820259	-0.247675	0.378132	1.40696	0.340617	0.625807	0.597746	0.999952
+pH fractionation/SP	P05386	P05386	AAGVNVEPFWPGLFAK	[K].AAGVNVEPFWPGLFAK.[A]		0	1	19	-1.89503	-1.492	0.781607	0.850351	0.403025	0.578193	0.87835	-1.4226	-2.03324	1.21564	0.662673	-0.610638	0.57408	0.999952
+pH fractionation/SP	Q9Y230	Q9Y230; Q9Y230-2	AAGVVLEMIR	[R].AAGVVLEMIR.[E]		4.19381e-05	1	17	0.594136	0.390961	0.624453	0.385577	-0.203176	0.673602	0.903728	0.198181	1.16053	1.46861	0.488777	0.962349	0.342141	0.999952
+pH fractionation/SP	P33316	P33316-2; P33316	AAGYDLYSAYDYTIPPMEK	[R].AAGYDLYSAYDYTIPPMEK.[A]		0	1	3	0.674611	-1.2414	0.230394	1.86517	-1.91601	0.150638	0.818997	-0.873242	-3.20542	2.29334	2.1179	-2.33218	0.325451	0.999952
+pH fractionation/SP	Q9H9Y6-3	Q9H9Y6-3; Q9H9Y6-4; Q9H9Y6-5; Q9H9Y6-2; Q9H9Y6	AAGYNFYGTER	[K].AAGYNFYGTER.[L]		4.19381e-05	1	4	-0.20963	-0.254161	0.150186	1.57292	-0.044531	0.963408	0.989639	-0.527816	-0.538052	0.931407	0.318222	-0.0102366	0.986491	0.999952
+pH fractionation/SP	O14646	O14646-2; O14646	AAHFDIDWGK	[K].AAHFDIDWGK.[E]		0.000398881	1	5	4.64534	5.48852	0.310071	1.14204	0.84318	0.284712	0.819124	6.14483	5.36902	1.53279	1.69581	-0.775808	0.588221	0.999952
+pH fractionation/SP	Q53H12	Q53H12	AAHFFSTLK	[K].AAHFFSTLK.[E]		0.000246334	1	3	2.40768	2.30139	0.741984	0.92754	-0.10629	0.884334	0.967985	1.91687	1.26241	1.27304	0.820831	-0.654465	0.495842	0.999952
+pH fractionation/SP	Q9UJX2	Q9UJX2; Q9UJX2-2	AAHFLHGCNSK	[R].AAHFLHGCNSK.[K]	1xCarbamidomethyl [C8]	4.19381e-05	1	3	-3.12282	0.191235	1.06633	5.88712	3.31406	0.51545	0.86143	4.45595	3.68077	0.398402	1.07653	-0.775186	0.418933	0.999952
+pH fractionation/SP	Q15021	Q15021	AAHGFDWEEER	[K].AAHGFDWEEER.[Q]		0.00663116	1	3	2.20106	-0.489159	0.315958	2.53622	-2.69022	0.275015	0.818997	-2.47813	-2.975			-0.496871		NA
+pH fractionation/SP	Q8WZA9	Q8WZA9	AAHGVLLQALDEMR	[R].AAHGVLLQALDEMR.[A]		4.19381e-05	1	3	2.21692	-0.516021	0.521509	5.51975	-2.73294	0.441345	0.843493	-0.0698638	0.238979	1.61277	0.887698	0.308843	0.785819	0.999952
+pH fractionation/SP	O43795	O43795; O43795-2	AAHIFNEALVCHQIR	[K].AAHIFNEALVCHQIR.[Y]	1xCarbamidomethyl [C11]	0	1	2	0.341994	-0.292505	0.305021		-0.634499		NA	-0.854582	-1.91441	0.769869	2.8486	-1.05983	0.567583	0.999952
+pH fractionation/SP	Q9UQ80	Q9UQ80; Q9UQ80-2	AAHLCAEAALR	[K].AAHLCAEAALR.[L]	1xCarbamidomethyl [C5]	4.19381e-05	1	10	0.882703	0.957912	1.22107	1.40067	0.0752086	0.947477	0.985136	2.17008	0.841042	1.4762	0.53622	-1.32904	0.326521	0.999952
+pH fractionation/SP	P78371	P78371-2; P78371	AAHSEGNTTAGLDMR	[R].AAHSEGNTTAGLDMR.[E]		0	1	31	-0.664126	-2.91663	0.89534	2.02606	-2.2525	0.286995	0.819124	-2.71649	-3.5686	1.65455	1.36627	-0.852108	0.592746	0.999952
+pH fractionation/SP	P78371	P78371-2; P78371	AAHSEGNTTAGLDMR	[R].AAHSEGNTTAGLDMR.[E]	1xOxidation [M14]	4.19381e-05	1	6	0.534611	-0.288691	0.054756	2.53158	-0.823302	0.6034	0.885181	0.362567	-0.79299	2.43725	0.499377	-1.15556	0.466207	0.999952
+pH fractionation/SP	P04049-2	P04049; P04049-2	AAHTEDINACTLTTSPR	[R].AAHTEDINACTLTTSPR.[L]	1xCarbamidomethyl [C10]	3.35083e-05	1	2	-0.306034	-2.73337	0.348667	3.87036	-2.42734	0.340165	0.824734	-5.51601	-3.09485	1.38378	0.610806	2.42116	0.0669524	0.999952
+pH fractionation/SP	P61764-2	P61764; P61764-2	AAHVFFTDSCPDALFNELVK	[R].AAHVFFTDSCPDALFNELVK.[S]	1xCarbamidomethyl [C10]	0.000236593	1	2	-0.781676	-0.747695	0.116101	0.741227	0.0339815	0.93767	0.982651	-0.945113	-2.31084			-1.36573		NA
+pH fractionation/SP	Q2TAY7	Q2TAY7	AAIAQALAGEVSVVPPSR	[R].AAIAQALAGEVSVVPPSR.[L]		0	1	20	3.89309	3.51769	0.4661	1.8078	-0.3754	0.745188	0.923728	2.70478	1.34539	2.05159	0.961227	-1.35939	0.357379	0.999952
+pH fractionation/SP	Q96PK6	Q96PK6-2; Q96PK6; RBM14_5527_E1	AAIAQLNGK	[K].AAIAQLNGK.[E]		0.000261709	1	16		0.965901					NA	-1.47014	-0.697366	0.133484	2.43707	0.772769	0.699412	0.999952
+pH fractionation/SP	P35637; Q92804	P35637-2; Q92804-2; P35637; Q92804	AAIDWFDGK	[K].AAIDWFDGK.[E]		4.19381e-05	2	72	0.590257	0.983841	0.571119	0.54577	0.393584	0.436829	0.841805	1.24448	0.918917	0.442762	0.720007	-0.325567	0.541199	0.999952
+pH fractionation/SP	Q92804	Q92804-2; Q92804	AAIDWFDGKEFHGNIIK	[K].AAIDWFDGKEFHGNIIK.[V]		0	1	4	-1.29173	-0.514463	0.786423	0.973243	0.777266	0.342529	0.824783	0.553889	-1.20904	0.229229	1.10297	-1.76293	0.0535096	0.999952
+pH fractionation/SP	P35637	P35637-2; P35637	AAIDWFDGKEFSGNPIK	[K].AAIDWFDGKEFSGNPIK.[V]		0	1	16	-2.61598	-1.45113	0.531509	0.700094	1.16484	0.143897	0.818997	-1.62148	-0.468213	1.00649	0.252692	1.15327	0.126557	0.999952
+pH fractionation/SP	P35637	P35637-2; P35637	AAIDWFDGKEFSGNPIKVSFATR	[K].AAIDWFDGKEFSGNPIKVSFATR.[R]		0	1	1	-1.10567	-1.43702	0.222175	3.0932	-0.33135	0.862183	0.961772	-1.03167	-2.08941		1.70445	-1.05774		NA
+pH fractionation/SP	Q9UHB9	Q9UHB9; Q9UHB9-4; Q9UHB9-2	AAIEAFNK	[K].AAIEAFNK.[C]		0.000413649	1	8	2.05798	2.1206	0.529748	1.5496	0.0626161	0.950376	0.985794	1.88175	1.71147	0.552826	0.698955	-0.170278	0.75729	0.999952
+pH fractionation/SP	Q8N556-2	Q8N556; Q8N556-2	AAIEVNAGR	[R].AAIEVNAGR.[K]		0.00283099	1	1		-3.70155					NA	-2.0832	-0.991493	1.20733	0.540021	1.09171	0.226028	0.999952
+pH fractionation/SP	P07741	P07741-2; P07741	AAIGLLAR	[R].AAIGLLAR.[H]		0.000236593	1	26	0.686564	0.26521	1.21582	0.246605	-0.421353	0.587956	0.880727	0.739939	0.682879	0.63869	0.178028	-0.0570594	0.914259	0.999952
+pH fractionation/SP	Q9Y2W6	Q9Y2W6	AAIHQILTENTPVSEQLSVPQR	[K].AAIHQILTENTPVSEQLSVPQR.[S]		0	1	2	1.56457	3.00723	0.872151	1.66647	1.44267	0.254739	0.818997	3.32306	3.71489	2.01935	1.48529	0.391823	0.799994	0.999952
+pH fractionation/SP	P35232	P35232	AAIISAEGDSK	[K].AAIISAEGDSK.[A]		4.19381e-05	1	15	0.363742	-1.59012	0.966638	3.18011	-1.95386	0.366168	0.829318	-0.064325	0.244655	1.6112	1.16306	0.30898	0.801006	0.999952
+pH fractionation/SP	Q9P2E9	Q9P2E9-3; Q9P2E9	AAILETAPK	[K].AAILETAPK.[E]		0.000246334	1	7	-3.18951	-1.09888			2.09063		NA	-0.709437	-0.622892	1.05135	0.39183	0.0865447	0.898859	0.999952
+pH fractionation/SP	O14744	O14744-3; O14744-5; O14744; O14744-2	AAILPTSIFLTNK	[K].AAILPTSIFLTNK.[K]		3.35083e-05	1	14	-0.755576	-1.2499	0.562071	1.76472	-0.494326	0.667899	0.902366	-2.66773	-1.75119	2.51475	0.901016	0.91654	0.584307	0.999952
+pH fractionation/SP	Q96I25	Q96I25	AAIPPPVYEEQDRPR	[K].AAIPPPVYEEQDRPR.[S]		4.19381e-05	1	10	-3.00628	-2.0802	0.365847	2.29438	0.92608	0.629735	0.891803	-1.24373	-0.468998	1.14431	0.663061	0.774728	0.367669	0.999952
+pH fractionation/SP	O60645	O60645-3; O60645; O60645-2	AAIQSQLDGVR	[K].AAIQSQLDGVR.[T]		0.000398881	1	6	-3.35691	-4.0775	2.52405		-0.720591		NA	-3.34246		0.903929				NA
+pH fractionation/SP	Q7Z3J2	Q7Z3J2; Q7Z3J2-2	AAISLVPEVPK	[K].AAISLVPEVPK.[M]		0.00220886	1	3	-0.0095672	-0.584226	2.58696		-0.574659		NA	-1.74555	-1.07869	1.94391		0.666852		NA
+pH fractionation/SP	O95747	O95747	AAISQLR	[K].AAISQLR.[S]		0.0068102	1	4	0.0222887	-1.03648	0.102591	1.30958	-1.05877	0.235193	0.818997	-0.151611	-2.6786	1.30375		-2.52699		NA
+pH fractionation/SP	O75175	O75175	AAISSGIEDPVPTLHLTER	[R].AAISSGIEDPVPTLHLTER.[D]		0	1	4	-0.878269	0.38203	0.190765	0.483567	1.2603	0.0228783	0.753807	-2.07196	-0.981947	2.93586	0.9482	1.09002	0.567258	0.999952
+pH fractionation/SP	O00534	O00534	AAITFLK	[K].AAITFLK.[S]		0.00623633	1	1	1.27361	-1.52385	1.7355	0.763247	-2.79747	0.13086	0.818997	-1.4662	-3.91913	0.714539	3.44679	-2.45293	0.428278	0.999952
+pH fractionation/SP	Q9UNX4	Q9UNX4	AAITTLK	[K].AAITTLK.[Y]		0.00629975	1	7	-2.54487	-0.897757		2.01366	1.64711		NA	-1.93526	-0.777058	2.71815	1.49193	1.15821	0.650081	0.999952
+pH fractionation/SP	Q7Z417	Q7Z417	AAIVYHTK	[R].AAIVYHTK.[E]		0.00116616	1	1	-2.31641	-1.51283	0.613654	0.184543	0.803581	0.184208	0.818997	-4.10763	-3.10619	0.629964	1.05253	1.00144	0.32457	0.999952
+pH fractionation/SP	P19338	P19338	AAKEAMEDGEIDGNKVTLDWAKPK	[K].AAKEAMEDGEIDGNKVTLDWAKPK.[G]		0	1	4	-2.29705	-4.46314		4.77715	-2.16609		NA		-5.80936					NA
+pH fractionation/SP	Q99986	Q99986	AAKPEQIQK	[R].AAKPEQIQK.[W]		4.19381e-05	1	13	-0.392251	0.211412	0.107381	2.38749	0.603663	0.664831	0.901323	0.609822	1.42438	2.00972	0.0702921	0.814556	0.624503	0.999952
+pH fractionation/SP	Q9HA77	Q9HA77	AALADDFDTPR	[K].AALADDFDTPR.[V]		4.19381e-05	1	5	-3.07985	-2.29144	0.381009		0.788406		NA	-1.61404						NA
+pH fractionation/SP	Q9HC35	Q9HC35; Q9HC35-2	AALADVLR	[K].AALADVLR.[R]		0.000387362	1	1	-3.67171	-2.3391	0.717608	0.202834	1.33261	0.127343	0.818997		-3.19419					NA
+pH fractionation/SP	Q9H1K1	ISCU_2068_E0; Q9H1K1-2; Q9H1K1	AALADYK	[K].AALADYK.[L]		0.00780514	1	2	-5.2579	3.00815			8.26605		NA	2.86363	2.48389	2.81012	3.13561	-0.37974	0.899532	0.999952
+pH fractionation/SP	Q32P44	Q32P44-3; Q32P44; Q32P44-2	AALAEALR	[K].AALAEALR.[L]		0.000542627	1	2	-3.55518	-0.980986	0.572748	2.64351	2.57419	0.174618	0.818997	0.590907	1.23526	0.581876	0.886084	0.644356	0.480581	0.999952
+pH fractionation/SP	Q96SY0	Q96SY0-4; Q96SY0-3; Q96SY0	AALAFGFLDLLK	[K].AALAFGFLDLLK.[G]		3.35083e-05	1	4	-0.036925	0.576666	0.252796	0.637311	0.613591	0.209367	0.818997	-1.46871	-1.94107	2.01844	0.694368	-0.472356	0.716414	0.999952
+pH fractionation/SP	Q15102	Q15102	AALAGHPR	[R].AALAGHPR.[A]		0.000776576	1	9	1.88883	-1.10219	0.784086	2.9995	-2.99102	0.174056	0.818997	-1.85836		4.48671				NA
+pH fractionation/SP	Q15149	Q15149-4; Q15149; Q15149-6; Q15149-9; Q15149-3; Q15149-8; Q15149-5; Q15149-7; Q15149-2	AALAHSEEVTASQVAATK	[R].AALAHSEEVTASQVAATK.[T]		0	1	5		1.34774					NA	1.07146	0.212091	0.697515	0.678158	-0.859367	0.262839	0.999952
+pH fractionation/SP	P20248	P20248	AALAVLK	[R].AALAVLK.[S]		0.00721299	1	2	2.24038	1.21926	0.31752	3.31338	-1.02111	0.623315	0.889861	0.884359	-0.530037	0.682511	2.31272	-1.4144	0.362729	0.999952
+pH fractionation/SP	O75533	O75533-2; O75533	AALDEAQGVGLDSTGYYDQEIYGGSDSR	[K].AALDEAQGVGLDSTGYYDQEIYGGSDSR.[F]		0	1	6	1.81249	0.192336	0.466499	1.23495	-1.62015	0.115654	0.818997	1.08738	-1.3619		0.48669	-2.44928		NA
+pH fractionation/SP	P15428	P15428; P15428-5; P15428-4; P15428-2	AALDEQFEPQK	[K].AALDEQFEPQK.[T]		4.19381e-05	1	3	3.29735	1.6951	0.50103	0.643562	-1.60225	0.050249	0.818997	1.06817	2.15686	1.62784	0.445305	1.08868	0.443213	0.999952
+pH fractionation/SP	Q15424-3	Q15424; Q15424-3; Q15424-2; Q15424-4	AALDER	[R].AALDER.[Y]		0.00995925	1	1	-2.14328	-0.367215			1.77607		NA	-1.68997	-1.53863	0.774664	1.39184	0.151335	0.881524	0.999952
+pH fractionation/SP	P09417	P09417; P09417-2	AALDGTPGMIGYGMAK	[K].AALDGTPGMIGYGMAK.[G]		0	1	3	-2.77658	-2.13517	0.772111	0.250611	0.641407	0.35684	0.827497		-4.37919					NA
+pH fractionation/SP	Q8NFW8	Q8NFW8; Q8NFW8-2	AALDSGAFQSVWVSTDHDEIENVAK	[R].AALDSGAFQSVWVSTDHDEIENVAK.[Q]		0	1	11	-4.41674	-3.62217	0.746456	0.0769415	0.794565	0.139525	0.818997	-0.303802	-0.00465587	0.610967	1.26241	0.299146	0.783213	0.999952
+pH fractionation/SP	Q86UK7	Q86UK7; Q86UK7-2; Q86UK7-3	AALEAAAAAAPER	[R].AALEAAAAAAPER.[G]		4.19381e-05	1	7	-0.626448	1.14281	0.338317	4.55182	1.76926	0.516401	0.861497	2.96382	4.59432	3.48879	0.645447	1.6305	0.470614	0.999952
+pH fractionation/SP	P11766	P11766	AALEACHK	[R].AALEACHK.[G]	1xCarbamidomethyl [C6]	0.000420983	1	7	2.32903	-1.17164	0.290849	3.34866	-3.50067	0.143629	0.818997	2.35593						NA
+pH fractionation/SP	P46020	P46020-3; P46020-2; P46020	AALEALDELDLFGVK	[K].AALEALDELDLFGVK.[G]		0.000177325	1	1	-2.60814	-0.448242	1.49593	1.51272	2.1599	0.153494	0.818997	-1.22272	-1.81052	0.396167	1.81844	-0.587801	0.697112	0.999952
+pH fractionation/SP	P34897	P34897; P34897-3; P34897-2	AALEALGSCLNNK	[R].AALEALGSCLNNK.[Y]	1xCarbamidomethyl [C9]	0	1	18	1.27184	0.823728	0.66188	1.24787	-0.448117	0.611911	0.887809	-0.898543	-0.645126	0.628062	0.532087	0.253417	0.622124	0.999952
+pH fractionation/SP	Q12788	Q12788	AALEALLPYTER	[R].AALEALLPYTER.[H]		0	1	16	-3.09968	-0.788909		1.28628	2.31077		NA	-2.34353	-0.761824	0.67411	0.556275	1.58171	0.0350303	0.999952
+pH fractionation/SP	O95319-2	O95319-2; O95319-3; O95319; NAPOR-1_2571_I1; O95319-4; O95319-5	AALEAQNALHNIK	[K].AALEAQNALHNIK.[T]		0	1	71	-2.0824	0.389871	0.628337	1.12396	2.47228	0.0292287	0.786668	2.7517	2.32117	0.0567615	0.19707	-0.430528	0.0639433	0.999952
+pH fractionation/SP	Q92879-4	Q92879-6; Q92879-3; Q92879; Q92879-5; Q92879-2; Q92879-4	AALEAQNALHNMK	[K].AALEAQNALHNMK.[V]		0	1	26	2.66976	2.34507	0.454662	1.58128	-0.324696	0.7497	0.925104	1.74695	2.20949	0.943689	0.736873	0.462542	0.540053	0.999952
+pH fractionation/SP	Q92922	Q92922	AALEEFSR	[K].AALEEFSR.[V]		0.000192563	1	28	-0.502719	0.931138	1.88898	1.66919	1.43386	0.380299	0.831052	1.48213	1.37642	4.1883	4.43944	-0.105708	0.977505	0.999952
+pH fractionation/SP	P12081	P12081-3; P12081-4; P12081-2; P12081	AALEELVK	[R].AALEELVK.[L]		0.000360009	1	22	0.0411175	0.309916	0.0594297	0.328419	0.268799	0.22952	0.818997	-1.87255	-3.45793	3.06636	0.823116	-1.58537	0.426712	0.999952
+pH fractionation/SP	Q15057	Q15057	AALEEVEGDVAELELK	[R].AALEEVEGDVAELELK.[L]		0	1	2	2.48279	0.28653	0.0853495	1.44688	-2.19626	0.058519	0.818997	0.730786	-0.0763815	1.65872	0.170964	-0.807167	0.448979	0.999952
+pH fractionation/SP	Q15149	Q15149-4; Q15149; Q15149-6; Q15149-9; Q15149-3; Q15149-8; Q15149-5; Q15149-7; Q15149-2	AALEEVER	[K].AALEEVER.[L]		0.0054721	1	1							NA	-1.92228		0.321335				NA
+pH fractionation/SP	Q9H0D6	Q9H0D6; Q9H0D6-2	AALEEVYPDLTPEETR	[R].AALEEVYPDLTPEETR.[R]		0	1	18	-0.704589	0.696986	0.119376	2.08673	1.40158	0.310043	0.819451	1.50073	2.71732	2.24989	0.636959	1.21659	0.418458	0.999952
+pH fractionation/SP	Q9H0D6	Q9H0D6; Q9H0D6-2	AALEEVYPDLTPEETRR	[R].AALEEVYPDLTPEETRR.[N]		4.19381e-05	1	4	-1.87346	-1.4292	1.46175	0.590194	0.444259	0.651011	0.897925	-1.6593	-1.4453	3.44064	0.540094	0.214002	0.93867	0.999952
+pH fractionation/SP	Q9NRV9	Q9NRV9	AALEGTATYR	[R].AALEGTATYR.[G]		0.00121573	1	2	-2.65169	-1.08091	1.17035	1.81588	1.57078	0.276377	0.819124	0.00780906	-0.612133	0.213687	0.527723	-0.619942	0.132364	0.999952
+pH fractionation/SP	Q92797	Q92797-2; Q92797	AALEQLLK	[K].AALEQLLK.[F]		0.00037496	1	13	0.142952	0.988674	0.121038	0.517111	0.845722	0.0602236	0.818997	0.782369	-2.99596			-3.77833		NA
+pH fractionation/SP	O75643	O75643-2; O75643	AALETDENLLLCAPTGAGK	[R].AALETDENLLLCAPTGAGK.[T]	1xCarbamidomethyl [C12]	0	1	20	0.631262	-0.0604809	0.381228	1.97474	-0.691743	0.583427	0.879661	-1.07697	-2.21992	2.00723	0.673915	-1.14295	0.511221	0.999952
+pH fractionation/SP	P42345	P42345	AALETVDR	[K].AALETVDR.[L]		0.00124955	1	1	-1.39589	-1.1761	0.213709		0.219792		NA		-4.99964					NA
+pH fractionation/SP	Q9BRX8	Q9BRX8; Q9BRX8-2	AALEYLEDIDLK	[K].AALEYLEDIDLK.[T]		3.35083e-05	1	6	-2.92318	-1.73343	2.30601	2.42806	1.18975	0.571583	0.876043	-1.71462	-0.465889	1.1612	1.83788	1.24873	0.407313	0.999952
+pH fractionation/SP	Q99707	Q99707-2; Q99707	AALFALQNLFEEK	[K].AALFALQNLFEEK.[Y]		3.35083e-05	1	3	1.83897	1.85311	1.03033	1.42157	0.0141386	0.989539	0.996967	1.36238	-0.295424	1.99804	0.761402	-1.65781	0.25044	0.999952
+pH fractionation/SP	Q12872-2	Q12872; Q12872-2	AALFLQTLK	[K].AALFLQTLK.[N]		9.74898e-05	1	7	1.24387	0.707457	0.854791	2.19044	-0.536409	0.712909	0.913604	0.924384	1.51235	2.47398	1.97735	0.587962	0.763895	0.999952
+pH fractionation/SP	Q15024	Q15024	AALFNTR	[K].AALFNTR.[I]		0.0022992	1	4	-2.83678	-2.09701	0.426853	0.749844	0.739767	0.307048	0.819326	-1.50956	-1.6026	1.2834	0.924162	-0.0930465	0.929296	0.999952
+pH fractionation/SP	P11172	P11172; UMPS_2718_I1; UMPS_2718_E1	AALGPLVTGLYDVQAFK	[R].AALGPLVTGLYDVQAFK.[F]		0	1	11	4.47062	4.55867	0.252291	0.497546	0.0880443	0.798108	0.939816	4.79545	3.43352	0.928635	1.42694	-1.36193	0.238129	0.999952
+pH fractionation/SP	P22570-3	P22570-4; P22570-7; P22570-5; P22570; P22570-2; P22570-3; P22570-6	AALGVLR	[K].AALGVLR.[Q]		0.00632904	1	4	-2.00538	-3.95825	2.22672	0.522036	-1.95287	0.212351	0.818997	-1.81655						NA
+pH fractionation/SP	P14317	P14317	AALGYDYK	[K].AALGYDYK.[G]		0.000605261	1	15	0.277978	1.12074	0.752937	1.55664	0.842765	0.446105	0.844451	1.92182	2.07685	1.26453	0.55467	0.155029	0.855292	0.999952
+pH fractionation/SP	P41227	P41227	AALHLYSNTLNFQISEVEPK	[R].AALHLYSNTLNFQISEVEPK.[Y]		0	1	5	-0.589407	-1.47489	2.93029	4.09429	-0.88548	0.77585	0.933117	-0.537616	-1.11739	2.26933	3.4631	-0.579776	0.820292	0.999952
+pH fractionation/SP	Q9UPN3-5	MACF1_2894_I1; Q9UPN3-5; Q9UPN3-3; Q9UPN3-2	AALLDQALSNAR	[K].AALLDQALSNAR.[L]		4.19381e-05	1	6	0.208412	-0.0118994	0.280842	0.942006	-0.220311	0.717645	0.915044	-0.0887188	-0.873953	0.762425	1.7714	-0.785234	0.519562	0.999952
+pH fractionation/SP	Q9C0C9	Q9C0C9	AALLEAGMPECTEDK	[R].AALLEAGMPECTEDK.[-]	1xCarbamidomethyl [C11]	0	1	5	-1.70533	-2.2604			-0.555071		NA	-1.95541	-1.20828	0.544911	0.879953	0.747127	0.312286	0.999952
+pH fractionation/SP	Q96EV2	RBM33_5130_I2; Q96EV2; RBM33_5130_E2	AALLEFEER	[K].AALLEFEER.[E]		0.000318209	1	5	-0.324102	0.385331	0.251066	2.53913	0.709433	0.655262	0.899252	1.51822	3.01358	1.58217	0.12367	1.49536	0.178008	0.999952
+pH fractionation/SP	Q13813; Q13813-2	Q13813-3; Q13813; Q13813-2	AALLELWELR	[R].AALLELWELR.[R]		4.19381e-05	2	16	-0.0190676	1.14744	0.752242	0.570347	1.16651	0.0990572	0.818997	2.56512	0.445521	1.93971	0.308904	-2.1196	0.241199	0.999952
+pH fractionation/SP	P78346-2	P78346-2; P78346	AALLHGETR	[R].AALLHGETR.[K]		4.19381e-05	1	14	2.03867	0.313114	0.584813	3.02788	-1.72556	0.387343	0.831888	-0.978065	-0.590663	2.2974	2.96965	0.387401	0.866848	0.999952
+pH fractionation/SP	P07814	P07814	AALLNQHYQVNFK	[K].AALLNQHYQVNFK.[G]		0	1	20	0.937469	0.0923674	0.617741	0.455373	-0.845102	0.202092	0.818997	0.63458	-0.122207	0.132888		-0.756787		NA
+pH fractionation/SP	P35251	P35251; P35251-2	AALLSGPPGVGK	[K].AALLSGPPGVGK.[T]		0.000177325	1	10	-2.32325	-1.47046	0.920482	1.98256	0.852793	0.53625	0.866755	-0.199851	0.449745	2.22537	0.10574	0.649596	0.640096	0.999952
+pH fractionation/SP	Q9Y5B9	Q9Y5B9	AALLTER	[R].AALLTER.[T]		0.00235332	1	10	4.5591	2.77772	0.625411	2.77836	-1.78138	0.339563	0.824522	0.323236	0.66474	6.73457	1.39676	0.341504	0.93226	0.999952
+pH fractionation/SP	Q14980-2; Q14980	NUMA1_2515_I0; Q14980-3; Q14980-2; Q14980-4; Q14980; NUMA1_2515_E0	AALMESQGQQQEER	[R].AALMESQGQQQEER.[G]		0	2	10		-2.49835		3.67147			NA	0.527981	0.947814	0.658869	1.01107	0.419833	0.647717	0.999952
+pH fractionation/SP	Q3ZAQ7	Q3ZAQ7	AALNALQPPEFR	[K].AALNALQPPEFR.[N]		4.19381e-05	1	7	-1.56326	-2.72186	0.0598455		-1.1586		NA	-1.1972						NA
+pH fractionation/SP	Q6PGP7	Q6PGP7	AALNELLK	[K].AALNELLK.[H]		0.000815592	1	2	0.756993	0.285465	0.773926	1.58155	-0.471528	0.66688	0.901859	-1.61561	-1.72924	1.05953	0.419553	-0.113626	0.898582	0.999952
+pH fractionation/SP	O95602	O95602	AALNLPEAASYDEVR	[R].AALNLPEAASYDEVR.[G]		0	1	8	3.17294	3.14301	0.387714	0.13197	-0.0299358	0.905365	0.974009	2.8936	3.60932	0.271489	0.342675	0.715722	0.0470792	0.999952
+pH fractionation/SP	Q13217	Q13217	AALPDLTK	[K].AALPDLTK.[V]		0.000877399	1	3	-1.15064	0.267798	2.19204	0.752485	1.41844	0.348881	0.824979	0.0318377	-0.960413	0.970397	1.36322	-0.992251	0.447254	0.999952
+pH fractionation/SP	Q7Z6Z7	Q7Z6Z7-2; Q7Z6Z7; Q7Z6Z7-3	AALPLTTSDTK	[K].AALPLTTSDTK.[T]		4.19381e-05	1	5	6.49594	6.0652	0.413074	1.62137	-0.430736	0.678745	0.904835	5.70283	5.84327	1.55042	0.794208	0.140438	0.895696	0.999952
+pH fractionation/SP	O00139-2	O00139-4; O00139; O00139-1; O00139-2; O00139-5	AALQEEEQASK	[R].AALQEEEQASK.[Q]		4.19381e-05	1	7	-1.74118	-2.33173	0.0239695		-0.590547		NA		-4.99271					NA
+pH fractionation/SP	P49327	P49327	AALQEELQLCK	[R].AALQEELQLCK.[G]	1xCarbamidomethyl [C10]	4.19381e-05	1	6	1.80136	1.3898	0.368112	0.332286	-0.411565	0.223953	0.818997	0.806682	1.82618	0.988638	0.682495	1.0195	0.215535	0.999952
+pH fractionation/SP	P62851	P62851	AALQELLSK	[R].AALQELLSK.[G]		4.19381e-05	1	53	0.41664	0.12649	0.460332	1.38111	-0.29015	0.747328	0.924483	-0.728292	-0.413745	1.8932	0.849653	0.314547	0.805869	0.999952
+pH fractionation/SP	O60287	O60287	AALQILKPEEHMYLK	[K].AALQILKPEEHMYLK.[V]		3.35083e-05	1	2	-3.48461	-0.334581	0.414162	3.6894	3.15003	0.33638	0.823994	4.22164	2.30969	0.479526	1.86775	-1.91195	0.26947	0.999952
+pH fractionation/SP	Q8WZA9	Q8WZA9	AALQSQAEALR	[R].AALQSQAEALR.[R]		4.19381e-05	1	4	-0.0631473	0.562595	1.20272	1.55142	0.625743	0.641652	0.895195	-0.104621	1.37391	2.00543	0.503903	1.47854	0.401939	0.999952
+pH fractionation/SP	Q9H2Y7	Q9H2Y7; Q9H2Y7-2	AALQTAYVEVQR	[R].AALQTAYVEVQR.[L]		4.19381e-05	1	1		-0.470746					NA	-1.18917	-0.553005	1.56318	0.723153	0.636161	0.639653	0.999952
+pH fractionation/SP	P78527	P78527-2; P78527	AALSALESFLK	[K].AALSALESFLK.[Q]		3.35083e-05	1	17	-2.6254	-1.54809	0.500648	1.13122	1.07731	0.205951	0.818997	-1.21658	-0.154292	0.942098	0.240862	1.06229	0.131423	0.999952
+pH fractionation/SP	O95831	O95831; O95831-4; O95831-6; O95831-3	AALSASEGEEVPQDK	[K].AALSASEGEEVPQDK.[A]		0	1	7	0.110601	-1.50642	0.267283	1.62103	-1.61702	0.162516	0.818997	-0.523387	-2.67018		0.766659	-2.1468		NA
+pH fractionation/SP	O95831	O95831; O95831-4; O95831-6; O95831-3	AALSASEGEEVPQDKAPSHVPFLLIGGGTAAFAAAR	[K].AALSASEGEEVPQDKAPSHVPFLLIGGGTAAFAAAR.[S]		0	1	1	1.92923	-1.82229	1.71118		-3.75151		NA	-1.68342	-1.30746	2.08541	0.0334805	0.375963	0.82448	0.999952
+pH fractionation/SP	Q04637-9; Q04637-8	Q04637-6; Q04637-9; Q04637; Q04637-3; Q04637-8; Q04637-4; Q04637-5; Q04637-7	AALSEEELEKK	[K].AALSEEELEKK.[S]		4.19381e-05	2	5	0.291346	-1.04482	0.0538641		-1.33617		NA							NA
+pH fractionation/SP	O43432-3	O43432; O43432-3; O43432-4	AALSEEELER	[K].AALSEEELER.[K]		0.000114852	1	1	-2.18345	-1.94411	2.82123		0.239335		NA							NA
+pH fractionation/SP	Q9UIA9	Q9UIA9	AALSGSYVNFGVFR	[K].AALSGSYVNFGVFR.[L]		4.19381e-05	1	2	-4.74899	-0.191114	0.208967	2.96608	4.55788	0.162466	0.818997	1.09296	0.735384	0.075224	0.825768	-0.357574	0.602751	0.999952
+pH fractionation/SP	Q14978-2; Q14978-3	Q14978; Q14978-2; Q14978-3	AALSLPAK	[K].AALSLPAK.[Q]		0.000360009	2	31	0.0235063	-3.05132	0.535244	2.24078	-3.07483	0.0903325	0.818997	-2.7733	-5.4593	1.30404	1.06171	-2.68599	0.152405	0.999952
+pH fractionation/SP	P61201-2	P61201; P61201-2	AALSSFQK	[K].AALSSFQK.[V]		0.000862413	1	3		-2.72831		1.42714			NA	-2.31682	-3.51625	3.01449	2.42083	-1.19943	0.703697	0.999952
+pH fractionation/SP	Q6Y7W6	Q6Y7W6-4; Q6Y7W6-5; Q6Y7W6-3; Q6Y7W6	AALSSQQQQQLALLLQQFQTLK	[K].AALSSQQQQQLALLLQQFQTLK.[M]		0	1	1	-4.3027	-2.15756	0.659897	0.597398	2.14514	0.0763629	0.818997	-3.85654	-2.30039			1.55615		NA
+pH fractionation/SP	P55084	P55084-2; P55084	AALTGLLHR	[R].AALTGLLHR.[T]		9.74898e-05	1	26	1.65395	1.08469	0.21858	2.06915	-0.569259	0.660293	0.89981	0.397644	0.152606	1.30742	0.653626	-0.245038	0.785973	0.999952
+pH fractionation/SP	O94832	O94832	AALTIIR	[K].AALTIIR.[Y]		0.00468806	1	3	-1.99424	-0.392015	1.18523	0.0666148	1.60222	0.167617	0.818997	0.155928	-2.55823		1.4517	-2.71416		NA
+pH fractionation/SP	Q9BUE6-2	Q9BUE6; Q9BUE6-2	AALTLTPSAVNK	[R].AALTLTPSAVNK.[I]		0.00107635	1	1		-3.53797		0.480599			NA	1.22653	0.507908	0.400753	1.88722	-0.718621	0.64819	0.999952
+pH fractionation/SP	O95248-4	O95248-5; SBF1_1514_I2; O95248; SBF1_1514_E2; O95248-4	AALYILGDK	[R].AALYILGDK.[A]		6.09156e-05	1	2	-0.304559	-2.10611	0.009297		-1.80155		NA							NA
+pH fractionation/SP	Q08211	Q08211; Q08211-2	AAMEALVVEVTK	[R].AAMEALVVEVTK.[Q]	1xOxidation [M3]	0	1	11	-3.29023	-0.808332	1.14368	1.25918	2.4819	0.0648617	0.818997	-2.07782	1.17158	1.24411	0.375513	3.2494	0.0123414	0.999952
+pH fractionation/SP	Q08211	Q08211; Q08211-2	AAMEALVVEVTK	[R].AAMEALVVEVTK.[Q]		0	1	21	-0.82351	0.320338	0.156029	1.11766	1.14385	0.154004	0.818997	-0.521248	-0.264142	1.23788	1.27713	0.257106	0.81463	0.999952
+pH fractionation/SP	Q9UPR0	Q9UPR0; Q9UPR0-3; Q9UPR0-2	AAMEFHEHLHSIGTK	[K].AAMEFHEHLHSIGTK.[E]	1xOxidation [M3]	4.19381e-05	1	1	-0.137787	-0.708256	2.07622	3.29084	-0.570468	0.812064	0.945333	2.39057	-3.00686		0.00644469	-5.39742		NA
+pH fractionation/SP	Q9Y490	Q9Y490	AAMEPIVISAK	[R].AAMEPIVISAK.[T]		4.19381e-05	1	15	-0.189983	0.169874	0.322327	1.12896	0.359856	0.623612	0.889919	-1.81131	-0.781837	2.46005	1.5213	1.02948	0.570939	0.999952
+pH fractionation/SP	Q9Y490	Q9Y490	AAMEPIVISAK	[R].AAMEPIVISAK.[T]	1xOxidation [M3]	4.19381e-05	1	4	7.20726	5.87981	0.0547143	2.66391	-1.32745	0.436851	0.841805	4.81891	3.43623	2.12748	0.432626	-1.38268	0.331881	0.999952
+pH fractionation/SP	O60725	O60725	AAMFTAGSNFNHVVQNEK	[K].AAMFTAGSNFNHVVQNEK.[S]		0	1	3	-1.24668	-1.82616	1.33133	0.874209	-0.579475	0.633045	0.892661	-1.97354	-3.78696	0.0887784	2.2698	-1.81342	0.376105	0.999952
+pH fractionation/SP	Q96G03	Q96G03	AAMGPGISR	[R].AAMGPGISR.[M]		0.00030511	1	10	0.692788	0.93173	0.209004	1.31205	0.238942	0.758257	0.927858	1.05942	-0.338311	1.32282	4.71448	-1.39773	0.646934	0.999952
+pH fractionation/SP	Q6KC79	Q6KC79-3; Q6KC79-2; Q6KC79	AAMYDIISSPSK	[K].AAMYDIISSPSK.[D]		4.19381e-05	1	5		-0.400744					NA	-0.835926	-0.118544	1.45369	0.202728	0.717382	0.557024	0.999952
+pH fractionation/SP	Q8NE71	Q8NE71-2; Q8NE71	AANAAENDFSVSQAEMSSR	[K].AANAAENDFSVSQAEMSSR.[Q]		0	1	7	-3.68523	-3.59085	2.28592	3.08364	0.0943805	0.968072	0.99054	-0.0335648	-3.29207	0.0677622	2.77985	-3.2585	0.213902	0.999952
+pH fractionation/SP	P42765	P42765	AANDAGYFNDEMAPIEVK	[K].AANDAGYFNDEMAPIEVK.[T]		0	1	5	-3.83697	-2.96253	1.71463	0.61587	0.874443	0.452535	0.847226	-1.98079	-3.1855	0.522872	0.182429	-1.20472	0.0295184	0.999952
+pH fractionation/SP	Q16566	Q16566	AANFVHMDTAQK	[K].AANFVHMDTAQK.[K]		0.00124955	1	1	-2.22078	-3.35579	3.24022	0.459143	-1.13501	0.671931	0.903401	-3.1676	-5.26043	1.81862		-2.09283		NA
+pH fractionation/SP	P25787	P25787	AANGVVLATEK	[K].AANGVVLATEK.[K]		4.19381e-05	1	15	-2.3311	-2.65516	0.331516	0.992671	-0.324061	0.620176	0.889421		-1.26068		1.88017			NA
+pH fractionation/SP	P25787	P25787	AANGVVLATEKK	[K].AANGVVLATEKK.[Q]		4.19381e-05	1	3	-2.42166	2.19983	0.868328	2.55163	4.6215	0.053439	0.818997	2.37233	2.41392	2.60463	2.63181	0.0415818	0.985413	0.999952
+pH fractionation/SP	P12931-2; P07947	P12931-2; P07947; P12931	AANILVGENLVCK	[R].AANILVGENLVCK.[VI]	1xCarbamidomethyl [C12]	4.19381e-05	2	1	-1.26916	-1.76595	0.738703		-0.496787		NA	0.241143	-1.88485	1.11727		-2.12599		NA
+pH fractionation/SP	P06239-3	P06239-3; P06239	AANILVSDTLSCK	[R].AANILVSDTLSCK.[I]	1xCarbamidomethyl [C12]	0	1	11	-1.69162	-0.299057	0.710923	0.550505	1.39256	0.0550837	0.818997	-0.457517	-1.76801	0.514278	0.627316	-1.31049	0.0489011	0.999952
+pH fractionation/SP	P08574	P08574	AANNGALPPDLSYIVR	[R].AANNGALPPDLSYIVR.[A]		0.000849071	1	1	-0.666286		0.569681				NA	-1.65633	-1.89176	1.19411	1.17859	-0.235432	0.842189	0.999952
+pH fractionation/SP	Q9BV44	Q9BV44	AANNIASLLTK	[R].AANNIASLLTK.[S]		4.19381e-05	1	8	-2.29498	-3.7696	0.335635		-1.47462		NA	-5.71052		0.438504				NA
+pH fractionation/SP	Q8IY81	Q8IY81	AANPVDFLSK	[R].AANPVDFLSK.[A]		4.19381e-05	1	22	7.31517	3.82937	0.735777	2.67145	-3.4858	0.0948604	0.818997	3.8717	1.29029	2.27517	2.37199	-2.58141	0.245332	0.999952
+pH fractionation/SP	Q5VZL5	ZMYM4_6409_E2; Q5VZL5; Q5VZL5-4; Q5VZL5-2	AANQVEETLHTHLPQTPETNFR	[K].AANQVEETLHTHLPQTPETNFR.[-D]		0	1	2		-1.30655		0.702864			NA	0.600786	-0.152687	0.598858	1.12081	-0.753473	0.362473	0.999952
+pH fractionation/SP	Q9Y4L1	Q9Y4L1	AANSLEAFIFETQDK	[K].AANSLEAFIFETQDK.[L]		0	1	10	0.710989	-1.1277	0.264755	1.02276	-1.83869	0.0492134	0.818997		-0.358933		0.317479			NA
+pH fractionation/SP	P50750-2	P50750-2; P50750	AANVLITR	[K].AANVLITR.[D]		0.00116616	1	3	-3.98085	-1.78301	0.597155	2.06123	2.19784	0.284504	0.819124	-0.0307157	-0.0462585	3.69917	1.95217	-0.0155428	0.995173	0.999952
+pH fractionation/SP	Q9Y6E0	Q9Y6E0; Q9Y6E0-2	AANVLLSEHGEVK	[K].AANVLLSEHGEVK.[L]		4.19381e-05	1	11	-1.44754	-0.609854	0.598463	1.82926	0.83769	0.487938	0.855268	-2.05119	-2.20471		0.796285	-0.153524		NA
+pH fractionation/SP	Q9P289	O00506-3; O00506; Q9P289-2; O00506-2; Q9P289; Q9P289-3	AANVLLSEQGDVK	[K].AANVLLSEQGDVK.[L]		3.35083e-05	1	12	0.68959	-0.428794	1.00538	1.54879	-1.11838	0.353349	0.826476	1.09034	-0.0372631	0.656707	1.3705	-1.1276	0.268108	0.999952
+pH fractionation/SP	O75489	O75489	AANWYER	[K].AANWYER.[E]		0.00230962	1	5	1.47857	-1.16839	0.296017	3.39606	-2.64696	0.249853	0.818997	0.0396209	0.217226	0.619479	1.13562	0.177605	0.823718	0.999952
+pH fractionation/SP	Q8NCN4	Q8NCN4	AAPAEPDFIFR	[R].AAPAEPDFIFR.[A]		4.19381e-05	1	1		-1.9391					NA	-1.98315	-1.4465	3.45484	0.846954	0.536648	0.850452	0.999952
+pH fractionation/SP	Q8NF37	Q8NF37	AAPASSAGASDAR	[R].AAPASSAGASDAR.[L]		4.19381e-05	1	3	-0.209133	0.27018	0.912573		0.479313		NA	-4.35103	-3.32772			1.02331		NA
+pH fractionation/SP	P55084	P55084	AAPAVQTK	[R].AAPAVQTK.[T]		0.00995925	1	2	-2.92311	0.66094	1.17631	3.47697	3.58405	0.301375	0.819326	1.66613	2.98281	3.09801	0.588414	1.31668	0.509578	0.999952
+pH fractionation/SP	Q9UKV3; Q9UKV3-5	Q9UKV3; Q9UKV3-3; Q9UKV3-5; Q9UKV3-2	AAPCIYWLPLTDSQIVQK	[K].AAPCIYWLPLTDSQIVQK.[E]	1xCarbamidomethyl [C4]	0	2	6	-1.27175	2.96971	0.545286		4.24145		NA	2.65733	3.92525	3.04822	0.744073	1.26792	0.522553	0.999952
+pH fractionation/SP	Q96GQ7	Q96GQ7	AAPDILIATPGR	[R].AAPDILIATPGR.[L]		4.19381e-05	1	15		1.96827					NA	1.09724	-0.582711	0.341762	2.46337	-1.67995	0.429647	0.999952
+pH fractionation/SP	P31146	P31146	AAPEASGTPSSDAVSR	[R].AAPEASGTPSSDAVSR.[L]		0	1	29	-1.84017	-3.32356	1.6874	2.90368	-1.48339	0.486888	0.85501	-0.371114	-2.85073	0.327326	3.09321	-2.47962	0.37665	0.999952
+pH fractionation/SP	P31146	P31146	AAPEASGTPSSDAVSRLEEEMR	[R].AAPEASGTPSSDAVSRLEEEMR.[K]	1xOxidation [M21]	4.19381e-05	1	5	-2.19583	-0.844666			1.35117		NA	-2.06313	-1.10185	0.754591	0.204089	0.961276	0.224149	0.999952
+pH fractionation/SP	P31146	P31146	AAPEASGTPSSDAVSRLEEEMR	[R].AAPEASGTPSSDAVSRLEEEMR.[K]		0	1	19	-2.52187	0.469204	1.13892	3.15394	2.99108	0.197243	0.818997	2.76728	3.31187	2.43757	0.971513	0.544588	0.737419	0.999952
+pH fractionation/SP	Q96JP5	Q96JP5; Q96JP5-2	AAPEEPQQRPPEAVAAAPAGTTSSR	[K].AAPEEPQQRPPEAVAAAPAGTTSSR.[V]		0	1	4	-3.36751	2.0153	1.55812		5.38281		NA	0.00440699	1.05066	2.62358	0.938677	1.04625	0.63981	0.999952
+pH fractionation/SP	Q8IVP5	Q8IVP5	AAPEINNLIEEATEFIK	[K].AAPEINNLIEEATEFIK.[Q]		0	1	1	-1.3262	-0.20227	1.07894	1.17366	1.12393	0.348788	0.824979	0.22396	0.418539	1.12011	0.0984007	0.194579	0.831028	0.999952
+pH fractionation/SP	Q92947	Q92947; Q92947-2	AAPEMVSLLK	[K].AAPEMVSLLK.[R]		0.000236593	1	10	-0.751176	-1.03303	0.711239	0.23446	-0.281858	0.550032	0.87029	-1.79795	-1.53509	1.32275	1.02568	0.262862	0.79908	0.999952
+pH fractionation/SP	A0FGR8-2	A0FGR8-2	AAPENPGGVLSVELPGLLAQLAR	[R].AAPENPGGVLSVELPGLLAQLAR.[S]		0.00839135	1	1	-1.95055	-0.437076	0.668261	1.33083	1.51348	0.246049	0.818997	1.34706	1.48134	1.14133	0.429157	0.134287	0.858012	0.999952
+pH fractionation/SP	Q15181	Q15181	AAPFSLEYR	[R].AAPFSLEYR.[V]		0.000177325	1	23	-1.83419	-0.493068	0.311441	1.64428	1.34113	0.231823	0.818997	-0.594851	-0.119668	1.32766	0.64001	0.475183	0.606338	0.999952
+pH fractionation/SP	Q15233	Q15233; Q15233-2	AAPGAEFAPNK	[R].AAPGAEFAPNK.[R]		4.19381e-05	1	18	1.2748	1.00278	0.387482	0.0840692	-0.272018	0.420547	0.839322	0.776639	1.40757	1.38754	0.196927	0.630928	0.586705	0.999952
+pH fractionation/SP	Q15233	Q15233; Q15233-2	AAPGAEFAPNKR	[R].AAPGAEFAPNKR.[R]		0	1	18	-5.10527	-1.84034	0.0629554	3.00148	3.26493	0.240599	0.818997	1.16689	0.617282	0.753979	1.39034	-0.549613	0.654459	0.999952
+pH fractionation/SP	Q15120-2	Q15120-2; Q15120	AAPLAGFGYGLPISR	[R].AAPLAGFGYGLPISR.[L]		3.35083e-05	1	2	-2.13755	-2.08433	1.40012	0.524691	0.0532193	0.953198	0.986393	-0.675542	-2.68359			-2.00805		NA
+pH fractionation/SP	Q92610	Q92610	AAPLIVEVFNK	[K].AAPLIVEVFNK.[V]		4.19381e-05	1	4		-0.637299		3.28811			NA	0.033996	2.75067	2.28777	0.827314	2.71667	0.125212	0.999952
+pH fractionation/SP	P54619-3	Q9UGI9-2; P54619-2; P54619-3; P54619; Q9UGI9	AAPLWDSK	[R].AAPLWDSK.[K]		0.00293532	1	7	0.670516	-0.396829	0.777479	2.54588	-1.06735	0.525603	0.863341	0.099062	0.689795	2.04019	0.70738	0.590733	0.731063	0.999952
+pH fractionation/SP	Q9HAF1-3	Q9HAF1-3; Q9HAF1-2; Q9HAF1-4; Q9HAF1	AAPPQIPDTR	[K].AAPPQIPDTR.[R]		0.00142448	1	4	-1.83135	-0.351358	0.915119	3.08447	1.47999	0.470215	0.851239	0.991607	1.84774	0.805613	2.65047	0.856134	0.620823	0.999952
+pH fractionation/SP	O75691	O75691	AAPPTAGSMAIEK	[K].AAPPTAGSMAIEK.[Y]		0.000877399	1	3	-3.8922	-2.3292		1.20187	1.563		NA	-1.6386	-2.03777	1.66589	2.86325	-0.399168	0.844871	0.999952
+pH fractionation/SP	Q9Y6H1	Q5T1J5; Q9Y6H1	AAPRPAPVAQPPAAAPPSAVGSSAAAPR	[R].AAPRPAPVAQPPAAAPPSAVGSSAAAPR.[Q]		0	1	1	0.792408	0.75474	0.868203	1.36363	-0.0376678	0.975164	0.992342	0.112609	0.82733	1.81632	0.599724	0.714721	0.552774	0.999952
+pH fractionation/SP	Q96T58	Q96T58	AAPTPTPAPVPVPVPLPAPAPAPHGEAR	[K].AAPTPTPAPVPVPVPLPAPAPAPHGEAR.[I]		0	1	4	-5.33191	-0.698489			4.63342		NA		-2.73263		2.76109			NA
+pH fractionation/SP	Q13123	Q13123	AAPTSAPPSK	[R].AAPTSAPPSK.[S]		0.000318209	1	2	4.03571	3.17976	0.233475	0.637498	-0.855946	0.0943514	0.818997	2.72511	2.85157	0.709869	0.531205	0.126461	0.817034	0.999952
+pH fractionation/SP	P11586	P11586	AAQAPSSFQLLYDLK	[R].AAQAPSSFQLLYDLK.[L]		0	1	12	1.89902	1.01186	0.466441	1.0239	-0.887158	0.380834	0.831052	-0.0697026	-1.24465			-1.17495		NA
+pH fractionation/SP	P11586	P11586	AAQAPSSFQLLYDLKLPVEDKIR	[R].AAQAPSSFQLLYDLKLPVEDKIR.[I]		0	1	1	-2.2284		0.982356				NA	-2.11591						NA
+pH fractionation/SP	P37837	P37837	AAQASDLEK	[K].AAQASDLEK.[I]		0.000236593	1	11	1.96589	-1.69857	0.812647	3.31606	-3.66446	0.141905	0.818997	-2.11402		2.95399				NA
+pH fractionation/SP	P37837	P37837	AAQASDLEKIHLDEK	[K].AAQASDLEKIHLDEK.[S]		0	1	3	-0.0512584	-0.0048958	0.21184	1.08177	0.0463626	0.945424	0.984558	0.996862	1.48719	1.28933	0.695691	0.490326	0.593207	0.999952
+pH fractionation/SP	P06132	UROD_2774_E2; UROD_2774_I2; P06132	AAQDFFSTCR	[R].AAQDFFSTCR.[S]	1xCarbamidomethyl [C9]	4.19381e-05	1	13	-2.98812	-0.0948589	1.32004	2.1096	2.89326	0.146454	0.818997	-0.0401453	1.11233	2.61746	0.600479	1.15247	0.498577	0.999952
+pH fractionation/SP	O94906	O94906-2; O94906	AAQDLCEEALR	[R].AAQDLCEEALR.[H]	1xCarbamidomethyl [C6]	4.19381e-05	1	8	0.506714	0.523722	0.9931	0.504303	0.0170082	0.980166	0.993741	1.53987	3.03006	3.55914	0.557359	1.49018	0.513309	0.999952
+pH fractionation/SP	P62995	P62995-3; P62995	AAQDRDQIYR	[R].AAQDRDQIYR.[R]		0.000246334	1	10	-1.13761	-1.91243	5.31074	1.62994	-0.774818	0.815958	0.946936	-2.18258	-0.162953	4.06637		2.01962		NA
+pH fractionation/SP	P04075-2	P04075; P04075-2	AAQEEYVK	[K].AAQEEYVK.[R]		0.000246334	1	17	2.83193	0.00937122	0.747186	2.70692	-2.82256	0.156665	0.818997	0.333371	-2.80099	1.87644	4.12822	-3.13436	0.312324	0.999952
+pH fractionation/SP	P04075-2	P04075; P04075-2	AAQEEYVKR	[K].AAQEEYVKR.[A]		0.000177325	1	13	0.0241113	-1.8909	0.431364	2.0753	-1.91501	0.191597	0.818997	0.808433						NA
+pH fractionation/SP	Q99543	Q99543; Q99543-2	AAQEQVLNASR	[K].AAQEQVLNASR.[A]		4.19381e-05	1	8	3.0452	3.14001	0.80851	1.34829	0.0948083	0.925371	0.980168	2.69068	4.06596	1.70874	0.230014	1.37528	0.361151	0.999952
+pH fractionation/SP	Q5JTH9	Q5JTH9-3; Q5JTH9-2; Q5JTH9	AAQHGVCSVLK	[K].AAQHGVCSVLK.[G]	1xCarbamidomethyl [C7]	0.00223086	1	2	2.51593	3.04317	0.247491	0.268413	0.527239	0.0666775	0.818997	3.08377	3.15685	0.546236	0.533671	0.0730771	0.876397	0.999952
+pH fractionation/SP	Q13952	Q13952-6; Q13952-7; Q13952-5; Q13952-3; Q13952-2; Q13952	AAQIFITELTLR	[K].AAQIFITELTLR.[A]		4.19381e-05	1	3	-3.5744	-2.3469	2.6619	1.74579	1.2275	0.566847	0.87551	-0.924253	0.789402			1.71366		NA
+pH fractionation/SP	P62910	P62910	AAQLAIR	[R].AAQLAIR.[V]		0.00173252	1	35	-1.43901	-1.12049	1.85913	0.50586	0.318524	0.836895	0.953331	-2.23093	-1.28326		0.242848	0.947667		NA
+pH fractionation/SP	Q15075	Q15075	AAQLATEIADIK	[K].AAQLATEIADIK.[S]		4.19381e-05	1	1	0.570305	-1.84493	0.0488715	3.50944	-2.41524	0.29918	0.819326	0.425114	-1.74743	1.9473	3.8755	-2.17254	0.434565	0.999952
+pH fractionation/SP	P19367-3	P19367; P19367-3; P19367-4; P19367-2	AAQLCGAGMAAVVDK	[R].AAQLCGAGMAAVVDK.[I]	1xCarbamidomethyl [C5]	3.35083e-05	1	4	-2.37093	-1.6781	0.763152	1.35902	0.692828	0.484298	0.854836	-0.925342	-0.182831	0.97501	0.840464	0.742511	0.374298	0.999952
+pH fractionation/SP	P09622	P09622-3; P09622	AAQLGFK	[K].AAQLGFK.[T]		0.00159148	1	21	2.75755	2.7886	0.0638372	1.47301	0.0310427	0.972657	0.992032	0.368678	1.36055	3.3701	0.9167	0.991869	0.648566	0.999952
+pH fractionation/SP	Q16204	Q16204	AAQLQHSEK	[R].AAQLQHSEK.[M]		0.000177325	1	2	-2.92909	-0.572479	1.46248		2.35661		NA	-2.59727	-2.87201	1.58602	1.02494	-0.27474	0.856026	0.999952
+pH fractionation/SP	Q969V3	Q969V3-2; Q969V3	AAQLVDKDSTFLSTLEHHLSR	[R].AAQLVDKDSTFLSTLEHHLSR.[Y]		0	1	1	-1.43855	-0.185963	0.524716	0.704725	1.25258	0.069001	0.818997	-1.43413	-1.89958	1.1567	0.518489	-0.465445	0.642324	0.999952
+pH fractionation/SP	Q96PK6	Q96PK6	AAQMHSGYQR	[R].AAQMHSGYQR.[R]		4.19381e-05	1	7	1.97935	1.62759	0.773565	1.43273	-0.351763	0.727252	0.917877	0.171031	0.491487	1.21152	1.02414	0.320456	0.744075	0.999952
+pH fractionation/SP	Q68CQ4	Q68CQ4	AAQMLQSNK	[R].AAQMLQSNK.[N]		9.74898e-05	1	1		1.16476					NA	-0.196977	0.124735	2.28758	0.612886	0.321712	0.865393	0.999952
+pH fractionation/SP	Q96B54	Q96B54	AAQPPAQPCQLCGR	[R].AAQPPAQPCQLCGR.[S]	2xCarbamidomethyl [C9; C12]	4.19381e-05	1	4	0.756358	-0.956409	0.631362	1.12372	-1.71277	0.108503	0.818997	-1.39721	-1.44166	0.985499	0.0547763	-0.0444491	0.955588	0.999952
+pH fractionation/SP	P78563-5	P78563-4; P78563; ADARB1_1075_I2; P78563-3; P78563-5; P78563-2; P78563-6	AAQSALAAIFNLHLDQTPSR	[R].AAQSALAAIFNLHLDQTPSR.[Q]		0	1	4	-3.60379	-2.55937	2.29375	0.420729	1.04443	0.591256	0.881099	-0.122864						NA
+pH fractionation/SP	Q9NUU7	Q9UMR2; Q9UMR2-4; Q9UMR2-2; Q9NUU7	AAQSLLNK	[R].AAQSLLNK.[L]		0.00107635	1	5	2.74821	1.7208	0.0801452	1.30905	-1.0274	0.246348	0.818997	1.13993	1.13104	0.792842	0.555433	-0.00889347	0.988066	0.999952
+pH fractionation/SP	P46459	P46459; P46459-2	AAQSTAMNR	[R].AAQSTAMNR.[H]		0.00557565	1	1	0.206811	0.315501	0.258955		0.10869		NA	-2.40348						NA
+pH fractionation/SP	P30622-2	P30622-2; P30622; P30622-1	AAQTAEDAMQIMEQMTK	[K].AAQTAEDAMQIMEQMTK.[E]		0	1	2	-0.154665	-1.50778	0.0660438	0.455689	-1.35311	0.0533106	0.818997	-2.77351	-2.08419			0.689323		NA
+pH fractionation/SP	Q6NXR4	Q6NXR4	AAQVGLLFLK	[K].AAQVGLLFLK.[L]		0.00341295	1	2	3.26427	3.14092	0.624177	0.616068	-0.123358	0.819504	0.947803	3.32061	4.41787	0.134504	0.265479	1.09726	0.00308597	0.999952
+pH fractionation/SP	Q6PK04	Q6PK04	AAQVTFR	[K].AAQVTFR.[K]		0.00362707	1	4	4.95279	4.98975	0.795895	1.88734	0.0369636	0.976562	0.992711	4.11733	4.03083	0.545205	1.70738	-0.0865019	0.937396	0.999952
+pH fractionation/SP	Q9BTW9-4	Q9BTW9-5; Q9BTW9; Q9BTW9-4	AASAAFQENVGR	[R].AASAAFQENVGR.[Q]		4.19381e-05	1	4	-1.67524	-3.1662	0.694031	0.220043	-1.49097	0.0671593	0.818997	-1.45751	-2.55058			-1.09307		NA
+pH fractionation/SP	O00116	O00116	AASAATAAPTATPAAQESGTIPK	[R].AASAATAAPTATPAAQESGTIPK.[K]		0	1	6	-1.03658	-3.8339			-2.79732		NA	-1.23282	-3.99558		2.40991	-2.76276		NA
+pH fractionation/SP	O75367	O75367-3; H2AFY_203_I0; O75367-2; O75367; H2AFY_203_E0	AASADSTTEGTPADGFTVLSTK	[K].AASADSTTEGTPADGFTVLSTK.[S]		0	1	76	-1.43329	3.33597			4.76926		NA	1.78188	3.76767	4.00384	0.76452	1.98579	0.556721	0.999952
+pH fractionation/SP	O00154	O00154-7; O00154-6; O00154-5; O00154-4; O00154	AASAFFTYVSLSQEGR	[R].AASAFFTYVSLSQEGR.[S]		0	1	9	-0.475983	0.839541			1.31552		NA	-0.689554	-2.81873	1.12244	2.43553	-2.12918	0.241072	0.999952
+pH fractionation/SP	Q96HY6	Q96HY6; Q96HY6-2	AASAGQEPLHNEELAGAGR	[R].AASAGQEPLHNEELAGAGR.[V]		0	1	6	-0.0195174	0.956362	1.59861	2.18591	0.97588	0.597394	0.882855	3.31593	1.34829	1.8697	2.46188	-1.96764	0.414507	0.999952
+pH fractionation/SP	Q9UKM9-2	Q9UKM9-2; RALY_3537_E2	AASAIYR	[R].AASAIYR.[L]		0.00210486	1	9	-3.40883	-3.60317	2.57288	3.37051	-0.194337	0.940542	0.983123	-0.250181	-2.8149	0.735403	2.96502	-2.56472	0.357008	0.999952
+pH fractionation/SP	Q9UKM9	RALY_3537_I2; Q9UKM9	AASAIYSGYIFDYDYYR	[R].AASAIYSGYIFDYDYYR.[D]		0	1	12	-1.43632	-2.13427		1.18135	-0.697947		NA	-1.84288	-1.5708	0.0508176		0.272088		NA
+pH fractionation/SP	Q9BSJ2-4	Q9BSJ2; Q9BSJ2-3; Q9BSJ2-4	AASAPYFEVLEK	[K].AASAPYFEVLEK.[W]		0.000420983	1	2	-1.0482	-0.937963	0.619881	0.827289	0.110238	0.873287	0.965202							NA
+pH fractionation/SP	P13861	P13861-2; P13861	AASAYAVGDVK	[R].AASAYAVGDVK.[C]		0.000114852	1	5	0.417219	-0.371263	1.42276	2.31705	-0.788482	0.659302	0.899477	1.52697	3.24064	1.56615	1.18142	1.71367	0.285895	0.999952
+pH fractionation/SP	P62258	P62258-2; P62258	AASDIAMTELPPTHPIR	[K].AASDIAMTELPPTHPIR.[L]		0	1	75	2.13506	0.500836	1.47894	1.2059	-1.63423	0.212141	0.818997	-0.340836	-1.31286	1.62687	0.601517	-0.972022	0.494545	0.999952
+pH fractionation/SP	P62258	P62258-2; P62258	AASDIAMTELPPTHPIR	[K].AASDIAMTELPPTHPIR.[L]	1xOxidation [M7]	0	1	5	-2.71301	-0.461681	1.57326	1.73667	2.25133	0.171435	0.818997	-0.0386649	0.826098	1.49589	1.2198	0.864763	0.481079	0.999952
+pH fractionation/SP	Q96JM3	Q96JM3	AASDIWKPVLSIDTEPR	[K].AASDIWKPVLSIDTEPR.[K]		0	1	6	-3.72667	-1.95068	0.945678	2.21369	1.77599	0.283597	0.819124	-0.0404947	0.0487108	0.841565	0.162616	0.0892055	0.896485	0.999952
+pH fractionation/SP	Q8IXQ6	Q8IXQ6-2; Q8IXQ6; Q8IXQ6-3	AASEFILGK	[K].AASEFILGK.[S]		0.00200955	1	2	-1.28788	1.71945			3.00733		NA	0.684925	-2.5907	1.85938	3.06589	-3.27562	0.279286	0.999952
+pH fractionation/SP	Q13422-2; Q13422	Q13422-2; IKZF1_3171_I2; Q13422-3; Q13422-5; Q13422-4; Q13422-7; Q13422; Q13422-6; IKZF1_3171_E2	AASENSQDALR	[R].AASENSQDALR.[V]		4.19381e-05	2	16	3.23986	0.933587	0.266246	2.09605	-2.30627	0.262656	0.818997	-1.10836	-0.327131	3.31403		0.781231		NA
+pH fractionation/SP	Q7Z3B3	Q7Z3B3	AASETTTSEGLSNFLK	[K].AASETTTSEGLSNFLK.[S]		0	1	3	0.310086	-0.0358218		3.53478	-0.345908		NA	1.83742	0.21098	1.73211	0.0940463	-1.62644	0.316015	0.999952
+pH fractionation/SP	P16401; P10412; P16403	P16401; P10412; P16403	AASGEAKPK	[K].AASGEAKPK.[AV]		0.000177325	3	6	-2.20513	-1.63488		1.37169	0.570249		NA	-1.15425	0.569556	1.61484	0.241104	1.7238	0.141448	0.999952
+pH fractionation/SP	P09525	P09525	AASGFNAMEDAQTLR	[K].AASGFNAMEDAQTLR.[K]		0	1	2	0.480469	1.16739	0.209434	0.284964	0.686916	0.0504403	0.818997	-0.720562	-0.474975	0.619165	1.57409	0.245586	0.813837	0.999952
+pH fractionation/SP	O15015-2	O15015; O15015-2	AASGTWEDLPTR	[R].AASGTWEDLPTR.[Q]		4.19381e-05	1	2	0.56058	1.15147	0.718834	1.04554	0.590895	0.465107	0.850359	1.68104	1.44544	0.93727	0.9063	-0.235597	0.769931	0.999952
+pH fractionation/SP	P26640	P26640	AASGYPVK	[R].AASGYPVK.[V]		0.00142448	1	4	-0.404073	-1.11829	1.09467	2.27884	-0.714218	0.650236	0.897544	0.0343288	-0.864704	0.768107	1.31375	-0.899033	0.364042	0.999952
+pH fractionation/SP	Q8TEQ6	Q8TEQ6	AASHLLSIHK	[K].AASHLLSIHK.[V]		0.000332976	1	7	-2.91779	-1.67472	1.67031	0.904718	1.24307	0.4199	0.83914	-1.80941	-1.58535	0.339348	0.0354811	0.22406	0.451089	0.999952
+pH fractionation/SP	P23588	P23588; P23588-2	AASIFGGAKPVDTAAR	[R].AASIFGGAKPVDTAAR.[E]		0	1	8	0.583287	-0.390711	1.09624	3.23924	-0.973998	0.647643	0.896721	-3.40722	-2.46446		0.928548	0.942756		NA
+pH fractionation/SP	Q9Y5B9	Q9Y5B9	AASITSEVFNK	[K].AASITSEVFNK.[F]		4.19381e-05	1	33	-2.60181	-1.55399	1.23216	1.15498	1.04782	0.343044	0.824979	-1.46164	-2.71516	3.20454	2.58362	-1.25352	0.625782	0.999952
+pH fractionation/SP	Q92538	Q92538; Q92538-2; Q92538-3	AASIYSSWAEEQR	[R].AASIYSSWAEEQR.[H]		4.19381e-05	1	1	-1.65175	-2.43174	0.48353	1.31481	-0.779992	0.391581	0.832381							NA
+pH fractionation/SP	O96007	O96007	AASLEAVSYAIDTLK	[R].AASLEAVSYAIDTLK.[A]		0	1	11	-2.39885	-2.7291	0.0912991	1.18623	-0.330252	0.655781	0.899252	-0.6788	-3.00441		0.618331	-2.32561		NA
+pH fractionation/SP	Q08378	Q08378-2; Q08378	AASLELSEVK	[K].AASLELSEVK.[K]		9.74898e-05	1	4	-0.121439	-0.531591	0.179852	0.967928	-0.410152	0.510471	0.860545	0.291498	0.482669	0.873922	0.219499	0.19117	0.731884	0.999952
+pH fractionation/SP	Q96N66	Q96N66; Q96N66-2; Q96N66-3	AASLEYDYETIR	[K].AASLEYDYETIR.[N]		4.19381e-05	1	7	0.61432	1.50221	0.892053	1.26383	0.887892	0.376424	0.830314	2.39826	1.72519	0.686038	1.94593	-0.67307	0.602251	0.999952
+pH fractionation/SP	O14521	O14521-4; O14521-2; O14521	AASLHWTSER	[K].AASLHWTSER.[V]		0.000224101	1	12	-2.37974	-1.03357	1.86189	1.84137	1.34616	0.423568	0.839359	-2.79486	-4.13422	0.551565	2.30262	-1.33936	0.497669	0.999952
+pH fractionation/SP	Q04637-9; Q04637-8	Q04637-6; Q04637-9; Q04637; Q04637-3; Q04637-8; Q04637-4; Q04637-5; Q04637-7	AASLTEDR	[K].AASLTEDR.[D]		0.00159148	2	2	3.69501	1.02082	0.63447	2.25791	-2.67419	0.119498	0.818997	0.189145	-0.716849	2.45297	2.05251	-0.905994	0.649388	0.999952
+pH fractionation/SP	P30101	P30101	AASNLRDNYR	[K].AASNLRDNYR.[F]		0.00689962	1	2	-1.63742	-3.56645			-1.92903		NA	-1.11065	-3.76193	1.11441	1.29951	-2.65127	0.0906527	0.999952
+pH fractionation/SP	P53041	P53041	AASNMALGK	[R].AASNMALGK.[F]		0.000246334	1	3	5.30166	6.479	0.386545	1.4168	1.17734	0.237288	0.818997	7.57173	8.63897	2.50359	0.753048	1.06724	0.518549	0.999952
+pH fractionation/SP	O15439	O15439-3; O15439-4; O15439; O15439-2	AASQILILK	[K].AASQILILK.[D]		0.00187141	1	1	-2.89976	0.150608	0.0970024		3.05037		NA	-2.18314	-0.175511	1.39299	0.713753	2.00763	0.166656	0.999952
+pH fractionation/SP	Q9UI08-2	Q9UI08-2; Q9UI08-3; Q9UI08-4; Q9UI08; Q9UI08-5	AASQPPNSSEAGR	[R].AASQPPNSSEAGR.[K]		4.19381e-05	1	1							NA	-2.37659	-0.987643	2.32803		1.38895		NA
+pH fractionation/SP	Q9UI08-2	Q9UI08-2; Q9UI08-3; Q9UI08-4; Q9UI08; Q9UI08-5	AASQSDKPAEK	[K].AASQSDKPAEK.[K]		4.19381e-05	1	2		2.31474					NA	2.17065	0.853983		0.427699	-1.31666		NA
+pH fractionation/SP	O95819-3; O95819-6	O95819-5; O95819-3; O95819; O95819-2; O95819-4; O95819-6	AASSLNLSNGETESVK	[R].AASSLNLSNGETESVK.[T]		0	2	4	-3.41342	-1.78995	0.168028		1.62347		NA							NA
+pH fractionation/SP	Q99575	Q99575	AASVHTVGEDTEETPHR	[K].AASVHTVGEDTEETPHR.[W]		4.19381e-05	1	1	1.01477	1.35429	0.703232	1.11551	0.339511	0.678714	0.904835	0.379914	0.474745	0.831627	1.59497	0.0948313	0.931633	0.999952
+pH fractionation/SP	Q13428-3; Q13428-7	Q13428-5; Q13428-3; Q13428-4; Q13428-7; Q13428-6; Q13428-8; Q13428-2; Q13428	AASVPVK	[K].AASVPVK.[G]		0.0038493	2	3	-1.6948	-1.51558	0.949129		0.17922		NA	-1.63269	-2.77842	0.0549462	1.35784	-1.14573	0.355421	0.999952
+pH fractionation/SP	Q13428-3; Q13428-7	Q13428-5; Q13428-3; Q13428-4; Q13428-7; Q13428-6; Q13428-8; Q13428-2; Q13428	AASVPVKGSLGQGTAPVLPGK	[K].AASVPVKGSLGQGTAPVLPGK.[T]		3.35083e-05	2	3	-3.82517	-1.08739	1.81889	0.976941	2.73778	0.201587	0.818997	0.667296	-0.00919676	1.04357	0.687004	-0.676493	0.434352	0.999952
+pH fractionation/SP	Q9BQF6	Q9BQF6-3; Q9BQF6-4; Q9BQF6; Q9BQF6-2; Q9BQF6-5	AASVQNTVQNLR	[K].AASVQNTVQNLR.[E]		4.19381e-05	1	3		-0.828658		0.102906			NA	1.92203	0.324735		0.0200833	-1.5973		NA
+pH fractionation/SP	O60885	O60885	AASVVQPQPLVVVK	[R].AASVVQPQPLVVVK.[E]		4.19381e-05	1	8	-4.4324	0.0025728		2.3805	4.43498		NA	1.43777	2.24824	1.72183	0.0873853	0.810476	0.461203	0.999952
+pH fractionation/SP	O60885	O60885	AASVVQPQPLVVVKEEK	[R].AASVVQPQPLVVVKEEK.[I]		0.000192563	1	2		0.718813					NA	0.197345	-0.849747	2.28222		-1.04709		NA
+pH fractionation/SP	Q15361	Q15361	AASWESQR	[K].AASWESQR.[A]		0.000940043	1	2	-1.9415	-0.922448	0.125239	2.0493	1.01905	0.552748	0.870926	-1.40211	-2.52467	2.44639	0.300102	-1.12256	0.45406	0.999952
+pH fractionation/SP	O95470	O95470	AASYFGMK	[K].AASYFGMK.[I]		0.000553704	1	2	-1.47061	-1.26119	1.08872	1.57402	0.209423	0.858907	0.960863	-1.56337	-2.90921	1.8476	0.919242	-1.34584	0.321801	0.999952
+pH fractionation/SP	Q9Y3F4-2	Q9Y3F4-2; Q9Y3F4	AATAAADFTAK	[K].AATAAADFTAK.[V]		4.19381e-05	1	15	1.45648	-0.495403			-1.95188		NA	-0.396364	-0.212808	1.61179	0.697515	0.183556	0.893105	0.999952
+pH fractionation/SP	Q15084-5	Q15084-2; Q15084-5; Q15084-3; Q15084-4; Q15084	AATALKDVVK	[K].AATALKDVVK.[V]		4.19381e-05	1	5	2.1346	3.3556	0.803257	0.318833	1.221	0.0706658	0.818997	3.04902	2.47488	0.0619648	0.510561	-0.574145	0.1253	0.999952
+pH fractionation/SP	Q6P1J9	Q6P1J9	AATENIPVVR	[R].AATENIPVVR.[R]		0.000360009	1	10	-2.27923	-1.50138	1.44157	0.185369	0.777845	0.523043	0.862926	0.0981578	-2.52372			-2.62188		NA
+pH fractionation/SP	Q8N9M1	Q8N9M1; Q8N9M1-2	AATESVPCSPSPLAGEIR	[K].AATESVPCSPSPLAGEIR.[R]	1xCarbamidomethyl [C8]	4.19381e-05	1	1	1.35497	1.57215	1.56513	0.346658	0.217185	0.825995	0.949332	0.427952	0.600208	1.92358	1.39345	0.172255	0.921594	0.999952
+pH fractionation/SP	P55263	P55263-4; P55263; P55263-3; P55263-2	AATFFGCIGIDK	[K].AATFFGCIGIDK.[F]	1xCarbamidomethyl [C7]	0.000246334	1	3	0.473313	-0.464369	0.0647903	2.04423	-0.937682	0.471595	0.851614	-0.528248	-1.70791	3.13908	0.603079	-1.17966	0.540832	0.999952
+pH fractionation/SP	Q9HCC0	Q9HCC0-2; Q9HCC0	AATGEEVSAEDLGGADLHCR	[K].AATGEEVSAEDLGGADLHCR.[K]	1xCarbamidomethyl [C19]	0	1	5	2.38643	1.43703	0.379617		-0.949399		NA	0.295796	2.05742	2.86983		1.76163		NA
+pH fractionation/SP	Q15003	Q15003-2; Q15003	AATILTK	[K].AATILTK.[S]		0.00657936	1	3	-1.6847						NA	-0.983673	0.0988612	1.29935	1.25714	1.08253	0.42429	0.999952
+pH fractionation/SP	Q53GS7	Q53GS7-2; Q53GS7	AATIPVSQISTIAGSK	[K].AATIPVSQISTIAGSK.[L]		4.19381e-05	1	1	-3.54542	0.454872		1.1867	4.0003		NA	-0.817984	-0.712954	1.48675	0.915318	0.10503	0.939951	0.999952
+pH fractionation/SP	Q13423	Q13423	AATITPFR	[K].AATITPFR.[K]		0.00327061	1	1	-1.52656	-3.44209		1.15689	-1.91553		NA	-0.753532	0.561515	1.18172	1.66379	1.31505	0.367684	0.999952
+pH fractionation/SP	P13861	P13861-2; P13861	AATIVATSEGSLWGLDR	[R].AATIVATSEGSLWGLDR.[V]		0	1	4	0.119877	0.15206	0.926788	0.238573	0.0321827	0.966322	0.990137	0.0625655	0.0961949	0.609606	0.663328	0.0336294	0.951551	0.999952
+pH fractionation/SP	P50454	P50454	AATLAER	[K].AATLAER.[S]		0.00870853	1	1	1.16228	0.303537	0.0448909	1.74025	-0.858741	0.418477	0.83914	-1.04957	-0.301674	2.32004	0.510631	0.7479	0.69794	0.999952
+pH fractionation/SP	Q14683	Q14683	AATLAQELEK	[R].AATLAQELEK.[F]		6.09156e-05	1	12	4.249	3.70197	0.449331	1.0781	-0.547024	0.46276	0.849564	3.41611	3.34357	0.626979	0.527323	-0.072549	0.885524	0.999952
+pH fractionation/SP	P57740	P57740-3; P57740-2; P57740	AATLEGWK	[R].AATLEGWK.[L]		0.00069846	1	7	2.57891	1.46755	0.163119	1.18831	-1.11136	0.183796	0.818997	1.7007	2.15119	1.12626	0.884973	0.450484	0.614879	0.999952
+pH fractionation/SP	Q99615	Q99615; Q99615-2	AATLMMLGR	[R].AATLMMLGR.[F]		0.000877399	1	2	-3.48007	0.598231		1.4071	4.0783		NA	-0.356089	-2.18675	1.62738	0.788416	-1.83066	0.15439	0.999952
+pH fractionation/SP	Q53H96	Q53H96; Q53H96-2	AATMSAVEAATCR	[R].AATMSAVEAATCR.[A]	1xCarbamidomethyl [C12]	4.19381e-05	1	3	-2.81477	-1.22859	0.899244		1.58618		NA	-1.73687	-2.72014		2.49252	-0.983274		NA
+pH fractionation/SP	Q8N9Z2	Q8N9Z2	AATPTLTTFPTIR	[R].AATPTLTTFPTIR.[V]		4.19381e-05	1	4	-4.07859	-0.318346			3.76024		NA	-1.22884	-0.830184	0.880418	0.602036	0.398659	0.580556	0.999952
+pH fractionation/SP	P13667	P13667	AATQFWR	[R].AATQFWR.[S]		0.0010644	1	20	-0.848612	-0.580589	1.10991	0.0977014	0.268023	0.767655	0.930765	-1.51063	-0.520324	3.05246	0.605035	0.990307	0.696747	0.999952
+pH fractionation/SP	P80303	P80303; P80303-2	AATSDLEHYDK	[K].AATSDLEHYDK.[T]		4.19381e-05	1	7	1.03296	0.463313	0.936384	2.88128	-0.56965	0.755693	0.926994	-2.59102	-1.81038	2.07453	1.11864	0.780648	0.596895	0.999952
+pH fractionation/SP	Q01415	Q01415; Q01415-2	AATSHFNIR	[K].AATSHFNIR.[V]		0.00450464	1	1	0.710193	0.0955424	0.173548	1.55616	-0.61465	0.533876	0.865736	1.26006	-1.63874		1.13523	-2.8988		NA
+pH fractionation/SP	Q14204	Q14204	AATSPALFNR	[R].AATSPALFNR.[C]		4.19381e-05	1	4	0.764745	0.527482	0.173323	2.37113	-0.237263	0.871161	0.96462	1.77144	1.87833	1.00375	1.37741	0.106892	0.918727	0.999952
+pH fractionation/SP	Q96BP3	Q96BP3; Q96BP3-2	AATTIEMK	[R].AATTIEMK.[A]		0.00134244	1	3	-2.99391	-0.859601	2.53716	3.28859	2.13431	0.423749	0.839359	0.915122	1.16114	1.1282	0.863117	0.246017	0.779138	0.999952
+pH fractionation/SP	Q9NUL3	Q9NUL3-7; Q9NUL3-3; Q9NUL3-6; Q9NUL3-4; Q9NUL3-2; Q9NUL3; Q9NUL3-8	AATTVLQELK	[R].AATTVLQELK.[K]		4.19381e-05	1	15	-0.108405	0.706898	0.577004	2.59009	0.815303	0.622796	0.8897	2.12142	3.63484	2.4368	0.581502	1.51341	0.354466	0.999952
+pH fractionation/SP	Q5UIP0	Q5UIP0-2; Q5UIP0	AATVENAVLLETNTVEEK	[K].AATVENAVLLETNTVEEK.[N]		0	1	4	1.13773	1.82558	0.384503	0.297666	0.687847	0.0704374	0.818997	-0.10523	0.0542286	0.930617	0.753577	0.159459	0.844381	0.999952
+pH fractionation/SP	Q7L266	Q7L266	AATVGYGILR	[R].AATVGYGILR.[E]		0.00536438	1	2	2.07542	3.56843			1.49301		NA	3.00343	3.67043	1.55782	0.227155	0.666998	0.607727	0.999952
+pH fractionation/SP	Q86U90	Q86U90	AAVAASVGLSEGPAGSR	[R].AAVAASVGLSEGPAGSR.[S]		0.00733644	1	1	-2.63015	-1.43185	0.710899		1.1983		NA	-2.53397	-2.80471			-0.270744		NA
+pH fractionation/SP	P07910-2	P07910-4; P07910-2; O60812; P07910; B7ZW38; B2RXH8	AAVAGEDGR	[R].AAVAGEDGR.[M]		0.000192563	1	27	-1.70624	-2.84317	0.217616	1.4176	-1.13692	0.241684	0.818997	-2.09146	-3.46185	1.41311	1.28694	-1.37039	0.282127	0.999952
+pH fractionation/SP	P36578	P36578	AAVAGKKPVVGK	[K].AAVAGKKPVVGK.[K]		4.19381e-05	1	1	2.38646	2.01784	0.062479	1.06094	-0.368622	0.580383	0.878747	2.62801	0.746607	0.316959	0.569507	-1.8814	0.00749171	0.999952
+pH fractionation/SP	P22102	P22102	AAVAGLDK	[K].AAVAGLDK.[A]		0.0021851	1	1	-2.09069	-2.72069	0.695243		-0.629999		NA	-5.67138	-4.28291			1.38846		NA
+pH fractionation/SP	P22102	P22102	AAVAGLDKAER	[K].AAVAGLDKAER.[A]		0.00153452	1	1	-1.26272	-1.26612	0.409121		-0.00340418		NA	-0.887274	-0.488249	1.08386	0.85887	0.399024	0.673556	0.999952
+pH fractionation/SP	P22314	P22314-2; P22314	AAVATFLQSVQVPEFTPK	[R].AAVATFLQSVQVPEFTPK.[S]		0	1	21	-3.63391	-2.36148	1.58887	0.273808	1.27243	0.380485	0.831052	-4.4322	-2.80168			1.63052		NA
+pH fractionation/SP	O75152	O75152	AAVAVVPLVSEDK	[K].AAVAVVPLVSEDK.[S]		3.35083e-05	1	14	1.70206	1.75212	0.315367	1.04449	0.0500595	0.940476	0.983123	-1.35909	-1.21856	3.29816	1.45528	0.140529	0.949409	0.999952
+pH fractionation/SP	Q96F86	Q96F86	AAVAWANQNR	[K].AAVAWANQNR.[A]		0.00314945	1	5		-1.3677		4.94761			NA	-0.0579779	0.997186	2.30768	1.23089	1.05516	0.523188	0.999952
+pH fractionation/SP	P11766	P11766	AAVAWEAGKPLSIEEIEVAPPK	[K].AAVAWEAGKPLSIEEIEVAPPK.[A]		0	1	16	2.88771	1.89847	0.550549	0.63711	-0.989241	0.158932	0.818997	1.35896	1.35576	1.65166	0.0107592	-0.00319283	0.998094	0.999952
+pH fractionation/SP	P11766	P11766	AAVAWEAGKPLSIEEIEVAPPKAHEVR	[K].AAVAWEAGKPLSIEEIEVAPPKAHEVR.[I]		4.19381e-05	1	2	5.64142	1.21783	1.53777	2.92425	-4.42358	0.0812248	0.818997	1.84353	-0.995367	2.0534	4.3658	-2.8389	0.365746	0.999952
+pH fractionation/SP	P13804	P13804; P13804-2	AAVDAGFVPNDMQVGQTGK	[R].AAVDAGFVPNDMQVGQTGK.[I]		0	1	7	-0.299401	-0.302035	1.92834	0.283148	-0.0026336	0.998245	0.999515	-0.502002	-1.43297	2.09763	1.08844	-0.930968	0.633473	0.999952
+pH fractionation/SP	Q13155	Q13155	AAVDGLSK	[K].AAVDGLSK.[M]		0.00102537	1	6	0.798553		0.0201948				NA	-0.31007	-1.56916	1.79427		-1.25909		NA
+pH fractionation/SP	P14921	P14921-2; P14921; P14921-4; P14921-5	AAVDLKPTLTIIK	[K].AAVDLKPTLTIIK.[T]		4.19381e-05	1	3	-4.36414	0.0413014			4.40544		NA	-1.23114	-0.251045	1.43003	0.159104	0.980093	0.437034	0.999952
+pH fractionation/SP	P31153	P31153; P31153-2	AAVDYQK	[R].AAVDYQK.[V]		0.00365795	1	8	-1.84123	-4.44928	0.683925		-2.60805		NA	-3.82352						NA
+pH fractionation/SP	Q05823	Q05823-2; Q05823	AAVEDNHLLIK	[R].AAVEDNHLLIK.[A]		4.19381e-05	1	1	-1.5606	1.36247			2.92307		NA	0.213938	1.62029	3.70494	0.0593304	1.40635	0.645159	0.999952
+pH fractionation/SP	Q5VTR2	Q5VTR2	AAVEDSGTTVETIK	[K].AAVEDSGTTVETIK.[L]		0	1	5	1.15382	-0.118493	0.786977	0.152514	-1.27231	0.120826	0.818997	-1.25398	-2.39542	1.96104	0.814816	-1.14143	0.411261	0.999952
+pH fractionation/SP	P10809	P10809	AAVEEGIVLGGGCALLR	[R].AAVEEGIVLGGGCALLR.[C]	1xCarbamidomethyl [C13]	0	1	46	2.81275	0.272911	0.485482	1.59793	-2.53984	0.057935	0.818997	1.01735	-0.317072	1.56427	1.20275	-1.33443	0.306475	0.999952
+pH fractionation/SP	Q5T1M5	Q5T1M5-2; Q5T1M5; Q5T1M5-3	AAVEFNK	[K].AAVEFNK.[Q]		0.00962088	1	1	-0.276642	-1.48579	0.465268	2.71233	-1.20915	0.471321	0.851614	-1.69306	-0.44962	1.86863	0.120374	1.24344	0.438185	0.999952
+pH fractionation/SP	O94906	O94906-2; O94906	AAVELEEPEDAR	[K].AAVELEEPEDAR.[I]		3.35083e-05	1	14	4.90735	3.99172	1.07208	2.76094	-0.915632	0.620716	0.889668	5.10606	4.91753	1.90997	2.45274	-0.188527	0.9214	0.999952
+pH fractionation/SP	P49247	P49247	AAVENHVR	[R].AAVENHVR.[N]		0.000553704	1	4	-0.853584	-0.936648	0.297459		-0.0830635		NA							NA
+pH fractionation/SP	Q14974	Q14974	AAVENLPTFLVELSR	[R].AAVENLPTFLVELSR.[V]		0	1	24	2.69202	1.9181	0.289042	0.911592	-0.773919	0.233632	0.818997	0.391785	1.311	2.01528	0.748492	0.919216	0.500055	0.999952
+pH fractionation/SP	Q99460	Q99460-2; Q99460	AAVESLGFILFR	[R].AAVESLGFILFR.[T]		3.35083e-05	1	3	-1.46916	0.0487787	1.2825	1.70757	1.51794	0.285711	0.819124	1.28604	-1.3335	1.40965	3.46202	-2.61953	0.291592	0.999952
+pH fractionation/SP	Q9UJX6	Q9UJX6; Q9UJX6-2	AAVEVLR	[R].AAVEVLR.[G]		0.00359362	1	2	1.34871	0.983305	3.5053	3.06184	-0.365406	0.898403	0.971919	2.83399	1.81713	2.18675	2.5002	-1.01686	0.62401	0.999952
+pH fractionation/SP	Q01844-5	Q01844-6; Q01844; Q01844-5; Q01844-3; Q01844-2	AAVEWFDGK	[K].AAVEWFDGK.[D]		4.19381e-05	1	46	0.855685	0.387296	0.58432	1.0332	-0.468389	0.531844	0.865228	-0.303475	-0.43995	1.64554	1.15767	-0.136475	0.912136	0.999952
+pH fractionation/SP	Q01844-5	Q01844-6; Q01844; Q01844-5; Q01844-3; Q01844-2	AAVEWFDGKDFQGSK	[K].AAVEWFDGKDFQGSK.[L]		0	1	5	-0.629103	0.413318	0.652003	0.0904403	1.04242	0.122457	0.818997	-1.21104	-0.801743	1.96518	0.821164	0.4093	0.755959	0.999952
+pH fractionation/SP	Q29RF7	Q29RF7	AAVGQESPGGLEAGNAK	[R].AAVGQESPGGLEAGNAK.[A]		0	1	8	1.70277	0.851967	0.487034	1.50211	-0.850805	0.403537	0.835161	0.101456	-0.804948	1.56495	0.400428	-0.906403	0.500124	0.999952
+pH fractionation/SP	Q8WUM4	Q8WUM4-3; Q8WUM4-2; Q8WUM4	AAVGRPLDKHEGALETLLR	[R].AAVGRPLDKHEGALETLLR.[Y]		0	1	1	-1.87155	-2.63219		0.208951	-0.760634		NA	-2.49391	-2.5029	0.573116	0.0777969	-0.00899221	0.984598	0.999952
+pH fractionation/SP	Q86V81	Q86V81	AAVHYDR	[K].AAVHYDR.[S]		0.00482428	1	10	1.00962	1.36669	0.608394	1.90642	0.357063	0.767276	0.930542	3.00628	3.24435	2.16023	0.464619	0.238066	0.89288	0.999952
+pH fractionation/SP	Q9NR30	Q9NR30; Q9NR30-2	AAVIGDVIR	[R].AAVIGDVIR.[V]		9.74898e-05	1	34	0.0184595	-1.3995	2.88853	3.60376	-1.41796	0.623048	0.88974	-1.69405	-0.436336	2.25853	1.7737	1.25772	0.490349	0.999952
+pH fractionation/SP	Q9BUT1	Q9BUT1-3; Q9BUT1	AAVIGLTK	[K].AAVIGLTK.[S]		0.000420983	1	10	0.895506	0.821421	1.11914	0.710157	-0.0740847	0.927533	0.980746	-0.207267	-0.0764299	1.92426	0.816296	0.130837	0.918886	0.999952
+pH fractionation/SP	Q2TAY7	Q2TAY7-2; Q2TAY7	AAVKDVEEEKFPTQLSR	[K].AAVKDVEEEKFPTQLSR.[H]		3.35083e-05	1	4	0.848164	0.163049	0.159715	3.21303	-0.685115	0.73092	0.918847	1.24498	-0.772877			-2.01786		NA
+pH fractionation/SP	Q6P9B9	Q6P9B9	AAVLDHLR	[R].AAVLDHLR.[G]		0.000518173	1	3	-1.71961	0.0407127	0.66681	1.38783	1.76033	0.118771	0.818997	0.729509	1.78172	1.60188	0.362739	1.05221	0.329378	0.999952
+pH fractionation/SP	P13716-2	P13716-2; P13716	AAVLEAMTAFR	[K].AAVLEAMTAFR.[R]		4.19381e-05	1	2	-3.49787	-2.12577	1.14872	0.46541	1.3721	0.127644	0.818997	-4.30842	-4.62529			-0.316864		NA
+pH fractionation/SP	Q13206	Q13206	AAVLFATDIAAR	[R].AAVLFATDIAAR.[G]		4.19381e-05	1	6	-3.58498	-0.460597	0.481852	3.66344	3.12439	0.354317	0.826791	-0.609821	-1.26081	2.9042	1.96483	-0.650985	0.763885	0.999952
+pH fractionation/SP	Q9UKM9-2; Q9UKM9	Q9UKM9-2; RALY_3207_E0; Q9UKM9	AAVLGENGR	[R].AAVLGENGR.[V]		0.000420983	2	15	-1.62622	-0.315455	0.693663		1.31076		NA	-1.64709	-0.373886	1.61095	0.109775	1.27321	0.367267	0.999952
+pH fractionation/SP	Q13435	Q13435	AAVLLEQER	[R].AAVLLEQER.[Q]		9.74898e-05	1	31	1.41696	1.69425	0.151903	0.404096	0.277287	0.328269	0.822014	2.00381	2.52353	0.760416	0.290038	0.519714	0.330743	0.999952
+pH fractionation/SP	Q13435	Q13435	AAVLLEQERQQEIAK	[R].AAVLLEQERQQEIAK.[M]		0.000236593	1	4	-4.01482	0.123442			4.13826		NA	-2.75862	-1.2912	0.374753	0.228335	1.46742	0.041924	0.999952
+pH fractionation/SP	Q9BZE4	Q9BZE4; Q9BZE4-2; Q9BZE4-3	AAVLYVMDLSEQCGHGLR	[R].AAVLYVMDLSEQCGHGLR.[E]	1xCarbamidomethyl [C13]	0	1	4	-1.64735		0.0621776				NA		-2.26111					NA
+pH fractionation/SP	Q96GX9	Q96GX9; Q96GX9-3	AAVMATLLFPGR	[K].AAVMATLLFPGR.[E]		3.35083e-05	1	5	-1.40243	0.370975	0.205893	0.303438	1.77341	0.00407505	0.563079	-0.176676	-2.01312			-1.83644		NA
+pH fractionation/SP	Q96GX9	Q96GX9; Q96GX9-3	AAVMATLLFPGR	[K].AAVMATLLFPGR.[E]	1xOxidation [M4]	0.000177325	1	1	-1.82955	-0.332522	0.166463	1.14726	1.49703	0.179957	0.818997	-1.07465	-1.77335	0.5555	1.08758	-0.6987	0.395947	0.999952
+pH fractionation/SP	Q6P2Q9	Q6P2Q9	AAVMHDILDMMPEGIK	[R].AAVMHDILDMMPEGIK.[Q]	1xOxidation [M]	0.00121573	1	5	-3.70447	1.29545			4.99993		NA	-0.33429	0.807462	1.40916	1.04385	1.14175	0.322518	0.999952
+pH fractionation/SP	Q6P2Q9	Q6P2Q9	AAVMHDILDMMPEGIK	[R].AAVMHDILDMMPEGIK.[Q]		0	1	14	0.0448657	-1.36984	2.76429	2.89595	-1.41471	0.573584	0.876686	0.416316	-3.74489	1.00941	0.151754	-4.16121	0.0287934	0.999952
+pH fractionation/SP	P35222	P35222	AAVMVHQLSK	[K].AAVMVHQLSK.[K]		0.000177325	1	1	4.38025	3.47877	0.192702	2.07028	-0.901485	0.494441	0.856564	2.94229	1.79994	1.52439	0.809496	-1.14235	0.315561	0.999952
+pH fractionation/SP	Q9UKB1	Q9UKB1-2; Q9UKB1-3; Q9Y297-2; Q9UKB1; Q9Y297	AAVNVVDFDDK	[R].AAVNVVDFDDK.[Y]		4.19381e-05	1	3	-1.90753	-1.92373	1.84822	0.964341	-0.0162054	0.989902	0.997078	-2.81607	-4.12419	3.01935	0.226367	-1.30812	0.602342	0.999952
+pH fractionation/SP	P13637-3; P05023	P13637-3; P13637-2; P05023-2; P50993; P05023; P05023-4; P05023-3; P13637	AAVPDAVGK	[R].AAVPDAVGK.[C]		0.000246334	2	5	0.842296	-0.553211	0.636885	0.789816	-1.39551	0.114071	0.818997	-0.928377	-0.247613	1.45845	0.303829	0.680764	0.579422	0.999952
+pH fractionation/SP	P13929; P09104; P06733	P13929; P13929-3; P09104-2; P13929-2; P09104; P06733	AAVPSGASTGIYEALELR	[R].AAVPSGASTGIYEALELR.[D]		0	3	62	2.44069	-0.730953	0.953986	3.82712	-3.17164	0.236107	0.818997	0.341406	-1.36235	1.5315	4.27913	-1.70375	0.551549	0.999952
+pH fractionation/SP	P06733	P06733	AAVPSGASTGIYEALELRDNDK	[R].AAVPSGASTGIYEALELRDNDK.[T]		0	1	6	1.83975	0.124168	1.95852	2.26211	-1.71558	0.449356	0.846251	0.759784	-1.50366	4.14768	0.57686	-2.26344	0.524504	0.999952
+pH fractionation/SP	P06733	P06733	AAVPSGASTGIYEALELRDNDKTR	[R].AAVPSGASTGIYEALELRDNDKTR.[Y]		0	1	15	-3.2202	-2.84213	0.639196	2.5224	0.378072	0.855745	0.959783	1.49483	2.20574	1.09906	0.51498	0.710904	0.367724	0.999952
+pH fractionation/SP	P00558	P00558-2; P00558	AAVPSIK	[K].AAVPSIK.[F]		0.00327061	1	59	0.438881	-1.05296	0.205793	0.761956	-1.49184	0.0306764	0.791941	-1.85548	-1.86231	0.976109	1.39557	-0.00683595	0.994786	0.999952
+pH fractionation/SP	Q8NEF9	Q8NEF9	AAVQAFK	[K].AAVQAFK.[E]		0.00100015	1	3	4.70333	4.23582	0.698158	2.28117	-0.467514	0.751356	0.925433	3.30922	3.05099	1.49987	0.74884	-0.258232	0.802812	0.999952
+pH fractionation/SP	Q9UMY1	Q9UMY1	AAVQFLNNAWGIQK	[R].AAVQFLNNAWGIQK.[K]		3.35083e-05	1	4	-1.62805	1.52116	1.00902	1.23851	3.14921	0.108182	0.818997	1.9156	-1.40076		0.403479	-3.31636		NA
+pH fractionation/SP	P22033	P22033	AAVQVLDDIEK	[K].AAVQVLDDIEK.[C]		4.19381e-05	1	14	5.0914	3.95972	0.860354	0.853809	-1.13168	0.18116	0.818997	3.65381	3.38408	0.557608	0.188937	-0.269724	0.471897	0.999952
+pH fractionation/SP	B0I1T2	B0I1T2	AAVSALLEQHGLQGDVAFGHSK	[K].AAVSALLEQHGLQGDVAFGHSK.[L]		0	1	7		-0.104859					NA	-1.69986	-1.56589	3.06903	0.80632	0.133964	0.957705	0.999952
+pH fractionation/SP	Q9H9L3	Q9H9L3	AAVSWLTPAPSK	[K].AAVSWLTPAPSK.[K]		4.19381e-05	1	5	-0.739712	-1.26238	0.874403	0.766376	-0.522664	0.59	0.881042	-1.05773		0.806259				NA
+pH fractionation/SP	Q9NP81	Q9NP81-2; Q9NP81	AAVTEAVR	[K].AAVTEAVR.[A]		0.000849071	1	5	-0.075247	0.912998	1.99528	1.07242	0.988245	0.578498	0.87835	-2.58434	-2.4034	0.717612	1.20205	0.180936	0.841257	0.999952
+pH fractionation/SP	P19338	P19338	AAVTPGKK	[K].AAVTPGKK.[A]		0.00295288	1	4	2.45066	0.200367	0.539477	1.81699	-2.25029	0.108899	0.818997	-0.344847	0.0937267	2.08434	0.420934	0.438573	0.798048	0.999952
+pH fractionation/SP	P00390	P00390-5; P00390-2; P00390; P00390-3; P00390-4	AAVVESHK	[R].AAVVESHK.[L]		0.000275366	1	5	0.341914	0.914952	2.08173		0.573038		NA	-2.25277						NA
+pH fractionation/SP	Q15125	Q15125	AAVVPLGTWR	[R].AAVVPLGTWR.[R]		8.08306e-05	1	18	-2.11518	-2.27076	0.990185	2.27311	-0.155575	0.918945	0.977819							NA
+pH fractionation/SP	Q14978-2; Q14978-3	Q14978; Q14978-2; Q14978-3	AAVVVSK	[K].AAVVVSK.[S]		0.00228826	2	13	2.04347	0.148855	1.00872	2.16894	-1.89462	0.242014	0.818997	-0.645096	-2.10454	1.55185	2.57951	-1.45944	0.448325	0.999952
+pH fractionation/SP	P49916	P49916-4; P49916-3; P49916-2; P49916	AAVWEITGAEFSK	[K].AAVWEITGAEFSK.[S]		3.35083e-05	1	10	4.12736	3.35229	0.0895011	1.1304	-0.775074	0.302001	0.819326	3.29909	3.54612	1.20048	1.09039	0.247028	0.804948	0.999952
+pH fractionation/SP	P24752	P24752	AAWEAGK	[K].AAWEAGK.[F]		0.00812107	1	3	-0.439616	0.739888	1.50103	0.751149	1.1795	0.290447	0.819326	1.89023	1.44246	0.827003	0.926734	-0.44777	0.566211	0.999952
+pH fractionation/SP	P11172	P11172; P11172-3; P11172-2; P11172-4	AAWEAYLSR	[K].AAWEAYLSR.[L]		0.000246334	1	10	0.936838	-0.240346	0.593309	0.425347	-1.17718	0.0981216	0.818997	0.141229	0.125485	1.35478	0.547619	-0.0157447	0.98898	0.999952
+pH fractionation/SP	P51659	P51659-2; P51659; P51659-3	AAWEHMK	[R].AAWEHMK.[K]		0.00391717	1	8	4.26485	2.34794	0.623049	1.88344	-1.91691	0.169518	0.818997	4.58818	0.582434	1.7324	5.13332	-4.00574	0.269538	0.999952
+pH fractionation/SP	P11310-2	ACADM_6707_E0; P11310-2; P11310	AAWEVDSGR	[R].AAWEVDSGR.[R]		0.000177325	1	24	3.09952	1.0856	0.272585	1.15489	-2.01392	0.0424056	0.818997	-0.946907	-1.70597	1.68778	0.913204	-0.759063	0.53091	0.999952
+pH fractionation/SP	Q9NUW8	Q9NUW8; Q9NUW8-2	AAWGALEK	[K].AAWGALEK.[N]		0.000542627	1	5	-0.479543	-0.542596	0.619371	0.550605	-0.0630536	0.901519	0.973284	-1.028	-0.962013	0.606287	0.986552	0.0659883	0.926122	0.999952
+pH fractionation/SP	P06132	P06132	AAWGEETDYTPVWCMR	[R].AAWGEETDYTPVWCMR.[Q]	1xCarbamidomethyl [C14]	0	1	1	-3.93681	-2.35594	2.89472		1.58087		NA							NA
+pH fractionation/SP	Q13029	Q13029-2; PRDM2_5557_I2; Q13029; Q13029-3; Q13029-5	AAWTDAGLTSK	[K].AAWTDAGLTSK.[K]		4.19381e-05	1	8		-1.98056		1.19377			NA		-1.94478		0.207155			NA
+pH fractionation/SP	O75955	O75955; O75955-2	AAYDIEVNTR	[K].AAYDIEVNTR.[R]		0.000542627	1	2	-2.42474	-2.24266	1.32306	2.06274	0.182082	0.925903	0.980252	-1.40461	-0.221235	0.806055	1.09501	1.18338	0.288675	0.999952
+pH fractionation/SP	P02545	P02545-6; P02545-2; P02545; P02545-3	AAYEAELGDAR	[K].AAYEAELGDAR.[K]		0.000346548	1	1		0.489384					NA	0.360447	1.27937	1.65956	0.730214	0.918924	0.429593	0.999952
+pH fractionation/SP	Q15833-3	Q15833; Q15833-3; Q15833-2	AAYEVTR	[R].AAYEVTR.[A]		0.00995925	1	1	-3.60283	0.0688355	0.045795		3.67166		NA		-2.80267		1.49355			NA
+pH fractionation/SP	Q15262-4	Q15262; Q15262-4; Q15262-2; Q15262-3	AAYFDMIR	[K].AAYFDMIR.[I]		0.00124955	1	2	-1.26367	-1.23302	0.321299	0.508125	0.0306519	0.933875	0.982129	-2.11873	-0.668274	1.47188	0.69367	1.45046	0.334586	0.999952
+pH fractionation/SP	P05141	P05141	AAYFGIYDTAK	[R].AAYFGIYDTAK.[G]		4.19381e-05	1	27	-2.70257	-2.0531	0.208929	1.28586	0.649475	0.553822	0.871161	1.41668	1.60782	0.668549	0.921498	0.191141	0.820418	0.999952
+pH fractionation/SP	P12236; P12235	P12236; P12235	AAYFGVYDTAK	[R].AAYFGVYDTAK.[G]		4.19381e-05	2	30	1.61445	1.14712	0.116776	2.07979	-0.467332	0.717382	0.914977	-0.605692	0.18529	3.4374	0.967677	0.790982	0.712204	0.999952
+pH fractionation/SP	Q9H0E3-3	Q9H0E3; Q9H0E3-2; Q9H0E3-3	AAYHHFQR	[K].AAYHHFQR.[Y]		0.000413649	1	4	-1.42705	0.235846	0.974706	0.630707	1.66289	0.0681472	0.818997	0.801479	0.268828	1.42636	2.52786	-0.532651	0.766497	0.999952
+pH fractionation/SP	P49821	P49821; P49821-2	AAYIYIR	[R].AAYIYIR.[G]		0.00159148	1	3	1.65075	0.96426	0.443423	1.75184	-0.686488	0.546491	0.869184	-0.557747	0.178702	1.668	0.567912	0.73645	0.509186	0.999952
+pH fractionation/SP	Q14839-2	Q14839-2; Q14839	AAYLNMSEDPSHPSMALNTR	[R].AAYLNMSEDPSHPSMALNTR.[F]		0	1	12	-1.45862	-1.53755	3.64667	1.03963	-0.0789255	0.972969	0.992032	-0.408862	-2.93224	3.55622	1.49676	-2.52338	0.452658	0.999952
+pH fractionation/SP	P04083	P04083	AAYLQETGKPLDETLK	[K].AAYLQETGKPLDETLK.[K]		0	1	6	1.19695	1.36879	0.169996	2.03144	0.171833	0.890985	0.969814	0.0553825	0.737589	1.81936	0.937762	0.682207	0.594676	0.999952
+pH fractionation/SP	P04083	P04083	AAYLQETGKPLDETLKK	[K].AAYLQETGKPLDETLKK.[A]		4.19381e-05	1	4	-1.17597	-0.687026	0.838621	1.89434	0.488943	0.762776	0.928703	0.517469	1.55412	0.655098	0.384561	1.03666	0.144732	0.999952
+pH fractionation/SP	Q14019	Q14019	AAYNLVR	[R].AAYNLVR.[D]		0.00279079	1	4	2.7687	0.974606	0.50007	2.27771	-1.7941	0.25352	0.818997	0.819285	0.356756	2.17225	1.93362	-0.462529	0.796599	0.999952
+pH fractionation/SP	Q8N163	Q8N163; Q8N163-2	AAYNPGQAVPWNAVK	[K].AAYNPGQAVPWNAVK.[V]		0	1	5	-1.6656	-1.93246			-0.26686		NA	-1.72723	-1.50033	0.981835	0.449349	0.2269	0.794355	0.999952
+pH fractionation/SP	P54136	P54136; P54136-2	AAYPDLENPPLLVTPSQQAK	[K].AAYPDLENPPLLVTPSQQAK.[F]		0	1	15	-2.44896	-3.29071	0.288368		-0.841752		NA							NA
+pH fractionation/SP	P52758	P52758	AAYQVAALPK	[R].AAYQVAALPK.[G]		4.19381e-05	1	8	-3.02381	-2.99498	2.3869	0.365507	0.028835	0.988059	0.996397	-2.14248	-4.67947	1.10877		-2.53699		NA
+pH fractionation/SP	Q9Y6Y8	Q9Y6Y8-2; Q9Y6Y8	AAYWEEEPAEVR	[K].AAYWEEEPAEVR.[R]		4.19381e-05	1	4							NA	0.686884	-1.17022	1.49826	3.87675	-1.8571	0.579187	0.999952
+pH fractionation/SP	P51610; P51610-4	P51610; P51610-4; P51610-2	ACAAGTPAVIR	[R].ACAAGTPAVIR.[I]	1xCarbamidomethyl [C2]	0.00030511	2	8	-0.0683352	0.128275	0.137798	3.38133	0.19661	0.924688	0.979812	1.34571	3.16487	2.56063	0.726878	1.81916	0.302056	0.999952
+pH fractionation/SP	O95155-4	O95155-4; O95155-2; O95155-3; O95155	ACADAGLLDESFLR	[K].ACADAGLLDESFLR.[R]	1xCarbamidomethyl [C2]	0	1	2		0.737858					NA	-0.827147	0.130034	2.6244	0.805231	0.957181	0.578466	0.999952
+pH fractionation/SP	P62873	P62873; P62873-2	ACADATLSQITNNIDPVGR	[K].ACADATLSQITNNIDPVGR.[I]	1xCarbamidomethyl [C2]	0	1	24	2.69204	3.20429	0.8681	0.430294	0.512249	0.411621	0.837557	2.9952	1.92384	0.0779023	1.89654	-1.07136	0.503777	0.999952
+pH fractionation/SP	P31040	P31040-2; P31040; P31040-3	ACALSIEESCRPGDK	[R].ACALSIEESCRPGDK.[V]	2xCarbamidomethyl [C2; C10]	0	1	3	-0.554564		0.295261				NA	-0.859069	-2.98747	0.372936		-2.1284		NA
+pH fractionation/SP	P00558	P00558-2; P00558	ACANPAAGSVILLENLR	[K].ACANPAAGSVILLENLR.[F]	1xCarbamidomethyl [C2]	0	1	60	6.45277	5.27007	0.0581531	2.47781	-1.1827	0.454966	0.84745	1.20013	2.76524	4.66548	0.278509	1.56511	0.59301	0.999952
+pH fractionation/SP	Q69YH5	Q69YH5	ACAVETSVDLSEISSK	[R].ACAVETSVDLSEISSK.[L]	1xCarbamidomethyl [C2]	0	1	1							NA	-1.36014	-4.91455	2.09477		-3.55441		NA
+pH fractionation/SP	Q15326	Q15326; Q15326-5; Q15326-4; Q15326-6; Q15326-2; Q15326-3	ACDELELHQR	[K].ACDELELHQR.[F]	1xCarbamidomethyl [C2]	3.35083e-05	1	4	0.663739		1.18656				NA	0.617627	0.022095	0.291991	0.0960701	-0.595532	0.11139	0.999952
+pH fractionation/SP	Q9UJV9	Q9UJV9	ACDESVLMDLK	[K].ACDESVLMDLK.[A]	1xCarbamidomethyl [C2]	4.19381e-05	1	6	0.431687	-1.14831	0.451166	1.59979	-1.58	0.175025	0.818997	-1.95813	-2.28001	3.00873		-0.321879		NA
+pH fractionation/SP	P48449	P48449-2; P48449-3; P48449	ACDFLLSR	[R].ACDFLLSR.[Q]	1xCarbamidomethyl [C2]	0.00773251	1	1	-0.54715	-2.02573	0.0954862	1.76675	-1.47858	0.221335	0.818997	1.08063	1.57783	1.40933	0.918635	0.497192	0.635689	0.999952
+pH fractionation/SP	O00273	O00273-2; O00273	ACDILAIDK	[K].ACDILAIDK.[S]	1xCarbamidomethyl [C2]	4.19381e-05	1	3	-1.79859	0.0639566	0.418694	3.97159	1.86255	0.464504	0.850119	0.655468	3.01875	2.94247	1.04341	2.36328	0.260017	0.999952
+pH fractionation/SP	A0FGR8-6; A0FGR8-2	A0FGR8-6; A0FGR8; A0FGR8-2	ACDLPAWVHFPDTER	[R].ACDLPAWVHFPDTER.[A]	1xCarbamidomethyl [C2]	0	2	5	-0.832444	-1.74347	0.526426	1.4374	-0.911028	0.360872	0.829007	-2.36678	-2.58372	2.17241	0.635771	-0.216938	0.872173	0.999952
+pH fractionation/SP	P42575	P42575	ACDMHVADMLVK	[R].ACDMHVADMLVK.[V]	1xCarbamidomethyl [C2]	0.00286404	1	1	2.4975	2.53486	0.572615	0.61072	0.0373552	0.942108	0.983619	2.55075	2.13547	1.38359	0.949	-0.415278	0.690211	0.999952
+pH fractionation/SP	Q96T76-8	Q96T76; Q96T76-9; Q96T76-8	ACDSVTSNVLPLLLEQFHK	[R].ACDSVTSNVLPLLLEQFHK.[H]	1xCarbamidomethyl [C2]	0	1	3	2.33248	1.87449	0.638859		-0.457998		NA	-0.493486	-0.0878533	3.51959		0.405632		NA
+pH fractionation/SP	P22415	P22415; P22415-2	ACDYIQELR	[K].ACDYIQELR.[Q]	1xCarbamidomethyl [C2]	0.000114852	1	4		-1.24885					NA	-1.53409	-2.09505	2.14514	0.560089	-0.560965	0.754707	0.999952
+pH fractionation/SP	Q9Y490	Q9Y490	ACEFAGFQCQIQFGPHNEQK	[K].ACEFAGFQCQIQFGPHNEQK.[H]	2xCarbamidomethyl [C2; C9]	0.00172132	1	1		0.209194					NA	-1.18987	0.257388	1.95161	0.0589195	1.44726	0.393202	0.999952
+pH fractionation/SP	Q13422	IKZF1_3171_I2; Q13422-3; Q13422-5; Q13422-4; Q13422-7; Q13422; IKZF1_3171_E2; Q13422-8; IKZF1_438_I2	ACEMNGEECAEDLR	[R].ACEMNGEECAEDLR.[M]	2xCarbamidomethyl [C2; C9]	0	1	4	-1.79848		1.28426				NA	-5.09314	-4.60652			0.48662		NA
+pH fractionation/SP	Q6PD62	Q6PD62	ACFCLLEGDK	[R].ACFCLLEGDK.[M]	2xCarbamidomethyl [C2; C4]	0.000275366	1	2	-2.0565	-1.20717	1.77557	0.244671	0.849327	0.457882	0.847833	-1.28912		3.12354				NA
+pH fractionation/SP	Q9H9P8	Q9H9P8-2; Q9H9P8	ACFLGATVK	[K].ACFLGATVK.[Y]	1xCarbamidomethyl [C2]	0.00293532	1	1	-1.02356	-1.069	2.31929	0.780346	-0.0454404	0.97533	0.992345	-3.00472	0.252328	3.183	0.116273	3.25705	0.285043	0.999952
+pH fractionation/SP	P35658	P35658; P35658-4; P35658-5; P35658-2; P35658-3	ACFQVGTSEEMK	[K].ACFQVGTSEEMK.[M]	1xCarbamidomethyl [C2]	4.19381e-05	1	3	2.70423	5.14282	0.0972901	1.97946	2.43858	0.100071	0.818997	6.29617	8.17927	2.02006	2.3717	1.8831	0.354217	0.999952
+pH fractionation/SP	Q9Y5J1	Q9Y5J1	ACFSANGEEVLATSTHSK	[K].ACFSANGEEVLATSTHSK.[V]	1xCarbamidomethyl [C2]	0	1	3		-2.57898		2.06466			NA	-1.0686	-0.396933	1.74676	0.665797	0.671672	0.652627	0.999952
+pH fractionation/SP	P26640	P26640; P26640-2	ACFTMDPK	[R].ACFTMDPK.[L]	1xCarbamidomethyl [C2]	0.00290805	1	4	8.32515	7.17976	0.294378	2.10064	-1.14539	0.402596	0.835161	6.59281	6.05221	1.25251	0.616601	-0.540602	0.539142	0.999952
+pH fractionation/SP	Q96I25	Q96I25	ACFYNLDK	[K].ACFYNLDK.[F]	1xCarbamidomethyl [C2]	0.00412503	1	1		0.325824					NA	0.304481	-0.152957	1.1166	0.856405	-0.457438	0.634756	0.999952
+pH fractionation/SP	P62879	P62879	ACGDSTLTQITAGLDPVGR	[K].ACGDSTLTQITAGLDPVGR.[I]	1xCarbamidomethyl [C2]	0	1	27	2.04506	0.429721	0.371667	3.50471	-1.61534	0.471715	0.851614	2.26107	3.41772	1.63904	0.0818345	1.15665	0.413856	0.999952
+pH fractionation/SP	Q99536	Q99536	ACGLNFADLMAR	[R].ACGLNFADLMAR.[Q]	1xCarbamidomethyl [C2]	3.35083e-05	1	5	2.23881	1.29319	0.127638	1.28385	-0.94562	0.273102	0.818997	1.08218	-0.150676	0.718626	1.56562	-1.23286	0.282889	0.999952
+pH fractionation/SP	P22234	P22234; P22234-2	ACGNFGIPCELR	[K].ACGNFGIPCELR.[V]	2xCarbamidomethyl [C2; C9]	4.19381e-05	1	4	-1.82196	-1.78512	0.108003	0.851397	0.036845	0.944294	0.984214	-5.09822	-2.24362		0.749223	2.8546		NA
+pH fractionation/SP	O14964	O14964-2; O14964	ACGQIFCGK	[R].ACGQIFCGK.[C]	2xCarbamidomethyl [C2; C7]	0.000398881	1	4	-0.546779	-0.372632	0.311003	0.803495	0.174147	0.74221	0.92294	-3.11133	-1.69452	2.54729	0.739641	1.41681	0.528857	0.999952
+pH fractionation/SP	P32121-4	P32121-2; P32121-4; P32121-5; P32121; P32121-3	ACGVDFEIR	[K].ACGVDFEIR.[A]	1xCarbamidomethyl [C2]	0.000177325	1	13	0.215693	1.5603	1.0935	0.313143	1.34461	0.204319	0.818997	0.143079	1.35386	2.01458	0.842252	1.21078	0.391231	0.999952
+pH fractionation/SP	P55769	P55769	ACGVSRPVIACSVTIK	[R].ACGVSRPVIACSVTIK.[E]	2xCarbamidomethyl [C2; C11]	6.09156e-05	1	3	-2.59933	-1.90835	0.675553	1.89101	0.690979	0.579852	0.878616	-1.76491	-1.54025	0.722308	1.17299	0.224661	0.791592	0.999952
+pH fractionation/SP	P29144	P29144	ACIDSNEDGDLSK	[R].ACIDSNEDGDLSK.[S]	1xCarbamidomethyl [C2]	0	1	5	-2.50462	-1.0152	0.426694		1.48942		NA	-3.28273	-3.61774	1.30105	0.986865	-0.335012	0.780691	0.999952
+pH fractionation/SP	A0AVT1	A0AVT1	ACIGDTLCQK	[R].ACIGDTLCQK.[L]	2xCarbamidomethyl [C2; C8]	9.74898e-05	1	5	6.12051	5.13321	0.685048	1.39856	-0.987303	0.33383	0.823688	4.68664	4.0309	1.80761	1.10657	-0.65574	0.620446	0.999952
+pH fractionation/SP	Q14690	Q14690	ACILCVHPR	[R].ACILCVHPR.[T]	2xCarbamidomethyl [C2; C5]	0.000246334	1	5	-0.342406	1.84781	0.683316	1.97512	2.19022	0.143689	0.818997	3.11252	3.22305	1.34346	0.861494	0.110537	0.910296	0.999952
+pH fractionation/SP	Q96GQ7	Q96GQ7	ACIPVGLLGK	[K].ACIPVGLLGK.[D]	1xCarbamidomethyl [C2]	0.000177325	1	9	-1.6592	1.24211		3.06695	2.90131		NA	1.12091	1.55757	0.681307	0.160981	0.436659	0.47077	0.999952
+pH fractionation/SP	Q8IVH4	Q8IVH4	ACLAEAITLVESTHSR	[R].ACLAEAITLVESTHSR.[K]	1xCarbamidomethyl [C2]	0.000152083	1	2	-1.20425	-6.0829	1.05944		-4.87865		NA	0.190922	-6.7881			-6.97902		NA
+pH fractionation/SP	P35998	P35998; P35998-2	ACLIFFDEIDAIGGAR	[K].ACLIFFDEIDAIGGAR.[F]	1xCarbamidomethyl [C2]	0	1	3	-1.6073	-0.664065	2.01875	4.26934	0.943232	0.796897	0.939593	-0.587842	-0.543769	0.273065	1.11662	0.0440735	0.95024	0.999952
+pH fractionation/SP	P12814	P12814; ACTN1_2091_E0	ACLISLGYDIGNDPQGEAEFAR	[K].ACLISLGYDIGNDPQGEAEFAR.[I]	1xCarbamidomethyl [C2]	4.19381e-05	1	2	-2.97555	3.241			6.21655		NA	3.50183	1.75262	0.505719	0.469413	-1.74921	0.0284352	0.999952
+pH fractionation/SP	O43707	O43707-3; O43707-2; O43707	ACLISLGYDVENDR	[K].ACLISLGYDVENDR.[Q]	1xCarbamidomethyl [C2]	0	1	3	-3.23554	-1.47134	1.0626	1.9704	1.7642	0.243998	0.818997	-2.58077	-2.26046	1.87295	0.226655	0.320314	0.832613	0.999952
+pH fractionation/SP	P63272	P63272	ACLLCSLVK	[R].ACLLCSLVK.[T]	2xCarbamidomethyl [C2; C5]	0.000177325	1	8	-1.58327	-0.805466	0.633389	2.3739	0.777808	0.612635	0.887832	3.37615	2.67131	0.738676	1.19733	-0.70484	0.521466	0.999952
+pH fractionation/SP	Q9UK61	Q9UK61; Q9UK61-4; Q9UK61-3	ACLVHNELLEK	[R].ACLVHNELLEK.[E]	1xCarbamidomethyl [C2]	4.19381e-05	1	5		-0.35073					NA	-1.70147	-1.35792	0.632907	1.27756	0.343548	0.765743	0.999952
+pH fractionation/SP	Q9BQ67	Q9BQ67	ACMLTTATAHDGDVNVISWSR	[K].ACMLTTATAHDGDVNVISWSR.[R]	1xCarbamidomethyl [C2]; 1xOxidation [M3]	0	1	1		-1.84974					NA		-2.61198		1.68841			NA
+pH fractionation/SP	Q9BQ67	Q9BQ67	ACMLTTATAHDGDVNVISWSR	[K].ACMLTTATAHDGDVNVISWSR.[R]	1xCarbamidomethyl [C2]	0	1	5	-1.54336	-1.64017	3.16569	1.94851	-0.0968079	0.966184	0.990137	1.0732	-0.560187			-1.63339		NA
+pH fractionation/SP	P13929; P09104	P13929; P13929-3; P09104-2; P13929-2; P09104	ACNCLLLK	[K].ACNCLLLK.[V]	2xCarbamidomethyl [C2; C4]	0.00030511	2	12	2.63617	2.8723	0.237402	0.958328	0.236127	0.699944	0.909815	3.56245	3.24926	0.803134	0.51647	-0.313191	0.600336	0.999952
+pH fractionation/SP	P15927-3	P15927-3; P15927-2; P15927	ACPRPEGLNFQDLK	[K].ACPRPEGLNFQDLK.[N]	1xCarbamidomethyl [C2]	0.000152083	1	6	-4.982	-3.48827	0.0301241	2.07358	1.49373	0.415542	0.838137	-4.84612		1.91247				NA
+pH fractionation/SP	Q9BXI6-2	Q9BXI6-2; Q9BXI6	ACQGQYETIER	[K].ACQGQYETIER.[L]	1xCarbamidomethyl [C2]	4.19381e-05	1	4	2.0242	0.439491	0.480545	1.82874	-1.58471	0.220925	0.818997	-0.486276	-0.625306	2.10186	0.177504	-0.13903	0.934993	0.999952
+pH fractionation/SP	P26358-2	P26358-3; P26358; P26358-2	ACQLSVVVDDK	[R].ACQLSVVVDDK.[K]	1xCarbamidomethyl [C2]	4.19381e-05	1	4	-3.85289						NA	-2.20272	-2.20002	1.35421	1.6368	0.00269556	0.998352	0.999952
+pH fractionation/SP	P26358-2	P26358-3; P26358; P26358-2	ACQLSVVVDDKK	[R].ACQLSVVVDDKK.[F]	1xCarbamidomethyl [C2]	4.19381e-05	1	3	0.469362	0.0895564	0.413991	1.55309	-0.379805	0.703303	0.910651	-0.145249	-1.4395	2.18684	0.426623	-1.29425	0.35828	0.999952
+pH fractionation/SP	P61247	P61247	ACQSIYPLHDVFVR	[K].ACQSIYPLHDVFVR.[K]	1xCarbamidomethyl [C2]	0	1	36	-0.25019	0.725656	0.740692	1.04238	0.975846	0.299001	0.819326	0.833496	0.326112	0.67141	1.51702	-0.507384	0.624333	0.999952
+pH fractionation/SP	P61247	P61247	ACQSIYPLHDVFVRK	[K].ACQSIYPLHDVFVRK.[V]	1xCarbamidomethyl [C2]	4.19381e-05	1	2	-2.89913	-2.30564	0.537076	1.33904	0.593488	0.515511	0.86143	-1.24374	-3.25966	0.457464		-2.01591		NA
+pH fractionation/SP	Q13045	Q13045; Q13045-3; Q13045-2	ACSAIHAVNLR	[K].ACSAIHAVNLR.[N]	1xCarbamidomethyl [C2]	3.35083e-05	1	6	-2.42051	-1.665	1.29997	1.8306	0.755514	0.591282	0.881099	-0.999362	-0.927821	0.652687	0.958411	0.0715413	0.920043	0.999952
+pH fractionation/SP	Q6PI48	Q6PI48	ACSLLGK	[K].ACSLLGK.[L]	1xCarbamidomethyl [C2]	0.00551384	1	2	-1.47213	-2.72468	0.456727	1.84047	-1.25256	0.316406	0.820259	-2.94297		1.19104				NA
+pH fractionation/SP	O60293	O60293; O60293-2	ACTDESLAVEER	[K].ACTDESLAVEER.[I]	1xCarbamidomethyl [C2]	4.19381e-05	1	1		1.11039					NA	0.0116758	-0.20075	0.375551	1.25946	-0.212426	0.840439	0.999952
+pH fractionation/SP	P49368	P49368-2; P49368	ACTILLR	[K].ACTILLR.[G]	1xCarbamidomethyl [C2]	0.00198804	1	23	4.5661	4.35396	0.681216	2.49971	-0.212138	0.894079	0.970722	2.85826	3.34362	2.14942	0.476688	0.485358	0.722002	0.999952
+pH fractionation/SP	Q6KC79	Q6KC79-2; Q6KC79	ACTQLVDNLVEHILK	[K].ACTQLVDNLVEHILK.[Y]	1xCarbamidomethyl [C2]	0.00271112	1	1	-3.23267	-1.29871	0.424404		1.93396		NA	-1.93471	-2.31149	0.209383	0.707194	-0.376786	0.54506	0.999952
+pH fractionation/SP	P49915	P49915; P49915-2	ACTTEEDQEK	[K].ACTTEEDQEK.[L]	1xCarbamidomethyl [C2]	0.000133665	1	3	2.14179	-0.0280851	2.67043	0.470767	-2.16987	0.358548	0.828253	0.217689	0.426481	1.23385	1.48819	0.208791	0.873853	0.999952
+pH fractionation/SP	Q86Y97	Q86Y97	ACVHPSPLR	[R].ACVHPSPLR.[R]	1xCarbamidomethyl [C2]	0.000877399	1	2	0.0157044	-0.17062	1.13156	1.2962	-0.186324	0.860351	0.961334	1.96816	0.405628		0.271716	-1.56253		NA
+pH fractionation/SP	P00491	P00491	ACVMMQGR	[R].ACVMMQGR.[F]	1xCarbamidomethyl [C2]; 1xOxidation [M]	0.0010644	1	3	-3.51948	-2.80788	1.3419	0.222758	0.711603	0.530745	0.864769	-1.20437						NA
+pH fractionation/SP	P00491	P00491	ACVMMQGR	[R].ACVMMQGR.[F]	1xCarbamidomethyl [C2]	0.000874531	1	11	1.17557	1.89803	0.298893	1.41306	0.722458	0.435159	0.84138	2.28081	2.59067	2.04096	0.961221	0.309856	0.823652	0.999952
+pH fractionation/SP	Q9Y2K7	Q9Y2K7-4; Q9Y2K7-5; Q9Y2K7-3; Q9Y2K7-2; Q9Y2K7	ACVQGECGVCHYCR	[K].ACVQGECGVCHYCR.[D]	4xCarbamidomethyl [C2; C7; C10; C13]	3.35083e-05	1	1		1.45611					NA	0.788463	1.42015	3.35292	0.860011	0.631691	0.767744	0.999952
+pH fractionation/SP	P05023	P50993; P05023; P05023-4; P05023-3	ACVVHGSDLK	[K].ACVVHGSDLK.[D]	1xCarbamidomethyl [C2]	4.19381e-05	1	7	0.113516	-1.03227	0.442833	1.00113	-1.14578	0.144065	0.818997	-1.06187	-1.95432	0.755251	0.882568	-0.89245	0.308926	0.999952
+pH fractionation/SP	P23396	P23396-2; P23396	ACYGVLR	[R].ACYGVLR.[F]	1xCarbamidomethyl [C2]	0.00286404	1	13	0.073199	0.118261	0.334514	1.42755	0.0450619	0.958238	0.987861	-1.4818	-1.90034	2.34228	0.452355	-0.418538	0.765116	0.999952
+pH fractionation/SP	P61163; P42025	P61163; P42025	ACYLSINPQK	[R].ACYLSINPQK.[D]	1xCarbamidomethyl [C2]	0.000177325	2	1	0.117103	1.24685	0.466634	1.34854	1.12975	0.242189	0.818997	1.38178	1.40901	0.810359	0.854191	0.0272251	0.969973	0.999952
+pH fractionation/SP	P61163	P61163	ACYLSINPQKDETLETEK	[R].ACYLSINPQKDETLETEK.[A]	1xCarbamidomethyl [C2]	4.19381e-05	1	3	2.81151	3.16076	0.0507556	0.802754	0.349249	0.493853	0.856448	3.27575	1.97022	0.896511	1.77015	-1.30553	0.318057	0.999952
+pH fractionation/SP	P22681	Q13191-3; Q13191; Q13191-2; P22681	ADAAEFWR	[K].ADAAEFWR.[K]		0.000318209	1	12	-3.43139	-2.99887	1.23968	0.575594	0.432511	0.698302	0.909485	-4.43243	-3.64262			0.789812		NA
+pH fractionation/SP	Q96ES7	Q96ES7	ADAEAECNILR	[K].ADAEAECNILR.[K]	1xCarbamidomethyl [C7]	4.19381e-05	1	1	-1.33087	-1.55111	0.427715	1.24351	-0.220238	0.782248	0.93499	-3.04051	-3.28522	0.763917	1.11202	-0.24471	0.769099	0.999952
+pH fractionation/SP	Q13409	Q13409-7; Q13409-2; Q13409; Q13409-3; Q13409-6; Q13409-5	ADAEEEAATR	[R].ADAEEEAATR.[I]		4.19381e-05	1	5	-2.08866		0.0749271				NA	-3.73773	-1.14393	0.597349	0.0962417	2.5938	0.026145	0.999952
+pH fractionation/SP	Q68DH5	Q68DH5	ADAEENLEDAMEEVR	[K].ADAEENLEDAMEEVR.[K]		0	1	4	-1.41758	-1.35073	2.34877	3.44367	0.0668528	0.980515	0.993791	0.481114	0.678949	0.107542	0.325409	0.197835	0.485072	0.999952
+pH fractionation/SP	Q9Y490	Q9Y490	ADAEGESDLENSR	[K].ADAEGESDLENSR.[K]		0	1	9	1.97447	0.988	0.166169		-0.986469		NA		-1.23238					NA
+pH fractionation/SP	P52298	P52298; A6PVI3; P52298-2	ADAENAMR	[R].ADAENAMR.[YF]		0.000398881	1	7	2.0218	1.29606	0.582375	1.58991	-0.725737	0.497876	0.857792	-0.637106	0.0255701	3.36555	0.864866	0.662676	0.757743	0.999952
+pH fractionation/SP	P08758	P08758	ADAETLR	[R].ADAETLR.[K]		0.00562911	1	2	-3.04155	0.0316301	0.38975		3.07318		NA	0.426594	1.13542	0.598166	0.712522	0.708831	0.334315	0.999952
+pH fractionation/SP	Q8WYJ6	Q8WYJ6	ADALMPQETQALK	[K].ADALMPQETQALK.[Q]		3.35083e-05	1	23	-1.35855	-0.0502734	2.35465	3.21669	1.30827	0.600136	0.884107	0.431958	1.19934	2.49698	1.32708	0.767381	0.725269	0.999952
+pH fractionation/SP	P63027	Q15836; P63027	ADALQAGASQFETSAAK	[R].ADALQAGASQFETSAAK.[L]		0	1	4	1.9913	2.10546	1.1624	1.78293	0.114159	0.930449	0.981144	2.11599	2.28596	0.581462	0.333738	0.169976	0.683247	0.999952
+pH fractionation/SP	Q6NYC1-3	Q6NYC1; Q6NYC1-2; Q6NYC1-3	ADALQLSVEEFVER	[R].ADALQLSVEEFVER.[Y]		0	1	1	1.02665	1.06549	0.857612	0.311462	0.0388449	0.944758	0.984221	-2.12459	0.340966	1.01859	0.787916	2.46556	0.0651539	0.999952
+pH fractionation/SP	O75792	O75792	ADALYPVVSAASICAK	[K].ADALYPVVSAASICAK.[V]	1xCarbamidomethyl [C14]	0	1	4	2.95899	0.936548	0.161462	2.19213	-2.02244	0.186237	0.818997	-0.189204	-2.00047	2.19918	1.55993	-1.81127	0.442369	0.999952
+pH fractionation/SP	Q15223	Q15223-3; Q15223; Q15223-2	ADANPPATEYHWTTLNGSLPK	[K].ADANPPATEYHWTTLNGSLPK.[G]		0.00382884	1	2	0.776374	2.72757	0.236617	3.14755	1.9512	0.344613	0.824979	3.80523	5.5627	2.7519	0.449499	1.75747	0.336319	0.999952
+pH fractionation/SP	Q96T58	Q96T58	ADAPEGLAPEDR	[K].ADAPEGLAPEDR.[D]		0.000802534	1	3	-4.87327	-1.16634			3.70694		NA	-3.7874	-1.18032			2.60708		NA
+pH fractionation/SP	Q9BQ52	Q9BQ52-4; Q9BQ52-2; Q9BQ52	ADAPVALVVHMAPASVLVDSR	[K].ADAPVALVVHMAPASVLVDSR.[Y]		0.000387362	1	1		1.02735					NA	0.435846	-1.43395	0.939251	0.693956	-1.8698	0.0987491	0.999952
+pH fractionation/SP	O95433	O95433-2; O95433	ADATNVNNWHWTER	[R].ADATNVNNWHWTER.[D]		0	1	16	-1.30397	-1.01775	0.277436	0.499355	0.286219	0.434453	0.841301	-1.20454	-3.19674	0.256435	0.387434	-1.9922	0.00569545	0.999952
+pH fractionation/SP	P49411	P49411	ADAVQDSEMVELVELEIR	[K].ADAVQDSEMVELVELEIR.[E]		0	1	10	-0.944208	-0.705461	0.837685		0.238748		NA	-0.906456						NA
+pH fractionation/SP	Q9NX00	Q9NX00	ADAWLLR	[R].ADAWLLR.[K]		0.00149115	1	7	-1.04919	-3.01079	0.26842	1.77793	-1.9616	0.237445	0.818997	-4.86321	-3.19496	1.10829	0.832454	1.66825	0.145183	0.999952
+pH fractionation/SP	O43747-2	O43747-2; O43747	ADCASGIFLAAEK	[K].ADCASGIFLAAEK.[Y]	1xCarbamidomethyl [C3]	4.19381e-05	1	4	-0.856324	-2.65422	2.91723	0.449893	-1.7979	0.336169	0.823994	-1.71468	-2.64071	1.44654	1.27694	-0.926031	0.518977	0.999952
+pH fractionation/SP	P46063	P46063	ADCILYYGFGDIFR	[K].ADCILYYGFGDIFR.[I]	1xCarbamidomethyl [C3]	0.000236593	1	1	0.356464	-0.0830051	0.188638	2.73393	-0.439469	0.794962	0.939142	0.0478216	-0.912457	2.56299	0.525064	-0.960278	0.543729	0.999952
+pH fractionation/SP	Q13123	Q13123	ADCPTMEAQTTLTTNDIVISK	[K].ADCPTMEAQTTLTTNDIVISK.[L]	1xCarbamidomethyl [C3]	0.000332976	1	2	-0.63574	-3.00236		1.70889	-2.36662		NA	-1.09494	-0.440094	2.30183	0.642844	0.654842	0.735738	0.999952
+pH fractionation/SP	P22307	SCP2_6123_I1; P22307-2; P22307-4; P22307-6; P22307; P22307-8; P22307-7	ADCTITMADSDFLALMTGK	[K].ADCTITMADSDFLALMTGK.[M]	1xCarbamidomethyl [C3]	0	1	34	2.39228	1.86102	0.183136	1.4746	-0.531258	0.569278	0.876003	1.58782	1.57429	0.756687	0.781781	-0.0135296	0.983848	0.999952
+pH fractionation/SP	P22307	SCP2_6123_I1; P22307-2; P22307-4; P22307-6; P22307; P22307-8; P22307-7	ADCTITMADSDFLALMTGK	[K].ADCTITMADSDFLALMTGK.[M]	1xCarbamidomethyl [C3]; 1xOxidation [M7]	3.35083e-05	1	4	-0.664099	-0.586572	0.607538	0.953892	0.0775269	0.91121	0.975619	-1.3841	-2.838	1.78472	0.613981	-1.4539	0.253014	0.999952
+pH fractionation/SP	Q7KZF4	Q7KZF4	ADDADEFGYSR	[R].ADDADEFGYSR.[-]		3.35083e-05	1	16	-1.33289	-2.40519	0.360234	0.164041	-1.0723	0.0319739	0.792995	-3.17913	-2.75821	1.44632		0.420925		NA
+pH fractionation/SP	Q3YEC7	Q3YEC7; Q3YEC7-2	ADDFPVR	[R].ADDFPVR.[D]		0.00436762	1	2	1.99501	0.425594			-1.56941		NA	0.246719		1.45854				NA
+pH fractionation/SP	P04075-2	P04075; P04075-2	ADDGRPFPQVIK	[K].ADDGRPFPQVIK.[S]		0	1	129	-3.19842	-2.09849	0.0870122	2.61932	1.09993	0.507525	0.85989	1.77971	1.23312	0.969295	0.709866	-0.54659	0.511283	0.999952
+pH fractionation/SP	Q9H9E3	Q9H9E3-3; Q9H9E3; Q9H9E3-2	ADDILDLK	[R].ADDILDLK.[F]		0.000192563	1	1	-0.802073	-0.728317	0.498242		0.0737558		NA	-1.7127						NA
+pH fractionation/SP	P02768	P02768; P02768-3; P02768-2	ADDKETCFAEEGKK	[K].ADDKETCFAEEGKK.[L]	1xCarbamidomethyl [C7]	0	1	5	2.55888	2.02623	0.577354	1.43139	-0.532654	0.582207	0.879369	1.50448	0.757538	1.65015	1.35256	-0.74694	0.577008	0.999952
+pH fractionation/SP	P52564	P52564	ADDLEPIMELGR	[K].ADDLEPIMELGR.[G]		0.00063282	1	1	3.34589	1.36022	1.09018	3.41001	-1.98567	0.388228	0.831888	0.359647	0.343206	2.52242	0.263649	-0.0164407	0.993589	0.999952
+pH fractionation/SP	P00441	P00441	ADDLGKGGNEESTK	[K].ADDLGKGGNEESTK.[T]		0	1	7	1.83193	0.51811	1.74458	2.76898	-1.31382	0.549623	0.870248	-0.670947	-3.35865	1.60792		-2.6877		NA
+pH fractionation/SP	P00441	P00441	ADDLGKGGNEESTKTGNAGSR	[K].ADDLGKGGNEESTKTGNAGSR.[L]		0	1	3	-0.394038	-0.661362	0.492276		-0.267324		NA	-0.872917	-2.34735		0.0277908	-1.47443		NA
+pH fractionation/SP	O43290	O43290	ADDLLPLGDQTQDGDFGSR	[R].ADDLLPLGDQTQDGDFGSR.[L]		0	1	10	-1.20842	-0.592707	1.79426	0.608248	0.615711	0.603557	0.885182	-0.756009	-1.38757	4.52555	1.0797	-0.631566	0.865488	0.999952
+pH fractionation/SP	Q13111	Q13111; Q13111-3; Q13111-2	ADDMSDDQGTSVQSK	[K].ADDMSDDQGTSVQSK.[S]		0	1	1		1.06506					NA	-0.399384	-1.26473	0.695458	0.760435	-0.865343	0.289931	0.999952
+pH fractionation/SP	Q96C86	Q96C86	ADDPLLK	[R].ADDPLLK.[L]		0.0038493	1	4	-4.15733	-1.08767	0.930169	1.71898	3.06966	0.0743674	0.818997	-0.965556	0.54874	1.4262	0.0853668	1.5143	0.24984	0.999952
+pH fractionation/SP	Q12888-2	Q12888; Q12888-3; Q12888-2	ADDPLRLDQELQQPQTQEK	[R].ADDPLRLDQELQQPQTQEK.[T]		3.35083e-05	1	1							NA	-0.838	-2.01534	0.195432	1.98578	-1.17734	0.491828	0.999952
+pH fractionation/SP	Q00610	Q00610; Q00610-2	ADDPSSYMEVVQAANTSGNWEELVK	[K].ADDPSSYMEVVQAANTSGNWEELVK.[Y]		0	1	8	2.10892	0.683553	0.304294	1.96678	-1.42537	0.28258	0.819124	-4.60565	-0.30994	2.36997	0.353055	4.29571	0.0360398	0.999952
+pH fractionation/SP	Q8NE71	Q8NE71	ADDPYAHLSK	[K].ADDPYAHLSK.[K]		4.19381e-05	1	12	0.846367	-0.232815	0.760399	1.47786	-1.07918	0.323654	0.82039	-1.52025	-0.878367	0.690711	1.89733	0.64188	0.611202	0.999952
+pH fractionation/SP	P22681	P22681	ADDTLFMMK	[R].ADDTLFMMK.[E]		0.000246334	1	3	-2.49266	-0.971343	0.352536	1.70425	1.52132	0.20457	0.818997	-1.0036	-0.890051	1.10568	1.58896	0.113551	0.923964	0.999952
+pH fractionation/SP	Q9Y2W2	Q9Y2W2	ADDTSAATIEK	[K].ADDTSAATIEK.[K]		4.19381e-05	1	6	1.87453	0.170251	0.749431	0.508107	-1.70428	0.0310754	0.791941	-0.149231	-0.122664	1.735	0.926137	0.0265668	0.985872	0.999952
+pH fractionation/SP	P61421	P61421	ADDYEQVK	[R].ADDYEQVK.[N]		0.00046274	1	2	-0.339764	-1.04562	0.312549		-0.705854		NA	-0.880934	-2.66215			-1.78122		NA
+pH fractionation/SP	P49327	P49327	ADEASELACPTPK	[K].ADEASELACPTPK.[E]	1xCarbamidomethyl [C9]	0	1	12	-1.68991	-1.69326	1.26058		-0.00334863		NA	-2.51052	-3.45236	1.42181	2.29448	-0.941839	0.578215	0.999952
+pH fractionation/SP	P11498	P11498; P11498-2	ADEAYLIGR	[K].ADEAYLIGR.[G]		0.000114852	1	5	-2.17419	-1.4675	0.105161		0.706688		NA	-2.30094	-1.37012	0.261319	1.68328	0.930822	0.520483	0.999952
+pH fractionation/SP	Q9ULE6	Q9ULE6	ADEDFVSYTPR	[R].ADEDFVSYTPR.[D]		4.19381e-05	1	3	-1.61324	-2.51128	2.33616	0.177593	-0.898042	0.520784	0.862158	-0.0207716	-2.98301		1.60935	-2.96223		NA
+pH fractionation/SP	P48739-3	P48739; P48739-2; P48739-3	ADEDPALFQSVK	[K].ADEDPALFQSVK.[T]		3.35083e-05	1	14	2.48068	1.42947	0.780108	0.595196	-1.0512	0.209822	0.818997	0.854357	1.92173	1.43081	0.204519	1.06737	0.392749	0.999952
+pH fractionation/SP	P61970	P61970	ADEDPIMGFHQMFLLK	[K].ADEDPIMGFHQMFLLK.[N]		0	1	6	-0.348634	0.900222	0.125809	0.0182043	1.24886	0.00514051	0.592278	-3.32035	-2.17114			1.14921		NA
+pH fractionation/SP	Q9H4E7	Q9H4E7	ADEDVEAAQR	[R].ADEDVEAAQR.[K]		4.19381e-05	1	3	-0.747897	-0.770891	1.35065	2.12135	-0.0229941	0.988123	0.996401	-1.07082	-1.74561	1.00065	0.816025	-0.674787	0.416562	0.999952
+pH fractionation/SP	Q9NPD8	Q9NPD8	ADEEEMLDNLPEAGDSR	[K].ADEEEMLDNLPEAGDSR.[V]		0	1	1	0.415189	-3.46864	0.615712		-3.88383		NA	0.564035	-0.599357	2.00612	3.90316	-1.16339	0.669961	0.999952
+pH fractionation/SP	Q06830	Q06830	ADEGISFR	[K].ADEGISFR.[G]		0.000318209	1	49	-0.950896	-1.65634	1.92805	2.73921	-0.705441	0.733754	0.92012	-0.819473	-2.02988	1.57311	1.49256	-1.21041	0.454327	0.999952
+pH fractionation/SP	P13861	P13861-2; P13861	ADEHVIDQGDDGDNFYVIER	[K].ADEHVIDQGDDGDNFYVIER.[G]		0	1	10	-0.00542083	0.0993389	0.902549	0.708931	0.10476	0.900335	0.972977	-0.511804	0.00921953	1.20791	0.326859	0.521023	0.609529	0.999952
+pH fractionation/SP	Q8N201	Q8N201	ADEQTTCEVLDYFLR	[K].ADEQTTCEVLDYFLR.[R]	1xCarbamidomethyl [C7]	0.00321697	1	1		0.675843					NA	-0.578387	-1.66904	1.52805	4.06392	-1.09066	0.685936	0.999952
+pH fractionation/SP	P53396	P53396-3; P53396; ACLY_1296_I0; P53396-2; ACLY_1296_E0	ADEVAPAK	[R].ADEVAPAK.[K]		0.00145874	1	12	-1.94449	1.39995	0.409434		3.34444		NA	-1.14415	-1.56969	1.65338	3.60116	-0.425531	0.861496	0.999952
+pH fractionation/SP	P53396	P53396-3; P53396; ACLY_1296_I0; P53396-2; ACLY_1296_E0	ADEVAPAKK	[R].ADEVAPAKK.[A]		0.000877399	1	6	-1.11247	-1.57584	0.21194		-0.463364		NA		-8.06781					NA
+pH fractionation/SP	O75643	O75643-2; O75643	ADEVLEILK	[K].ADEVLEILK.[T]		4.19381e-05	1	12	1.81577	1.91145	0.711668	0.859243	0.0956757	0.889111	0.969131	0.277215	-1.36709	2.12142	3.45419	-1.6443	0.521049	0.999952
+pH fractionation/SP	Q8IY37	Q8IY37	ADEVVAPGQEK	[K].ADEVVAPGQEK.[I]		0.00271112	1	1	-2.64952	3.51239	0.518755		6.16191		NA	1.247	3.99584	3.74909	0.468533	2.74885	0.276123	0.999952
+pH fractionation/SP	P14868	P14868	ADEVVWVR	[K].ADEVVWVR.[A]		0.000177325	1	24	0.123325	-0.401589	1.35022	1.16517	-0.524914	0.686317	0.906232	-1.21831	-2.07718	3.75951	0.294523	-0.858867	0.777933	0.999952
+pH fractionation/SP	P35580-3; P35579	P35580-2; P35580; P35580-5; P35580-3; P35579; P35580-4; P35579-2	ADEWLMK	[K].ADEWLMK.[N]		0.00433177	2	16	-1.08601	-1.39876	0.180534	2.47914	-0.312746	0.838155	0.953507	-0.376595	-2.59733		0.254525	-2.22073		NA
+pH fractionation/SP	P35580-3; P35579	P35580-2; P35580; P35580-5; P35580-3; P35579; P35580-4; P35579-2	ADEWLMK	[K].ADEWLMK.[N]	1xOxidation [M6]	0.00295288	2	7	4.07439	4.47424	0.362881	1.10651	0.399852	0.584031	0.879862	4.70082	4.84576	0.666818	0.100033	0.144938	0.728549	0.999952
+pH fractionation/SP	P11498	P11498; P11498-2	ADFAQACQDAGVR	[R].ADFAQACQDAGVR.[F]	1xCarbamidomethyl [C7]	9.74898e-05	1	1	-0.604874	-0.103527	1.06682	0.836689	0.501348	0.619781	0.889261	-2.32953	-1.25064	1.59699	0.699519	1.07889	0.450288	0.999952
+pH fractionation/SP	P35580-3; P35579	P35580-2; P35580; P35580-5; P35580-3; P35579; P35580-4; P35579-2	ADFCIIHYAGK	[K].ADFCIIHYAGK.[V]	1xCarbamidomethyl [C4]	0	2	43	4.93443	3.61549	0.529735	1.93932	-1.31894	0.319274	0.820259	2.87657	2.57017	1.05662	0.859328	-0.306397	0.716646	0.999952
+pH fractionation/SP	P00390	P00390-5; P00390-2; P00390; P00390-3; P00390-4	ADFDNTVAIHPTSSEELVTLR	[K].ADFDNTVAIHPTSSEELVTLR.[-]		0	1	4	0.0251414	1.12026	2.88541	1.03708	1.09512	0.569649	0.876003	1.44923	3.18881	2.8048	0.610199	1.73959	0.471107	0.999952
+pH fractionation/SP	O95573	O95573	ADFFEDENGQR	[K].ADFFEDENGQR.[W]		4.19381e-05	1	6	-3.49851	-1.14245	0.31478		2.35606		NA	-0.165151	0.0530965	0.671236	0.743661	0.218247	0.725088	0.999952
+pH fractionation/SP	P61803	P61803	ADFQGISPER	[K].ADFQGISPER.[A]		4.19381e-05	1	15	-0.442017	0.145876	0.634933	1.89561	0.587893	0.637318	0.893958	1.18822	0.962908	2.27685	1.24291	-0.225316	0.887694	0.999952
+pH fractionation/SP	Q5HYJ3	Q5HYJ3	ADFQYQESNLR	[K].ADFQYQESNLR.[T]		4.19381e-05	1	3		0.0536774					NA	-2.41521	-1.82485	0.0600356		0.590352		NA
+pH fractionation/SP	P50452	P50452-3; P50452	ADFSGMSTEK	[K].ADFSGMSTEK.[N]		4.19381e-05	1	1	-0.635749	-1.67287	1.03296	2.7269	-1.03712	0.571202	0.876043	-2.68602	-3.07792	2.19791	3.08322	-0.391899	0.875944	0.999952
+pH fractionation/SP	Q7Z7A1	Q7Z7A1-3; Q7Z7A1; Q7Z7A1-5; Q7Z7A1-4; Q7Z7A1-2	ADFSLLR	[R].ADFSLLR.[N]		0.00223086	1	1	-1.10933	-0.501453	0.336238	1.81758	0.607874	0.687597	0.90666	0.476951	1.81255	2.11014	0.78664	1.3356	0.362368	0.999952
+pH fractionation/SP	Q9H2M9	Q9H2M9	ADFSPFGNSQGPSR	[K].ADFSPFGNSQGPSR.[V]		0.00362707	1	1	-1.01859	0.695965	0.500544	0.270255	1.71455	0.0232355	0.753807	0.591107	-0.502367		0.770974	-1.09347		NA
+pH fractionation/SP	P49916	P49916-4; P49916-3; P49916-2; P49916	ADFTVVAGDEGSSTTGGSSEENKGPSGSAVSR	[K].ADFTVVAGDEGSSTTGGSSEENKGPSGSAVSR.[K]		0	1	1		1.27819					NA	1.12939	0.237073	0.459528	0.802066	-0.892312	0.260518	0.999952
+pH fractionation/SP	Q14318-2	Q14318; Q14318-2	ADFVLAANSYDLAIK	[R].ADFVLAANSYDLAIK.[A]		0	1	3	1.76024	4.12993	0.636253		2.36969		NA	0.368622	-1.58306		0.517849	-1.95169		NA
+pH fractionation/SP	Q96F63	Q96F63	ADFYCAEVAR	[R].ADFYCAEVAR.[Q]	1xCarbamidomethyl [C5]	4.19381e-05	1	3	-1.46175	-1.79221	0.366296	1.32713	-0.330455	0.764551	0.929493	0.264051	-0.791424	0.313596	1.32672	-1.05547	0.369762	0.999952
+pH fractionation/SP	P52788	P52788; P52788-2	ADGETILK	[K].ADGETILK.[G]		0.000916456	1	4	2.08316	-0.414276	0.694013	2.91561	-2.49744	0.221129	0.818997	-0.168914	-1.62359	1.56827	0.332506	-1.45467	0.328015	0.999952
+pH fractionation/SP	P15529-2	CD46_1071_E1; P15529-6; CD46_1071_I2; P15529-3; P15529-7; P15529-16; P15529-4; P15529-2; P15529-5	ADGGAEYATYQTK	[K].ADGGAEYATYQTK.[S]		4.19381e-05	1	4	3.76301	3.22839	0.277622		-0.534621		NA	2.21626	2.93466	2.12212	0.788309	0.718397	0.690174	0.999952
+pH fractionation/SP	Q8NDF8-5	Q8NDF8-3; Q8NDF8-5; Q8NDF8-4; Q8NDF8; Q8NDF8-2	ADGGGVVYSGTPWK	[R].ADGGGVVYSGTPWK.[R]		3.35083e-05	1	2		1.26759					NA	-1.78	-0.0790849	1.89753	2.23702	1.70091	0.423748	0.999952
+pH fractionation/SP	P09622	P09622-2; P09622	ADGGTQVIDTK	[K].ADGGTQVIDTK.[N]		4.19381e-05	1	10	4.23816	0.426405	0.164927	2.89813	-3.81176	0.0853124	0.818997	-1.49345	-1.28655	6.30987	1.69828	0.206905	0.958893	0.999952
+pH fractionation/SP	P13612	P13612	ADGISSTFSQR	[R].ADGISSTFSQR.[I]		6.09156e-05	1	6		-1.15177					NA	-0.309742	-1.69328		0.94305	-1.38354		NA
+pH fractionation/SP	Q96A35	Q96A35	ADGIVPETWIDGPK	[R].ADGIVPETWIDGPK.[D]		0.000169063	1	3	0.35941	-0.430943	1.87331	0.396588	-0.790353	0.614693	0.888244	-3.01559	-2.51359	0.102763		0.501999		NA
+pH fractionation/SP	P43403	P43403; P43403-3	ADGLIYCLK	[K].ADGLIYCLK.[E]	1xCarbamidomethyl [C7]	6.09156e-05	1	4	-1.81314	-0.769657	0.967142	0.24794	1.04348	0.249554	0.818997		-3.58593					NA
+pH fractionation/SP	Q8N766	Q8N766-4; Q8N766-2; Q8N766-3; Q8N766	ADGLLGMFLK	[K].ADGLLGMFLK.[R]		0.000177325	1	5	-2.53008	-0.752919	2.21372	2.48598	1.77716	0.407453	0.835568	-0.335174	-0.812062	1.18404	2.45816	-0.476887	0.777184	0.999952
+pH fractionation/SP	Q13445	Q13445	ADGVHTVEPTEAGDYK	[K].ADGVHTVEPTEAGDYK.[L]		0.0012854	1	1	-0.341711	-1.12815	0.742649	0.348591	-0.786439	0.307989	0.819326							NA
+pH fractionation/SP	O94888	O94888	ADGVVEGIDVNGPK	[K].ADGVVEGIDVNGPK.[A]		4.19381e-05	1	3	-0.414229	-1.61797	0.655312	0.11299	-1.20374	0.0919789	0.818997	-2.04259	-1.97651	0.996664	0.0217308	0.0660807	0.934732	0.999952
+pH fractionation/SP	P61247	P61247	ADGYEPPVQESV	[R].ADGYEPPVQESV.[-]		4.19381e-05	1	21	0.331568	-0.269054	0.801258	0.596024	-0.600622	0.356354	0.827424	-0.657884	-0.653908	0.712845	0.426483	0.00397514	0.993784	0.999952
+pH fractionation/SP	O43390; O43390-2; O60506	O43390-4; O43390-3; O43390; O43390-2; O60506; O60506-2	ADGYNQPDSK	[K].ADGYNQPDSK.[R]		4.19381e-05	3	6	-0.316988	0.311095	1.07935	1.73673	0.628082	0.641849	0.895195	-0.721393	0.842867	1.60754	0.542309	1.56426	0.293676	0.999952
+pH fractionation/SP	Q9NYB0	Q9NYB0	ADGYPIWSR	[R].ADGYPIWSR.[Q]		0.000177325	1	6	2.3139	1.78072	0.299946	1.12474	-0.533173	0.471984	0.851765	0.203075	0.423833	3.79621	0.272038	0.220758	0.91952	0.999952
+pH fractionation/SP	P62241	P62241	ADGYVLEGK	[R].ADGYVLEGK.[E]		9.74898e-05	1	28	0.817624	-0.0857571	1.14877	1.24866	-0.903381	0.408616	0.835718	0.0660242	-0.875019	1.48212	1.01632	-0.941043	0.450749	0.999952
+pH fractionation/SP	P62241	P62241	ADGYVLEGKELEFYLR	[R].ADGYVLEGKELEFYLR.[K]		3.35083e-05	1	1	-4.87226	-2.00752	1.73025	2.08506	2.86474	0.210092	0.818997	-1.20134	-0.0499721	1.69127	0.53662	1.15137	0.43848	0.999952
+pH fractionation/SP	P62241	P62241	ADGYVLEGKELEFYLRK	[R].ADGYVLEGKELEFYLRK.[I]		0	1	1	-3.12696	-1.25283		0.865525	1.87413		NA	-2.66905	-1.95677	1.58602	0.938398	0.712283	0.617081	0.999952
+pH fractionation/SP	P62333	P62333	ADHDFVVQEDFMK	[R].ADHDFVVQEDFMK.[A]		0	1	10	1.96452	3.03187	0.409122	2.50474	1.06735	0.506704	0.859685	4.68344	6.22939	3.01351	0.486033	1.54595	0.429895	0.999952
+pH fractionation/SP	P08238	P08238	ADHGEPIGR	[R].ADHGEPIGR.[G]		4.19381e-05	1	35	1.06131	-0.752855	0.741966	1.10205	-1.81417	0.10872	0.818997		-5.31571					NA
+pH fractionation/SP	P08865	P08865	ADHQPLTEASYVNLPTIALCNTDSPLR	[R].ADHQPLTEASYVNLPTIALCNTDSPLR.[Y]	1xCarbamidomethyl [C20]	0	1	16	-0.521104	0.969938	0.353294	1.72227	1.49104	0.215782	0.818997	1.99885	3.30864	2.42508	0.428831	1.30979	0.409079	0.999952
+pH fractionation/SP	Q5VW32	Q5VW32-2; Q5VW32	ADHTLSSLEPAYSAK	[K].ADHTLSSLEPAYSAK.[W]		9.74898e-05	1	3	-2.66076	-1.61093	2.35497	2.39035	1.04983	0.616664	0.888589	-3.02906	-3.70214	2.44551		-0.673076		NA
+pH fractionation/SP	P80303	P80303; P80303-2	ADIEEIK	[K].ADIEEIK.[S]		0.0025538	1	2	0.223918	1.95236	0.286064		1.72844		NA	0.643702	1.3176	1.01391		0.673903		NA
+pH fractionation/SP	O75369-8	O75369-9; O75369-5; O75369-2; O75369-8; O75369-7; O75369-4; O75369-6; O75369; O75369-3	ADIEMPFDPSK	[K].ADIEMPFDPSK.[V]		4.19381e-05	1	14	1.12709	0.499687	0.0326447	0.736012	-0.627401	0.214235	0.818997	0.442749	-2.44456	0.249163	0.549663	-2.88731	0.00115774	0.999952
+pH fractionation/SP	P05198	P05198	ADIEVACYGYEGIDAVK	[R].ADIEVACYGYEGIDAVK.[E]	1xCarbamidomethyl [C7]	0	1	11	-0.0848438	-0.0539863	0.696611	1.34601	0.0308575	0.973558	0.99212	0.634902	1.13396	1.822	0.211085	0.499056	0.662005	0.999952
+pH fractionation/SP	P61221	P61221	ADIFMFDEPSSYLDVK	[K].ADIFMFDEPSSYLDVK.[Q]	1xOxidation [M5]	0	1	4	-3.41989	-1.67807	0.784161	3.33571	1.74182	0.416493	0.838518	-0.950545	-0.425133	1.81868	0.0491863	0.525412	0.724226	0.999952
+pH fractionation/SP	P61221	P61221	ADIFMFDEPSSYLDVK	[K].ADIFMFDEPSSYLDVK.[Q]		0	1	16	0.741732	0.965972	0.453768	2.47902	0.224241	0.884984	0.96819	2.55766	3.65556	2.15336	0.590113	1.0979	0.442373	0.999952
+pH fractionation/SP	Q92896-2	Q92896; Q92896-2; Q92896-3	ADIFVDPVLHTACALDIK	[K].ADIFVDPVLHTACALDIK.[H]	1xCarbamidomethyl [C13]	0	1	5	-0.424383	0.831031	0.413739	0.642897	1.25541	0.0466701	0.818997	0.0696156	1.21894	1.38576	0.706007	1.14932	0.269744	0.999952
+pH fractionation/SP	P42768	P42768	ADIGAPSGFK	[K].ADIGAPSGFK.[H]		4.19381e-05	1	3	1.74378	2.62545	0.275639	1.04127	0.881673	0.229241	0.818997	3.27596	2.84787	1.17569	1.03242	-0.428094	0.660284	0.999952
+pH fractionation/SP	P13637-3; P05023	P13637-3; P13637-2; P05023; P05023-4; P05023-3; P13637	ADIGVAMGIAGSDVSK	[K].ADIGVAMGIAGSDVSK.[Q]		0	2	11	0.848371	-1.21504	0.663813	2.97579	-2.06342	0.306169	0.819326	-1.47942	-1.55118		0.687346	-0.0717527		NA
+pH fractionation/SP	Q53H82	Q53H82	ADIIYPGHGPVIHNAEAK	[K].ADIIYPGHGPVIHNAEAK.[I]		0	1	2	-4.16492	-0.93879	0.704155	3.15142	3.22613	0.161091	0.818997	1.82152	2.59844	0.902859	0.894363	0.776924	0.412812	0.999952
+pH fractionation/SP	P52272	P52272-2; P52272	ADILEDK	[R].ADILEDK.[D]		0.000518173	1	18	-0.397138	2.83617	1.90128		3.2333		NA	2.58153						NA
+pH fractionation/SP	P52272	P52272-2; P52272	ADILEDKDGK	[R].ADILEDKDGK.[S]		6.09156e-05	1	18	3.74395	1.91151	0.284297	3.90338	-1.83244	0.462881	0.849564	1.91028	0.198956	2.69805	0.707294	-1.71132	0.341233	0.999952
+pH fractionation/SP	Q9H074	Q9H074; Q9H074-3; Q9H074-2	ADILQVGLR	[R].ADILQVGLR.[E]		6.09156e-05	1	12	1.35231	1.10823	0.378207	0.657244	-0.244079	0.606904	0.885855	0.214519	-0.412097	1.24387	1.45429	-0.626616	0.600931	0.999952
+pH fractionation/SP	Q9UIB8	Q9UIB8; Q9UIB8-6; Q9UIB8-2; Q9UIB8-3; Q9UIB8-4; Q9UIB8-5	ADINTQADPYTTTK	[K].ADINTQADPYTTTK.[R]		3.35083e-05	1	2	-0.0303332		2.98268				NA	-1.49043	-2.68887			-1.19843		NA
+pH fractionation/SP	Q9Y487	Q9Y487	ADIPLPEGEASPPAPPLK	[R].ADIPLPEGEASPPAPPLK.[Q]		0.000542627	1	1	-2.79736	-0.444999	0.098009	3.18772	2.35236	0.395232	0.833515	-0.756195	1.25577	2.79381	1.44801	2.01196	0.43119	0.999952
+pH fractionation/SP	Q03701	Q03701	ADIVLR	[K].ADIVLR.[R]		0.00870853	1	5	-3.18243	-2.50366	1.46833	2.20057	0.678769	0.679734	0.904835	-1.23392	-0.720415	1.19466	0.797227	0.513509	0.638048	0.999952
+pH fractionation/SP	Q9P289	O00506-3; O00506; Q9P289-2; O00506-2; MST4_5570_I2; Q9P289	ADIWSLGITAIELAK	[K].ADIWSLGITAIELAK.[G]		0	1	4	-2.90817	-1.62228	1.49912	0.693216	1.28589	0.385678	0.83164	-0.523695						NA
+pH fractionation/SP	P06748-3; P06748	P06748-2; P06748-3; P06748	ADKDYHFK	[K].ADKDYHFK.[V]		0.000114852	2	28	-2.42919	-1.72212	1.38666	2.14353	0.707067	0.656484	0.899257	-0.37838	-0.233316	1.50302	1.12659	0.145064	0.900049	0.999952
+pH fractionation/SP	P06748-3; P06748	P06748-2; P06748-3; P06748	ADKDYHFKVDNDENEHQLSLR	[K].ADKDYHFKVDNDENEHQLSLR.[T]		0	2	23	-1.50449	-1.46224	0.145677	1.95215	0.0422526	0.978687	0.993145	1.04758	0.917048	2.15864	1.75058	-0.130536	0.939071	0.999952
+pH fractionation/SP	P56192	P56192	ADKNEVAAEVAK	[K].ADKNEVAAEVAK.[L]		3.35083e-05	1	9	1.66635	0.0959961	0.698924	2.46904	-1.57035	0.344179	0.824979	-0.615355	-0.131584	2.6854	0.333075	0.483771	0.82525	0.999952
+pH fractionation/SP	Q14204	Q14204	ADLAAVEAK	[K].ADLAAVEAK.[V]		0.000192563	1	5	4.85366	2.71713	1.73596	1.59688	-2.13653	0.260302	0.818997	-0.330253	2.08737	3.20858	0.466952	2.41762	0.388694	0.999952
+pH fractionation/SP	P68036-3	P68036-3; P68036-2; P68036	ADLAEEYSK	[R].ADLAEEYSK.[D]		9.74898e-05	1	12	2.02024	0.29457	0.54145	2.07048	-1.72567	0.234655	0.818997	0.490284	-0.240732	1.58486	0.245571	-0.731016	0.585243	0.999952
+pH fractionation/SP	Q8N1G4	Q8N1G4	ADLATAPPHVTVVR	[K].ADLATAPPHVTVVR.[-]		4.19381e-05	1	18	1.83936	0.75535	0.0679141	2.49832	-1.08401	0.494286	0.856504	-0.0627459	0.577304	2.17126	0.888622	0.64005	0.661173	0.999952
+pH fractionation/SP	P61106	P61106	ADLEAQR	[K].ADLEAQR.[D]		0.00586905	1	5	-0.39707	-2.41483	0.414495	1.79791	-2.01776	0.136065	0.818997	-0.738052	-3.15324			-2.41519		NA
+pH fractionation/SP	Q15031	Q15031	ADLEGSLDSK	[K].ADLEGSLDSK.[I]		4.19381e-05	1	5	-2.2161		1.51233				NA	-4.58311						NA
+pH fractionation/SP	P02533	P02533	ADLEMQIESLK	[R].ADLEMQIESLK.[E]	1xOxidation [M5]	4.19381e-05	1	4	4.0756	4.41268	0.388622		0.337076		NA	0.417881	2.18195	4.42021	1.4051	1.76407	0.637514	0.999952
+pH fractionation/SP	P02533	P02533	ADLEMQIESLK	[R].ADLEMQIESLK.[E]		4.19381e-05	1	2	0.793677	0.425472	0.254512	2.19393	-0.368206	0.787117	0.9367	-0.541566	-1.08073	3.26555	1.2716	-0.539165	0.801581	0.999952
+pH fractionation/SP	P13645	P13645	ADLEMQIESLTEELAYLK	[K].ADLEMQIESLTEELAYLK.[K]	1xOxidation [M5]	0	1	6	-1.14319		1.15382				NA	-2.87463	-1.008	1.09488	0.566177	1.86664	0.120911	0.999952
+pH fractionation/SP	P13645	P13645	ADLEMQIESLTEELAYLK	[K].ADLEMQIESLTEELAYLK.[K]		0	1	3	-1.19162	-0.990403	1.49991	1.12995	0.20122	0.883876	0.967903	-1.78332	-0.657333	1.39933		1.12599		NA
+pH fractionation/SP	O75691	O75691	ADLFPILMR	[R].ADLFPILMR.[I]		0.000177325	1	7	-1.39913	-1.25662	0.648418	0.416038	0.142509	0.805704	0.942986	-2.5813	-3.37294	0.976507		-0.791644		NA
+pH fractionation/SP	Q99523	Q99523	ADLGALELWR	[K].ADLGALELWR.[T]		4.19381e-05	1	7	1.69404	0.951017	0.27786	0.673344	-0.743025	0.152011	0.818997	0.526893	-0.413517		0.735359	-0.94041		NA
+pH fractionation/SP	Q14669-2; Q14669-3	Q14669-2; Q14669-4; Q14669; Q14669-3	ADLGLWR	[R].ADLGLWR.[G]		0.00490142	2	4	2.23295	1.83858	1.39032	0.301163	-0.394365	0.65619	0.899252	1.86538	0.689719	1.20594	1.72536	-1.17566	0.388147	0.999952
+pH fractionation/SP	O95707	O95707	ADLHGAIISVTK	[K].ADLHGAIISVTK.[S]		4.19381e-05	1	5	-1.21467	-3.04	0.269926	0.115979	-1.82533	0.000422751	0.436786	-1.58034	-2.86952	0.807318	0.278096	-1.28918	0.0723164	0.999952
+pH fractionation/SP	P99999	P99999	ADLIAYLK	[R].ADLIAYLK.[K]		0.000246334	1	10	0.019803	-1.88071			-1.90051		NA	-2.47386	-1.92294	1.5064	0.0733685	0.550914	0.657499	0.999952
+pH fractionation/SP	Q8WUA4	Q8WUA4	ADLIPYQDSPEGPDHSSASSGVPNPPK	[K].ADLIPYQDSPEGPDHSSASSGVPNPPK.[A]		4.19381e-05	1	3	2.69522	2.33795	0.420869	1.51766	-0.357268	0.714427	0.913926	1.01522	1.09067	1.93001	0.335018	0.0754506	0.961754	0.999952
+pH fractionation/SP	Q92888-3	Q92888-4; Q92888-3; Q92888; Q92888-2	ADLISEDVQR	[R].ADLISEDVQR.[R]		0.000114852	1	3	-0.14286	-0.282575	1.50238		-0.139715		NA	-1.52687		0.0431215				NA
+pH fractionation/SP	Q8N3C0	Q8N3C0	ADLIVTTPEK	[K].ADLIVTTPEK.[W]		0.00046274	1	1	-1.8386	2.47043	0.263483		4.30903		NA	2.24332	1.13895	1.67485	0.503027	-1.10437	0.466044	0.999952
+pH fractionation/SP	Q96CV9	Q96CV9; Q96CV9-3; Q96CV9-2	ADLLGIVSELQLK	[K].ADLLGIVSELQLK.[L]		0.00856563	1	1		-3.55232		0.797624			NA	-1.38503		0.878871				NA
+pH fractionation/SP	P08195-4	P08195-3; P08195-2; P08195; P08195-4	ADLLLSTQPGR	[K].ADLLLSTQPGR.[E]		4.19381e-05	1	18	1.7636	2.02335	0.522116	0.2001	0.25975	0.466142	0.850453	2.48715	1.87014	0.907698	1.26596	-0.617018	0.530374	0.999952
+pH fractionation/SP	P08195-4	P08195-3; P08195-2; P08195; P08195-4	ADLLLSTQPGREEGSPLELER	[K].ADLLLSTQPGREEGSPLELER.[L]		0	1	7	-3.60356	-1.46318			2.14038		NA	-0.573813	-1.63709	0.386981	0.539989	-1.06328	0.0997155	0.999952
+pH fractionation/SP	Q15269	Q15269	ADLLQREEEEEEEEDQEGDRETTIR	[K].ADLLQREEEEEEEEDQEGDRETTIR.[G]		0	1	2	1.48686	0.585489			-0.901373		NA	-1.40567		2.28587				NA
+pH fractionation/SP	Q9H089	Q9H089	ADLLTAEQR	[K].ADLLTAEQR.[S]		0.000605261	1	5	-0.667944	-1.25717	0.374567	0.393015	-0.589228	0.133314	0.818997	-1.4507	-1.56136	1.90305	0.944943	-0.110658	0.93246	0.999952
+pH fractionation/SP	Q9BQG0-2	Q9BQG0; Q9BQG0-2	ADLNIILSSPEQLELFLLAQQK	[K].ADLNIILSSPEQLELFLLAQQK.[V]		4.19381e-05	1	1	-1.47642	-2.57724	0.888065	2.42033	-1.10082	0.500616	0.858335	-1.39465						NA
+pH fractionation/SP	Q96C19	Q96C19	ADLNQGIGEPQSPSR	[R].ADLNQGIGEPQSPSR.[R]		0	1	6	-5.43503		0.363549				NA		2.53482					NA
+pH fractionation/SP	Q15075	Q15075	ADLQNHLDTAQNALQDK	[R].ADLQNHLDTAQNALQDK.[Q]		0	1	2	-0.254384	0.182937	0.510617	1.26967	0.437321	0.609403	0.886621	-2.66279	-3.57256	2.41359	1.36175	-0.909775	0.600019	0.999952
+pH fractionation/SP	Q13045	Q13045; Q13045-3; Q13045-2	ADLTALFLPR	[K].ADLTALFLPR.[Q]		4.19381e-05	1	10	-1.53269	-3.35618	2.6426	1.48819	-1.82349	0.381141	0.831052	-0.297384						NA
+pH fractionation/SP	P31930	P31930	ADLTEYLSTHYK	[R].ADLTEYLSTHYK.[A]		0	1	26	1.19976	1.86698	0.600466	2.76907	0.667218	0.691599	0.907849	3.00808	2.76456	2.36854	2.66209	-0.243528	0.911476	0.999952
+pH fractionation/SP	Q8NB46	Q8NB46	ADLTVLDENK	[K].ADLTVLDENK.[N]		0.000133665	1	1	3.26868	0.435891	0.417721	3.88119	-2.83278	0.277172	0.819124	2.16212	2.18753	2.67781	3.15834	0.025407	0.992029	0.999952
+pH fractionation/SP	Q9NP73-2	Q9NP73-2; Q9NP73	ADLVISHAGAGSCLETLEK	[K].ADLVISHAGAGSCLETLEK.[G]	1xCarbamidomethyl [C13]	0	1	2	-2.45368	-2.00381	1.3912	0.38967	0.449873	0.618274	0.889212	-2.25271	-2.72258	2.40897		-0.469874		NA
+pH fractionation/SP	Q6PJG2	Q6PJG2	ADLVWQPWEDLESSR	[K].ADLVWQPWEDLESSR.[E]		0	1	2		1.75646					NA	1.27577	0.87963	0.764441	0.886228	-0.396141	0.643966	0.999952
+pH fractionation/SP	Q9NSE4	Q9NSE4	ADLYLEGK	[R].ADLYLEGK.[D]		0.000387362	1	10	3.09449	1.25168	0.703613	2.2003	-1.84282	0.243464	0.818997	-0.0979424	0.74275	2.17104	0.507164	0.840693	0.6436	0.999952
+pH fractionation/SP	P35580-3	P35580-2; P35580; P35580-5; P35580-3; P35580-4	ADMEDLMSSK	[R].ADMEDLMSSK.[D]		4.19381e-05	1	14	-0.414025	-1.41756	0.222565	1.29986	-1.00353	0.257911	0.818997	-2.34582	-0.735127	2.52952		1.61069		NA
+pH fractionation/SP	P35580-3	P35580-2; P35580; P35580-5; P35580-3; P35580-4	ADMEDLMSSKDDVGKNVHELEK	[R].ADMEDLMSSKDDVGKNVHELEK.[S]		0	1	1	-0.300835	-0.165615	0.728826	1.06399	0.13522	0.873526	0.965292	-0.0797981	1.20033	2.09726	0.128156	1.28013	0.473209	0.999952
+pH fractionation/SP	P26639-2	P26639; P26639-2	ADMETLQR	[K].ADMETLQR.[I]		0.000387362	1	14	2.83227	-0.10171	1.05296	2.81015	-2.93398	0.178352	0.818997	-1.08677	-0.900699	2.25905	1.1322	0.186068	0.923617	0.999952
+pH fractionation/SP	P28838	P28838; P28838-2	ADMGGAATICSAIVSAAK	[R].ADMGGAATICSAIVSAAK.[L]	1xCarbamidomethyl [C10]	3.35083e-05	1	2	2.07897	0.0416753	0.267973	1.91721	-2.0373	0.14241	0.818997	-1.10998	-0.121328	2.69623	0.0834022	0.988656	0.656574	0.999952
+pH fractionation/SP	Q9Y6D9	Q9Y6D9; Q9Y6D9-3	ADMLEMELK	[R].ADMLEMELK.[M]		0.000950814	1	1	0.0859777	-0.4169	0.360103	1.46498	-0.502878	0.581947	0.879369	0.950926	0.0205103	0.241846	1.62913	-0.930416	0.508137	0.999952
+pH fractionation/SP	P40939	P40939	ADMVIEAVFEDLSLK	[K].ADMVIEAVFEDLSLK.[H]	1xOxidation [M3]	3.35083e-05	1	1	-2.01409	-2.21489	0.56913	1.31499	-0.200793	0.820161	0.947934	-2.24239	-2.91192	1.3447	1.56336	-0.669537	0.64146	0.999952
+pH fractionation/SP	P36871	P36871-2; P36871; P36871-3	ADNFEYSDPVDGSISR	[K].ADNFEYSDPVDGSISR.[N]		0	1	9	0.392722	-1.49709	0.597015	2.72918	-1.88981	0.298301	0.819326	-2.49231	-1.79149	0.994901		0.70082		NA
+pH fractionation/SP	Q92621	Q92621	ADNVVNIAR	[K].ADNVVNIAR.[Y]		0.000236593	1	7	1.91189	-1.04402	0.162049	0.535481	-2.95592	0.00079145	0.436786	-1.2491	-2.70892	0.313677	0.5761	-1.45982	0.031801	0.999952
+pH fractionation/SP	Q9HCK8; Q8TD26	Q9HCK8; Q9HCK8-2; Q8TD26-3; Q8TD26	ADPALCFLEK	[R].ADPALCFLEK.[AV]	1xCarbamidomethyl [C6]	0.000420983	2	1	-1.03964	-0.511857	0.502073	1.78043	0.527783	0.637494	0.893958	-0.0451665	1.2731	2.08074	0.106566	1.31826	0.458044	0.999952
+pH fractionation/SP	Q3L8U1; Q9P2D1	Q3L8U1-3; Q3L8U1; Q9P2D1; Q3L8U1-2	ADPALCFLER	[R].ADPALCFLER.[V]	1xCarbamidomethyl [C6]	0.00298714	2	1	-2.78435	0.750283	0.160536	0.894341	3.53464	0.00252847	0.513374	0.768129	0.847061	0.35542	0.222438	0.0789323	0.773034	0.999952
+pH fractionation/SP	Q6P6C2-1	Q6P6C2-3; Q6P6C2; Q6P6C2-1	ADPDAAHRPR	[K].ADPDAAHRPR.[I]		0.00164914	1	2	-2.03549	-1.34898	2.48161	2.08031	0.68651	0.732073	0.919505	-0.741752	-2.54124	1.93345	1.65015	-1.79949	0.341882	0.999952
+pH fractionation/SP	Q9NX24	Q9NX24	ADPDGPEAQAEACSGER	[K].ADPDGPEAQAEACSGER.[T]	1xCarbamidomethyl [C13]	0	1	5	1.01807	2.77684	1.15967		1.75877		NA	2.11273	3.19825	0.618436	0.911678	1.08552	0.201537	0.999952
+pH fractionation/SP	Q9UBT2	Q9UBT2; Q9UBT2-2	ADPEAAWEPTEAEAR	[R].ADPEAAWEPTEAEAR.[A]		0	1	6	-1.34193	-3.3863	0.0885057		-2.04437		NA							NA
+pH fractionation/SP	Q9Y6E0	Q9Y6E0; Q9Y6E0-2	ADPEELFTK	[K].ADPEELFTK.[L]		0.000246334	1	3	1.88235	-0.750548	0.699693	3.18614	-2.6329	0.231219	0.818997	1.12175	-2.48577		2.53697	-3.60753		NA
+pH fractionation/SP	P30479; P01889; P30492; P30464	P30484; P30479; P01889; Q31612; P30492; P30485; P18465; Q29940; Q29718; Q29836; P30464; Q04826; P03989; P30493; Q95365; P30462; P30461; P30487; P30460; P30483; P30495; P30480; Q31610; P30475; P30466; P30488; P18463; P30486	ADPPKTHVTHHPISDHEATLR	[R].ADPPKTHVTHHPISDHEATLR.[C]		4.19381e-05	4	1		0.0152998					NA	0.180201	-0.00989581	1.26355	0.653108	-0.190097	0.832564	0.999952
+pH fractionation/SP	Q92696	Q92696	ADPQDALR	[R].ADPQDALR.[C]		0.00510546	1	3	0.0560885	4.38765	0.91441		4.33156		NA	2.61168	3.88287	4.48239	1.09471	1.27118	0.732647	0.999952
+pH fractionation/SP	Q15418-2	Q15418-2; Q15418; Q15418-4	ADPSHFELLK	[K].ADPSHFELLK.[V]		6.09156e-05	1	2	-0.933282	0.149758	0.648712	0.571734	1.08304	0.218522	0.818997	-1.31006	0.786617	0.275296	0.0165142	2.09668	0.00854035	0.999952
+pH fractionation/SP	Q567U6	Q567U6	ADPSILQNLR	[K].ADPSILQNLR.[A]		0.002768	1	2	-1.08961	-0.0463741	1.7576	2.06322	1.04324	0.541463	0.868326	-1.42293	-1.19218	2.49627	1.70725	0.230749	0.901243	0.999952
+pH fractionation/SP	Q9UNF0	Q9UNF0; Q9UNF0-2	ADPSLNPEQLK	[K].ADPSLNPEQLK.[K]		4.19381e-05	1	7	4.56517	1.87657	0.499584	2.5454	-2.6886	0.147051	0.818997	2.2783	2.41411	2.25496	0.0740444	0.135816	0.940701	0.999952
+pH fractionation/SP	P51812	Q15349-2; Q15349; P51812; Q15349-3	ADPSQFELLK	[K].ADPSQFELLK.[V]		0.000224101	1	1	-2.1719	-2.09939	1.51026	0.432293	0.0725119	0.940117	0.983044	0.274468	-1.15993	0.569473	0.563833	-1.43439	0.0362136	0.999952
+pH fractionation/SP	Q16254	Q16254	ADPTGVLELPK	[K].ADPTGVLELPK.[E]		0.00440896	1	2	0.0766658	0.975501	1.07074	0.87005	0.898835	0.322242	0.820259	0.332879	0.300224	0.352274	1.62674	-0.032655	0.97452	0.999952
+pH fractionation/SP	Q15014	Q15014	ADPTVESEEAFK	[R].ADPTVESEEAFK.[N]		0.000177325	1	6	1.70491	1.41186	1.46634		-0.293046		NA	-1.29025	-0.537402	1.9689		0.752845		NA
+pH fractionation/SP	P31146	P31146	ADQCYEDVR	[K].ADQCYEDVR.[V]	1xCarbamidomethyl [C4]	0.000177325	1	32	8.14629	5.40792	0.438673	2.30006	-2.73836	0.112776	0.818997	6.37949	4.89498	1.59779	2.55933	-1.48451	0.442115	0.999952
+pH fractionation/SP	Q9Y490	Q9Y490	ADQDSEAMK	[K].ADQDSEAMK.[R]		0.000660158	1	1	-3.53069	-0.981357	1.12644		2.54933		NA		-0.597752					NA
+pH fractionation/SP	P62879	P62879-2; P62879	ADQELLMYSHDNIICGITSVAFSR	[R].ADQELLMYSHDNIICGITSVAFSR.[S]	1xCarbamidomethyl [C15]	0	1	2	0.0766185	-0.416574	0.960963	1.69649	-0.493192	0.683917	0.905307	1.13409	1.51983	1.70772	0.782633	0.385739	0.740057	0.999952
+pH fractionation/SP	P62873	P62873; P62873-2	ADQELMTYSHDNIICGITSVSFSK	[R].ADQELMTYSHDNIICGITSVSFSK.[S]	1xCarbamidomethyl [C15]	0	1	14	-0.859936	-0.634168	0.505094	0.857137	0.225767	0.765704	0.929988	-0.372083	0.300644	2.05556	0.624339	0.672727	0.616358	0.999952
+pH fractionation/SP	P52434	P52434-4; P52434-3; P52434	ADQFEYVMYGK	[R].ADQFEYVMYGK.[V]		4.19381e-05	1	22	4.73729	4.16208	0.410346	1.6408	-0.575209	0.587483	0.880727	3.49127	3.21139	1.15066	0.217457	-0.279877	0.700136	0.999952
+pH fractionation/SP	Q9HC35	Q9HC35; Q9HC35-2	ADQFLVGTSR	[K].ADQFLVGTSR.[N]		0.000476102	1	3	-1.47949	-0.987896	1.08916	2.28233	0.491592	0.753271	0.92604	0.529391	0.336392	0.995152	0.854628	-0.192999	0.854437	0.999952
+pH fractionation/SP	Q9H4M9	Q9NZN3; Q9H4M9	ADQIETQQLMR	[K].ADQIETQQLMR.[V]		4.19381e-05	1	5	-1.53671	-3.07297	0.409358	0.824407	-1.53626	0.0628322	0.818997	-1.20534	-1.84338	1.42306	0.145112	-0.638043	0.59264	0.999952
+pH fractionation/SP	Q6KC79	Q6KC79-2; Q6KC79	ADQQLVEIDK	[K].ADQQLVEIDK.[K]		0.000177325	1	2		-2.74924		2.84005			NA	-3.06877	-0.0889983		0.193043	2.97977		NA
+pH fractionation/SP	Q6KC79	Q6KC79-2; Q6KC79	ADQQLVEIDKK	[K].ADQQLVEIDKK.[Y]		0.000877399	1	1	-0.961441	0.725372	1.79541		1.68681		NA	0.000848847	-0.00286332	1.07966	0.367631	-0.00371217	0.996745	0.999952
+pH fractionation/SP	Q00534	Q00534	ADQQYECVAEIGEGAYGK	[R].ADQQYECVAEIGEGAYGK.[V]	1xCarbamidomethyl [C7]	0	1	16	0.418572	-1.65587	1.53604	1.33865	-2.07444	0.204829	0.818997	-0.490874	-1.0515	0.790884	0.386079	-0.560625	0.331795	0.999952
+pH fractionation/SP	P62263	P62263	ADRDESSPYAAMLAAQDVAQR	[K].ADRDESSPYAAMLAAQDVAQR.[C]	1xOxidation [M12]	0	1	8	-3.24904	-1.07609	3.94742	0.218061	2.17295	0.514015	0.861298	1.92381	-2.74323		0.125016	-4.66704		NA
+pH fractionation/SP	P62263	P62263	ADRDESSPYAAMLAAQDVAQR	[K].ADRDESSPYAAMLAAQDVAQR.[C]		0	1	34	0.224979	-0.0583245	0.290575	2.33818	-0.283304	0.8452	0.955815	-0.764387	-0.110198	2.59044	1.81782	0.654189	0.738402	0.999952
+pH fractionation/SP	Q9NXE4-2; Q9NXE4-4	Q9NXE4; Q9NXE4-6; Q9NXE4-8; Q9NXE4-2; Q9NXE4-4	ADSINKPFAQQCQDLVK	[K].ADSINKPFAQQCQDLVK.[V]	1xCarbamidomethyl [C12]	4.19381e-05	2	2		0.139508					NA	-0.683021	-0.928789	1.86675	0.296077	-0.245768	0.87184	0.999952
+pH fractionation/SP	Q15424-3; Q14151	Q15424; Q15424-3; SAFB_793_I0; Q15424-2; Q14151; Q15424-4	ADSLLAVVK	[K].ADSLLAVVK.[R]		6.09156e-05	2	52	-0.659343	0.670967	1.25663	1.86147	1.33031	0.362913	0.829318	-0.923213	-1.9165	4.74611	1.57885	-0.993291	0.743163	0.999952
+pH fractionation/SP	Q15424-3; Q14151	Q15424; Q15424-3; SAFB_793_I0; Q15424-2; Q14151; Q15424-4	ADSLLAVVKR	[K].ADSLLAVVKR.[E]		6.09156e-05	2	9	-5.15501	-2.59327	1.1583	2.70279	2.56174	0.205816	0.818997	-3.30347	-4.97874	1.62477		-1.67528		NA
+pH fractionation/SP	Q08AM6	Q08AM6; Q08AM6-2	ADSPSIDYAELLQHFEK	[K].ADSPSIDYAELLQHFEK.[V]		9.74898e-05	1	2	-0.0601527	-1.91386	0.107319	1.83173	-1.85371	0.155047	0.818997	-2.15685	-2.55151	2.11204	0.503016	-0.394652	0.821157	0.999952
+pH fractionation/SP	Q53F19	Q53F19; Q53F19-2	ADSVSSSNIK	[R].ADSVSSSNIK.[N]		0.00551384	1	1	-2.60332		0.923583				NA	-1.14359	-1.80862	1.27968	0.251237	-0.665036	0.539444	0.999952
+pH fractionation/SP	Q92900	Q92900-2; Q92900	ADSVVVLLCR	[K].ADSVVVLLCR.[Q]	1xCarbamidomethyl [C9]	6.09156e-05	1	8	-1.28909	1.79689	0.44818		3.08598		NA	1.00669	2.44014	2.08248	0.514741	1.43345	0.430046	0.999952
+pH fractionation/SP	P46013; P46013-2	P46013; P46013-2	ADTEEEFLAFR	[K].ADTEEEFLAFR.[K]		4.19381e-05	2	9	3.28555	3.60413		4.37753	0.318578		NA	2.5578	0.339782	0.13892	4.84729	-2.21802	0.582765	0.999952
+pH fractionation/SP	P43403	P43403-2; P43403; P43403-3	ADTEEMMR	[K].ADTEEMMR.[E]		0.000950814	1	7	2.35184	-0.193929	0.139056	1.97686	-2.54577	0.0901085	0.818997	0.476203	-3.10974	1.37675	3.23446	-3.58594	0.151994	0.999952
+pH fractionation/SP	Q8IV48	Q8IV48	ADTFPQVLK	[R].ADTFPQVLK.[K]		0.000236593	1	3	2.2147	2.05819	0.43377	0.783937	-0.156509	0.777302	0.933597	0.754863	1.45761	1.70735	0.135775	0.702748	0.619801	0.999952
+pH fractionation/SP	Q9Y4E8	Q9Y4E8; Q9Y4E8-4; Q9Y4E8-3; Q9Y4E8-2	ADTIDTIEK	[K].ADTIDTIEK.[E]		0.000332976	1	1	0.690287	0.243347	0.36323	1.19045	-0.44694	0.559744	0.87314	0.607613	-0.402078		0.200884	-1.00969		NA
+pH fractionation/SP	P43686	P43686-2; P43686	ADTLDPALLRPGR	[R].ADTLDPALLRPGR.[L]		3.35083e-05	1	16	-1.25454	-0.876871	0.163389	0.34086	0.377666	0.158583	0.818997	-0.788417	-0.779184	0.749206	0.806951	0.0092327	0.989108	0.999952
+pH fractionation/SP	P04259; P02538	P04259; P02538; P48668	ADTLTDEINFLR	[K].ADTLTDEINFLR.[A]		0	2	16	-4.07721	-3.25593	0.982936	0.999518	0.821282	0.494507	0.856644	-3.37472	-5.24186	2.18866	1.4917	-1.86714	0.378358	0.999952
+pH fractionation/SP	Q9UHD8	Q9UHD8-7; Q9UHD8-2; Q9UHD8-8; Q9UHD8-3; Q9UHD8-5; Q9UHD8-9; Q9UHD8-4; Q9UHD8	ADTLTLEER	[K].ADTLTLEER.[V]		9.74898e-05	1	8	2.24671	0.137906	0.647756	2.00121	-2.10881	0.157485	0.818997	-1.41069	-1.16626	3.51618	0.151718	0.244424	0.931606	0.999952
+pH fractionation/SP	Q15019-2	Q15019-2; Q15019-3; Q15019	ADTLTLK	[K].ADTLTLK.[E]		0.00468806	1	6	-1.4223	-3.21491	0.670774		-1.79261		NA							NA
+pH fractionation/SP	Q16181	Q16181; Q16181-2	ADTLTPEECQQFK	[K].ADTLTPEECQQFK.[K]	1xCarbamidomethyl [C9]	0.000114852	1	1	-2.32543	-4.76949	0.553505		-2.44406		NA	-2.34697	-2.26586	1.32031	1.07586	0.0811111	0.95243	0.999952
+pH fractionation/SP	Q15833-3	Q15833; Q15833-3; Q15833-2	ADTPSLGEGPEK	[K].ADTPSLGEGPEK.[T]		6.09156e-05	1	6	-1.08487	-0.118716	0.341762		0.966154		NA	-2.21544	0.343436	2.46881	0.037265	2.55888	0.280381	0.999952
+pH fractionation/SP	P84090	P84090	ADTQTYQPYNK	[R].ADTQTYQPYNK.[D]		4.19381e-05	1	3	-2.48463	-1.22217	5.11477	0.480607	1.26246	0.674091	0.903822	-1.87319	-1.5797	3.24237	0.0823154	0.293495	0.911032	0.999952
+pH fractionation/SP	Q7Z417	Q7Z417	ADTSSQGALVFLSK	[K].ADTSSQGALVFLSK.[D]		0	1	6	1.76319	2.57681	0.766266	1.13376	0.813617	0.361289	0.829018	3.12077	2.99754	2.32035	2.55263	-0.123228	0.953633	0.999952
+pH fractionation/SP	P08575	P08575; P08575-4	ADTTICLK	[K].ADTTICLK.[W]	1xCarbamidomethyl [C6]	0.000420983	1	14	-0.44963	-1.21058	0.450867	0.794019	-0.760948	0.251272	0.818997	-0.792845	0.375427	1.48616	0.550662	1.16827	0.382721	0.999952
+pH fractionation/SP	O60885	O60885-3; O60885; O60885-2	ADTTTPTTIDPIHEPPSLPPEPK	[K].ADTTTPTTIDPIHEPPSLPPEPK.[T]		0	1	7		-1.59742					NA	-3.51949	-2.80998	1.48569	1.41647	0.709514	0.673319	0.999952
+pH fractionation/SP	Q15059	Q15059; Q15059-2	ADTTTPTTSAITASR	[K].ADTTTPTTSAITASR.[S]		3.35083e-05	1	2	-2.63036	-2.70398	0.592283	2.69434	-0.0736295	0.963623	0.989665	-2.05098	-0.640244	1.64681	0.253948	1.41074	0.336153	0.999952
+pH fractionation/SP	O75165	O75165	ADTVGLACEAINR	[R].ADTVGLACEAINR.[M]	1xCarbamidomethyl [C8]	4.19381e-05	1	2	-0.0775839	-0.739132	1.25181	1.78257	-0.661548	0.626673	0.890688	-1.63055	-1.83938	3.46068	1.84321	-0.208832	0.946815	0.999952
+pH fractionation/SP	O00214-2	O00214-2; O00214	ADVAFHFNPR	[R].ADVAFHFNPR.[F]		4.19381e-05	1	5	0.258014	0.196171	0.754889	1.0665	-0.0618428	0.938602	0.982736	0.783038	-0.612861	0.683496	0.927169	-1.3959	0.103772	0.999952
+pH fractionation/SP	Q9UJV9	Q9UJV9	ADVDAIHEYLLLK	[K].ADVDAIHEYLLLK.[G]		0	1	5	-1.81647	1.70669			3.52316		NA	1.65708	2.23105	2.67429	0.21299	0.573971	0.790787	0.999952
+pH fractionation/SP	Q9BZE4	Q9BZE4; Q9BZE4-2; Q9BZE4-3	ADVDVQPYAFTTK	[R].ADVDVQPYAFTTK.[S]		0	1	9	-2.5278	-2.38199		0.944473	0.145808		NA	-1.27937	-3.04685			-1.76748		NA
+pH fractionation/SP	P46013; P46013-2	P46013; P46013-2	ADVEEEFLAFR	[K].ADVEEEFLAFR.[K]		3.35083e-05	2	10	-2.21916	-1.72584		1.98848	0.493319		NA	-1.12989	-1.45253	0.842849	1.09849	-0.322644	0.730816	0.999952
+pH fractionation/SP	P46013; P46013-2	P46013; P46013-2	ADVEEEFLALR	[K].ADVEEEFLALR.[K]		3.35083e-05	2	8	0.8948	1.64914	0.388747	0.869675	0.754335	0.242107	0.818997	2.31984	2.63235	0.842645	1.58209	0.312514	0.77772	0.999952
+pH fractionation/SP	P46013; P46013-2	P46013; P46013-2	ADVEEESLALR	[K].ADVEEESLALR.[K]		3.35083e-05	2	5	-2.52243	-3.91166		2.11845	-1.38923		NA	-0.710086	-0.499006	0.353145		0.21108		NA
+pH fractionation/SP	P46013; P46013-2	P46013; P46013-2	ADVEGELLACR	[K].ADVEGELLACR.[N]	1xCarbamidomethyl [C10]	4.19381e-05	2	6	-1.08937	-3.74209	0.493049		-2.65273		NA	-3.02656		1.31452				NA
+pH fractionation/SP	Q86VP6	Q86VP6; Q86VP6-2; Q86VP6-3	ADVFHAYLSLLK	[K].ADVFHAYLSLLK.[Q]		0	1	8	0.726848	1.87004	0.530443	3.40077	1.14319	0.595911	0.88257	2.03536	2.75736	1.19668	1.34356	0.722	0.57114	0.999952
+pH fractionation/SP	P23634; P20020	Q01814-7; P20020-3; Q16720-3; P23634-8; P20020-6; Q16720-4; P23634-2; Q01814; P20020-4; P23634-5; P23634-6; Q01814-4; Q16720-6; P23634-4; P20020-2; Q16720-7; Q16720; Q16720-5; Q01814-6; P20020-5; Q01814-5; P23634; P23634-3; P23634-7; Q16720-8; Q01814-2; Q01814-8; Q01814-3; Q16720-2; P20020	ADVGFAMGIAGTDVAK	[K].ADVGFAMGIAGTDVAK.[E]		4.19381e-05	2	2	1.15842	0.706537	0.380495	0.841138	-0.451882	0.444302	0.844336	1.24651	0.84813	0.686082	0.8681	-0.398383	0.56668	0.999952
+pH fractionation/SP	Q9NQX3-2	Q9NQX3; Q9NQX3-2	ADVIITSGGVSMGEK	[R].ADVIITSGGVSMGEK.[D]		4.19381e-05	1	2	4.85097	5.14534	0.34704	1.59361	0.294363	0.770197	0.931647	6.75879	5.81461	1.87906	1.26151	-0.944181	0.509928	0.999952
+pH fractionation/SP	P29144	TPP2_2_E1; P29144	ADVIPVHYYLIPPPTK	[K].ADVIPVHYYLIPPPTK.[T]		0.000360009	1	2		0.0617198					NA	-1.21987	-0.412359	1.87009	0.21218	0.80751	0.605709	0.999952
+pH fractionation/SP	Q08945	Q08945	ADVIQATGDAICIFR	[K].ADVIQATGDAICIFR.[E]	1xCarbamidomethyl [C12]	0	1	16	-2.42272	-2.15759	1.17751	1.40675	0.265127	0.841702	0.95474	-1.53856	-2.00634	0.315934	1.9448	-0.467774	0.701995	0.999952
+pH fractionation/SP	Q92542	Q92542-2; Q92542	ADVLFIAPR	[K].ADVLFIAPR.[E]		0.000236593	1	4	3.348	2.6295	0.295345	1.67282	-0.718499	0.486877	0.85501	1.60896	1.80092	3.31741	0.0706206	0.191958	0.943015	0.999952
+pH fractionation/SP	Q9P275	Q9P275	ADVLSGENAYMCAK	[K].ADVLSGENAYMCAK.[C]	1xCarbamidomethyl [C12]	3.35083e-05	1	5	-0.57937	0.126076	0.938569	0.812116	0.705446	0.380621	0.831052	1.10085	1.65264	0.952873	0.719744	0.551792	0.468349	0.999952
+pH fractionation/SP	Q9H0K6	Q9H0K6	ADVLSSFLDEK	[K].ADVLSSFLDEK.[T]		4.19381e-05	1	1	0.918512	-0.576251	0.251478	1.03681	-1.49476	0.0812539	0.818997	1.36574		0.253504				NA
+pH fractionation/SP	P04040	P04040	ADVLTTGAGNPVGDK	[K].ADVLTTGAGNPVGDK.[L]		0	1	9	4.21884	1.74891	1.59367	3.28678	-2.46993	0.306533	0.819326	2.84174	2.17503	1.93398	3.31391	-0.666709	0.77844	0.999952
+pH fractionation/SP	Q14146	Q14146	ADVQAVVSAVTLLR	[K].ADVQAVVSAVTLLR.[L]		0	1	3	0.0949293		0.220951				NA	-0.655322	0.671299		1.09276	1.32662		NA
+pH fractionation/SP	Q13263	Q13263; Q13263-2	ADVQSIIGLQR	[K].ADVQSIIGLQR.[F]		3.35083e-05	1	29	-0.878533	-1.23148	0.591132	1.02742	-0.352943	0.647964	0.896872	-0.933324	-1.23423	1.05321	0.775045	-0.300909	0.710571	0.999952
+pH fractionation/SP	Q9GZR7	Q9GZR7	ADVSAWK	[K].ADVSAWK.[D]		0.00308271	1	5	0.323728	-0.271845	0.405506	1.61199	-0.595573	0.568476	0.875925	-1.2932	-1.31954	2.68325	0.611052	-0.0263341	0.986971	0.999952
+pH fractionation/SP	O60306	O60306	ADVTINLNVR	[R].ADVTINLNVR.[D]		0.00314945	1	2		-1.63083		1.5469			NA	-2.87583	-0.541745	1.41933	0.667169	2.33408	0.169967	0.999952
+pH fractionation/SP	Q13813; Q13813-2	Q13813-3; Q13813; Q13813-2	ADVVESWIGEK	[K].ADVVESWIGEK.[E]		4.19381e-05	2	22	2.50475	3.70527	0.254595	1.10753	1.20052	0.141267	0.818997	4.08244	4.97998	1.56283	1.21243	0.897538	0.475847	0.999952
+pH fractionation/SP	Q9H300	Q9H300-2; Q9H300	ADWLDSIRPQK	[K].ADWLDSIRPQK.[E]		0.00285367	1	1	-1.46396	3.12391	0.650322		4.58787		NA	1.11494	1.98329	2.91718	1.49837	0.868356	0.67032	0.999952
+pH fractionation/SP	Q6P2Q9	Q6P2Q9	ADWWTNTAHYNR	[K].ADWWTNTAHYNR.[E]		0	1	8	0.922645	-0.108473	0.29073	1.65463	-1.03112	0.347667	0.824979	-0.406551	-0.550134	1.45901	0.553168	-0.143584	0.881091	0.999952
+pH fractionation/SP	Q9NQ29; Q9Y383	Q9NQ29-3; Q9Y383-2; Q9NQ29; Q9Y383; Q9Y383-3; Q96HJ9-2; Q9NQ29-2	ADYEIASK	[R].ADYEIASK.[E]		0.000553704	2	13	0.599739	-2.47736	2.7066		-3.0771		NA	-2.06058	-1.94323	1.41802	0.248485	0.117357	0.919215	0.999952
+pH fractionation/SP	P26640	P26640	ADYNLTR	[R].ADYNLTR.[I]		0.00401333	1	6	-0.809531	-1.94567	0.537589	0.509007	-1.13613	0.0997518	0.818997	-2.00125	-3.5943	1.39172	2.74321	-1.59305	0.420423	0.999952
+pH fractionation/SP	Q96RU3	Q96RU3-2; Q96RU3-4; Q96RU3-3; Q96RU3; Q96RU3-5	ADYSSILQK	[K].ADYSSILQK.[F]		9.74898e-05	1	16	-0.0378665	0.372104	0.443365	0.613529	0.40997	0.440546	0.842943	-2.28578	-2.09416	2.5726	1.25637	0.191617	0.913299	0.999952
+pH fractionation/SP	O43633	O43633	AEAAASALADADADLEER	[K].AEAAASALADADADLEER.[L]		0	1	3	6.30498	3.07086	1.10909	2.35137	-3.23412	0.0974732	0.818997	4.37863	4.57547	0.867769	2.33606	0.196844	0.897788	0.999952
+pH fractionation/SP	O60287	O60287	AEAAGLIGWLK	[R].AEAAGLIGWLK.[S]		4.19381e-05	1	6	3.17299	0.845302	0.53012	2.38114	-2.32768	0.173735	0.818997	1.96533	1.96424	2.08492	2.46804	-0.00109352	0.99956	0.999952
+pH fractionation/SP	Q969G3	Q969G3-3; Q969G3-5; Q969G3-4; Q969G3; Q969G3-6; Q969G3-2	AEAALEEESR	[R].AEAALEEESR.[Q]		9.74898e-05	1	4	-0.469126	-0.220213	0.606824	0.130346	0.248912	0.624215	0.890298	-1.81832	-1.65242	0.889341	1.46586	0.165905	0.875031	0.999952
+pH fractionation/SP	Q9UHJ6	Q9UHJ6	AEAAVESAVAGPQGR	[R].AEAAVESAVAGPQGR.[E]		0	1	2	-2.14451						NA	-0.497606	0.592581	3.45798	0.243985	1.09019	0.700001	0.999952
+pH fractionation/SP	Q8IZQ5	Q8IZQ5	AEAAVVAVAEK	[K].AEAAVVAVAEK.[R]		4.19381e-05	1	3	-0.827068	-3.95305	0.303147	0.666064	-3.12598	0.00493409	0.585999	-1.80042	-3.96451	0.91994	2.11728	-2.1641	0.31608	0.999952
+pH fractionation/SP	Q6NS38	Q6NS38; Q6NS38-2	AEADEIFQELEK	[K].AEADEIFQELEK.[E]		3.35083e-05	1	1	1.32982	0.672038	0.420475	1.50411	-0.657784	0.506119	0.859586	0.0161652	0.12517	2.80365	0.60379	0.109005	0.948182	0.999952
+pH fractionation/SP	P08238	P08238; Q58FF7	AEADKNDKAVK	[K].AEADKNDKAVK.[D]		0.000114852	1	3	-2.02127	-0.397372	0.884161	0.605095	1.6239	0.0584765	0.818997	-0.245036	-0.631717	1.77731	0.972529	-0.386681	0.757553	0.999952
+pH fractionation/SP	Q5T8P6	Q5T8P6; Q5T8P6-5; Q5T8P6-4; Q5T8P6-2; Q5T8P6-3	AEAEAAAVHGAR	[R].AEAEAAAVHGAR.[F]		4.19381e-05	1	1	1.99104	0.282574	0.651887	0.0405906	-1.70846	0.0391201	0.818997	-1.35069	-2.47122	3.40517	2.53805	-1.12053	0.696396	0.999952
+pH fractionation/SP	Q86Y46; P19013; Q8N1N4	Q7RTS7; Q86Y46; P12035; Q8N1N4-2; Q3SY84; P19013; Q8N1N4; Q86Y46-2	AEAEALYQTK	[K].AEAEALYQTK.[IFLYV]		4.19381e-05	3	3	6.72006	5.32415	1.16358	1.62857	-1.39591	0.293594	0.819326	6.01496	5.98951	1.3212	0.678027	-0.0254507	0.977741	0.999952
+pH fractionation/SP	P11498	P11498	AEAEAQAEELSFPR	[R].AEAEAQAEELSFPR.[S]		0	1	6	2.16428	-1.00133	0.650158	2.14402	-3.16561	0.0706507	0.818997	-0.116124	-0.729708	0.990102	0.577842	-0.613584	0.498112	0.999952
+pH fractionation/SP	P04053	P04053-2; P04053	AEAEAVSVLVK	[R].AEAEAVSVLVK.[E]		4.19381e-05	1	2	-0.799557		0.618992				NA	-0.341934	-4.17196		1.66191	-3.83003		NA
+pH fractionation/SP	P43403	P43403	AEAEEHLK	[R].AEAEEHLK.[L]		0.000802534	1	5	-0.523959	1.20376	0.657413	1.33115	1.72772	0.114063	0.818997	0.221408	1.47235	0.693866	0.345018	1.25094	0.0490084	0.999952
+pH fractionation/SP	Q15149	Q15149-4; Q15149; Q15149-6; Q15149-9; Q15149-3; Q15149-8; Q15149-5; Q15149-7; Q15149-2	AEAELLQQQK	[K].AEAELLQQQK.[E]		0.00654997	1	1	-5.86547	-3.28353		0.16267	2.58193		NA	-2.78258	-1.31097	0.95479	0.459387	1.47161	0.145182	0.999952
+pH fractionation/SP	Q16512-2	Q16512-2; Q16512; Q16512-3	AEAENTSEVSTVLK	[K].AEAENTSEVSTVLK.[L]		0	1	5	0.350376	-2.63751	0.104485	3.06074	-2.98789	0.166325	0.818997	0.438439	1.55691	0.786041	1.01245	1.11847	0.252963	0.999952
+pH fractionation/SP	P15498	P15498-2; P15498	AEAEQNWWEGR	[K].AEAEQNWWEGR.[N]		3.35083e-05	1	13	-2.19735	-0.621899	1.17264	1.03522	1.57545	0.223727	0.818997	-1.99019	-4.75696			-2.76677		NA
+pH fractionation/SP	Q9GZR7	Q9GZR7-2; Q9GZR7	AEAESDALPDDTVIESEALPSDIAAEAR	[K].AEAESDALPDDTVIESEALPSDIAAEAR.[A]		0	1	6	-2.05761	-3.73621	1.48466		-1.6786		NA	-2.9695						NA
+pH fractionation/SP	P04264	P04264	AEAESLYQSK	[K].AEAESLYQSK.[Y]		4.19381e-05	1	32	3.54974	-0.261422	1.60999	4.73819	-3.81116	0.257579	0.818997	2.52022	-1.11608			-3.6363		NA
+pH fractionation/SP	P04264	P04264	AEAESLYQSKYEELQITAGR	[K].AEAESLYQSKYEELQITAGR.[H]		0	1	3	-2.02908	-0.160714	0.256644	1.54161	1.86837	0.232963	0.818997	-0.759953	1.5884	1.61075	0.301506	2.34835	0.068058	0.999952
+pH fractionation/SP	P05787-2	P05787-2; P05787	AEAESMYQIK	[R].AEAESMYQIK.[Y]		0.00163859	1	1	2.68263	-0.569383	1.05613	2.49764	-3.25201	0.106369	0.818997	1.11156	-1.05344		2.03441	-2.165		NA
+pH fractionation/SP	P04259; P02538	P04259; P02538; O95678; P48668	AEAESWYQTK	[R].AEAESWYQTK.[Y]		4.19381e-05	2	10	1.23263	0.680296	0.480275	1.26743	-0.552338	0.519228	0.861893	2.08996	2.7181	1.74413	0.533948	0.628146	0.582978	0.999952
+pH fractionation/SP	P46783	P46783; Q9NQ39	AEAGAGSATEFQFR	[K].AEAGAGSATEFQFR.[G]		0	1	44	0.580341	-0.242388	0.825096	3.33888	-0.822729	0.699888	0.909786	-1.32902	-0.861702	2.51456	1.07063	0.467318	0.826679	0.999952
+pH fractionation/SP	P49411	P49411	AEAGDNLGALVR	[R].AEAGDNLGALVR.[G]		0	1	23	4.73429	4.18067	0.576749	1.14494	-0.553617	0.496059	0.857331	4.78611	4.50823	0.536055	0.90276	-0.277879	0.670453	0.999952
+pH fractionation/SP	O95671	O95671-2; O95671-3; O95671	AEAGEAGQATAEAECHR	[K].AEAGEAGQATAEAECHR.[T]	1xCarbamidomethyl [C15]	0	1	2	-2.96353	0.84198	0.243592		3.80551		NA	-2.65277	1.55026	1.69452		4.20302		NA
+pH fractionation/SP	P56182	P56182	AEAGEQPGTAER	[R].AEAGEQPGTAER.[A]		3.35083e-05	1	2	4.20812	1.01386	0.41253	3.5682	-3.19426	0.198338	0.818997	3.02576	1.69262	2.31041	3.05792	-1.33314	0.579344	0.999952
+pH fractionation/SP	Q969T9	Q969T9; Q969T9-2	AEAGGGWEGSASYK	[K].AEAGGGWEGSASYK.[L]		0	1	9	1.83764	0.499721	0.318626	0.602542	-1.33792	0.0272812	0.775648	0.938281	-0.172751	0.538126	1.2797	-1.11103	0.237954	0.999952
+pH fractionation/SP	Q9Y4L1	Q9Y4L1	AEAGPEGVAPAPEGEK	[K].AEAGPEGVAPAPEGEK.[K]		0	1	11	2.94837	0.324858	0.332112	1.07186	-2.62351	0.0154822	0.701195	1.71263	1.03171	1.78816	1.52275	-0.680926	0.641942	0.999952
+pH fractionation/SP	Q9Y4L1	Q9Y4L1	AEAGPEGVAPAPEGEKK	[K].AEAGPEGVAPAPEGEKK.[Q]		4.19381e-05	1	1	-1.1283	-2.38029	1.08987		-1.25199		NA	-0.896		1.79587				NA
+pH fractionation/SP	P21333	P21333; P21333-2	AEAGVPAEFSIWTR	[R].AEAGVPAEFSIWTR.[E]		0	1	18	2.01874	1.26772	0.430237	1.99092	-0.751021	0.557797	0.872394	-0.0827467	0.333102	1.75724	0.823518	0.415849	0.729346	0.999952
+pH fractionation/SP	Q8TC07	Q8TC07; Q8TC07-3; Q8TC07-2	AEAISLQMVK	[K].AEAISLQMVK.[C]		0.000224101	1	1	7.40444	4.04506	0.660064	2.40958	-3.35938	0.0803412	0.818997	4.56727	2.7059	1.7919	2.03785	-1.86137	0.300525	0.999952
+pH fractionation/SP	P82933	P82933	AEAIVYK	[K].AEAIVYK.[H]		0.00279079	1	5	4.27385	1.24552	0.723996	2.84518	-3.02833	0.148536	0.818997	4.23496	2.72028	1.39406	2.70665	-1.51469	0.437444	0.999952
+pH fractionation/SP	P46013; P46013-2	P46013; P46013-2	AEALEDLVGFK	[K].AEALEDLVGFK.[E]		4.19381e-05	2	8	1.22054	1.90209	0.290009	2.03458	0.681547	0.596456	0.882766	-0.407202	0.302185	1.3729	0.380763	0.709387	0.437098	0.999952
+pH fractionation/SP	Q9H583	Q9H583	AEALMMPLVDQLENR	[R].AEALMMPLVDQLENR.[L]		0	1	3	-3.58389	-1.17047	0.373859	1.56746	2.41341	0.060424	0.818997	-1.65413	-1.66827	0.0546566	1.78706	-0.0141398	0.992199	0.999952
+pH fractionation/SP	O14802	O14802	AEALVLMGTK	[K].AEALVLMGTK.[A]		0.00174248	1	2	-3.44504	-1.8719	1.36628	1.64199	1.57314	0.348766	0.824979	-3.65973	-1.08352	0.000594826		2.57621		NA
+pH fractionation/SP	Q8NC44	Q8NC44	AEANALHHK	[K].AEANALHHK.[H]		0.000169063	1	2	1.311	0.00776506	0.696202		-1.30324		NA		-2.10813					NA
+pH fractionation/SP	Q53F19	Q53F19	AEAPAGPALGLPSPEAESGVDR	[K].AEAPAGPALGLPSPEAESGVDR.[G]		0	1	2	-3.33208	-1.58265		1.35578	1.74944		NA	-0.545367	0.197013	0.745509	0.960706	0.742379	0.43041	0.999952
+pH fractionation/SP	O75569	O75569	AEAPPLER	[R].AEAPPLER.[E]		0.00980225	1	1	1.34459	1.35778	2.85191	0.603901	0.0131916	0.995488	0.998725	1.87289	0.302578	1.32177	0.486527	-1.57031	0.255572	0.999952
+pH fractionation/SP	Q8TEM1	Q8TEM1; Q8TEM1-2	AEAQGSTTLLVSYR	[K].AEAQGSTTLLVSYR.[H]		0	1	7	1.8465	0.581722	0.975097	2.58207	-1.26477	0.471796	0.851617	2.27247	1.84279	1.38417	2.95725	-0.429675	0.83088	0.999952
+pH fractionation/SP	P00505	P00505	AEAQIAAK	[K].AEAQIAAK.[N]		0.000836425	1	4	2.70068	1.60412	1.68687	1.17637	-1.09656	0.407993	0.835568	0.880678	1.50422	0.831539	0.323571	0.623539	0.292759	0.999952
+pH fractionation/SP	Q66PJ3	Q66PJ3; Q66PJ3-3; Q66PJ3-2; Q66PJ3-4; Q66PJ3-7	AEAQQVEALPGPSLDQWHR	[K].AEAQQVEALPGPSLDQWHR.[S]		0	1	3	-1.57654	-3.3253	1.51594	2.03119	-1.74877	0.298067	0.819326	-1.40968	-2.29181	1.09054	1.05688	-0.882133	0.49772	0.999952
+pH fractionation/SP	Q9BW92	Q9BW92; Q9BW92-2	AEASGGLGGLTR	[R].AEASGGLGGLTR.[L]		0.000246334	1	3	0.666228	1.35136	0.607774	1.30628	0.685131	0.456408	0.84745	2.31709	-0.0342975	0.538058	3.53996	-2.35139	0.318866	0.999952
+pH fractionation/SP	Q9Y490	Q9Y490	AEASQLGHK	[R].AEASQLGHK.[V]		0.000114852	1	11	5.71317	2.39975	0.295918	3.10906	-3.31343	0.138786	0.818997	0.638128	-3.39304	4.90664	1.2963	-4.03116	0.240893	0.999952
+pH fractionation/SP	Q02790	Q02790	AEASSGDHPTDTEMK	[K].AEASSGDHPTDTEMK.[E]		0	1	2	-1.33739	-3.9483	1.66087	0.664274	-2.61091	0.135413	0.818997		-3.31365		0.181633			NA
+pH fractionation/SP	Q02790	Q02790	AEASSGDHPTDTEMKEEQK	[K].AEASSGDHPTDTEMKEEQK.[S]		0	1	9	1.21858	0.695215	0.463494		-0.523366		NA	-2.51856		2.34603				NA
+pH fractionation/SP	Q14566	Q14566	AEAVESAQAGDK	[R].AEAVESAQAGDK.[C]		3.35083e-05	1	9	2.38355	1.28042	1.37878	1.50295	-1.10312	0.401902	0.835161	-1.14781	-0.56518	2.14403	0.544853	0.582633	0.743483	0.999952
+pH fractionation/SP	P28340	P28340	AEAVLLR	[R].AEAVLLR.[G]		0.00496653	1	2	2.19156	0.87038	0.333541	1.46713	-1.32118	0.202919	0.818997	0.367728	0.179545	0.812504	1.19002	-0.188182	0.842954	0.999952
+pH fractionation/SP	Q8IY81	Q8IY81	AEAVVNTVDISER	[K].AEAVVNTVDISER.[E]		0	1	11	0.116919	1.89896	3.03566		1.78204		NA	1.07308	2.19623	1.80032	0.867087	1.12314	0.486054	0.999952
+pH fractionation/SP	Q9BUJ2	Q9BUJ2; Q9BUJ2-2; Q9BUJ2-3; Q9BUJ2-4	AECEILMMVGLPAAGK	[K].AECEILMMVGLPAAGK.[T]	1xCarbamidomethyl [C3]	0	1	4	-0.113882	-0.991135	0.326627	1.19663	-0.877253	0.287791	0.819248	-2.365	-2.14545	2.5327	1.81658	0.219557	0.908775	0.999952
+pH fractionation/SP	P13796	P13796	AECMLQQAER	[R].AECMLQQAER.[L]	1xCarbamidomethyl [C3]	4.19381e-05	1	25	3.04596	-0.510319			-3.55628		NA	2.58415	0.0770351		0.0724763	-2.50711		NA
+pH fractionation/SP	P13796	P13796	AECMLQQAER	[R].AECMLQQAER.[L]	1xCarbamidomethyl [C3]; 1xOxidation [M4]	4.19381e-05	1	13	-1.33439	-3.52487	0.766859	3.49518	-2.19048	0.338606	0.824244	-3.7219	-6.13131			-2.40941		NA
+pH fractionation/SP	P13984	P13984	AECRPAASENYMR	[R].AECRPAASENYMR.[L]	1xCarbamidomethyl [C3]	4.19381e-05	1	2	-2.75526	0.686786	1.40982		3.44205		NA	0.390635	1.24912	2.31085	0.869672	0.858486	0.579496	0.999952
+pH fractionation/SP	Q9BQ04; Q9BWF3	Q9BQ04; Q9BWF3-4; Q9BWF3-2; RBM4_3575_I0; Q9BWF3-3; RBM4_3575_E0; Q9BWF3	AEDAVEAIR	[R].AEDAVEAIR.[G]		6.09156e-05	2	29	-1.28687	-1.46708	0.534353	0.714681	-0.180214	0.744135	0.923528	-2.52303	-2.54822	0.243675		-0.0251895		NA
+pH fractionation/SP	Q8TEW0	Q8TEW0-8; Q8TEW0-11; Q8TEW0-9; Q8TEW0-10; Q8TEW0-5; Q8TEW0-6; Q8TEW0-7; Q8TEW0-4; Q8TEW0-2; Q8TEW0; Q8TEW0-3	AEDEDIVLTPDGTR	[K].AEDEDIVLTPDGTR.[E]		0.000192563	1	1	-0.369538	-1.65323	0.203846	1.16588	-1.2837	0.133499	0.818997	-1.48841		0.382173				NA
+pH fractionation/SP	Q86V48	Q86V48-3; Q86V48; Q86V48-2	AEDELLDLQDK	[K].AEDELLDLQDK.[V]		4.19381e-05	1	3	-1.94884	-1.6369	0.583624	0.822735	0.311945	0.620606	0.889612	-1.16823	-0.915584	0.726272	0.393331	0.252643	0.624289	0.999952
+pH fractionation/SP	P04818	P04818-2; P04818; P04818-3	AEDFQIEGYNPHPTIK	[K].AEDFQIEGYNPHPTIK.[M]		0	1	15	-1.58574	-0.541762	0.93865		1.04398		NA	-6.20002						NA
+pH fractionation/SP	Q8N9Z2	Q8N9Z2-2; Q8N9Z2	AEDGAGLEAR	[R].AEDGAGLEAR.[E]		0.000177325	1	1		-1.72591		0.177519			NA	-1.29793	-2.86131	0.869761	0.368737	-1.56338	0.144121	0.999952
+pH fractionation/SP	O75347	O75347; O75347-2	AEDGENYDIK	[R].AEDGENYDIK.[K]		6.09156e-05	1	6	1.89023	0.947269	0.504372	1.09003	-0.942958	0.263259	0.818997	1.57256	1.35444	1.16561	0.387476	-0.218119	0.825161	0.999952
+pH fractionation/SP	Q03252	Q03252	AEDGHAVAK	[K].AEDGHAVAK.[K]		0.000114852	1	3	-1.74508	-0.566143	1.35635	0.934739	1.17894	0.28287	0.819124	-0.126896	0.0610823	0.900992	0.682958	0.187979	0.821052	0.999952
+pH fractionation/SP	P07355-2	P07355-2; P07355	AEDGSVIDYELIDQDAR	[R].AEDGSVIDYELIDQDAR.[D]		0	1	10	-1.05014	-1.28104	0.626533	2.0481	-0.230897	0.856906	0.960178	-0.550842	-0.176764	0.704536	0.105425	0.374077	0.529781	0.999952
+pH fractionation/SP	P49792	P49792	AEDIENDALSPEEQEECK	[K].AEDIENDALSPEEQEECK.[N]	1xCarbamidomethyl [C17]	0	1	3		-1.95023					NA	-3.16765	-2.75595	1.15683	0.889191	0.411691	0.650629	0.999952
+pH fractionation/SP	Q66K14	Q66K14; Q66K14-2	AEDIEQMR	[R].AEDIEQMR.[F]		0.000928578	1	2	2.88936	0.400347	0.357727	1.58302	-2.48901	0.0566048	0.818997	0.565454	1.03466	1.56046	0.319828	0.469204	0.71644	0.999952
+pH fractionation/SP	P15880	P15880	AEDKEWMPVTK	[K].AEDKEWMPVTK.[L]	1xOxidation [M7]	0.000114852	1	11	0.078704	0.90629	0.631128	1.98181	0.827586	0.522249	0.862487	1.31785	2.88126	2.36981	0.180168	1.56341	0.441877	0.999952
+pH fractionation/SP	P15880	P15880	AEDKEWMPVTK	[K].AEDKEWMPVTK.[L]		4.19381e-05	1	60	-0.421763	-0.489618	0.78249	0.915265	-0.0678551	0.926943	0.980612	-0.362618	-0.950187	0.784703	1.35358	-0.58757	0.550867	0.999952
+pH fractionation/SP	Q7Z4V5	Q7Z4V5-3; Q7Z4V5-2; Q7Z4V5-4; Q7Z4V5	AEDKPSTDLSAPVNGEATSQK	[K].AEDKPSTDLSAPVNGEATSQK.[G]		0	1	4	-1.48099		0.382157				NA	-3.60436	-3.53892	0.799663		0.0654386		NA
+pH fractionation/SP	Q9ULI0	Q9ULI0-2; Q9ULI0	AEDLASGILR	[R].AEDLASGILR.[E]		0.000114852	1	6	-0.702325	-1.32875		3.68129	-0.626424		NA	2.59459	2.80837	1.45278	0.591588	0.213787	0.824979	0.999952
+pH fractionation/SP	Q96SZ5	Q96SZ5	AEDLNIAPR	[R].AEDLNIAPR.[K]		0.000387362	1	3	-0.424402	-7.79179	2.06501		-7.36738		NA	-1.89912	-0.360893	2.08382	0.952621	1.53823	0.324356	0.999952
+pH fractionation/SP	Q9BSJ8	Q9BSJ8; Q9BSJ8-2	AEDLPLR	[R].AEDLPLR.[K]		0.00417713	1	5	2.19529	2.15107	0.377342		-0.0442203		NA	2.13716	-1.8075		0.252395	-3.94466		NA
+pH fractionation/SP	P12004	P12004	AEDNADTLALVFEAPNQEK	[R].AEDNADTLALVFEAPNQEK.[V]		0	1	34	-0.190093	-0.778704	0.304007	0.36527	-0.58861	0.098501	0.818997	-1.08379	-4.49971	0.202142	2.55446	-3.41592	0.0860637	0.999952
+pH fractionation/SP	Q9Y6G9	Q9Y6G9	AEDNFEDIITKPPVR	[K].AEDNFEDIITKPPVR.[K]		0	1	5	5.86972	4.9962	0.340873	1.70022	-0.873523	0.432174	0.840372	4.4664	3.68874	1.74017	0.690725	-0.777659	0.511667	0.999952
+pH fractionation/SP	Q86U86	Q86U86-5; Q86U86-7; Q86U86-4; Q86U86; Q86U86-9; Q86U86-8; Q86U86-2; Q86U86-3	AEDNFNLEK	[R].AEDNFNLEK.[E]		0.000236593	1	7	1.23685	0.144628	0.439312	1.5088	-1.09222	0.295019	0.819326	-0.137245	-0.556162	1.79913	0.445569	-0.418917	0.704749	0.999952
+pH fractionation/SP	P46013; P46013-2	P46013; P46013-2	AEDNVCVK	[K].AEDNVCVK.[K]	1xCarbamidomethyl [C6]	0.0015008	2	1	-2.24029	-4.16906	0.118301		-1.92878		NA		-4.57902					NA
+pH fractionation/SP	Q9BU76	Q9BU76	AEDQTESSCESHR	[R].AEDQTESSCESHR.[K]	1xCarbamidomethyl [C9]	3.35083e-05	1	2	0.812369	2.26561	1.06181		1.45325		NA	-0.0138435	-0.122223	2.21036	0.498668	-0.108379	0.952224	0.999952
+pH fractionation/SP	Q8IXQ5	Q8IXQ5-5; Q8IXQ5; Q8IXQ5-2	AEDQVYDAAVR	[R].AEDQVYDAAVR.[W]		4.19381e-05	1	2	0.155493	-1.22563	2.72054	2.35136	-1.38113	0.601913	0.884783	-2.12198	-5.07515	3.1699	2.12028	-2.95317	0.387739	0.999952
+pH fractionation/SP	Q9Y639	Q9Y639-4; Q9Y639; Q9Y639-5; Q9Y639-1; Q9Y639-3	AEDSGEYHCVYHFVSAPK	[R].AEDSGEYHCVYHFVSAPK.[A]	1xCarbamidomethyl [C9]	0	1	5	-0.509455	-0.101591	0.0561076	0.907028	0.407864	0.589209	0.880925	0.199892	0.870318	1.15781	0.0926159	0.670426	0.374009	0.999952
+pH fractionation/SP	Q7Z5K2-3	Q7Z5K2-3; Q7Z5K2-2; Q7Z5K2	AEDSICLADSKPLPHQNVTNHVGK	[R].AEDSICLADSKPLPHQNVTNHVGK.[A]	1xCarbamidomethyl [C6]	0	1	2		-4.02128					NA	-3.98735	-1.80104	1.35634	0.338737	2.18631	0.157512	0.999952
+pH fractionation/SP	Q8WUH1	Q8WUH1-2; Q8WUH1; CHURC1_367_I0	AEDTISILPDDPR	[K].AEDTISILPDDPR.[Q]		4.19381e-05	1	14	0.455362	0.108039	0.937208	2.24224	-0.347324	0.816676	0.947051	-1.45746	-2.48913	1.16516	1.74205	-1.03166	0.524483	0.999952
+pH fractionation/SP	Q02241	Q02241-2; Q02241-3; Q02241	AEDYEENLQVMR	[K].AEDYEENLQVMR.[F]		3.35083e-05	1	5	-1.24154	-0.0300927	0.618747	3.22098	1.21145	0.65352	0.898702	1.07289	3.01286	2.09815	0.292917	1.93997	0.304899	0.999952
+pH fractionation/SP	Q13464	Q13464	AEDYEVVK	[K].AEDYEVVK.[V]		0.000420983	1	2	-1.33086	-0.815964	0.686438		0.514901		NA	-1.7104	-1.80386	1.40841	0.261969	-0.0934628	0.935223	0.999952
+pH fractionation/SP	Q9UKW4-4	Q9UKW4-4; Q9UKW4; Q9UKW4-2	AEEAHQPK	[K].AEEAHQPK.[C]		0.00232056	1	1	-3.64328	-0.869527	0.258835	0.852413	2.77375	0.0478996	0.818997	-1.82192	-0.900599	2.02865	0.601785	0.921319	0.492731	0.999952
+pH fractionation/SP	Q92619-2	Q92619; Q92619-2	AEEAMATYR	[K].AEEAMATYR.[T]		0.000877399	1	2	0.458123	-0.321548	0.155273	0.638816	-0.779671	0.116259	0.818997	-0.345454	0.373056	1.71739	0.471537	0.71851	0.523185	0.999952
+pH fractionation/SP	Q13428-3; Q13428-7	Q13428-5; Q13428-3; Q13428-4; Q13428-7; Q13428-6; Q13428-8; Q13428-2; Q13428	AEEDAALQAK	[K].AEEDAALQAK.[K]		4.19381e-05	2	4	1.07857	-1.76445	0.333679	0.97171	-2.84302	0.0154465	0.701195	-1.07648	-0.406322	2.94473	0.937016	0.670163	0.78523	0.999952
+pH fractionation/SP	P27824-2	P27824-2; P27824-3; P27824	AEEDEILNR	[K].AEEDEILNR.[S]		9.74898e-05	1	16	-2.26593	-1.6374	0.165769		0.628536		NA	-2.42476	-1.04397	0.248148	1.20914	1.38079	0.254465	0.999952
+pH fractionation/SP	Q14683	Q14683	AEEDTQFNYHR	[K].AEEDTQFNYHR.[K]		4.19381e-05	1	10	0.264163	-0.295509	0.101407	0.899896	-0.559673	0.328119	0.822014	-2.2359	-1.58493	3.15044	2.41985	0.650977	0.790626	0.999952
+pH fractionation/SP	Q9UJU6	Q9UJU6-2; Q9UJU6; Q9UJU6-5; Q9UJU6-3; Q9UJU6-4	AEEDVEPECIMEK	[R].AEEDVEPECIMEK.[V]	1xCarbamidomethyl [C9]	0	1	7	1.75188	-0.079861	1.58894	2.31457	-1.83174	0.321617	0.820259	-1.4599	-2.08794	2.98092	0.782898	-0.628035	0.732781	0.999952
+pH fractionation/SP	P36543	P36543; P36543-3; Q96A05	AEEEFNIEK	[K].AEEEFNIEK.[G]		0.000169063	1	6	-0.145476	-5.11105	0.146143	0.259773	-4.96558	9.60345e-05	0.416811	-4.64291	-4.23932	1.40844	2.29974	0.403589	0.808264	0.999952
+pH fractionation/SP	O00425	O00425	AEEEIMK	[K].AEEEIMK.[K]		0.00417713	1	3		1.18511					NA	0.592582	-0.447512	0.918688	0.52463	-1.04009	0.193281	0.999952
+pH fractionation/SP	Q9UQE7	Q9UQE7	AEEELGELEAK	[K].AEEELGELEAK.[L]		4.19381e-05	1	5	-2.16216	-2.21117	0.812766	0.943347	-0.0490106	0.954068	0.986566	-2.1199	-1.71139	1.5247	0.209319	0.408508	0.744199	0.999952
+pH fractionation/SP	Q8N0X7	Q8N0X7	AEEENEFQIPGR	[R].AEEENEFQIPGR.[T]		0	1	10	3.01179	0.0402783	0.499889	0.303875	-2.97151	0.0052519	0.592278	0.603947	-1.6257	1.91443	4.59575	-2.22965	0.481234	0.999952
+pH fractionation/SP	Q8N3C0	Q8N3C0	AEEFDQIK	[K].AEEFDQIK.[V]		0.00295288	1	2	0.790362	0.198183	0.648593	2.69205	-0.592178	0.719208	0.91552	-0.730851	-0.62664	2.12943	0.649778	0.104211	0.952863	0.999952
+pH fractionation/SP	Q9UBB9	Q9UBB9-2; Q9UBB9	AEEHNIVFMPVIGK	[K].AEEHNIVFMPVIGK.[R]		0.00073701	1	4	1.93532	0.97417	0.501027	0.66005	-0.961153	0.114935	0.818997	-1.76354	-0.0371108	2.96094	1.1733	1.72643	0.50602	0.999952
+pH fractionation/SP	P49588	P49588; P49588-2	AEEIANEMIEAAK	[K].AEEIANEMIEAAK.[A]		3.35083e-05	1	12	1.41435	0.68448	0.496831	0.81097	-0.729872	0.254519	0.818997	-0.39109	-0.334235	0.924767	0.293575	0.0568547	0.924042	0.999952
+pH fractionation/SP	A2RRP1	A2RRP1-2; A2RRP1	AEEIEHYAR	[R].AEEIEHYAR.[Q]		4.19381e-05	1	2	1.33019						NA	1.72287	2.67076	1.68692	0.0559531	0.947894	0.505804	0.999952
+pH fractionation/SP	P62913	P62913-2; P62913	AEEILEK	[K].AEEILEK.[G]		0.00132236	1	20	2.69703	1.26096	0.0445351	1.80031	-1.43607	0.239363	0.818997	1.51983	1.70335	2.29067	1.42399	0.183516	0.911869	0.999952
+pH fractionation/SP	Q8IXI1	Q8IXI1	AEEITIPADVTPEK	[R].AEEITIPADVTPEK.[V]		4.19381e-05	1	3	0.839002	-1.66673	0.0817884	0.274864	-2.50573	0.000536609	0.436786	-0.960585	-3.41388			-2.4533		NA
+pH fractionation/SP	P17480-2; P17480	P17480-2; P17480	AEEIWQQSVIGDYLAR	[R].AEEIWQQSVIGDYLAR.[F]		0	2	12	-2.45408	-1.69206	0.568988	1.9445	0.76202	0.550291	0.870404	-1.88269	-0.128327	3.44102	0.650886	1.75436	0.434524	0.999952
+pH fractionation/SP	Q9UEE9	Q9UEE9-2; Q9UEE9	AEELEKPK	[K].AEELEKPK.[E]		0.000711679	1	4	0.131375	-0.538991	0.446403	1.51704	-0.670366	0.495292	0.856885	-1.38739	-1.4716	2.18519	0.858064	-0.0842039	0.963402	0.999952
+pH fractionation/SP	Q86TU7	Q86TU7-3; Q86TU7; SETD3_2871_E0; SETD3_2871_I2; Q86TU7-2	AEELFLWVPR	[K].AEELFLWVPR.[K]		4.19381e-05	1	10	-4.95794	-1.03538	0.279567	5.74961	3.92256	0.287069	0.819124	0.167328	1.46555	3.82005	0.479013	1.29822	0.680553	0.999952
+pH fractionation/SP	P09110	P09110	AEELGLPILGVLR	[K].AEELGLPILGVLR.[S]		4.19381e-05	1	10	-0.631781	0.674703	0.617927	0.220699	1.30648	0.0707255	0.818997	0.26458	-1.89549			-2.16007		NA
+pH fractionation/SP	Q14980-2; Q14980	NUMA1_2515_I0; Q14980-3; Q14980-2; Q14980-4; Q14980; NUMA1_2515_E0	AEELGQELK	[R].AEELGQELK.[A]		0.000246334	2	10	1.8607	2.5117	0.718698	0.23041	0.651005	0.209477	0.818997	2.3778	2.49676	1.44072	0.473226	0.118959	0.898486	0.999952
+pH fractionation/SP	Q14257-2	Q14257-2; Q14257	AEELHYPLGER	[K].AEELHYPLGER.[R]		4.19381e-05	1	13	1.46582	1.34756	1.23257	4.2759	-0.118262	0.965492	0.990137	4.02476	5.32435	3.07118	1.91089	1.29959	0.567461	0.999952
+pH fractionation/SP	O00429	O00429-4; O00429; O00429-6; O00429-8; O00429-7; DNM1L_2180_I0; DNM1L_2180_E0; O00429-3; O00429-5; O00429-2	AEELLAEEK	[K].AEELLAEEK.[S]		0.000246334	1	4							NA	-1.4648	-1.20016	1.04881	1.21537	0.264638	0.819171	0.999952
+pH fractionation/SP	P55212	P55212; Q04844	AEELLLK	[KR].AEELLLK.[IK]		0.00133186	1	24	-1.43734	-0.121755	0.86888	2.09511	1.31559	0.379705	0.831052	0.212026	1.21083	2.41957	0.185231	0.998807	0.515283	0.999952
+pH fractionation/SP	P62993	GRB2_1736_I0; P62993	AEEMLSK	[K].AEEMLSK.[Q]		0.00715608	1	3	0.515644	2.65967	1.4308	1.0025	2.14403	0.100703	0.818997	1.27677	1.54107	0.891572	1.08812	0.264298	0.761175	0.999952
+pH fractionation/SP	Q8N5F7	Q8N5F7	AEEPSDLIGPEAPK	[K].AEEPSDLIGPEAPK.[T]		3.35083e-05	1	5	-3.46765	-2.11201	0.106765	0.332233	1.35563	0.0315717	0.79254		-3.24798					NA
+pH fractionation/SP	Q96EZ8-2	Q96EZ8-3; Q96EZ8-4; Q96EZ8-2; Q96EZ8	AEEQLLSK	[K].AEEQLLSK.[V]		0.000605261	1	3	-1.05692	-1.55763	0.947886	1.28862	-0.500716	0.616509	0.888566	-1.17711	-1.98757	0.173776	0.730156	-0.810463	0.134782	0.999952
+pH fractionation/SP	Q14152	Q14152; Q14152-2	AEEQMLK	[R].AEEQMLK.[E]		0.00613457	1	3	0.585018	-1.96856	0.0331306	1.71176	-2.55358	0.06111	0.818997	-0.486131	-0.0849048	2.89443	1.89883	0.401226	0.850686	0.999952
+pH fractionation/SP	P11387	P11387	AEEVATFFAK	[K].AEEVATFFAK.[M]		4.19381e-05	1	22	-3.04758	-2.40368	1.21038	1.49899	0.643893	0.651153	0.897925	-1.10898	-0.878356	0.501197	0.677855	0.230627	0.660319	0.999952
+pH fractionation/SP	Q8NBN3	Q8NBN3-2; Q8NBN3-3; Q8NBN3	AEEVELYLEK	[K].AEEVELYLEK.[L]		4.19381e-05	1	1	-1.85722	-4.19195	0.504187		-2.33473		NA	-3.62271	-3.67666	2.10693	0.0918249	-0.0539481	0.974766	0.999952
+pH fractionation/SP	Q9BWH2	Q9BWH2	AEEVVSFVK	[K].AEEVVSFVK.[K]		0.000177325	1	6	0.763849	-0.203631	0.62614	1.21724	-0.96748	0.28805	0.819326	-1.15527	-2.09289	3.49053	0.475221	-0.937618	0.742793	0.999952
+pH fractionation/SP	P11234-2	P11234-2; P11234; P11234-3	AEEWGVQYVETSAK	[K].AEEWGVQYVETSAK.[T]		0	1	1	-2.81711	-2.84509		0.651815	-0.0279742		NA	-0.346341						NA
+pH fractionation/SP	P52565	P52565	AEEYEFLTPVEEAPK	[R].AEEYEFLTPVEEAPK.[G]		0	1	27	-0.367787	-0.00486257	0.395992	1.56923	0.362925	0.717504	0.914994	1.22993	1.77241	1.51795	1.06336	0.542478	0.638845	0.999952
+pH fractionation/SP	Q9Y2W1	Q9Y2W1	AEEYTEETEER	[K].AEEYTEETEER.[E]		4.19381e-05	1	6	1.76535	0.976785	0.676496	2.50228	-0.788569	0.615474	0.888244	-1.24253	-2.03237	4.43894	1.1444	-0.789842	0.771897	0.999952
+pH fractionation/SP	Q9Y2W1	Q9Y2W1	AEEYTEETEEREESTTGFDK	[K].AEEYTEETEEREESTTGFDK.[S]		0	1	3	-1.68915	-1.0027	0.581119	3.59069	0.686444	0.814556	0.946549	0.37197	1.75537	2.61873	0.340665	1.3834	0.41554	0.999952
+pH fractionation/SP	Q96B26	Q96B26	AEFAAPSTDAPDK	[K].AEFAAPSTDAPDK.[G]		4.19381e-05	1	7	-3.4078	-1.17147	0.267053	3.17105	2.23633	0.414596	0.837981	2.95799	2.90842	0.0655821	0.314235	-0.0495737	0.847557	0.999952
+pH fractionation/SP	P02768	P02768; P02768-2	AEFAEVSK	[K].AEFAEVSK.[L]		0.000874531	1	11	1.89251	1.41357	0.259043	0.393283	-0.478944	0.152944	0.818997	2.25241	1.22363	0.807972	1.24882	-1.02877	0.297054	0.999952
+pH fractionation/SP	Q14692	Q14692	AEFEDQDDEAR	[R].AEFEDQDDEAR.[V]		4.19381e-05	1	3		-2.21949		1.0824			NA	-3.18906	-2.13528			1.05378		NA
+pH fractionation/SP	Q9UFW8	Q9UFW8	AEFEEQNVR	[K].AEFEEQNVR.[K]		0.000236593	1	5	-1.71074	-0.313089	0.439832	0.821318	1.39765	0.0822122	0.818997	-0.876724						NA
+pH fractionation/SP	Q9UHY7	Q9UHY7	AEFFADVVPAVR	[K].AEFFADVVPAVR.[K]		3.35083e-05	1	14	1.07906	-1.17737	0.219815	0.84159	-2.25643	0.066927	0.818997		-0.210308		1.24445			NA
+pH fractionation/SP	O95487-3	O95487-2; O95487; O95487-3	AEFFQHLIEDR	[K].AEFFQHLIEDR.[T]		4.19381e-05	1	3	-1.20657	-3.02169	0.320023	1.0742	-1.81511	0.0598069	0.818997	-4.81599	-3.62257			1.19342		NA
+pH fractionation/SP	Q8IWS0	Q8IWS0-2; Q8IWS0-4; Q8IWS0; Q8IWS0-3; Q8IWS0-5	AEFGDFDIK	[R].AEFGDFDIK.[T]		0.000246334	1	22	-1.55175	-0.699364	0.955079	0.576956	0.85239	0.256356	0.818997	0.32654	0.256371	1.24326	0.135869	-0.0701688	0.943983	0.999952
+pH fractionation/SP	Q9H4A4	Q9H4A4	AEFGPPGPGAGSR	[R].AEFGPPGPGAGSR.[G]		4.19381e-05	1	13	1.92255	0.62069	1.13748	0.304828	-1.30186	0.258393	0.818997	-0.859409	-3.13751	4.29008	0.939842	-2.2781	0.539546	0.999952
+pH fractionation/SP	P49848-3	P49848-3; P49848; P49848-2	AEFGSLGPLLCSQVVK	[R].AEFGSLGPLLCSQVVK.[A]	1xCarbamidomethyl [C11]	0	1	2	-2.85002	0.11013			2.96015		NA	-2.13426	-0.0941044	1.42735	0.723019	2.04016	0.168776	0.999952
+pH fractionation/SP	P48729	P48729-3; P48729; P48729-2	AEFIVGGK	[K].AEFIVGGK.[Y]		0.000660158	1	10	-5.38125	-2.07094	1.42915	5.44327	3.31031	0.358573	0.828253	0.620854	0.124313	1.3358	1.07743	-0.496541	0.722068	0.999952
+pH fractionation/SP	Q7Z5R6	Q7Z5R6; Q7Z5R6-2	AEFNYSVGFK	[R].AEFNYSVGFK.[D]		0.000177325	1	2	-1.00232	-3.60686		2.07469	-2.60454		NA	-1.60207	-1.22019	1.81178	0.0630349	0.381875	0.795793	0.999952
+pH fractionation/SP	Q8N6S5	Q8N6S5	AEFSAGAWSEPR	[R].AEFSAGAWSEPR.[K]		0.000152083	1	4		-0.88794		1.57665			NA	1.9536	-2.01407		2.58872	-3.96767		NA
+pH fractionation/SP	Q6UN15-3; Q6UN15	Q6UN15-4; Q6UN15-5; Q6UN15-3; FIP1L1_3646_I0; Q6UN15; FIP1L1_2436_I2; FIP1L1_2436_E2; FIP1L1_3646_E0	AEFTSPPSLFK	[K].AEFTSPPSLFK.[T]		4.19381e-05	2	17	-1.47314	-0.689047		1.71952	0.784092		NA							NA
+pH fractionation/SP	P21333	P21333; P21333-2	AEFTVETR	[R].AEFTVETR.[S]		0.000553704	1	19	-3.19266	-3.54555	2.38118	1.64058	-0.35288	0.86953	0.963833	-1.50022		0.177697				NA
+pH fractionation/SP	Q9UBB4	Q9UBB4-2; Q9UBB4	AEGDISNVANGFK	[R].AEGDISNVANGFK.[S]		3.35083e-05	1	4	1.1843	0.26825	0.422602	1.22104	-0.916054	0.286778	0.819124	-0.653002	-0.842104	2.68771	0.125704	-0.189102	0.929892	0.999952
+pH fractionation/SP	Q92925	Q92925; Q92925-3; Q92925-2	AEGDSAGTAGTPGGTPAGDK	[K].AEGDSAGTAGTPGGTPAGDK.[V]		0.000114852	1	1		-2.84491		3.43089			NA	-0.671336						NA
+pH fractionation/SP	Q9NYF8-3; Q9NYF8	Q9NYF8-3; Q9NYF8-4; Q9NYF8; Q9NYF8-2	AEGEPQEESPLK	[K].AEGEPQEESPLK.[S]		0.000246334	2	2		-0.0194303					NA	-0.736175	1.1665	1.69141	0.342505	1.90268	0.232032	0.999952
+pH fractionation/SP	Q9NYF8-3; Q9NYF8	Q9NYF8-3; Q9NYF8; Q9NYF8-2	AEGEWEDQEALDYFSDK	[R].AEGEWEDQEALDYFSDK.[E]		0	2	8	3.40135	2.65057	0.5791	1.83208	-0.750779	0.535661	0.866552	2.00994	0.470353	1.96486	0.769869	-1.53959	0.274991	0.999952
+pH fractionation/SP	Q96I24	Q96I24; FUBP3_1027_E0; FUBP3_1027_I0	AEGFVDALHR	[K].AEGFVDALHR.[V]		4.19381e-05	1	45	-0.663293	-0.852032	0.327708	0.974797	-0.188739	0.819489	0.947803	-1.95047	-1.93725	1.54805	0.323965	0.0132138	0.991646	0.999952
+pH fractionation/SP	P78559-2	P78559-2; P78559	AEGFYQK	[K].AEGFYQK.[H]		0.00839135	1	1	1.19757	0.676108	0.546853	2.18785	-0.521459	0.698582	0.909628	-3.69081	-1.40828	3.42312	2.1447	2.28254	0.413535	0.999952
+pH fractionation/SP	Q10570	Q10570	AEGGGAEEGAGAR	[K].AEGGGAEEGAGAR.[G]		4.19381e-05	1	3	-2.31037	-1.98843	0.75176		0.321937		NA	-3.22316	-6.49513	2.07146		-3.27197		NA
+pH fractionation/SP	P51608-2	P51608-2; P51608	AEGGGATTSTQVMVIK	[K].AEGGGATTSTQVMVIK.[R]		0	1	4		-5.45114					NA	-2.50161	-2.70562	1.6327	3.11815	-0.204011	0.924863	0.999952
+pH fractionation/SP	Q00839	Q00839	AEGGGGGGRPGAPAAGDGK	[K].AEGGGGGGRPGAPAAGDGK.[T]		0	1	12	-0.798167	-1.63834	1.81802	2.84907	-0.840178	0.758748	0.927957	-0.541278	-0.671445	0.989492	0.714837	-0.130167	0.862454	0.999952
+pH fractionation/SP	Q8NI27	Q8NI27	AEGGYFGQIR	[K].AEGGYFGQIR.[N]		4.19381e-05	1	17	-2.28806	-0.325447	1.23768	0.385765	1.96261	0.129298	0.818997	-0.353428	-1.67569	1.06386	1.35958	-1.32226	0.2553	0.999952
+pH fractionation/SP	P18433	P18433; P18433-6	AEGILDVFQTVK	[K].AEGILDVFQTVK.[S]		4.19381e-05	1	4	-0.932478	-0.391829	0.343093	0.695368	0.540649	0.312991	0.820259	-3.01638	-2.75433	2.19665	0.435754	0.262047	0.841465	0.999952
+pH fractionation/SP	Q8NHQ9	Q8NHQ9	AEGLDLASCVR	[K].AEGLDLASCVR.[S]	1xCarbamidomethyl [C9]	0.000177325	1	2		1.66471					NA	-1.08097	1.22062	4.67665	0.328496	2.3016	0.559307	0.999952
+pH fractionation/SP	Q9BX68	Q9BX68	AEGLGDGYR	[K].AEGLGDGYR.[L]		0.000177325	1	6	-0.163313	-1.71325	0.514366	1.59888	-1.54993	0.192692	0.818997	-3.56467	-3.57044	2.38952	0.938361	-0.00576696	0.997754	0.999952
+pH fractionation/SP	Q9NRG4	HSKM-B_5196_E0; HSKM-B_5196_I0; Q9NRG4-2; Q9NRG4	AEGLGGLER	[R].AEGLGGLER.[F]		0.000224101	1	8	3.07383	1.73882	0.379374	0.925227	-1.33501	0.0986531	0.818997	1.01071	0.848622	1.75596	0.171266	-0.162083	0.909487	0.999952
+pH fractionation/SP	P23469	P23469; P23469-2; P23469-3	AEGLLDVFQAVK	[K].AEGLLDVFQAVK.[S]		3.35083e-05	1	4	-3.73962	-2.32893		3.1739	1.41069		NA	-2.38856	-0.824542	0.716832	1.3621	1.56402	0.178838	0.999952
+pH fractionation/SP	Q5JPE7	Q5JPE7; Q5JPE7-2; Q5JPE7-3; Q15155; P69849	AEGNDHIER	[K].AEGNDHIER.[A]		4.19381e-05	1	7	-4.49843	0.0940826	1.90834		4.59251		NA	-0.664944	0.730306	1.48636	0.96741	1.39525	0.335613	0.999952
+pH fractionation/SP	P21333	P21333; P21333-2	AEGPGLSR	[K].AEGPGLSR.[T]		0.000877399	1	10	0.206195	-0.371688	1.7144	2.56	-0.577882	0.776177	0.933248	-0.199037	1.75386	2.81937	0.21396	1.9529	0.421867	0.999952
+pH fractionation/SP	P14735	P14735	AEGPQEWVFQECK	[R].AEGPQEWVFQECK.[D]	1xCarbamidomethyl [C12]	3.35083e-05	1	5	1.81672	0.855577	0.327977	1.6332	-0.961143	0.374175	0.829794	-0.931396	-1.43473	2.74075	1.5774	-0.50333	0.796445	0.999952
+pH fractionation/SP	P14618-2; P14618	P14618-2; P14618-3; P14618	AEGSDVANAVLDGADCIMLSGETAK	[R].AEGSDVANAVLDGADCIMLSGETAK.[G]	1xCarbamidomethyl [C16]; 1xOxidation [M18]	0	2	6	3.07325	4.04549	0.318159	0.918486	0.972239	0.158234	0.818997	4.30988	4.12779	1.62058	0.731171	-0.182086	0.867821	0.999952
+pH fractionation/SP	P14618-2; P14618	P14618-2; P14618-3; P14618	AEGSDVANAVLDGADCIMLSGETAK	[R].AEGSDVANAVLDGADCIMLSGETAK.[G]	1xCarbamidomethyl [C16]	0	2	39	0.100136	1.1994	0.101717	1.26922	1.09927	0.209151	0.818997	0.957583	1.85932	1.22544	0.974387	0.901734	0.374933	0.999952
+pH fractionation/SP	Q9NUQ8	Q9NUQ8; Q9NUQ8-2	AEGSEAAELAEIYAK	[R].AEGSEAAELAEIYAK.[L]		0	1	2	1.4145	-1.70244	0.555593	3.86764	-3.11694	0.230948	0.818997	1.34089	-0.871414			-2.2123		NA
+pH fractionation/SP	P07237	P07237	AEGSEIR	[K].AEGSEIR.[L]		0.00311592	1	2	1.15173	0.473447	1.23514		-0.678285		NA	-0.172712	0.127202	1.12568	0.258039	0.299914	0.747539	0.999952
+pH fractionation/SP	Q8WUM4	Q8WUM4-2; Q8WUM4	AEGTNFR	[R].AEGTNFR.[T]		0.0069291	1	5	-0.793952	-2.93026	1.05606	0.485883	-2.13631	0.121622	0.818997	-1.14709		0.821256				NA
+pH fractionation/SP	Q86WX3	Q86WX3	AEGTVFTEEDFQK	[K].AEGTVFTEEDFQK.[F]		3.35083e-05	1	2	-1.39535	-1.39781		1.65072	-0.00246138		NA							NA
+pH fractionation/SP	P29590	P29590; P29590-11	AEGVSTPLAGR	[R].AEGVSTPLAGR.[G]		0.00264388	1	4	-1.19134	-2.81726	0.365849	1.06104	-1.62592	0.139678	0.818997	-2.66099	-2.49369	0.614072	0.363258	0.167298	0.771707	0.999952
+pH fractionation/SP	Q8IY81	Q8IY81	AEGYAEGDLTLYHR	[K].AEGYAEGDLTLYHR.[T]		0	1	12	5.47814	4.68708	0.995961	1.20979	-0.791067	0.431268	0.840255	5.4399	5.12041	1.27969	0.572348	-0.319491	0.713175	0.999952
+pH fractionation/SP	P53041	P53041	AEGYEVAHGGR	[K].AEGYEVAHGGR.[C]		3.35083e-05	1	10	0.247218	-1.07022	0.912565	0.670619	-1.31744	0.184165	0.818997	-0.479126	-0.525935			-0.0468092		NA
+pH fractionation/SP	Q5T4S7-2	Q5T4S7-5; Q5T4S7-3; Q5T4S7-2; Q5T4S7; Q5T4S7-4	AEHASSLLELASTTK	[K].AEHASSLLELASTTK.[C]		0	1	8	5.19871	5.97313	0.717779	2.74483	0.774422	0.661012	0.89996	7.4669	8.90438	3.1589	0.432636	1.43748	0.478496	0.999952
+pH fractionation/SP	P20700	P20700	AEHDQLLLNYAK	[K].AEHDQLLLNYAK.[K]		0	1	49	-0.721275	-0.607166	1.40532	1.10996	0.114108	0.930224	0.981143	-2.88767	-3.96425	0.784631		-1.07657		NA
+pH fractionation/SP	P20700	P20700	AEHDQLLLNYAKK	[K].AEHDQLLLNYAKK.[E]		4.19381e-05	1	2	-0.86231	-7.77642	0.137369		-6.91411		NA	-0.561576	-4.28342			-3.72184		NA
+pH fractionation/SP	P26639-2	P26639; P26639-2	AEHDSILAEK	[K].AEHDSILAEK.[A]		4.19381e-05	1	15	-0.718105	-2.8169	0.206437	1.19324	-2.0988	0.0477905	0.818997	-2.98181	-3.80146	1.62662	1.81656	-0.819643	0.591662	0.999952
+pH fractionation/SP	Q96HC4-6	Q96HC4; Q96HC4-7; Q96HC4-4; Q96HC4-6	AEHIPAGK	[R].AEHIPAGK.[R]		0.00766079	1	1	1.65205	0.024342	0.182678	0.882345	-1.62771	0.0352241	0.809665	-0.17363	-0.666565	1.239	1.07249	-0.492935	0.62987	0.999952
+pH fractionation/SP	Q9Y520-7	Q9Y520-6; Q9Y520-2; Q9Y520; Q9Y520-3; Q9Y520-4; Q9Y520-7; Q9Y520-5	AEHIPSGPLR	[R].AEHIPSGPLR.[Q]		0.00376437	1	4	0.515746	0.913481	0.47539	0.987609	0.397735	0.572463	0.876168	-0.0702401	0.627936	1.05136	0.179717	0.698176	0.441564	0.999952
+pH fractionation/SP	O95394-4	O95394; O95394-3; O95394-4	AEHLDHVMFR	[K].AEHLDHVMFR.[M]		4.19381e-05	1	2	-2.26266	-0.60488	0.223478	2.80649	1.65778	0.486586	0.854971	0.563551	2.57593	3.1013	0.238254	2.01238	0.325193	0.999952
+pH fractionation/SP	P51692	STAT5A_2630_I1; P51692; P42229-2; STAT5A_2630_E1; P42229	AEHQVGEDGFLLK	[K].AEHQVGEDGFLLK.[I]		4.19381e-05	1	14	-1.28322	0.298891	3.60579	2.47839	1.58211	0.565086	0.874859	0.00527701	0.596831	4.38066	3.86743	0.591554	0.869332	0.999952
+pH fractionation/SP	Q6UB35	Q6UB35	AEIDLVCELAK	[R].AEIDLVCELAK.[R]	1xCarbamidomethyl [C7]	4.19381e-05	1	5	0.322353	-0.178972	0.422678	3.56739	-0.501325	0.809599	0.944455	0.882799	2.91178	1.68076	0.792819	2.02898	0.131588	0.999952
+pH fractionation/SP	P09525	P09525-2; P09525	AEIDMLDIR	[R].AEIDMLDIR.[A]		0.000236593	1	8	1.41289	1.86794	0.0681432	0.924591	0.455052	0.443135	0.843757	2.90952	3.07838	1.25037	0.498509	0.168864	0.838621	0.999952
+pH fractionation/SP	Q16254	Q16254	AEIEELQQR	[K].AEIEELQQR.[E]		0.000346548	1	2	0.805095	-1.8141	0.627823	2.55997	-2.61919	0.160341	0.818997	0.165839	-3.83705	1.59637	3.43024	-4.00289	0.161505	0.999952
+pH fractionation/SP	Q86U86	Q86U86-5; Q86U86-7; Q86U86-4; Q86U86; Q86U86-6; Q86U86-9; PBRM1_1964_I0; Q86U86-8; PBRM1_1964_E0; Q86U86-2; Q86U86-3	AEIEHHEMAK	[K].AEIEHHEMAK.[S]		4.19381e-05	1	10	-1.11358	-4.37261		3.11814	-3.25903		NA		-5.42416		1.45379			NA
+pH fractionation/SP	Q99805	Q99805	AEIELFVNR	[K].AEIELFVNR.[L]		0.000224101	1	2		1.44679		2.20864			NA	-1.04179	0.174696	0.321115	0.025284	1.21649	0.0333139	0.999952
+pH fractionation/SP	P14151-2	P14151; P14151-2	AEIEYLEK	[K].AEIEYLEK.[T]		0.000246334	1	6	-0.990867	1.5096	1.44458		2.50046		NA	0.813647	-1.47794	2.16739	4.4763	-2.29159	0.469526	0.999952
+pH fractionation/SP	P16615; Q93084-5	Q93084-6; Q93084; Q93084-4; P16615-3; P16615-2; P16615; Q93084-3; Q93084-2; O14983; Q93084-7; O14983-2; Q93084-5; P16615-4; O14983-3; P16615-5	AEIGIAMGSGTAVAK	[K].AEIGIAMGSGTAVAK.[ST]		0	2	14	-1.37962	-1.40556	1.47653	3.56675	-0.0259427	0.99127	0.997559	2.00351	0.698453	0.843691	1.84977	-1.30506	0.328534	0.999952
+pH fractionation/SP	Q13151	Q13151	AEIIADK	[K].AEIIADK.[Q]		0.0021851	1	13	2.351	1.41843	1.84608	3.38737	-0.932571	0.696937	0.909224	1.35121	0.102731	0.669647	2.20892	-1.24848	0.401876	0.999952
+pH fractionation/SP	P54886	P54886; P54886-2	AEIIHHLADLLTDQR	[R].AEIIHHLADLLTDQR.[D]		0.000542627	1	4	0.18943	-0.169673	1.20072	0.577801	-0.359103	0.664949	0.901323		-0.341485					NA
+pH fractionation/SP	P54886	P54886; P54886-2	AEIIHHLADLLTDQRDEILLANKK	[R].AEIIHHLADLLTDQRDEILLANKK.[D]		0	1	1		0.0249416					NA	-1.72564	1.04365	5.36712	0.0455519	2.7693	0.541479	0.999952
+pH fractionation/SP	Q9BXP5	Q9BXP5-4; Q9BXP5-5; Q9BXP5-3; Q9BXP5; Q9BXP5-2	AEIISLCK	[R].AEIISLCK.[R]	1xCarbamidomethyl [C7]	0.00210486	1	2	1.13471	0.374754	0.171968	0.433568	-0.759959	0.0477279	0.818997	-0.27402	-2.06496	1.68781	4.12419	-1.79094	0.524689	0.999952
+pH fractionation/SP	Q9BRG1	Q9BRG1	AEIITVSDGR	[K].AEIITVSDGR.[G]		0.000177325	1	5	-4.02471	-3.41145	2.16894		0.613254		NA	-1.66861						NA
+pH fractionation/SP	Q15276	Q15276; Q15276-2	AEILFLK	[K].AEILFLK.[E]		0.000877399	1	2	2.85965	0.743809	0.605556	2.29484	-2.11585	0.19975	0.818997	0.252457	-0.267522	2.04386	0.11977	-0.519979	0.755566	0.999952
+pH fractionation/SP	O94768	O94768	AEILHEIAVLELAK	[R].AEILHEIAVLELAK.[S]		0	1	1	-2.40534	0.680796	3.94289	4.84749	3.08614	0.55717	0.872318	0.524125	1.01959	2.57575	1.46383	0.495462	0.786469	0.999952
+pH fractionation/SP	Q8ND24	Q8ND24; Q8ND24-2	AEILSLESR	[K].AEILSLESR.[K]		0.000420983	1	4	2.19541	2.64493	0.361657	0.993617	0.44952	0.502377	0.858654	3.25646	3.47148	1.19399	0.47899	0.215022	0.786588	0.999952
+pH fractionation/SP	P33991	P33991	AEINILLCGDPGTSK	[R].AEINILLCGDPGTSK.[S]	1xCarbamidomethyl [C8]	3.35083e-05	1	10	1.3604	0.469508	1.02643	0.784911	-0.890895	0.381067	0.831052	1.54708	-1.16186			-2.70894		NA
+pH fractionation/SP	Q96SB4	SRPK1_1029_I2; Q96SB4-4; Q96SB4-3; Q96SB4	AEIPCEDEQEQEHNGPLDNK	[R].AEIPCEDEQEQEHNGPLDNK.[-G]	1xCarbamidomethyl [C5]	0	1	12	-2.18693	-1.6822	0.946468	3.28323	0.504728	0.8046	0.942972	-0.159414	0.987411	1.93668	0.114401	1.14682	0.485317	0.999952
+pH fractionation/SP	P24928	P24928; P24928-2	AEIQELAMVPR	[R].AEIQELAMVPR.[M]		3.35083e-05	1	6	-2.18347	-0.249848	0.380044	0.156696	1.93362	0.00722496	0.613938	-0.605463	0.355203	1.17417	0.0560866	0.960666	0.352782	0.999952
+pH fractionation/SP	O75369-8	O75369-9; O75369-5; O75369-2; O75369-8; O75369-7; O75369-4; O75369-6; O75369; O75369-3	AEISCIDNK	[K].AEISCIDNK.[D]	1xCarbamidomethyl [C5]	0.000246334	1	4	4.91554	4.7166	0.267945	1.82832	-0.19894	0.861149	0.961562	3.807	3.13779	1.6484	0.664209	-0.669203	0.549848	0.999952
+pH fractionation/SP	P21333	P21333; P21333-2	AEISFEDR	[K].AEISFEDR.[K]		0.000275366	1	25	-2.18431	-2.15756	1.55332	0.899171	0.0267542	0.984281	0.995212	0.183692	-3.5989		1.2388	-3.78259		NA
+pH fractionation/SP	P21333	P21333; P21333-2	AEISFEDRK	[K].AEISFEDRK.[D]		0.00223086	1	3	1.79853	2.34645	3.26439	2.29383	0.54792	0.823672	0.948767	1.22007	-0.431411	2.71135	1.78094	-1.65148	0.427697	0.999952
+pH fractionation/SP	P31939	P31939-2; P31939	AEISNAIDQYVTGTIGEDEDLIK	[R].AEISNAIDQYVTGTIGEDEDLIK.[W]		0	1	3	4.78656	4.07071	0.237235	1.19346	-0.715853	0.365832	0.829318	2.71101	1.75048	1.6819	0.43486	-0.960527	0.392458	0.999952
+pH fractionation/SP	Q14203-4	Q14203-4; Q14203; Q14203-6; Q14203-5; Q14203-3; Q14203-2	AEITDAEGLGLK	[R].AEITDAEGLGLK.[L]		4.19381e-05	1	13	-3.95318	0.916256	1.60461		4.86944		NA	-2.47967	-0.224151	0.717144	0.936172	2.25551	0.113818	0.999952
+pH fractionation/SP	O75369-8	O75369-9; O75369-2; O75369-8; O75369-7; O75369-6; O75369; O75369-3	AEITFDDHK	[K].AEITFDDHK.[N]		0.000236593	1	11	-0.40154	0.979185	0.225393		1.38073		NA	0.629103	1.64523	2.17763	0.0574958	1.01613	0.575747	0.999952
+pH fractionation/SP	Q9UBF2	Q9UBF2-2; Q9UBF2	AEITLVATKPEK	[K].AEITLVATKPEK.[L]		4.19381e-05	1	3	-2.27367	-1.82471	1.59936	0.544769	0.448962	0.669248	0.902977	-1.76294	-3.06687	1.45476	0.811554	-1.30393	0.344789	0.999952
+pH fractionation/SP	P20226	P20226; P20226-2	AEIYEAFENIYPILK	[R].AEIYEAFENIYPILK.[G]		3.35083e-05	1	4	-3.92315	-2.11171			1.81144		NA	-2.35182	-0.851838	1.50886	0.347859	1.49998	0.279588	0.999952
+pH fractionation/SP	Q14697; Q14697-2	Q14697; Q14697-2	AEKDEPGAWEETFK	[K].AEKDEPGAWEETFK.[T]		4.19381e-05	2	12	-1.46471	-2.32039	0.471932	0.827268	-0.855684	0.224101	0.818997	-2.26556	-2.65061	0.540175	0.722365	-0.385053	0.572142	0.999952
+pH fractionation/SP	Q96T58	Q96T58	AEKPDATADAEPDANQK	[K].AEKPDATADAEPDANQK.[A]		3.35083e-05	1	1		-0.0465426					NA	-0.990864	-0.564344	0.88175	0.623456	0.42652	0.562595	0.999952
+pH fractionation/SP	Q07687	P56179; Q07687; P56178; P56179-3; P56179-2; P56177	AELAASLGLTQTQVK	[R].AELAASLGLTQTQVK.[I]		0.000318209	1	1	-1.67238	-0.308325	1.17935	2.01848	1.36405	0.496031	0.857331	-0.847578	0.262498	1.63111	0.891607	1.11008	0.359415	0.999952
+pH fractionation/SP	Q96QK1	Q96QK1	AELAELPLR	[K].AELAELPLR.[L]		6.09156e-05	1	21	-0.0253517	-0.141597	0.245892	0.909666	-0.116246	0.841254	0.954538	-1.43579	-1.40939	1.07022	0.243128	0.0264051	0.97598	0.999952
+pH fractionation/SP	Q9H2G2	Q9H2G2-2; SLK_2486_I0; SLK_2486_E0; Q9H2G2	AELANIER	[K].AELANIER.[E]		0.000660158	1	10	2.22126	1.56125	0.360389	0.938647	-0.660008	0.319042	0.820259	1.62633	1.27634	0.431543	0.89627	-0.34999	0.575176	0.999952
+pH fractionation/SP	Q9NVR2	Q9NVR2	AELANSTEVLESFK	[K].AELANSTEVLESFK.[L]		0	1	3	-2.1476	-3.11119	0.187131	2.74696	-0.963588	0.670359	0.903144	-3.41051	-2.02391	2.12608		1.3866		NA
+pH fractionation/SP	Q9UPN4	Q9UPN4; Q9UPN4-2; Q9UPN4-3	AELATLQAR	[K].AELATLQAR.[Q]		0.000420983	1	3	-2.64063	-0.513245			2.12738		NA	-2.05878	-3.27809		3.15115	-1.21931		NA
+pH fractionation/SP	P23246	P23246; P23246-2	AELDDTPMR	[K].AELDDTPMR.[G]	1xOxidation [M8]	0.00149115	1	9	0.670177	-1.74669	0.453465	2.39625	-2.41687	0.272346	0.818997	-0.0936206	-2.40405	1.95735	3.81734	-2.31043	0.403713	0.999952
+pH fractionation/SP	P23246	P23246; P23246-2	AELDDTPMR	[K].AELDDTPMR.[G]		0.000177325	1	26	2.53475	1.44439	0.465075	1.61026	-1.09036	0.322857	0.820259	0.417954	0.123877	1.47247	0.695065	-0.294077	0.770049	0.999952
+pH fractionation/SP	Q8WXF1	Q8WXF1; Q8WXF1-2	AELDGTILK	[K].AELDGTILK.[S]		0.000236593	1	19	-0.862074	-0.207089	0.550286	2.42399	0.654985	0.6589	0.899367	-0.608327	0.238144	2.68758	0.963644	0.846471	0.634657	0.999952
+pH fractionation/SP	Q13523	Q13523	AELDNELMEGK	[K].AELDNELMEGK.[V]	1xOxidation [M8]	8.08306e-05	1	1	-2.14757	-0.162046	0.757434		1.98552		NA							NA
+pH fractionation/SP	Q13523	Q13523	AELDNELMEGK	[K].AELDNELMEGK.[V]		4.19381e-05	1	8	1.33536	1.41336	0.467268	0.950635	0.0779991	0.904668	0.973856	0.583863	-0.0341583	1.55355	1.11637	-0.618021	0.605639	0.999952
+pH fractionation/SP	Q8N511	Q8N511	AELEAALGK	[R].AELEAALGK.[K]		0.000877399	1	2	-1.43074		1.22666				NA	-1.53323	0.267301	4.13995	0.596043	1.80054	0.602306	0.999952
+pH fractionation/SP	Q5VTR2	Q5VTR2	AELEDLR	[K].AELEDLR.[Q]		0.00124955	1	6	2.06081	1.38322	0.121481	2.48244	-0.677591	0.736973	0.921055	-0.450599	-2.30757	5.62194	2.28521	-1.85697	0.707398	0.999952
+pH fractionation/SP	P78559-2	P78559-2; P78559	AELEEMEEVHPSDEEEEDATK	[K].AELEEMEEVHPSDEEEEDATK.[A]		0.000660158	1	1	-0.72728	-1.91594	0.505309		-1.18866		NA	-1.15087	-1.60212	0.621686	0.0961566	-0.45125	0.281939	0.999952
+pH fractionation/SP	Q16204	Q16204	AELEQHLEQEQEFQVNK	[K].AELEQHLEQEQEFQVNK.[L]		0	1	3	-1.42691	-1.66979	1.25312		-0.242877		NA	-2.32029						NA
+pH fractionation/SP	Q96QU8	Q96QU8; Q96QU8-2	AELFELLFR	[K].AELFELLFR.[T]		0.000802534	1	1	-0.238498	-0.742595	0.222743	2.39598	-0.504097	0.73508	0.92045	-1.34166	-1.97294	2.31593	0.157164	-0.63128	0.737576	0.999952
+pH fractionation/SP	Q01082	Q01082-2; Q01082; Q01082-3	AELFTQSCADLDK	[K].AELFTQSCADLDK.[W]	1xCarbamidomethyl [C8]	0	1	8	-1.96373	-1.81087	1.59522	1.71048	0.152859	0.926585	0.980452	-0.608556	0.432941	1.27614	0.170821	1.0415	0.2338	0.999952
+pH fractionation/SP	Q3KQU3	Q3KQU3-2; Q3KQU3-4; Q3KQU3	AELGAGAPPAVVAR	[R].AELGAGAPPAVVAR.[T]		0.000177325	1	4	-2.01282	-2.80212		2.1254	-0.789299		NA	-0.920384	-0.350248	2.19421	0.00601019	0.570136	0.750415	0.999952
+pH fractionation/SP	Q14204	Q14204	AELGEYIR	[R].AELGEYIR.[R]		0.000542627	1	11	-3.36177	-2.88836	2.49325	0.618517	0.473411	0.765548	0.929988	-1.62207	-1.75018	0.251014		-0.128109		NA
+pH fractionation/SP	Q92696	Q92696	AELGFLESCLR	[K].AELGFLESCLR.[V]	1xCarbamidomethyl [C9]	3.35083e-05	1	3	0.362757	-1.6072	1.16641	0.0131384	-1.96995	0.108342	0.818997	-2.45283		1.25202				NA
+pH fractionation/SP	Q13907-2	Q13907-2; Q13907	AELGIPLEEVPPEEINYLTR	[K].AELGIPLEEVPPEEINYLTR.[I]		0.000605261	1	1	-0.0241428	0.503784	0.060507	0.577131	0.527927	0.190209	0.818997	-0.235626	-0.241643	1.2727	1.09745	-0.00601708	0.995349	0.999952
+pH fractionation/SP	O75791	O75791	AELGSQEGYVPK	[K].AELGSQEGYVPK.[N]		4.19381e-05	1	6	-0.0623305	-0.261828	0.925121	1.78544	-0.199498	0.875102	0.966004	-1.05659	-0.544509	2.03993	0.295464	0.512077	0.759658	0.999952
+pH fractionation/SP	Q14761	Q14761	AELGSTDNDLER	[R].AELGSTDNDLER.[Q]		3.35083e-05	1	5	0.619364	-0.842704	0.185295	1.1055	-1.46207	0.0867579	0.818997	-1.9033	-1.67647	3.21477	0.517949	0.226823	0.909784	0.999952
+pH fractionation/SP	Q9UQE7	Q9UQE7	AELGTDLLSQLSLEDQK	[K].AELGTDLLSQLSLEDQK.[R]		0	1	12	1.34527	0.973788	0.596886	0.540726	-0.371482	0.469098	0.85109	-0.170622	-0.233523	1.03815	0.629483	-0.0629013	0.93281	0.999952
+pH fractionation/SP	Q9UQE7	Q9UQE7	AELGTDLLSQLSLEDQKR	[K].AELGTDLLSQLSLEDQKR.[V]		0	1	2	2.79153	2.90927	0.651699	0.508307	0.117732	0.817264	0.947051	2.71931	1.46216	1.14231	0.937273	-1.25715	0.214584	0.999952
+pH fractionation/SP	Q8WUA4	Q8WUA4-2; Q8IWJ2; Q9NTK5-3; Q8WUA4; Q8NI77	AELILLK	[KR].AELILLK.[LDME]		0.00156863	1	12	6.86524	6.08887	0.300374	2.18479	-0.776365	0.574967	0.8772	5.18545	3.21366	2.15383	0.90545	-1.97179	0.217619	0.999952
+pH fractionation/SP	P15924	P15924; P15924-3; P15924-2	AELIVQPELK	[R].AELIVQPELK.[Y]		0.000261709	1	4	-3.61729	-4.18039	3.30067	1.06295	-0.563104	0.837732	0.953389	-3.80542	-4.3321	1.40425		-0.526675		NA
+pH fractionation/SP	Q9HB71	Q9HB71; Q9HB71-3	AELLDNEKPAAVVAPITTGYTVK	[K].AELLDNEKPAAVVAPITTGYTVK.[I]		0	1	19	2.17779	1.58898	0.626714	1.36218	-0.588808	0.533736	0.865736	2.15696	1.41557	1.25636	0.195912	-0.741387	0.369677	0.999952
+pH fractionation/SP	Q12981	Q12981-1; BNIP1_3307_I0; Q12981	AELLQGGDLLR	[K].AELLQGGDLLR.[Q]		0.00359362	1	3	-2.84288	-1.36053	0.828348	0.323061	1.48235	0.142432	0.818997	-0.697394	-0.243002	0.478939	0.731817	0.454392	0.53897	0.999952
+pH fractionation/SP	P14373	P14373-2; P14373	AELLSLTQMER	[R].AELLSLTQMER.[E]		4.19381e-05	1	6	-0.497218	-4.76111	0.302019	3.82351	-4.26389	0.126226	0.818997	-0.0280477	-3.1031			-3.07505		NA
+pH fractionation/SP	P05455	P05455	AELMEISEDK	[K].AELMEISEDK.[T]		4.19381e-05	1	17	-1.49567	-2.85256	1.93992	0.719759	-1.35689	0.319463	0.820259	-2.79937	-3.03834	2.11123	1.83801	-0.238966	0.905289	0.999952
+pH fractionation/SP	Q9Y4A5	Q9Y4A5; Q9Y4A5-2	AELMQALWR	[R].AELMQALWR.[T]		0.000133665	1	1	1.02676	-0.276691	0.0971548	1.10947	-1.30345	0.11258	0.818997	-0.156367	-1.20187	1.09803	0.689299	-1.04551	0.234993	0.999952
+pH fractionation/SP	P23396	P23396-2; P23396	AELNEFLTR	[K].AELNEFLTR.[E]		4.19381e-05	1	51	0.22222	-0.609238	0.657383	2.03604	-0.831458	0.537769	0.86714	-1.41181	-0.734229	1.2247	1.44393	0.677577	0.663058	0.999952
+pH fractionation/SP	P26639-2	P26639; P26639-2	AELNPWPEYIYTR	[R].AELNPWPEYIYTR.[L]		0	1	15	1.25461	1.60137	0.977793	0.795095	0.346759	0.7077	0.911788	-0.496722	-0.190045	0.488396	1.60255	0.306677	0.819936	0.999952
+pH fractionation/SP	O95235	O95235; O95235-2	AELNSTTEELHK	[K].AELNSTTEELHK.[Y]		0	1	5	0.703742	0.0221345	0.921671	0.462508	-0.681607	0.316118	0.820259	-0.654813	-0.0525456	0.80543	0.41106	0.602268	0.312901	0.999952
+pH fractionation/SP	Q13435	Q13435	AELQLPPPPPPGHYGAWAAQELQAK	[K].AELQLPPPPPPGHYGAWAAQELQAK.[L]		0	1	11	-0.692071	-0.495142	0.77559	1.03301	0.196929	0.804787	0.942986	-1.28283	-1.38595	1.40332	1.78941	-0.103127	0.946236	0.999952
+pH fractionation/SP	O00231-2	O00231-2; O00231	AELRDDPIISTHLAK	[R].AELRDDPIISTHLAK.[L]		3.35083e-05	1	4	-2.31714	-3.50175	4.19014	0.560397	-1.18461	0.634638	0.892968	-1.38769		4.14051				NA
+pH fractionation/SP	Q9Y4B6	Q9Y4B6; Q9Y4B6-3; Q9Y4B6-2	AELTTLLEQWEK	[K].AELTTLLEQWEK.[E]		4.19381e-05	1	2	-1.20906	-3.18584	0.140857		-1.97678		NA	-4.56473	-4.54747	0.886489	1.09224	0.0172586	0.985524	0.999952
+pH fractionation/SP	Q9H008	Q9H008; Q9H008-2	AELVGQLQR	[R].AELVGQLQR.[L]		0.000346548	1	2	2.23138	2.53086	1.40325	1.5295	0.299476	0.814977	0.946636	1.07423	0.642036	1.26095	0.510031	-0.432196	0.611368	0.999952
+pH fractionation/SP	Q96ST3	Q96ST3	AELVQLVSPFLGK	[R].AELVQLVSPFLGK.[F]		3.35083e-05	1	6	-4.55299	-2.29543			2.25755		NA	-3.38815	-2.5669	0.908636		0.821249		NA
+pH fractionation/SP	Q9BVI4	Q9BVI4	AELWDTWK	[R].AELWDTWK.[V]		0.000275366	1	7	-0.919442	-1.81812	0.46895	2.73143	-0.898677	0.586922	0.880644	-2.19273	-2.50693	2.41587	0.828821	-0.314209	0.877899	0.999952
+pH fractionation/SP	Q9H6R4	Q9H6R4-2; Q9H6R4; Q9H6R4-4; Q9H6R4-3	AELYKEPTNEELNR	[R].AELYKEPTNEELNR.[L]		4.19381e-05	1	2	0.173391	-1.39829		1.33505	-1.57168		NA	-2.46592	-3.38458	1.64161	0.928024	-0.918667	0.53587	0.999952
+pH fractionation/SP	Q9NVM9	Q9NVM9-2; Q9NVM9	AELYQHLK	[R].AELYQHLK.[E]		0.00199937	1	2	1.11549	-0.762565	0.236853	0.70058	-1.87805	0.0194402	0.730309	0.419506	-1.98517	0.146824		-2.40468		NA
+pH fractionation/SP	O60610	O60610; O60610-3; O60610-2	AEMDEVER	[R].AEMDEVER.[F]		0.000420983	1	6	6.21536	2.19341	0.71759	3.00349	-4.02196	0.087076	0.818997	2.54772	1.06338	2.39208	2.62255	-1.48435	0.508982	0.999952
+pH fractionation/SP	P19367-3	P19367; P19367-3; P19367-4; P19367-2	AEMELGLR	[R].AEMELGLR.[K]		0.000553704	1	13	-0.505167	0.331196	0.543936	0.92029	0.836362	0.24686	0.818997	-2.28563	-1.53261			0.753015		NA
+pH fractionation/SP	Q9H089	Q9H089	AEMTCSGILPIDQMR	[K].AEMTCSGILPIDQMR.[D]	1xCarbamidomethyl [C5]	3.35083e-05	1	1	7.51038	6.07275	0.212593	2.72758	-1.43763	0.414225	0.837785	4.9809	3.61977	2.01639	0.450996	-1.36113	0.317543	0.999952
+pH fractionation/SP	Q9Y5Z4	Q9Y5Z4-2; Q9Y5Z4	AEMTVFVR	[R].AEMTVFVR.[S]		0.00436762	1	2	-0.103198	-0.463439	1.46987	0.935193	-0.360242	0.738331	0.921468	-1.17673	-1.90114		0.782958	-0.724412		NA
+pH fractionation/SP	Q9HD20	Q9HD20-2; Q9HD20	AEMVVPDFSELFK	[K].AEMVVPDFSELFK.[E]		0	1	8	0.803811	0.177757	1.08357	0.941263	-0.626054	0.492002	0.856036	-0.0417346	0.195659	0.890638	0.853664	0.237393	0.786522	0.999952
+pH fractionation/SP	P78559-2	P78559-2; P78559	AENEEAAACPAWER	[K].AENEEAAACPAWER.[G]	1xCarbamidomethyl [C9]	4.19381e-05	1	3	-1.28863	-2.66634	0.733677	3.04989	-1.37771	0.476527	0.853192	-1.00006	-1.26923	1.18997	0.734368	-0.26917	0.798968	0.999952
+pH fractionation/SP	P59998-3	P59998; P59998-2; P59998-3; P59998-4	AENFFILR	[R].AENFFILR.[R]		0.000236593	1	26	-2.79564	1.37763	0.944895	3.46935	4.17327	0.123033	0.818997	-1.5336	-1.31098	1.58979	0.394635	0.22262	0.864999	0.999952
+pH fractionation/SP	P04406	P04406-2; P04406	AENGKLVINGNPITIFQER	[K].AENGKLVINGNPITIFQER.[D]		0.000836425	1	2	-3.28331	-1.5119	0.69702	1.81894	1.77141	0.190353	0.818997	-1.02607	1.1519	2.99845	1.20433	2.17797	0.307874	0.999952
+pH fractionation/SP	P04406	P04406-2; P04406	AENGKLVINGNPITIFQERDPSK	[K].AENGKLVINGNPITIFQERDPSK.[I]		0	1	7	-2.05067	-1.46537	1.94358	0.217377	0.585297	0.713287	0.91377	0.603272						NA
+pH fractionation/SP	Q5JSL3	Q5JSL3	AENIMASLER	[K].AENIMASLER.[S]		0.00187141	1	1	-3.38414	-2.84765	1.61924	1.2272	0.536493	0.671151	0.903264	-3.03112	-3.2279	2.13392		-0.196782		NA
+pH fractionation/SP	Q92544	Q92544	AENLGEVLR	[K].AENLGEVLR.[G]		0.000261709	1	12	3.37685	2.10267	0.225335	1.16857	-1.27418	0.137286	0.818997	1.31215	0.226965	1.55015	0.671368	-1.08518	0.328217	0.999952
+pH fractionation/SP	O94992	O94992	AENLQLLTENELHR	[R].AENLQLLTENELHR.[Q]		0	1	8	-0.834795	-0.805011	0.0696109	1.87158	0.0297838	0.979345	0.993408	0.205889	0.320641	0.933327	0.793598	0.114752	0.878986	0.999952
+pH fractionation/SP	P49454	P49454	AENLVLSTNLR	[K].AENLVLSTNLR.[N]		4.19381e-05	1	1	-3.69101	-1.05431		0.581617	2.6367		NA	-1.85482	-1.50333	0.951475	0.629511	0.35149	0.683932	0.999952
+pH fractionation/SP	Q08211	Q08211	AENNSEVGASGYGVPGPTWDR	[K].AENNSEVGASGYGVPGPTWDR.[G]		0	1	19	-3.48121	-0.550635			2.93057		NA	-2.10046	-1.54029	0.155452	1.71318	0.560173	0.690363	0.999952
+pH fractionation/SP	Q5T0B9	Q5T0B9	AENPGGPPVLVVPYPILASGETAK	[K].AENPGGPPVLVVPYPILASGETAK.[E]		4.19381e-05	1	1	-0.196516	1.56713	0.564242		1.76365		NA	0.32231	2.09864	2.37038	0.342609	1.77633	0.390921	0.999952
+pH fractionation/SP	Q8IXT5	Q8IXT5	AENPYLFLR	[K].AENPYLFLR.[G]		0.000177325	1	4		0.0165902		2.80549			NA	-1.34979	-0.497176	3.24303	0.274494	0.852614	0.748048	0.999952
+pH fractionation/SP	P51572-2	P51572-2; P51572	AENQVLAMR	[K].AENQVLAMR.[K]		0.000177325	1	14	2.94125	3.29488	0.589555	0.951328	0.353634	0.632573	0.892558	0.348572	0.337143	3.41906	0.522401	-0.0114291	0.996722	0.999952
+pH fractionation/SP	Q9P2N6	Q9P2N6-5; Q9P2N6-3; Q9P2N6-8; Q9P2N6; Q9P2N6-2; Q9P2N6-4; Q9P2N6-6	AENSLVVVGGADDNLR	[R].AENSLVVVGGADDNLR.[I]		0	1	1		-0.0451808					NA	1.07121	-0.110902		3.11954	-1.18211		NA
+pH fractionation/SP	Q9P2E9	Q9P2E9-3; Q9P2E9	AENSQLTER	[R].AENSQLTER.[I]		0.000398881	1	1		1.67745					NA	0.521035	0.927994	2.16536	1.00625	0.406959	0.782526	0.999952
+pH fractionation/SP	P46459	P46459; P46459-2	AENSSLNLIGK	[K].AENSSLNLIGK.[A]		4.19381e-05	1	7	0.315569	0.692731	0.233824	0.749893	0.377162	0.452371	0.847226	1.09491	0.784347	1.43766	0.624182	-0.310566	0.748721	0.999952
+pH fractionation/SP	P30519	P30519-2; P30519	AENTQFVK	[R].AENTQFVK.[D]		0.000605261	1	3	-2.60841	-3.17826			-0.56985		NA	-1.55295	-1.98877	1.02547	1.592	-0.435822	0.72659	0.999952
+pH fractionation/SP	Q9NS87	Q9NS87-3; Q9NS87; Q9NS87-2	AENVFLK	[R].AENVFLK.[E]		0.00425308	1	1	1.88778	-0.779923	0.3321	1.41781	-2.66771	0.0337579	0.804551	-1.26311	-2.6114	2.7488	1.88227	-1.34829	0.595328	0.999952
+pH fractionation/SP	P22314	P22314-2; P22314	AENYDIPSADR	[R].AENYDIPSADR.[H]		4.19381e-05	1	27	2.49715	0.437507	0.715117	2.75766	-2.05964	0.275461	0.818997	-0.278317	-0.321915	2.07073	0.469243	-0.0435983	0.9795	0.999952
+pH fractionation/SP	P22314	P22314-2; P22314	AENYDIPSADRHK	[R].AENYDIPSADRHK.[S]		9.74898e-05	1	2	-0.178608	1.8383	0.172912	0.939231	2.01691	0.0216194	0.7494	2.22075	3.76042	1.35608	0.830329	1.53968	0.168823	0.999952
+pH fractionation/SP	Q9BVA0	Q9BVA0	AEPAIIPATR	[K].AEPAIIPATR.[N]		0.00579457	1	2	0.393629	0.178337	0.932403	1.50508	-0.215292	0.851307	0.958151	-1.61091	-0.180937	2.865	0.4984	1.42997	0.558732	0.999952
+pH fractionation/SP	P00558	P00558-2; P00558	AEPAKIEAFR	[K].AEPAKIEAFR.[A]		4.19381e-05	1	21	-0.585802	0.612816	1.84214	3.03054	1.19862	0.589723	0.881042	0.981476	0.842273	1.99616	0.322891	-0.139204	0.9318	0.999952
+pH fractionation/SP	O60281	O60281-2; O60281	AEPASAAELSSVR	[K].AEPASAAELSSVR.[K]		4.19381e-05	1	2	-4.50777	1.61125			6.11902		NA	-1.64218	0.260555	1.86713	1.07821	1.90273	0.201109	0.999952
+pH fractionation/SP	P61088	Q5JXB2; P61088	AEPDESNAR	[K].AEPDESNAR.[Y]		0.00121573	1	3	-0.731047	-1.09488	0.646555		-0.363834		NA	-0.527074	-2.95719			-2.43011		NA
+pH fractionation/SP	P41252	P41252	AEPDHMVLGK	[R].AEPDHMVLGK.[R]		9.74898e-05	1	16	2.87272	0.825603	0.103164	1.6219	-2.04712	0.097163	0.818997	1.42828	-0.923572		0.278933	-2.35186		NA
+pH fractionation/SP	Q8N5Y2	Q8N5Y2-6; Q8N5Y2; Q8N5Y2-2; Q8N5Y2-3; Q8N5Y2-5; Q8N5Y2-4	AEPEALQSLR	[K].AEPEALQSLR.[R]		0.00553308	1	1	-4.66573	-2.06299		3.75629	2.60273		NA	2.6184	1.29052	0.0577511	0.54077	-1.32788	0.046248	0.999952
+pH fractionation/SP	P61158	P61158	AEPEDHYFLLTEPPLNTPENR	[R].AEPEDHYFLLTEPPLNTPENR.[E]		0	1	47	0.207812	0.879012	0.648612	0.168473	0.671201	0.265461	0.818997	1.45105	-0.368272	1.83377	0.0210494	-1.81932	0.275293	0.999952
+pH fractionation/SP	Q9Y6N5	Q9Y6N5	AEPLETFPFDQSK	[K].AEPLETFPFDQSK.[E]		0	1	8	-2.21025	-0.941333	0.515134	1.20848	1.26892	0.16964	0.818997	-0.957499	0.319445	1.38244	0.359285	1.27694	0.196436	0.999952
+pH fractionation/SP	Q9UHD1	Q9UHD1; Q9UHD1-2	AEPMQWASLELPAAK	[K].AEPMQWASLELPAAK.[K]		0	1	9	-1.86448	-2.62829	1.6518	1.15875	-0.763809	0.547832	0.869954	-0.518489	0.194206	3.32594		0.712695		NA
+pH fractionation/SP	Q9UHD1	Q9UHD1; Q9UHD1-2	AEPMQWASLELPAAK	[K].AEPMQWASLELPAAK.[K]	1xOxidation [M4]	0.000579178	1	1	1.85561	1.61796	0.510994	1.84134	-0.237656	0.839986	0.95386	0.450936	-0.175716	0.545564	1.00715	-0.626652	0.396996	0.999952
+pH fractionation/SP	Q12906-7	Q12906; Q12906-5; Q12906-7; Q12906-6; Q12906-4; Q12906-2; Q12906-3	AEPPQAMNALMR	[K].AEPPQAMNALMR.[L]		4.19381e-05	1	31	-0.914744	-1.04367	0.915656	1.77724	-0.128928	0.916445	0.977317	0.425372	-1.52275		0.29321	-1.94813		NA
+pH fractionation/SP	P63244	P63244	AEPPQCTSLAWSADGQTLFAGYTDNLVR	[K].AEPPQCTSLAWSADGQTLFAGYTDNLVR.[V]	1xCarbamidomethyl [C6]	0	1	16	-2.07743	-1.68123	0.397506	0.61649	0.396199	0.524766	0.863048	-0.979232	-3.8077	0.630785	6.34786	-2.82847	0.594663	0.999952
+pH fractionation/SP	Q6PIF6	Q6PIF6; Q6PIF6-2	AEPPTWLELQAVK	[R].AEPPTWLELQAVK.[S]		4.19381e-05	1	2	-0.30193	-1.02727	0.681453	1.39149	-0.72534	0.475708	0.852956	-1.09903	-0.818228	1.63172		0.280802		NA
+pH fractionation/SP	Q9NR30	Q9NR30	AEPSEVDMNSPK	[K].AEPSEVDMNSPK.[S]		3.35083e-05	1	13	-1.28261	-0.39471	0.0888118	0.661096	0.887896	0.170731	0.818997	-1.2837	-1.25904	2.23632	1.30595	0.0246565	0.987633	0.999952
+pH fractionation/SP	Q9H8H0	Q9H8H0	AEPSFYPR	[K].AEPSFYPR.[N]		0.00293532	1	5	0.903451	0.314657			-0.588794		NA	-0.00837032	0.612329	0.309863		0.620699		NA
+pH fractionation/SP	Q86YP4-3	Q86YP4; Q86YP4-2; Q86YP4-3	AEPTAAPHPVLK	[K].AEPTAAPHPVLK.[Q]		4.19381e-05	1	11	-1.47792	-2.44788		2.37997	-0.969955		NA	-3.54359	-4.36164			-0.818054		NA
+pH fractionation/SP	P09874	P09874	AEPVEVVAPR	[K].AEPVEVVAPR.[G]		4.19381e-05	1	32	0.665999	-0.0466807	0.299451	0.911806	-0.71268	0.267772	0.818997	-1.7539	-1.94805	1.80133	0.77441	-0.194141	0.872159	0.999952
+pH fractionation/SP	Q9BUJ2	Q9BUJ2; Q9BUJ2-2; Q9BUJ2-3; Q9BUJ2-4	AEPYCSVLPGFTFIQHLPLSER	[R].AEPYCSVLPGFTFIQHLPLSER.[I]	1xCarbamidomethyl [C5]	0	1	7	0.979917	-1.5331		0.979841	-2.51302		NA	0.422112	-0.516891	0.111039	0.390382	-0.939002	0.082076	0.999952
+pH fractionation/SP	P49454	P49454	AEQAFQASQIK	[R].AEQAFQASQIK.[E]		0.000133665	1	1	2.12076	-0.878506	0.839947	2.78299	-2.99927	0.148463	0.818997	0.140077	-2.42443	1.54333	0.830846	-2.5645	0.174408	0.999952
+pH fractionation/SP	Q16204	Q16204	AEQEEEFISNTLFK	[R].AEQEEEFISNTLFK.[K]		4.19381e-05	1	1	-0.100783	-0.479069	1.41418	0.558365	-0.378285	0.68872	0.9069	-0.45845	-1.05856	2.20516	1.41082	-0.600107	0.711605	0.999952
+pH fractionation/SP	P78356	P78356	AEQEEMEVEER	[R].AEQEEMEVEER.[A]		4.19381e-05	1	3	-2.40913	-2.70774	1.71978		-0.298606		NA							NA
+pH fractionation/SP	Q6ZRS2	Q6ZRS2-2; Q6ZRS2-3; Q6ZRS2	AEQEIAALVEQLTPIER	[R].AEQEIAALVEQLTPIER.[Y]		0.002768	1	1	-1.24496		1.76754				NA	-2.38305	-2.70356	2.34839	1.00539	-0.320511	0.875509	0.999952
+pH fractionation/SP	Q9NZI8	Q9NZI8; Q9NZI8-2	AEQEIMK	[R].AEQEIMK.[K]		0.00391717	1	1	-0.690904	-2.67911	0.118604		-1.9882		NA	-1.89529	-2.50033	1.81756	0.882394	-0.605045	0.631354	0.999952
+pH fractionation/SP	P50851-2	P50851-2; P50851	AEQENQELPDEGTLEETLTNETR	[K].AEQENQELPDEGTLEETLTNETR.[N]		0.000177325	1	1	-1.36214	3.23366	0.178881		4.59579		NA	2.33643	1.23491	1.70571	0.241111	-1.10151	0.461291	0.999952
+pH fractionation/SP	Q9NU22	Q9NU22	AEQESGLYR	[K].AEQESGLYR.[Y]		0.000877399	1	3	-3.84725	0.730126			4.57738		NA	-2.85313	0.193825	0.948195	1.49081	3.04695	0.134915	0.999952
+pH fractionation/SP	Q02218	Q02218-2; Q02218; Q02218-3	AEQFYCGDTEGK	[K].AEQFYCGDTEGK.[K]	1xCarbamidomethyl [C6]	4.19381e-05	1	4	-1.57701	-2.13424	0.947999	0.94926	-0.557222	0.56565	0.875021	-2.02122	-0.993669		0.533173	1.02755		NA
+pH fractionation/SP	Q9UJZ1	Q9UJZ1-2; Q9UJZ1	AEQINQAAGEASAVLAK	[K].AEQINQAAGEASAVLAK.[A]		0	1	15	0.270592	0.66891			0.398318		NA	1.05762	0.115204			-0.942419		NA
+pH fractionation/SP	Q9HCS7	Q9HCS7	AEQLAAEAER	[R].AEQLAAEAER.[D]		0.000177325	1	5	1.60763	-0.00698016	0.621755	1.52869	-1.61461	0.165399	0.818997	-2.23281	-4.13939	2.59879		-1.90658		NA
+pH fractionation/SP	Q96GD0	Q96GD0	AEQLFSSALCAAR	[R].AEQLFSSALCAAR.[L]	1xCarbamidomethyl [C10]	3.35083e-05	1	4	1.39602	-0.46526	0.767451	2.32916	-1.86128	0.263009	0.818997		-0.819225		1.22623			NA
+pH fractionation/SP	Q9NQ29	Q9NQ29-3; Q9NQ29; Q9NQ29-2	AEQLGAEGNVDESQK	[K].AEQLGAEGNVDESQK.[I]		0	1	3	-2.22475	-3.41738	0.0557078	1.48449	-1.19263	0.373961	0.829794	-6.0844						NA
+pH fractionation/SP	Q96ST3	Q96ST3	AEQLMSDENCFK	[K].AEQLMSDENCFK.[L]	1xCarbamidomethyl [C10]	3.35083e-05	1	3	-1.41597	-1.97895	0.423674	1.21035	-0.56298	0.598014	0.882974	-1.83715	-1.27101	0.383199		0.566141		NA
+pH fractionation/SP	O75400-3; O75400	O75400-2; O75400-3; O75400	AEQMFGEMEVWNAISER	[K].AEQMFGEMEVWNAISER.[D]		0	2	2	-3.41153	-1.45322	0.951736	1.11328	1.95831	0.199198	0.818997	-3.20317	-2.52356	0.501379	0.772338	0.679608	0.306399	0.999952
+pH fractionation/SP	Q02086	Q02086; Q02086-2	AEQQQVVQIPQQALR	[K].AEQQQVVQIPQQALR.[V]		4.19381e-05	1	1		-1.14189					NA	-2.39338	-1.07104	1.68547	0.357494	1.32234	0.391161	0.999952
+pH fractionation/SP	Q13586	Q13586-2; Q13586	AEQSLHDLQER	[R].AEQSLHDLQER.[L]		3.35083e-05	1	9	-1.66044	-3.16108			-1.50063		NA	-0.526053	0.508297	0.155778	0.435835	1.03435	0.0872155	0.999952
+pH fractionation/SP	Q96DB5	Q96DB5-2; Q96DB5	AEQVDPNFYSK	[R].AEQVDPNFYSK.[N]		0.000420983	1	2	2.80788	1.22188	0.50976	1.44665	-1.586	0.147786	0.818997	0.0442333	0.41839	2.13138	0.659857	0.374157	0.785905	0.999952
+pH fractionation/SP	P11233	P11233	AEQWNVNYVETSAK	[R].AEQWNVNYVETSAK.[T]		0	1	2	5.21632	6.68263	0.28393	4.29605	1.46631	0.586975	0.88066	7.62979	11.1111	2.81968	2.48898	3.48136	0.184146	0.999952
+pH fractionation/SP	Q14204	Q14204	AERPDVDEK	[K].AERPDVDEK.[R]		0.000877399	1	9	-0.507191	0.658603	2.39421		1.16579		NA	-6.03276	-6.56444			-0.531677		NA
+pH fractionation/SP	Q99661	Q99661; Q99661-2	AESALAQQAK	[K].AESALAQQAK.[H]		6.09156e-05	1	1	-3.35718	-0.918985		2.52252	2.43819		NA	0.417317	-0.854057	3.71039	0.0138261	-1.27137	0.676989	0.999952
+pH fractionation/SP	O95674	CDS2_6087_E0; O95674	AESAPLPVSADDTPEVLNR	[R].AESAPLPVSADDTPEVLNR.[A]		0	1	14	-1.59726	-0.908135			0.689124		NA	-2.87206	-2.00167	3.50753		0.870392		NA
+pH fractionation/SP	Q92581-2	Q92581; Q92581-3; Q92581-2	AESAWLFR	[K].AESAWLFR.[M]		0.00149115	1	2	0.234195	-0.963249	0.593135	3.77635	-1.19744	0.616245	0.888548	0.283072	-1.32925	1.18991	3.86619	-1.61232	0.527937	0.999952
+pH fractionation/SP	Q9H2U1	Q9H2U1-2; Q9H2U1; Q9H2U1-3	AESCGSGNSTGYQIR	[R].AESCGSGNSTGYQIR.[L]	1xCarbamidomethyl [C4]	0	1	2	1.16073	-0.185995	0.0940259	2.60036	-1.34672	0.540354	0.867961	0.418161	-0.755636	1.1251	0.68977	-1.1738	0.335408	0.999952
+pH fractionation/SP	Q5MIZ7; Q6IN85	Q5MIZ7-3; Q6IN85-2; Q5MIZ7; Q6IN85; Q5MIZ7-2; Q6IN85-4; Q6IN85-5	AESDGSLLLESK	[R].AESDGSLLLESK.[I]		4.19381e-05	2	10	1.67987	-0.255638	0.538173	0.673129	-1.9355	0.0363921	0.809966	-0.0553976	-0.561984	0.680726	0.191749	-0.506587	0.417672	0.999952
+pH fractionation/SP	P50851-2	P50851-2; P50851	AESDLFLAEHHK	[K].AESDLFLAEHHK.[L]		6.09156e-05	1	2	-2.08929	-1.0207	0.710382	1.0814	1.06859	0.225809	0.818997	-2.90103	-4.01253	1.4983	1.56065	-1.1115	0.48151	0.999952
+pH fractionation/SP	Q96QE3	Q96QE3; Q96QE3-2	AESEASLLNVSTPK	[K].AESEASLLNVSTPK.[S]		0	1	2		-0.910539					NA	-1.61659	-0.236718	2.38919	0.70781	1.37987	0.391804	0.999952
+pH fractionation/SP	Q15437	Q15437	AESEEGPDVLR	[R].AESEEGPDVLR.[W]		0.000177325	1	2	-2.10825	-1.08556	0.714518		1.02269		NA	-1.96916	-1.1042	1.4334	0.30908	0.864969	0.482024	0.999952
+pH fractionation/SP	P34932	P34932	AESEEMETSQAGSK	[K].AESEEMETSQAGSK.[D]		0	1	7	5.48908	2.00425	0.610627	2.74559	-3.48483	0.0984266	0.818997	2.04788	2.11013	2.70165	0.451427	0.062249	0.977437	0.999952
+pH fractionation/SP	P13798	P13798	AESFFQTK	[K].AESFFQTK.[A]		0.000261709	1	11	-1.12614	-0.953532	0.145035	0.969374	0.172611	0.826564	0.949362							NA
+pH fractionation/SP	Q9H9A5-6	Q9H9A5-6; Q9H9A5-3; Q9H9A5-4; Q9H9A5; Q9H9A5-2	AESGALIEAAK	[K].AESGALIEAAK.[S]		4.19381e-05	1	3	4.74121	3.10384	0.640264	0.438093	-1.63737	0.0537755	0.818997	-0.566787	-0.695099	3.01603	0.287572	-0.128312	0.958167	0.999952
+pH fractionation/SP	O43719	O43719	AESGWFHVEEDR	[K].AESGWFHVEEDR.[N]		0	1	31	3.53762	3.62666	0.483017	0.971921	0.0890421	0.893871	0.970602	2.65671	3.07944	0.808279	0.857279	0.422724	0.567986	0.999952
+pH fractionation/SP	Q14683	Q14683	AESLIGVYPEQGDCVISK	[K].AESLIGVYPEQGDCVISK.[V]	1xCarbamidomethyl [C14]	0	1	8	-1.8964	-0.399359	2.95949	1.24899	1.49704	0.577581	0.87835		-1.15519		2.44909			NA
+pH fractionation/SP	P22830-2	P22830-2; P22830	AESLNGNPLFSK	[R].AESLNGNPLFSK.[A]		4.19381e-05	1	2	0.860893	1.79039	1.3573	1.19854	0.929494	0.424187	0.839359	1.55011	1.70057	0.789208	0.029022	0.150455	0.757975	0.999952
+pH fractionation/SP	Q14203-4	Q14203-4; Q14203; Q14203-6; Q14203-5; Q14203-3; Q14203-2	AESLQQEVEALK	[R].AESLQQEVEALK.[E]		3.35083e-05	1	5	-2.36985	-2.72054	0.314542		-0.350689		NA	-1.62632	-3.18225	1.4716	0.842165	-1.55593	0.323877	0.999952
+pH fractionation/SP	P46459	P46459; P46459-2	AESLQVTR	[K].AESLQVTR.[G]		0.00073701	1	3	0.0720588	-1.78944	0.139405	1.98867	-1.8615	0.17533	0.818997	-1.28864	-4.2405	1.14978		-2.95186		NA
+pH fractionation/SP	Q7Z6Z7	Q7Z6Z7-2; Q7Z6Z7; Q7Z6Z7-3	AESPEEVACR	[R].AESPEEVACR.[K]	1xCarbamidomethyl [C9]	0.000192563	1	5	-1.80464	-3.17548	0.983779		-1.37084		NA	-3.72915	-3.8837		1.0533	-0.154556		NA
+pH fractionation/SP	Q96PZ2	Q96PZ2	AESPEYVHMYTQR	[K].AESPEYVHMYTQR.[S]		4.19381e-05	1	1		1.23857					NA	-0.0771412	1.32332	2.03594	0.468967	1.40047	0.443201	0.999952
+pH fractionation/SP	P12270	P12270	AESQLLECK	[K].AESQLLECK.[A]	1xCarbamidomethyl [C8]	0.000177325	1	3	-0.448052	-0.634038	1.53247	1.7171	-0.185986	0.89545	0.97116	-3.33163	-1.3244	2.10186		2.00723		NA
+pH fractionation/SP	Q9NZI7	Q9NZI7; Q9NZI7-4	AESSDGIHIILK	[K].AESSDGIHIILK.[-]		4.19381e-05	1	2	-1.12979	0.0604656		0.566023	1.19026		NA	-0.35722	-0.0288289	1.68617	0.325412	0.328391	0.812465	0.999952
+pH fractionation/SP	Q9H967	Q9H967	AESTLQNSSSAVHTESNK	[K].AESTLQNSSSAVHTESNK.[L]		0	1	2	-5.74131	-1.30674		3.55449	4.43456		NA	-0.502493	-1.57815	0.440886	3.53062	-1.07565	0.711196	0.999952
+pH fractionation/SP	Q13098-7	Q13098; Q13098-6; Q13098-7; Q13098-5	AESTPEIAEQR	[K].AESTPEIAEQR.[G]		4.19381e-05	1	4	-0.723029	-1.43443	0.795717	0.490227	-0.711404	0.351808	0.826074	-1.71964	-1.52415	0.895405	0.23678	0.19549	0.792149	0.999952
+pH fractionation/SP	Q9BWS9	Q9BWS9-3; Q9BWS9; Q9BWS9-2	AESVVLEHR	[K].AESVVLEHR.[S]		0.000360009	1	4	4.99183	2.35328	0.678705	2.07307	-2.63855	0.10423	0.818997	4.09055	3.14493	1.51317	1.71771	-0.945612	0.513855	0.999952
+pH fractionation/SP	Q9NPF5	Q9NPF5	AETDHLFDLSR	[K].AETDHLFDLSR.[R]		4.19381e-05	1	7	3.5505	1.42503	0.11518	1.31604	-2.12547	0.0494785	0.818997	0.660128	-0.902694	2.44187	0.968812	-1.56282	0.36105	0.999952
+pH fractionation/SP	P13645	P13645	AETECQNTEYQQLLDIK	[R].AETECQNTEYQQLLDIK.[I]	1xCarbamidomethyl [C5]	0	1	26	1.34804	1.03624	1.64124	0.563385	-0.3118	0.820359	0.947934	1.72258	1.23894	1.46471	0.974694	-0.483646	0.734936	0.999952
+pH fractionation/SP	Q15436	Q15436-2; Q15436	AETEEGPDVLR	[R].AETEEGPDVLR.[W]		4.19381e-05	1	10	-4.93582	1.40653	2.52902		6.34235		NA	-1.0544	0.385948			1.44035		NA
+pH fractionation/SP	P29590-8; P29590	P29590-5; P29590-3; P29590-13; P29590-12; P29590-2; P29590-14; P29590-4; P29590-10; P29590-9; P29590-8; P29590; P29590-11	AETEELIR	[R].AETEELIR.[E]		0.000579178	2	7	-2.07337	-2.085	1.08823	1.34739	-0.0116298	0.992608	0.998172	-0.93205	-0.785414	1.39003	1.95222	0.146635	0.926343	0.999952
+pH fractionation/SP	O14646	O14646-2; O14646	AETHENEPGPLTVGDELLSQFK	[R].AETHENEPGPLTVGDELLSQFK.[V]		0	1	6	-0.379933	-2.5479	0.27083	2.56914	-2.16797	0.21145	0.818997	-3.53175	-3.96511	2.37201	0.292636	-0.433357	0.822835	0.999952
+pH fractionation/SP	Q96EE3-1	Q96EE3; Q96EE3-1	AETLMTVTDPVHDIAFAPNLGR	[K].AETLMTVTDPVHDIAFAPNLGR.[S]	1xOxidation [M5]	4.19381e-05	1	2	-3.12961	1.21081	1.4447	4.00605	4.34042	0.286197	0.819124	3.72874	1.71325	0.768477	0.788193	-2.01549	0.0664898	0.999952
+pH fractionation/SP	Q96EE3-1	Q96EE3; Q96EE3-1	AETLMTVTDPVHDIAFAPNLGR	[K].AETLMTVTDPVHDIAFAPNLGR.[S]		0	1	9	-1.34532	-0.673114	0.944229	0.583764	0.672209	0.353452	0.826476	-1.50351	-0.954854	0.585133	1.36757	0.548653	0.557664	0.999952
+pH fractionation/SP	Q12800	Q12800; Q12800-3	AETNDSYHIILK	[K].AETNDSYHIILK.[-]		4.19381e-05	1	3	-1.69083	-0.632872	0.230154	0.2195	1.05795	0.0138591	0.683981	-1.71421	-1.9133	1.6439	1.15319	-0.199087	0.901339	0.999952
+pH fractionation/SP	P18858	P18858-3; P18858; P18858-2	AETPTESVSEPEVATK	[K].AETPTESVSEPEVATK.[Q]		3.35083e-05	1	2	2.64248	0.0485653	0.637766	2.91701	-2.59391	0.206859	0.818997	1.02134	0.777743	1.56523	0.0511265	-0.243601	0.848015	0.999952
+pH fractionation/SP	Q9UNP9-3	Q9UNP9; Q9UNP9-3; Q9UNP9-2	AETQEGEPIAK	[K].AETQEGEPIAK.[K]		0.00049065	1	1		0.835264					NA	1.08962	0.958069	0.252745	0.135179	-0.131552	0.582868	0.999952
+pH fractionation/SP	P51608-2	MECP2_1413_E0; P51608-2; P51608	AETSEGSGSAPAVPEASASPK	[K].AETSEGSGSAPAVPEASASPK.[Q]		0	1	2	1.64303	0.321833	0.346415	1.07271	-1.3212	0.112207	0.818997	0.0659504	-1.56742	1.21216	1.183	-1.63337	0.170182	0.999952
+pH fractionation/SP	Q8TBC4	Q8TBC4; Q8TBC4-2	AEVAAEFLNDR	[K].AEVAAEFLNDR.[V]		4.19381e-05	1	7	-0.862328	-0.0652057	0.59408	1.09554	0.797122	0.330055	0.822316	0.0116019	-0.14077	1.96884	0.728043	-0.152372	0.906015	0.999952
+pH fractionation/SP	Q9Y2X7-3	Q9Y2X7-2; Q9Y2X7; Q9Y2X7-3	AEVCADCSAPDPGWASISR	[R].AEVCADCSAPDPGWASISR.[G]	2xCarbamidomethyl [C4; C7]	0	1	1	1.12665	1.56899	0.499098	0.310223	0.442341	0.262287	0.818997	1.25847	1.90103	0.862187	0.603968	0.642565	0.350018	0.999952
+pH fractionation/SP	Q92888-3	Q92888-4; Q92888-3; Q92888; Q92888-2	AEVDAEKPGATDR	[K].AEVDAEKPGATDR.[K]		9.74898e-05	1	1	1.0401	-0.152261	0.67001		-1.19236		NA	1.57008	-1.96338			-3.53347		NA
+pH fractionation/SP	O75150	O75150; O75150-4; O75150-3	AEVDELR	[K].AEVDELR.[S]		0.00306129	1	4	-1.11394	-1.5975	0.623527	0.380374	-0.483563	0.409864	0.836476	-1.00391	-0.620807	1.4262	0.662679	0.383102	0.754648	0.999952
+pH fractionation/SP	Q14204	Q14204	AEVDMDTDAPQVSHKPGGEPK	[K].AEVDMDTDAPQVSHKPGGEPK.[I]		0	1	10	-0.929476	-0.961137	0.0727962	1.11505	-0.0316612	0.96059	0.988668	-1.98592	-2.58468	0.940952	1.46175	-0.598758	0.582922	0.999952
+pH fractionation/SP	Q00839	Q00839-2; Q00839	AEVEGKDLPEHAVLK	[K].AEVEGKDLPEHAVLK.[M]		0	1	5	-4.1581	-2.38305	1.32116	0.933411	1.77505	0.169115	0.818997							NA
+pH fractionation/SP	Q9NW13	Q9NW13; Q9NW13-2	AEVEQVELPDGK	[K].AEVEQVELPDGK.[K]		0	1	9	1.60943	-0.409558	0.82778	4.36879	-2.01899	0.475578	0.852956	-0.387824	-0.500299	1.54567	1.35731	-0.112474	0.929104	0.999952
+pH fractionation/SP	P57764	P57764	AEVETISK	[R].AEVETISK.[E]		0.000962224	1	3	-0.24184	-3.76033	1.5027		-3.51849		NA	-0.22172	-3.47644	0.710163		-3.25472		NA
+pH fractionation/SP	Q15393	Q15393; Q15393-3	AEVIMNYHVGETVLSLQK	[K].AEVIMNYHVGETVLSLQK.[T]		3.35083e-05	1	7	-0.237524	1.28106	0.509462	2.67849	1.51859	0.389324	0.832381	3.51117	4.96354	3.12563	0.788482	1.45237	0.47877	0.999952
+pH fractionation/SP	Q9NV88	Q9NV88-2; Q9NV88; Q9NV88-3	AEVLALPFK	[R].AEVLALPFK.[R]		0.000177325	1	2	-4.84264	-2.83455	0.303857	1.76804	2.00809	0.25425	0.818997	-0.708275	-1.85612	0.900187	0.664409	-1.14785	0.283899	0.999952
+pH fractionation/SP	Q8IY37	Q8IY37	AEVLPQINLDHYSVLPAGEGDEDR	[R].AEVLPQINLDHYSVLPAGEGDEDR.[E]		3.35083e-05	1	5	-1.07804	0.120621	0.712258	2.02373	1.19866	0.387986	0.831888	1.69041	1.88947	2.17421	1.08893	0.199068	0.894097	0.999952
+pH fractionation/SP	Q14571	Q14571	AEVLQAFK	[R].AEVLQAFK.[Q]		0.00140139	1	2		-0.367175					NA	0.0582233	-1.94903	0.191432	0.276446	-2.00725	0.013743	0.999952
+pH fractionation/SP	Q7L1Q6-3	Q7L1Q6-2; Q7L1Q6-4; Q7L1Q6-3; Q7L1Q6	AEVLSEEPILK	[K].AEVLSEEPILK.[W]		4.19381e-05	1	16	4.02906	1.38304	0.809144	3.17549	-2.64602	0.234497	0.818997	2.62655	2.518	1.33941	0.00250087	-0.108549	0.920282	0.999952
+pH fractionation/SP	Q92797	Q92797-2; Q92797	AEVLSFILEDVR	[K].AEVLSFILEDVR.[A]		4.19381e-05	1	2	2.75896	4.47985	1.18677	2.26006	1.72089	0.3078	0.819326	4.26514	6.12086	2.87024	0.595554	1.85572	0.334449	0.999952
+pH fractionation/SP	O94906	O94906-2; O94906	AEVLWLMGAK	[K].AEVLWLMGAK.[S]		4.19381e-05	1	12	-2.99848	-1.3682			1.63029		NA		-1.75982		1.1483			NA
+pH fractionation/SP	P09972	P09972	AEVNGLAAQGK	[R].AEVNGLAAQGK.[Y]		6.09156e-05	1	4	2.92573	1.52998	0.102161	0.756496	-1.39575	0.0339577	0.806601	1.50357	0.706353	0.534575	0.33343	-0.797214	0.0935205	0.999952
+pH fractionation/SP	Q9P2K5; Q9P2K5-2	Q9P2K5; Q9P2K5-4; Q9P2K5-2	AEVPGATGGDSPHLQPAEPPGEPR	[K].AEVPGATGGDSPHLQPAEPPGEPR.[R]		0	2	9	-3.79619	-3.13919			0.656996		NA	-3.54538	-0.0732702	0.689926	0.467363	3.47211	0.00625021	0.999952
+pH fractionation/SP	Q6P2E9	Q6P2E9; Q6P2E9-2	AEVQHQLHVAVGSLQESILAQVQR	[R].AEVQHQLHVAVGSLQESILAQVQR.[I]		0	1	7	1.37566	-0.109404	1.02226	1.11937	-1.48507	0.22095	0.818997	-1.31423	-0.609723	1.62451	0.203765	0.704506	0.602867	0.999952
+pH fractionation/SP	P60842	P60842-2; P60842	AEVQKLQMEAPHIIVGTPGR	[R].AEVQKLQMEAPHIIVGTPGR.[V]		0	1	1	2.63657	-0.415752	0.00255629		-3.05232		NA	-1.39563	-0.475843	1.51137	0.125914	0.919786	0.47472	0.999952
+pH fractionation/SP	O75369-8	O75369-9; O75369-5; O75369-2; O75369-8; O75369-7; O75369-4; O75369-6; O75369; O75369-3	AEVSIQNNK	[K].AEVSIQNNK.[D]		0.000275366	1	5	2.37353	2.04016	0.498237	1.54396	-0.33337	0.734146	0.920183	1.29957	-0.94349	1.97107	3.51186	-2.24306	0.389318	0.999952
+pH fractionation/SP	Q9H3K2	Q9H3K2	AEVSPMYGVQK	[R].AEVSPMYGVQK.[Y]		4.19381e-05	1	7	5.06091	4.82479	0.776605	0.405622	-0.236118	0.664949	0.901323	5.25996	5.12642	1.18949	0.431799	-0.133545	0.863855	0.999952
+pH fractionation/SP	P22314	P22314-2; P22314	AEVSQPR	[R].AEVSQPR.[L]		0.0046615	1	8	4.0086	-1.68078	1.17682	1.88756	-5.68937	0.0114206	0.671027	0.471307	-0.442918	2.42214	1.11242	-0.914226	0.663016	0.999952
+pH fractionation/SP	P52948	P52948-2; P52948-4; P52948; P52948-3; P52948-6; P52948-5	AEVTLDGVWPTDK	[K].AEVTLDGVWPTDK.[T]		3.35083e-05	1	3	5.19219	1.1031	0.451207	4.37911	-4.08909	0.177851	0.818997	1.54698	0.698191	3.28534	0.907229	-0.848791	0.756135	0.999952
+pH fractionation/SP	Q13769	Q13769	AEVTMGDPHQQTLAR	[K].AEVTMGDPHQQTLAR.[L]		0	1	9	2.48863	2.4831	0.438138	2.17279	-0.00552918	0.99676	0.999187	3.26592	3.62311	0.92986	0.49242	0.357186	0.588143	0.999952
+pH fractionation/SP	Q8TAT6-2	Q8TAT6; Q8TAT6-2	AEVVDEIAAK	[K].AEVVDEIAAK.[L]		6.09156e-05	1	7	1.48531	-1.52752	0.940219	0.72352	-3.01283	0.0325258	0.796619	0.313902	-0.279307	1.81613	0.903797	-0.593209	0.707102	0.999952
+pH fractionation/SP	Q13303-2	Q13303-5; Q13303-2; Q13303; Q13303-3; Q13303-4	AEVVLGNIIK	[K].AEVVLGNIIK.[K]		0.000177325	1	14	-1.05902	-2.62369	0.227976		-1.56467		NA	-4.32594		0.0236554				NA
+pH fractionation/SP	Q9H6F5	Q9H6F5; Q9H6F5-2	AEVVQVIR	[K].AEVVQVIR.[N]		0.000420983	1	12		2.04926					NA	1.05535	0.410369	0.725337	0.26302	-0.644978	0.358633	0.999952
+pH fractionation/SP	Q8IWZ3-6	Q8IWZ3-6; Q8IWZ3; Q8IWZ3-4	AEVVSLLLDR	[R].AEVVSLLLDR.[K]		4.19381e-05	1	5	4.07999	1.70472	0.320094	1.65321	-2.37527	0.0783735	0.818997	0.612172		2.1578				NA
+pH fractionation/SP	Q6P2E9	Q6P2E9	AEVWDLDMLR	[R].AEVWDLDMLR.[S]		4.19381e-05	1	12	2.79154	1.22221	0.112019	0.535481	-1.56933	0.00765929	0.62371	0.543564	0.722738	0.676846	0.240491	0.179174	0.753238	0.999952
+pH fractionation/SP	Q8IYS1	Q8IYS1	AEWEPPEAR	[R].AEWEPPEAR.[A]		0.000671208	1	10	3.08956	0.565154	0.949895	2.5748	-2.5244	0.186339	0.818997	0.62144	-0.664875	1.96068	1.44432	-1.28631	0.412013	0.999952
+pH fractionation/SP	Q9NRN7	Q9NRN7-2; Q9NRN7	AEWLLAVR	[R].AEWLLAVR.[S]		0.000542627	1	15	1.12291	1.68719			0.564283		NA	1.46809	1.37238	1.43045	0.66047	-0.0957016	0.937376	0.999952
+pH fractionation/SP	Q00059	TFAM_5419_I0; Q00059-2; TFAM_5419_E0; Q00059	AEWQVYK	[R].AEWQVYK.[E]		0.000836425	1	19		0.193496					NA	-0.425763	-0.900517	1.76884	0.273433	-0.474754	0.744077	0.999952
+pH fractionation/SP	Q00059	TFAM_5419_I0; Q00059-2; TFAM_5419_E0; Q00059	AEWQVYKEEISR	[R].AEWQVYKEEISR.[F]		0.000169063	1	6	-0.540537	-0.0427045	0.669982	1.85389	0.497832	0.684384	0.905459	1.40421	1.68723	0.920882	0.27024	0.283013	0.636412	0.999952
+pH fractionation/SP	P22234	P22234; P22234-2	AEYEGDGIPTVFVAVAGR	[K].AEYEGDGIPTVFVAVAGR.[S]		0	1	15	1.59503	0.12827	0.140807	1.61316	-1.46676	0.19175	0.818997	0.00632133	-0.204804	1.0048	0.458117	-0.211125	0.75716	0.999952
+pH fractionation/SP	Q9HCS7	Q9HCS7	AEYFDGSEPVQNR	[R].AEYFDGSEPVQNR.[V]		4.19381e-05	1	8	-0.773178	-2.88653	0.208834	0.184215	-2.11335	0.00140435	0.46169	-1.68685	-2.07881			-0.391964		NA
+pH fractionation/SP	P22413	P22413	AEYLHTWGGLLPVISK	[R].AEYLHTWGGLLPVISK.[L]		4.19381e-05	1	1	1.92485	3.34247	0.618295	0.43684	1.41762	0.0315723	0.79254	2.0371	1.05814	0.194376	1.62218	-0.978961	0.357959	0.999952
+pH fractionation/SP	Q2TB10	Q2TB10	AEYNLTACK	[K].AEYNLTACK.[C]	1xCarbamidomethyl [C8]	0.000579178	1	2		-1.23626		1.37044			NA	-1.44691	-3.98019	0.128462	3.37414	-2.53328	0.399873	0.999952
+pH fractionation/SP	P30084	P30084	AFAAGADIK	[K].AFAAGADIK.[E]		0.000387362	1	9	-1.50898	-2.34693	0.70697	1.72897	-0.837951	0.480548	0.85396	-0.883534	-1.27973	0.907293	0.620354	-0.396194	0.56624	0.999952
+pH fractionation/SP	P48643	P48643-2; P48643	AFADALEVIPMALSENSGMNPIQTMTEVR	[R].AFADALEVIPMALSENSGMNPIQTMTEVR.[A]		0	1	2	-0.701782	-0.47363	0.498088	1.46808	0.228152	0.811366	0.945116	-0.374502	-0.382207	0.923294	1.17631	-0.0077058	0.993306	0.999952
+pH fractionation/SP	P50991	P50991; P50991-2	AFADAMEVIPSTLAENAGLNPISTVTELR	[R].AFADAMEVIPSTLAENAGLNPISTVTELR.[N]		0	1	9	-0.369093	-0.429816	1.08743	0.193471	-0.0607231	0.928716	0.980975	0.576311	0.438737	0.546586	0.0453634	-0.137575	0.756702	0.999952
+pH fractionation/SP	P50991	P50991; P50991-2	AFADAMEVIPSTLAENAGLNPISTVTELR	[R].AFADAMEVIPSTLAENAGLNPISTVTELR.[N]	1xOxidation [M6]	0	1	6	2.41588	1.30168	0.363548	0.470543	-1.1142	0.0315098	0.79254	0.605215	1.2148	1.77964	0.0919075	0.609586	0.58539	0.999952
+pH fractionation/SP	Q8IWZ3-6; O75179	Q8IWZ3-6; Q8IWZ3; O75179-3; O75179; O75179-4; O75179-5; Q8IWZ3-5; O75179-7; Q8IWZ3-2; O75179-6; Q8IWZ3-4; O75179-2	AFADPEVLR	[K].AFADPEVLR.[R]		0.000346548	2	6	1.34999	0.106077	0.115014	1.54651	-1.24391	0.237077	0.818997	-1.12276	-1.94701	2.36895	0.547665	-0.824249	0.676361	0.999952
+pH fractionation/SP	P15428	P15428; P15428-5; P15428-4; P15428-2	AFAEALLLK	[R].AFAEALLLK.[G]		0.00154515	1	3	-3.66152	0.0738962	0.164582	3.31015	3.73541	0.122653	0.818997	2.83266	3.02328	1.13854	0.907199	0.190625	0.846509	0.999952
+pH fractionation/SP	P42704	P42704	AFAETHIK	[K].AFAETHIK.[G]		0.000413649	1	9	-1.14446	-0.151381	0.809893	2.93614	0.993079	0.592057	0.881409	-0.358623	-0.559062	2.44676		-0.200439		NA
+pH fractionation/SP	Q9H000	Q9H000; Q9H000-2	AFAFQASQDK	[K].AFAFQASQDK.[V]		0.00115343	1	2	1.02543	2.77382	0.419309	2.66428	1.74839	0.324354	0.82068	4.6405	5.72015	3.1257	0.959914	1.07965	0.597989	0.999952
+pH fractionation/SP	P22102	P22102	AFAHITGGGLLENIPR	[K].AFAHITGGGLLENIPR.[V]		0	1	12	-0.217719	-0.86863	0.151966	0.789363	-0.650911	0.23341	0.818997	-2.00644	-1.40434	1.19943	0.774075	0.602105	0.505541	0.999952
+pH fractionation/SP	Q9H2U2-2	Q9H2U2-6; Q9H2U2; Q9H2U2-4; Q9H2U2-2; Q9H2U2-3	AFALEVIK	[K].AFALEVIK.[S]		0.000776576	1	9	3.20508	1.96827	0.611882	1.46469	-1.23681	0.261606	0.818997	-0.0953319	1.18503	2.58278	0.482172	1.28036	0.556755	0.999952
+pH fractionation/SP	Q14166	Q14166	AFALNDLDDYEK	[R].AFALNDLDDYEK.[H]		3.35083e-05	1	9	2.28793	1.06262	0.305561	1.82813	-1.22532	0.31605	0.820259	1.01504	1.05149	1.35274	1.41005	0.0364484	0.975774	0.999952
+pH fractionation/SP	Q15365; Q15366-2	Q15366-3; Q15366-7; Q15366-6; Q15366-4; Q15366; Q15365; Q15366-8; Q15366-5; Q15366-2	AFAMIIDK	[K].AFAMIIDK.[L]		0.000192563	2	36	-0.10991	-1.35736	0.358636	0.806599	-1.24745	0.0706225	0.818997	-0.69484	-1.58269	0.248821	0.596653	-0.887854	0.191586	0.999952
+pH fractionation/SP	Q15365; Q15366-2	Q15366-3; Q15366-7; Q15366-6; Q15366-4; Q15366; Q15365; Q15366-8; Q15366-5; Q15366-2	AFAMIIDK	[K].AFAMIIDK.[L]	1xOxidation [M4]	0.00115343	2	9	3.71699	3.37604	0.353569	1.77556	-0.34095	0.760632	0.928471	4.32621	3.86702	1.15881	0.468202	-0.459189	0.559132	0.999952
+pH fractionation/SP	P58317	P58317	AFATSSQLIEHIR	[K].AFATSSQLIEHIR.[T]		3.35083e-05	1	1		-1.05004		2.56248			NA	2.02152	0.934845	0.727535	1.17921	-1.08667	0.339499	0.999952
+pH fractionation/SP	O95373	O95373	AFAVGVQQVLLK	[K].AFAVGVQQVLLK.[V]		3.35083e-05	1	8	-1.83446	-1.15619	0.363442	2.53828	0.678266	0.744278	0.923573	2.62316	2.02282	0.151539	1.02533	-0.60034	0.491619	0.999952
+pH fractionation/SP	Q14692	Q14692	AFAVQSAVR	[K].AFAVQSAVR.[M]		0.000169063	1	10		0.75244					NA	-0.571352	-0.0817193	1.03498	0.763139	0.489633	0.578422	0.999952
+pH fractionation/SP	P49407	P49407; P49407-2	AFCAENLEEK	[K].AFCAENLEEK.[I]	1xCarbamidomethyl [C3]	0.00228826	1	1	-1.10232		0.479407				NA	-1.75989						NA
+pH fractionation/SP	P54577	P54577	AFCEPGNVENNGVLSFIK	[K].AFCEPGNVENNGVLSFIK.[H]	1xCarbamidomethyl [C3]	0	1	3	2.08478	0.810294	0.433681	1.32488	-1.27449	0.196231	0.818997	1.44894	-0.186349			-1.63529		NA
+pH fractionation/SP	O43847-2	O43847-2; O43847	AFDCPETEYPVK	[K].AFDCPETEYPVK.[I]	1xCarbamidomethyl [C4]	3.35083e-05	1	14	1.1407	-0.501427	0.401758	2.24108	-1.64212	0.279694	0.819124	-0.926597	-0.933893	2.68594	0.639152	-0.00729649	0.996409	0.999952
+pH fractionation/SP	P06400	P06400	AFDFYK	[K].AFDFYK.[V]		0.00336824	1	17	1.21095	0.0389155	0.227557	1.86079	-1.17203	0.339776	0.82472		-1.08236		0.73213			NA
+pH fractionation/SP	Q8N1F7	Q8N1F7-2; Q8N1F7	AFDIIER	[R].AFDIIER.[L]		0.000874531	1	26	-1.92385	-1.04947	0.58904	1.14048	0.874372	0.303441	0.819326	-0.120665	1.67752	1.35203	2.88666	1.79818	0.383854	0.999952
+pH fractionation/SP	Q9Y3D9	Q9Y3D9	AFDLFNPNFK	[R].AFDLFNPNFK.[S]		4.19381e-05	1	4	-0.968526	0.539176	0.750448	2.28303	1.5077	0.338409	0.824177	0.986986	0.720971	2.30586	0.261587	-0.266015	0.887182	0.999952
+pH fractionation/SP	O96000	O96000-2; O96000	AFDLIVDRPVTLVR	[K].AFDLIVDRPVTLVR.[E]		0.000177325	1	1	-1.74537	-0.0377008	0.244765	2.93697	1.70767	0.372356	0.829466	1.13487	2.38875	2.92122	0.00995828	1.25388	0.605061	0.999952
+pH fractionation/SP	Q86UE8	Q86UE8; Q86UE8-2; Q86UE8-3	AFDLTEQR	[K].AFDLTEQR.[Y]		0.00305121	1	1	0.624175	0.899754	0.379321	0.666166	0.275579	0.584188	0.879931	-1.00486	-0.735346	1.97202	0.867438	0.269518	0.839057	0.999952
+pH fractionation/SP	Q96G03	Q96G03-2; Q96G03	AFDLVPPEAVPEQK	[K].AFDLVPPEAVPEQK.[D]		4.19381e-05	1	14	-1.10562	0.0123322	0.117897	1.67558	1.11795	0.313203	0.820259	0.586313	2.08071	1.80978	0.753843	1.4944	0.257227	0.999952
+pH fractionation/SP	Q96G03	Q96G03-2; Q96G03	AFDLVPPEAVPEQKDPDPEFPTVK	[K].AFDLVPPEAVPEQKDPDPEFPTVK.[Y]		0.000360009	1	2	-0.98624	1.54149	1.71702	0.620978	2.52773	0.151598	0.818997	-1.42494	-3.24916	4.30067		-1.82421		NA
+pH fractionation/SP	Q9H3G5	Q9H3G5	AFDMINR	[R].AFDMINR.[F]		0.00155688	1	4	-3.2235	-1.23355	1.09205	3.50337	1.98995	0.400781	0.835149	1.32445	2.5734	3.04019	0.838559	1.24896	0.530443	0.999952
+pH fractionation/SP	O14908	O14908-2; O14908	AFDMISQR	[K].AFDMISQR.[S]		0.00522292	1	3	-1.14546	0.479025	0.922408	0.757564	1.62449	0.133628	0.818997	-2.43512	-1.17321	1.54926	2.21435	1.26192	0.54236	0.999952
+pH fractionation/SP	Q9UDW1	Q9UDW1	AFDQGADAIYDHINEGK	[R].AFDQGADAIYDHINEGK.[L]		0	1	2	-2.19658		0.134315				NA							NA
+pH fractionation/SP	Q16891-2	Q16891-4; Q16891-2; Q16891-3; Q16891	AFDSAVAK	[R].AFDSAVAK.[A]		0.000928578	1	8	-1.94969	-2.68921	0.280415		-0.739525		NA	-4.00749	-3.67627	0.857443		0.331214		NA
+pH fractionation/SP	P53396	P53396-3; P53396; P53396-2	AFDSGIIPMEFVNK	[K].AFDSGIIPMEFVNK.[M]		0	1	13	-0.209768	0.391336	0.655727	0.954012	0.601104	0.454335	0.84745	-1.44641	-1.35699	1.16217	1.32944	0.0894254	0.943644	0.999952
+pH fractionation/SP	P53396	P53396-3; P53396; P53396-2	AFDSGIIPMEFVNK	[K].AFDSGIIPMEFVNK.[M]	1xOxidation [M9]	4.19381e-05	1	2	1.70895	2.59638	0.395683	1.22473	0.887431	0.298356	0.819326	2.64416	3.08818	0.902089	0.0117555	0.444024	0.556205	0.999952
+pH fractionation/SP	P49327	P49327	AFDTAGNGYCR	[K].AFDTAGNGYCR.[S]	1xCarbamidomethyl [C10]	4.19381e-05	1	5	-0.424779	-0.271133	0.834886	3.78125	0.153646	0.945967	0.98474	2.86288	3.48746	2.34133	0.449849	0.624571	0.673543	0.999952
+pH fractionation/SP	P49116	P13056-3; P49116; P49116-2; P13056-2; P13056	AFDTLAK	[R].AFDTLAK.[A]		0.00453601	1	2		-0.677855		2.81558			NA	1.32762	-0.312101	1.05283	1.53342	-1.63972	0.287313	0.999952
+pH fractionation/SP	Q9BTC0	Q9BTC0	AFDTQLVER	[R].AFDTQLVER.[G]		0.000332976	1	4	0.418368	0.954749	0.219602	0.573601	0.536381	0.204927	0.818997	0.982714	-1.35006			-2.33278		NA
+pH fractionation/SP	Q13415	Q13415	AFEDDAIQLVAR	[K].AFEDDAIQLVAR.[K]		3.35083e-05	1	3	-0.396634	1.8042	0.864433	3.27213	2.20083	0.323024	0.820259	3.07222	3.95725	1.46011	0.884077	0.885028	0.508977	0.999952
+pH fractionation/SP	Q9NTK5	Q9NTK5-3; Q9NTK5	AFEDDDITHVEGSVDPIR	[R].AFEDDDITHVEGSVDPIR.[D]		0	1	19	-2.16151		1.30507				NA	-2.00332	-1.90777	1.23778	0.829937	0.095554	0.922064	0.999952
+pH fractionation/SP	Q9Y6E2	Q9Y6E2; Q9Y6E2-2	AFEDEMK	[K].AFEDEMK.[K]		0.00133186	1	6	4.0973	3.04756	0.246397		-1.04974		NA	-3.34958	-3.14525			0.20433		NA
+pH fractionation/SP	Q01082	Q01082-2; Q01082; Q01082-3	AFEDEMSGR	[R].AFEDEMSGR.[S]		0.000246334	1	11	-1.10825	-0.493802	1.37723	1.78519	0.614448	0.661512	0.900152	-3.03314	0.450227		0.728794	3.48337		NA
+pH fractionation/SP	Q01082	Q01082-2; Q01082; Q01082-3	AFEDEMSGR	[R].AFEDEMSGR.[S]	1xOxidation [M6]	0.0019417	1	1	-1.40103	-2.41646	1.40034		-1.01543		NA	-1.01515	-3.96982	1.61429	3.6552	-2.95467	0.284213	0.999952
+pH fractionation/SP	O95163	O95163	AFEDTLQLMER	[K].AFEDTLQLMER.[S]		4.19381e-05	1	6	0.540974	1.24285	0.233658	0.795691	0.701875	0.216545	0.818997	1.39759	2.10943	0.665191	0.466554	0.711833	0.203754	0.999952
+pH fractionation/SP	P55072	P55072	AFEEAEK	[K].AFEEAEK.[N]		0.00270088	1	8	0.993886	-3.25063	0.183048	2.81821	-4.24451	0.0598487	0.818997	0.232326	-0.371271	1.11831	1.33834	-0.603597	0.618937	0.999952
+pH fractionation/SP	P55072	P55072	AFEEAEKNAPAIIFIDELDAIAPK	[K].AFEEAEKNAPAIIFIDELDAIAPK.[R]		0	1	2	0.463974	1.22811	0.282077	0.561846	0.764135	0.103042	0.818997	1.68205	0.590494	1.31199	1.4906	-1.09156	0.394963	0.999952
+pH fractionation/SP	O43818	O43818	AFEEDQVAGR	[R].AFEEDQVAGR.[L]		4.19381e-05	1	1	-3.38799	-0.0772949		2.44942	3.3107		NA	-0.453914	1.0076	2.87965	0.770334	1.46152	0.4436	0.999952
+pH fractionation/SP	P11169	P11169; Q8TDB8-3; Q8TDB8-2; Q8TDB8; Q8TDB8-4; Q8TDB8-5	AFEGQAHGADR	[R].AFEGQAHGADR.[S]		4.19381e-05	1	4		-0.272632					NA		-0.80259		1.25219			NA
+pH fractionation/SP	Q9H4A4	Q9H4A4	AFELLHLHLDLR	[R].AFELLHLHLDLR.[A]		0.00397319	1	1		2.41107					NA	0.725269	2.93544	2.62498	0.0199533	2.21017	0.340799	0.999952
+pH fractionation/SP	P11766	P11766	AFELMHSGK	[K].AFELMHSGK.[S]		4.19381e-05	1	28	-2.04072	-1.97748	1.5642	0.726385	0.0632347	0.952913	0.986385	0.296144	-1.32968	1.05585	1.17659	-1.62582	0.283053	0.999952
+pH fractionation/SP	Q8WWI1-3	Q8WWI1-4; Q8WWI1-3; Q8WWI1; Q8WWI1-2	AFENLLGQALTK	[K].AFENLLGQALTK.[A]		0.00557565	1	1	2.93951	-0.998942	1.15457		-3.93845		NA	-3.17515		2.58881				NA
+pH fractionation/SP	P49189	P49189	AFEPATGR	[K].AFEPATGR.[V]		0.000874531	1	8	2.01521	-0.244184	0.0629414	0.53817	-2.2594	0.00194919	0.50401	-0.628498	-1.73289	0.431769	2.66835	-1.10439	0.518208	0.999952
+pH fractionation/SP	P49327	P49327	AFEVSENGNLVVSGK	[R].AFEVSENGNLVVSGK.[V]		0	1	3	-2.89032		2.71676				NA		-2.12667		0.732579			NA
+pH fractionation/SP	Q14697; Q14697-2	Q14697; Q14697-2	AFFAGSQR	[R].AFFAGSQR.[F]		0.00117885	2	12	1.40881	0.731787	1.01322	2.11472	-0.677024	0.643281	0.895287	0.764141	-0.856731	3.53364	0.211858	-1.62087	0.583689	0.999952
+pH fractionation/SP	P54619-3	P54619-2; P54619-3; P54619	AFFALVTNGVR	[K].AFFALVTNGVR.[A]		0.00198804	1	1		2.17354					NA	1.84787	2.10531	2.5748	0.172861	0.257445	0.900731	0.999952
+pH fractionation/SP	O15091	KIAA0391_6476_I2; KIAA0391_6476_E2; O15091-2; O15091; O15091-4	AFFDFGK	[K].AFFDFGK.[D]		0.00321697	1	4	-1.67445	-1.61162	0.154259	0.78917	0.0628325	0.922098	0.978871	-2.21191	-2.20228	1.20038	1.9567	0.00963613	0.994812	0.999952
+pH fractionation/SP	P55786	P55786-2; P55786	AFFESHPAPSAER	[K].AFFESHPAPSAER.[T]		3.35083e-05	1	13	-0.214816	-0.129846	0.279422	1.78631	0.0849697	0.939035	0.982736	-1.09929	-0.588814	2.24361	0.559651	0.510479	0.711232	0.999952
+pH fractionation/SP	Q9H4A4	RNPEP_6865_I0; RNPEP_6865_E0; Q9H4A4	AFFPCFDTPAVK	[R].AFFPCFDTPAVK.[Y]	1xCarbamidomethyl [C5]	4.19381e-05	1	22	1.57144	1.04508	0.445653	2.53897	-0.526368	0.741437	0.922692	-0.50686	0.0651993	2.12382	0.794819	0.572059	0.684709	0.999952
+pH fractionation/SP	Q9UQ80	Q9UQ80; Q9UQ80-2	AFFSEVER	[R].AFFSEVER.[R]		0.000332976	1	38	0.0104216	-0.506079	0.241975	1.06476	-0.5165	0.458619	0.847833	-1.27998	-0.956633	0.812276	0.430759	0.323342	0.651408	0.999952
+pH fractionation/SP	Q9UQ80	Q9UQ80; Q9UQ80-2	AFFSEVERR	[R].AFFSEVERR.[F]		0.000542627	1	4	-3.01641	-1.92651	1.0208	0.9531	1.08991	0.247849	0.818997	-3.2371	-3.83684	1.88093		-0.599738		NA
+pH fractionation/SP	Q92608	Q92608	AFFTEEYVR	[K].AFFTEEYVR.[D]		8.08306e-05	1	19	-2.82437	-1.60957	0.827748	1.67352	1.2148	0.322786	0.820259	-1.48457	-1.1056	1.29637	0.924819	0.378973	0.701327	0.999952
+pH fractionation/SP	P08575	P08575; P08575-4	AFGDVVVK	[R].AFGDVVVK.[I]		0.000849071	1	13	-1.24018	-1.43658	1.32792	0.278101	-0.196394	0.856933	0.960182	-3.70337	-2.19181	0.962735	0.0976059	1.51155	0.157798	0.999952
+pH fractionation/SP	P31040	P31040-2; P31040	AFGGQSLK	[R].AFGGQSLK.[F]		0.000877399	1	10	-0.454419	-1.02185	1.25798	0.981534	-0.567427	0.664935	0.901323	-1.61185	-4.44835	0.47221	3.71597	-2.83651	0.249253	0.999952
+pH fractionation/SP	P25325-2	P25325-2; P25325	AFGHHAVSLLDGGLR	[R].AFGHHAVSLLDGGLR.[H]		0	1	5	-2.35445	-3.04164	0.155973	2.59562	-0.687191	0.670903	0.903264	-0.969973	-1.87643	0.742652	1.02846	-0.906459	0.283532	0.999952
+pH fractionation/SP	P07954	P07954-2; P07954	AFGILKR	[K].AFGILKR.[A]		0.00980225	1	1	0.272284	-3.96307	0.585956		-4.23536		NA		-0.798497		0.261891			NA
+pH fractionation/SP	P06493	P06493; CDC2_1812_I1	AFGIPIR	[R].AFGIPIR.[V]		0.00163859	1	26	0.305917	-1.40071	1.09706	1.72025	-1.70663	0.220978	0.818997	-0.636556	-1.3098	0.487245	2.12138	-0.673246	0.606956	0.999952
+pH fractionation/SP	P21333	P21333; P21333-2	AFGPGLQGGSAGSPAR	[K].AFGPGLQGGSAGSPAR.[F]		0	1	35	0.0632849	0.118268	0.808434	2.08699	0.0549827	0.968099	0.99054	0.585129	-1.96382		0.855194	-2.54894		NA
+pH fractionation/SP	P18583-5; P18583-3	P18583; P18583-4; P18583-6; P18583-5; P18583-10; P18583-9; P18583-2; P18583-3; P18583-7; KIAA1019_1056_I1; P18583-8	AFGPSETNESPAVVLEPPVVSMEVSEPHILETLKPATK	[R].AFGPSETNESPAVVLEPPVVSMEVSEPHILETLKPATK.[T]		0	2	2	-3.10362	-1.52604		1.57298	1.57758		NA	-2.70337	-2.90356	0.364485	0.395034	-0.20019	0.650972	0.999952
+pH fractionation/SP	P23588	P23588; P23588-2	AFGSGYR	[R].AFGSGYR.[R]		0.00766079	1	4	3.96047	3.77285	1.32043	0.0685678	-0.187618	0.861077	0.961562	0.338288		0.228942				NA
+pH fractionation/SP	Q13620	Q13620-1; Q13620; Q13620-3	AFGSTIVINPEK	[K].AFGSTIVINPEK.[D]		4.19381e-05	1	10	-0.222302	0.0477541	0.242309	0.667728	0.270056	0.546194	0.869184	0.77457	0.780843	0.22642	0.079524	0.00627241	0.966061	0.999952
+pH fractionation/SP	Q13029	Q13029-2; PRDM2_5557_I2; Q13029; Q13029-3; Q13029-5	AFGTQINR	[K].AFGTQINR.[R]		0.00257628	1	4	-2.6879	-2.95892		1.62987	-0.271017		NA	-0.811566	-0.336483	1.28189	0.654304	0.475083	0.608474	0.999952
+pH fractionation/SP	P24941	P24941; P24941-2	AFGVPVR	[R].AFGVPVR.[T]		0.00510546	1	1	3.37259	3.19821	0.37531	2.22198	-0.174389	0.899845	0.972661	1.67632	0.0450541	1.19031	1.76059	-1.63126	0.254443	0.999952
+pH fractionation/SP	P84103	P84103-2; P84103	AFGYYGPLR	[R].AFGYYGPLR.[S]		0.000169063	1	57	-0.840194	-0.757503	0.480809	1.3051	0.0826909	0.940651	0.983152	-1.17514	-0.288147	0.251031		0.886995		NA
+pH fractionation/SP	Q9BPX5	Q9BPX5	AFHAALR	[R].AFHAALR.[N]		0.00331149	1	2	-0.434816	0.728989	1.49489	1.78995	1.1638	0.436142	0.841644	1.32297	0.90218	0.535063	0.149233	-0.420792	0.376713	0.999952
+pH fractionation/SP	O75191	O75191-2; O75191	AFHGLAGGTDVPFSEVVK	[R].AFHGLAGGTDVPFSEVVK.[L]		4.19381e-05	1	2	-2.18076	-2.10205	0.816713	3.54727	0.0787082	0.97192	0.991746	0.370413	1.00936	1.43362	0.239018	0.638952	0.597549	0.999952
+pH fractionation/SP	P17987	P17987	AFHNEAQVNPER	[R].AFHNEAQVNPER.[K]		0	1	37	2.0366	3.13262	0.602464	4.08634	1.09602	0.652583	0.898345	5.18367	5.65662	2.95238	1.86033	0.472951	0.825932	0.999952
+pH fractionation/SP	P17987	P17987	AFHNEAQVNPERK	[R].AFHNEAQVNPERK.[N]		3.35083e-05	1	4	-2.93559	-2.25534	1.52757	0.819101	0.680257	0.533962	0.865736	-0.537346	-2.30893		0.945982	-1.77159		NA
+pH fractionation/SP	O95864	O95864-2; O95864-3; O95864-4; O95864	AFHPDLEFVGK	[R].AFHPDLEFVGK.[F]		4.19381e-05	1	22	6.78696	5.7024	1.16771	0.573875	-1.08456	0.222291	0.818997	6.53078	7.29124	0.442333	0.473079	0.760458	0.11174	0.999952
+pH fractionation/SP	Q9H3P7	Q9H3P7	AFHPTYEEK	[K].AFHPTYEEK.[L]		0.000224101	1	6	-1.59532	-2.34322	0.339163	2.05453	-0.747902	0.661977	0.900181	0.165224						NA
+pH fractionation/SP	Q8N1K5-4	Q8N1K5-2; Q8N1K5-4; Q8N1K5; Q8N1K5-3	AFHSPHDK	[K].AFHSPHDK.[L]		0.000246334	1	9	2.85591	-0.839481	0.743301	3.46829	-3.69539	0.145476	0.818997	1.76882	-0.757576	0.775085	3.6113	-2.5264	0.301707	0.999952
+pH fractionation/SP	P23634	P23634-8; P23634-6; ATP2B4_1817_E0; P23634; P23634-7	AFHSSLHESIQKPYNQK	[K].AFHSSLHESIQKPYNQK.[S]		0.00376437	1	2	-0.205829	-0.333883	1.26891		-0.128054		NA	-2.37416	-2.87234	0.951692		-0.498183		NA
+pH fractionation/SP	Q92619-2	Q92619; Q92619-2	AFHYESNNDLEK	[K].AFHYESNNDLEK.[Q]		0.00030511	1	2	-0.964347	-2.77535	0.49917	2.44693	-1.811	0.270058	0.818997	-2.508	-2.78372	2.58107	0.148983	-0.27572	0.89521	0.999952
+pH fractionation/SP	P23229	P23229-2; P23229-6; P23229-5; P23229-9; P23229-4; P23229-7; P23229; P23229-3	AFIDVTAAAENIR	[R].AFIDVTAAAENIR.[L]		0.000420983	1	1		-0.306902		2.25515			NA	1.49297	1.63174	0.633561	0.51153	0.138771	0.802003	0.999952
+pH fractionation/SP	Q9NVZ3-2	Q9NVZ3; Q9NVZ3-3; Q9NVZ3-2; Q9NVZ3-4	AFIGIGFGDR	[R].AFIGIGFGDR.[G]		0.00107635	1	3	-3.35111	-2.07607	1.30765	0.766229	1.27504	0.356237	0.827361	-2.42807	-1.85203	0.260683		0.576033		NA
+pH fractionation/SP	P47897	P47897-2; P47897	AFIHWVSQPLMCEVR	[K].AFIHWVSQPLMCEVR.[L]	1xCarbamidomethyl [C12]	0	1	5	-2.30487	-1.00806	1.12176	2.03164	1.29682	0.387925	0.831888	-0.911491	0.226955	0.668662	0.86465	1.13845	0.145558	0.999952
+pH fractionation/SP	Q9HAB8	Q9HAB8; Q9HAB8-2	AFIISFK	[K].AFIISFK.[L]		0.00223086	1	3	1.00698	-2.19692	0.496158		-3.2039		NA	-1.0511	0.707726		0.940421	1.75883		NA
+pH fractionation/SP	P30566	P30566-2; P30566	AFIITGQTYTR	[R].AFIITGQTYTR.[K]		4.19381e-05	1	12	-1.26859	-1.94248	1.46816	2.24846	-0.673891	0.68623	0.906232	-1.60173	-0.693815	0.646658		0.907912		NA
+pH fractionation/SP	Q15029	Q15029-2; Q15029-3; Q15029	AFIPAIDSFGFETDLR	[K].AFIPAIDSFGFETDLR.[T]		0	1	19	-2.94323	-2.30266	0.182575	0.404046	0.640571	0.135852	0.818997	-0.0658524	1.75978	1.89769	0.361173	1.82564	0.176991	0.999952
+pH fractionation/SP	Q16656-4	Q16656-3; Q16656; Q16656-2; Q16656-4	AFIPEMLK	[R].AFIPEMLK.[Y]		0.000542627	1	6	0.384531	-0.606242	0.361758	2.40247	-0.990773	0.518952	0.861759	0.232888	-1.86147		0.844172	-2.09436		NA
+pH fractionation/SP	Q8NHP8	Q8NHP8	AFIPGGPSPGSR	[K].AFIPGGPSPGSR.[V]		0.00154515	1	3	-2.29897	-0.250711	0.735774	2.39898	2.04826	0.367647	0.829318	-5.22483	-2.05064	0.342597	1.96452	3.17419	0.12054	0.999952
+pH fractionation/SP	P14735	P14735; P14735-2	AFIPQLLSR	[K].AFIPQLLSR.[L]		0.000398881	1	9	-3.149	-2.59747	2.73235	0.717299	0.551535	0.80838	0.943964	-2.2114	-2.46225	0.683308	1.05719	-0.250852	0.804563	0.999952
+pH fractionation/SP	Q14008	Q14008-2; Q14008; Q14008-3	AFISNVK	[K].AFISNVK.[T]		0.00376437	1	4	-0.654303	-1.89924	1.01433	1.5264	-1.24494	0.304604	0.819326	-1.5526	-2.68871	1.28397	0.742063	-1.13611	0.255214	0.999952
+pH fractionation/SP	P52272	P52272-2; P52272	AFITNIPFDVK	[R].AFITNIPFDVK.[W]		4.19381e-05	1	42	1.24846	1.82872	0.357592	1.11634	0.580255	0.439566	0.842931	2.51347	2.5298	0.713704	0.526461	0.0163348	0.976079	0.999952
+pH fractionation/SP	Q9UBB5	Q9UBB5	AFIVTDEDIR	[K].AFIVTDEDIR.[K]		0.000169063	1	5		-1.79337					NA	-2.00802	0.585083	1.81266	1.31514	2.5931	0.154475	0.999952
+pH fractionation/SP	Q9NYK5-2	Q9NYK5; Q9NYK5-2	AFKDEYMVNLVR	[R].AFKDEYMVNLVR.[A]		0.000177325	1	2	4.00985	3.79233	0.295586		-0.217523		NA	-1.42699						NA
+pH fractionation/SP	P61011	P61011-2; P61011	AFKDKVDVASVIVTK	[K].AFKDKVDVASVIVTK.[L]		4.19381e-05	1	1	0.352252	-3.98328	0.316651		-4.33553		NA	-3.0685	-1.63608	1.7179	0.269849	1.43242	0.226821	0.999952
+pH fractionation/SP	P30520	P30520	AFKELPVNAQNYVR	[R].AFKELPVNAQNYVR.[F]		0.000152083	1	1		-1.57093		1.33528			NA	0.672172	-1.05403		0.761962	-1.72621		NA
+pH fractionation/SP	P05388	P05388; P05388-2	AFLADPSAFVAAAPVAAATTAAPAAAAAPAK	[K].AFLADPSAFVAAAPVAAATTAAPAAAAAPAK.[V]		0	1	24	0.048989	0.185965	0.834974	0.850981	0.136976	0.851969	0.958443	-1.14381	-1.48614	1.79009	1.76063	-0.342327	0.824917	0.999952
+pH fractionation/SP	P05388	P05388; P05388-2	AFLADPSAFVAAAPVAAATTAAPAAAAAPAKVEAK	[K].AFLADPSAFVAAAPVAAATTAAPAAAAAPAKVEAK.[E]		0	1	6	-0.932943	-0.156225	0.589705	0.154365	0.776718	0.0919353	0.818997	0.188379	0.950679	1.76801	1.30617	0.7623	0.580445	0.999952
+pH fractionation/SP	Q9UPN3; Q9UPN3-5	Q9UPN3; Q9UPN3-5; Q9UPN3-3; Q9UPN3-4; Q9UPN3-2	AFLAELEQNSPK	[K].AFLAELEQNSPK.[I]		3.35083e-05	2	2	-2.01089	-0.153712	0.0578359	2.95619	1.85717	0.461239	0.849261	2.72522	1.6156	0.309619	0.329734	-1.10963	0.0328606	0.999952
+pH fractionation/SP	P09211	P09211	AFLASPEYVNLPINGNGK	[K].AFLASPEYVNLPINGNGK.[Q]		0	1	13	-2.37826	-2.28906	1.5647	1.05257	0.0891929	0.938644	0.982736							NA
+pH fractionation/SP	P09211	P09211	AFLASPEYVNLPINGNGKQ	[K].AFLASPEYVNLPINGNGKQ.[-]		0	1	2	-0.0868991	1.02111	0.886775	0.93914	1.10801	0.211519	0.818997	1.11733	1.69138	1.5669	0.999417	0.574046	0.621014	0.999952
+pH fractionation/SP	Q96MX0	Q96MX0-2; Q96MX0	AFLCSLK	[R].AFLCSLK.[G]	1xCarbamidomethyl [C4]	0.0022992	1	7	2.30508	1.4115	0.701868	1.26117	-0.893579	0.343958	0.824979	0.140584	0.163509	1.63432	0.65698	0.0229253	0.983095	0.999952
+pH fractionation/SP	Q12931	Q12931; Q12931-2	AFLDALQNQAEASSK	[K].AFLDALQNQAEASSK.[I]		0	1	10	-0.513044	-1.11566	0.681751	1.65317	-0.602619	0.592296	0.881425	-1.34143	-3.17155	1.04686	1.84966	-1.83012	0.210112	0.999952
+pH fractionation/SP	Q92888-3	Q92888-3; Q92888; ARHGEF1_3146_I0	AFLDFYHSFLEK	[K].AFLDFYHSFLEK.[T]		3.35083e-05	1	5	-3.36046	-0.500036	3.63782	6.25123	2.86042	0.632231	0.892542	-3.75736	3.04097	1.27508		6.79832		NA
+pH fractionation/SP	P78344	P78344-2; P78344	AFLDNGPK	[K].AFLDNGPK.[T]		0.000420983	1	9	1.11139	1.61191	0.405801	2.13531	0.500521	0.710374	0.912503	2.45783	3.13118	2.50493	0.350814	0.673345	0.668691	0.999952
+pH fractionation/SP	O15294	O15294-4; O15294; O15294-2; O15294-3	AFLDSLPDVK	[K].AFLDSLPDVK.[I]		0.000224101	1	5	2.09268	2.33243	0.746647	1.97868	0.239751	0.852249	0.958493	0.533221	3.70986	4.33238	0.432571	3.17663	0.398811	0.999952
+pH fractionation/SP	Q9NXG2	Q9NXG2	AFLEDMK	[K].AFLEDMK.[K]		0.00224153	1	8	-1.94541	-1.48527	0.890164	1.1914	0.460137	0.649133	0.897322	-2.17289	-1.34011	0.919032		0.832781		NA
+pH fractionation/SP	P53041	P53041	AFLEENNLDYIIR	[K].AFLEENNLDYIIR.[S]		0	1	3	-1.50109	-1.40326	0.802716	2.04855	0.0978308	0.94231	0.983619	-1.83952	-2.7411	2.15527	2.77649	-0.901578	0.679817	0.999952
+pH fractionation/SP	Q96BY6-3	Q96BY6; Q96BY6-3	AFLEETNAK	[R].AFLEETNAK.[K]		0.00376437	1	2	-3.50236	-0.883533	0.599145	2.28298	2.61883	0.227444	0.818997	0.165006	1.55451	3.61919	0.509702	1.38951	0.5462	0.999952
+pH fractionation/SP	Q96ST3	Q96ST3	AFLEILHTYQK	[K].AFLEILHTYQK.[E]		4.19381e-05	1	2							NA	-1.78508	-1.527	0.0628427		0.258083		NA
+pH fractionation/SP	Q8NCD3	Q8NCD3-2; Q8NCD3-3; Q8NCD3	AFLEVNRPQIHK	[K].AFLEVNRPQIHK.[L]		0.000877399	1	3	1.81011	-0.01742	0.707536		-1.82753		NA	-2.324	-2.39836	2.86575		-0.0743596		NA
+pH fractionation/SP	Q9HB90	Q9NQL2-2; Q9HB90; Q9NQL2	AFLFDVVSK	[K].AFLFDVVSK.[I]		0.000246334	1	9	2.01077	2.60694	0.699166	0.724758	0.59617	0.363139	0.829318	2.1526	2.351	0.980863	1.10909	0.198406	0.82785	0.999952
+pH fractionation/SP	Q8N0X7	Q8N0X7	AFLFVNK	[K].AFLFVNK.[G]		0.00295288	1	4	1.22338	0.138387	1.1219	2.37114	-1.08499	0.51334	0.861207	1.29949	0.245089	0.810964	1.54263	-1.0544	0.37449	0.999952
+pH fractionation/SP	P78527	P78527-2; P78527	AFLGELK	[R].AFLGELK.[T]		0.00246223	1	19	-0.888396	1.22763	1.86948	0.208883	2.11603	0.227284	0.818997	1.34087	1.80828	1.67065	0.669767	0.467411	0.67616	0.999952
+pH fractionation/SP	O14646	O14646-2; O14646	AFLGGLNWAFIGVDEAHR	[K].AFLGGLNWAFIGVDEAHR.[L]		0	1	1	0.177065	-0.473886	0.129553	0.904342	-0.650951	0.284702	0.819124	-0.341099	-0.385194	0.72652	0.0567377	-0.0440942	0.921577	0.999952
+pH fractionation/SP	P29372	P29372-4; P29372; P29372-2; P29372-5	AFLGQVLVR	[R].AFLGQVLVR.[R]		0.000177325	1	2	0.00653417	-0.624949	0.378484	1.81186	-0.631483	0.586353	0.88045	-1.14345	-1.9946	0.814834	0.494503	-0.85115	0.196839	0.999952
+pH fractionation/SP	P49207	P49207	AFLIEEQK	[R].AFLIEEQK.[I]		0.000360009	1	42	2.3016	3.16883	0.204815	0.669987	0.867231	0.0986414	0.818997	3.62723	3.23437	1.55227	1.01194	-0.392865	0.732056	0.999952
+pH fractionation/SP	Q96JH7	Q96JH7	AFLIEPEHVNTVGYGK	[R].AFLIEPEHVNTVGYGK.[D]		0.00223086	1	1	1.20829	0.562828	0.222131	0.560684	-0.645467	0.137387	0.818997	0.196594	1.13002	1.46105	0.383043	0.933429	0.344733	0.999952
+pH fractionation/SP	Q96JM3	Q96JM3	AFLLESLLK	[K].AFLLESLLK.[N]		0.000246334	1	5	3.78523	3.21025	0.0975462	0.956394	-0.574985	0.358748	0.828253	3.6276	2.8251	0.763949	0.605766	-0.802502	0.227107	0.999952
+pH fractionation/SP	Q9H6V9-2	Q9H6V9-2; Q9H6V9-4; Q9H6V9-3; Q9H6V9	AFLLFPTIER	[R].AFLLFPTIER.[M]		0.000420983	1	3	-0.404582	-0.145143	0.303089	2.44797	0.259439	0.864306	0.962071	0.2773	-1.37522	1.52226	0.723063	-1.65252	0.185835	0.999952
+pH fractionation/SP	Q8IV08	Q8IV08	AFLLSLAALR	[R].AFLLSLAALR.[D]		0.000114852	1	1	-2.97933	-0.698083	0.120556	0.471499	2.28125	0.0220072	0.752216							NA
+pH fractionation/SP	P36776	P36776-2; P36776-3; P36776	AFLMQHAPANDYLVTSHIHLHVPEGATPK	[R].AFLMQHAPANDYLVTSHIHLHVPEGATPK.[D]		3.35083e-05	1	2							NA	-1.51046		1.66107				NA
+pH fractionation/SP	Q14839-2	Q14839-2; Q14839; Q8TDI0	AFLNAIMR	[K].AFLNAIMR.[YW]		0.000420983	1	11	-1.25071	-0.20139	0.316895	0.993813	1.04932	0.156406	0.818997	0.80129	-0.130537	1.7253	1.7782	-0.931827	0.599283	0.999952
+pH fractionation/SP	Q14839-2	Q14839-2; Q14839; Q8TDI0	AFLNAIMR	[K].AFLNAIMR.[YW]	1xOxidation [M7]	0.00293532	1	4	1.29286	3.00379	1.37351	0.76281	1.71093	0.132332	0.818997	-0.217659	-1.66989	2.53079	0.934418	-1.45223	0.403924	0.999952
+pH fractionation/SP	Q12873-3	Q12873-3; Q12873; Q12873-2	AFLNAVMR	[K].AFLNAVMR.[W]		0.000592394	1	3	-0.928505	0.332365	0.239755	0.328028	1.26087	0.0148084	0.693261	-1.01426	-2.44832	3.13249		-1.43405		NA
+pH fractionation/SP	Q5JSL3	Q5JSL3	AFLNDSQASK	[R].AFLNDSQASK.[Y]		0.00562911	1	1	1.96835	2.11239	0.693821	1.11732	0.144041	0.858787	0.960863	0.925293	0.302606	1.04632	0.809426	-0.622687	0.460663	0.999952
+pH fractionation/SP	Q13627	Q13627-4; Q13627-3; Q13627-5; Q13627; Q13627-2	AFLNQAQIEVR	[K].AFLNQAQIEVR.[L]		4.19381e-05	1	4	-1.3067	-0.958461	1.14544	0.556125	0.348244	0.66688	0.901859	-1.08218	-0.387527	1.26349	1.24063	0.69465	0.534128	0.999952
+pH fractionation/SP	Q8NBQ5	Q8NBQ5	AFLPAMTK	[K].AFLPAMTK.[N]		0.00192047	1	5	-0.434261	-2.64708	0.233821	0.199817	-2.21282	0.000238494	0.416811	-1.30913	-1.5888	1.35218	0.961432	-0.279666	0.833783	0.999952
+pH fractionation/SP	Q14690	Q14690	AFLPLLK	[R].AFLPLLK.[A]		0.00181525	1	5	-2.16016	-0.127663	1.30318	2.18287	2.0325	0.238363	0.818997	1.44842	1.1842	2.28681	1.57557	-0.264216	0.8771	0.999952
+pH fractionation/SP	Q14690	Q14690	AFLPTSHLSDHVANGPLLHHWLQAGDILHR	[R].AFLPTSHLSDHVANGPLLHHWLQAGDILHR.[V]		0	1	1	0.540761	0.623145	0.765873	0.996555	0.0823843	0.915079	0.97701	1.44956	1.87858	0.382009	1.3549	0.429026	0.625516	0.999952
+pH fractionation/SP	Q14203-4	Q14203-4; Q14203; Q14203-6; Q14203-5; Q14203-3; Q14203-2	AFLQGGQEATDIALLLR	[R].AFLQGGQEATDIALLLR.[D]		0	1	6	2.99908	2.36347	0.137113	1.42761	-0.635609	0.485516	0.854843	1.50389	1.39987	1.66665	0.880195	-0.10402	0.928443	0.999952
+pH fractionation/SP	P50851-2	P50851-2; P50851	AFLSDMIK	[R].AFLSDMIK.[L]		0.00100015	1	4	2.49971	3.72938	0.460197	1.59163	1.22967	0.267994	0.818997	3.10957	3.74463	1.68376	0.565928	0.63506	0.56929	0.999952
+pH fractionation/SP	Q96S44	Q96S44	AFLSTHPNTETVFEAFLK	[K].AFLSTHPNTETVFEAFLK.[S]		4.19381e-05	1	1	-3.23136	-1.79865	0.148999	2.67811	1.43271	0.525057	0.863139	0.299682	1.08347	3.17093	0.968772	0.783791	0.703189	0.999952
+pH fractionation/SP	Q6P9B9	Q6P9B9	AFLTGVDPILGHQLSAR	[K].AFLTGVDPILGHQLSAR.[E]		0	1	3	-4.46215	-3.88757		0.809264	0.574573		NA	-2.45802	-1.66166	2.24249		0.796366		NA
+pH fractionation/SP	P61026	P61026	AFLTLAEDILR	[K].AFLTLAEDILR.[K]		4.19381e-05	1	18	-0.771152	-1.7229	1.18763	1.21358	-0.951743	0.511061	0.860695	-0.82341						NA
+pH fractionation/SP	Q96L73	Q96L73; Q96L73-3; Q96L73-2	AFLYEPTTQASGR	[K].AFLYEPTTQASGR.[A]		0.000420983	1	1	1.04438	1.85462	0.142254	0.717813	0.810236	0.127599	0.818997	-0.401446	0.311769	2.22305	1.24381	0.713215	0.653076	0.999952
+pH fractionation/SP	Q5JTH9	Q5JTH9	AFMDIMSAQASSGSTSVLR	[K].AFMDIMSAQASSGSTSVLR.[W]		0	1	4	-1.0355	-2.91587			-1.88038		NA	-3.44264		0.36414				NA
+pH fractionation/SP	P46013; P46013-2	P46013; P46013-2	AFMESPK	[K].AFMESPK.[Q]		0.00162688	2	3	0.693097	5.71787	0.547375	1.73689	5.02478	0.00878146	0.646064	5.9718	7.74967	1.62363	1.10119	1.77787	0.191586	0.999952
+pH fractionation/SP	P46013; P46013-2	P46013; P46013-2	AFMESPKQILDSAASLTGSKR	[K].AFMESPKQILDSAASLTGSKR.[Q]		3.35083e-05	2	1	-2.94105	-2.76122	0.710503	2.88219	0.179833	0.939469	0.982883	-0.864546	-1.37523	1.82647	0.099291	-0.510685	0.65397	0.999952
+pH fractionation/SP	P39023	P39023	AFMGPLK	[K].AFMGPLK.[K]		0.00181525	1	45	-2.39922	-1.12393	0.882561	1.91722	1.27529	0.354377	0.826833	-0.574621	-1.24212	3.29528	1.21146	-0.667497	0.809563	0.999952
+pH fractionation/SP	P39023	P39023	AFMGPLK	[K].AFMGPLK.[K]	1xOxidation [M3]	0.00153452	1	18	4.22578	5.53004	0.687569	1.40454	1.30426	0.222082	0.818997	5.66922	3.32939	0.922274	2.99779	-2.33982	0.265909	0.999952
+pH fractionation/SP	P46013; P46013-2	P46013; P46013-2	AFMGTPVQK	[KY].AFMGTPVQK.[L]	1xOxidation [M3]	0.000877399	2	4		-1.7886		2.83439			NA	1.77681	-0.397745	0.319785	0.690113	-2.17456	0.0276924	0.999952
+pH fractionation/SP	P46013; P46013-2	P46013; P46013-2	AFMGTPVQK	[KY].AFMGTPVQK.[L]		0.000275366	2	10	-3.46843	-1.61019	1.83347	2.61088	1.85824	0.37012	0.829318	0.613206	0.146687	1.71965	0.626915	-0.466518	0.681693	0.999952
+pH fractionation/SP	Q00610	Q00610; P53675-2; P53675; Q00610-2	AFMTADLPNELIELLEK	[K].AFMTADLPNELIELLEK.[I]	1xOxidation [M3]	0	1	2	-2.54826	-0.823222			1.72504		NA	-3.55372	-2.00105			1.55267		NA
+pH fractionation/SP	Q00610	Q00610; P53675-2; P53675; Q00610-2	AFMTADLPNELIELLEK	[K].AFMTADLPNELIELLEK.[I]		0	1	2	-1.31061	0.287886			1.5985		NA	0.738866	0.532695	1.78103	0.706021	-0.206172	0.893005	0.999952
+pH fractionation/SP	Q92766-2	Q92766-2; Q92766; RREB1_6703_E0; Q92766-5; Q92766-3; RREB1_6703_I0	AFMTAPGGK	[K].AFMTAPGGK.[K]		0.00122739	1	2	2.04203	1.77289	0.34198	2.17581	-0.269142	0.842725	0.955009	1.31206	0.936716	0.715398	0.311701	-0.375342	0.451643	0.999952
+pH fractionation/SP	O95983	O95983; O95983-2	AFMVTDEDIR	[K].AFMVTDEDIR.[K]		9.74898e-05	1	6	-2.59837	-1.89795	0.920046	1.04092	0.700422	0.549807	0.870248	-2.57053	-0.248719	2.34993		2.32181		NA
+pH fractionation/SP	Q9Y4C8	Q9Y4C8	AFNALCHSTHLYGR	[R].AFNALCHSTHLYGR.[R]	1xCarbamidomethyl [C6]	0	1	1	2.15784	3.18856	1.2822	1.8763	1.03072	0.554386	0.871194	3.66523	2.33599	0.681691	0.544952	-1.32924	0.0915815	0.999952
+pH fractionation/SP	Q92598	Q92598-3; Q92598-2; Q92598-4; Q92598	AFNDPFIQK	[R].AFNDPFIQK.[E]		4.19381e-05	1	22	0.337844	0.070114	0.757655	1.48437	-0.26773	0.79461	0.938973	-0.968788	-0.555311	0.47423	0.829895	0.413477	0.495362	0.999952
+pH fractionation/SP	P51809	P51809-2; P51809; P51809-3	AFNFLNEIK	[R].AFNFLNEIK.[K]		0.000236593	1	8	0.687778	0.616966	0.408983	1.401	-0.0708118	0.937065	0.982651	-1.23619	0.0683554	2.81527	0.440029	1.30454	0.472175	0.999952
+pH fractionation/SP	Q99676	Q99676	AFNQNIHLTQHK	[R].AFNQNIHLTQHK.[R]		4.19381e-05	1	2	3.54415	1.58852	0.407564	1.42323	-1.95563	0.0840418	0.818997	0.68913	0.600592	1.7818	0.100936	-0.0885386	0.935652	0.999952
+pH fractionation/SP	Q8NF99	Q8NF99	AFNQSSALIR	[K].AFNQSSALIR.[H]		0.000542627	1	1	0.850144	-1.09657	1.50474		-1.94671		NA	-1.81609		4.31016				NA
+pH fractionation/SP	P46060	P46060	AFNSSSFNSNTFLTR	[K].AFNSSSFNSNTFLTR.[L]		0	1	11	3.34445	2.6107	0.251664	1.08656	-0.733746	0.318107	0.820259	3.32044	2.26904	0.765893	0.339982	-1.05141	0.0954638	0.999952
+pH fractionation/SP	Q99543	Q99543; Q99543-2	AFNSVDPTFDNSVPSK	[R].AFNSVDPTFDNSVPSK.[S]		4.19381e-05	1	5	1.31033	0.852849	0.475766	0.638217	-0.45748	0.41833	0.83914	-2.12839	-1.53402	2.97097	0.0700392	0.594367	0.803881	0.999952
+pH fractionation/SP	Q9BSJ2-4	Q9BSJ2; Q9BSJ2-3; Q9BSJ2-4	AFNYASK	[K].AFNYASK.[V]		0.0054721	1	2	0.558783	0.693563	0.232469	0.657322	0.13478	0.75458	0.926579	0.89188	1.12075	0.741529	0.4627	0.228874	0.67367	0.999952
+pH fractionation/SP	Q02252	Q02252; Q02252-2	AFPAWADTSVLSR	[R].AFPAWADTSVLSR.[Q]		0	1	3		0.823999					NA	0.565404	0.836056	0.27411	0.877824	0.270652	0.717667	0.999952
+pH fractionation/SP	P55786	P55786	AFPCWDEPAIK	[R].AFPCWDEPAIK.[A]	1xCarbamidomethyl [C4]	0.000114852	1	3	-1.38679	-0.752652	0.406188	1.05822	0.634138	0.387419	0.831888	-1.85141	-1.10884	0.993377	0.812683	0.742567	0.372995	0.999952
+pH fractionation/SP	P13807	P13807; P13807-2	AFPEHFTYEPNEADAAQGYR	[K].AFPEHFTYEPNEADAAQGYR.[Y]		0	1	3	-1.67565	-0.616721	0.810274	0.273145	1.05893	0.0985346	0.818997	-0.873417	-0.940741		0.195733	-0.0673231		NA
+pH fractionation/SP	P34897	P34897; P34897-3; P34897-2	AFPMPGFDEH	[R].AFPMPGFDEH.[-]		0.000177325	1	19	5.64748	3.67541	0.973746	2.5406	-1.97208	0.277666	0.819124	3.06683	3.19018	1.06501	0.430582	0.123347	0.861513	0.999952
+pH fractionation/SP	O43813	O43813	AFPNPYADYNK	[R].AFPNPYADYNK.[S]		4.19381e-05	1	5	6.81468	6.61944	0.0186765	2.04457	-0.195243	0.876658	0.966301	5.27765	5.4047	1.52831	1.28298	0.127048	0.9175	0.999952
+pH fractionation/SP	Q6UN15-3; Q6UN15	Q6UN15-5; Q6UN15-3; Q6UN15	AFPYGNVAFPHLPGSAPSWPSLVDTSK	[R].AFPYGNVAFPHLPGSAPSWPSLVDTSK.[Q]		0	2	3	-0.736575	-0.956798	0.248876	2.20155	-0.220223	0.87167	0.964773	-1.16624	-2.2251	1.40276	1.13842	-1.05886	0.416192	0.999952
+pH fractionation/SP	Q9UIG0	Q9UIG0; Q9UIG0-2	AFQEGIAK	[K].AFQEGIAK.[A]		0.00156863	1	4	-3.77655	-2.99826	0.495946	0.815389	0.778291	0.368007	0.829318	-0.693408	-1.74977	0.70642		-1.05636		NA
+pH fractionation/SP	Q14865	Q14865-3; Q14865	AFQFHLEGKPR	[K].AFQFHLEGKPR.[I]		0.000360009	1	1	-1.38208	-3.8442	0.183704	0.110222	-2.46213	0.00047988	0.436786	-2.5292	-3.68604			-1.15685		NA
+pH fractionation/SP	P38432	P38432	AFQLEEGEETEPDCK	[R].AFQLEEGEETEPDCK.[Y]	1xCarbamidomethyl [C14]	0	1	2		-0.681518					NA	-3.14379	-2.42989	0.752752	1.9812	0.713905	0.680778	0.999952
+pH fractionation/SP	Q96SB8-2	Q96SB8-2; Q96SB8	AFQNQENSVNQEIEQFQQAIEK	[K].AFQNQENSVNQEIEQFQQAIEK.[D]		4.19381e-05	1	1	-2.88761	-2.7305	1.33669	0.356788	0.157104	0.853663	0.958834	-1.78063	-2.76918		0.354837	-0.988557		NA
+pH fractionation/SP	P15586	P15586; P15586-2	AFQNVFAPR	[K].AFQNVFAPR.[N]		9.74898e-05	1	11	0.221404	0.790046	1.52825	1.6586	0.568642	0.725649	0.917606	2.03994	2.62917	1.22008	1.26178	0.589236	0.592117	0.999952
+pH fractionation/SP	O00115	O00115; O00115-2	AFQPLVK	[K].AFQPLVK.[N]		0.00450464	1	2	-2.27455	-0.95179	0.745239	0.254447	1.32276	0.140743	0.818997	-4.54843	-3.18576		1.35624	1.36267		NA
+pH fractionation/SP	Q9P2S5	Q9P2S5	AFQWDPQQPR	[R].AFQWDPQQPR.[L]		0.000877399	1	1	-0.378097	1.23712	0.4964	2.00345	1.61522	0.246765	0.818997	2.56133	4.43125	0.972767	0.725368	1.86992	0.055858	0.999952
+pH fractionation/SP	P00747	Q02325; Q15195; P00747	AFQYHSK	[R].AFQYHSK.[E]		0.00849451	1	1	-4.72562	-2.1284	0.739356	2.05426	2.59723	0.198753	0.818997	0.908048	-2.51983	0.706829	1.65891	-3.42788	0.0301417	0.999952
+pH fractionation/SP	P30048	P30048; P30048-2	AFQYVETHGEVCPANWTPDSPTIKPSPAASK	[K].AFQYVETHGEVCPANWTPDSPTIKPSPAASK.[E]	1xCarbamidomethyl [C12]	0	1	15	-2.9638	0.253622	0.255686		3.21743		NA	1.0243	-3.15381			-4.1781		NA
+pH fractionation/SP	P13010	P13010	AFREEAIKFSEEQR	[R].AFREEAIKFSEEQR.[F]		4.19381e-05	1	2	-2.98602	2.26769			5.25371		NA	0.682367	1.73612	3.54985	0.184244	1.05375	0.634692	0.999952
+pH fractionation/SP	Q9Y4A5	Q9Y4A5; Q9Y4A5-2	AFSAAVQMHDVLVK	[K].AFSAAVQMHDVLVK.[A]		4.19381e-05	1	1	-1.56943	1.48461	1.40364	0.177149	3.05404	0.0201397	0.738189	2.17799	2.89017	0.73735	0.479863	0.712181	0.233507	0.999952
+pH fractionation/SP	P34932	P34932-2; P34932	AFSDPFVEAEK	[R].AFSDPFVEAEK.[S]		3.35083e-05	1	27	1.36505	-0.0772209	0.23205	1.95422	-1.44227	0.273134	0.818997	-1.22873	-1.50007	1.61204	0.709793	-0.271332	0.802803	0.999952
+pH fractionation/SP	Q96GN5	Q96GN5-2; Q96GN5; Q96GN5-5; Q96GN5-4	AFSEGQITR	[R].AFSEGQITR.[R]		0.000246334	1	4		-0.313928					NA	-0.173726	-0.629762	1.58363	1.06582	-0.456036	0.71874	0.999952
+pH fractionation/SP	Q8IWI9-4	Q8IWI9-3; Q8IWI9-4; Q8IWI9-2; Q8IWI9	AFSEIQGLTDQADK	[R].AFSEIQGLTDQADK.[L]		0	1	3	-3.01217	-1.13665	1.41727	2.37095	1.87553	0.400387	0.834942	-0.452191	-0.422941	3.23115	0.709726	0.0292499	0.988515	0.999952
+pH fractionation/SP	Q9NS87	Q9NS87; Q9NS87-2; Q9NS87-4	AFSEISGMEK	[K].AFSEISGMEK.[S]		0.000236593	1	4	0.616555	1.4209	0.209278	3.24574	0.804345	0.671524	0.903373	1.86096	2.67067	2.45527	1.26779	0.809715	0.638482	0.999952
+pH fractionation/SP	P10768	P10768	AFSGYLGTDQSK	[K].AFSGYLGTDQSK.[W]		3.35083e-05	1	16	0.284056	1.3602	0.688865	1.86159	1.07615	0.400878	0.835149	2.35931	2.88827	2.16632	0.648313	0.528961	0.706087	0.999952
+pH fractionation/SP	Q15776	Q15776	AFSHSSHLIGHQR	[K].AFSHSSHLIGHQR.[I]		0	1	2	0.782923	-0.456805		1.40284	-1.23973		NA	-1.21669						NA
+pH fractionation/SP	P17029	P17029	AFSHSSNLILHQR	[K].AFSHSSNLILHQR.[I]		0	1	2	-1.28682		0.140588				NA	-3.80268	-3.82481	1.58143		-0.0221283		NA
+pH fractionation/SP	Q9UPN3; Q9UPN3-5	Q9UPN3; Q9UPN3-5; Q9UPN3-3; Q9UPN3-4; Q9UPN3-2	AFSIDIIR	[K].AFSIDIIR.[H]		0.00155688	2	2	-3.47427	-1.48112	0.210039	0.590269	1.99315	0.046021	0.818997		-3.04752					NA
+pH fractionation/SP	O15067	O15067	AFSITQGLLK	[R].AFSITQGLLK.[D]		6.09156e-05	1	15	1.74396	0.57595	0.415737	1.09069	-1.16801	0.158091	0.818997	-1.12161	0.132937	2.4146	0.427028	1.25455	0.425591	0.999952
+pH fractionation/SP	P61619	P61619; P61619-3	AFSPTTVNTGR	[K].AFSPTTVNTGR.[G]		4.19381e-05	1	26	-2.1074	0.781298	0.571131	3.59664	2.8887	0.233759	0.818997	1.63238	2.70469	3.1359	0.600254	1.07231	0.59197	0.999952
+pH fractionation/SP	O60506	O60506-4; O60506-5; O60506; O60506-2; O60506-3	AFSQFGK	[K].AFSQFGK.[L]		0.0024516	1	18	2.40975	3.31306	0.223618	1.30911	0.903311	0.304064	0.819326	3.94252	4.73018	1.66402	0.478186	0.787669	0.47478	0.999952
+pH fractionation/SP	P17028	P17028	AFSQNSGLINHQR	[K].AFSQNSGLINHQR.[I]		3.35083e-05	1	4	-1.8227	-0.422535	1.02105	1.15514	1.40017	0.190821	0.818997	-1.15504	0.272997	2.28755	0.422921	1.42803	0.467189	0.999952
+pH fractionation/SP	P17029	P17029	AFSQSSDLTK	[K].AFSQSSDLTK.[H]		0.00608089	1	1	1.65048	1.32867	0.211634	2.57208	-0.321804	0.839574	0.95385	0.336214	-1.77499	1.75781	0.935722	-2.1112	0.140199	0.999952
+pH fractionation/SP	P17036	P17036	AFSQSSHLIQHQR	[K].AFSQSSHLIQHQR.[I]		3.35083e-05	1	1	-1.42648	-2.39614	1.15028		-0.969662		NA	-0.719321	-4.77086			-4.05154		NA
+pH fractionation/SP	Q8N3J9	Q8N3J9	AFSQSSSLCIHQR	[K].AFSQSSSLCIHQR.[V]	1xCarbamidomethyl [C9]	0	1	1		1.24689					NA	1.37897	-1.21694	0.880441	1.02603	-2.59591	0.0624012	0.999952
+pH fractionation/SP	Q8N720-3	Q8N720-3; Q8N720	AFSQTSCLIQHHK	[K].AFSQTSCLIQHHK.[M]	1xCarbamidomethyl [C7]	4.19381e-05	1	2		-1.52319		2.25561			NA	-0.105353	0.585198	0.892905	0.757869	0.690551	0.416899	0.999952
+pH fractionation/SP	Q53F19	Q53F19; Q53F19-2	AFSSNPVVR	[K].AFSSNPVVR.[R]		0.000224101	1	6	4.16622	2.38628	1.17225	2.28766	-1.77994	0.296578	0.819326	3.89982	3.82722	0.472445	0.709434	-0.0725946	0.88986	0.999952
+pH fractionation/SP	Q14241	Q14241	AFSSPQEEEEAGFTGR	[K].AFSSPQEEEEAGFTGR.[R]		0	1	3	-0.180115	-1.19588	0.477496	1.89759	-1.01576	0.419422	0.83914	-0.286349	-0.812136	1.02872	1.88073	-0.525787	0.69282	0.999952
+pH fractionation/SP	Q13907-2	Q13907-2; Q13907	AFSVFLFNTENK	[R].AFSVFLFNTENK.[L]		4.19381e-05	1	4	-2.54967	-1.82759	4.66199	2.78317	0.722077	0.836755	0.953265	-0.58736	-2.61468	0.634621	3.3204	-2.02732	0.344904	0.999952
+pH fractionation/SP	P11279	P11279; P11279-2	AFSVNIFK	[K].AFSVNIFK.[V]		0.000290357	1	5	-0.200683	0.435611	0.368758	0.774069	0.636294	0.286433	0.819124	-2.08349	-1.54959	2.24688	0.919318	0.533902	0.779444	0.999952
+pH fractionation/SP	Q9UN86	Q9UN86; G3BP2_3043_I1	AFSWASVTSK	[K].AFSWASVTSK.[N]		0.000177325	1	8		-1.12467		0.143522			NA		0.243504					NA
+pH fractionation/SP	Q16629	Q16629; Q16629-4; Q16629-2; Q16629-3	AFSYYGPLR	[R].AFSYYGPLR.[T]		0.000192563	1	37	-3.67076	-0.755421	0.0366382	4	2.91534	0.411019	0.837279	2.51868	2.30563	0.649626	0.619948	-0.213048	0.735657	0.999952
+pH fractionation/SP	Q96RL7	Q96RL7-2; Q96RL7-4; Q96RL7-3; Q96RL7	AFTEAATGSSADFVK	[K].AFTEAATGSSADFVK.[D]		4.19381e-05	1	1	-5.42811	-0.165336	0.690307		5.26278		NA	0.00451946	-1.57471			-1.57923		NA
+pH fractionation/SP	O60925	O60925	AFTELQAK	[K].AFTELQAK.[V]		0.00766079	1	2	-2.32164	-0.830312	0.481832	2.2113	1.49133	0.317418	0.820259	0.924702	1.97954	2.67171	0.844039	1.05484	0.549924	0.999952
+pH fractionation/SP	Q9UNZ2-5; Q9UNZ2-4	Q9UNZ2-5; Q9UNZ2-6; Q9UNZ2; Q9UNZ2-4	AFTGEGQK	[K].AFTGEGQK.[L]		0.00141238	2	5	-1.44401		0.569585				NA	-1.1425	-0.57132	0.69385		0.571183		NA
+pH fractionation/SP	P11310-2	P11310-2; P11310	AFTGFIVEADTPGIQIGR	[K].AFTGFIVEADTPGIQIGR.[K]		0	1	3	-3.43505	-2.03987	1.31886	1.63666	1.39519	0.364291	0.829318	-1.98055						NA
+pH fractionation/SP	P16615	P16615-3; P16615-2; P16615; P16615-4; P16615-5	AFTGREFDELNPSAQR	[K].AFTGREFDELNPSAQR.[D]		4.19381e-05	1	1	-0.773521		0.171594				NA	-2.23382		0.102252				NA
+pH fractionation/SP	Q6P2D0	Q6P2D0; Q6P2D0-2	AFTHQSNLIVHQR	[K].AFTHQSNLIVHQR.[A]		6.09156e-05	1	1	-3.27122	3.687	2.19825		6.95822		NA	1.48799	2.81363	2.38253	0.609717	1.32565	0.515813	0.999952
+pH fractionation/SP	P31939	P31939-2; P31939	AFTHTAQYDEAISDYFR	[K].AFTHTAQYDEAISDYFR.[K]		0	1	22	1.02666	-1.54167	0.0384623	3.39987	-2.56833	0.260871	0.818997	0.38278	1.27619	1.83383	0.517014	0.893412	0.567123	0.999952
+pH fractionation/SP	P31939	P31939-2; P31939	AFTHTAQYDEAISDYFRK	[K].AFTHTAQYDEAISDYFRK.[Q]		0	1	2	2.08579	0.645	2.5957	2.36145	-1.44079	0.516263	0.861497	1.02044	-0.143412	3.00844	2.3564	-1.16385	0.625743	0.999952
+pH fractionation/SP	P22102	P22102-2; P22102	AFTKPEEACSFILSADFPALVVK	[K].AFTKPEEACSFILSADFPALVVK.[A]	1xCarbamidomethyl [C9]	0	1	5	3.41339	3.05955	0.584853	0.956432	-0.353843	0.613662	0.888083	2.83386	2.74409	1.21192	0.781462	-0.0897751	0.919322	0.999952
+pH fractionation/SP	Q9UQE7	Q9UQE7	AFTMDCITLEGDQVSHR	[R].AFTMDCITLEGDQVSHR.[G]	1xCarbamidomethyl [C6]	0	1	3	-2.26939	1.17128			3.44067		NA	-1.26268	-0.30312	1.06836	0.554285	0.959557	0.340196	0.999952
+pH fractionation/SP	Q5K651	Q5K651	AFTNTATATEEDVK	[K].AFTNTATATEEDVK.[M]		0	1	4	-1.62261	-0.657722	0.900408		0.964884		NA	-2.14944	-2.62603	1.20809	3.91335	-0.476592	0.845857	0.999952
+pH fractionation/SP	P12955	P12955-3; P12955-2; P12955	AFTPFSGPK	[K].AFTPFSGPK.[-]		0.000711679	1	1							NA	-2.41031	-3.90017	2.03249		-1.48986		NA
+pH fractionation/SP	Q13105-2	Q13105-3; Q13105-2; Q13105	AFTQASSLIAHVR	[K].AFTQASSLIAHVR.[Q]		3.35083e-05	1	1	-2.4845	-3.32286		5.08837	-0.838356		NA	-1.4698	1.27868	4.38342	0.858106	2.74848	0.475932	0.999952
+pH fractionation/SP	Q96GQ5	Q96GQ5	AFTVKPEGR	[R].AFTVKPEGR.[D]		4.19381e-05	1	3	-2.84656	-1.84775	2.75721	1.58739	0.998812	0.615491	0.888244	-2.46413	-3.28738	2.055	1.96856	-0.823254	0.722102	0.999952
+pH fractionation/SP	P58317	P58317	AFTVSSSLHNHVK	[K].AFTVSSSLHNHVK.[I]		0	1	1	-3.41136	0.30175			3.71311		NA		-2.39374		1.21074			NA
+pH fractionation/SP	O00442	O00442-2; O00442	AFVAGVLPFK	[R].AFVAGVLPFK.[V]		4.19381e-05	1	9	-1.07131	-0.815778	1.68186	0.546115	0.255535	0.814689	0.946636	-1.90046	-2.52939	2.34421	0.953003	-0.628924	0.68903	0.999952
+pH fractionation/SP	P15880	P15880	AFVAIGDYNGHVGLGVK	[K].AFVAIGDYNGHVGLGVK.[C]		0	1	14	-3.02941	-2.10722	0.84138	1.42542	0.922196	0.38919	0.832381	-0.516692	0.376753	2.33099	0.890876	0.893445	0.568754	0.999952
+pH fractionation/SP	Q07021	Q07021	AFVDFLSDEIK	[K].AFVDFLSDEIK.[E]		4.19381e-05	1	29	2.59895	1.1412	0.617865	2.68544	-1.45775	0.411365	0.837462	1.71026	1.01177	1.41316	2.3179	-0.698495	0.678904	0.999952
+pH fractionation/SP	Q07021	Q07021	AFVDFLSDEIKEER	[K].AFVDFLSDEIKEER.[K]		0	1	35	-0.917008	3.81415	0.1297		4.73115		NA	2.35788	4.25782	3.99394	0.51564	1.89994	0.459711	0.999952
+pH fractionation/SP	P48147	P48147	AFVEAQNK	[K].AFVEAQNK.[I]		0.000387362	1	6	-2.10854	-1.66069	2.19107	0.45835	0.447849	0.734693	0.920418	0.662622	-1.7954		0.450678	-2.45802		NA
+pH fractionation/SP	Q9NRW7	Q9NRW7-2; Q9NRW7	AFVENYPQFK	[K].AFVENYPQFK.[K]		0.000114852	1	2	-1.78182	-1.57912	0.166078	0.843048	0.202698	0.770309	0.931647	-1.49346	-0.703087	0.724774	0.618739	0.790369	0.224205	0.999952
+pH fractionation/SP	Q9HCS7	Q9HCS7	AFVFMHK	[R].AFVFMHK.[M]		0.00210486	1	3	0.677248	1.12275	0.110547	0.854972	0.445497	0.421346	0.839359	0.459937	0.415832	0.642392	0.970203	-0.0441053	0.950805	0.999952
+pH fractionation/SP	Q71U36; Q9BQE3; P68366	Q13748; Q71U36; Q9NY65; P68366-2; P68363; Q71U36-2; Q9BQE3; P68363-2; Q9NY65-2; P68366	AFVHWYVGEGMEEGEFSEAR	[R].AFVHWYVGEGMEEGEFSEAR.[E]		0	3	39	-0.24891	-0.0255663	3.23262	1.17971	0.223343	0.915909	0.977179	0.148528	-5.58863	0.799399	0.972213	-5.73716	0.00530681	0.999952
+pH fractionation/SP	Q71U36; Q9BQE3; P68366	Q13748; Q71U36; Q9NY65; P68366-2; P68363; Q71U36-2; Q9BQE3; P68363-2; Q9NY65-2; P68366	AFVHWYVGEGMEEGEFSEAR	[R].AFVHWYVGEGMEEGEFSEAR.[E]	1xOxidation [M11]	0	3	18	4.26308	3.07238	0.81288	2.06669	-1.19071	0.405633	0.835433	1.66403	0.659352	1.72366	0.241418	-1.00468	0.373984	0.999952
+pH fractionation/SP	Q13105-2	Q13105-3; Q13105-2; Q13105	AFVNVGDLSK	[K].AFVNVGDLSK.[H]		0.000177325	1	3	1.11386	0.548331	1.13282	1.01505	-0.565526	0.598585	0.883304	3.02007	-2.75545		1.54962	-5.77552		NA
+pH fractionation/SP	Q9HAU5	Q9HAU5; Q9HAU5-2	AFVPAILFK	[K].AFVPAILFK.[D]		0.000318209	1	4	-2.56897	-0.280244	0.685781		2.28873		NA	0.739956	0.0365028	0.128887		-0.703454		NA
+pH fractionation/SP	Q96P48	Q96P48-5; Q96P48-1; Q96P48-7; Q96P48-4; Q96P48-2; Q96P48; Q96P48-3	AFVPPLAEDLLAR	[K].AFVPPLAEDLLAR.[D]		0.000849071	1	2	-0.557345	-4.34751	0.278605		-3.79016		NA	-0.237502	-4.57032		0.758799	-4.33282		NA
+pH fractionation/SP	P51532	P51532; P51532-5; P51532-2; P51532-4; P51532-3	AFVPQLR	[R].AFVPQLR.[S]		0.00236123	1	12	1.15274	2.0401	0.367974	2.18654	0.887354	0.526351	0.863354	3.6571	3.59914	2.49196	0.881975	-0.0579607	0.971525	0.999952
+pH fractionation/SP	O95394-4	O95394; O95394-3; O95394-4	AFVRPSGTEDVVR	[R].AFVRPSGTEDVVR.[V]		4.19381e-05	1	1	0.799592	0.202595	0.591873	1.31911	-0.596997	0.514016	0.861298	-1.48761	-1.4238	3.03631	1.13375	0.06381	0.974431	0.999952
+pH fractionation/SP	Q14683	Q14683	AFVSMVYSEEGAEDR	[R].AFVSMVYSEEGAEDR.[T]		0	1	5	-0.151606	0.13197	0.873715	0.479053	0.283576	0.647897	0.896809	-1.55382	-1.10536	1.9282	1.13182	0.448457	0.79196	0.999952
+pH fractionation/SP	Q9NVI7-2	Q9NVI7-3; Q9NVI7-2; Q9NVI7	AFVTDWDK	[R].AFVTDWDK.[V]		0.000433877	1	13	5.99521	5.69317	0.746219	0.730455	-0.302043	0.642687	0.895199	5.96893	5.25785	0.151757	0.502158	-0.711076	0.0787057	0.999952
+pH fractionation/SP	Q9Y2U8	Q9Y2U8	AFVTVTHR	[R].AFVTVTHR.[L]		0.00270088	1	2	-1.95858	-2.33417	1.52777	0.54882	-0.37559	0.77018	0.931647	-3.1435		4.28858				NA
+pH fractionation/SP	P55011	P55011-3; P55011	AFYAPVHADDLR	[K].AFYAPVHADDLR.[E]		3.35083e-05	1	3	-0.710257	-0.694399	0.648545	2.33166	0.0158578	0.991488	0.997565	0.433659	1.82679	1.95542	0.521644	1.39313	0.299041	0.999952
+pH fractionation/SP	Q9HCC0	Q9HCC0-2; Q9HCC0	AFYGDTLVTGFAR	[K].AFYGDTLVTGFAR.[I]		4.19381e-05	1	2	3.31943	-2.20713	0.693931	5.24998	-5.52656	0.144955	0.818997	-1.34325	-1.66454	4.99498	2.59441	-0.321294	0.925998	0.999952
+pH fractionation/SP	P04181	P04181	AFYNNVLGEYEEYITK	[R].AFYNNVLGEYEEYITK.[L]		0	1	4	-0.2864	-1.28391	1.71254	0.934798	-0.997514	0.518732	0.861685	-0.722287	-3.0316	0.951673	2.65498	-2.30931	0.340227	0.999952
+pH fractionation/SP	P0DMV9	P0DMV9; P34931	AFYPEEISSMVLTK	[K].AFYPEEISSMVLTK.[ML]		0.000605261	1	1	2.6982	2.55682	0.686983	1.02125	-0.141381	0.852	0.958443	1.06687	1.57524	1.66923	0.445937	0.508363	0.637145	0.999952
+pH fractionation/SP	P04040	P04040	AFYVNVLNEEQR	[R].AFYVNVLNEEQR.[K]		3.35083e-05	1	9	0.217212	-0.371715	0.341014	1.66702	-0.588927	0.581151	0.879053	0.537605	-2.18445		0.689852	-2.72206		NA
+pH fractionation/SP	Q5T440	Q5T440	AGAAAILIR	[R].AGAAAILIR.[D]		0.000836425	1	1	-2.64525	-1.70616	1.03684	0.248129	0.939089	0.316895	0.820259	-1.44961						NA
+pH fractionation/SP	O75027-2	O75027-3; O75027-2; O75027	AGAAFFNEVR	[R].AGAAFFNEVR.[N]		6.09156e-05	1	4	-0.351554	-1.53628	1.88489	4.19175	-1.18472	0.678361	0.904722	0.982665	-0.932139	1.4843	4.22837	-1.9148	0.500336	0.999952
+pH fractionation/SP	Q8WW12	Q8WW12; Q8WW12-2	AGAAGGPEEEAEKPVK	[R].AGAAGGPEEEAEKPVK.[T]		0.000114852	1	2	2.2187	1.52347	0.607349	2.94232	-0.695231	0.709046	0.912005	2.94922	2.27039	1.79286	2.22846	-0.678834	0.702077	0.999952
+pH fractionation/SP	Q96C57	Q96C57	AGAANSQLSTSQPSLR	[R].AGAANSQLSTSQPSLR.[H]		0	1	3		-0.257275					NA	0.0425127	-1.51315	0.483908	0.511173	-1.55566	0.0426797	0.999952
+pH fractionation/SP	Q92974	Q92974-3; Q92974-2; Q92974	AGAAPVAPEK	[R].AGAAPVAPEK.[Q]		4.19381e-05	1	5	2.53142	1.5549	0.346007	1.39775	-0.976516	0.299576	0.819326	-0.186777	0.725057	2.36915	0.417177	0.911834	0.643704	0.999952
+pH fractionation/SP	Q01518	Q01518	AGAAPYVQAFDSLLAGPVAEYLK	[K].AGAAPYVQAFDSLLAGPVAEYLK.[I]		0.000177325	1	2	0.733173	2.04317	0.884973	0.506283	1.31	0.0900641	0.818997	2.48099	0.982286	0.571554	1.75483	-1.49871	0.232302	0.999952
+pH fractionation/SP	Q9UJV9	Q9UJV9	AGAASLDVIQEVEYVK	[R].AGAASLDVIQEVEYVK.[E]		0	1	6	-0.759147	-1.31759	0.1624	0.269403	-0.558445	0.0579899	0.818997	-1.63587	-0.523954	1.91689	0.304229	1.11191	0.37723	0.999952
+pH fractionation/SP	Q9UJV9	Q9UJV9	AGAASLDVIQEVEYVKEEAK	[R].AGAASLDVIQEVEYVKEEAK.[M]		0	1	1		-1.21136					NA	-2.94929	-3.23475		0.572804	-0.285463		NA
+pH fractionation/SP	P78371	P78371	AGADEERAETAR	[K].AGADEERAETAR.[L]		6.09156e-05	1	3	-1.74843	-0.839164	0.221537		0.909263		NA	-2.25485	0.243468	2.44867	0.466107	2.49832	0.267965	0.999952
+pH fractionation/SP	P19838-2	P19838-3; P19838-2; P19838	AGADLSLLDR	[R].AGADLSLLDR.[L]		4.19381e-05	1	6	1.20798	2.86264	0.316146	0.979501	1.65467	0.0495897	0.818997	3.05414	2.3372	1.21779	0.744087	-0.716941	0.433333	0.999952
+pH fractionation/SP	O00221	O00221	AGADSLLR	[K].AGADSLLR.[N]		0.00164914	1	1	4.582	3.92766	0.184917	1.05376	-0.654337	0.349175	0.824979	4.53044	4.05531	0.354598	0.51304	-0.475133	0.257441	0.999952
+pH fractionation/SP	P15498	P15498-2; P15498	AGAESILANR	[R].AGAESILANR.[S]		4.19381e-05	1	13	0.0129576	0.150071	0.19344	0.108493	0.137113	0.344577	0.824979	-2.13564	-1.41047	2.18303	0.916916	0.725174	0.623867	0.999952
+pH fractionation/SP	Q6UB35	Q6UB35	AGAFDAVPCYHWSVGGK	[R].AGAFDAVPCYHWSVGGK.[G]	1xCarbamidomethyl [C9]	4.19381e-05	1	2	-2.44804	-1.38758	2.75083	0.886797	1.06046	0.648775	0.897128	-0.275094	0.423745	2.42845	1.36173	0.698839	0.68617	0.999952
+pH fractionation/SP	P61011	P61011-2; P61011	AGAFDQLK	[R].AGAFDQLK.[Q]		0.000246334	1	10	1.25859	-0.0793568	2.84782	2.7009	-1.33795	0.586646	0.880469	1.42285	1.69218	1.68343	0.515935	0.269331	0.847279	0.999952
+pH fractionation/SP	Q00653	Q00653-4; Q00653	AGAGAPELLR	[R].AGAGAPELLR.[A]		4.19381e-05	1	7	1.27267	1.98654	0.220373	1.10294	0.71387	0.333342	0.823688	3.10452	2.82811	1.62847	0.835254	-0.276405	0.806559	0.999952
+pH fractionation/SP	Q9BXP5	Q9BXP5-4; Q9BXP5-5; Q9BXP5-3; Q9BXP5; Q9BXP5-2	AGAGLGDGER	[R].AGAGLGDGER.[K]		4.19381e-05	1	16	0.884886	-0.0801343	0.806456	0.656871	-0.96502	0.183334	0.818997	0.0562676	-1.16999		1.19858	-1.22626		NA
+pH fractionation/SP	Q9NWH9	Q9NWH9; Q9NWH9-3	AGAGMITQHSSNASPINR	[R].AGAGMITQHSSNASPINR.[I]		0	1	6		-2.78718		2.10744			NA	-2.76516	-2.26017	0.843358	0.814617	0.504986	0.554509	0.999952
+pH fractionation/SP	Q9Y5J1	Q9Y5J1	AGAGPGGPPQKPAPSSQR	[K].AGAGPGGPPQKPAPSSQR.[K]		0	1	2	-3.2495	-0.252701	2.25909	3.89804	2.9968	0.410283	0.836782	1.89949	2.76129	3.65404	1.97581	0.8618	0.737511	0.999952
+pH fractionation/SP	P40926	P40926; P40926-2	AGAGSATLSMAYAGAR	[K].AGAGSATLSMAYAGAR.[F]	1xOxidation [M10]	0	1	11	0.221928	0.995397	0.771913	1.17341	0.773469	0.427355	0.839816	-1.70421	0.138015	1.04387		1.84223		NA
+pH fractionation/SP	P40926	P40926; P40926-2	AGAGSATLSMAYAGAR	[K].AGAGSATLSMAYAGAR.[F]		0	1	26	-1.00547	-0.0484441	0.512295	1.76946	0.957022	0.419084	0.83914	1.14567	1.49537	1.91512	0.605774	0.349701	0.778024	0.999952
+pH fractionation/SP	P04406	P04406-2; P04406	AGAHLQGGAK	[K].AGAHLQGGAK.[R]		3.35083e-05	1	39	2.89222	0.137713	0.36185	3.74378	-2.75451	0.260586	0.818997	0.764518	-3.23348	3.61341	0.688275	-3.99799	0.132889	0.999952
+pH fractionation/SP	P04406	P04406-2; P04406	AGAHLQGGAKR	[K].AGAHLQGGAKR.[V]		0	1	18	4.51091	1.76424	0.217998	1.73751	-2.74667	0.0531654	0.818997	1.17725	-1.32051	2.37961	2.16408	-2.49776	0.249816	0.999952
+pH fractionation/SP	P05388; Q8NHW5	P05388; RPLP0_2552_E0; Q8NHW5; P05388-2; RPLP0_2552_I0	AGAIAPCEVTVPAQNTGLGPEK	[R].AGAIAPCEVTVPAQNTGLGPEK.[T]	1xCarbamidomethyl [C7]	0	2	125	5.60593	4.2635	0.743672	2.99366	-1.34243	0.49292	0.856231	3.12935	2.10791	1.94605	1.11679	-1.02144	0.474508	0.999952
+pH fractionation/SP	Q7L1V2	Q7L1V2; Q7L1V2-2	AGAILVVTK	[K].AGAILVVTK.[L]		0.000398881	1	3	-0.636362	0.844718	0.0500555	2.33902	1.48108	0.334445	0.823889	2.42399	2.98523	2.13345	0.526063	0.561246	0.681069	0.999952
+pH fractionation/SP	Q92900	Q92900-2; Q92900	AGAKPDQIGIITPYEGQR	[K].AGAKPDQIGIITPYEGQR.[S]		0	1	7	0.486311	0.190871	1.22335	2.82516	-0.29544	0.876051	0.966186	-0.70657	-1.62785	0.353579	2.07923	-0.921282	0.491413	0.999952
+pH fractionation/SP	Q9BQG0-2	Q9BQG0; Q9BQG0-2	AGALHAQVER	[R].AGALHAQVER.[L]		4.19381e-05	1	7	0.151418	-2.83047	0.185224	0.967247	-2.98189	0.0504471	0.818997	-0.95246	-3.07285	0.784168	3.77655	-2.12039	0.510175	0.999952
+pH fractionation/SP	P06396	P06396-2; P06396; P06396-4; P06396-3	AGALNSNDAFVLK	[K].AGALNSNDAFVLK.[T]		4.19381e-05	1	4	-2.3144	0.644849		5.42953	2.95924		NA	5.2755	6.80343	0.406403	0.604498	1.52793	0.0548773	0.999952
+pH fractionation/SP	Q9Y490	Q9Y490	AGALQCSPSDAYTK	[K].AGALQCSPSDAYTK.[K]	1xCarbamidomethyl [C6]	3.35083e-05	1	12	-4.25854	-0.626784	1.52244		3.63176		NA	-3.50247	-2.67136	0.745737	1.35186	0.83111	0.525999	0.999952
+pH fractionation/SP	P53350	P53350	AGANITPR	[K].AGANITPR.[E]		0.000387362	1	2	2.39494	2.52637	0.994385	0.211804	0.131435	0.871967	0.964773	1.42667	-0.123698	1.46138	0.297363	-1.55036	0.253645	0.999952
+pH fractionation/SP	P78362-2	P78362-2; P78362	AGAPPPSGSAVSTAPQQKPIGK	[K].AGAPPPSGSAVSTAPQQKPIGK.[I]		4.19381e-05	1	1	1.1219	-1.49527	0.521548	3.57967	-2.61717	0.278419	0.819124	-3.05454	-2.45358	1.37658	2.00661	0.600964	0.710747	0.999952
+pH fractionation/SP	P28065	P28065	AGAPTGDLPR	[R].AGAPTGDLPR.[A]		9.74898e-05	1	7	2.96046	2.33132	0.208274		-0.629146		NA	-1.03526	-1.17713	3.8394		-0.141872		NA
+pH fractionation/SP	Q6ZRS2	Q6ZRS2-2; Q6ZRS2-3; Q6ZRS2	AGAPVGGSPGLAK	[R].AGAPVGGSPGLAK.[R]		0.000224101	1	2	-1.56107	-1.67318		1.92434	-0.112108		NA	-1.78922	-0.576898	0.540685		1.21233		NA
+pH fractionation/SP	Q9BUE0	Q9BUE0	AGAPWHLR	[R].AGAPWHLR.[Y]		0.00448514	1	1	-2.29831	-0.901753	0.766306	1.62984	1.39656	0.268752	0.818997	0.96136	0.380807	0.685354	1.21616	-0.580552	0.593762	0.999952
+pH fractionation/SP	Q9UJW0	Q9UJW0; Q9UJW0-3; Q9UJW0-2	AGASISTLAGLSLK	[R].AGASISTLAGLSLK.[E]		4.19381e-05	1	2	3.1393	2.72307	0.125739	1.51484	-0.416233	0.660027	0.899802	1.76919	1.87193	1.20665	0.868963	0.102739	0.910513	0.999952
+pH fractionation/SP	Q9NX00	Q9NX00	AGASPPPVSELDR	[R].AGASPPPVSELDR.[A]		0.00293042	1	3	3.0703	2.46116	0.579366	0.242652	-0.609139	0.269123	0.818997	2.67209	3.58651	1.96605	0.342499	0.914416	0.579557	0.999952
+pH fractionation/SP	P16278	P16278-3; P16278; P16278-2	AGATLDLLVENMGR	[K].AGATLDLLVENMGR.[V]		0.000877399	1	2	-5.34614	-1.66795		2.02286	3.67819		NA	-2.24544	-1.4391	1.85076	0.906979	0.806332	0.635665	0.999952
+pH fractionation/SP	Q96LJ7	Q96LJ7	AGATVYITGR	[K].AGATVYITGR.[H]		0.00773251	1	1	1.22773	1.98666	0.556478	0.941448	0.758929	0.295663	0.819326	1.21261	2.48288	0.82924	0.926257	1.27028	0.151484	0.999952
+pH fractionation/SP	Q9BY50	Q9BY50	AGAVGAHLPASGLDIFGDLK	[R].AGAVGAHLPASGLDIFGDLK.[K]		0	1	5	-0.759539	-2.49341	0.147469	1.70965	-1.73387	0.289239	0.819326	-3.07338	-3.56725			-0.493866		NA
+pH fractionation/SP	Q9Y678	Q9Y678	AGAVSALAK	[R].AGAVSALAK.[F]		0.000246334	1	4	-2.11347	-1.09131	0.528407	2.02487	1.02216	0.43511	0.84138	-0.60222		0.524582				NA
+pH fractionation/SP	Q13557-11; Q13555-6	Q13557-6; Q13555-9; Q13557-4; Q13557-10; Q13554-8; Q13555-3; Q13557-8; Q13554-6; Q13557-11; Q9UQM7; Q13555-11; Q13555-4; Q13555-5; Q13557-12; Q13555-2; Q13557-5; Q13557; Q13555-8; Q13554-4; Q13555-10; Q9UQM7-2; Q13555-7; Q13554-7; Q13557-9; Q13554-5; Q13557-3; Q13554-3; Q13555-6; Q13555; Q13554; Q13554-2	AGAYDFPSPEWDTVTPEAK	[K].AGAYDFPSPEWDTVTPEAK.[DN]		0.00164914	2	2	-2.08478	-0.73198	0.94017	1.5861	1.3528	0.368745	0.829318	0.64666	1.20632	0.977184	0.408288	0.559665	0.411812	0.999952
+pH fractionation/SP	O60610	O60610; O60610-3; O60610-2	AGCAVTSLLASELTK	[K].AGCAVTSLLASELTK.[D]	1xCarbamidomethyl [C3]	0	1	14	-0.0522771	-1.12261	0.578741	1.65739	-1.07033	0.462019	0.849403	-2.55818	-3.20052	2.01884	1.53038	-0.642334	0.754224	0.999952
+pH fractionation/SP	Q5MIZ7; Q6IN85	Q5MIZ7-3; Q6IN85-2; Q5MIZ7; Q6IN85; Q5MIZ7-2; Q6IN85-5	AGCDEIWEK	[K].AGCDEIWEK.[I]	1xCarbamidomethyl [C3]	0.000177325	2	1	-2.31361		0.823736				NA	-1.5444						NA
+pH fractionation/SP	O43396	O43396	AGCECLNESDEHGFDNCLRK	[K].AGCECLNESDEHGFDNCLRK.[D]	3xCarbamidomethyl [C3; C5; C17]	0.000177325	1	2	-1.18365		0.144616				NA	-2.20646						NA
+pH fractionation/SP	P29017	P29017	AGCELHSGK	[K].AGCELHSGK.[S]	1xCarbamidomethyl [C3]	0.000177325	1	1	-3.67295	-1.87289	1.10503		1.80006		NA	-2.68613	-1.44048	0.310217	0.469407	1.24565	0.0347934	0.999952
+pH fractionation/SP	O00214-2	O00214-2; O00214	AGCIVCNTLINEK	[R].AGCIVCNTLINEK.[W]	2xCarbamidomethyl [C3; C6]	4.19381e-05	1	1		-0.235593					NA	1.57583	0.769007	1.73694	1.16768	-0.80682	0.640307	0.999952
+pH fractionation/SP	P21580	P21580	AGCVYFGTPENK	[K].AGCVYFGTPENK.[G]	1xCarbamidomethyl [C3]	0.000420983	1	1		-0.949389		4.6039			NA	1.71553	1.5078	0.334464	0.346835	-0.207725	0.604108	0.999952
+pH fractionation/SP	Q14160-3	Q14160-2; Q14160-3; Q14160	AGDAGIFVSR	[R].AGDAGIFVSR.[I]		4.19381e-05	1	2	-1.2849		0.995956				NA	-1.23955	-2.60416	1.18551	0.701285	-1.36461	0.249455	0.999952
+pH fractionation/SP	Q86UX7	Q86UX7; Q86UX7-2	AGDALWLR	[K].AGDALWLR.[F]		0.000224101	1	15	0.551561	2.41274	1.22243	1.94531	1.86118	0.233242	0.818997	0.884181	1.78255	2.72525	2.0094	0.898371	0.669704	0.999952
+pH fractionation/SP	Q9Y6K1	Q9Y6K1-2; Q9Y6K1	AGDDEPEYEDGR	[K].AGDDEPEYEDGR.[G]		6.09156e-05	1	4		-2.15445		1.34942			NA	-1.70039	-0.745448	1.88695	0.630798	0.954941	0.452535	0.999952
+pH fractionation/SP	Q16836-2	Q16836; Q16836-3; Q16836-2	AGDEFVEK	[K].AGDEFVEK.[T]		0.00073701	1	10	0.945383	-1.20865	0.622578	0.910399	-2.15403	0.0483266	0.818997	-2.12938	-1.33539	1.37401	0.75855	0.793989	0.522373	0.999952
+pH fractionation/SP	Q96F86	Q96F86	AGDITELK	[R].AGDITELK.[I]		0.00108831	1	1	0.428172						NA	-1.37735	-2.01432	3.13615	0.340465	-0.636972	0.802075	0.999952
+pH fractionation/SP	P21912	P21912	AGDKPHMQTYEVDLNK	[K].AGDKPHMQTYEVDLNK.[C]		0	1	9	-0.682321	0.459915	0.910429	1.20922	1.14224	0.307345	0.819326	1.07981	0.914002	1.35952	0.872995	-0.165812	0.867554	0.999952
+pH fractionation/SP	Q9BRR8	Q9BRR8	AGDLGEIGLNK	[R].AGDLGEIGLNK.[G]		4.19381e-05	1	1	-2.72911	-3.60394	0.926302		-0.874826		NA	-1.02905						NA
+pH fractionation/SP	P51858	P51858-3; P51858-2; P51858	AGDLLEDSPK	[R].AGDLLEDSPK.[R]		4.19381e-05	1	8	-1.49342		0.489656				NA	-1.50324		0.809023				NA
+pH fractionation/SP	Q9UPU5	Q9UPU5	AGDLLLR	[R].AGDLLLR.[H]		0.00073701	1	5	-1.25329	-0.93923	0.228402	1.12953	0.314064	0.64693	0.896405	-1.15452	-0.347458	1.04065	0.138034	0.807058	0.376405	0.999952
+pH fractionation/SP	P12956	P12956; P12956-2	AGDLRDTGIFLDLMHLK	[K].AGDLRDTGIFLDLMHLK.[K]		4.19381e-05	1	1	1.83023	1.72907	0.28462		-0.101154		NA	0.62136	-2.76605	1.88985	3.32324	-3.38741	0.294013	0.999952
+pH fractionation/SP	Q9Y3E1	Q9Y3E1	AGDLVFAK	[K].AGDLVFAK.[M]		0.000246334	1	4	-2.67692	-1.75378	2.68116	0.571919	0.92314	0.591036	0.881062	-2.36139	-2.26729	1.56028	1.0192	0.0941037	0.946064	0.999952
+pH fractionation/SP	P42704	P42704	AGDMENAENILTVMR	[R].AGDMENAENILTVMR.[D]		0	1	9	-1.11282	-1.92953	0.13755	1.02738	-0.816711	0.234954	0.818997	-0.993006	-3.62547		1.90045	-2.63247		NA
+pH fractionation/SP	P42704	P42704	AGDMENAENILTVMR	[R].AGDMENAENILTVMR.[D]	1xOxidation [M4]	0.00223086	1	1	0.291176	-0.0180908	1.00614	0.958691	-0.309266	0.719532	0.915599	-0.141737	-0.337672	2.55024	0.391751	-0.195935	0.924279	0.999952
+pH fractionation/SP	Q00403	Q00403	AGDMICPECGLVVGDR	[R].AGDMICPECGLVVGDR.[V]	2xCarbamidomethyl [C6; C9]	4.19381e-05	1	3	1.63616	3.26516	2.55907	0.633199	1.629	0.461973	0.849403	0.338786	0.0881272	2.645	1.11217	-0.250659	0.910707	0.999952
+pH fractionation/SP	Q9Y320	Q9Y320; Q9Y320-2	AGDNIPEEQPVASTPTTVSDGENK	[K].AGDNIPEEQPVASTPTTVSDGENK.[K]		0.00856563	1	1	-3.14287		1.80486				NA	-0.341537	-2.49841			-2.15687		NA
+pH fractionation/SP	Q9Y320	Q9Y320; Q9Y320-2	AGDNIPEEQPVASTPTTVSDGENKKDK	[K].AGDNIPEEQPVASTPTTVSDGENKKDK.[-]		3.35083e-05	1	1	-4.97973	0.833936	0.00169674		5.81366		NA	-3.12096	-1.00195	1.21243	2.07172	2.11901	0.338204	0.999952
+pH fractionation/SP	Q9UIF9	Q9UIF9-3; Q9UIF9; Q9UIF9-2	AGDPGEMPQSPTGLGQPK	[R].AGDPGEMPQSPTGLGQPK.[R]		4.19381e-05	1	1	-4.41624	-2.5781		2.84803	1.83814		NA	0.208792	-0.406542	1.37633	0.899514	-0.615334	0.649498	0.999952
+pH fractionation/SP	Q14980-2; Q14980	NUMA1_2515_I0; Q14980-3; Q14980-2; Q14980-4; Q14980; NUMA1_2515_E0	AGDRQPEWLEEQQGR	[R].AGDRQPEWLEEQQGR.[Q]		4.19381e-05	2	2	4.0174	2.88743	0.22792	2.7851	-1.12997	0.522286	0.862487	1.3943	0.487104	2.19382	0.600382	-0.907193	0.527666	0.999952
+pH fractionation/SP	P11766	P11766	AGDTVIPLYIPQCGECK	[K].AGDTVIPLYIPQCGECK.[F]	2xCarbamidomethyl [C13; C16]	0	1	13	-1.51497	-0.811251	0.232584	0.943493	0.703723	0.273763	0.818997	-1.55213	-1.41612	0.945859	0.20365	0.136012	0.860917	0.999952
+pH fractionation/SP	Q9NZT2	Q9NZT2; Q9NZT2-2	AGEAAELQDAEVESSAK	[K].AGEAAELQDAEVESSAK.[S]		0	1	1	-3.17738	0.635183	3.08804		3.81256		NA	1.6474	0.551753	0.783278	0.432637	-1.09565	0.225481	0.999952
+pH fractionation/SP	P16989; P16989-2	P16989; P16989-2	AGEAPTENPAPPTQQSSAE	[K].AGEAPTENPAPPTQQSSAE.[-]		3.35083e-05	2	4	0.729138	0.235753	1.14898	2.06595	-0.493385	0.736013	0.920573	-3.3865	-3.97595	3.20569	1.64864	-0.589449	0.79106	0.999952
+pH fractionation/SP	Q6ZRP7	Q6ZRP7	AGEDAVWVLDSGSVR	[R].AGEDAVWVLDSGSVR.[G]		0.00126067	1	2	-2.92467	-1.57429	2.29092	1.99071	1.35038	0.593486	0.881831	-1.79187	-0.982289	0.818537	1.52046	0.80958	0.480297	0.999952
+pH fractionation/SP	Q96S55	Q96S55; Q96S55-4; Q96S55-3; Q96S55-2	AGEEHYNCISALHK	[R].AGEEHYNCISALHK.[S]	1xCarbamidomethyl [C8]	4.19381e-05	1	3	-1.40624	-1.2613	0.47887	0.944548	0.144942	0.828188	0.949429	-1.94807	-1.04383	1.56138	0.530898	0.904238	0.504878	0.999952
+pH fractionation/SP	A8MW92; A8MW92-2	A8MW92-4; A8MW92; A8MW92-2	AGEEVLAR	[K].AGEEVLAR.[W]		0.000579178	2	3	-3.02166	-1.56441	0.368122		1.45725		NA	-1.58536	-0.630616	1.10776	0.637004	0.954741	0.294043	0.999952
+pH fractionation/SP	O00541	O00541; O00541-2	AGEGTYALDSESCMEK	[K].AGEGTYALDSESCMEK.[L]	1xCarbamidomethyl [C13]	3.35083e-05	1	1	-2.67836	-0.055687	1.41416	3.09708	2.62268	0.389748	0.832381	0.715839	2.25301	2.39585	0.796895	1.53717	0.351144	0.999952
+pH fractionation/SP	Q9Y5B8	Q9Y5B8; Q9Y5B8-2	AGEIIEIINK	[K].AGEIIEIINK.[A]		4.19381e-05	1	7	-0.754078	-0.103475	0.471863	1.20778	0.650603	0.43386	0.841269	0.277295	1.14785	1.6234	0.764963	0.870551	0.44808	0.999952
+pH fractionation/SP	Q92783	Q92783-2; Q92783	AGEIITVLDDSDPNWWK	[K].AGEIITVLDDSDPNWWK.[G]		0.000261709	1	1	0.330457	-2.46133	0.881651	2.45481	-2.79178	0.150065	0.818997	-3.26146	-3.3142	1.89203	0.439566	-0.0527484	0.972854	0.999952
+pH fractionation/SP	Q9BY50	Q9BY50	AGEIVVFK	[R].AGEIVVFK.[V]		0.00069846	1	8	-3.37248	-0.102642			3.26984		NA	0.376328	-0.611878	0.359082	0.81717	-0.988206	0.21906	0.999952
+pH fractionation/SP	P62269	P62269	AGELTEDEVER	[R].AGELTEDEVER.[V]		3.35083e-05	1	26	4.23492	2.64371	0.86082	2.81735	-1.59121	0.402471	0.835161	3.56813	2.4706	1.3605	2.40007	-1.09754	0.528679	0.999952
+pH fractionation/SP	P62269	P62269	AGELTEDEVERVITIMQNPR	[R].AGELTEDEVERVITIMQNPR.[Q]		0.00553308	1	1	-1.72947	2.23102			3.9605		NA	-0.00772647	2.25157	2.6715	0.256923	2.2593	0.339932	0.999952
+pH fractionation/SP	P11388-4	P11388; P11388-2; P11388-3; P11388-4	AGEMELKPFNGEDYTCITFQPDLSK	[R].AGEMELKPFNGEDYTCITFQPDLSK.[F]	1xCarbamidomethyl [C16]	0	1	2	-0.787992	0.855848	0.0762693	3.46189	1.64384	0.571147	0.876043	1.39776	1.7819	0.609338	0.472401	0.384142	0.436827	0.999952
+pH fractionation/SP	Q9UJ70-2	Q9UJ70; Q9UJ70-2	AGEMLGR	[K].AGEMLGR.[H]		0.00579457	1	4	-0.805744	-2.47654	0.304803	1.53757	-1.67079	0.141338	0.818997	-1.09967	-2.64424			-1.54456		NA
+pH fractionation/SP	Q9NZW5	Q9NZW5	AGEPLGVTFR	[R].AGEPLGVTFR.[V]		0.000518173	1	2	-2.09628	-2.15907	0.615547	0.691553	-0.0627965	0.932328	0.9817	-2.53539	-2.23514	0.936504	0.718122	0.300257	0.730497	0.999952
+pH fractionation/SP	Q08J23	Q08J23-3; Q08J23; Q08J23-2	AGEPNSPDAEEANSPDVTAGCDPAGVHPPR	[R].AGEPNSPDAEEANSPDVTAGCDPAGVHPPR.[-]	1xCarbamidomethyl [C21]	0	1	4	1.34893	-0.4135	0.428837	1.73435	-1.76243	0.162701	0.818997	0.327352	-0.132589	1.01374	2.24539	-0.459941	0.762621	0.999952
+pH fractionation/SP	P19174-2	P19174; P19174-2	AGERPELCR	[R].AGERPELCR.[V]	1xCarbamidomethyl [C8]	0.000476102	1	2	0.242191	-3.59049	0.229261		-3.83268		NA	-3.14121						NA
+pH fractionation/SP	Q13627	Q13627-4; Q13627-3; Q13627-5; Q13627; Q13627-2	AGESGHTVADYLK	[R].AGESGHTVADYLK.[F]		4.19381e-05	1	7	-2.35725	-3.3653	2.95746	0.827846	-1.00805	0.600082	0.884107	-0.0389453	-2.75448		1.51831	-2.71553		NA
+pH fractionation/SP	Q08257	Q08257-3; Q08257; Q08257-2	AGESVLVHGASGGVGLAACQIAR	[K].AGESVLVHGASGGVGLAACQIAR.[A]	1xCarbamidomethyl [C19]	0	1	4	-1.95653	-1.89323	0.404962		0.0632979		NA	-4.43306						NA
+pH fractionation/SP	P51784	P51784	AGESWFLVEK	[R].AGESWFLVEK.[H]		4.19381e-05	1	7	-1.10567	-0.27041	0.539016	2.2424	0.835255	0.564496	0.8747	-0.178836	-0.890054		0.899171	-0.711218		NA
+pH fractionation/SP	Q9NWZ5	Q9NWZ5-4; Q9NWZ5	AGETMEPALR	[R].AGETMEPALR.[A]		0.00522292	1	4	-1.07976	-2.76476	0.322937		-1.685		NA							NA
+pH fractionation/SP	Q15233	Q15233; Q15233-2	AGEVFIHK	[K].AGEVFIHK.[D]		0.000177325	1	50	0.944636	-0.351582	0.559574	2.07551	-1.29622	0.355249	0.826908	-2.392	-3.24428	3.53497	2.54233	-0.852279	0.751643	0.999952
+pH fractionation/SP	Q15233	Q15233; Q15233-2	AGEVFIHKDK	[K].AGEVFIHKDK.[G]		0.000114852	1	5	-0.152362	0.266175	0.332073	1.25234	0.418537	0.605652	0.88555	1.22379	2.16402	1.72763	0.696065	0.940234	0.431287	0.999952
+pH fractionation/SP	Q86W56	Q86W56; Q86W56-3; Q86W56-2	AGEVPKPFPTHYK	[R].AGEVPKPFPTHYK.[D]		0.0049861	1	1	-1.08597	-0.761094	2.26361		0.324877		NA	-1.79541	-2.06435	1.53198	1.10258	-0.268936	0.847189	0.999952
+pH fractionation/SP	Q02252	Q02252; Q02252-2	AGEYIFER	[K].AGEYIFER.[G]		0.000246334	1	4	0.402191	0.990553	0.176246	1.40629	0.588362	0.511889	0.86091	-1.38577	-1.56971	1.82232	3.31281	-0.183946	0.938967	0.999952
+pH fractionation/SP	P60709; P62736; P68133	A5A3E0; P63267; P0CG39; P60709; P63267-2; Q6S8J3; P62736; P68133; P0CG38; P68032; P63261	AGFAGDDAPR	[K].AGFAGDDAPR.[A]		4.19381e-05	3	315	3.0614	2.46659	0.519602	0.299279	-0.59481	0.295752	0.819326	2.53826	2.95256	2.06045	0.093108	0.414296	0.803068	0.999952
+pH fractionation/SP	P61163; P42025	P61163; P42025	AGFAGDQIPK	[K].AGFAGDQIPK.[Y]		4.19381e-05	2	15	-0.865227	-3.3344	0.125911	2.14256	-2.46917	0.117096	0.818997	-3.53438	-4.45337	3.1191	2.17098	-0.918989	0.716995	0.999952
+pH fractionation/SP	Q9UFC0	Q9UFC0	AGFCCGVIR	[R].AGFCCGVIR.[A]	2xCarbamidomethyl [C4; C5]	0.00832108	1	1	-2.82454	-1.12419	0.921118	2.75395	1.70034	0.367326	0.829318	-0.667444	-1.91557	0.717623	0.0962549	-1.24813	0.102799	0.999952
+pH fractionation/SP	Q9NVH1	Q9NVH1-3; Q9NVH1-2; Q9NVH1	AGFFGTVVEYGAER	[K].AGFFGTVVEYGAER.[K]		0	1	13	-1.44948	-2.09156	0.125499	0.75384	-0.642076	0.356728	0.827497		-1.50459					NA
+pH fractionation/SP	Q93009	Q93009; Q93009-3	AGFIQDTSLILYEEVKPNLTER	[R].AGFIQDTSLILYEEVKPNLTER.[I]		0	1	4	0.980182	0.689481	0.196029	1.66588	-0.290701	0.778995	0.934153	0.583792	-1.38126	0.480297	1.37525	-1.96505	0.0796843	0.999952
+pH fractionation/SP	Q9Y490	Q9Y490	AGFLDLK	[K].AGFLDLK.[D]		0.000877399	1	23	0.0695781	1.23162	0.536697	0.616772	1.16204	0.0695593	0.818997	0.395014	-0.0306854	0.582469	1.23241	-0.4257	0.62373	0.999952
+pH fractionation/SP	Q86XL3	Q86XL3; Q86XL3-2	AGFLHHVK	[K].AGFLHHVK.[K]		0.00124955	1	1	-3.12166	-0.286489	0.23059	3.13243	2.83517	0.329946	0.822316	0.117631	1.33549	2.41449	1.03184	1.21786	0.466792	0.999952
+pH fractionation/SP	A3KN83	Q9Y2G9-3; A3KN83-3; A3KN83-2; Q9Y2G9; A3KN83; A3KN83-4	AGFLIGDGAGVGK	[R].AGFLIGDGAGVGK.[G]		4.19381e-05	1	3	0.48526	-0.739893	0.353949	2.51399	-1.22515	0.450265	0.846422	-3.42121	-1.99306	0.770687	0.714147	1.42815	0.122669	0.999952
+pH fractionation/SP	P98170	P98170; XIAP_5689_I0	AGFLYTGEGDTVR	[R].AGFLYTGEGDTVR.[C]		0.000346548	1	4	-0.986742	-1.61926	1.18017	3.26906	-0.632521	0.768357	0.931298	-2.31765	-2.9573	2.29936	2.9342	-0.639652	0.781108	0.999952
+pH fractionation/SP	O15234	O15234	AGFRPVEAGGQHGGR	[R].AGFRPVEAGGQHGGR.[S]		0	1	1	-1.83281	-1.60987	0.967175	0.871928	0.22294	0.811141	0.944964	-1.47895	-1.861	3.92633		-0.382051		NA
+pH fractionation/SP	P11717	P11717	AGFTAAYSEK	[R].AGFTAAYSEK.[G]		0.000420983	1	6	4.62661	2.4963	0.744301	3.69281	-2.13031	0.382797	0.831052	4.48417	3.48095	1.6426	3.21442	-1.00323	0.655405	0.999952
+pH fractionation/SP	Q9H0A0	Q9H0A0-2; Q9H0A0	AGFVPVYLR	[R].AGFVPVYLR.[Q]		0.000224101	1	18	0.845794	0.714154	0.348377	0.797397	-0.13164	0.806243	0.943006	1.20898	0.65347	1.5836	1.00567	-0.555509	0.635048	0.999952
+pH fractionation/SP	P29350-4	P29350; P29350-3; P29350-4; P29350-2	AGFWEEFESLQK	[K].AGFWEEFESLQK.[Q]		4.19381e-05	1	2	3.68151	1.03288	0.900922	3.47322	-2.64863	0.267463	0.818997	-0.969655	-0.476696	3.39708		0.492958		NA
+pH fractionation/SP	Q9P258	Q9P258	AGGAAVVITEPEHTK	[K].AGGAAVVITEPEHTK.[E]		0	1	45	2.67565	0.553259	0.189318	0.310804	-2.12239	0.000540492	0.436786	1.31478	0.62964	1.08602	0.284769	-0.685144	0.350131	0.999952
+pH fractionation/SP	Q9P258	Q9P258	AGGAAVVITEPEHTKER	[K].AGGAAVVITEPEHTKER.[V]		0	1	6	7.72625	5.20222	1.29683	2.07333	-2.52403	0.148352	0.818997	4.27416	2.91834	2.69238	1.72786	-1.35582	0.50362	0.999952
+pH fractionation/SP	Q9H223	Q9H223	AGGADAVQTVTGGLR	[R].AGGADAVQTVTGGLR.[S]		3.35083e-05	1	9	-2.24142	-1.09999	0.554811	1.24805	1.14142	0.23814	0.818997	-0.996591	0.961147	1.63107	0.158895	1.95774	0.206511	0.999952
+pH fractionation/SP	P55809	P55809	AGGAGVPAFYTPTGYGTLVQEGGSPIK	[R].AGGAGVPAFYTPTGYGTLVQEGGSPIK.[Y]		0	1	7	-0.739796	-1.43493	0.699305	1.86128	-0.695138	0.577494	0.878305	-0.0423333	-0.211586	0.668324	0.424986	-0.169253	0.730041	0.999952
+pH fractionation/SP	P55809	P55809	AGGAGVPAFYTPTGYGTLVQEGGSPIKYNK	[R].AGGAGVPAFYTPTGYGTLVQEGGSPIKYNK.[D]		0	1	2	-4.04003	-0.946459	1.56483	0.834884	3.09358	0.0579328	0.818997	-2.09217	-1.97782	2.5631		0.114345		NA
+pH fractionation/SP	Q92922	Q92922	AGGALCHILGAAYK	[K].AGGALCHILGAAYK.[Y]	1xCarbamidomethyl [C6]	0	1	20	-3.07716	-0.358824			2.71834		NA	-0.528516	-0.209505	1.91095	0.178507	0.319011	0.836035	0.999952
+pH fractionation/SP	Q32MZ4-3	Q32MZ4-2; Q32MZ4; Q32MZ4-3	AGGEELDEGVAK	[R].AGGEELDEGVAK.[D]		0	1	4	-0.8493	-0.907513	0.867256	0.703064	-0.0582126	0.932381	0.981724	-2.37617	-1.72367		0.0802344	0.6525		NA
+pH fractionation/SP	Q8N163	Q8N163; Q8N163-2	AGGEPWGAK	[R].AGGEPWGAK.[K]		0.000114852	1	15	-1.316	-3.97941	0.665376	2.30187	-2.66341	0.225621	0.818997	-3.73308	-3.89816	3.14161	0.874092	-0.165077	0.949442	0.999952
+pH fractionation/SP	Q9Y2Q9	Q9Y2Q9	AGGFASALER	[R].AGGFASALER.[H]		0.000192563	1	2	2.17956	1.38296	0.347085	2.035	-0.796599	0.540495	0.867961	-1.1134	-0.228132	2.75464	0.475129	0.885272	0.612501	0.999952
+pH fractionation/SP	Q8IXQ6	Q8IXQ6-2; Q8IXQ6; Q8IXQ6-3	AGGFEIQEESK	[K].AGGFEIQEESK.[Q]		0.00510546	1	1	-4.16541	-1.12977	2.16248	2.86474	3.03564	0.216816	0.818997	1.2665	1.79422	2.31337	0.20984	0.527726	0.714024	0.999952
+pH fractionation/SP	P00558	P00558-2; P00558	AGGFLMK	[K].AGGFLMK.[K]	1xOxidation [M6]	0.00192047	1	26	0.682311	1.07009	0.869121	1.05036	0.387778	0.679971	0.904835	0.60389	1.30068	0.562687		0.696792		NA
+pH fractionation/SP	P00558	P00558-2; P00558	AGGFLMK	[K].AGGFLMK.[K]		0.0021851	1	41	-2.19764	-2.33635	2.32924	2.36752	-0.138713	0.945804	0.984705	0.335069	-0.224951	0.823734	0.534574	-0.56002	0.412043	0.999952
+pH fractionation/SP	P00558	P00558-2; P00558	AGGFLMKK	[K].AGGFLMKK.[E]		0.00198804	1	3	2.09689	1.72179	1.2297	1.60001	-0.375104	0.763609	0.929119	-0.342751	-0.383774	0.624197	2.64066	-0.0410222	0.98489	0.999952
+pH fractionation/SP	O95602	O95602	AGGFVTGR	[R].AGGFVTGR.[F]		0.00140139	1	4	0.117895	0.651068	0.841758	1.66988	0.533173	0.647314	0.896525	2.28582	2.12715	1.12868	0.200913	-0.158661	0.863505	0.999952
+pH fractionation/SP	Q9HAV4	Q9HAV4	AGGFVVGYTSSGNPIFR	[K].AGGFVVGYTSSGNPIFR.[N]		4.19381e-05	1	2	1.0106	0.259039	0.506375	1.04479	-0.751557	0.324967	0.82068	1.6537	-0.481863	0.56604	0.620714	-2.13556	0.0116623	0.999952
+pH fractionation/SP	Q8TD19	Q8TD19	AGGGAAEQEELHYIPIR	[R].AGGGAAEQEELHYIPIR.[V]		0	1	9	-0.498118	0.403668	0.47443	1.17128	0.901786	0.284084	0.819124	1.47084	1.46824	0.439902	0.598899	-0.00259127	0.99547	0.999952
+pH fractionation/SP	Q5VTL8	Q5VTL8	AGGGCVMTIGEMLR	[K].AGGGCVMTIGEMLR.[S]	1xCarbamidomethyl [C5]	0	1	5	0.651262	-1.21604	0.489392	2.43767	-1.8673	0.263196	0.818997	-2.15472	-1.39653	4.09727	0.0822138	0.758189	0.818077	0.999952
+pH fractionation/SP	Q5JTZ9	Q5JTZ9	AGGHHNDLEDVGR	[R].AGGHHNDLEDVGR.[D]		4.19381e-05	1	1	-3.94656		0.34855				NA	-1.06439		1.20974				NA
+pH fractionation/SP	Q92598	Q92598-3; Q92598-2; Q92598	AGGIETIANEFSDR	[R].AGGIETIANEFSDR.[C]		0	1	31	3.44477	3.06909	0.472137	1.05618	-0.375675	0.603842	0.885377	3.99424	3.77104	1.24584	1.29927	-0.223199	0.840455	0.999952
+pH fractionation/SP	P34932	P34932-2; P34932	AGGIETIANEYSDR	[R].AGGIETIANEYSDR.[C]		0	1	33	1.07818	0.0698148	0.728348	0.970924	-1.00836	0.223561	0.818997	0.778006	-0.410756	0.777336	1.87456	-1.18876	0.367673	0.999952
+pH fractionation/SP	Q9Y296	Q9Y296-2; Q9Y296	AGGLIYQLDSYAPR	[K].AGGLIYQLDSYAPR.[A]		3.35083e-05	1	6	-2.99141	-4.66644	0.916778		-1.67503		NA	-1.80445	-1.15647	0.622906	0.416754	0.647981	0.296269	0.999952
+pH fractionation/SP	Q03252	Q03252	AGGPATPLSPTR	[R].AGGPATPLSPTR.[L]		4.19381e-05	1	16	0.8849	1.00409	0.421569	0.631187	0.119186	0.799102	0.940284	1.077	0.770682	1.03119	1.55519	-0.306316	0.790272	0.999952
+pH fractionation/SP	Q14166	Q14166	AGGPEGPPWLPR	[R].AGGPEGPPWLPR.[T]		6.09156e-05	1	8	1.9712	0.448689	0.537034	0.394825	-1.52251	0.0432569	0.818997	0.111984	-0.765842	2.12237	0.783756	-0.877826	0.628595	0.999952
+pH fractionation/SP	O75369-8; P21333	O75369-9; O75369-2; O75369-8; P21333; O75369-7; P21333-2; O75369-6; O75369; O75369-3	AGGPGLER	[R].AGGPGLER.[GA]		0.000950814	2	14	1.54054	-0.146101	1.09444	1.35934	-1.68664	0.16945	0.818997	-3.3474	-1.68112	0.29744	1.06981	1.66627	0.13271	0.999952
+pH fractionation/SP	P20700	P20700	AGGPTTPLSPTR	[R].AGGPTTPLSPTR.[L]		3.35083e-05	1	28	-1.87604	-1.01733	0.637716	1.30473	0.858714	0.491019	0.855936	-2.26578	-1.3879	1.92651	0.930213	0.877879	0.526759	0.999952
+pH fractionation/SP	P20700	P20700	AGGPTTPLSPTRLSR	[R].AGGPTTPLSPTRLSR.[L]		0.00223086	1	1		1.76665		0.227848			NA	1.68677		1.5754				NA
+pH fractionation/SP	Q9NU22	Q9NU22	AGGQINHDLHER	[K].AGGQINHDLHER.[L]		4.19381e-05	1	3	-3.99976	-1.01048	0.0141796	2.71288	2.98928	0.259491	0.818997	0.822765	-1.04355	1.35023	0.0035362	-1.86632	0.189803	0.999952
+pH fractionation/SP	Q92522	Q92522	AGGSAALSPSK	[K].AGGSAALSPSK.[K]		3.35083e-05	1	5		1.03155					NA	2.44009	0.925843		1.16617	-1.51425		NA
+pH fractionation/SP	P20618	P20618	AGGSASAMLQPLLDNQVGFK	[K].AGGSASAMLQPLLDNQVGFK.[N]		0	1	21	0.273835	0.0191861	0.319725	1.42699	-0.254649	0.77798	0.933929	-0.0205925	-0.80277		0.259232	-0.782177		NA
+pH fractionation/SP	P20618	P20618	AGGSASAMLQPLLDNQVGFK	[K].AGGSASAMLQPLLDNQVGFK.[N]	1xOxidation [M8]	0	1	5	-2.2186	-1.31785	0.229763	1.35957	0.900749	0.44245	0.843493	0.510448	0.568347	0.803318	0.622155	0.0578989	0.926126	0.999952
+pH fractionation/SP	O43760-2	O43760; O43760-2	AGGSFDLR	[K].AGGSFDLR.[R]		0.000553704	1	9	-1.63063	-1.57876	1.0252	0.848296	0.0518735	0.949407	0.985441	-1.25456	-1.90858	0.893291	0.266297	-0.654024	0.291086	0.999952
+pH fractionation/SP	Q9ULI0	Q9ULI0-2; Q9ULI0	AGGSGGAGVTLDEAR	[K].AGGSGGAGVTLDEAR.[K]		3.35083e-05	1	1	-2.3787	-1.09459	0.703962	1.04508	1.28411	0.152306	0.818997	-2.40042	-1.54378	0.865631	0.493853	0.856634	0.30594	0.999952
+pH fractionation/SP	P16403	P16403	AGGTKPKKPVGAAK	[K].AGGTKPKKPVGAAK.[K]		3.35083e-05	1	4	1.73912	1.03856	0.536928	0.344139	-0.700565	0.209103	0.818997	0.729903	1.04339	1.70205	0.690538	0.313486	0.827547	0.999952
+pH fractionation/SP	Q8NBX0	Q8NBX0	AGGVFTPGAAFSK	[K].AGGVFTPGAAFSK.[T]		0.000360009	1	2	-1.30535	-0.432999	1.22012	4.72837	0.872354	0.772453	0.932011	2.4371	3.99053	4.68112	1.37779	1.55343	0.610717	0.999952
+pH fractionation/SP	O75607	O75607	AGGVGGLR	[R].AGGVGGLR.[V]		0.00214104	1	7	-0.291666	1.19148	0.992913	1.17376	1.48314	0.170056	0.818997	-0.30862	1.55129	1.77467	0.235844	1.85991	0.146335	0.999952
+pH fractionation/SP	Q9BQA9	Q9BQA9-2; Q9BQA9	AGHDQVVVLLHDVR	[R].AGHDQVVVLLHDVR.[D]		0	1	9	-1.16752	-0.550492	0.549718	1.56665	0.617028	0.643427	0.895318		-1.63807					NA
+pH fractionation/SP	Q96KM6	Q96KM6	AGHDYHVR	[K].AGHDYHVR.[S]		0.00073701	1	4	-1.20171	-1.01735		0.734533	0.184357		NA	-1.31414	-2.55038	0.946898	3.89462	-1.23624	0.621494	0.999952
+pH fractionation/SP	Q9BWD1	Q9BWD1-2; Q9BWD1	AGHFDKEIVPVLVSTR	[K].AGHFDKEIVPVLVSTR.[K]		4.19381e-05	1	6	-1.45853		0.383411				NA	0.337858	0.857643	1.18487	0.547993	0.519785	0.528344	0.999952
+pH fractionation/SP	P48147	P48147	AGHGAGKPTAK	[K].AGHGAGKPTAK.[V]		4.19381e-05	1	4	-0.222865	-1.2282	1.40699	0.677907	-1.00533	0.431082	0.840255	-1.62888	-0.415878	0.880598	0.322472	1.213	0.171549	0.999952
+pH fractionation/SP	Q96P11-2	Q96P11; Q63ZY6-6; Q63ZY6; Q96P11-2; Q96P11-5; Q96P11-3; Q96P11-4; Q63ZY6-2; Q63ZY6-5	AGHLILQDR	[R].AGHLILQDR.[A]		0.000877399	1	7	-4.04495	-3.1168			0.928151		NA	2.10426	-0.562355		0.0357264	-2.66661		NA
+pH fractionation/SP	Q9Y2Z4	Q9Y2Z4	AGHNVIALVGGATAR	[R].AGHNVIALVGGATAR.[L]		4.19381e-05	1	8	-1.47588	-0.548959	0.783444	2.93035	0.926926	0.624616	0.890381	1.56094	2.47349	2.03253	0.722275	0.912559	0.504331	0.999952
+pH fractionation/SP	Q96EY7	Q96EY7	AGHQFGVTWR	[K].AGHQFGVTWR.[A]		0.000542627	1	6	4.14803	2.75826	0.250531	2.72559	-1.38977	0.428816	0.839816	2.094	1.25314	1.82278	0.521417	-0.840866	0.48521	0.999952
+pH fractionation/SP	P55263	P55263-4; P55263; P55263-3; P55263-2	AGHYAASIIIR	[R].AGHYAASIIIR.[R]		0.000420983	1	8	-0.838798	-2.29106	0.784515	0.467972	-1.45227	0.0511838	0.818997	-3.13361	-2.33127	0.622614	0.434083	0.802344	0.141069	0.999952
+pH fractionation/SP	Q6NVY1	Q6NVY1-2; Q6NVY1	AGIATHFVDSEK	[R].AGIATHFVDSEK.[L]		3.35083e-05	1	11	5.02189	4.19032	0.12554	2.56197	-0.831573	0.604412	0.885431	3.02973	2.34774	1.94726	0.681855	-0.681993	0.597604	0.999952
+pH fractionation/SP	P18583-5; P18583-3	P18583; P18583-4; P18583-6; P18583-5; P18583-10; P18583-9; P18583-2; P18583-3; P18583-7; KIAA1019_1056_I1	AGIEGPLLASDVGR	[R].AGIEGPLLASDVGR.[D]		0	2	42	-1.47598	-1.18681	1.21044	0.26355	0.289171	0.772174	0.931882	-1.47643	-1.28281	1.06809	0.0657323	0.193612	0.823694	0.999952
+pH fractionation/SP	O75694	O75694; O75694-2	AGIFQPHVR	[K].AGIFQPHVR.[H]		0.00192047	1	1	0.0469604	1.81356	0.348253	1.92621	1.7666	0.193047	0.818997	2.67522	3.75926	2.35368	0.561189	1.08404	0.481085	0.999952
+pH fractionation/SP	P09669	P09669	AGIFQSVK	[K].AGIFQSVK.[-]		0.000877399	1	2	-1.94805	-0.115555	0.440619		1.8325		NA	-0.728348	-0.737346	1.50669	0.0267206	-0.00899784	0.994111	0.999952
+pH fractionation/SP	Q7Z4Q2	Q7Z4Q2-2; Q7Z4Q2	AGIHSSNVGVR	[K].AGIHSSNVGVR.[V]		0.000877399	1	2	-2.43118	0.251125	0.798097	2.62302	2.68231	0.165418	0.818997	0.943857	3.72489	4.6809	1.15248	2.78103	0.37424	0.999952
+pH fractionation/SP	P13639	P13639	AGIIASAR	[K].AGIIASAR.[A]		0.000433877	1	33	0.651377	0.777826	1.4603	1.1929	0.126449	0.926216	0.980349	0.00500497	-0.0470787	1.44554	1.31887	-0.0520837	0.965439	0.999952
+pH fractionation/SP	P33991	P33991	AGIICQLNAR	[K].AGIICQLNAR.[T]	1xCarbamidomethyl [C5]	0.000169063	1	18	1.05688	1.20853	1.48858	1.35357	0.151649	0.902433	0.973496	2.20258	0.325664	0.472067	2.51746	-1.87691	0.273186	0.999952
+pH fractionation/SP	Q9P2E9	Q9P2E9-3; Q9P2E9	AGIIQDTWHK	[K].AGIIQDTWHK.[A]		4.19381e-05	1	8	1.87185	3.23325	0.644859	0.367297	1.36139	0.0785056	0.818997	0.702844	-0.384344	2.84077		-1.08719		NA
+pH fractionation/SP	P55786	P55786-2; P55786	AGIISTVEVLK	[R].AGIISTVEVLK.[V]		6.09156e-05	1	10	1.89059	0.592646	1.25415	1.21027	-1.29795	0.266615	0.818997	0.213408	-0.0502007	0.737183	1.58302	-0.263609	0.806645	0.999952
+pH fractionation/SP	Q99497	Q99497	AGIKVTVAGLAGKDPVQCSR	[R].AGIKVTVAGLAGKDPVQCSR.[D]	1xCarbamidomethyl [C18]	4.19381e-05	1	1	3.55945	3.31969	1.29806	0.943471	-0.239768	0.808565	0.943973	3.61869	3.84176	0.799072	0.148192	0.223069	0.659291	0.999952
+pH fractionation/SP	P33993	P33993; P33993-3	AGILTTLNAR	[K].AGILTTLNAR.[C]		4.19381e-05	1	16	-2.41373	2.71577	0.490408		5.1295		NA	0.215989	2.00882	3.36072	0.364392	1.79283	0.410282	0.999952
+pH fractionation/SP	Q9UPN3; Q9UPN3-5	Q9UPN3; Q9UPN3-5; Q9UPN3-3; Q9UPN3-4; Q9UPN3-2	AGINQNMDAVTEELQAK	[K].AGINQNMDAVTEELQAK.[T]		0	2	1	-2.90328	-3.26097		0.789042	-0.357689		NA	-2.25596	-2.32996		1.16369	-0.0740038		NA
+pH fractionation/SP	P24752	P24752-2; P24752	AGIPKEEVKEAYMGNVLQGGEGQAPTR	[K].AGIPKEEVKEAYMGNVLQGGEGQAPTR.[Q]		0	1	2	-2.87148		1.04728				NA	-0.797008	-3.29167	0.576775		-2.49467		NA
+pH fractionation/SP	P23526	P23526; P23526-2	AGIPVYAWK	[K].AGIPVYAWK.[G]		0.000177325	1	21	-0.00292773	0.91287	0.113027	0.513676	0.915797	0.0393248	0.818997	1.40161	0.28141	0.959736	1.3178	-1.1202	0.299794	0.999952
+pH fractionation/SP	P42768	P42768	AGISEAQLTDAETSK	[R].AGISEAQLTDAETSK.[L]		0	1	3	3.64578	1.43578	0.68329	2.0684	-2.21	0.163573	0.818997	0.466278	0.297848	2.77483	0.499659	-0.16843	0.940701	0.999952
+pH fractionation/SP	P78347	P78347-5; P78347-3; P78347-4; P78347; P78347-2	AGISFIIK	[K].AGISFIIK.[R]		0.00133186	1	4	1.9161	1.8621	0.272051	0.445586	-0.0539975	0.866532	0.962852	1.95408	2.67124	1.47713	0.345172	0.717154	0.458848	0.999952
+pH fractionation/SP	Q01826-2	Q01826; Q01826-2	AGISQAVFAR	[R].AGISQAVFAR.[V]		0.000177325	1	3	-0.975076	0.118554	1.41134	0.170322	1.09363	0.253545	0.818997	-0.178997	-0.666598	1.70171	0.540567	-0.487601	0.732546	0.999952
+pH fractionation/SP	P33992	P33992	AGITTTLNSR	[K].AGITTTLNSR.[C]		4.19381e-05	1	10		-0.783971		1.68749			NA		-2.64181					NA
+pH fractionation/SP	P49736	MCM2_620_E0; MCM2_620_I0; P49736	AGIVTSLQAR	[K].AGIVTSLQAR.[C]		4.19381e-05	1	63	-1.07345	-1.22328	0.367232	1.65808	-0.149823	0.885951	0.968438	-1.87332	-1.49485	1.54214	0.695018	0.378465	0.718099	0.999952
+pH fractionation/SP	P62906	P62906	AGKFPSLLTHNENMVAK	[K].AGKFPSLLTHNENMVAK.[V]		0	1	14	-0.983461	-1.41281	0.639881	0.616611	-0.429347	0.449758	0.846333	-0.00822967	-0.8158	0.625063	0.796605	-0.80757	0.239305	0.999952
+pH fractionation/SP	P35580-3; P35579	P35580-2; P35580; P35580-5; P35580-3; P35579; P35580-4; P35579-2	AGKLDPHLVLDQLR	[RK].AGKLDPHLVLDQLR.[C]		0	2	7	-1.25705	-1.82253	1.61505	1.67549	-0.565478	0.695477	0.908491	-2.61762		2.44632				NA
+pH fractionation/SP	P14618-2; P14618	P14618-2; P14618-3; P14618	AGKPVICATQMLESMIK	[R].AGKPVICATQMLESMIK.[K]	1xCarbamidomethyl [C7]; 2xOxidation [M11; M15]	4.19381e-05	2	2		-0.479835					NA		-1.39838		0.155653			NA
+pH fractionation/SP	P14618-2; P14618	P14618-2; P14618-3; P14618	AGKPVICATQMLESMIK	[R].AGKPVICATQMLESMIK.[K]	1xCarbamidomethyl [C7]; 1xOxidation [M]	0	2	46	-5.13478	-1.46059	0.0595542	3.00963	3.67418	0.226462	0.818997	1.83565	1.08634	0.885361		-0.74931		NA
+pH fractionation/SP	P14618-2; P14618	P14618-2; P14618-3; P14618	AGKPVICATQMLESMIK	[R].AGKPVICATQMLESMIK.[K]	1xCarbamidomethyl [C7]	0	2	37	-1.68411	-0.72952	1.36207	0.250818	0.954595	0.288458	0.819326	1.80704	-0.36147	0.491713	1.15378	-2.16851	0.0946475	0.999952
+pH fractionation/SP	O75369-8	O75369-9; O75369-5; O75369-2; FLNB_805_I2; O75369-8; O75369-7; FLNB_805_E2; O75369-4; O75369-6; O75369; O75369-3	AGLAPLEVR	[K].AGLAPLEVR.[V]		8.08306e-05	1	51	2.26483	1.32261	0.69652	1.16944	-0.942219	0.296712	0.819326	-1.81004	-0.314945	3.22926	2.20259	1.49509	0.543885	0.999952
+pH fractionation/SP	Q9UNS1	Q9UNS1; Q9UNS1-2	AGLASPEEEDAVGK	[K].AGLASPEEEDAVGK.[E]		0.000246334	1	1	-2.53474	-3.25228	1.41769		-0.717536		NA	-2.84762		0.0238788				NA
+pH fractionation/SP	Q96ME7	Q96ME7; Q96ME7-2; Q96ME7-3	AGLAYHLR	[K].AGLAYHLR.[S]		0.000177325	1	9	-2.79801	-1.48177		1.98586	1.31624		NA	0.0561111	-0.224199	0.688976	0.57299	-0.28031	0.651429	0.999952
+pH fractionation/SP	Q5JTZ9	Q5JTZ9	AGLDPDLETR	[K].AGLDPDLETR.[D]		0.000177325	1	7	4.38044	2.61722	0.72566	2.07613	-1.76322	0.244321	0.818997	2.86505	3.25588	1.73458	1.48999	0.390827	0.812835	0.999952
+pH fractionation/SP	Q9NTI5	Q9NTI5-2; Q9NTI5	AGLELLK	[R].AGLELLK.[V]		0.00228826	1	11	-0.0555062	0.982552	3.05613	1.55662	1.03806	0.627825	0.890834	0.0781181	-1.84159	2.92653	0.514854	-1.9197	0.457349	0.999952
+pH fractionation/SP	O60832	O60832	AGLESGAEPGDGDSDTTK	[K].AGLESGAEPGDGDSDTTK.[K]		0	1	3	-1.40912	-2.74738	0.198461	1.56029	-1.33826	0.207551	0.818997	-4.11989	-0.359374	1.82222		3.76052		NA
+pH fractionation/SP	Q86SK9	Q86SK9; Q86SK9-2	AGLESSEGGGGPERPGAR	[R].AGLESSEGGGGPERPGAR.[G]		4.19381e-05	1	1	-2.70245		0.716446				NA	-2.28086	-2.43724		1.97218	-0.156382		NA
+pH fractionation/SP	Q9UHN6	Q9UHN6-2; Q9UHN6	AGLFIDK	[K].AGLFIDK.[G]		0.00204599	1	1	2.19974	-0.483818	0.188177	0.478282	-2.68356	0.00262945	0.513374	3.07104	2.40169	1.67579	2.5015	-0.669351	0.719802	0.999952
+pH fractionation/SP	P49748-3	P49748; P49748-2; P49748-3	AGLGSGLSLSGLVHPELSR	[R].AGLGSGLSLSGLVHPELSR.[S]		0	1	9	-0.165912	-1.11048			-0.944571		NA	-2.39477	-1.54364	2.63759		0.851129		NA
+pH fractionation/SP	Q9Y4C1	Q9Y4C1	AGLGSITSVR	[K].AGLGSITSVR.[F]		0.000246334	1	1	-2.26213	-0.612671	0.119871	3.88779	1.64946	0.480093	0.853673	-0.128209	0.520478	1.61233	0.840117	0.648687	0.57003	0.999952
+pH fractionation/SP	Q9H6F5	Q9H6F5	AGLGSPERPPK	[R].AGLGSPERPPK.[T]		3.35083e-05	1	7	3.85862	2.45465	0.320747	1.56869	-1.40396	0.203444	0.818997	1.33437	1.34593	1.10033	0.46191	0.0115556	0.987422	0.999952
+pH fractionation/SP	Q96BH1	Q96BH1	AGLGTAMLYELIEK	[K].AGLGTAMLYELIEK.[G]		0.000849071	1	1	4.27244	5.06053	0.251154	1.38082	0.788086	0.385832	0.831756	5.68718	4.20197	1.25742	1.83028	-1.48521	0.311129	0.999952
+pH fractionation/SP	Q9P287-2	Q9P287-2	AGLIQSR	[K].AGLIQSR.[S]		0.0024516	1	2	3.54045	1.39272	0.154249	4.59459	-2.14773	0.463791	0.849985	1.12135	-0.334987	2.73003	0.771705	-1.45634	0.424175	0.999952
+pH fractionation/SP	O14745	O14745	AGLLAGDR	[K].AGLLAGDR.[L]		0.00900117	1	6	1.48839	0.839501	0.4213	0.291468	-0.648887	0.160435	0.818997	-0.31162	-1.90043	1.14391	1.09433	-1.58881	0.157142	0.999952
+pH fractionation/SP	Q8TD16-2	Q8TD16-2; Q8TD16	AGLLATLQDTQK	[K].AGLLATLQDTQK.[Q]		0.000177325	1	1	-1.95556		1.29416				NA							NA
+pH fractionation/SP	P23786	P23786	AGLLEPEVFHLNPAK	[R].AGLLEPEVFHLNPAK.[S]		3.35083e-05	1	6	-2.98438	1.08842	1.67999	3.7585	4.07281	0.180615	0.818997	1.85132	2.04987	4.53201	1.4576	0.198547	0.945881	0.999952
+pH fractionation/SP	P78527	P78527-2; P78527	AGLLHNILPSQSTDLHHSVGTELLSLVYK	[R].AGLLHNILPSQSTDLHHSVGTELLSLVYK.[G]		0	1	3		1.55176					NA	0.100625	1.68946	1.92564		1.58883		NA
+pH fractionation/SP	Q8IX12	Q8IX12-2; Q8IX12	AGLLQPPVR	[K].AGLLQPPVR.[I]		0.000903318	1	15	-4.62183	-2.01084	1.72224	0.300179	2.611	0.169059	0.818997	-0.935938	-4.12804		1.26012	-3.1921		NA
+pH fractionation/SP	Q00610	Q00610; Q00610-2	AGLLQR	[K].AGLLQR.[A]		0.00980225	1	5	-0.870619	-0.390819	2.87974	3.1078	0.4798	0.85406	0.95901	1.80795	1.77845	1.68018	2.74068	-0.0294979	0.988081	0.999952
+pH fractionation/SP	Q92979	Q92979	AGLLQVYIHTQK	[R].AGLLQVYIHTQK.[N]		4.19381e-05	1	8		-1.49309					NA	-2.32434	-1.3961	1.6586	0.3102	0.928243	0.518004	0.999952
+pH fractionation/SP	Q8TEX9-2	Q8TEX9; Q8TEX9-2	AGLLVLAVLSDGAGDHIR	[K].AGLLVLAVLSDGAGDHIR.[Q]		0	1	2	1.19519	1.73092	1.19077	1.42216	0.535734	0.643158	0.895232	-0.691184	-0.322408	0.927534	0.240091	0.368776	0.636094	0.999952
+pH fractionation/SP	Q14651	Q14651	AGLMLQEADK	[R].AGLMLQEADK.[L]		0.000152083	1	6	-2.075	-2.09866	0.571899	0.762053	-0.0236657	0.970307	0.991044	-3.80776	-2.90038	0.873973	1.21113	0.907385	0.393115	0.999952
+pH fractionation/SP	P05198	P05198	AGLNCSTENMPIK	[R].AGLNCSTENMPIK.[I]	1xCarbamidomethyl [C5]	3.35083e-05	1	18	2.65396	2.30125	0.582301	1.31998	-0.352706	0.69375	0.908188	3.50436	3.3742	0.821662	0.755255	-0.130154	0.849778	0.999952
+pH fractionation/SP	Q14738	Q14738-2; Q14738-3; Q14738	AGLNEMVEYITHSR	[R].AGLNEMVEYITHSR.[D]		3.35083e-05	1	2	2.60913	2.8176	0.847858	0.814233	0.208463	0.774051	0.93246	2.97223	2.79027	0.419785	1.4453	-0.181956	0.844367	0.999952
+pH fractionation/SP	Q9NVH1	Q9NVH1-3; Q9NVH1-2; Q9NVH1	AGLPGFYDPCVGEEK	[K].AGLPGFYDPCVGEEK.[N]	1xCarbamidomethyl [C10]	4.19381e-05	1	5	-4.30372	-0.45605	0.567438	3.86262	3.84767	0.161343	0.818997	0.154409	0.659819	3.43047	1.23185	0.50541	0.822007	0.999952
+pH fractionation/SP	O43463-2	O43463; O43463-2	AGLPIYECNSR	[R].AGLPIYECNSR.[C]	1xCarbamidomethyl [C8]	0.000711679	1	3	1.42724	2.0796	2.09329	1.46956	0.652354	0.681482	0.904835	0.0143161	0.0631838	4.30818	2.13943	0.0488678	0.986804	0.999952
+pH fractionation/SP	Q8IUE6; P04908; P0C0S5; P16104; P20671	Q16777; Q7L7L0; Q71UI9; Q71UI9-2; Q96QV6; Q8IUE6; P04908; P0C0S5; Q93077; Q99878; Q71UI9-5; Q96KK5; Q9BTM1-2; H2AFV_2248_I0; Q9BTM1; P16104; P20671; P0C0S8; Q6FI13	AGLQFPVGR	[R].AGLQFPVGR.[VI]		4.19381e-05	5	901	-2.38525	-0.824969	0.868338	0.918425	1.56028	0.0992922	0.818997	0.08755	0.101333	1.67093	1.21027	0.0137829	0.991322	0.999952
+pH fractionation/SP	Q8IUE6; P04908; P16104; P20671	Q16777; Q7L7L0; Q8IUE6; P04908; Q93077; Q99878; Q96KK5; Q9BTM1-2; Q9BTM1; P16104; P20671; P0C0S8; Q6FI13	AGLQFPVGRVHR	[R].AGLQFPVGRVHR.[L]		0.00246223	4	3	-1.62465	-0.604434	0.310919	0.449889	1.02022	0.0319385	0.792995	-0.543423	0.0615438	1.09891	1.42011	0.604967	0.623512	0.999952
+pH fractionation/SP	P13987	P13987	AGLQVYNK	[K].AGLQVYNK.[C]		0.000542627	1	8	1.69722	3.02278	0.487955	0.178553	1.32555	0.0115228	0.672033	3.50676	3.14108	0.891554	1.27396	-0.365684	0.704618	0.999952
+pH fractionation/SP	Q14690	Q14690	AGLSEEDDSLVDVYYR	[K].AGLSEEDDSLVDVYYR.[E]		3.35083e-05	1	1	-2.0181	-1.40246		2.69719	0.615646		NA	-1.1187	0.0304098	1.13233	0.296619	1.14911	0.27306	0.999952
+pH fractionation/SP	Q14692	Q14692	AGLSPANCQSDR	[K].AGLSPANCQSDR.[V]	1xCarbamidomethyl [C8]	4.19381e-05	1	3		0.215121					NA	-1.12141	1.13175	3.39696	0.575585	2.25316	0.441995	0.999952
+pH fractionation/SP	Q92900	Q92900-2; Q92900	AGLSQSLFER	[K].AGLSQSLFER.[L]		4.19381e-05	1	19	2.141	1.34058	1.63293	0.738097	-0.800414	0.482323	0.854582	1.5816	0.507309	0.766246	0.0996756	-1.07429	0.073709	0.999952
+pH fractionation/SP	Q969N2	Q969N2-3; Q969N2-4; Q969N2-6; Q969N2; Q969N2-5	AGLSVLLK	[K].AGLSVLLK.[A]		0.000542627	1	7	2.38451	1.05466	0.648009	0.881451	-1.32985	0.103021	0.818997	1.01016	0.419696	0.531136	0.604015	-0.590467	0.272446	0.999952
+pH fractionation/SP	Q8TDD1-2	Q8TDD1; Q8TDD1-2	AGLTEPVLIR	[R].AGLTEPVLIR.[L]		4.19381e-05	1	10	1.35508	0.186421	0.2503	1.12154	-1.16866	0.152952	0.818997	0.195814	-0.562282	1.4541	0.78402	-0.758095	0.488927	0.999952
+pH fractionation/SP	Q14558-2; O60256	O60256-3; O60256-4; Q14558-2; O60256-2; Q14558; O60256	AGLTHLITMDLHQK	[K].AGLTHLITMDLHQK.[E]		0	2	30	0.543833	0.203871	0.260847	1.89495	-0.339962	0.773572	0.932326	0.18957	0.459072	0.808482	1.98214	0.269502	0.872028	0.999952
+pH fractionation/SP	O75947	O75947; O75947-2	AGLVDDFEK	[K].AGLVDDFEK.[K]		0.000420983	1	1	-2.89951	-3.83898	1.12283		-0.939467		NA	-2.34233	-3.46105		0.606959	-1.11873		NA
+pH fractionation/SP	Q13425	Q13425-2; Q13425	AGLVELLLR	[K].AGLVELLLR.[E]		0.000553704	1	2	-4.44121	-0.165221			4.27598		NA	-0.0592984	-1.03691			-0.977611		NA
+pH fractionation/SP	Q15149	Q15149-4; Q15149; Q15149-6; Q15149-9; Q15149-3; Q15149-8; Q15149-5; Q15149-7; Q15149-2	AGLVGPEFHEK	[R].AGLVGPEFHEK.[L]		4.19381e-05	1	5	-0.472815	2.22022	0.322892	0.94358	2.69303	0.0165016	0.709544	1.52756	0.910219	0.583783	0.736906	-0.617339	0.318894	0.999952
+pH fractionation/SP	Q96AE4; Q96AE4-2; Q92945	Q96AE4; Q96AE4-2; Q92945	AGLVIGK	[K].AGLVIGK.[G]		0.00295288	3	41	-0.712209	-1.79809	0.541685	2.31891	-1.08588	0.473825	0.852649	-2.50064	-1.97934	1.46708	1.1816	0.521302	0.686594	0.999952
+pH fractionation/SP	Q96L91	Q96L91-3; Q96L91-5; Q96L91; Q96L91-2; Q96L91-4	AGLWSQR	[K].AGLWSQR.[R]		0.0038493	1	1	-0.670293	0.270713	0.128162	1.09319	0.941006	0.350177	0.824979		-1.92249		0.710238			NA
+pH fractionation/SP	P49327	P49327	AGLYGLPR	[K].AGLYGLPR.[R]		0.000542627	1	14	-2.02246	-0.931933	1.50295	3.39273	1.09053	0.637528	0.893958	1.3582	3.13576	3.70702	0.341588	1.77757	0.454698	0.999952
+pH fractionation/SP	P56192	P56192	AGMFVSK	[R].AGMFVSK.[F]		0.00437681	1	7	0.068433	0.806058	0.527335	1.56111	0.737625	0.477752	0.853291	0.417201	1.80122	2.28998	0.087922	1.38402	0.476949	0.999952
+pH fractionation/SP	Q9HC36	Q9HC36	AGMGAHFR	[R].AGMGAHFR.[M]		0.00397319	1	1	-0.636798	-0.628815		1.77866	0.00798315		NA		-0.938475					NA
+pH fractionation/SP	P34896	P34896-3; P34896-4; P34896; P34896-2	AGMIFYR	[R].AGMIFYR.[K]		0.00170974	1	6	-1.4204	-2.22595	0.585866	1.00501	-0.805543	0.29657	0.819326	-2.51069	-3.46676	0.532535	0.839517	-0.95607	0.20611	0.999952
+pH fractionation/SP	O60306	O60306	AGMQPGLTMVVGPPGTGK	[R].AGMQPGLTMVVGPPGTGK.[T]		0	1	3	-0.570871	-1.32749	0.190707	2.12003	-0.756617	0.571421	0.876043	-0.472742	1.13323	0.610976	1.99204	1.60597	0.252793	0.999952
+pH fractionation/SP	Q9Y2Q3	Q9Y2Q3-4; Q9Y2Q3-2; Q9Y2Q3-3; Q9Y2Q3	AGMSAEQAQGLLEK	[K].AGMSAEQAQGLLEK.[I]		0	1	11	-0.0143189	1.13274	1.04154	1.28519	1.14706	0.295998	0.819326	1.20475	1.83688	1.12677	0.548528	0.632126	0.528009	0.999952
+pH fractionation/SP	P40227	Q92526-3; P40227; P40227-2; Q92526-2; Q92526	AGMSSLK	[R].AGMSSLK.[-G]		0.00257628	1	9	-1.10295	-1.32884	0.140387		-0.225885		NA	-5.73377	-4.7058	0.75852		1.02797		NA
+pH fractionation/SP	Q9UQ35	Q9UQ35; Q9UQ35-2	AGMSSNQSISSPVLDAVPR	[K].AGMSSNQSISSPVLDAVPR.[T]		0	1	4	-1.20877	-2.50173	0.48269	4.72803	-1.29296	0.662042	0.900181	-0.0177836	-3.22383		2.12968	-3.20605		NA
+pH fractionation/SP	P57740	P57740-3; P57740-2; P57740	AGMTEEAQR	[R].AGMTEEAQR.[L]		0.000387362	1	5	-0.638641	-2.07521	0.0362215	1.54985	-1.43657	0.183761	0.818997	-1.42584	-1.50991	0.370989	1.16163	-0.0840736	0.930512	0.999952
+pH fractionation/SP	P39023	P39023	AGMTHIVR	[K].AGMTHIVR.[E]		0.00030511	1	15	-0.33355	-0.352967	0.803636	1.49349	-0.0194177	0.98557	0.995592	0.0449137	0.547632	1.048	0.307172	0.502718	0.46992	0.999952
+pH fractionation/SP	P39023	P39023	AGMTHIVR	[K].AGMTHIVR.[E]	1xOxidation [M3]	0.000275366	1	31	5.13367	5.53966	1.10064	1.60074	0.405989	0.735678	0.920573	5.7362	5.97529	1.92806	0.075696	0.239092	0.840561	0.999952
+pH fractionation/SP	Q14573	Q14573	AGNAHDENVLSYYR	[R].AGNAHDENVLSYYR.[Y]		0.000592394	1	1	-1.2883	-0.131468			1.15683		NA	-1.52825	-0.30062	2.39811	0.700151	1.22763	0.549362	0.999952
+pH fractionation/SP	P0C1Z6	P0C1Z6; P0C1Z6-2	AGNALTPELAPVQIK	[R].AGNALTPELAPVQIK.[V]		0.000114852	1	3	-1.98694	0.277856	2.9628	0.291408	2.26479	0.381563	0.831052	1.96564	-2.60803		0.0547635	-4.57367		NA
+pH fractionation/SP	P23381	P23381	AGNASKDEIDSAVK	[K].AGNASKDEIDSAVK.[M]		4.19381e-05	1	1	0.392014	0.38197	0.888908		-0.0100443		NA	0.771502	-1.90133	0.803802		-2.67283		NA
+pH fractionation/SP	P11387	P11387	AGNEKEEGETADTVGCCSLR	[R].AGNEKEEGETADTVGCCSLR.[V]	2xCarbamidomethyl [C16; C17]	0	1	5	-3.18961	-2.33706	1.28757	0.944809	0.852549	0.407491	0.835568	-2.21248	-1.83653	0.320096	0.678593	0.375951	0.446234	0.999952
+pH fractionation/SP	O15530	O15530; Q6A1A2; O15530-5; O15530-2; O15530-3; O15530-4	AGNEYLIFQK	[R].AGNEYLIFQK.[I]		0.00140139	1	1	-4.0934	-2.34779	1.2387	3.44451	1.74561	0.455231	0.84745	-1.45194	0.0137079	1.40354	1.37768	1.46565	0.333166	0.999952
+pH fractionation/SP	P18124	P18124	AGNFYVPAEPK	[K].AGNFYVPAEPK.[L]		4.19381e-05	1	48	2.39055	1.91215	0.71878	2.11797	-0.4784	0.729812	0.918539	0.878292	0.976367	1.31287	0.500079	0.0980757	0.909589	0.999952
+pH fractionation/SP	Q15393	Q15393; Q15393-3	AGNGQWASVIR	[K].AGNGQWASVIR.[V]		3.35083e-05	1	13	1.86036	1.90944	0.145828	1.02444	0.0490718	0.938482	0.982736	0.669873	0.0410177	2.37097	0.642668	-0.628855	0.670475	0.999952
+pH fractionation/SP	Q9H2G2	Q9H2G2-2; Q9H2G2	AGNILFTLDGDIK	[K].AGNILFTLDGDIK.[L]		4.19381e-05	1	4	1.63453	-0.604189	0.461354	1.54461	-2.23871	0.0851807	0.818997	0.526683	-1.04571		0.0325166	-1.5724		NA
+pH fractionation/SP	Q13043; Q13188-2	Q13043; Q13188; Q13043-2; Q13188-2	AGNILLNTEGHAK	[K].AGNILLNTEGHAK.[L]		3.35083e-05	2	13	-1.33785	0.884247			2.2221		NA	0.401862	0.339852	1.36997	0.996198	-0.0620095	0.952485	0.999952
+pH fractionation/SP	Q7L7X3; Q9H2K8	Q7L7X3; Q9H2K8; Q7L7X3-3	AGNILLTEPGQVK	[K].AGNILLTEPGQVK.[L]		4.19381e-05	2	5	-2.91452	-3.03536	2.40726	0.729716	-0.120837	0.937686	0.982651	-3.45841	-3.81224	1.81296	1.28183	-0.353832	0.796208	0.999952
+pH fractionation/SP	P35268	P35268	AGNLGGGVVTIER	[K].AGNLGGGVVTIER.[S]		0	1	44	-2.42254	-2.61115	2.34237	1.82954	-0.188604	0.924804	0.979826	-1.83506	-1.93838	1.17055	1.46215	-0.103328	0.934863	0.999952
+pH fractionation/SP	P21333	P21333; P21333-2	AGNNMLLVGVHGPR	[K].AGNNMLLVGVHGPR.[T]	1xOxidation [M5]	0	1	17	6.70593	7.43993	0.759584	1.36168	0.734002	0.460628	0.848919	7.70916	7.6952	0.312034	0.62328	-0.0139533	0.974002	0.999952
+pH fractionation/SP	P21333	P21333; P21333-2	AGNNMLLVGVHGPR	[K].AGNNMLLVGVHGPR.[T]		0	1	40	3.48946	2.74505	0.240625	1.11341	-0.744403	0.320942	0.820259	2.35938	1.56557	0.771939	0.522375	-0.793806	0.21421	0.999952
+pH fractionation/SP	P55809	P55809	AGNVIFR	[R].AGNVIFR.[K]		0.00200955	1	17	-1.95834	-1.0366	1.3591	2.5774	0.921747	0.61289	0.887832	0.428453	-0.552936	1.48765	2.12426	-0.981388	0.547964	0.999952
+pH fractionation/SP	P55809	P55809	AGNVIFRK	[R].AGNVIFRK.[S]		0.0049861	1	1		-3.36718					NA	-4.36059	-0.809456	0.449248	0.86362	3.55113	0.035581	0.999952
+pH fractionation/SP	P18887	P18887	AGPEELGK	[R].AGPEELGK.[I]		0.00223086	1	2	-4.42427	-0.978878	1.26252	5.43187	3.44539	0.474399	0.852649	-0.228133	1.33145	3.29522	1.03631	1.55958	0.579258	0.999952
+pH fractionation/SP	Q99575	Q99575	AGPEGTSQEIPK	[K].AGPEGTSQEIPK.[Y]		0.000420983	1	3	-1.16487	-2.27296	0.133722	0.365545	-1.10809	0.00786803	0.626992	-2.28224	-2.42045	1.02813	1.59317	-0.138208	0.905626	0.999952
+pH fractionation/SP	Q9NUL3	Q9NUL3-7; Q9NUL3-3; Q9NUL3-6; Q9NUL3-4; Q9NUL3-2; Q9NUL3; Q9NUL3-8	AGPEYGQGMNPISR	[K].AGPEYGQGMNPISR.[L]		0	1	10	-1.17302	0.560658	0.348994	2.70053	1.73368	0.332014	0.822884	1.93881	2.88156	3.15683	0.580157	0.94275	0.637714	0.999952
+pH fractionation/SP	Q9P289	Q9P289-2; Q9P289; Q9P289-3	AGPFDEFQIATMLK	[R].AGPFDEFQIATMLK.[E]		0	1	4	-2.2225	-1.63276	0.975963	0.2145	0.589741	0.364466	0.829318	-1.36908	-1.92076	1.02294	0.377852	-0.551687	0.534284	0.999952
+pH fractionation/SP	Q86YV0	Q86YV0-2; Q86YV0	AGPGQLFWAER	[R].AGPGQLFWAER.[F]		4.19381e-05	1	6	2.25179	1.0341	0.390385	1.54899	-1.21768	0.257215	0.818997	0.536405	0.3274	1.26283	0.392112	-0.209006	0.797816	0.999952
+pH fractionation/SP	Q9BW19	Q9BW19	AGPGSEELTVTNAR	[R].AGPGSEELTVTNAR.[Y]		3.35083e-05	1	7	1.35285	-0.457792	1.01871	1.74439	-1.81064	0.1955	0.818997	-1.14497	-1.5771	1.28042	0.963941	-0.432126	0.664803	0.999952
+pH fractionation/SP	Q14684	Q14684; Q14684-2	AGPGSLELCGLPSQK	[K].AGPGSLELCGLPSQK.[T]	1xCarbamidomethyl [C9]	0	1	16	-0.982294	0.794377	0.926162	3.51665	1.77667	0.435228	0.84138	-0.512831	1.28226	0.75312	1.12492	1.79509	0.115322	0.999952
+pH fractionation/SP	O75369-8	O75369-9; O75369-2; O75369-8; O75369-7; O75369-6; O75369; O75369-3	AGPGTLSVTIEGPSK	[R].AGPGTLSVTIEGPSK.[V]		0	1	27	-0.760499	0.163338	0.041834	0.653399	0.923838	0.184122	0.818997	-0.0160095	-0.0489778	0.899596	0.0972907	-0.0329684	0.963981	0.999952
+pH fractionation/SP	Q9UNI6	Q9UNI6	AGPGVEDLWR	[K].AGPGVEDLWR.[L]		0.00030511	1	2	0.709076	0.993844	0.213334	0.240399	0.284768	0.199671	0.818997	1.39613	-0.646756			-2.04289		NA
+pH fractionation/SP	Q6NYC8	Q6NYC8-4; Q6NYC8-3; Q6NYC8	AGPGVGAPR	[K].AGPGVGAPR.[R]		0.000420983	1	3	-0.526616	-1.21179	0.186707	0.466217	-0.685174	0.0774045	0.818997	-2.13989	-3.04293	1.91875	1.9337	-0.903038	0.596596	0.999952
+pH fractionation/SP	O43390; O43390-2; O60506	O43390-4; O43390-3; O43390; O60506-4; O60506-5; O43390-2; O60506; O60506-2; O60506-3	AGPIWDLR	[K].AGPIWDLR.[L]		0.000177325	3	39	-1.2519	-1.44464	1.21737	0.915285	-0.192745	0.86319	0.961998	-1.52692	-2.0115	1.33762	0.428227	-0.484582	0.667835	0.999952
+pH fractionation/SP	P78559-2	P78559-2; P78559	AGPMALSSK	[K].AGPMALSSK.[G]		0.000660158	1	3	-1.6185	-1.65566	0.255469	0.906528	-0.0371641	0.948791	0.985337	-1.95984	-1.85183	0.853379	0.690266	0.108003	0.872943	0.999952
+pH fractionation/SP	Q9H0A0	Q9H0A0-2; Q9H0A0	AGPNASIISLK	[K].AGPNASIISLK.[S]		4.19381e-05	1	25	-1.12507	-0.403458	0.345303	0.924506	0.721614	0.409755	0.836476	-0.893956	-1.63598		0.871911	-0.742029		NA
+pH fractionation/SP	Q16630-2	CPSF6_1523_I2; Q16630-2; CPSF6_1523_E2; Q16630	AGPPGGSSR	[K].AGPPGGSSR.[A]		0.00336824	1	2	-1.97731		4.05647				NA	-2.49993		2.5573				NA
+pH fractionation/SP	O14497	ARID1A variant protein_2617_I1; O14497; O14497-3; O14497-2	AGPPVPASHIAPAPVQPPMIR	[K].AGPPVPASHIAPAPVQPPMIR.[R]	1xOxidation [M19]	4.19381e-05	1	2		-1.66881					NA	-3.01223	-0.932044	1.90201	0.385221	2.08019	0.26879	0.999952
+pH fractionation/SP	O14497	ARID1A variant protein_2617_I1; O14497; O14497-3; O14497-2	AGPPVPASHIAPAPVQPPMIR	[K].AGPPVPASHIAPAPVQPPMIR.[R]		0	1	14	2.80262	2.41605	0.223252	0.0467042	-0.386574	0.10517	0.818997	0.174587	0.956412	3.94079	2.75544	0.781825	0.792208	0.999952
+pH fractionation/SP	Q9Y6J0	Q9Y6J0; Q9Y6J0-2	AGPTEPMDTSEATVCHSDLER	[R].AGPTEPMDTSEATVCHSDLER.[T]	1xCarbamidomethyl [C15]	0	1	2	-4.58683	-0.525052		5.67504	4.06178		NA	3.58593	4.02682	0.717444	0.772137	0.440886	0.567559	0.999952
+pH fractionation/SP	Q13428-3; Q13428-7	Q13428-5; Q13428-3; Q13428-4; Q13428-7; Q13428-6; Q13428-8; Q13428-2; Q13428	AGPVAVQVK	[K].AGPVAVQVK.[A]		0.000169063	2	12	-1.08229	-1.77593	0.403719	0.0678503	-0.693644	0.106053	0.818997	-4.90533						NA
+pH fractionation/SP	P49247	P49247	AGPVVTDNGNFILDWK	[K].AGPVVTDNGNFILDWK.[F]		0	1	4	-1.12484	-4.1612	0.92563		-3.03637		NA	-2.48344	-4.79531			-2.31187		NA
+pH fractionation/SP	P07199	P07199	AGQAGLPCDYTANSK	[R].AGQAGLPCDYTANSK.[G]	1xCarbamidomethyl [C8]	3.35083e-05	1	3		-2.42832		0.850076			NA	-1.88654	-0.461067	0.64026	1.1364	1.42548	0.262244	0.999952
+pH fractionation/SP	P57772	EEFSEC_6675_E1; P57772; P57772-2; EEFSEC_6675_I1	AGQATEGHCPR	[K].AGQATEGHCPR.[Q]	1xCarbamidomethyl [C9]	0	1	4	-0.920034	-0.648453	0.550056		0.27158		NA	-1.03814	-1.34752	1.60663	0.295512	-0.309383	0.813918	0.999952
+pH fractionation/SP	P52209	P52209-2; P52209	AGQAVDDFIEK	[K].AGQAVDDFIEK.[L]		4.19381e-05	1	21	2.98552	1.68728	0.432265		-1.29824		NA	-2.91887	-2.70527	1.4808		0.213601		NA
+pH fractionation/SP	Q99439	Q99439	AGQCVIGLQMGTNK	[K].AGQCVIGLQMGTNK.[C]	1xCarbamidomethyl [C4]	0	1	7	0.637832	1.3349	0.203335	0.853742	0.697066	0.240919	0.818997	1.04906	0.805946	0.762691	1.33032	-0.243111	0.797225	0.999952
+pH fractionation/SP	Q99549	Q99549-2; Q99549	AGQDMGLEHGFEKPLDSAMSAEEDTDVR	[R].AGQDMGLEHGFEKPLDSAMSAEEDTDVR.[G]		0	1	5	-2.72488	-1.1922	0.571998	0.0670233	1.53269	0.0372153	0.812531	-3.31355	-4.23832	1.05036	2.54857	-0.924767	0.68194	0.999952
+pH fractionation/SP	Q5JTZ9	Q5JTZ9	AGQEDVLFPVAR	[R].AGQEDVLFPVAR.[A]		6.09156e-05	1	6	2.75998	2.69026	0.367402	1.03187	-0.0697147	0.917528	0.977486	0.790396	0.534821	2.81662	1.63474	-0.255576	0.898444	0.999952
+pH fractionation/SP	Q16222; Q3KQV9	Q16222; Q16222-3; Q16222-2; Q3KQV9	AGQEHLLR	[KR].AGQEHLLR.[F]		0.000224101	2	6	4.7906	1.78562	0.507531	2.98364	-3.00498	0.1606	0.818997	2.55056	-0.445819	2.12438	4.55332	-2.99638	0.360002	0.999952
+pH fractionation/SP	Q9NPI6	Q9NPI6-2; Q9NPI6	AGQEMSLAALK	[R].AGQEMSLAALK.[Q]		0.000177325	1	2	-1.60483	-1.21398	1.35186	0.00277152	0.39085	0.72398	0.91723	-0.740511	-0.357021	1.24312	1.91249	0.38349	0.785376	0.999952
+pH fractionation/SP	Q9UJX3	Q9UJX3-2; Q9UJX3	AGQERPSVTSYK	[K].AGQERPSVTSYK.[E]		0.000420983	1	1		-1.0231		1.04479			NA	-0.913572	-0.570116	1.46629	1.18258	0.343456	0.802576	0.999952
+pH fractionation/SP	Q9HBM0	Q9HBM0; Q9HBM0-2	AGQHPSQHLIGLR	[K].AGQHPSQHLIGLR.[K]		0.000224101	1	1	-1.92198	-0.647346	0.17659	0.965525	1.27464	0.177253	0.818997	-0.242867	0.148062	0.826609	0.980719	0.390929	0.625488	0.999952
+pH fractionation/SP	Q6PGP7	Q6PGP7	AGQHSQAVADLQAALR	[K].AGQHSQAVADLQAALR.[A]		4.19381e-05	1	1	-4.36485	-1.34037		0.387468	3.02448		NA	-1.16297	-0.760143	2.71771	0.654374	0.402823	0.85737	0.999952
+pH fractionation/SP	P51532	P51532; P51532-5; P51532-2; P51532-4; P51532-3	AGQLEAWLEMNPGYEVAPR	[K].AGQLEAWLEMNPGYEVAPR.[S]		0	1	2	-5.20327	-1.25887	0.893643	2.54884	3.9444	0.174903	0.818997	-3.48865						NA
+pH fractionation/SP	Q03252	Q03252	AGQMVTVWAAGAGVAHSPPSTLVWK	[R].AGQMVTVWAAGAGVAHSPPSTLVWK.[G]		0	1	5	-2.31542	-0.382047	1.7106	1.6904	1.93338	0.300594	0.819326	0.433346	0.747757	0.0355888	0.0630375	0.314411	0.0254959	0.999952
+pH fractionation/SP	P25325-2	P25325-2; P25325	AGQPLQLLDASWYLPK	[R].AGQPLQLLDASWYLPK.[L]		0	1	2	2.49964	3.1532	0.87744	0.817899	0.653564	0.398751	0.834431	1.93987	3.2501	1.60219	1.59666	1.31023	0.372489	0.999952
+pH fractionation/SP	Q8TDZ2-4	Q8TDZ2; Q8TDZ2-4; Q8TDZ2-2	AGQPVYQQGR	[R].AGQPVYQQGR.[A]		0.000177325	1	1	2.71995	2.49207	0.481223		-0.227879		NA	-1.76338	-1.6845	5.98295		0.0788863		NA
+pH fractionation/SP	P22033	P22033	AGQQGLSVAFDLATHR	[K].AGQQGLSVAFDLATHR.[G]		3.35083e-05	1	2	1.06592	-0.721407	0.321709	1.04236	-1.78733	0.0585145	0.818997	-0.944165	-2.08942		0.815559	-1.14526		NA
+pH fractionation/SP	P21333	P21333; P21333-2	AGQSAAGAAPGGGVDTR	[R].AGQSAAGAAPGGGVDTR.[D]		0	1	7	2.61738	0.994504	0.436132	0.786337	-1.62288	0.0540883	0.818997	-1.65625	-2.33443	2.20583	1.52472	-0.678186	0.735562	0.999952
+pH fractionation/SP	P09543	P09543-2; P09543	AGQVFLEELGNHK	[K].AGQVFLEELGNHK.[A]		0	1	18	0.39071	0.449168	0.335163	1.28502	0.0584578	0.942887	0.983821	0.78571	0.570871	0.137129	0.353885	-0.214839	0.382369	0.999952
+pH fractionation/SP	Q12788	Q12788	AGQVMCVAQGSGHTHSVGTVCCSR	[K].AGQVMCVAQGSGHTHSVGTVCCSR.[L]	3xCarbamidomethyl [C6; C21; C22]	0	1	1		1.26337					NA	-0.578959	-0.644559	1.02994	1.16753	-0.0656004	0.953025	0.999952
+pH fractionation/SP	Q9H6U8-3	Q9H6U8-3; Q9H6U8	AGQVWAPEGSTAFK	[K].AGQVWAPEGSTAFK.[C]		4.19381e-05	1	3	0.78366	0.354241	0.444746	1.1627	-0.429419	0.582368	0.879369	0.701587	-0.0290211	0.468416	1.28299	-0.730608	0.406623	0.999952
+pH fractionation/SP	O75643	O75643	AGRPQYDTK	[R].AGRPQYDTK.[G]		0.000177325	1	9	1.00284	-0.301327	0.777538	0.169253	-1.30416	0.112608	0.818997	-0.4525	-0.768342	1.56031	0.233117	-0.315842	0.804616	0.999952
+pH fractionation/SP	Q9Y696	Q9Y696	AGSDGESIGNCPFSQR	[K].AGSDGESIGNCPFSQR.[L]	1xCarbamidomethyl [C11]	3.35083e-05	1	2	-0.568817	-1.00624	1.01329	2.94369	-0.437425	0.86086	0.961498	-2.48179	-1.04693		1.90171	1.43485		NA
+pH fractionation/SP	Q8WZA9	Q8WZA9	AGSEGLQQVVGMK	[K].AGSEGLQQVVGMK.[K]		0	1	3	0.127684	1.01933	0.555944	1.28218	0.891645	0.331119	0.822862	-1.71983	-1.98459	2.84566		-0.26476		NA
+pH fractionation/SP	Q53F19	Q53F19	AGSFITGIDVTSK	[K].AGSFITGIDVTSK.[E]		0	1	8	-2.48048	-0.599635	3.32314	2.49173	1.88085	0.587493	0.880727	-1.82712	-3.01267	2.64666	1.32248	-1.18555	0.525859	0.999952
+pH fractionation/SP	Q9H4L5	Q9BZF3-2; Q9BZF3-5; Q9BZF3-3; Q9BZF3; Q9H4L5; Q9H4L5-2; Q9H4L5-3; Q9H4L5-4; Q9BZF3-4	AGSKPFNPVLGETYECIR	[R].AGSKPFNPVLGETYECIR.[E]	1xCarbamidomethyl [C16]	0.000209795	1	1	-2.04517	-0.865227	0.159623	1.04764	1.17995	0.126027	0.818997	-2.04617	-0.872239		1.09948	1.17393		NA
+pH fractionation/SP	P46100	P46100; P46100-3; P46100-4; P46100-5; P46100-2	AGSLGINLVAANR	[K].AGSLGINLVAANR.[V]		3.35083e-05	1	3	-1.84336	-0.823087	0.591186		1.02027		NA	-2.35771		0.853782				NA
+pH fractionation/SP	Q08AD1	Q08AD1-2; Q08AD1; Q08AD1-3	AGSLILK	[R].AGSLILK.[S]		0.00968048	1	2	-0.898802		0.337946				NA	-2.34904		1.29131				NA
+pH fractionation/SP	O75369-8	O75369-9; O75369-2; O75369-8; O75369-7; O75369-6; O75369; O75369-3	AGSNMLLIGVHGPTTPCEEVSMK	[K].AGSNMLLIGVHGPTTPCEEVSMK.[H]	1xCarbamidomethyl [C17]	0	1	11	0.616134	-0.884654	1.15031	0.156953	-1.50079	0.0887172	0.818997	0.0927739	-0.225707	2.41029	0.390928	-0.318481	0.832345	0.999952
+pH fractionation/SP	O60287	O60287	AGSPFHPAMEALSLSSLSEK	[R].AGSPFHPAMEALSLSSLSEK.[D]		0	1	5	-2.15176	0.642547	0.895295	1.33419	2.79431	0.133095	0.818997	1.87221	1.90838	0.0583031	1.37947	0.0361716	0.974158	0.999952
+pH fractionation/SP	Q8TCJ2	Q8TCJ2	AGSPTLLNCLMYK	[K].AGSPTLLNCLMYK.[M]	1xCarbamidomethyl [C9]	3.35083e-05	1	11	0.742771	2.53903	0.396049	0.119111	1.79625	0.0254963	0.766657	3.06652	1.24332		0.446141	-1.8232		NA
+pH fractionation/SP	Q02241	Q02241-2; Q02241-3; Q02241	AGSQLGPGYQHHAQPK	[R].AGSQLGPGYQHHAQPK.[R]		3.35083e-05	1	2		-0.868271		2.83612			NA	1.61922						NA
+pH fractionation/SP	Q86YV0	Q86YV0	AGSSEFDSEHNLTSNEGHSLK	[R].AGSSEFDSEHNLTSNEGHSLK.[N]		0	1	4	-2.37389	-0.603886		3.9615	1.77001		NA	-0.0400723	0.592959	1.18532	0.788045	0.633031	0.562911	0.999952
+pH fractionation/SP	P46379-3	P46379-3; P46379-5; P46379-4; P46379-2; P46379	AGSSESIAAFIQR	[R].AGSSESIAAFIQR.[L]		3.35083e-05	1	9	0.20744	1.17106	1.45571	1.87258	0.963622	0.520431	0.862145	2.60434	2.09431	1.29285	1.94769	-0.510029	0.724712	0.999952
+pH fractionation/SP	Q7Z6Z7	Q7Z6Z7-2; Q7Z6Z7; Q7Z6Z7-3	AGSSTPGDAPPAVAEVQGR	[R].AGSSTPGDAPPAVAEVQGR.[S]		0	1	6	3.78976	0.869497	0.365418	1.99492	-2.92026	0.0671985	0.818997	0.563187	0.898177	2.56828	0.329883	0.33499	0.872744	0.999952
+pH fractionation/SP	P49790	P49790-3; P49790-2; P49790	AGSSWQCDTCLLQNK	[K].AGSSWQCDTCLLQNK.[V]	2xCarbamidomethyl [C7; C10]	0	1	6	0.368707	0.677339	0.180369	1.25052	0.308632	0.69398	0.908228	1.63734	2.29969	2.01031	0.510754	0.662345	0.609654	0.999952
+pH fractionation/SP	Q9NW13	Q9NW13; Q9NW13-2	AGSTSWTGFQTK	[K].AGSTSWTGFQTK.[A]		4.19381e-05	1	7	-2.34222	-0.45852	1.12037	0.515118	1.8837	0.0754058	0.818997	2.02174	1.17112	1.07574	0.876404	-0.850627	0.397913	0.999952
+pH fractionation/SP	O94906	O94906-2; O94906	AGSVATCQAVMR	[R].AGSVATCQAVMR.[A]	1xCarbamidomethyl [C7]	4.19381e-05	1	2		-0.404516					NA	-2.6777	-1.47374		1.01864	1.20396		NA
+pH fractionation/SP	O95466-2	O95466; O95466-2; O95466-3	AGSVSLDSVLADVR	[K].AGSVSLDSVLADVR.[S]		3.35083e-05	1	10	-0.807318	-0.678798	0.645579	1.48893	0.128519	0.897527	0.971637	-2.2157	-1.50148	1.48945	0.950303	0.714221	0.522399	0.999952
+pH fractionation/SP	Q7Z3J2	Q7Z3J2; Q7Z3J2-2	AGTATLAMSEK	[K].AGTATLAMSEK.[V]		0.000192563	1	2	1.27159	-0.358777	0.542747	2.40631	-1.63036	0.30807	0.819326	-0.516767	-1.0707	1.67401	0.384782	-0.55393	0.693074	0.999952
+pH fractionation/SP	Q9BQG0-2	Q9BQG0; Q9BQG0-2	AGTDPSHMPTGPQAASCLDLNLVTR	[K].AGTDPSHMPTGPQAASCLDLNLVTR.[V]	1xCarbamidomethyl [C17]	0	1	6	-6.36907	-1.50763			4.86144		NA	-0.372025	-0.410904	1.5331	0.31616	-0.0388792	0.975257	0.999952
+pH fractionation/SP	O95456	O95456; O95456-2	AGTEDEEEEEEGR	[R].AGTEDEEEEEEGR.[R]		3.35083e-05	1	3	-0.793623	-1.34751	0.35921		-0.553889		NA	0.299023	0.0326955	2.32594		-0.266327		NA
+pH fractionation/SP	Q9NQR4	Q9NQR4	AGTEEAIVYSDIDLK	[K].AGTEEAIVYSDIDLK.[K]		0	1	7	0.798955	-1.27856	0.290496	3.13547	-2.07752	0.316899	0.820259	-0.609947	-1.67659	1.47295	0.351914	-1.06665	0.289493	0.999952
+pH fractionation/SP	Q9NQR4	Q9NQR4	AGTEEAIVYSDIDLKK	[K].AGTEEAIVYSDIDLKK.[L]		0.000398881	1	1	0.54627	0.968519	1.21539	1.29886	0.422249	0.702038	0.910372	-1.40574	-1.22959	4.45894	1.54719	0.176156	0.950583	0.999952
+pH fractionation/SP	Q15645	Q15645	AGTEPSDAIR	[R].AGTEPSDAIR.[V]		9.74898e-05	1	7	-1.20457	-1.77985	1.01097	1.95682	-0.575283	0.682985	0.904876	-1.95406						NA
+pH fractionation/SP	Q13813; Q13813-2	Q13813-3; Q13813; Q13813-2	AGTFQAFEQFGQQLLAHGHYASPEIK	[R].AGTFQAFEQFGQQLLAHGHYASPEIK.[Q]		0	2	10	-1.80324	-0.395409	2.10556	0.456019	1.40783	0.320952	0.820259	-1.72517	-1.33025	3.24592	2.52978	0.394925	0.886579	0.999952
+pH fractionation/SP	Q9UIG0	Q9UIG0; Q9UIG0-2	AGTGENAPWVVEDELVK	[R].AGTGENAPWVVEDELVK.[K]		0	1	7		-0.575744					NA	-1.55041	-0.0998652	2.87135	0.571213	1.45054	0.550173	0.999952
+pH fractionation/SP	O43175	O43175	AGTGVDNVDLEAATR	[R].AGTGVDNVDLEAATR.[K]		0	1	36	-3.0063	-3.35812	0.818395	2.46026	-0.351822	0.865541	0.962597	0.283236	-4.58852		2.62819	-4.87176		NA
+pH fractionation/SP	O43175	O43175	AGTGVDNVDLEAATRK	[R].AGTGVDNVDLEAATRK.[G]		4.19381e-05	1	3	-1.94706	-3.78359	1.36038	0.940026	-1.83654	0.202138	0.818997	-2.00783	-3.54418	1.11573		-1.53635		NA
+pH fractionation/SP	Q96G23	Q96G23	AGTLIMALHDSSDYLLESAK	[R].AGTLIMALHDSSDYLLESAK.[M]		0	1	3	-2.98871	2.16198	0.288838		5.15069		NA	-0.431286	-0.626317	1.3156	0.714782	-0.195031	0.832557	0.999952
+pH fractionation/SP	Q15269	Q15269	AGTLLPVIQFLQK	[R].AGTLLPVIQFLQK.[S]		4.19381e-05	1	1	-2.30703	-4.25179	0.0309044		-1.94476		NA		-6.09292					NA
+pH fractionation/SP	Q15149	Q15149-4; Q15149; Q15149-6; Q15149-9; Q15149-3; Q15149-8; Q15149-5; Q15149-7; Q15149-2	AGTLSITEFADMLSGNAGGFR	[R].AGTLSITEFADMLSGNAGGFR.[S]		0	1	1	-3.60922	0.260822			3.87004		NA	-0.439502	-0.112807	1.02867	0.615148	0.326695	0.676738	0.999952
+pH fractionation/SP	O43707	O43707-3; O43707	AGTQIENIDEDFR	[K].AGTQIENIDEDFR.[D]		0	1	17	-0.348641	-1.68021	0.388429	0.731199	-1.33157	0.0700043	0.818997	-2.18848		0.0817447				NA
+pH fractionation/SP	O43707	O43707-3; O43707	AGTQIENIDEDFRDGLK	[K].AGTQIENIDEDFRDGLK.[L]		0	1	1	-3.60306	-1.99442	0.142556	0.132487	1.60864	0.00723879	0.613938	-4.21705	-3.16982	2.48558	0.642587	1.04723	0.622304	0.999952
+pH fractionation/SP	P12814	P35609-2; P12814-2; P12814; P12814-3; P12814-4; Q08043; P35609	AGTQIENIEEDFR	[K].AGTQIENIEEDFR.[ND]		0	1	14	4.14576	1.73308	0.329778	3.11141	-2.41268	0.25261	0.818997	0.701509	-1.27579	3.82268	3.04999	-1.9773	0.522322	0.999952
+pH fractionation/SP	P12814	P12814-2; P12814; P12814-3; P12814-4	AGTQIENIEEDFRDGLK	[K].AGTQIENIEEDFRDGLK.[L]		4.19381e-05	1	4	-3.85343	1.34524			5.19867		NA	0.388224	-2.5958	1.20356	1.13722	-2.98402	0.125602	0.999952
+pH fractionation/SP	P23771-2	P23771; P23771-2	AGTSCANCQTTTTTLWR	[R].AGTSCANCQTTTTTLWR.[R]	2xCarbamidomethyl [C5; C8]	0	1	3		-0.484119					NA	-1.59554	-1.20034		0.652791	0.395199		NA
+pH fractionation/SP	Q12769	Q12769	AGTVMFEYGMR	[K].AGTVMFEYGMR.[L]		4.19381e-05	1	7	0.906669	2.39457	0.596537	0.823667	1.4879	0.0643875	0.818997	1.15656	2.00988	0.714181	1.95783	0.85332	0.51735	0.999952
+pH fractionation/SP	Q14690	Q14690	AGTYFSNQAVR	[K].AGTYFSNQAVR.[A]		4.19381e-05	1	7	-4.53617	1.78296			6.31912		NA	1.78964	1.9038	0.93541	0.161488	0.114164	0.880592	0.999952
+pH fractionation/SP	Q15149	Q15149-4; Q15149; Q15149-6; Q15149-9; Q15149-3; Q15149-8; Q15149-5; Q15149-7; Q15149-2	AGVAAPATQVAQVTLQSVQR	[K].AGVAAPATQVAQVTLQSVQR.[R]		0	1	4		-3.33751					NA	-0.0944995	-3.94281	0.185769	3.63648	-3.84831	0.27362	0.999952
+pH fractionation/SP	P21333	P21333; P21333-2	AGVAPLQVK	[K].AGVAPLQVK.[V]		9.74898e-05	1	31	-1.26873	-0.363065	0.265984	0.31209	0.905661	0.018691	0.723776	0.360428	0.518782	1.33847	0.849515	0.158354	0.871043	0.999952
+pH fractionation/SP	Q9UJ70-2	Q9UJ70; Q9UJ70-2	AGVDPLVPLR	[K].AGVDPLVPLR.[S]		4.19381e-05	1	10	-2.24517	-1.36407	1.05042	0.143478	0.881103	0.22342	0.818997	-1.00863	-0.378271	0.927014	0.519435	0.630359	0.458663	0.999952
+pH fractionation/SP	Q16698	Q16698-2; Q16698	AGVEAMSK	[K].AGVEAMSK.[S]		0.00187141	1	1	-0.731394	-2.05406	0.0553545		-1.32266		NA	-0.100942	0.519124	1.39169	1.50879	0.620066	0.710822	0.999952
+pH fractionation/SP	O75369-8	O75369-9; O75369-5; O75369-2; O75369-8; O75369-7; O75369-4; O75369-6; O75369; O75369-3	AGVENGKPTHFTVYTK	[K].AGVENGKPTHFTVYTK.[G]		3.35083e-05	1	1	-0.125357	-2.51265	0.967361	2.48494	-2.38729	0.208588	0.818997	-1.08903	-2.85402			-1.76499		NA
+pH fractionation/SP	Q14997	Q14997	AGVGEPPEPGGRPEPGPR	[R].AGVGEPPEPGGRPEPGPR.[G]		0.000420983	1	2	-2.35022		1.07994				NA		-1.63854		1.4358			NA
+pH fractionation/SP	Q9P0M6; O75367	O75367-3; O75367-2; Q9P0M6; O75367	AGVIFPVGR	[KR].AGVIFPVGR.[ML]		9.74898e-05	2	21	3.68944	3.50199	0.148515	1.97839	-0.187448	0.877944	0.966566	1.95166	2.21714	2.12802	0.693253	0.265486	0.847246	0.999952
+pH fractionation/SP	Q92506	Q92506	AGVIGLTQTAAR	[K].AGVIGLTQTAAR.[E]		0.000275366	1	1	-2.41578	1.12169	1.34503		3.53747		NA	0.636201						NA
+pH fractionation/SP	P62873; P62879	Q9HAV0; P62873; P62873-2; P62879-2; P62879	AGVLAGHDNR	[R].AGVLAGHDNR.[V]		3.35083e-05	2	36	0.51487	-0.353005	1.04012	0.461845	-0.867874	0.257045	0.818997	-1.23321	-1.80598	2.31782	0.750529	-0.572768	0.70471	0.999952
+pH fractionation/SP	P35580-3; P35579	P35580-2; P35580; P35580-5; P35580-3; P35579; P35580-4; P35579-2	AGVLAHLEEER	[R].AGVLAHLEEER.[D]		0	2	59	-2.58586	-2.36564	1.10238	0.385471	0.220216	0.760339	0.928459	-1.25668	-2.82936			-1.57268		NA
+pH fractionation/SP	Q9Y224	Q9Y224	AGVMALANLLQIQR	[K].AGVMALANLLQIQR.[H]		3.35083e-05	1	1	-3.91982	-2.21999	2.83653	0.90496	1.69983	0.378715	0.830733	-2.57254	-2.81682	2.09492	0.437126	-0.244282	0.88683	0.999952
+pH fractionation/SP	O75340	O75340-2; O75340	AGVNFSEFTGVWK	[K].AGVNFSEFTGVWK.[Y]		3.35083e-05	1	9	2.08254	1.57531	0.359521	2.21227	-0.507232	0.715058	0.914064	1.1245	-0.401151	1.26929	0.869452	-1.52565	0.161009	0.999952
+pH fractionation/SP	P62424	P62424	AGVNTVTTLVENK	[R].AGVNTVTTLVENK.[K]		0	1	53	-0.984511	0.100801	0.0196576	2.17934	1.08531	0.554233	0.871194	0.448181	1.54446	2.7519	0.412766	1.09627	0.633457	0.999952
+pH fractionation/SP	P62424	P62424	AGVNTVTTLVENKK	[R].AGVNTVTTLVENKK.[A]		0	1	23	-1.27299	-0.853998	0.979308	0.484191	0.418997	0.542836	0.868691	-3.04228	-1.90298	0.634729	0.922701	1.1393	0.286859	0.999952
+pH fractionation/SP	P53350	P53350	AGVPGVAAPGAPAAAPPAK	[K].AGVPGVAAPGAPAAAPPAK.[E]		4.19381e-05	1	5	-0.188018	-1.3667	1.76216	2.38656	-1.17868	0.563085	0.874214	-0.135962	-1.99196	0.45395		-1.85599		NA
+pH fractionation/SP	P18583-5; P18583-3	P18583; P18583-4; P18583-6; P18583-5; P18583-10; P18583-9; P18583-2; P18583-3; P18583-7; KIAA1019_1056_I1; KIAA1019_1056_E1	AGVPLPPNLKPAPPPTIEEK	[K].AGVPLPPNLKPAPPPTIEEK.[V]		0	2	23		-0.511337					NA	-1.45286	-0.492692	2.04303	0.413381	0.960171	0.581616	0.999952
+pH fractionation/SP	Q9UK61	Q9UK61; Q9UK61-4; Q9UK61-3; Q9UK61-2	AGVQEFVDGLHEK	[K].AGVQEFVDGLHEK.[L]		0	1	7	-0.949796	0.0191506	0.795657	0.0220468	0.968947	0.200866	0.818997	1.05076						NA
+pH fractionation/SP	Q8N7H5	Q8N7H5-3; Q8N7H5; Q8N7H5-2	AGVQSGTNALLVVK	[K].AGVQSGTNALLVVK.[H]		0	1	7	-0.0545697	-0.00302359	0.8312	1.52994	0.0515461	0.961564	0.988961	-0.486987	-2.57631	3.00141	0.88296	-2.08932	0.3098	0.999952
+pH fractionation/SP	Q86VM9	Q86VM9; Q86VM9-2	AGVQSVGEK	[K].AGVQSVGEK.[E]		0.000192563	1	1	-3.00005	-5.27484	2.02922	2.88873	-2.27479	0.366938	0.829318		-5.37667		3.59265			NA
+pH fractionation/SP	Q12789	Q12789-3; Q12789	AGVRPSSSGSAWEACSEAPSK	[R].AGVRPSSSGSAWEACSEAPSK.[G]	1xCarbamidomethyl [C15]	0	1	3	-3.629	-2.39393	0.805912	2.22437	1.23507	0.522679	0.862827	-1.88391	-0.498524	1.75735	0.749013	1.38538	0.385795	0.999952
+pH fractionation/SP	P30876	P30876	AGVSQVLNR	[R].AGVSQVLNR.[L]		0.000114852	1	12	-0.443611	-0.887751	0.258254	1.72794	-0.444139	0.682463	0.904835	-1.23963	-1.0423	1.20611	1.26626	0.197334	0.873366	0.999952
+pH fractionation/SP	P52948	P52948-2; P52948-4; P52948; P52948-3; P52948-6; P52948-5	AGVSTNISTK	[K].AGVSTNISTK.[H]		4.19381e-05	1	1		1.26121		0.669157			NA	0.18187	1.242	1.67496	0.607591	1.06013	0.471059	0.999952
+pH fractionation/SP	Q5T3I0-3	Q5T3I0-3; Q5T3I0	AGVSTVQK	[R].AGVSTVQK.[A]		0.000177325	1	2	5.88885	4.92801	0.615853	0.601834	-0.960837	0.125427	0.818997	5.83862	4.23901	1.22217	3.27091	-1.59961	0.471919	0.999952
+pH fractionation/SP	Q02880	Q02880-2; Q02880	AGVSVKPFQVK	[K].AGVSVKPFQVK.[N]		4.19381e-05	1	6	-3.27739	1.41857	1.16145	0.717414	4.69597	0.0103107	0.658244	0.942993	2.54726	0.971368	0.567368	1.60427	0.0689403	0.999952
+pH fractionation/SP	P36776	P36776-2; P36776-3; P36776	AGVTCIVLPAENK	[R].AGVTCIVLPAENK.[K]	1xCarbamidomethyl [C5]	3.35083e-05	1	14	1.77875	2.32703	0.297185	0.566847	0.548279	0.21203	0.818997	3.02444	2.73335	1.07266	1.15819	-0.291091	0.765419	0.999952
+pH fractionation/SP	Q0VDF9	Q0VDF9	AGVVANDAGDR	[R].AGVVANDAGDR.[V]		8.08306e-05	1	5	3.88718	0.769285	0.592907	3.07257	-3.11789	0.159471	0.818997	0.82038	0.152057	2.95656	2.79146	-0.668323	0.813726	0.999952
+pH fractionation/SP	Q15149	Q15149-4; Q15149; Q15149-6; Q15149-9; Q15149-3; Q15149-8; Q15149-5; Q15149-7; Q15149-2	AGVVGPELHEQLLSAEK	[K].AGVVGPELHEQLLSAEK.[A]		0	1	4	-0.461423	1.82571	0.0659573	1.3873	2.28713	0.145255	0.818997	-1.97341	-0.0321341	1.56303		1.94128		NA
+pH fractionation/SP	Q9H8P0	Q9H8P0	AGVVIHCNHR	[K].AGVVIHCNHR.[I]	1xCarbamidomethyl [C7]	0.000387362	1	1	-0.904606	0.945087	1.01019	0.0570346	1.84969	0.0913011	0.818997	0.298101	-0.100281	0.806161	1.47757	-0.398382	0.702849	0.999952
+pH fractionation/SP	Q86U90	Q86U90	AGWTEALR	[R].AGWTEALR.[A]		0.000553704	1	4	-0.0416414	-0.390755	1.03199	1.45011	-0.349114	0.768612	0.93134	-1.5574	-0.994677	1.21069	0.0861469	0.562727	0.577545	0.999952
+pH fractionation/SP	P48200	P48200-2; P48200	AGYAFEYLIETLNDSSHK	[K].AGYAFEYLIETLNDSSHK.[K]		0	1	1	-3.04723	-1.13052	1.27984	2.10777	1.91671	0.249439	0.818997	-0.0783118	-2.69532		0.0971112	-2.61701		NA
+pH fractionation/SP	O96019	O96019; O94805	AGYAGEDCPK	[R].AGYAGEDCPK.[VA]	1xCarbamidomethyl [C8]	4.19381e-05	1	7	0.0464433	-1.21926	0.397604	1.08831	-1.2657	0.131439	0.818997	-1.68735	-1.03355		1.13313	0.653806		NA
+pH fractionation/SP	Q08211	Q08211; Q08211-2	AGYGAGVGGGYR	[R].AGYGAGVGGGYR.[G]		0.00030511	1	1	3.74327	-1.76768	0.134453	5.68933	-5.51095	0.16355	0.818997	0.183048	-1.70942	5.07873	3.75651	-1.89246	0.631223	0.999952
+pH fractionation/SP	P10253	P10253	AGYIIPLQGPGLTTTESR	[R].AGYIIPLQGPGLTTTESR.[Q]		0.000332976	1	1	-3.1811	-0.273177	0.926519	3.28862	2.90792	0.21445	0.818997	0.182917	-0.246809	1.44221	2.42843	-0.429727	0.805163	0.999952
+pH fractionation/SP	O95470	O95470	AGYPLEHPFDFR	[K].AGYPLEHPFDFR.[V]		0.000360009	1	5	-0.677001	-1.99349	0.441727	2.14127	-1.31649	0.344352	0.824979	-2.43356	-2.01244	1.8775	1.63311	0.421116	0.83314	0.999952
+pH fractionation/SP	P42704	P42704	AGYPQYVSEILEK	[K].AGYPQYVSEILEK.[V]		3.35083e-05	1	17	-3.29325	-1.20508	1.0992		2.08817		NA	-1.45569	-1.89053	0.733342	0.41574	-0.434836	0.541569	0.999952
+pH fractionation/SP	Q15437	Q15437	AGYQDMPEYENFK	[K].AGYQDMPEYENFK.[H]		4.19381e-05	1	8	1.59776	0.387933	0.0679954	2.08296	-1.20983	0.371555	0.829318	-3.67547	-1.96998	0.971328	0.72888	1.70549	0.0717878	0.999952
+pH fractionation/SP	Q9UNF1	Q9UNF1; Q9UNF1-2	AGYSLEK	[R].AGYSLEK.[V]		0.00367857	1	2	-1.83446	0.0250764	1.81585	2.21841	1.85954	0.3241	0.82068	-1.02783	-0.849173	0.933008	0.148471	0.178657	0.814188	0.999952
+pH fractionation/SP	Q96KR1	Q96KR1	AGYSQGATQYTQAQQTR	[K].AGYSQGATQYTQAQQTR.[Q]		0	1	3		-1.173					NA	-3.7027	-3.17585	1.50193	2.62281	0.526843	0.786411	0.999952
+pH fractionation/SP	Q8TBM8	Q8TBM8-2; Q8TBM8	AGYSQQHQHR	[R].AGYSQQHQHR.[H]		0.00145874	1	2	2.97425	1.1334	0.881686	1.1395	-1.84084	0.0913208	0.818997	0.976064	-1.05834	1.23594	0.481267	-2.0344	0.0565846	0.999952
+pH fractionation/SP	P06733-2; P06733	P06733-2; P06733	AGYTDKVVIGMDVAASEFFR	[K].AGYTDKVVIGMDVAASEFFR.[S]		0	2	8	2.39677	3.0394	0.279791	1.50122	0.642629	0.506453	0.859685	3.72382	3.70446	0.807261	0.998198	-0.0193579	0.980415	0.999952
+pH fractionation/SP	P46777	P46777	AHAAIRENPVYEK	[K].AHAAIRENPVYEK.[K]		0.000114852	1	2	-0.605042	-0.799513	0.791077	2.12259	-0.194471	0.888987	0.969126	-0.00487468	0.71717	1.05675	0.584903	0.722045	0.456039	0.999952
+pH fractionation/SP	P46777	P46777	AHAAIRENPVYEKKPK	[K].AHAAIRENPVYEKKPK.[K]		6.09156e-05	1	1		-0.412754					NA	-0.575148	0.70701	2.50412	0.206185	1.28216	0.545467	0.999952
+pH fractionation/SP	Q9BQA1	Q9BQA1	AHAAQVTCVAASPHK	[R].AHAAQVTCVAASPHK.[D]	1xCarbamidomethyl [C8]	0	1	12	-0.138355	-1.23604	4.38864	4.2219	-1.09769	0.770481	0.931647	1.39885	2.03355	0.938505	0.0432813	0.634699	0.431338	0.999952
+pH fractionation/SP	O00170	O00170	AHAAVWNAQEAQADFAK	[K].AHAAVWNAQEAQADFAK.[V]		0	1	6	0.147598	0.558156	0.280159	0.388696	0.410559	0.211935	0.818997	-2.01029	-0.842727	1.79595	1.19519	1.16756	0.401619	0.999952
+pH fractionation/SP	Q6PCB5	Q6PCB5-2; Q6PCB5	AHADHIGQGFER	[R].AHADHIGQGFER.[Q]		4.19381e-05	1	3	4.98946	4.93223	0.540763	1.82092	-0.0572315	0.960883	0.98867	3.511	3.36342	1.13788	1.49104	-0.147581	0.90651	0.999952
+pH fractionation/SP	Q15149	Q15149-4; Q15149; Q15149-6; Q15149-9; Q15149-3; Q15149-8; Q15149-5; Q15149-7; Q15149-2	AHAFAVQQK	[K].AHAFAVQQK.[E]		0.000275366	1	2	-4.17337	-0.468573			3.70479		NA	-0.795458	0.0564717	0.752795	0.37398	0.85193	0.177178	0.999952
+pH fractionation/SP	Q14697; Q14697-2	Q14697; Q14697-2	AHAHLDTGR	[R].AHAHLDTGR.[R]		4.19381e-05	2	17	-1.04513	-2.07586	0.0558543		-1.03073		NA	-4.46692	-3.0129	0.666641	0.93859	1.45402	0.129772	0.999952
+pH fractionation/SP	P42695	P42695	AHAIITLGK	[R].AHAIITLGK.[L]		0.000776576	1	2	-1.56433	-0.538683	0.117563		1.02564		NA	-1.34546	0.0127171	0.710109	1.46619	1.35817	0.24292	0.999952
+pH fractionation/SP	P50148	P50148	AHAQLVR	[K].AHAQLVR.[E]		0.00453601	1	6	2.16534	-0.935016	0.688038	5.23644	-3.10036	0.366765	0.829318	0.35266	0.286835	3.60869	0.365952	-0.0658249	0.982059	0.999952
+pH fractionation/SP	Q9Y490	Q9Y490	AHATGAGPAGR	[K].AHATGAGPAGR.[Y]		9.74898e-05	1	8	-2.00211	-4.18139	0.139631		-2.17927		NA	-2.63095	-5.23108		1.0503	-2.60013		NA
+pH fractionation/SP	Q8WUM0	Q8WUM0	AHATLLGLANMETR	[K].AHATLLGLANMETR.[Y]		4.19381e-05	1	12	2.47191	1.89859	0.354861	0.816597	-0.573321	0.327208	0.82168	1.59501	0.12157	0.857874	1.03941	-1.47344	0.1312	0.999952
+pH fractionation/SP	P43403	P43403	AHCGPAELCEFYSR	[K].AHCGPAELCEFYSR.[D]	2xCarbamidomethyl [C3; C9]	4.19381e-05	1	8	0.774161	1.42074	0.835306	0.662256	0.646584	0.352725	0.826272	2.03267	0.826939	0.679812	1.40226	-1.20574	0.251265	0.999952
+pH fractionation/SP	O60281	O60281-2; O60281	AHCQLVHHFTTEEMVK	[R].AHCQLVHHFTTEEMVK.[L]	1xCarbamidomethyl [C3]	0.000332976	1	1	2.28157	1.38395	0.802285	2.25486	-0.897622	0.551365	0.87065	2.61278	3.35947	1.39254	0.597084	0.746691	0.441439	0.999952
+pH fractionation/SP	P22033	P22033	AHCQTSGWSLTEQDPYNNIVR	[R].AHCQTSGWSLTEQDPYNNIVR.[T]	1xCarbamidomethyl [C3]	4.19381e-05	1	1	-1.83458	-0.982109	0.191746	0.51332	0.852467	0.120233	0.818997		-3.52071		1.40246			NA
+pH fractionation/SP	Q05048	Q05048	AHDGAEVCSAIFSK	[K].AHDGAEVCSAIFSK.[N]	1xCarbamidomethyl [C8]	0	1	18	-1.05056	-1.33159	0.825582	0.941839	-0.281035	0.756087	0.92713	-0.601346	-2.36611			-1.76477		NA
+pH fractionation/SP	O75083	O75083-3; O75083	AHDGGIYAISWSPDSTHLLSASGDK	[K].AHDGGIYAISWSPDSTHLLSASGDK.[T]		0	1	36	3.13734	1.99066	0.442799	3.04551	-1.14667	0.553851	0.871161	0.917625	0.123836	1.92963	0.876425	-0.79379	0.551874	0.999952
+pH fractionation/SP	O75083	O75083-3; O75083	AHDGGIYAISWSPDSTHLLSASGDKTSK	[K].AHDGGIYAISWSPDSTHLLSASGDKTSK.[I]		0	1	4	0.409544	1.72193	1.12881	1.33477	1.31239	0.263346	0.818997	-0.313224	-0.772397	3.39133	0.717359	-0.459173	0.868873	0.999952
+pH fractionation/SP	Q08209; P16298-4; P48454-3	Q08209-2; Q08209-3; P16298; Q08209; P48454-2; P16298-2; P16298-4; P16298-3; P48454-3; PPP3CB_3607_I1; P48454; Q08209-5	AHEAQDAGYR	[R].AHEAQDAGYR.[M]		4.19381e-05	3	10	6.8122	2.20262	0.500746	2.27409	-4.60958	0.0265666	0.774316	2.45522	2.82283	1.79992	1.73412	0.367606	0.811478	0.999952
+pH fractionation/SP	Q9HCU5	Q9HCU5	AHEGEIEDLALGPDGK	[K].AHEGEIEDLALGPDGK.[L]		0	1	10	-1.00271	-1.66058	0.56094	0.0364704	-0.657862	0.21404	0.818997	-1.82909	-2.47192		1.27989	-0.642821		NA
+pH fractionation/SP	P50990	P50990; P50990-3; P50990-2	AHEILPNLVCCSAK	[K].AHEILPNLVCCSAK.[N]	2xCarbamidomethyl [C10; C11]	0	1	12	0.727354	0.0840526	1.24894	0.460392	-0.643301	0.449644	0.846322	-0.62038	-0.58484	1.3153	1.11199	0.0355403	0.973202	0.999952
+pH fractionation/SP	Q9NWH9	Q9NWH9	AHELIEAEGIEDIEK	[R].AHELIEAEGIEDIEK.[E]		0	1	4	-1.2578	0.144644	0.524928		1.40245		NA	-2.07136	-0.952875		0.702094	1.11848		NA
+pH fractionation/SP	P21333	P21333; P21333-2	AHEPTYFTVDCAEAGQGDVSIGIK	[K].AHEPTYFTVDCAEAGQGDVSIGIK.[C]	1xCarbamidomethyl [C11]	4.19381e-05	1	5	-1.05649	-1.34784	0.719731		-0.291341		NA	-3.471	-5.08882	1.94689		-1.61782		NA
+pH fractionation/SP	P13073	P13073	AHESVVK	[R].AHESVVK.[S]		0.00995925	1	3	2.05837	1.15548	0.266473		-0.902887		NA	0.27699	-2.33359	1.67726		-2.61058		NA
+pH fractionation/SP	Q14676	Q14676; Q14676-2; Q14676-4; Q14676-3	AHEVGAQGGPPVAQVEQDLPISR	[R].AHEVGAQGGPPVAQVEQDLPISR.[E]		0	1	9	-5.65991	-1.48607		4.29478	4.17384		NA	0.682077	3.12549	4.32093	2.0922	2.44342	0.42781	0.999952
+pH fractionation/SP	Q9NVF7	Q9NVF7; FBXO28_3323_I1	AHEVLQELR	[R].AHEVLQELR.[D]		0.0024516	1	4		0.783862					NA	1.6717	1.72957	0.640713	0.596402	0.0578671	0.923981	0.999952
+pH fractionation/SP	Q9BXS5-2	Q9BXS5; Q9BXS5-2	AHFGLPSVEAEDK	[R].AHFGLPSVEAEDK.[E]		4.19381e-05	1	11	0.147656	1.13598	0.332355	1.27621	0.988324	0.264062	0.818997	2.4143	3.1743	2.04451	0.788944	0.759992	0.580434	0.999952
+pH fractionation/SP	Q15102	Q15102	AHFLDADPGFVHSDGTISHHDMYDYLHLSR	[R].AHFLDADPGFVHSDGTISHHDMYDYLHLSR.[L]		0	1	3	0.526119	-1.86147	1.33254	1.04864	-2.38759	0.126496	0.818997	-1.48539	-2.78678	2.51829	1.00108	-1.30139	0.455538	0.999952
+pH fractionation/SP	Q8IUF8	Q8IUF8-2; Q8IUF8-4; Q8IUF8	AHFLQLR	[K].AHFLQLR.[K]		0.00490142	1	4	0.518112	-1.50648	0.207568	1.80865	-2.02459	0.126991	0.818997	-2.68473	-3.09192	1.98435	0.560833	-0.407192	0.804691	0.999952
+pH fractionation/SP	Q9Y4L1	Q9Y4L1; Q9Y4L1-2	AHFNLDESGVLSLDR	[K].AHFNLDESGVLSLDR.[V]		4.19381e-05	1	3	0.3382	-1.24909	0.756227	1.53897	-1.58729	0.184127	0.818997	-1.85277	-1.59899	0.724825	0.722235	0.253785	0.726267	0.999952
+pH fractionation/SP	Q8WZA9	Q8WZA9	AHFPGPVTR	[R].AHFPGPVTR.[A]		0.00977752	1	4	0.0728865	1.07557	0.136285	0.498146	1.00269	0.0377719	0.817021	-0.350781	-4.66558	1.63402		-4.3148		NA
+pH fractionation/SP	Q92973	Q92973; Q92973-2	AHFQNFPNGVTDFIK	[K].AHFQNFPNGVTDFIK.[S]		6.09156e-05	1	2	3.65725	3.00495	0.410648	2.31071	-0.652299	0.655381	0.899252	1.77651	1.73021	2.44315	0.777715	-0.046305	0.976544	0.999952
+pH fractionation/SP	Q9NYK5-2	Q9NYK5; Q9NYK5-2	AHFTIWDK	[R].AHFTIWDK.[L]		0.000962224	1	3	1.43576	-1.35917	0.511454	3.54719	-2.79494	0.239193	0.818997	-1.60329	-0.68564	4.28369		0.917652		NA
+pH fractionation/SP	Q5TBK1	Q5TBK1	AHGGFTNESSYHR	[R].AHGGFTNESSYHR.[R]		0.000177325	1	1	0.476259	0.316624	0.200656	1.7581	-0.159635	0.883401	0.967753	-0.148246	-0.152541	1.2588	0.481574	-0.00429554	0.99586	0.999952
+pH fractionation/SP	P06576	P06576	AHGGYSVFAGVGER	[K].AHGGYSVFAGVGER.[T]		0	1	28	-2.46112	-0.584396	0.124591	2.40828	1.87672	0.248953	0.818997	1.35435	1.95291	2.92723	1.26018	0.598556	0.761256	0.999952
+pH fractionation/SP	Q14980-2; Q14980	NUMA1_2515_I0; Q14980-3; Q14980-2; Q14980-4; Q14980; NUMA1_2515_E0	AHGLLAEENR	[K].AHGLLAEENR.[G]		4.19381e-05	2	19	-3.72202	-0.214879	0.637101	3.55065	3.50714	0.302923	0.819326	0.0447788	1.85306	3.84306	0.380057	1.80828	0.462848	0.999952
+pH fractionation/SP	P18077	P18077	AHGNSGMVR	[R].AHGNSGMVR.[A]		0.000387362	1	8	1.32046	-0.359348	0.281867	2.1429	-1.67981	0.249481	0.818997	-0.367644	-3.2279	1.21824	1.17744	-2.86025	0.043068	0.999952
+pH fractionation/SP	Q16531	Q16531	AHGNVQDR	[R].AHGNVQDR.[I]		0.00311592	1	2	-1.88973	-1.69964	0.598015		0.190092		NA	-3.75539	-2.19438	1.43446		1.56102		NA
+pH fractionation/SP	P01130	P01130-2; P01130-3; P01130-5; P01130-4; P01130-6; P01130	AHGVSSYDTVISR	[R].AHGVSSYDTVISR.[D]		0.000192563	1	3	0.940368	0.175636	1.79655	2.40064	-0.764733	0.681503	0.904835	1.17989	0.239397	1.08387	1.54172	-0.940493	0.43614	0.999952
+pH fractionation/SP	O75122; O75122-3	O75122-2; O75122; O75122-3	AHHAAGQSVR	[K].AHHAAGQSVR.[R]		0	2	4	-0.981906	-2.17263	0.00777809		-1.19073		NA		-2.96092		0.236338			NA
+pH fractionation/SP	P61244	P61244-5; P61244-3; P61244-4; P61244-6; P61244; P61244-2	AHHNALER	[R].AHHNALER.[K]		6.09156e-05	1	5		-1.16759					NA	-1.21666	-0.98899	1.58047	0.159919	0.227674	0.858127	0.999952
+pH fractionation/SP	Q99447	Q99447; Q99447-3; Q99447-4; Q99447-2	AHHSSQEMSSEYR	[K].AHHSSQEMSSEYR.[E]		9.74898e-05	1	1	-2.52723	0.175313	0.210752		2.70255		NA	-0.110648	0.560142	2.33781	0.164778	0.67079	0.724829	0.999952
+pH fractionation/SP	Q00610	Q00610; P53675-2; P53675; Q00610-2	AHIAQLCEK	[R].AHIAQLCEK.[A]	1xCarbamidomethyl [C7]	6.09156e-05	1	12	4.69691	2.90432	0.734656	3.10346	-1.79259	0.38541	0.831494	4.32348	2.9731	1.2538	2.4658	-1.35038	0.445432	0.999952
+pH fractionation/SP	Q9HCE1	Q9HCE1; Q9HCE1-2	AHILACAPSNSGADLLCQR	[K].AHILACAPSNSGADLLCQR.[L]	2xCarbamidomethyl [C6; C17]	3.35083e-05	1	1	-3.33897	-2.8605	3.86983	4.50571	0.478475	0.895773	0.971271	0.430022	2.32649	3.80355	0.167435	1.89646	0.551584	0.999952
+pH fractionation/SP	Q5JTH9	Q5JTH9-3; Q5JTH9-2; Q5JTH9	AHINLVR	[K].AHINLVR.[L]		0.00467031	1	6	1.04768	1.31101	0.303914	0.380227	0.263335	0.401794	0.835161	0.946579	1.41648	0.991076	0.728811	0.469902	0.544399	0.999952
+pH fractionation/SP	P30520	P30520	AHIVFDFHQAADGIQEQQR	[R].AHIVFDFHQAADGIQEQQR.[Q]		0	1	14	-0.37615	-0.850953	0.702012	1.29385	-0.474803	0.60618	0.885627	0.697496	1.20223	1.58635	0.0680081	0.504737	0.611218	0.999952
+pH fractionation/SP	B0I1T2	B0I1T2	AHLAELQR	[R].AHLAELQR.[R]		0.000398881	1	17	1.7767	1.9589	0.404738	2.32331	0.182198	0.923423	0.979275	0.182247	-0.483776	3.54023	0.908951	-0.666023	0.768077	0.999952
+pH fractionation/SP	P46100	P46100; P46100-3; P46100-4; P46100-6; P46100-5; P46100-2	AHLALEEDLNSEFR	[K].AHLALEEDLNSEFR.[A]		0.00595248	1	1	1.34181	1.36416	0.433356	0.787681	0.0223535	0.967713	0.9905	1.22964	-0.852334	0.198123	2.35052	-2.08197	0.201058	0.999952
+pH fractionation/SP	Q5VTR2	Q5VTR2	AHLDEAR	[K].AHLDEAR.[T]		0.00288581	1	2	4.13923	1.19308	0.479619	3.5943	-2.94614	0.223913	0.818997	1.21838	0.826933	0.331191	0.210027	-0.391444	0.293551	0.999952
+pH fractionation/SP	Q9BTC0	Q9BTC0-1; Q9BTC0	AHLFDLNCK	[R].AHLFDLNCK.[I]	1xCarbamidomethyl [C8]	0.00030511	1	2		-2.25178		2.00471			NA							NA
+pH fractionation/SP	O95696-2	O95696-2; O95696	AHLGLEEQLR	[R].AHLGLEEQLR.[E]		0.000114852	1	4	-1.13169	-3.08991		2.34394	-1.95821		NA		-6.12628					NA
+pH fractionation/SP	Q96ME7	Q96ME7; Q96ME7-2; Q96ME7-3	AHLGSCTLGNFVAGK	[K].AHLGSCTLGNFVAGK.[Y]	1xCarbamidomethyl [C6]	4.19381e-05	1	13	0.495747	0.285549	0.155532	1.98863	-0.210198	0.864051	0.962071	-1.8835	-1.43956	2.80175	0.90748	0.443941	0.806913	0.999952
+pH fractionation/SP	Q9Y6X4	Q9Y6X4	AHLGSSDNVATMSNEER	[K].AHLGSSDNVATMSNEER.[S]		4.19381e-05	1	1	-2.09047	-0.0202509	1.19773		2.07022		NA	-0.119283	0.0304746	0.71559	0.636029	0.149758	0.827405	0.999952
+pH fractionation/SP	P62266	P62266	AHLGTALK	[K].AHLGTALK.[A]		0.000553704	1	21	2.53931	2.37721	0.474158	0.889578	-0.162106	0.794409	0.938909	1.10367	1.17847	1.21275	0.671155	0.074796	0.930028	0.999952
+pH fractionation/SP	Q9H993	Q9H993	AHLILFK	[K].AHLILFK.[G]		0.00856563	1	4	-0.54458	0.248176	0.0259798	0.880032	0.792756	0.186227	0.818997	-0.312717						NA
+pH fractionation/SP	P34897	P34897; P34897-3; P34897-2	AHLLADMAHISGLVAAK	[K].AHLLADMAHISGLVAAK.[V]		0	1	5	-1.18022	0.0841553	0.797743	0.190585	1.26438	0.126962	0.818997	-1.55212	-2.71075	1.62543	1.77949	-1.15863	0.504478	0.999952
+pH fractionation/SP	P39023	P39023	AHLMEIQVNGGTVAEK	[K].AHLMEIQVNGGTVAEK.[L]		0	1	32	-2.57694	-1.10755	1.35476	0.198552	1.46939	0.243594	0.818997	-3.69793	-2.8281			0.869832		NA
+pH fractionation/SP	P39023	P39023	AHLMEIQVNGGTVAEK	[K].AHLMEIQVNGGTVAEK.[L]	1xOxidation [M4]	4.19381e-05	1	6	-2.4983	-1.1865	0.64411	1.03862	1.3118	0.169397	0.818997	-0.168008	-3.15266	0.216238	3.52377	-2.98466	0.207677	0.999952
+pH fractionation/SP	O43166	O43166; O43166-2; O43166-3	AHLQAEVQHLR	[K].AHLQAEVQHLR.[E]		0.000476102	1	1	-2.46147	-1.55568		2.61957	0.905787		NA	0.889342	2.11199	1.75357	0.467669	1.22265	0.308087	0.999952
+pH fractionation/SP	P98175-5	P98175-5; P98175-2; P98175-4; P98175-3; P98175	AHLSENELEALEK	[R].AHLSENELEALEK.[N]		0	1	11	1.2207	0.426812	0.329834	4.87509	-0.79389	0.792351	0.937893	2.71491	3.70729	3.58788	2.96702	0.992376	0.730701	0.999952
+pH fractionation/SP	P62253	P62253	AHLTFPK	[K].AHLTFPK.[D]		0.0024516	1	5	0.492529	-0.886266	0.527354	1.15214	-1.3788	0.152707	0.818997	-1.73037	-1.0747	2.5536	0.00290292	0.655671	0.751304	0.999952
+pH fractionation/SP	Q13310-3	Q13310-2; Q13310-3; Q13310	AHLTNQYMQR	[K].AHLTNQYMQR.[V]		4.19381e-05	1	13	0.45612	1.33237	0.817417	1.01103	0.876247	0.358247	0.828183	-1.34148	-1.16561	0.556921	1.42162	0.175862	0.883087	0.999952
+pH fractionation/SP	P50995	P50995; P50995-2	AHLVAVFNEYQR	[R].AHLVAVFNEYQR.[M]		0.000169063	1	12	0.176563	0.221928	0.344066	0.655598	0.0453645	0.920594	0.978288	0.212411	-0.967184	0.618135	0.000484386	-1.17959	0.114246	0.999952
+pH fractionation/SP	Q00610	Q00610; P53675-2; P53675; Q00610-2	AHMGMFTELAILYSK	[R].AHMGMFTELAILYSK.[F]		4.19381e-05	1	2	-0.441639	-0.857437	0.146271	1.27297	-0.415798	0.691343	0.907815	-0.164921	1.42088	3.53522	0.277716	1.5858	0.591767	0.999952
+pH fractionation/SP	Q06787	Q06787-9; Q06787-8; Q06787-4; Q06787-2; Q06787-11; Q06787-6; Q06787-5; Q06787-10; Q06787-3; Q06787; Q06787-7	AHMLIDMHFR	[R].AHMLIDMHFR.[S]		4.19381e-05	1	3	-2.25469	-0.812783	0.33452	0.775787	1.44191	0.0417142	0.818997	-1.15121	-0.130631	1.73444	0.730161	1.02058	0.400742	0.999952
+pH fractionation/SP	Q99848	Q99848	AHMMNAIK	[K].AHMMNAIK.[K]		0.000802534	1	5	-2.63482	-0.635117	0.177067	0.653699	1.99971	0.0123207	0.678375		-2.94018		1.33699			NA
+pH fractionation/SP	Q99848	Q99848	AHMMNAIK	[K].AHMMNAIK.[K]	1xOxidation [M4]	0.00920822	1	1	-3.91757	-0.173469		2.8047	3.7441		NA	1.57378	0.224316	1.16065	2.56085	-1.34946	0.549007	0.999952
+pH fractionation/SP	Q99848	Q99848	AHMMNAIKK	[K].AHMMNAIKK.[Y]		0.000828499	1	1		-1.49708		1.03595			NA	-0.0251541	0.167931	0.646794	0.531017	0.193085	0.709848	0.999952
+pH fractionation/SP	Q969T7	Q969T7; Q969T7-2	AHNLLCQQK	[K].AHNLLCQQK.[I]	1xCarbamidomethyl [C6]	0.000660158	1	3	1.07162	-1.85001	1.26974	2.44046	-2.92163	0.139684	0.818997	2.86996	-3.25636			-6.12632		NA
+pH fractionation/SP	Q9UI10-2	Q9UI10-3; Q9UI10-2; Q9UI10	AHNVPVLVCCETYK	[R].AHNVPVLVCCETYK.[F]	2xCarbamidomethyl [C9; C10]	4.19381e-05	1	1	-0.803624	-0.262173	0.325313	0.667409	0.54145	0.379172	0.831052	-0.2782	-1.95692	0.481342	4.1466	-1.67872	0.524452	0.999952
+pH fractionation/SP	A8MWD9	P62308; A8MWD9	AHPPELK	[K].AHPPELK.[K]		0.00715608	1	2	-0.210258	-0.10129	0.648582		0.108969		NA	-0.15955	1.86513	1.90767	0.121623	2.02468	0.272869	0.999952
+pH fractionation/SP	Q9UIS9-9	Q9UIS9; Q9UIS9-10; Q9UIS9-12; Q9UIS9-8; Q9UIS9-6; Q9UIS9-11; Q9UIS9-2; Q9UIS9-7; Q9UIS9-5; Q9UIS9-4; Q9UIS9-9	AHPVAVASK	[K].AHPVAVASK.[K]		0.000553704	1	5	3.30574	-0.900854	0.452318	2.92636	-4.20659	0.0696487	0.818997	1.0044	-0.132518	0.541473	0.854818	-1.13691	0.123514	0.999952
+pH fractionation/SP	Q96CS3	Q96CS3	AHPVFYQGTYSQALNDAK	[R].AHPVFYQGTYSQALNDAK.[R]		0	1	5	5.24738	3.25771	0.357748	1.11674	-1.98967	0.0424378	0.818997	1.05307	1.29283	2.28069	1.56444	0.239757	0.887912	0.999952
+pH fractionation/SP	P49590	P49590	AHQEKPNFIIK	[K].AHQEKPNFIIK.[T]		0.00849451	1	4	-0.464832	-2.13282	0.479881	0.935661	-1.66799	0.0515103	0.818997	-0.224419	-3.29225		0.447557	-3.06783		NA
+pH fractionation/SP	O43422	O43422	AHQGNLESQLTSESYYK	[R].AHQGNLESQLTSESYYK.[E]		4.19381e-05	1	1		-0.916575					NA	-1.54276	-0.974873		0.292734	0.567884		NA
+pH fractionation/SP	Q03519	Q03519	AHQILVLQEGK	[R].AHQILVLQEGK.[L]		4.19381e-05	1	5	-0.685941	-0.604548		0.448041	0.081393		NA	-1.49279	-2.80476	1.00911	3.14962	-1.31197	0.529794	0.999952
+pH fractionation/SP	O00161	O00161-2; O00161	AHQITDESLESTR	[R].AHQITDESLESTR.[R]		0.000177325	1	4	0.253919	-1.5252	1.28696	1.60042	-1.77911	0.207881	0.818997	-0.235339	-1.61173		0.515645	-1.37639		NA
+pH fractionation/SP	Q9Y5B9	Q9Y5B9	AHQKELAAQLNEEAK	[R].AHQKELAAQLNEEAK.[R]		3.35083e-05	1	3	3.10869	0.909228	0.667987	2.69533	-2.19946	0.240118	0.818997	-0.077862	0.303198	2.63209	0.600153	0.38106	0.860176	0.999952
+pH fractionation/SP	Q86VP1	Q86VP1; Q86VP1-3; Q86VP1-4; Q86VP1-2	AHQLEEDIVSVTHK	[K].AHQLEEDIVSVTHK.[A]		0.000224101	1	1	0.256038	-2.00462	0.279492	0.778493	-2.26066	0.00907828	0.652823	-0.508743	-1.67844	0.3688	0.106694	-1.1697	0.0498703	0.999952
+pH fractionation/SP	O00743-3	O00743-3; O00743-2; O00743	AHQLVHEGYK	[R].AHQLVHEGYK.[F]		0	1	18	-0.537495	-1.84499	0.73848	0.354948	-1.30749	0.110034	0.818997	-1.96022	-1.11724	1.26975	0.161964	0.842974	0.440367	0.999952
+pH fractionation/SP	P60510	P60510	AHQLVMEGYK	[R].AHQLVMEGYK.[W]		4.19381e-05	1	12	0.0584148	-0.0817489	0.79083	2.42328	-0.140164	0.928705	0.980975	-1.14446	-2.48715	0.468803	1.33251	-1.34269	0.185474	0.999952
+pH fractionation/SP	P62714; P67775	P62714; P67775	AHQLVMEGYNWCHDR	[R].AHQLVMEGYNWCHDR.[N]	1xCarbamidomethyl [C12]; 1xOxidation [M6]	4.19381e-05	2	1	0.253974						NA	-0.0525341	-2.08311		1.45826	-2.03057		NA
+pH fractionation/SP	P62714; P67775	P62714; P67775	AHQLVMEGYNWCHDR	[R].AHQLVMEGYNWCHDR.[N]	1xCarbamidomethyl [C12]	0	2	9	2.1899	1.29964	0.105112	1.02305	-0.890258	0.208163	0.818997	0.768033	-1.57713	1.13671	2.98272	-2.34516	0.272118	0.999952
+pH fractionation/SP	Q16891-2	Q16891-4; Q16891-2; Q16891-3; Q16891	AHQLWLSVEALK	[K].AHQLWLSVEALK.[Y]		0.0046615	1	1	3.96428	3.73019	0.191621	0.371555	-0.234092	0.387033	0.831888	3.21171	4.18252	1.83841	0.558272	0.970819	0.430878	0.999952
+pH fractionation/SP	P62136; P36873-2; P62140	P62136; P36873; P62136-2; P36873-2; P62136-3; P62140	AHQVVEDGYEFFAK	[R].AHQVVEDGYEFFAK.[R]		0	3	41	-1	0.728537	2.57757	1.08688	1.72854	0.344782	0.824979	1.57708	1.59173	1.29627	0.54122	0.0146462	0.989313	0.999952
+pH fractionation/SP	P62136; P36873-2; P62140	P62136; P36873; P62136-2; P36873-2; P62136-3; P62140	AHQVVEDGYEFFAKR	[R].AHQVVEDGYEFFAKR.[Q]		0	3	5	0.499722	-0.518117	0.594282	1.76529	-1.01784	0.397497	0.834431	0.597005	0.841412	1.85012	1.74181	0.244408	0.87577	0.999952
+pH fractionation/SP	Q9Y2Z4	Q9Y2Z4	AHSGAQGLLAAQK	[K].AHSGAQGLLAAQK.[A]		4.19381e-05	1	6	-2.6175	-0.217119	1.16268	0.368088	2.40038	0.0736017	0.818997	1.29799	-1.48972		0.412366	-2.78771		NA
+pH fractionation/SP	Q02543	Q02543	AHSIQIMK	[R].AHSIQIMK.[V]	1xOxidation [M7]	0.000828499	1	8	-3.16829	-0.93508	0.701013	1.69345	2.23321	0.119653	0.818997	0.199929	1.63671	1.75822	0.980973	1.43678	0.284071	0.999952
+pH fractionation/SP	Q02543	Q02543	AHSIQIMK	[R].AHSIQIMK.[V]		0.000246334	1	33	-2.30502	0.490882	0.948593	2.16759	2.7959	0.128875	0.818997	0.379204	1.58998	2.85426	0.545833	1.21078	0.510434	0.999952
+pH fractionation/SP	Q02543	Q02543	AHSIQIMKVEEIAASK	[R].AHSIQIMKVEEIAASK.[C]		0	1	5	-1.31283	-1.87528		1.56915	-0.562457		NA	-4.25777						NA
+pH fractionation/SP	Q5VSL9	Q5VSL9-2; Q5VSL9	AHSNPDFLPVDNCLQSVLGQR	[R].AHSNPDFLPVDNCLQSVLGQR.[V]	1xCarbamidomethyl [C13]	0	1	4	3.74909	2.76439	0.433052	1.05567	-0.984698	0.209299	0.818997	1.45661	2.61511	1.94223	0.30134	1.1585	0.484458	0.999952
+pH fractionation/SP	Q96EE3-1	Q96EE3; Q96EE3-1	AHSPMIAVGSDDSSPNAMAK	[R].AHSPMIAVGSDDSSPNAMAK.[V]		0	1	5	3.36409	2.10675	0.472012	1.58598	-1.25734	0.258497	0.818997	0.0707392	1.26419	3.64693	0.541076	1.19345	0.586315	0.999952
+pH fractionation/SP	P00558	P00558-2; P00558	AHSSMVGVNLPQK	[R].AHSSMVGVNLPQK.[A]	1xOxidation [M5]	0	1	54	-1.52413	-1.22546	0.621684	0.337645	0.298665	0.589809	0.881042	-1.79462	-2.18832	0.968638	0.366482	-0.393701	0.644661	0.999952
+pH fractionation/SP	P00558	P00558-2; P00558	AHSSMVGVNLPQK	[R].AHSSMVGVNLPQK.[A]		0	1	78	-0.0513148	0.0403961	0.658117	2.1031	0.0917108	0.945996	0.984744	1.34321	0.0641085	0.734464	4.28695	-1.27911	0.717657	0.999952
+pH fractionation/SP	P61201-2	P61201; P61201-2	AHTDFFEAFK	[K].AHTDFFEAFK.[N]		4.19381e-05	1	19	-0.151091	-0.371755	3.18448	4.14023	-0.220664	0.945181	0.984461	-2.24696	-0.920344		0.137834	1.32662		NA
+pH fractionation/SP	Q9BQ52	Q9BQ52-4; Q9BQ52-3; Q9BQ52	AHTEEPQAK	[R].AHTEEPQAK.[K]		0.000177325	1	5	2.05931	6.78421	0.893391		4.7249		NA	-0.617061	-2.09192	3.28366	0.818903	-1.47486	0.600487	0.999952
+pH fractionation/SP	Q00610	Q00610; Q00610-2	AHTMTDDVTFWK	[K].AHTMTDDVTFWK.[W]	1xOxidation [M4]	4.19381e-05	1	2	-0.160697	0.36901	0.445146	0.365411	0.529707	0.26124	0.818997	0.426753	-1.46206		1.07893	-1.88881		NA
+pH fractionation/SP	Q00610	Q00610; Q00610-2	AHTMTDDVTFWK	[K].AHTMTDDVTFWK.[W]		0	1	37	-0.694623	-0.271586	0.59308	0.747786	0.423037	0.48547	0.854843	-0.304173	0.804944	1.17256	0.836822	1.10912	0.253222	0.999952
+pH fractionation/SP	Q9Y6Y8	Q9Y6Y8-2; Q9Y6Y8	AHTSSTQLQEELEK	[R].AHTSSTQLQEELEK.[V]		3.35083e-05	1	4	0.581884	-1.90083	0.358566	0.0125705	-2.48271	0.00264272	0.513374	-0.223335						NA
+pH fractionation/SP	Q6ZUT1-2	Q6ZUT1-2; Q6ZUT1; Q6ZUT1-3	AHTSVANNEIQER	[K].AHTSVANNEIQER.[T]		0.000169063	1	2	1.12773	-0.313808	1.54253	1.58892	-1.44154	0.385473	0.831494	-1.16173	-0.248546	1.99521	0.328663	0.913183	0.585004	0.999952
+pH fractionation/SP	A6NHR9	A6NHR9-2; A6NHR9	AHVEGDGVVEGIIR	[K].AHVEGDGVVEGIIR.[Y]		0	1	11	2.47006	3.13231	0.716766	0.552579	0.662244	0.273775	0.818997	3.38441	4.10283	0.849104	0.571015	0.718423	0.290812	0.999952
+pH fractionation/SP	O60216	O60216	AHVFECNLESSVESIISPK	[K].AHVFECNLESSVESIISPK.[V]	1xCarbamidomethyl [C6]	0	1	3	-0.364372	-1.14025	0.206027	2.54475	-0.775879	0.709231	0.912094	-1.57658	0.104974	1.8779	0.380519	1.68155	0.319902	0.999952
+pH fractionation/SP	P55072	P55072	AHVIVMAATNRPNSIDPALR	[R].AHVIVMAATNRPNSIDPALR.[R]		4.19381e-05	1	6	-2.08569	-0.569731	0.597011	1.81231	1.51596	0.240814	0.818997	0.348429	1.37258	1.54394		1.02415		NA
+pH fractionation/SP	P55072	P55072	AHVIVMAATNRPNSIDPALRR	[R].AHVIVMAATNRPNSIDPALRR.[F]		3.35083e-05	1	3	1.10958	-0.691015	0.425742	0.97313	-1.80059	0.0583405	0.818997	-0.985932	-1.2579	1.07432	0.0687215	-0.271966	0.665087	0.999952
+pH fractionation/SP	Q9BTE3	Q9BTE3; Q9BTE3-2	AHVLHFGK	[K].AHVLHFGK.[Y]		0.000950814	1	2	0.504969	-0.874026	0.558898	0.924282	-1.379	0.0914922	0.818997	-2.06556	-1.21819	1.67005	0.097947	0.847362	0.42985	0.999952
+pH fractionation/SP	Q86UP2	Q86UP2-4; Q86UP2-3; Q86UP2-2; Q86UP2	AHVQEVAQHNLK	[K].AHVQEVAQHNLK.[E]		0	1	7	-0.986966	-1.12116	0.456211	0.954177	-0.134191	0.839245	0.95385	-1.64312	-3.10554		1.0182	-1.46241		NA
+pH fractionation/SP	O95478	O95478	AHVTHPELK	[K].AHVTHPELK.[A]		4.19381e-05	1	4	-3.02583	-3.29467		3.56842	-0.268842		NA	-4.02695	-3.12784	0.454227	2.00019	0.899114	0.476217	0.999952
+pH fractionation/SP	P21333	P21333; P21333-2	AHVVPCFDASK	[K].AHVVPCFDASK.[V]	1xCarbamidomethyl [C6]	4.19381e-05	1	40	-0.468366	-0.413298	0.102322	1.44983	0.0550678	0.950826	0.985794	-2.0238	-1.32859	2.51229	0.254385	0.695207	0.734561	0.999952
+pH fractionation/SP	P49848-3	P49848-3; P49848; P49848-2	AHWLSIEGCQPAIPENPPPAPK	[K].AHWLSIEGCQPAIPENPPPAPK.[E]	1xCarbamidomethyl [C9]	0	1	1		1.85415					NA	1.50126	1.91127	0.81985	1.1809	0.410007	0.703968	0.999952
+pH fractionation/SP	P27708	P27708	AHWTPFEGQK	[K].AHWTPFEGQK.[V]		0.00030511	1	7	-0.571826	-0.916141	0.504751	1.13439	-0.344314	0.656088	0.899252	-1.45502	-2.11458	1.3722	0.28307	-0.659558	0.460635	0.999952
+pH fractionation/SP	Q7Z3B3	Q7Z3B3	AIAAEDPSLDFR	[K].AIAAEDPSLDFR.[N]		6.09156e-05	1	2		-2.13144		3.72337			NA	-1.75866	-0.161818	3.37309	0.495611	1.59684	0.572414	0.999952
+pH fractionation/SP	P33992	P33992	AIACLLFGGSR	[K].AIACLLFGGSR.[K]	1xCarbamidomethyl [C4]	4.19381e-05	1	7	0.737494	0.00459732	1.20532	2.5407	-0.732897	0.675086	0.904136	-0.0360521	-0.883457	1.75266	1.07822	-0.847405	0.515081	0.999952
+pH fractionation/SP	Q96GA3	Q96GA3	AIADHLFWSEETK	[R].AIADHLFWSEETK.[S]		0	1	4	-0.630082	-1.22796	0.0406788		-0.597875		NA	-5.4313	-4.04101	1.37268	1.01769	1.39029	0.368888	0.999952
+pH fractionation/SP	Q9Y490	Q9Y490	AIADMLR	[R].AIADMLR.[A]		0.00311592	1	13	-1.12702	-0.0480712	0.657813	1.54861	1.07895	0.328962	0.822072	-1.85456	-2.28222	0.760529	0.453578	-0.427657	0.565113	0.999952
+pH fractionation/SP	P50990	P50990; P50990-3; P50990-2	AIADTGANVVVTGGK	[K].AIADTGANVVVTGGK.[V]		0	1	41	1.26144	0.993067	0.23391	0.39393	-0.268368	0.367682	0.829318	0.566425	0.138137	1.09323	0.554483	-0.428287	0.577723	0.999952
+pH fractionation/SP	Q32P44	Q32P44; Q32P44-2	AIAEGLGSELLVGTTK	[R].AIAEGLGSELLVGTTK.[N]		4.19381e-05	1	2	0.9918	-0.717774	0.501923	1.7418	-1.70957	0.183073	0.818997	-0.514332	-1.14976	1.33026	0.335061	-0.635423	0.579698	0.999952
+pH fractionation/SP	P06576	P06576	AIAELGIYPAVDPLDSTSR	[R].AIAELGIYPAVDPLDSTSR.[I]		0	1	32	3.521	1.71932	0.800119	3.12898	-1.80169	0.388643	0.832248	0.45237	-0.117462	2.2392	0.713257	-0.569832	0.696077	0.999952
+pH fractionation/SP	P22102	P22102-2; P22102	AIAFLQQPR	[R].AIAFLQQPR.[-S]		8.08306e-05	1	29	3.17532	2.9229	0.564225	0.75548	-0.252423	0.692397	0.908117	1.48236	2.54645	1.28381	0.0273873	1.06408	0.347271	0.999952
+pH fractionation/SP	P53041	E7EU14; P53041	AIAGDEHK	[R].AIAGDEHK.[R]		0.00766079	1	3	-2.42862	-1.29489	0.388382	3.58172	1.13373	0.594537	0.881847	0.860422	-1.77539	0.462411	0.55332	-2.63582	0.0118164	0.999952
+pH fractionation/SP	P53041	E7EU14; P53041	AIAGDEHKR	[R].AIAGDEHKR.[S]		4.19381e-05	1	9	1.9968	-0.0207884	0.976083	2.9307	-2.01758	0.322469	0.820259	-0.710118	-1.36138	1.77172	1.3196	-0.651259	0.692077	0.999952
+pH fractionation/SP	Q96M27	Q96M27	AIAGMYK	[R].AIAGMYK.[Q]		0.00288581	1	6	-1.21933	-0.908424	0.270651	0.900284	0.31091	0.686002	0.90622	-2.07797	-2.11665			-0.0386853		NA
+pH fractionation/SP	O95861	O95861-3; O95861; O95861-2; O95861-4	AIAGVINQPYYNYEAGPDAVLGR	[K].AIAGVINQPYYNYEAGPDAVLGR.[T]		0	1	5	-1.38901	-0.364042	0.437006	2.00659	1.02497	0.436088	0.841644	-1.34053	-2.05785	2.86918		-0.71732		NA
+pH fractionation/SP	O75037	O75037-2; O75037-3; O75037-4; O75037	AIAHLFGGIAER	[R].AIAHLFGGIAER.[K]		9.74898e-05	1	1	-3.28744	-1.23069	0.141034	0.502158	2.05676	0.0306834	0.791941		-3.9487					NA
+pH fractionation/SP	Q96PP8	Q9H0R5-4; Q96PP8; Q9H0R5; Q96PP8-2	AIAHYDQQMGQK	[K].AIAHYDQQMGQK.[V]		4.19381e-05	1	2		-1.30373					NA		-2.64046		1.70748			NA
+pH fractionation/SP	P32456; P32455	P32456; P32455	AIAHYEQQMGQK	[K].AIAHYEQQMGQK.[V]		0	2	20	-2.61976	0.822365			3.44213		NA	-0.023972	-0.0622843		1.13301	-0.0383123		NA
+pH fractionation/SP	P32456; P32455	P32456; P32455	AIAHYEQQMGQK	[K].AIAHYEQQMGQK.[V]	1xOxidation [M9]	0.00124955	2	2	-2.24404	-2.12514		2.58884	0.118899		NA	-2.04374	-0.255781	1.59243	0.174506	1.78796	0.12594	0.999952
+pH fractionation/SP	P54920	Q9H115-3; P54920; Q9H115-2; Q9H115	AIAHYEQSADYYK	[K].AIAHYEQSADYYK.[G]		4.19381e-05	1	7	-0.0524433	-0.711264	1.00424	0.571655	-0.658821	0.379297	0.831052	-2.43851	-3.03166	3.25118	1.65967	-0.593144	0.792329	0.999952
+pH fractionation/SP	Q92615	Q92615	AIAINTFLPK	[K].AIAINTFLPK.[N]		0.00623633	1	1	1.22781	0.903807	1.07165	0.557807	-0.324005	0.666437	0.901775	0.10659	0.104802	0.74043	0.984267	-0.00178796	0.998114	0.999952
+pH fractionation/SP	P55072	P55072	AIANECQANFISIK	[K].AIANECQANFISIK.[G]	1xCarbamidomethyl [C6]	0	1	12	-0.607108	-0.24899	1.12217	0.585805	0.358118	0.649793	0.897365	0.45255	-1.15789	0.978381	0.29136	-1.61044	0.0523126	0.999952
+pH fractionation/SP	Q9BZJ0	Q9BZJ0-2; Q9BZJ0; Q9BZJ0-3	AIANVPPIQEK	[R].AIANVPPIQEK.[R]		0.000420983	1	5	0.644767	0.624596	0.0856783	2.57114	-0.0201713	0.989815	0.997078	1.18114	-0.829535		1.25004	-2.01068		NA
+pH fractionation/SP	P08473	P08473	AIAQLNSK	[K].AIAQLNSK.[Y]		0.00644999	1	2	1.23374	1.89116	0.266389	0.702412	0.657422	0.204162	0.818997	1.89176	2.53305	0.825177	1.1702	0.641291	0.481221	0.999952
+pH fractionation/SP	Q9NVR2	Q9NVR2	AIASLHHLAALQGSISQPQITGQGTLEHQR	[K].AIASLHHLAALQGSISQPQITGQGTLEHQR.[A]		0	1	1	-1.51778	-1.44753		1.03518	0.0702497		NA	-1.02084	-1.1324	0.609615	0.44786	-0.111565	0.841497	0.999952
[truncated: 69,792 more rows]

## Sheet: DIA peptide quant
Supplemental Table S5: Peptide quantification by DIA-MS
[truncated: 61,452 more rows]
