# Supplementary material for: Deep profiling and custom databases improve detection of proteoforms generated by alternative splicing
Source: HighWire-hosted journal article supplement (doi:10.1101/gr.248435.119), 2019-11-14
Supplement: Supplemental_Table_S6.xlsx [file Supplemental_Table_S6.xlsx]

## Sheet: significant FC cyto
Supplemental Table S6: List of proteins by sub-cellular compartment
Search files/database	SWISS-PROT Accession	Description	Ensembl ID	Gene Symbol	custom database Accession	CYTOPLASMIC FRACTIONS	log2 FC_cyto (S/U)	p.value (imputed MVs)	adjusted p.value
+pH fractionation/SP	Q08AF3	Schlafen family member 5 OS=Homo sapiens OX=9606 GN=SLFN5 PE=1 SV=1	ENSG00000166750	SLFN5			3.41691	1.32019e-07	0.000676333
+pH fractionation/SP	P51692	Signal transducer and activator of transcription 5B OS=Homo sapiens OX=9606 GN=STAT5B PE=1 SV=2	ENSG00000173757	STAT5B			1.84442	1.03563e-05	0.0144083
+pH fractionation/SP	P18858	DNA ligase 1 OS=Homo sapiens OX=9606 GN=LIG1 PE=1 SV=1	ENSG00000105486	LIG1			-1.56756	2.34481e-05	0.0144083
+pH fractionation/SP	Q86YS6	Ras-related protein Rab-43 OS=Homo sapiens OX=9606 GN=RAB43 PE=1 SV=1	ENSG00000172780	RAB43			2.18459	2.78555e-05	0.0144083
+pH fractionation/SP	O00750	Phosphatidylinositol 4-phosphate 3-kinase C2 domain-containing subunit beta OS=Homo sapiens OX=9606 GN=PIK3C2B PE=1 SV=2	ENSG00000133056	PIK3C2B			4.09378	2.81248e-05	0.0144083
-pH fractionation/SP	Q9NZD2	Glycolipid transfer protein OS=Homo sapiens OX=9606 GN=GLTP PE=1 SV=3	ENSG00000139433	GLTP			1.08965	2.93301e-05	0.0177628
+pH fractionation/SP	P01106-2	Isoform 2 of Myc proto-oncogene protein OS=Homo sapiens OX=9606 GN=MYC	ENSG00000136997	MYC			3.11991	4.46966e-05	0.0200072
+pH fractionation/SP	Q92597	Protein NDRG1 OS=Homo sapiens OX=9606 GN=NDRG1 PE=1 SV=1	ENSG00000104419	NDRG1			3.2348	4.68645e-05	0.0200072
-pH fractionation/MAJIQ		ENSG00000160072:s:1412654-1412730 OS=Homo sapiens GN=ENSG00000160072	ENSG00000160072	ATAD3B	ENSG00000160072:s:1412654-1412730_1412730-1414024_S2		-6.14378	5.33233e-05	0.00959852
+pH fractionation/SP	P23921	Ribonucleoside-diphosphate reductase large subunit OS=Homo sapiens OX=9606 GN=RRM1 PE=1 SV=1	ENSG00000167325	RRM1			-2.79698	5.7372e-05	0.0219357
+pH fractionation/RefSeq	O75153	clustered mitochondria homolog (CLUH), mRNA	ENSG00000132361	CLUH	NM_015229.3_2		-2.07621	5.8362e-05	0.0323421
-pH fractionation/SP	Q92619	Rho GTPase-activating protein 45 OS=Homo sapiens OX=9606 GN=ARHGAP45 PE=1 SV=2	ENSG00000180448	HMHA1; ARHGAP45			2.87589	5.89491e-05	0.0177628
+pH fractionation/SP	Q8WVY7	Ubiquitin-like domain-containing CTD phosphatase 1 OS=Homo sapiens OX=9606 GN=UBLCP1 PE=1 SV=2	ENSG00000164332	UBLCP1			1.10981	6.38323e-05	0.0219357
+pH fractionation/SP	O75153	Clustered mitochondria protein homolog OS=Homo sapiens OX=9606 GN=CLUH PE=1 SV=2	ENSG00000132361	CLUH; KIAA0664			-2.08165	6.92776e-05	0.0219357
+pH fractionation/SP	Q14114	Low-density lipoprotein receptor-related protein 8 OS=Homo sapiens OX=9606 GN=LRP8 PE=1 SV=4	ENSG00000157193	LRP8			-2.48544	7.00105e-05	0.0219357
-pH fractionation/SP	O00232-2	Isoform 2 of 26S proteasome non-ATPase regulatory subunit 12 OS=Homo sapiens OX=9606 GN=PSMD12	ENSG00000197170	PSMD12			1.75681	8.2161e-05	0.0177628
+pH fractionation/SP	O95571	Persulfide dioxygenase ETHE1, mitochondrial OS=Homo sapiens OX=9606 GN=ETHE1 PE=1 SV=2	ENSG00000105755	ETHE1			2.12263	8.3088e-05	0.0219357
+pH fractionation/SP	Q6PI26	Protein SHQ1 homolog OS=Homo sapiens OX=9606 GN=SHQ1 PE=1 SV=2	ENSG00000144736	SHQ1			-2.32211	8.56361e-05	0.0219357
+pH fractionation/SP	P40763	Signal transducer and activator of transcription 3 OS=Homo sapiens OX=9606 GN=STAT3 PE=1 SV=2	ENSG00000168610	STAT3			1.38268	0.000100772	0.0244523
-pH fractionation/SP	Q96GC9	Vacuole membrane protein 1 OS=Homo sapiens OX=9606 GN=VMP1 PE=1 SV=1	ENSG00000062716	VMP1			3.0191	0.00012114	0.0212865
+pH fractionation/SP	P02786	Transferrin receptor protein 1 OS=Homo sapiens OX=9606 GN=TFRC PE=1 SV=2	ENSG00000072274	TFRC			-1.3526	0.000124414	0.0262191
+pH fractionation/SP	Q2TAY7	WD40 repeat-containing protein SMU1 OS=Homo sapiens OX=9606 GN=SMU1 PE=1 SV=2	ENSG00000122692	SMU1			-2.33104	0.000140613	0.0262191
+pH fractionation/SP	Q9Y617	Phosphoserine aminotransferase OS=Homo sapiens OX=9606 GN=PSAT1 PE=1 SV=2	ENSG00000135069	PSAT1			-1.27657	0.000141753	0.0262191
-pH fractionation/SP	Q8WUH1-2	Isoform 2 of Protein Churchill OS=Homo sapiens OX=9606 GN=CHURC1	ENSG00000258289	CHURC1			3.93252	0.00014326	0.0212865
+pH fractionation/SP	Q6UN15-3	Isoform 3 of Pre-mRNA 3'-end-processing factor FIP1 OS=Homo sapiens OX=9606 GN=FIP1L1	ENSG00000145216	FIP1L1			-4.43511	0.000143302	0.0262191
+pH fractionation/SP	Q9BW19	Kinesin-like protein KIFC1 OS=Homo sapiens OX=9606 GN=KIFC1 PE=1 SV=2	ENSG00000237649	KIFC1			-2.0335	0.00018552	0.0278667
+pH fractionation/SP	P80217-2	Isoform 2 of Interferon-induced 35 kDa protein OS=Homo sapiens OX=9606 GN=IFI35	ENSG00000068079	IFI35			4.25752	0.000188006	0.0278667
+pH fractionation/SP	Q13094	Lymphocyte cytosolic protein 2 OS=Homo sapiens OX=9606 GN=LCP2 PE=1 SV=1	ENSG00000043462	LCP2			2.71254	0.000195559	0.0278667
+pH fractionation/SP	Q92930	Ras-related protein Rab-8B OS=Homo sapiens OX=9606 GN=RAB8B PE=1 SV=2	ENSG00000166128	RAB8B			1.16692	0.000201812	0.0278667
+pH fractionation/SP	Q86YV0	RAS protein activator like-3 OS=Homo sapiens OX=9606 GN=RASAL3 PE=1 SV=2	ENSG00000105122	RASAL3			2.67255	0.000204011	0.0278667
+pH fractionation/SP	Q86WV6	Stimulator of interferon genes protein OS=Homo sapiens OX=9606 GN=TMEM173 PE=1 SV=1	ENSG00000184584	TMEM173			4.86749	0.000204863	0.0278667
+pH fractionation/SP	Q15003	Condensin complex subunit 2 OS=Homo sapiens OX=9606 GN=NCAPH PE=1 SV=3	ENSG00000121152	NCAPH			-1.74272	0.00022042	0.0282523
+pH fractionation/SP	Q14005	Pro-interleukin-16 OS=Homo sapiens OX=9606 GN=IL16 PE=1 SV=4	ENSG00000172349	IL16			2.49469	0.000220592	0.0282523
+pH fractionation/SP	Q13085-4	Isoform 4 of Acetyl-CoA carboxylase 1 OS=Homo sapiens OX=9606 GN=ACACA	ENSG00000278540	ACACA			-1.24987	0.00023632	0.0295285
-pH fractionation/SP	Q71RG4	Transmembrane and ubiquitin-like domain-containing protein 2 OS=Homo sapiens OX=9606 GN=TMUB2 PE=1 SV=2	ENSG00000168591	TMUB2			2.1186	0.000242876	0.0259776
+pH fractionation/SP	P82909	28S ribosomal protein S36, mitochondrial OS=Homo sapiens OX=9606 GN=MRPS36 PE=1 SV=2	ENSG00000278461	MRPS36			2.09321	0.000260717	0.0318013
+pH fractionation/SP	P14618	Pyruvate kinase PKM OS=Homo sapiens OX=9606 GN=PKM PE=1 SV=4	ENSG00000067225	PKM			1.03957	0.000273084	0.0320945
+pH fractionation/SP	Q96BY6-3	Isoform 3 of Dedicator of cytokinesis protein 10 OS=Homo sapiens OX=9606 GN=DOCK10	ENSG00000135905	DOCK10			2.04358	0.000276526	0.0320945
-pH fractionation/SP	Q15004	PCNA-associated factor OS=Homo sapiens OX=9606 GN=PCLAF PE=1 SV=1	ENSG00000259316	KIAA0101; PCLAF			-3.41448	0.000311985	0.0264531
+pH fractionation/SP	Q9NYF8-3	Isoform 3 of Bcl-2-associated transcription factor 1 OS=Homo sapiens OX=9606 GN=BCLAF1	ENSG00000029363	BCLAF1			-1.12879	0.000333487	0.0354238
+pH fractionation/SP	Q9UI08-2	Isoform 1 of Ena/VASP-like protein OS=Homo sapiens OX=9606 GN=EVL	ENSG00000196405	EVL			4.01351	0.000345625	0.0354238
+pH fractionation/RefSeq	P35609	actinin alpha 2 (ACTN2), transcript variant 1, mRNA	ENSG00000077522	ACTN2	NM_001103.3_1		1.26892	0.00036367	0.0446053
+pH fractionation/SP	O75352	Mannose-P-dolichol utilization defect 1 protein OS=Homo sapiens OX=9606 GN=MPDU1 PE=1 SV=2	ENSG00000129255	MPDU1			1.72527	0.000365636	0.0354238
+pH fractionation/SP	Q96AA3	Protein RFT1 homolog OS=Homo sapiens OX=9606 GN=RFT1 PE=1 SV=1	ENSG00000163933	RFT1			-1.25977	0.000369969	0.0354238
+pH fractionation/SP	Q9BTE3	Mini-chromosome maintenance complex-binding protein OS=Homo sapiens OX=9606 GN=MCMBP PE=1 SV=2	ENSG00000197771	MCMBP			-2.21863	0.000379884	0.0354238
+pH fractionation/SP	Q08881	Tyrosine-protein kinase ITK/TSK OS=Homo sapiens OX=9606 GN=ITK PE=1 SV=1	ENSG00000113263	ITK			3.33992	0.000380885	0.0354238
+pH fractionation/SP	O15304	Apoptosis regulatory protein Siva OS=Homo sapiens OX=9606 GN=SIVA1 PE=1 SV=2	ENSG00000184990	SIVA1			-2.78791	0.000389271	0.0354238
+pH fractionation/SP	Q04759	Protein kinase C theta type OS=Homo sapiens OX=9606 GN=PRKCQ PE=1 SV=3	ENSG00000065675	PRKCQ			-2.93652	0.000394136	0.0354238
+pH fractionation/SP	Q13464	Rho-associated protein kinase 1 OS=Homo sapiens OX=9606 GN=ROCK1 PE=1 SV=1	ENSG00000067900	ROCK1			1.13227	0.00041551	0.0361662
+pH fractionation/SP	P14550	Alcohol dehydrogenase [NADP(+)] OS=Homo sapiens OX=9606 GN=AKR1A1 PE=1 SV=3	ENSG00000117448	AKR1A1			1.31284	0.000416515	0.0361662
-pH fractionation/RefSeq		Homo sapiens small nucleolar RNA, C/D box 22 (SNORD22), small nucleolar RNA		SNORD22	NR_000008.2_1		4.23668	0.000423847	0.0268466
+pH fractionation/SP	Q96CM8-2	Isoform 2 of Acyl-CoA synthetase family member 2, mitochondrial OS=Homo sapiens OX=9606 GN=ACSF2	ENSG00000167107	ACSF2			1.63409	0.000424415	0.036238
+pH fractionation/SP	P06493	Cyclin-dependent kinase 1 OS=Homo sapiens OX=9606 GN=CDK1 PE=1 SV=3	ENSG00000170312	CDK1			-1.08705	0.000445366	0.0368214
+pH fractionation/SP	Q8TDZ2-4	Isoform 4 of [F-actin]-monooxygenase MICAL1 OS=Homo sapiens OX=9606 GN=MICAL1	ENSG00000135596	MICAL1			1.38177	0.000453159	0.0368497
+pH fractionation/SP	Q7Z406-2	Isoform 2 of Myosin-14 OS=Homo sapiens OX=9606 GN=MYH14	ENSG00000105357	MYH14			2.26337	0.000464314	0.0371669
+pH fractionation/SP	P49366	Deoxyhypusine synthase OS=Homo sapiens OX=9606 GN=DHPS PE=1 SV=1	ENSG00000095059	DHPS			-1.05259	0.00050803	0.0398219
+pH fractionation/SP	Q9BW71	HIRA-interacting protein 3 OS=Homo sapiens OX=9606 GN=HIRIP3 PE=1 SV=3	ENSG00000149929	HIRIP3			-1.82221	0.000513029	0.0398219
+pH fractionation/MAJIQ			ENSG00000034063	ENSG00000034063	ENSG00000034063:t:4910566-4911285_4909667-4910888_S2		-2.5454	0.000520714	0.117504
+pH fractionation/SP	Q9UKF6	Cleavage and polyadenylation specificity factor subunit 3 OS=Homo sapiens OX=9606 GN=CPSF3 PE=1 SV=1	ENSG00000119203	CPSF3			-2.58101	0.000523193	0.0399295
-pH fractionation/SP	P0DOX7	Immunoglobulin kappa light chain OS=Homo sapiens OX=9606 PE=1 SV=1					1.85745	0.00052578	0.0300845
+pH fractionation/SP	Q9Y276	Mitochondrial chaperone BCS1 OS=Homo sapiens OX=9606 GN=BCS1L PE=1 SV=1	ENSG00000074582	BCS1L			-6.41255	0.000530003	0.0399295
+pH fractionation/SP	Q92542	Nicastrin OS=Homo sapiens OX=9606 GN=NCSTN PE=1 SV=2	ENSG00000162736	NCSTN			1.11855	0.000551991	0.0401348
+pH fractionation/SP	P12814	Alpha-actinin-1 OS=Homo sapiens OX=9606 GN=ACTN1 PE=1 SV=2	ENSG00000072110	ACTN1			1.38109	0.000566932	0.0401348
+pH fractionation/SP	P07858	Cathepsin B OS=Homo sapiens OX=9606 GN=CTSB PE=1 SV=3	ENSG00000164733	CTSB			1.69866	0.000567945	0.0401348
+pH fractionation/SP	P26358-2	Isoform 2 of DNA (cytosine-5)-methyltransferase 1 OS=Homo sapiens OX=9606 GN=DNMT1	ENSG00000130816	DNMT1			-1.67128	0.000568109	0.0401348
+pH fractionation/SP	Q07108	Early activation antigen CD69 OS=Homo sapiens OX=9606 GN=CD69 PE=1 SV=1	ENSG00000110848	CD69			6.69074	0.000571899	0.0401348
+pH fractionation/SP	O75717	WD repeat and HMG-box DNA-binding protein 1 OS=Homo sapiens OX=9606 GN=WDHD1 PE=1 SV=1	ENSG00000198554	WDHD1			-1.16852	0.000581212	0.0402371
+pH fractionation/RefSeq	P29323	EPH receptor B2 (EPHB2), transcript variant 4, mRNA	ENSG00000133216	EPHB2	NM_001309193.1_1		2.2394	0.000593544	0.0464547
+pH fractionation/SP	Q16222	UDP-N-acetylhexosamine pyrophosphorylase OS=Homo sapiens OX=9606 GN=UAP1 PE=1 SV=3	ENSG00000117143	UAP1			-1.33957	0.000601691	0.0410995
+pH fractionation/SP	P31350-2	Isoform 2 of Ribonucleoside-diphosphate reductase subunit M2 OS=Homo sapiens OX=9606 GN=RRM2	ENSG00000171848	RRM2			-2.49925	0.00061284	0.0413103
+pH fractionation/SP	P10747-7	Isoform 7 of T-cell-specific surface glycoprotein CD28 OS=Homo sapiens OX=9606 GN=CD28	ENSG00000178562	CD28			3.37701	0.000625825	0.0416377
+pH fractionation/SP	Q7L5N7	Lysophosphatidylcholine acyltransferase 2 OS=Homo sapiens OX=9606 GN=LPCAT2 PE=1 SV=1	ENSG00000087253	LPCAT2			2.98932	0.000662666	0.041953
+pH fractionation/SP	O43379-4	Isoform 4 of WD repeat-containing protein 62 OS=Homo sapiens OX=9606 GN=WDR62	ENSG00000075702	WDR62			-3.46848	0.000663604	0.041953
+pH fractionation/SP	P11169	Solute carrier family 2, facilitated glucose transporter member 3 OS=Homo sapiens OX=9606 GN=SLC2A3 PE=1 SV=1	ENSG00000059804	SLC2A3			2.81182	0.000669104	0.041953
+pH fractionation/SP	Q14693-7	Isoform 7 of Phosphatidate phosphatase LPIN1 OS=Homo sapiens OX=9606 GN=LPIN1	ENSG00000134324	LPIN1			1.4716	0.000679374	0.041953
+pH fractionation/SP	P23743	Diacylglycerol kinase alpha OS=Homo sapiens OX=9606 GN=DGKA PE=1 SV=3	ENSG00000065357	DGKA			1.93493	0.0006797	0.041953
+pH fractionation/SP	Q9NVI1	Fanconi anemia group I protein OS=Homo sapiens OX=9606 GN=FANCI PE=1 SV=4	ENSG00000140525	FANCI			-1.36255	0.000692983	0.0421365
+pH fractionation/SP	Q96HC4-6	Isoform 6 of PDZ and LIM domain protein 5 OS=Homo sapiens OX=9606 GN=PDLIM5	ENSG00000163110	PDLIM5			1.90794	0.000699122	0.0421365
+pH fractionation/RefSeq	Q9HDC5	junctophilin 1 (JPH1), transcript variant 1, mRNA	ENSG00000104369	JPH1	NM_020647.3_2		-2.87185	0.000784718	0.0515581
+pH fractionation/SP	O43561-3	Isoform 3 of Linker for activation of T-cells family member 1 OS=Homo sapiens OX=9606 GN=LAT	ENSG00000213658	LAT			4.93175	0.000823479	0.049043
-pH fractionation/SP	Q6PH81	UPF0547 protein C16orf87 OS=Homo sapiens OX=9606 GN=C16orf87 PE=1 SV=1	ENSG00000155330	C16orf87			1.9865	0.000831228	0.0312487
+pH fractionation/SP	Q8NC42	E3 ubiquitin-protein ligase RNF149 OS=Homo sapiens OX=9606 GN=RNF149 PE=2 SV=2	ENSG00000163162	RNF149			-2.3613	0.000926806	0.0539549
-pH fractionation/SP	O94782	Ubiquitin carboxyl-terminal hydrolase 1 OS=Homo sapiens OX=9606 GN=USP1 PE=1 SV=1	ENSG00000162607	USP1			-2.19764	0.00093435	0.031454
+pH fractionation/SP	P49754	Vacuolar protein sorting-associated protein 41 homolog OS=Homo sapiens OX=9606 GN=VPS41 PE=1 SV=3	ENSG00000006715	VPS41			1.87738	0.000953951	0.0547855
+pH fractionation/SP	Q15042-3	Isoform 2 of Rab3 GTPase-activating protein catalytic subunit OS=Homo sapiens OX=9606 GN=RAB3GAP1	ENSG00000115839	RAB3GAP1			1.00805	0.000962462	0.0547855
+pH fractionation/SP	O14893	Gem-associated protein 2 OS=Homo sapiens OX=9606 GN=GEMIN2 PE=1 SV=1	ENSG00000092208	GEMIN2			-1.48304	0.000977827	0.0550484
+pH fractionation/SP	Q01085	Nucleolysin TIAR OS=Homo sapiens OX=9606 GN=TIAL1 PE=1 SV=1	ENSG00000151923	TIAL1			-1.26349	0.0009958	0.0554509
+pH fractionation/SP	P30825	High affinity cationic amino acid transporter 1 OS=Homo sapiens OX=9606 GN=SLC7A1 PE=1 SV=1	ENSG00000139514	SLC7A1			-1.82619	0.00100923	0.0555947
-pH fractionation/SP	Q8TAP6	Centrosomal protein of 76 kDa OS=Homo sapiens OX=9606 GN=CEP76 PE=1 SV=1	ENSG00000101624	CEP76			-3.28303	0.00100973	0.031992
+pH fractionation/SP	Q15054	DNA polymerase delta subunit 3 OS=Homo sapiens OX=9606 GN=POLD3 PE=1 SV=2	ENSG00000077514	POLD3			-2.79035	0.00102992	0.0557087
+pH fractionation/SP	O75995	SAM and SH3 domain-containing protein 3 OS=Homo sapiens OX=9606 GN=SASH3 PE=1 SV=2	ENSG00000122122	SASH3			1.5079	0.00105535	0.0557087
+pH fractionation/SP	Q2M2I8	AP2-associated protein kinase 1 OS=Homo sapiens OX=9606 GN=AAK1 PE=1 SV=3	ENSG00000115977	AAK1			2.37043	0.00106567	0.0557087
-pH fractionation/SP	Q14847-2	Isoform 2 of LIM and SH3 domain protein 1 OS=Homo sapiens OX=9606 GN=LASP1		LASP1			1.68142	0.00108205	0.0323001
-pH fractionation/SP	O00584	Ribonuclease T2 OS=Homo sapiens OX=9606 GN=RNASET2 PE=1 SV=2	ENSG00000026297	RNASET2			2.94696	0.00111764	0.0323001
+pH fractionation/SP	P20936	Ras GTPase-activating protein 1 OS=Homo sapiens OX=9606 GN=RASA1 PE=1 SV=1	ENSG00000145715	RASA1			2.54163	0.00118057	0.0580176
+pH fractionation/SP	O95870	Protein ABHD16A OS=Homo sapiens OX=9606 GN=ABHD16A PE=1 SV=3	ENSG00000204427	ABHD16A			1.0466	0.00119537	0.0580176
+pH fractionation/SP	Q6PIU2-2	Isoform 2 of Neutral cholesterol ester hydrolase 1 OS=Homo sapiens OX=9606 GN=NCEH1		NCEH1			1.26062	0.00119958	0.0580176
+pH fractionation/SP	O00767	Acyl-CoA desaturase OS=Homo sapiens OX=9606 GN=SCD PE=1 SV=2	ENSG00000099194	SCD			-2.39768	0.00120051	0.0580176
+pH fractionation/SP	Q86UX7	Fermitin family homolog 3 OS=Homo sapiens OX=9606 GN=FERMT3 PE=1 SV=1	ENSG00000149781	FERMT3			1.30035	0.00121542	0.0580176
+pH fractionation/SP	Q15942	Zyxin OS=Homo sapiens OX=9606 GN=ZYX PE=1 SV=1	ENSG00000159840	ZYX			3.87872	0.00123572	0.0580176
+pH fractionation/SP	P49642	DNA primase small subunit OS=Homo sapiens OX=9606 GN=PRIM1 PE=1 SV=1	ENSG00000198056	PRIM1			-2.02548	0.00125044	0.0580176
-pH fractionation/SP	Q9UDT6	CAP-Gly domain-containing linker protein 2 OS=Homo sapiens OX=9606 GN=CLIP2 PE=1 SV=1	ENSG00000106665	CLIP2			1.64988	0.00125246	0.0323001
+pH fractionation/SP	P12268	Inosine-5'-monophosphate dehydrogenase 2 OS=Homo sapiens OX=9606 GN=IMPDH2 PE=1 SV=2	ENSG00000178035	IMPDH2			-1.58871	0.00126338	0.0580176
+pH fractionation/SP	P56282	DNA polymerase epsilon subunit 2 OS=Homo sapiens OX=9606 GN=POLE2 PE=1 SV=2	ENSG00000100479	POLE2			-2.37039	0.00126485	0.0580176
+pH fractionation/RefSeq	Q6ZN18	AE binding protein 2 (AEBP2), transcript variant 2, mRNA	ENSG00000139154	AEBP2	NM_001114176.1_2		-1.42325	0.00127284	0.059421
+pH fractionation/SP	A0A0B4J237	T cell receptor alpha variable 8-2 OS=Homo sapiens OX=9606 GN=TRAV8-2 PE=3 SV=1	ENSG00000211786	TRAV8-2			3.03233	0.00127392	0.0580176
+pH fractionation/SP	Q96C36	Pyrroline-5-carboxylate reductase 2 OS=Homo sapiens OX=9606 GN=PYCR2 PE=1 SV=1	ENSG00000143811	PYCR2			-1.19986	0.00128145	0.0580176
+pH fractionation/SP	P14621	Acylphosphatase-2 OS=Homo sapiens OX=9606 GN=ACYP2 PE=1 SV=2	ENSG00000170634	ACYP2			1.72111	0.00129634	0.0580176
+pH fractionation/SP	P19474	E3 ubiquitin-protein ligase TRIM21 OS=Homo sapiens OX=9606 GN=TRIM21 PE=1 SV=1	ENSG00000132109	TRIM21			1.41167	0.00130121	0.0580176
-pH fractionation/SP	O75956	Cyclin-dependent kinase 2-associated protein 2 OS=Homo sapiens OX=9606 GN=CDK2AP2 PE=1 SV=1	ENSG00000167797	CDK2AP2			3.70612	0.00130976	0.0323001
+pH fractionation/SP	Q9BZX2	Uridine-cytidine kinase 2 OS=Homo sapiens OX=9606 GN=UCK2 PE=1 SV=1	ENSG00000143179	UCK2			-2.2518	0.00136783	0.0596012
-pH fractionation/SP	Q6ZVX7	F-box only protein 50 OS=Homo sapiens OX=9606 GN=NCCRP1 PE=1 SV=1	ENSG00000188505	NCCRP1			2.62487	0.00137149	0.0323001
+pH fractionation/SP	O95865	N(G),N(G)-dimethylarginine dimethylaminohydrolase 2 OS=Homo sapiens OX=9606 GN=DDAH2 PE=1 SV=1	ENSG00000233076	DDAH2			2.01949	0.0013753	0.0596012
+pH fractionation/SP	Q12834	Cell division cycle protein 20 homolog OS=Homo sapiens OX=9606 GN=CDC20 PE=1 SV=2	ENSG00000117399	CDC20			-2.53373	0.00138445	0.0596012
-pH fractionation/SP	O75264	Small integral membrane protein 24 OS=Homo sapiens OX=9606 GN=SMIM24 PE=2 SV=2	ENSG00000095932	C19orf77; SMIM24			2.66867	0.00139346	0.0323001
-pH fractionation/SP	Q92851-4	Isoform D of Caspase-10 OS=Homo sapiens OX=9606 GN=CASP10	ENSG00000003400	CASP10			2.9957	0.0014113	0.0323001
+pH fractionation/RefSeq	Q66K64	DDB1 and CUL4 associated factor 15 (DCAF15), mRNA	ENSG00000132017	DCAF15	NM_138353.3_3		-1.40146	0.00142364	0.0607763
+pH fractionation/SP	P50579	Methionine aminopeptidase 2 OS=Homo sapiens OX=9606 GN=METAP2 PE=1 SV=1	ENSG00000111142	METAP2			-2.12596	0.0014275	0.0602391
+pH fractionation/SP	Q9UBW5	Bridging integrator 2 OS=Homo sapiens OX=9606 GN=BIN2 PE=1 SV=3		BIN2			2.38602	0.00143332	0.0602391
+pH fractionation/SP	P22087	rRNA 2'-O-methyltransferase fibrillarin OS=Homo sapiens OX=9606 GN=FBL PE=1 SV=2	ENSG00000280548	FBL			-1.43304	0.0014463	0.0602391
-pH fractionation/SP	P56377	AP-1 complex subunit sigma-2 OS=Homo sapiens OX=9606 GN=AP1S2 PE=1 SV=1	ENSG00000182287	AP1S2			3.2169	0.00145422	0.0323001
+pH fractionation/SP	P23469	Receptor-type tyrosine-protein phosphatase epsilon OS=Homo sapiens OX=9606 GN=PTPRE PE=1 SV=1	ENSG00000132334	PTPRE			3.13929	0.00154093	0.0620755
+pH fractionation/SP	Q8WYJ6	Septin-1 OS=Homo sapiens OX=9606 GN=SEPT1 PE=1 SV=2		SEPT1			1.20068	0.00155187	0.0620755
+pH fractionation/SP	P04439	HLA class I histocompatibility antigen, A-3 alpha chain OS=Homo sapiens OX=9606 GN=HLA-A PE=1 SV=2	ENSG00000206503	HLA-A			2.10535	0.00156259	0.0620755
+pH fractionation/SP	Q15021	Condensin complex subunit 1 OS=Homo sapiens OX=9606 GN=NCAPD2 PE=1 SV=3	ENSG00000010292	NCAPD2			-1.32235	0.00156871	0.0620755
+pH fractionation/SP	Q14181	DNA polymerase alpha subunit B OS=Homo sapiens OX=9606 GN=POLA2 PE=1 SV=2	ENSG00000014138	POLA2			-1.9299	0.0015873	0.0620755
+pH fractionation/SP	Q86WV1	Src kinase-associated phosphoprotein 1 OS=Homo sapiens OX=9606 GN=SKAP1 PE=1 SV=3	ENSG00000141293	SKAP1			2.45251	0.00159841	0.0620755
+pH fractionation/SP	Q14137	Ribosome biogenesis protein BOP1 OS=Homo sapiens OX=9606 GN=BOP1 PE=1 SV=2	ENSG00000261236	BOP1			-1.32942	0.00159945	0.0620755
+pH fractionation/SP	Q04727-3	Isoform 3 of Transducin-like enhancer protein 4 OS=Homo sapiens OX=9606 GN=TLE4	ENSG00000106829	TLE4			1.62389	0.00165145	0.0624722
+pH fractionation/SP	P29965	CD40 ligand OS=Homo sapiens OX=9606 GN=CD40LG PE=1 SV=1	ENSG00000102245	CD40LG			4.38053	0.00165283	0.0624722
-pH fractionation/SP	Q9BZL4	Protein phosphatase 1 regulatory subunit 12C OS=Homo sapiens OX=9606 GN=PPP1R12C PE=1 SV=1	ENSG00000125503	PPP1R12C			2.50248	0.00165889	0.0341249
+pH fractionation/SP	P57075	Ubiquitin-associated and SH3 domain-containing protein A OS=Homo sapiens OX=9606 GN=UBASH3A PE=1 SV=1	ENSG00000160185	UBASH3A			1.15438	0.00167429	0.0626087
-pH fractionation/SP	Q13277	Syntaxin-3 OS=Homo sapiens OX=9606 GN=STX3 PE=1 SV=3	ENSG00000166900	STX3			1.06666	0.00169201	0.0341249
+pH fractionation/SP	Q9UI30	Multifunctional methyltransferase subunit TRM112-like protein OS=Homo sapiens OX=9606 GN=TRMT112 PE=1 SV=1	ENSG00000173113	TRMT112			-1.31283	0.00174204	0.0642047
+pH fractionation/SP	Q93050-3	Isoform 3 of V-type proton ATPase 116 kDa subunit a isoform 1 OS=Homo sapiens OX=9606 GN=ATP6V0A1	ENSG00000033627	ATP6V0A1			1.25092	0.00178856	0.0649845
+pH fractionation/SP	P14635	G2/mitotic-specific cyclin-B1 OS=Homo sapiens OX=9606 GN=CCNB1 PE=1 SV=1	ENSG00000134057	CCNB1			-2.12124	0.00185285	0.0668462
+pH fractionation/SP	Q96T88	E3 ubiquitin-protein ligase UHRF1 OS=Homo sapiens OX=9606 GN=UHRF1 PE=1 SV=1	ENSG00000276043	UHRF1			-2.02089	0.00193171	0.0686524
+pH fractionation/SP	P30464	HLA class I histocompatibility antigen, B-15 alpha chain OS=Homo sapiens OX=9606 GN=HLA-B PE=1 SV=2	ENSG00000232126	HLA-B			4.42298	0.00194312	0.0686524
+pH fractionation/SP	Q6UB35	Monofunctional C1-tetrahydrofolate synthase, mitochondrial OS=Homo sapiens OX=9606 GN=MTHFD1L PE=1 SV=1	ENSG00000120254	MTHFD1L			-1.23965	0.00196003	0.0687754
+pH fractionation/RefSeq	Q7Z4I7	LIM zinc finger domain containing 2 (LIMS2), transcript variant 1, mRNA	ENSG00000072163	LIMS2	NM_001136037.2_1		1.60562	0.00198248	0.0738868
+pH fractionation/SP	Q96PP8	Guanylate-binding protein 5 OS=Homo sapiens OX=9606 GN=GBP5 PE=1 SV=1	ENSG00000154451	GBP5			4.48354	0.00199257	0.0692341
+pH fractionation/SP	Q9Y248	DNA replication complex GINS protein PSF2 OS=Homo sapiens OX=9606 GN=GINS2 PE=1 SV=1	ENSG00000131153	GINS2			-2.16254	0.00201364	0.0692341
-pH fractionation/SP	Q16611	Bcl-2 homologous antagonist/killer OS=Homo sapiens OX=9606 GN=BAK1 PE=1 SV=1	ENSG00000030110	BAK1			2.3509	0.00204659	0.0348567
+pH fractionation/SP	P09326	CD48 antigen OS=Homo sapiens OX=9606 GN=CD48 PE=1 SV=2	ENSG00000117091	CD48			3.45316	0.00207867	0.0709934
+pH fractionation/SP	P53365	Arfaptin-2 OS=Homo sapiens OX=9606 GN=ARFIP2 PE=1 SV=1	ENSG00000132254	ARFIP2			-2.90202	0.0021453	0.072784
+pH fractionation/SP	Q96KB5-2	Isoform 2 of Lymphokine-activated killer T-cell-originated protein kinase OS=Homo sapiens OX=9606 GN=PBK	ENSG00000168078	PBK			-2.59722	0.00216517	0.0729748
-pH fractionation/SP	Q15742	NGFI-A-binding protein 2 OS=Homo sapiens OX=9606 GN=NAB2 PE=1 SV=1	ENSG00000166886	NAB2			2.41242	0.00218139	0.035988
+pH fractionation/SP	Q96G46	tRNA-dihydrouridine(47) synthase [NAD(P)(+)]-like OS=Homo sapiens OX=9606 GN=DUS3L PE=1 SV=2	ENSG00000141994	DUS3L			-2.41548	0.00222939	0.0740964
+pH fractionation/SP	P19838-2	Isoform 2 of Nuclear factor NF-kappa-B p105 subunit OS=Homo sapiens OX=9606 GN=NFKB1	ENSG00000109320	NFKB1			1.50025	0.00223902	0.0740964
+pH fractionation/SP	P21580	Tumor necrosis factor alpha-induced protein 3 OS=Homo sapiens OX=9606 GN=TNFAIP3 PE=1 SV=1	ENSG00000118503	TNFAIP3			2.83927	0.00224184	0.0740964
+pH fractionation/SP	Q8TEM1	Nuclear pore membrane glycoprotein 210 OS=Homo sapiens OX=9606 GN=NUP210 PE=1 SV=3	ENSG00000132182	NUP210			-1.34862	0.00231117	0.0749375
+pH fractionation/SP	P15428	15-hydroxyprostaglandin dehydrogenase [NAD(+)] OS=Homo sapiens OX=9606 GN=HPGD PE=1 SV=1	ENSG00000164120	HPGD			3.39299	0.00232978	0.0750657
-pH fractionation/SP	Q9BSJ8-2	Isoform 2 of Extended synaptotagmin-1 OS=Homo sapiens OX=9606 GN=ESYT1	ENSG00000139641	ESYT1			1.54586	0.00237609	0.0372704
+pH fractionation/SP	Q92882	Osteoclast-stimulating factor 1 OS=Homo sapiens OX=9606 GN=OSTF1 PE=1 SV=2	ENSG00000134996	OSTF1			-2.20598	0.00242268	0.0775711
-pH fractionation/SP	O15198	Mothers against decapentaplegic homolog 9 OS=Homo sapiens OX=9606 GN=SMAD9 PE=1 SV=1	ENSG00000120693	SMAD9			-1.11971	0.00243531	0.0372704
+pH fractionation/SP	Q8IYS1	Peptidase M20 domain-containing protein 2 OS=Homo sapiens OX=9606 GN=PM20D2 PE=1 SV=2	ENSG00000146281	PM20D2			-1.64276	0.00243917	0.0776142
-pH fractionation/SP	P12035	Keratin, type II cytoskeletal 3 OS=Homo sapiens OX=9606 GN=KRT3 PE=1 SV=3	ENSG00000186442	KRT3			2.99346	0.00246199	0.0372704
-pH fractionation/SP	P31025	Lipocalin-1 OS=Homo sapiens OX=9606 GN=LCN1 PE=1 SV=1	ENSG00000160349	LCN1			2.50936	0.00249401	0.0372704
-pH fractionation/SP	Q86U42	Polyadenylate-binding protein 2 OS=Homo sapiens OX=9606 GN=PABPN1 PE=1 SV=3	ENSG00000100836	PABPN1			1.08261	0.00252326	0.0372704
-pH fractionation/SP	Q8TBA6	Golgin subfamily A member 5 OS=Homo sapiens OX=9606 GN=GOLGA5 PE=1 SV=3	ENSG00000066455	GOLGA5			2.08721	0.00254681	0.0372704
+pH fractionation/SP	P55061-2	Isoform 2 of Bax inhibitor 1 OS=Homo sapiens OX=9606 GN=TMBIM6	ENSG00000139644	TMBIM6			2.24098	0.00256287	0.0785637
+pH fractionation/SP	Q9BR76	Coronin-1B OS=Homo sapiens OX=9606 GN=CORO1B PE=1 SV=1	ENSG00000172725	CORO1B			1.51064	0.00260004	0.0785637
+pH fractionation/SP	Q9BT23	LIM domain-containing protein 2 OS=Homo sapiens OX=9606 GN=LIMD2 PE=1 SV=1	ENSG00000136490	LIMD2			3.18514	0.00260698	0.0785637
+pH fractionation/SP	Q96BR5	Cytochrome c oxidase assembly factor 7 OS=Homo sapiens OX=9606 GN=COA7 PE=1 SV=2	ENSG00000162377	SELRC1; COA7			-2.05916	0.00260971	0.0785637
-pH fractionation/SP	Q6ZSR9	Uncharacterized protein FLJ45252 OS=Homo sapiens OX=9606 PE=2 SV=2					2.66393	0.00262285	0.0375477
+pH fractionation/SP	P23588	Eukaryotic translation initiation factor 4B OS=Homo sapiens OX=9606 GN=EIF4B PE=1 SV=2	ENSG00000063046	EIF4B			-1.04313	0.00264571	0.0785637
+pH fractionation/SP	Q15027	Arf-GAP with coiled-coil, ANK repeat and PH domain-containing protein 1 OS=Homo sapiens OX=9606 GN=ACAP1 PE=1 SV=1	ENSG00000072818	ACAP1			1.04445	0.00264644	0.0785637
+pH fractionation/SP	P11117	Lysosomal acid phosphatase OS=Homo sapiens OX=9606 GN=ACP2 PE=1 SV=3	ENSG00000134575	ACP2			2.13338	0.00266837	0.0785637
+pH fractionation/SP	O95466-2	Isoform 2 of Formin-like protein 1 OS=Homo sapiens OX=9606 GN=FMNL1		FMNL1			1.20457	0.00270302	0.0791084
+pH fractionation/SP	Q15758	Neutral amino acid transporter B(0) OS=Homo sapiens OX=9606 GN=SLC1A5 PE=1 SV=2	ENSG00000105281	SLC1A5			-1.73376	0.00272467	0.0791084
+pH fractionation/SP	P15153	Ras-related C3 botulinum toxin substrate 2 OS=Homo sapiens OX=9606 GN=RAC2 PE=1 SV=1	ENSG00000128340	RAC2			1.21297	0.00276215	0.0791084
+pH fractionation/SP	Q9UEE9	Craniofacial development protein 1 OS=Homo sapiens OX=9606 GN=CFDP1 PE=1 SV=1	ENSG00000153774	CFDP1			-1.27059	0.00277579	0.0791084
+pH fractionation/SP	Q96JY6-5	Isoform 5 of PDZ and LIM domain protein 2 OS=Homo sapiens OX=9606 GN=PDLIM2	ENSG00000120913	PDLIM2			3.29684	0.00278889	0.0791084
+pH fractionation/SP	Q6UWZ7	BRCA1-A complex subunit Abraxas 1 OS=Homo sapiens OX=9606 GN=ABRAXAS1 PE=1 SV=2	ENSG00000163322	FAM175A; ABRAXAS1			2.33476	0.0027961	0.0791084
+pH fractionation/SP	Q9BVW5	TIMELESS-interacting protein OS=Homo sapiens OX=9606 GN=TIPIN PE=1 SV=2	ENSG00000075131	TIPIN			-2.25703	0.00283259	0.0791084
+pH fractionation/SP	Q9Y394	Dehydrogenase/reductase SDR family member 7 OS=Homo sapiens OX=9606 GN=DHRS7 PE=1 SV=1	ENSG00000100612	DHRS7			1.69589	0.00284129	0.0791084
+pH fractionation/SP	Q9NVF7	F-box only protein 28 OS=Homo sapiens OX=9606 GN=FBXO28 PE=1 SV=1	ENSG00000143756	FBXO28			1.73263	0.00286326	0.0792892
+pH fractionation/SP	Q96CX6	Leucine-rich repeat-containing protein 58 OS=Homo sapiens OX=9606 GN=LRRC58 PE=1 SV=2	ENSG00000163428	LRRC58			-3.87699	0.00287967	0.0793147
+pH fractionation/RefSeq	Q96BR5	cytochrome c oxidase assembly factor 7 (putative) (COA7), mRNA	ENSG00000162377	COA7	NM_023077.2_1		-1.30671	0.00294033	0.0908407
+pH fractionation/SP	Q9NSP4	Centromere protein M OS=Homo sapiens OX=9606 GN=CENPM PE=1 SV=1	ENSG00000100162	CENPM			-2.80546	0.00294743	0.0799484
-pH fractionation/SP	Q9Y608	Leucine-rich repeat flightless-interacting protein 2 OS=Homo sapiens OX=9606 GN=LRRFIP2 PE=1 SV=1	ENSG00000093167	LRRFIP2			1.33533	0.00296245	0.0395709
+pH fractionation/SP	Q13309	S-phase kinase-associated protein 2 OS=Homo sapiens OX=9606 GN=SKP2 PE=1 SV=2	ENSG00000145604	SKP2			-3.0641	0.00301767	0.0811629
+pH fractionation/SP	O95319-2	Isoform 2 of CUGBP Elav-like family member 2 OS=Homo sapiens OX=9606 GN=CELF2	ENSG00000048740	CELF2			1.69671	0.00303057	0.0811629
+pH fractionation/SP	Q14344	Guanine nucleotide-binding protein subunit alpha-13 OS=Homo sapiens OX=9606 GN=GNA13 PE=1 SV=2	ENSG00000120063	GNA13			1.05968	0.00305767	0.0811629
+pH fractionation/SP	P40818	Ubiquitin carboxyl-terminal hydrolase 8 OS=Homo sapiens OX=9606 GN=USP8 PE=1 SV=1	ENSG00000138592	USP8			1.0533	0.00311323	0.0815624
+pH fractionation/SP	Q96R06	Sperm-associated antigen 5 OS=Homo sapiens OX=9606 GN=SPAG5 PE=1 SV=2	ENSG00000076382	SPAG5			-1.9709	0.00314245	0.0815624
+pH fractionation/SP	P98179	RNA-binding protein 3 OS=Homo sapiens OX=9606 GN=RBM3 PE=1 SV=1	ENSG00000102317	RBM3			-1.56188	0.00321617	0.0815624
+pH fractionation/SP	Q8N7H5	RNA polymerase II-associated factor 1 homolog OS=Homo sapiens OX=9606 GN=PAF1 PE=1 SV=2	ENSG00000006712	PAF1			-1.09804	0.00323988	0.0815624
+pH fractionation/SP	P11234-2	Isoform 2 of Ras-related protein Ral-B OS=Homo sapiens OX=9606 GN=RALB		RALB			2.86406	0.00325417	0.0815624
+pH fractionation/SP	Q14289	Protein-tyrosine kinase 2-beta OS=Homo sapiens OX=9606 GN=PTK2B PE=1 SV=2	ENSG00000120899	PTK2B			2.29046	0.00326822	0.0815624
+pH fractionation/SP	P50452	Serpin B8 OS=Homo sapiens OX=9606 GN=SERPINB8 PE=1 SV=2	ENSG00000166401	SERPINB8			2.81807	0.00343917	0.0835337
+pH fractionation/SP	A6NDG6	Glycerol-3-phosphate phosphatase OS=Homo sapiens OX=9606 GN=PGP PE=1 SV=1	ENSG00000184207	PGP			-1.03299	0.00344049	0.0835337
+pH fractionation/SP	P08243	Asparagine synthetase [glutamine-hydrolyzing] OS=Homo sapiens OX=9606 GN=ASNS PE=1 SV=4	ENSG00000070669	ASNS			1.1226	0.00346357	0.0836974
+pH fractionation/SP	Q9UHR5	SAP30-binding protein OS=Homo sapiens OX=9606 GN=SAP30BP PE=1 SV=1	ENSG00000161526	SAP30BP			1.63352	0.00350314	0.0842562
+pH fractionation/SP	Q9BRL6	Serine/arginine-rich splicing factor 8 OS=Homo sapiens OX=9606 GN=SRSF8 PE=1 SV=1	ENSG00000263465	SRSF8			-1.75019	0.00368226	0.086421
-pH fractionation/SP	Q8IX90	Spindle and kinetochore-associated protein 3 OS=Homo sapiens OX=9606 GN=SKA3 PE=1 SV=2	ENSG00000165480	SKA3			-1.49074	0.00371562	0.0432401
+pH fractionation/SP	P33316	Deoxyuridine 5'-triphosphate nucleotidohydrolase, mitochondrial OS=Homo sapiens OX=9606 GN=DUT PE=1 SV=4	ENSG00000128951	DUT			-1.86508	0.00372915	0.0864453
-pH fractionation/SP	P30622	CAP-Gly domain-containing linker protein 1 OS=Homo sapiens OX=9606 GN=CLIP1 PE=1 SV=2	ENSG00000130779	CLIP1			1.19867	0.00375344	0.0432401
+pH fractionation/SP	O14777	Kinetochore protein NDC80 homolog OS=Homo sapiens OX=9606 GN=NDC80 PE=1 SV=1	ENSG00000080986	NDC80			-3.91306	0.0037773	0.0867763
-pH fractionation/SP	O43561	Linker for activation of T-cells family member 1 OS=Homo sapiens OX=9606 GN=LAT PE=1 SV=1	ENSG00000213658	LAT			5.04767	0.00382144	0.0433331
+pH fractionation/SP	Q9BX67	Junctional adhesion molecule C OS=Homo sapiens OX=9606 GN=JAM3 PE=1 SV=1	ENSG00000166086	JAM3			-2.74919	0.0038712	0.0870474
+pH fractionation/SP	Q15762	CD226 antigen OS=Homo sapiens OX=9606 GN=CD226 PE=1 SV=2	ENSG00000150637	CD226			3.59638	0.00387906	0.0870474
+pH fractionation/SP	P09382	Galectin-1 OS=Homo sapiens OX=9606 GN=LGALS1 PE=1 SV=2	ENSG00000100097	LGALS1			3.68903	0.00389105	0.0870474
+pH fractionation/SP	P22681	E3 ubiquitin-protein ligase CBL OS=Homo sapiens OX=9606 GN=CBL PE=1 SV=2	ENSG00000110395	CBL			1.31981	0.00393821	0.0876026
+pH fractionation/SP	Q96HE9	Proline-rich protein 11 OS=Homo sapiens OX=9606 GN=PRR11 PE=1 SV=1	ENSG00000068489	PRR11			1.65299	0.00400917	0.0881086
+pH fractionation/SP	O43293	Death-associated protein kinase 3 OS=Homo sapiens OX=9606 GN=DAPK3 PE=1 SV=1	ENSG00000167657	DAPK3			1.142	0.00404168	0.0881086
-pH fractionation/SP	Q99871-2	Isoform 2 of HAUS augmin-like complex subunit 7 OS=Homo sapiens OX=9606 GN=HAUS7		HAUS7			-1.30099	0.00408017	0.04394
+pH fractionation/SP	P31153	S-adenosylmethionine synthase isoform type-2 OS=Homo sapiens OX=9606 GN=MAT2A PE=1 SV=1	ENSG00000168906	MAT2A			-1.42484	0.00408749	0.0883553
+pH fractionation/SP	Q96G74	OTU domain-containing protein 5 OS=Homo sapiens OX=9606 GN=OTUD5 PE=1 SV=1	ENSG00000068308	OTUD5			-3.51612	0.00416308	0.0889328
+pH fractionation/SP	P27701	CD82 antigen OS=Homo sapiens OX=9606 GN=CD82 PE=1 SV=1	ENSG00000085117	CD82			3.10183	0.00420846	0.0889328
+pH fractionation/SP	Q8NEW0	Zinc transporter 7 OS=Homo sapiens OX=9606 GN=SLC30A7 PE=2 SV=1	ENSG00000162695	SLC30A7			1.26748	0.00422458	0.0889328
+pH fractionation/SP	P22413	Ectonucleotide pyrophosphatase/phosphodiesterase family member 1 OS=Homo sapiens OX=9606 GN=ENPP1 PE=1 SV=2	ENSG00000197594	ENPP1			3.69277	0.00422716	0.0889328
+pH fractionation/SP	P36776	Lon protease homolog, mitochondrial OS=Homo sapiens OX=9606 GN=LONP1 PE=1 SV=2	ENSG00000196365	LONP1			-1.0323	0.00423953	0.0889328
+pH fractionation/SP	Q7Z5J4	Retinoic acid-induced protein 1 OS=Homo sapiens OX=9606 GN=RAI1 PE=1 SV=2	ENSG00000108557	RAI1			1.24041	0.00425308	0.0889328
+pH fractionation/SP	P62633	Cellular nucleic acid-binding protein OS=Homo sapiens OX=9606 GN=CNBP PE=1 SV=1	ENSG00000169714	CNBP			-1.84849	0.00430021	0.0894357
+pH fractionation/SP	O60508	Pre-mRNA-processing factor 17 OS=Homo sapiens OX=9606 GN=CDC40 PE=1 SV=1	ENSG00000168438	CDC40			1.8629	0.00431205	0.0894357
+pH fractionation/RefSeq	Q99595	translocase of inner mitochondrial membrane 17A (TIMM17A), mRNA	ENSG00000134375	TIMM17A	NM_006335.2_3		-4.32039	0.00435379	0.103659
+pH fractionation/SP	Q9NPA3	Mid1-interacting protein 1 OS=Homo sapiens OX=9606 GN=MID1IP1 PE=1 SV=1	ENSG00000165175	MID1IP1			-2.94776	0.00443492	0.0902047
+pH fractionation/SP	Q86SK9	Stearoyl-CoA desaturase 5 OS=Homo sapiens OX=9606 GN=SCD5 PE=1 SV=2	ENSG00000145284	SCD5			-3.44121	0.00447052	0.0902047
+pH fractionation/SP	Q96AQ6	Pre-B-cell leukemia transcription factor-interacting protein 1 OS=Homo sapiens OX=9606 GN=PBXIP1 PE=1 SV=1	ENSG00000163346	PBXIP1			3.5319	0.00453915	0.09046
+pH fractionation/SP	Q5BJH7	Protein YIF1B OS=Homo sapiens OX=9606 GN=YIF1B PE=1 SV=1	ENSG00000167645	YIF1B			1.2363	0.00457493	0.09046
+pH fractionation/SP	Q8NFH5	Nucleoporin NUP35 OS=Homo sapiens OX=9606 GN=NUP35 PE=1 SV=1	ENSG00000163002	NUP35			-3.35838	0.00476622	0.0929765
+pH fractionation/SP	Q16763	Ubiquitin-conjugating enzyme E2 S OS=Homo sapiens OX=9606 GN=UBE2S PE=1 SV=2	ENSG00000108106	UBE2S			-2.66252	0.00477314	0.0929765
-pH fractionation/RefSeq		Homo sapiens family with sequence similarity 234 member B (FAM234B), mRNA		FAM234B	NM_020853.1_2		1.0576	0.00482443	0.0471068
+pH fractionation/SP	Q12849	G-rich sequence factor 1 OS=Homo sapiens OX=9606 GN=GRSF1 PE=1 SV=3	ENSG00000132463	GRSF1			-1.19389	0.00490795	0.0937052
+pH fractionation/SP	P52630	Signal transducer and activator of transcription 2 OS=Homo sapiens OX=9606 GN=STAT2 PE=1 SV=1	ENSG00000170581	STAT2			1.90509	0.00492197	0.0937052
+pH fractionation/SP	P78559-2	Isoform 2 of Microtubule-associated protein 1A OS=Homo sapiens OX=9606 GN=MAP1A		MAP1A			-1.05456	0.00497302	0.0937052
+pH fractionation/SP	O14757	Serine/threonine-protein kinase Chk1 OS=Homo sapiens OX=9606 GN=CHEK1 PE=1 SV=2	ENSG00000149554	CHEK1			-3.89367	0.00504986	0.0942672
-pH fractionation/SP	A2RU67	Protein FAM234B OS=Homo sapiens OX=9606 GN=FAM234B PE=1 SV=1	ENSG00000084444	KIAA1467; FAM234B			1.17727	0.00508973	0.048299
+pH fractionation/SP	P56134	ATP synthase subunit f, mitochondrial OS=Homo sapiens OX=9606 GN=ATP5J2 PE=1 SV=3	ENSG00000241468	ATP5J2			1.8866	0.00512168	0.0942672
+pH fractionation/SP	P62699	Protein yippee-like 5 OS=Homo sapiens OX=9606 GN=YPEL5 PE=1 SV=1	ENSG00000119801	YPEL5			2.28614	0.00513599	0.0942672
+pH fractionation/SP	Q8N2G8	GH3 domain-containing protein OS=Homo sapiens OX=9606 GN=GHDC PE=1 SV=2	ENSG00000167925	GHDC			2.51845	0.00520123	0.0942672
+pH fractionation/SP	Q14764	Major vault protein OS=Homo sapiens OX=9606 GN=MVP PE=1 SV=4	ENSG00000013364	MVP			2.96343	0.00520649	0.0942672
-pH fractionation/SP	O95169	NADH dehydrogenase [ubiquinone] 1 beta subcomplex subunit 8, mitochondrial OS=Homo sapiens OX=9606 GN=NDUFB8 PE=1 SV=1	ENSG00000166136	NDUFB8			-1.09753	0.00522257	0.0483916
+pH fractionation/SP	O15228	Dihydroxyacetone phosphate acyltransferase OS=Homo sapiens OX=9606 GN=GNPAT PE=1 SV=1	ENSG00000116906	GNPAT			-1.34513	0.00523284	0.0942672
+pH fractionation/SP	P31321	cAMP-dependent protein kinase type I-beta regulatory subunit OS=Homo sapiens OX=9606 GN=PRKAR1B PE=1 SV=4	ENSG00000188191	PRKAR1B			-1.97844	0.00527277	0.0942672
+pH fractionation/SP	Q10588	ADP-ribosyl cyclase/cyclic ADP-ribose hydrolase 2 OS=Homo sapiens OX=9606 GN=BST1 PE=1 SV=2	ENSG00000109743	BST1			3.13986	0.00529439	0.0942672
+pH fractionation/SP	Q9Y4R8	Telomere length regulation protein TEL2 homolog OS=Homo sapiens OX=9606 GN=TELO2 PE=1 SV=2	ENSG00000100726	TELO2			-1.47092	0.0053026	0.0942672
+pH fractionation/SP	P06396	Gelsolin OS=Homo sapiens OX=9606 GN=GSN PE=1 SV=1	ENSG00000148180	GSN			1.47609	0.00535462	0.0942672
+pH fractionation/SP	Q9H6S0	Probable ATP-dependent RNA helicase YTHDC2 OS=Homo sapiens OX=9606 GN=YTHDC2 PE=1 SV=2	ENSG00000047188	YTHDC2			-1.15455	0.00542769	0.095114
+pH fractionation/SP	O60566-3	Isoform 3 of Mitotic checkpoint serine/threonine-protein kinase BUB1 beta OS=Homo sapiens OX=9606 GN=BUB1B	ENSG00000156970	BUB1B			-3.46153	0.00543986	0.095114
+pH fractionation/SP	Q14847	LIM and SH3 domain protein 1 OS=Homo sapiens OX=9606 GN=LASP1 PE=1 SV=2	ENSG00000002834	LASP1			1.35447	0.00547808	0.0954564
+pH fractionation/SP	O60551	Glycylpeptide N-tetradecanoyltransferase 2 OS=Homo sapiens OX=9606 GN=NMT2 PE=1 SV=1	ENSG00000152465	NMT2			4.07377	0.00557779	0.0965551
+pH fractionation/SP	Q9BRP1	Programmed cell death protein 2-like OS=Homo sapiens OX=9606 GN=PDCD2L PE=1 SV=1	ENSG00000126249	PDCD2L			-2.03358	0.00559014	0.0965551
+pH fractionation/SP	Q32P44	Echinoderm microtubule-associated protein-like 3 OS=Homo sapiens OX=9606 GN=EML3 PE=1 SV=1	ENSG00000149499	EML3			1.45346	0.00565211	0.0965551
+pH fractionation/SP	P48960	CD97 antigen OS=Homo sapiens OX=9606 GN=CD97 PE=1 SV=4	ENSG00000123146	CD97; ADGRE5			-1.98363	0.00576156	0.0974141
+pH fractionation/SP	Q9BSQ5-2	Isoform 2 of Cerebral cavernous malformations 2 protein OS=Homo sapiens OX=9606 GN=CCM2	ENSG00000136280	CCM2			1.53428	0.00588564	0.0988594
+pH fractionation/SP	P32456	Guanylate-binding protein 2 OS=Homo sapiens OX=9606 GN=GBP2 PE=1 SV=3	ENSG00000162645	GBP2			3.0204	0.00592508	0.0988736
+pH fractionation/SP	Q9ULE6	Paladin OS=Homo sapiens OX=9606 GN=PALD1 PE=1 SV=3	ENSG00000107719	PALD1			1.80235	0.00599104	0.0990016
+pH fractionation/SP	P42695	Condensin-2 complex subunit D3 OS=Homo sapiens OX=9606 GN=NCAPD3 PE=1 SV=2	ENSG00000151503	NCAPD3			-1.27179	0.00599437	0.0990016
-pH fractionation/SP	Q96HC4	PDZ and LIM domain protein 5 OS=Homo sapiens OX=9606 GN=PDLIM5 PE=1 SV=5	ENSG00000163110	PDLIM5			1.88622	0.00600377	0.0506267
+pH fractionation/RefSeq	Q8WTX7	cytosolic arginine sensor for mTORC1 subunit 1 (CASTOR1), mRNA	ENSG00000239282	CASTOR1	NM_001037666.2_1		1.24954	0.0060203	0.121747
+pH fractionation/SP	P20339	Ras-related protein Rab-5A OS=Homo sapiens OX=9606 GN=RAB5A PE=1 SV=2	ENSG00000144566	RAB5A			3.92168	0.00603134	0.0990338
+pH fractionation/SP	P17252	Protein kinase C alpha type OS=Homo sapiens OX=9606 GN=PRKCA PE=1 SV=4	ENSG00000154229	PRKCA			-2.14876	0.0061174	0.0992352
-pH fractionation/SP	Q9H400	Lck-interacting transmembrane adapter 1 OS=Homo sapiens OX=9606 GN=LIME1 PE=1 SV=1	ENSG00000203896	LIME1			1.12599	0.00614964	0.0516546
+pH fractionation/SP	Q8WWW0-2	Isoform 2 of Ras association domain-containing protein 5 OS=Homo sapiens OX=9606 GN=RASSF5	ENSG00000266094	RASSF5			2.61174	0.00615983	0.0992352
+pH fractionation/SP	Q8N9N8	Probable RNA-binding protein EIF1AD OS=Homo sapiens OX=9606 GN=EIF1AD PE=1 SV=1	ENSG00000175376	EIF1AD			-1.29471	0.00622247	0.0997468
+pH fractionation/SP	Q8NF37	Lysophosphatidylcholine acyltransferase 1 OS=Homo sapiens OX=9606 GN=LPCAT1 PE=1 SV=2	ENSG00000153395	LPCAT1			-1.35099	0.00624145	0.0997468
+pH fractionation/SP	Q9NUV9	GTPase IMAP family member 4 OS=Homo sapiens OX=9606 GN=GIMAP4 PE=1 SV=1	ENSG00000133574	GIMAP4			1.82816	0.00626862	0.0997468
+pH fractionation/SP	Q86YD1	Prostate tumor-overexpressed gene 1 protein OS=Homo sapiens OX=9606 GN=PTOV1 PE=1 SV=1	ENSG00000104960	PTOV1			-1.96536	0.00634282	0.100601
+pH fractionation/SP	Q13510-2	Isoform 2 of Acid ceramidase OS=Homo sapiens OX=9606 GN=ASAH1	ENSG00000104763	ASAH1			1.35463	0.00641251	0.101393
-pH fractionation/SP	Q02880-2	Isoform Beta-1 of DNA topoisomerase 2-beta OS=Homo sapiens OX=9606 GN=TOP2B	ENSG00000077097	TOP2B			1.75088	0.00643922	0.0523521
+pH fractionation/SP	Q8WVX9	Fatty acyl-CoA reductase 1 OS=Homo sapiens OX=9606 GN=FAR1 PE=1 SV=1	ENSG00000197601	FAR1			-2.4768	0.00644904	0.101657
+pH fractionation/SP	Q96MU7	YTH domain-containing protein 1 OS=Homo sapiens OX=9606 GN=YTHDC1 PE=1 SV=3	ENSG00000083896	YTHDC1			-1.12715	0.00649322	0.101747
+pH fractionation/SP	Q13895	Bystin OS=Homo sapiens OX=9606 GN=BYSL PE=1 SV=3	ENSG00000112578	BYSL			-1.05697	0.00659607	0.10271
+pH fractionation/SP	P37235	Hippocalcin-like protein 1 OS=Homo sapiens OX=9606 GN=HPCAL1 PE=1 SV=3	ENSG00000115756	HPCAL1			1.29497	0.00663223	0.10296
-pH fractionation/SP	Q9Y605	MORF4 family-associated protein 1 OS=Homo sapiens OX=9606 GN=MRFAP1 PE=1 SV=1	ENSG00000179010	MRFAP1			-2.56133	0.00671138	0.0531305
+pH fractionation/SP	O43709-3	Isoform 3 of Probable 18S rRNA (guanine-N(7))-methyltransferase OS=Homo sapiens OX=9606 GN=BUD23	ENSG00000071462	WBSCR22; BUD23			-1.24716	0.00672632	0.103792
-pH fractionation/SP	Q6GTX8	Leukocyte-associated immunoglobulin-like receptor 1 OS=Homo sapiens OX=9606 GN=LAIR1 PE=1 SV=1	ENSG00000274110	LAIR1			2.46886	0.0067487	0.0531305
+pH fractionation/SP	Q8NHV4-3	Isoform 3 of Protein NEDD1 OS=Homo sapiens OX=9606 GN=NEDD1	ENSG00000139350	NEDD1			-1.02317	0.00688025	0.104592
+pH fractionation/SP	Q9Y6Y0	Influenza virus NS1A-binding protein OS=Homo sapiens OX=9606 GN=IVNS1ABP PE=1 SV=3	ENSG00000116679	IVNS1ABP			-1.90013	0.0069282	0.104946
+pH fractionation/SP	P52434	DNA-directed RNA polymerases I, II, and III subunit RPABC3 OS=Homo sapiens OX=9606 GN=POLR2H PE=1 SV=4	ENSG00000163882	POLR2H			-1.02593	0.00696169	0.104946
+pH fractionation/SP	Q96S97	Myeloid-associated differentiation marker OS=Homo sapiens OX=9606 GN=MYADM PE=1 SV=2	ENSG00000179820	MYADM			1.756	0.00708931	0.105189
+pH fractionation/SP	Q9BYC5	Alpha-(1,6)-fucosyltransferase OS=Homo sapiens OX=9606 GN=FUT8 PE=1 SV=2	ENSG00000033170	FUT8			1.63337	0.00711758	0.105189
+pH fractionation/SP	Q9H5V9	UPF0428 protein CXorf56 OS=Homo sapiens OX=9606 GN=CXorf56 PE=1 SV=1		CXorf56			-2.0106	0.0071425	0.105189
+pH fractionation/SP	Q9NYY8	FAST kinase domain-containing protein 2, mitochondrial OS=Homo sapiens OX=9606 GN=FASTKD2 PE=1 SV=1	ENSG00000118246	FASTKD2			-1.97514	0.00716372	0.105189
+pH fractionation/SP	P07737	Profilin-1 OS=Homo sapiens OX=9606 GN=PFN1 PE=1 SV=2	ENSG00000108518	PFN1			1.24449	0.0071659	0.105189
+pH fractionation/SP	Q86VM9	Zinc finger CCCH domain-containing protein 18 OS=Homo sapiens OX=9606 GN=ZC3H18 PE=1 SV=2	ENSG00000158545	ZC3H18			-2.15647	0.00720683	0.105487
+pH fractionation/SP	Q14527	Helicase-like transcription factor OS=Homo sapiens OX=9606 GN=HLTF PE=1 SV=2	ENSG00000071794	HLTF			-1.23512	0.00727568	0.106192
+pH fractionation/SP	P00491	Purine nucleoside phosphorylase OS=Homo sapiens OX=9606 GN=PNP PE=1 SV=2	ENSG00000198805	PNP			1.37543	0.0073623	0.106888
+pH fractionation/SP	Q9NZJ0	Denticleless protein homolog OS=Homo sapiens OX=9606 GN=DTL PE=1 SV=3	ENSG00000143476	DTL			-3.21097	0.00736509	0.106888
+pH fractionation/SP	Q8TEK3	Histone-lysine N-methyltransferase, H3 lysine-79 specific OS=Homo sapiens OX=9606 GN=DOT1L PE=1 SV=2		DOT1L			-1.81779	0.00742527	0.107102
+pH fractionation/SP	Q92609-2	Isoform 2 of TBC1 domain family member 5 OS=Homo sapiens OX=9606 GN=TBC1D5	ENSG00000131374	TBC1D5			-1.33195	0.00745154	0.107102
+pH fractionation/SP	Q99943	1-acyl-sn-glycerol-3-phosphate acyltransferase alpha OS=Homo sapiens OX=9606 GN=AGPAT1 PE=1 SV=2	ENSG00000235758	AGPAT1			-2.22418	0.00757037	0.107432
+pH fractionation/SP	Q9NZ63	Telomere length and silencing protein 1 homolog OS=Homo sapiens OX=9606 GN=C9orf78 PE=1 SV=1	ENSG00000136819	C9orf78			-3.07092	0.00780916	0.109777
+pH fractionation/SP	Q14444	Caprin-1 OS=Homo sapiens OX=9606 GN=CAPRIN1 PE=1 SV=2	ENSG00000135387	CAPRIN1			-1.08061	0.00782705	0.109777
+pH fractionation/SP	O60281	Zinc finger protein 292 OS=Homo sapiens OX=9606 GN=ZNF292 PE=1 SV=3	ENSG00000188994	ZNF292			1.36017	0.00784272	0.109777
+pH fractionation/SP	Q9BVS4	Serine/threonine-protein kinase RIO2 OS=Homo sapiens OX=9606 GN=RIOK2 PE=1 SV=2	ENSG00000058729	RIOK2			-1.69706	0.00792251	0.109918
-pH fractionation/SP	Q13191	E3 ubiquitin-protein ligase CBL-B OS=Homo sapiens OX=9606 GN=CBLB PE=1 SV=2	ENSG00000114423	CBLB			1.85975	0.00802256	0.0549138
+pH fractionation/SP	O94804	Serine/threonine-protein kinase 10 OS=Homo sapiens OX=9606 GN=STK10 PE=1 SV=1	ENSG00000072786	STK10			2.02942	0.0080394	0.109918
+pH fractionation/SP	Q92664	Transcription factor IIIA OS=Homo sapiens OX=9606 GN=GTF3A PE=1 SV=3	ENSG00000122034	GTF3A			-2.02467	0.00804663	0.109918
+pH fractionation/SP	P0CJ78	Zinc finger protein 865 OS=Homo sapiens OX=9606 GN=ZNF865 PE=1 SV=1	ENSG00000261221	ZNF865			1.19503	0.00814931	0.110295
+pH fractionation/SP	P42575	Caspase-2 OS=Homo sapiens OX=9606 GN=CASP2 PE=1 SV=2	ENSG00000106144	CASP2			-2.27605	0.00815165	0.110295
+pH fractionation/SP	Q8TAA9	Vang-like protein 1 OS=Homo sapiens OX=9606 GN=VANGL1 PE=1 SV=1	ENSG00000173218	VANGL1			-1.88631	0.00815963	0.110295
+pH fractionation/SP	Q9GZZ1	N-alpha-acetyltransferase 50 OS=Homo sapiens OX=9606 GN=NAA50 PE=1 SV=1	ENSG00000121579	NAA50			-1.02086	0.0083419	0.111325
+pH fractionation/SP	P11171	Protein 4.1 OS=Homo sapiens OX=9606 GN=EPB41 PE=1 SV=4	ENSG00000159023	EPB41			-1.59709	0.00843803	0.111325
+pH fractionation/SP	Q9Y6A5	Transforming acidic coiled-coil-containing protein 3 OS=Homo sapiens OX=9606 GN=TACC3 PE=1 SV=1	ENSG00000013810	TACC3			-2.71686	0.00845286	0.111325
+pH fractionation/SP	P62942	Peptidyl-prolyl cis-trans isomerase FKBP1A OS=Homo sapiens OX=9606 GN=FKBP1A PE=1 SV=2	ENSG00000088832	FKBP1A			1.229	0.00847852	0.111325
+pH fractionation/SP	O60234	Glia maturation factor gamma OS=Homo sapiens OX=9606 GN=GMFG PE=1 SV=1	ENSG00000130755	GMFG			1.35754	0.00848548	0.111325
-pH fractionation/SP	O75438	NADH dehydrogenase [ubiquinone] 1 beta subcomplex subunit 1 OS=Homo sapiens OX=9606 GN=NDUFB1 PE=1 SV=1	ENSG00000183648	NDUFB1			-1.19144	0.00851658	0.0556392
+pH fractionation/SP	P06241	Tyrosine-protein kinase Fyn OS=Homo sapiens OX=9606 GN=FYN PE=1 SV=3	ENSG00000010810	FYN			-5.036	0.00852856	0.111325
+pH fractionation/SP	Q7Z7A3	Cytoplasmic tRNA 2-thiolation protein 1 OS=Homo sapiens OX=9606 GN=CTU1 PE=1 SV=1	ENSG00000142544	CTU1			-2.53021	0.00853252	0.111325
-pH fractionation/SP	Q7Z569	BRCA1-associated protein OS=Homo sapiens OX=9606 GN=BRAP PE=1 SV=2	ENSG00000089234	BRAP			1.45968	0.00853392	0.0556392
+pH fractionation/SP	Q13043	Serine/threonine-protein kinase 4 OS=Homo sapiens OX=9606 GN=STK4 PE=1 SV=2	ENSG00000101109	STK4			1.2613	0.00855077	0.111325
+pH fractionation/SP	Q8IY47	Kelch repeat and BTB domain-containing protein 2 OS=Homo sapiens OX=9606 GN=KBTBD2 PE=1 SV=2	ENSG00000170852	KBTBD2			1.78767	0.00856182	0.111325
+pH fractionation/SP	P36639	7,8-dihydro-8-oxoguanine triphosphatase OS=Homo sapiens OX=9606 GN=NUDT1 PE=1 SV=3		NUDT1			-1.34959	0.00865822	0.111575
+pH fractionation/SP	Q5BKZ1-3	Isoform 3 of DBIRD complex subunit ZNF326 OS=Homo sapiens OX=9606 GN=ZNF326		ZNF326			1.80326	0.00874621	0.112298
+pH fractionation/SP	Q9BV38	WD repeat-containing protein 18 OS=Homo sapiens OX=9606 GN=WDR18 PE=1 SV=2	ENSG00000065268	WDR18			-1.69888	0.0088241	0.113015
-pH fractionation/RefSeq		Homo sapiens sterile alpha motif and leucine zipper containing kinase AZK (ZAK), transcript variant 1, mRNA		ZAK	NM_016653.2_2		-3.84228	0.00883166	0.0551824
+pH fractionation/SP	O95479	GDH/6PGL endoplasmic bifunctional protein OS=Homo sapiens OX=9606 GN=H6PD PE=1 SV=2	ENSG00000049239	H6PD			4.28359	0.0089879	0.113701
+pH fractionation/SP	Q01581	Hydroxymethylglutaryl-CoA synthase, cytoplasmic OS=Homo sapiens OX=9606 GN=HMGCS1 PE=1 SV=2	ENSG00000112972	HMGCS1			-1.10283	0.00898805	0.113701
+pH fractionation/SP	Q9NVM4	Protein arginine N-methyltransferase 7 OS=Homo sapiens OX=9606 GN=PRMT7 PE=1 SV=1	ENSG00000132600	PRMT7			-2.03843	0.00911652	0.114843
+pH fractionation/SP	Q9NZK5	Adenosine deaminase 2 OS=Homo sapiens OX=9606 GN=ADA2 PE=1 SV=2	ENSG00000093072	CECR1; ADA2			1.79384	0.00912379	0.114843
+pH fractionation/SP	Q9NVZ3-2	Isoform 2 of Adaptin ear-binding coat-associated protein 2 OS=Homo sapiens OX=9606 GN=NECAP2	ENSG00000157191	NECAP2			1.25657	0.00921846	0.115331
+pH fractionation/SP	Q16566	Calcium/calmodulin-dependent protein kinase type IV OS=Homo sapiens OX=9606 GN=CAMK4 PE=1 SV=1	ENSG00000152495	CAMK4			-1.79701	0.00923808	0.115331
+pH fractionation/SP	O15145	Actin-related protein 2/3 complex subunit 3 OS=Homo sapiens OX=9606 GN=ARPC3 PE=1 SV=3	ENSG00000111229	ARPC3			1.21482	0.0092526	0.115331
+pH fractionation/SP	P61018-2	Isoform 2 of Ras-related protein Rab-4B OS=Homo sapiens OX=9606 GN=RAB4B		RAB4B			1.59706	0.00933248	0.116044
-pH fractionation/SP	Q29963	HLA class I histocompatibility antigen, Cw-6 alpha chain OS=Homo sapiens OX=9606 GN=HLA-C PE=1 SV=2	ENSG00000228299	HLA-C			1.6463	0.00934208	0.057672
+pH fractionation/SP	Q9Y6K5	2'-5'-oligoadenylate synthase 3 OS=Homo sapiens OX=9606 GN=OAS3 PE=1 SV=3	ENSG00000111331	OAS3			2.63562	0.00944757	0.116521
+pH fractionation/SP	P29375	Lysine-specific demethylase 5A OS=Homo sapiens OX=9606 GN=KDM5A PE=1 SV=3	ENSG00000073614	KDM5A			2.2118	0.0094618	0.116521
-pH fractionation/SP	Q12802-2	Isoform 2 of A-kinase anchor protein 13 OS=Homo sapiens OX=9606 GN=AKAP13	ENSG00000170776	AKAP13			3.20147	0.0094791	0.0580491
+pH fractionation/SP	Q8WW01	tRNA-splicing endonuclease subunit Sen15 OS=Homo sapiens OX=9606 GN=TSEN15 PE=1 SV=1	ENSG00000198860	TSEN15			-2.85134	0.00950235	0.11674
+pH fractionation/SP	Q9UKD2	mRNA turnover protein 4 homolog OS=Homo sapiens OX=9606 GN=MRTO4 PE=1 SV=2	ENSG00000053372	MRTO4			-1.28662	0.00953209	0.116825
+pH fractionation/SP	P20292	Arachidonate 5-lipoxygenase-activating protein OS=Homo sapiens OX=9606 GN=ALOX5AP PE=1 SV=2	ENSG00000132965	ALOX5AP			1.55489	0.00967773	0.117759
+pH fractionation/SP	Q96HN2	Adenosylhomocysteinase 3 OS=Homo sapiens OX=9606 GN=AHCYL2 PE=1 SV=1	ENSG00000158467	AHCYL2			1.07856	0.00970025	0.117759
+pH fractionation/SP	O00182	Galectin-9 OS=Homo sapiens OX=9606 GN=LGALS9 PE=1 SV=2	ENSG00000168961	LGALS9			5.62433	0.0100106	0.119943
+pH fractionation/SP	P33552	Cyclin-dependent kinases regulatory subunit 2 OS=Homo sapiens OX=9606 GN=CKS2 PE=1 SV=1	ENSG00000123975	CKS2			-2.03072	0.0100206	0.119943
+pH fractionation/SP	Q13432	Protein unc-119 homolog A OS=Homo sapiens OX=9606 GN=UNC119 PE=1 SV=1	ENSG00000109103	UNC119			1.87249	0.0101064	0.120407
+pH fractionation/SP	P29728	2'-5'-oligoadenylate synthase 2 OS=Homo sapiens OX=9606 GN=OAS2 PE=1 SV=3	ENSG00000111335	OAS2			2.34873	0.0101374	0.120496
+pH fractionation/MAJIQ			ENSG00000132142	ENSG00000132142	ENSG00000132142:s:35687113-35687365_35641871-35687113_S2		-1.26251	0.0101754	0.376158
-pH fractionation/SP	Q16540	39S ribosomal protein L23, mitochondrial OS=Homo sapiens OX=9606 GN=MRPL23 PE=1 SV=1	ENSG00000214026	MRPL23			-1.0922	0.0101939	0.0600399
+pH fractionation/SP	Q13257	Mitotic spindle assembly checkpoint protein MAD2A OS=Homo sapiens OX=9606 GN=MAD2L1 PE=1 SV=1	ENSG00000164109	MAD2L1			-1.66094	0.0102242	0.121225
+pH fractionation/SP	P50552	Vasodilator-stimulated phosphoprotein OS=Homo sapiens OX=9606 GN=VASP PE=1 SV=3	ENSG00000125753	VASP			1.94249	0.0102927	0.121225
+pH fractionation/SP	Q99808-2	Isoform 2 of Equilibrative nucleoside transporter 1 OS=Homo sapiens OX=9606 GN=SLC29A1		SLC29A1			-3.6948	0.0106086	0.12374
+pH fractionation/SP	Q12933-2	Isoform 2 of TNF receptor-associated factor 2 OS=Homo sapiens OX=9606 GN=TRAF2		TRAF2			-2.768	0.010771	0.124559
+pH fractionation/SP	P31689	DnaJ homolog subfamily A member 1 OS=Homo sapiens OX=9606 GN=DNAJA1 PE=1 SV=2	ENSG00000086061	DNAJA1			-1.32287	0.0108901	0.125298
+pH fractionation/SP	Q96C19	EF-hand domain-containing protein D2 OS=Homo sapiens OX=9606 GN=EFHD2 PE=1 SV=1	ENSG00000142634	EFHD2			1.68832	0.0108996	0.125298
+pH fractionation/SP	Q6PIF6	Unconventional myosin-VIIb OS=Homo sapiens OX=9606 GN=MYO7B PE=1 SV=2	ENSG00000169994	MYO7B			-2.73152	0.0109082	0.125298
+pH fractionation/RefSeq	P84074	hippocalcin (HPCA), mRNA	ENSG00000121905	HPCA	NM_002143.2_1		1.22284	0.0109536	0.162362
+pH fractionation/SP	Q9HD26	Golgi-associated PDZ and coiled-coil motif-containing protein OS=Homo sapiens OX=9606 GN=GOPC PE=1 SV=1	ENSG00000047932	GOPC			-1.19227	0.0109814	0.125856
-pH fractionation/SP	P28074-3	Isoform 3 of Proteasome subunit beta type-5 OS=Homo sapiens OX=9606 GN=PSMB5	ENSG00000100804	PSMB5			2.75376	0.0110046	0.0623062
+pH fractionation/SP	A0MZ66-3	Isoform 3 of Shootin-1 OS=Homo sapiens OX=9606 GN=SHTN1		KIAA1598; SHTN1			-1.01065	0.0110908	0.126002
+pH fractionation/SP	Q86W50	U6 small nuclear RNA (adenine-(43)-N(6))-methyltransferase OS=Homo sapiens OX=9606 GN=METTL16 PE=1 SV=2	ENSG00000127804	METTL16			-1.35192	0.0111252	0.126002
+pH fractionation/SP	O60443	Gasdermin-E OS=Homo sapiens OX=9606 GN=GSDME PE=1 SV=2	ENSG00000105928	DFNA5; GSDME			2.74096	0.0111417	0.126002
+pH fractionation/RefSeq	Q96NB2	sideroflexin 2 (SFXN2), mRNA	ENSG00000156398	SFXN2	NM_178858.4_1		-1.91729	0.0112575	0.162362
+pH fractionation/SP	Q99797	Mitochondrial intermediate peptidase OS=Homo sapiens OX=9606 GN=MIPEP PE=1 SV=2	ENSG00000027001	MIPEP			-1.30311	0.0113082	0.127152
-pH fractionation/SP	O95167	NADH dehydrogenase [ubiquinone] 1 alpha subcomplex subunit 3 OS=Homo sapiens OX=9606 GN=NDUFA3 PE=1 SV=1	ENSG00000273642	NDUFA3			-1.33627	0.011376	0.0637438
+pH fractionation/SP	Q8IZ69	tRNA (uracil-5-)-methyltransferase homolog A OS=Homo sapiens OX=9606 GN=TRMT2A PE=1 SV=2	ENSG00000099899	TRMT2A			-1.00671	0.011427	0.127899
+pH fractionation/SP	P61024	Cyclin-dependent kinases regulatory subunit 1 OS=Homo sapiens OX=9606 GN=CKS1B PE=1 SV=1	ENSG00000173207	CKS1B			-2.5887	0.0114343	0.127899
+pH fractionation/RefSeq	P46821	microtubule associated protein 1B (MAP1B), transcript variant 1, mRNA	ENSG00000131711	MAP1B	NM_005909.4_3		-1.76662	0.0114674	0.163184
+pH fractionation/SP	O95372	Acyl-protein thioesterase 2 OS=Homo sapiens OX=9606 GN=LYPLA2 PE=1 SV=1	ENSG00000011009	LYPLA2			1.68917	0.0117257	0.130023
+pH fractionation/MAJIQ		ARHGAP27P1-BPTFP1-KPNA2P3 readthrough, transcribed pseudogene [Source:HGNC Symbol;Acc:HGNC:52873]	ENSG00000215769	ARHGAP27P1-BPTFP1-KPNA2P3	ENSG00000215769:s:62747925-62748074_62747266-62747925_S0		-1.50382	0.0118228	0.376158
+pH fractionation/SP	Q9BZH6	WD repeat-containing protein 11 OS=Homo sapiens OX=9606 GN=WDR11 PE=1 SV=1	ENSG00000120008	WDR11			1.36636	0.0118437	0.131048
+pH fractionation/SP	P48059-3	Isoform 3 of LIM and senescent cell antigen-like-containing domain protein 1 OS=Homo sapiens OX=9606 GN=LIMS1	ENSG00000169756	LIMS1			1.4478	0.0119804	0.131779
+pH fractionation/SP	O60427	Fatty acid desaturase 1 OS=Homo sapiens OX=9606 GN=FADS1 PE=1 SV=3		FADS1			-4.39217	0.0121864	0.13325
+pH fractionation/MAJIQ	O75153	clustered mitochondria homolog [Source:HGNC Symbol;Acc:HGNC:29094]	ENSG00000132361	CLUH	ENSG00000132361:t:2599728-2599832_2599829-2600013_S1		-2.36191	0.012591	0.376158
+pH fractionation/SP	O60925	Prefoldin subunit 1 OS=Homo sapiens OX=9606 GN=PFDN1 PE=1 SV=2	ENSG00000113068	PFDN1			1.1461	0.0126026	0.136122
+pH fractionation/SP	Q96EB6	NAD-dependent protein deacetylase sirtuin-1 OS=Homo sapiens OX=9606 GN=SIRT1 PE=1 SV=2	ENSG00000096717	SIRT1			-1.5511	0.0126102	0.136122
+pH fractionation/SP	Q9ULW3	Activator of basal transcription 1 OS=Homo sapiens OX=9606 GN=ABT1 PE=1 SV=1	ENSG00000146109	ABT1			1.5887	0.0126466	0.136122
-pH fractionation/SP	Q6NSJ2	Pleckstrin homology-like domain family B member 3 OS=Homo sapiens OX=9606 GN=PHLDB3 PE=2 SV=3	ENSG00000176531	PHLDB3			2.13154	0.0127071	0.0671013
+pH fractionation/SP	Q9BXW9-1	Isoform 1 of Fanconi anemia group D2 protein OS=Homo sapiens OX=9606 GN=FANCD2	ENSG00000144554	FANCD2			-1.71873	0.012821	0.13741
+pH fractionation/SP	O15372	Eukaryotic translation initiation factor 3 subunit H OS=Homo sapiens OX=9606 GN=EIF3H PE=1 SV=1	ENSG00000147677	EIF3H			-1.24575	0.0131128	0.139322
+pH fractionation/SP	P35658	Nuclear pore complex protein Nup214 OS=Homo sapiens OX=9606 GN=NUP214 PE=1 SV=2	ENSG00000126883	NUP214			1.37478	0.0131716	0.139322
+pH fractionation/SP	P40692	DNA mismatch repair protein Mlh1 OS=Homo sapiens OX=9606 GN=MLH1 PE=1 SV=1	ENSG00000076242	MLH1			-2.88665	0.0131868	0.139322
+pH fractionation/SP	Q9UJX6	Anaphase-promoting complex subunit 2 OS=Homo sapiens OX=9606 GN=ANAPC2 PE=1 SV=1	ENSG00000176248	ANAPC2			-1.55317	0.0132454	0.139322
+pH fractionation/SP	Q9Y266	Nuclear migration protein nudC OS=Homo sapiens OX=9606 GN=NUDC PE=1 SV=1	ENSG00000090273	NUDC			-1.50076	0.0132547	0.139322
+pH fractionation/SP	P28062	Proteasome subunit beta type-8 OS=Homo sapiens OX=9606 GN=PSMB8 PE=1 SV=3	ENSG00000235715	PSMB8			1.33695	0.0132713	0.139322
+pH fractionation/SP	Q9BUN8	Derlin-1 OS=Homo sapiens OX=9606 GN=DERL1 PE=1 SV=1	ENSG00000136986	DERL1			1.40437	0.0132713	0.139322
+pH fractionation/SP	P12544	Granzyme A OS=Homo sapiens OX=9606 GN=GZMA PE=1 SV=2	ENSG00000145649	GZMA			2.65677	0.013314	0.139395
+pH fractionation/SP	Q93052	Lipoma-preferred partner OS=Homo sapiens OX=9606 GN=LPP PE=1 SV=1	ENSG00000145012	LPP			1.37934	0.0134368	0.140197
+pH fractionation/SP	O43482	Protein Mis18-beta OS=Homo sapiens OX=9606 GN=OIP5 PE=1 SV=2	ENSG00000104147	OIP5			-3.85944	0.0136172	0.141791
+pH fractionation/SP	P51948	CDK-activating kinase assembly factor MAT1 OS=Homo sapiens OX=9606 GN=MNAT1 PE=1 SV=1	ENSG00000020426	MNAT1			-1.40802	0.013715	0.141812
+pH fractionation/SP	P40938	Replication factor C subunit 3 OS=Homo sapiens OX=9606 GN=RFC3 PE=1 SV=2	ENSG00000133119	RFC3			-1.00399	0.0137257	0.141812
-pH fractionation/SP	Q96BY6	Dedicator of cytokinesis protein 10 OS=Homo sapiens OX=9606 GN=DOCK10 PE=1 SV=3	ENSG00000135905	DOCK10			2.07525	0.0137662	0.0694654
+pH fractionation/SP	P0DMV9	Heat shock 70 kDa protein 1B OS=Homo sapiens OX=9606 GN=HSPA1B PE=1 SV=1	ENSG00000232804	HSPA1A; HSPA1B			-1.16795	0.0138263	0.142054
+pH fractionation/SP	P30504	HLA class I histocompatibility antigen, Cw-4 alpha chain OS=Homo sapiens OX=9606 GN=HLA-C PE=1 SV=1		HLA-C			2.13099	0.0138525	0.142054
-pH fractionation/SP	Q9BXW9	Fanconi anemia group D2 protein OS=Homo sapiens OX=9606 GN=FANCD2 PE=1 SV=2	ENSG00000144554	FANCD2			-2.39819	0.0138987	0.0696547
+pH fractionation/SP	O75534-4	Isoform 4 of Cold shock domain-containing protein E1 OS=Homo sapiens OX=9606 GN=CSDE1	ENSG00000009307	CSDE1			-1.17855	0.0139285	0.142059
-pH fractionation/SP	O14949	Cytochrome b-c1 complex subunit 8 OS=Homo sapiens OX=9606 GN=UQCRQ PE=1 SV=4	ENSG00000164405	UQCRQ			-2.28368	0.0139814	0.0696547
+pH fractionation/SP	O95347	Structural maintenance of chromosomes protein 2 OS=Homo sapiens OX=9606 GN=SMC2 PE=1 SV=2	ENSG00000136824	SMC2			-1.34297	0.0139954	0.142059
+pH fractionation/SP	Q96FC9	ATP-dependent DNA helicase DDX11 OS=Homo sapiens OX=9606 GN=DDX11 PE=1 SV=1	ENSG00000013573	DDX11			-2.81261	0.014147	0.143231
+pH fractionation/SP	P10253	Lysosomal alpha-glucosidase OS=Homo sapiens OX=9606 GN=GAA PE=1 SV=4	ENSG00000171298	GAA			1.32267	0.0142111	0.143597
+pH fractionation/SP	P52732	Kinesin-like protein KIF11 OS=Homo sapiens OX=9606 GN=KIF11 PE=1 SV=2	ENSG00000138160	KIF11			-1.42156	0.0145012	0.14597
+pH fractionation/SP	P49356	Protein farnesyltransferase subunit beta OS=Homo sapiens OX=9606 GN=FNTB PE=1 SV=1	ENSG00000257365	FNTB; CHURC1-FNTB			-1.55586	0.014503	0.14597
+pH fractionation/SP	Q969T4	Ubiquitin-conjugating enzyme E2 E3 OS=Homo sapiens OX=9606 GN=UBE2E3 PE=1 SV=1	ENSG00000170035	UBE2E3			-2.25155	0.0146461	0.146721
+pH fractionation/SP	Q9NYF8	Bcl-2-associated transcription factor 1 OS=Homo sapiens OX=9606 GN=BCLAF1 PE=1 SV=2	ENSG00000029363	BCLAF1			-1.32528	0.0146512	0.146721
+pH fractionation/SP	Q9BRS2	Serine/threonine-protein kinase RIO1 OS=Homo sapiens OX=9606 GN=RIOK1 PE=1 SV=2	ENSG00000124784	RIOK1			-1.04128	0.0146921	0.146721
+pH fractionation/SP	P29558	RNA-binding motif, single-stranded-interacting protein 1 OS=Homo sapiens OX=9606 GN=RBMS1 PE=1 SV=3	ENSG00000153250	RBMS1			1.65251	0.01496	0.148527
+pH fractionation/SP	P62380	TATA box-binding protein-like protein 1 OS=Homo sapiens OX=9606 GN=TBPL1 PE=1 SV=1	ENSG00000028839	TBPL1			1.59767	0.0151551	0.14928
+pH fractionation/SP	Q5BJF6	Outer dense fiber protein 2 OS=Homo sapiens OX=9606 GN=ODF2 PE=1 SV=1	ENSG00000136811	ODF2			1.57328	0.0152387	0.14928
+pH fractionation/SP	Q9UBC3-3	Isoform 3 of DNA (cytosine-5)-methyltransferase 3B OS=Homo sapiens OX=9606 GN=DNMT3B	ENSG00000088305	DNMT3B			1.63334	0.0152596	0.14928
+pH fractionation/SP	P42224	Signal transducer and activator of transcription 1-alpha/beta OS=Homo sapiens OX=9606 GN=STAT1 PE=1 SV=2	ENSG00000115415	STAT1			2.67467	0.0152898	0.14928
+pH fractionation/SP	E9PRG8	Uncharacterized protein C11orf98 OS=Homo sapiens OX=9606 GN=C11orf98 PE=4 SV=1	ENSG00000278615	LOC102288414; C11orf98			1.53406	0.015312	0.14928
+pH fractionation/SP	P50402	Emerin OS=Homo sapiens OX=9606 GN=EMD PE=1 SV=1	ENSG00000102119	EMD			-1.35521	0.0153518	0.14928
+pH fractionation/SP	Q8WVV9	Heterogeneous nuclear ribonucleoprotein L-like OS=Homo sapiens OX=9606 GN=HNRNPLL PE=1 SV=1	ENSG00000143889	HNRNPLL; HNRPLL			1.35399	0.0153563	0.14928
+pH fractionation/SP	Q8IUF8	Ribosomal oxygenase 2 OS=Homo sapiens OX=9606 GN=RIOX2 PE=1 SV=1	ENSG00000170854	MINA; RIOX2			-1.26661	0.0154079	0.149497
+pH fractionation/SP	P35914	Hydroxymethylglutaryl-CoA lyase, mitochondrial OS=Homo sapiens OX=9606 GN=HMGCL PE=1 SV=2	ENSG00000117305	HMGCL			1.25872	0.015592	0.150146
+pH fractionation/SP	P08670	Vimentin OS=Homo sapiens OX=9606 GN=VIM PE=1 SV=4	ENSG00000026025	VIM			1.70306	0.0156955	0.150577
+pH fractionation/SP	Q9GZR2	RNA exonuclease 4 OS=Homo sapiens OX=9606 GN=REXO4 PE=1 SV=2	ENSG00000280706	REXO4			1.55966	0.0158555	0.151273
+pH fractionation/SP	Q53FA7	Quinone oxidoreductase PIG3 OS=Homo sapiens OX=9606 GN=TP53I3 PE=1 SV=2	ENSG00000115129	TP53I3			1.0717	0.0159118	0.151273
+pH fractionation/SP	Q14240-2	Isoform 2 of Eukaryotic initiation factor 4A-II OS=Homo sapiens OX=9606 GN=EIF4A2	ENSG00000156976	EIF4A2			1	0.0160173	0.151273
+pH fractionation/SP	P37802-2	Isoform 2 of Transgelin-2 OS=Homo sapiens OX=9606 GN=TAGLN2	ENSG00000158710	TAGLN2			-1.14719	0.0160729	0.151273
+pH fractionation/SP	Q9Y5N6	Origin recognition complex subunit 6 OS=Homo sapiens OX=9606 GN=ORC6 PE=1 SV=1	ENSG00000091651	ORC6			-1.5766	0.0160756	0.151273
+pH fractionation/RefSeq	P41219	peripherin (PRPH), mRNA	ENSG00000135406	PRPH	NM_006262.3_3		2.50549	0.0160929	0.181664
+pH fractionation/SP	O15439	Multidrug resistance-associated protein 4 OS=Homo sapiens OX=9606 GN=ABCC4 PE=1 SV=3	ENSG00000125257	ABCC4			-1.04501	0.0161061	0.151273
+pH fractionation/SP	Q8IV04	Carabin OS=Homo sapiens OX=9606 GN=TBC1D10C PE=1 SV=1	ENSG00000175463	TBC1D10C			1.54853	0.0161103	0.151273
+pH fractionation/SP	Q96GQ7	Probable ATP-dependent RNA helicase DDX27 OS=Homo sapiens OX=9606 GN=DDX27 PE=1 SV=2	ENSG00000124228	DDX27			1.35335	0.0161119	0.151273
+pH fractionation/SP	P30533	Alpha-2-macroglobulin receptor-associated protein OS=Homo sapiens OX=9606 GN=LRPAP1 PE=1 SV=1	ENSG00000163956	LRPAP1			-1.21592	0.0161256	0.151273
+pH fractionation/SP	Q9HBI0	Gamma-parvin OS=Homo sapiens OX=9606 GN=PARVG PE=1 SV=1	ENSG00000138964	PARVG			1.30571	0.0162517	0.151273
+pH fractionation/SP	P51991-2	Isoform 2 of Heterogeneous nuclear ribonucleoprotein A3 OS=Homo sapiens OX=9606 GN=HNRNPA3	ENSG00000170144	HNRNPA3			-3.44712	0.0163117	0.151273
+pH fractionation/SP	Q9Y2Q5	Ragulator complex protein LAMTOR2 OS=Homo sapiens OX=9606 GN=LAMTOR2 PE=1 SV=1	ENSG00000116586	LAMTOR2			1.4573	0.0163286	0.151273
+pH fractionation/SP	Q9BXP5	Serrate RNA effector molecule homolog OS=Homo sapiens OX=9606 GN=SRRT PE=1 SV=1	ENSG00000087087	SRRT			-1.05277	0.016465	0.151372
+pH fractionation/SP	Q96H79	Zinc finger CCCH-type antiviral protein 1-like OS=Homo sapiens OX=9606 GN=ZC3HAV1L PE=1 SV=2	ENSG00000146858	ZC3HAV1L			-1.26561	0.0164698	0.151372
+pH fractionation/SP	P49116	Nuclear receptor subfamily 2 group C member 2 OS=Homo sapiens OX=9606 GN=NR2C2 PE=1 SV=1	ENSG00000177463	NR2C2			1.70638	0.0164827	0.151372
+pH fractionation/SP	Q03164-3	Isoform 3 of Histone-lysine N-methyltransferase 2A OS=Homo sapiens OX=9606 GN=KMT2A	ENSG00000118058	KMT2A; MLL			2.66784	0.0165179	0.151372
+pH fractionation/SP	P04181	Ornithine aminotransferase, mitochondrial OS=Homo sapiens OX=9606 GN=OAT PE=1 SV=1	ENSG00000065154	OAT			-1.13979	0.0165915	0.151372
+pH fractionation/SP	Q00059	Transcription factor A, mitochondrial OS=Homo sapiens OX=9606 GN=TFAM PE=1 SV=1	ENSG00000108064	TFAM			1.21633	0.0166023	0.151372
+pH fractionation/SP	P20839-6	Isoform 6 of Inosine-5'-monophosphate dehydrogenase 1 OS=Homo sapiens OX=9606 GN=IMPDH1	ENSG00000106348	IMPDH1			-1.06502	0.0166039	0.151372
-pH fractionation/SP	O95298	NADH dehydrogenase [ubiquinone] 1 subunit C2 OS=Homo sapiens OX=9606 GN=NDUFC2 PE=1 SV=1	ENSG00000151366	NDUFC2; NDUFC2-KCTD14			-1.14927	0.0167609	0.0763016
-pH fractionation/SP	P38159-2	Isoform 2 of RNA-binding motif protein, X chromosome OS=Homo sapiens OX=9606 GN=RBMX		RBMX			1.03147	0.0167822	0.0763016
+pH fractionation/SP	Q9BVV7	Mitochondrial import inner membrane translocase subunit Tim21 OS=Homo sapiens OX=9606 GN=TIMM21 PE=1 SV=1	ENSG00000075336	TIMM21			-1.01254	0.0169827	0.153038
+pH fractionation/SP	Q14699	Raftlin OS=Homo sapiens OX=9606 GN=RFTN1 PE=1 SV=4	ENSG00000131378	RFTN1			2.02382	0.0170257	0.153038
+pH fractionation/SP	P49005	DNA polymerase delta subunit 2 OS=Homo sapiens OX=9606 GN=POLD2 PE=1 SV=1	ENSG00000106628	POLD2			-2.12726	0.017219	0.153414
+pH fractionation/MAJIQ	P01893	major histocompatibility complex, class I, H (pseudogene) [Source:HGNC Symbol;Acc:HGNC:4965]	ENSG00000206341	HLA-H	ENSG00000206341:s:29857105-29857381_29857381-29896234_L0		1.54766	0.0174902	0.376158
+pH fractionation/SP	Q09328	Alpha-1,6-mannosylglycoprotein 6-beta-N-acetylglucosaminyltransferase A OS=Homo sapiens OX=9606 GN=MGAT5 PE=2 SV=1	ENSG00000152127	MGAT5			2.37898	0.0174972	0.154816
+pH fractionation/SP	O75616	GTPase Era, mitochondrial OS=Homo sapiens OX=9606 GN=ERAL1 PE=1 SV=2	ENSG00000132591	ERAL1			-1.68749	0.0174972	0.154816
+pH fractionation/SP	P06753-2	Isoform 2 of Tropomyosin alpha-3 chain OS=Homo sapiens OX=9606 GN=TPM3	ENSG00000143549	TPM3			1.51326	0.0177258	0.155762
+pH fractionation/SP	O95562	Vesicle transport protein SFT2B OS=Homo sapiens OX=9606 GN=SFT2D2 PE=1 SV=1	ENSG00000213064	SFT2D2			-3.95196	0.0178777	0.156827
+pH fractionation/SP	Q5JSL3	Dedicator of cytokinesis protein 11 OS=Homo sapiens OX=9606 GN=DOCK11 PE=1 SV=2	ENSG00000147251	DOCK11			1.07145	0.0179648	0.157054
+pH fractionation/SP	Q86U38	Nucleolar protein 9 OS=Homo sapiens OX=9606 GN=NOP9 PE=1 SV=1	ENSG00000196943	NOP9			-1.15756	0.0180523	0.157477
+pH fractionation/SP	P25685	DnaJ homolog subfamily B member 1 OS=Homo sapiens OX=9606 GN=DNAJB1 PE=1 SV=4	ENSG00000132002	DNAJB1			-1.20297	0.0182448	0.15841
+pH fractionation/SP	Q05655-2	Isoform 2 of Protein kinase C delta type OS=Homo sapiens OX=9606 GN=PRKCD		PRKCD			-2.6239	0.0183366	0.15868
-pH fractionation/SP	Q7Z3E2	Coiled-coil domain-containing protein 186 OS=Homo sapiens OX=9606 GN=CCDC186 PE=1 SV=2	ENSG00000165813	C10orf118; CCDC186			5.86403	0.0184248	0.0810125
-pH fractionation/SP	Q9HC62	Sentrin-specific protease 2 OS=Homo sapiens OX=9606 GN=SENP2 PE=1 SV=3	ENSG00000163904	SENP2			3.08163	0.0187101	0.0815992
+pH fractionation/SP	Q9H0K6	Pseudouridylate synthase 7 homolog-like protein OS=Homo sapiens OX=9606 GN=PUS7L PE=1 SV=1	ENSG00000129317	PUS7L			-2.25144	0.0187681	0.160516
+pH fractionation/SP	Q5HYJ3	Protein FAM76B OS=Homo sapiens OX=9606 GN=FAM76B PE=1 SV=3	ENSG00000077458	FAM76B			-4.27327	0.0189322	0.160931
+pH fractionation/SP	Q9NVP2	Histone chaperone ASF1B OS=Homo sapiens OX=9606 GN=ASF1B PE=1 SV=1	ENSG00000105011	ASF1B			-2.50851	0.0189784	0.160931
+pH fractionation/SP	Q9H0P0	Cytosolic 5'-nucleotidase 3A OS=Homo sapiens OX=9606 GN=NT5C3A PE=1 SV=3	ENSG00000122643	NT5C3; NT5C3A			1.55503	0.0190489	0.160931
+pH fractionation/SP	Q9NR19-2	Isoform 2 of Acetyl-coenzyme A synthetase, cytoplasmic OS=Homo sapiens OX=9606 GN=ACSS2	ENSG00000131069	ACSS2			2.49892	0.0191558	0.160931
-pH fractionation/SP	O14548	Cytochrome c oxidase subunit 7A-related protein, mitochondrial OS=Homo sapiens OX=9606 GN=COX7A2L PE=1 SV=2	ENSG00000115944	COX7A2L			-2.45966	0.0191699	0.0827117
+pH fractionation/SP	Q9UKW4-4	Isoform 4 of Guanine nucleotide exchange factor VAV3 OS=Homo sapiens OX=9606 GN=VAV3	ENSG00000134215	VAV3			1.45123	0.0191871	0.160931
-pH fractionation/SP	O00762	Ubiquitin-conjugating enzyme E2 C OS=Homo sapiens OX=9606 GN=UBE2C PE=1 SV=1	ENSG00000175063	UBE2C			-4.35804	0.0192118	0.0827836
+pH fractionation/SP	P32455	Guanylate-binding protein 1 OS=Homo sapiens OX=9606 GN=GBP1 PE=1 SV=2	ENSG00000117228	GBP1			2.12674	0.0192312	0.160931
+pH fractionation/SP	O00151	PDZ and LIM domain protein 1 OS=Homo sapiens OX=9606 GN=PDLIM1 PE=1 SV=4	ENSG00000107438	PDLIM1			-1.49268	0.0192895	0.160931
+pH fractionation/SP	Q8TCG1	Protein CIP2A OS=Homo sapiens OX=9606 GN=CIP2A PE=1 SV=2	ENSG00000163507	KIAA1524; CIP2A			-1.40157	0.0193193	0.160931
+pH fractionation/SP	Q15283	Ras GTPase-activating protein 2 OS=Homo sapiens OX=9606 GN=RASA2 PE=1 SV=3		RASA2			1.59094	0.0197102	0.163655
+pH fractionation/SP	O15533-3	Isoform 3 of Tapasin OS=Homo sapiens OX=9606 GN=TAPBP	ENSG00000236490	TAPBP			1.74205	0.0199341	0.164448
+pH fractionation/SP	P41226	Ubiquitin-like modifier-activating enzyme 7 OS=Homo sapiens OX=9606 GN=UBA7 PE=1 SV=2	ENSG00000182179	UBA7			2.86986	0.0200007	0.164732
-pH fractionation/SP	P59768	Guanine nucleotide-binding protein G(I)/G(S)/G(O) subunit gamma-2 OS=Homo sapiens OX=9606 GN=GNG2 PE=1 SV=2	ENSG00000186469	GNG2			3.00841	0.0200224	0.084751
+pH fractionation/SP	P01889	HLA class I histocompatibility antigen, B-7 alpha chain OS=Homo sapiens OX=9606 GN=HLA-B PE=1 SV=3	ENSG00000234745	HLA-B			1.30692	0.0202441	0.165466
+pH fractionation/SP	Q9Y448	Small kinetochore-associated protein OS=Homo sapiens OX=9606 GN=KNSTRN PE=1 SV=2	ENSG00000128944	C15orf23; KNSTRN			-2.42041	0.0202513	0.165466
-pH fractionation/SP	P60903	Protein S100-A10 OS=Homo sapiens OX=9606 GN=S100A10 PE=1 SV=2	ENSG00000197747	S100A10			1.91936	0.0203067	0.0852807
+pH fractionation/RefSeq	P17661	desmin (DES), mRNA	ENSG00000175084	DES	NM_001927.3_2		3.45104	0.0204553	0.19765
+pH fractionation/SP	Q8WX93	Palladin OS=Homo sapiens OX=9606 GN=PALLD PE=1 SV=3		PALLD			-1.00745	0.0205444	0.166797
+pH fractionation/SP	Q9Y3D8	Adenylate kinase isoenzyme 6 OS=Homo sapiens OX=9606 GN=AK6 PE=1 SV=1	ENSG00000085231	AK6; TAF9			-1.34103	0.0207268	0.167059
+pH fractionation/SP	Q9UER7	Death domain-associated protein 6 OS=Homo sapiens OX=9606 GN=DAXX PE=1 SV=2	ENSG00000231617	DAXX			-1.37934	0.0207397	0.167059
-pH fractionation/SP	P08648	Integrin alpha-5 OS=Homo sapiens OX=9606 GN=ITGA5 PE=1 SV=2	ENSG00000161638	ITGA5			2.49763	0.0208169	0.0865963
+pH fractionation/SP	P40306	Proteasome subunit beta type-10 OS=Homo sapiens OX=9606 GN=PSMB10 PE=1 SV=1	ENSG00000205220	PSMB10			1.37321	0.0208306	0.167236
+pH fractionation/SP	Q96JC1	Vam6/Vps39-like protein OS=Homo sapiens OX=9606 GN=VPS39 PE=1 SV=2	ENSG00000166887	VPS39			1.394	0.0208579	0.167236
+pH fractionation/SP	Q15773	Myeloid leukemia factor 2 OS=Homo sapiens OX=9606 GN=MLF2 PE=1 SV=1	ENSG00000089693	MLF2			-1.50867	0.0210728	0.168418
+pH fractionation/SP	Q02809-2	Isoform 2 of Procollagen-lysine,2-oxoglutarate 5-dioxygenase 1 OS=Homo sapiens OX=9606 GN=PLOD1		PLOD1			-2.95944	0.0212811	0.169198
+pH fractionation/MAJIQ		RAB4B-EGLN2 readthrough (NMD candidate) [Source:HGNC Symbol;Acc:HGNC:44465]	ENSG00000171570	RAB4B-EGLN2	ENSG00000171570:s:41292753-41292883_41292883-41306244_L2		1.20172	0.0212916	0.376158
+pH fractionation/RefSeq	O43739	cytohesin 3 (CYTH3), mRNA	ENSG00000008256	CYTH3	NM_004227.3_2		1.7801	0.0212958	0.200813
+pH fractionation/SP	Q9UK76	Jupiter microtubule associated homolog 1 OS=Homo sapiens OX=9606 GN=JPT1 PE=1 SV=3	ENSG00000189159	HN1; JPT1			-1.80379	0.0213791	0.169198
+pH fractionation/SP	Q7Z417	Nuclear fragile X mental retardation-interacting protein 2 OS=Homo sapiens OX=9606 GN=NUFIP2 PE=1 SV=1	ENSG00000108256	NUFIP2			-1.4274	0.0214016	0.169198
+pH fractionation/SP	Q8N0X7	Spartin OS=Homo sapiens OX=9606 GN=SPART PE=1 SV=1	ENSG00000133104	SPG20; SPART			-1.97928	0.0215168	0.169847
-pH fractionation/SP	P01040	Cystatin-A OS=Homo sapiens OX=9606 GN=CSTA PE=1 SV=1	ENSG00000121552	CSTA			1.82118	0.0216359	0.0888741
+pH fractionation/SP	Q53QZ3	Rho GTPase-activating protein 15 OS=Homo sapiens OX=9606 GN=ARHGAP15 PE=1 SV=2	ENSG00000075884	ARHGAP15			1.82118	0.021684	0.170641
-pH fractionation/MAJIQ		ENSG00000228409:s:65217151-65217297 OS=Homo sapiens GN=ENSG00000228409	ENSG00000228409	CCT6P1	ENSG00000228409:s:65217151-65217297_65217297-65219514_L1		-1.16378	0.0219907	0.108796
+pH fractionation/SP	Q9Y618	Nuclear receptor corepressor 2 OS=Homo sapiens OX=9606 GN=NCOR2 PE=1 SV=2		NCOR2			-2.9226	0.0220312	0.172314
+pH fractionation/SP	O94832	Unconventional myosin-Id OS=Homo sapiens OX=9606 GN=MYO1D PE=1 SV=2	ENSG00000176658	MYO1D			1.05447	0.0222884	0.173796
+pH fractionation/SP	Q9Y228	TRAF3-interacting JNK-activating modulator OS=Homo sapiens OX=9606 GN=TRAF3IP3 PE=1 SV=2	ENSG00000009790	TRAF3IP3			2.24813	0.0225245	0.174824
+pH fractionation/SP	Q6P0N0	Mis18-binding protein 1 OS=Homo sapiens OX=9606 GN=MIS18BP1 PE=1 SV=1	ENSG00000129534	MIS18BP1			1.00248	0.0226714	0.174918
+pH fractionation/SP	Q8N0Y2	Zinc finger protein 444 OS=Homo sapiens OX=9606 GN=ZNF444 PE=1 SV=1	ENSG00000167685	ZNF444			1.51119	0.0228306	0.175517
+pH fractionation/SP	P20930	Filaggrin OS=Homo sapiens OX=9606 GN=FLG PE=1 SV=3	ENSG00000143631	FLG			-2.79465	0.0228322	0.175517
+pH fractionation/SP	Q13325	Interferon-induced protein with tetratricopeptide repeats 5 OS=Homo sapiens OX=9606 GN=IFIT5 PE=1 SV=1	ENSG00000152778	IFIT5			4.91231	0.0231135	0.176206
+pH fractionation/SP	Q96RS0	Trimethylguanosine synthase OS=Homo sapiens OX=9606 GN=TGS1 PE=1 SV=3	ENSG00000137574	TGS1			-1.53671	0.0231559	0.176267
+pH fractionation/RefSeq		ATP5J2-PTCD1 readthrough (ATP5J2-PTCD1), mRNA		ATP5J2-PTCD1	NM_001198879.1_3		1.36849	0.0232099	0.205402
+pH fractionation/MAJIQ		FSHD region gene 1 family member B, pseudogene [Source:HGNC Symbol;Acc:HGNC:15792]	ENSG00000149531	FRG1BP	ENSG00000149531:t:29628227-29628331_29625984-29628227_L1		-1.12986	0.0233068	0.379928
+pH fractionation/SP	Q7Z3D6-2	Isoform 2 of D-glutamate cyclase, mitochondrial OS=Homo sapiens OX=9606 GN=DGLUCY	ENSG00000133943	C14orf159; DGLUCY			1.05417	0.0233622	0.176432
+pH fractionation/SP	Q9UL63	Muskelin OS=Homo sapiens OX=9606 GN=MKLN1 PE=1 SV=2	ENSG00000128585	MKLN1			-2.04406	0.0235167	0.176606
-pH fractionation/SP	Q9UG22	GTPase IMAP family member 2 OS=Homo sapiens OX=9606 GN=GIMAP2 PE=1 SV=2	ENSG00000106560	GIMAP2			2.14619	0.023536	0.0939043
+pH fractionation/SP	Q9NTJ3	Structural maintenance of chromosomes protein 4 OS=Homo sapiens OX=9606 GN=SMC4 PE=1 SV=2	ENSG00000113810	SMC4			-1.25233	0.0235797	0.176606
+pH fractionation/SP	P09884	DNA polymerase alpha catalytic subunit OS=Homo sapiens OX=9606 GN=POLA1 PE=1 SV=2	ENSG00000101868	POLA1			-4.10245	0.0237335	0.177125
+pH fractionation/SP	P36873-2	Isoform 2 of Serine/threonine-protein phosphatase PP1-gamma catalytic subunit OS=Homo sapiens OX=9606 GN=PPP1CC	ENSG00000186298	PPP1CC			-1.59555	0.0237527	0.177125
+pH fractionation/SP	P61073-2	Isoform 2 of C-X-C chemokine receptor type 4 OS=Homo sapiens OX=9606 GN=CXCR4	ENSG00000121966	CXCR4			-4.64029	0.023796	0.17719
+pH fractionation/MAJIQ	Q9NYL2	mitogen-activated protein kinase kinase kinase 20 [Source:HGNC Symbol;Acc:HGNC:17797]	ENSG00000091436	MAP3K20	ENSG00000091436:s:174081843-174081982_174081978-174085878_L1		-1.48318	0.0239544	0.379928
+pH fractionation/SP	Q15014	Mortality factor 4-like protein 2 OS=Homo sapiens OX=9606 GN=MORF4L2 PE=1 SV=1	ENSG00000123562	MORF4L2			-2.15955	0.0241631	0.178626
-pH fractionation/SP	O14545	TRAF-type zinc finger domain-containing protein 1 OS=Homo sapiens OX=9606 GN=TRAFD1 PE=1 SV=1	ENSG00000135148	TRAFD1			1.14031	0.0242129	0.0949749
+pH fractionation/SP	O75410-2	Isoform 2 of Transforming acidic coiled-coil-containing protein 1 OS=Homo sapiens OX=9606 GN=TACC1		TACC1			-2.62169	0.0243675	0.1798
+pH fractionation/SP	Q9H7E9-2	Isoform 2 of UPF0488 protein C8orf33 OS=Homo sapiens OX=9606 GN=C8orf33		C8orf33			-3.40811	0.0243921	0.1798
+pH fractionation/SP	P07947	Tyrosine-protein kinase Yes OS=Homo sapiens OX=9606 GN=YES1 PE=1 SV=3	ENSG00000176105	YES1			1.50249	0.0244868	0.179841
+pH fractionation/SP	Q6NUQ1	RAD50-interacting protein 1 OS=Homo sapiens OX=9606 GN=RINT1 PE=1 SV=1	ENSG00000135249	RINT1			-1.02729	0.0245824	0.179841
+pH fractionation/SP	P20336	Ras-related protein Rab-3A OS=Homo sapiens OX=9606 GN=RAB3A PE=1 SV=1	ENSG00000105649	RAB3A			-2.67522	0.0246933	0.179841
+pH fractionation/SP	Q12882	Dihydropyrimidine dehydrogenase [NADP(+)] OS=Homo sapiens OX=9606 GN=DPYD PE=1 SV=2	ENSG00000188641	DPYD			1.93087	0.0248898	0.179841
+pH fractionation/SP	Q8IWD4	Coiled-coil domain-containing protein 117 OS=Homo sapiens OX=9606 GN=CCDC117 PE=1 SV=1	ENSG00000159873	CCDC117			-2.5195	0.0249073	0.179841
+pH fractionation/SP	P30613	Pyruvate kinase PKLR OS=Homo sapiens OX=9606 GN=PKLR PE=1 SV=2	ENSG00000143627	PKLR			2.56657	0.0250604	0.179841
+pH fractionation/SP	P80404	4-aminobutyrate aminotransferase, mitochondrial OS=Homo sapiens OX=9606 GN=ABAT PE=1 SV=3	ENSG00000183044	ABAT			2.16077	0.0252105	0.180634
+pH fractionation/SP	Q8NDX1	PH and SEC7 domain-containing protein 4 OS=Homo sapiens OX=9606 GN=PSD4 PE=1 SV=2	ENSG00000125637	PSD4			2.59528	0.025257	0.180713
+pH fractionation/SP	P17544	Cyclic AMP-dependent transcription factor ATF-7 OS=Homo sapiens OX=9606 GN=ATF7 PE=1 SV=2	ENSG00000170653	ATF7			3.19565	0.0253029	0.180713
+pH fractionation/SP	Q9H1Z4	WD repeat-containing protein 13 OS=Homo sapiens OX=9606 GN=WDR13 PE=1 SV=2		WDR13			1.50922	0.0253273	0.180713
+pH fractionation/SP	Q9BTV5	Fibronectin type III and SPRY domain-containing protein 1 OS=Homo sapiens OX=9606 GN=FSD1 PE=1 SV=1	ENSG00000105255	FSD1			-1.20049	0.0256523	0.181537
+pH fractionation/SP	Q96EK7	Constitutive coactivator of peroxisome proliferator-activated receptor gamma OS=Homo sapiens OX=9606 GN=FAM120B PE=1 SV=1	ENSG00000275333	FAM120B			1.34967	0.0256908	0.181537
-pH fractionation/SP	P54687	Branched-chain-amino-acid aminotransferase, cytosolic OS=Homo sapiens OX=9606 GN=BCAT1 PE=1 SV=3	ENSG00000060982	BCAT1			2.10005	0.0258138	0.097829
+pH fractionation/SP	Q96EV8	Dysbindin OS=Homo sapiens OX=9606 GN=DTNBP1 PE=1 SV=1	ENSG00000047579	DTNBP1			-1.73048	0.0258701	0.182301
+pH fractionation/SP	P35269	General transcription factor IIF subunit 1 OS=Homo sapiens OX=9606 GN=GTF2F1 PE=1 SV=2	ENSG00000125651	GTF2F1			-1.29567	0.0262413	0.183904
+pH fractionation/SP	Q8TF05	Serine/threonine-protein phosphatase 4 regulatory subunit 1 OS=Homo sapiens OX=9606 GN=PPP4R1 PE=1 SV=1	ENSG00000154845	PPP4R1			2.06933	0.0263935	0.184718
+pH fractionation/SP	O00257	E3 SUMO-protein ligase CBX4 OS=Homo sapiens OX=9606 GN=CBX4 PE=1 SV=3	ENSG00000141582	CBX4			4.69102	0.0265202	0.185352
+pH fractionation/SP	Q8WUA2	Peptidyl-prolyl cis-trans isomerase-like 4 OS=Homo sapiens OX=9606 GN=PPIL4 PE=1 SV=1	ENSG00000131013	PPIL4			-1.26424	0.0266538	0.186032
+pH fractionation/MAJIQ		guanylate binding protein 1 pseudogene 1 [Source:HGNC Symbol;Acc:HGNC:39561]	ENSG00000225492	GBP1P1	ENSG00000225492:t:89885750-89885877_89876067-89885750_S1		2.12007	0.0266615	0.400633
+pH fractionation/SP	O75648	Mitochondrial tRNA-specific 2-thiouridylase 1 OS=Homo sapiens OX=9606 GN=TRMU PE=1 SV=2	ENSG00000100416	TRMU			-1.78084	0.0267171	0.18622
+pH fractionation/RefSeq	Q8IW45	NAD(P)HX dehydratase (NAXD), transcript variant 1, mRNA	ENSG00000213995	NAXD	NM_018210.3_1		1.25215	0.0271593	0.216127
+pH fractionation/SP	Q12907	Vesicular integral-membrane protein VIP36 OS=Homo sapiens OX=9606 GN=LMAN2 PE=1 SV=1	ENSG00000169223	LMAN2			1.04219	0.0271741	0.188208
+pH fractionation/SP	Q13427	Peptidyl-prolyl cis-trans isomerase G OS=Homo sapiens OX=9606 GN=PPIG PE=1 SV=2	ENSG00000138398	PPIG			-1.32059	0.0273302	0.188208
+pH fractionation/SP	Q12931	Heat shock protein 75 kDa, mitochondrial OS=Homo sapiens OX=9606 GN=TRAP1 PE=1 SV=3	ENSG00000126602	TRAP1			-1.57302	0.0274381	0.188208
+pH fractionation/SP	O94888	UBX domain-containing protein 7 OS=Homo sapiens OX=9606 GN=UBXN7 PE=1 SV=2	ENSG00000163960	UBXN7			-1.16031	0.0274546	0.188208
+pH fractionation/SP	Q96B97	SH3 domain-containing kinase-binding protein 1 OS=Homo sapiens OX=9606 GN=SH3KBP1 PE=1 SV=2	ENSG00000147010	SH3KBP1			1.28575	0.027542	0.188208
-pH fractionation/RefSeq		Homo sapiens small nuclear ribonucleoprotein U11/U12 subunit 48 (SNRNP48), mRNA		SNRNP48	NM_152551.3_2		-1.02877	0.0276675	0.0978796
+pH fractionation/SP	Q13454	Tumor suppressor candidate 3 OS=Homo sapiens OX=9606 GN=TUSC3 PE=1 SV=1	ENSG00000104723	TUSC3			1.51278	0.0276696	0.188208
+pH fractionation/SP	Q9H467	CUE domain-containing protein 2 OS=Homo sapiens OX=9606 GN=CUEDC2 PE=1 SV=1	ENSG00000107874	CUEDC2			-2.16116	0.0277688	0.188208
+pH fractionation/SP	Q8IUH4	Palmitoyltransferase ZDHHC13 OS=Homo sapiens OX=9606 GN=ZDHHC13 PE=1 SV=3	ENSG00000177054	ZDHHC13			-1.03352	0.0278293	0.188208
+pH fractionation/RefSeq	Q86Y56	dynein axonemal assembly factor 5 (DNAAF5), transcript variant 1, mRNA	ENSG00000164818	DNAAF5	NM_017802.3_2		-1.43064	0.0278415	0.216127
+pH fractionation/SP	O75419-3	Isoform 3 of Cell division control protein 45 homolog OS=Homo sapiens OX=9606 GN=CDC45	ENSG00000093009	CDC45			-2.23192	0.027884	0.188208
+pH fractionation/SP	P51159	Ras-related protein Rab-27A OS=Homo sapiens OX=9606 GN=RAB27A PE=1 SV=3	ENSG00000069974	RAB27A			1.35336	0.0282388	0.18897
+pH fractionation/SP	Q02790	Peptidyl-prolyl cis-trans isomerase FKBP4 OS=Homo sapiens OX=9606 GN=FKBP4 PE=1 SV=3	ENSG00000004478	FKBP4			-1.17508	0.0282457	0.18897
+pH fractionation/SP	Q9Y312	Protein AAR2 homolog OS=Homo sapiens OX=9606 GN=AAR2 PE=1 SV=2	ENSG00000131043	AAR2			-1.00304	0.0282551	0.18897
+pH fractionation/SP	Q9NXX6	Non-structural maintenance of chromosomes element 4 homolog A OS=Homo sapiens OX=9606 GN=NSMCE4A PE=1 SV=2	ENSG00000107672	NSMCE4A			2.13788	0.0284039	0.18961
+pH fractionation/SP	Q7Z6A9	B- and T-lymphocyte attenuator OS=Homo sapiens OX=9606 GN=BTLA PE=1 SV=3	ENSG00000186265	BTLA			4.24694	0.028443	0.18961
+pH fractionation/RefSeq	Q9Y6M1	insulin like growth factor 2 mRNA binding protein 2 (IGF2BP2), transcript variant 3, mRNA	ENSG00000073792	IGF2BP2	NM_001291869.2_3		1.85124	0.0285072	0.216127
+pH fractionation/SP	Q8WUM9	Sodium-dependent phosphate transporter 1 OS=Homo sapiens OX=9606 GN=SLC20A1 PE=1 SV=1	ENSG00000144136	SLC20A1			-1.13806	0.0287569	0.19068
-pH fractionation/SP	O95817	BAG family molecular chaperone regulator 3 OS=Homo sapiens OX=9606 GN=BAG3 PE=1 SV=3	ENSG00000151929	BAG3			1.45738	0.0290996	0.105725
+pH fractionation/SP	Q8WXX5	DnaJ homolog subfamily C member 9 OS=Homo sapiens OX=9606 GN=DNAJC9 PE=1 SV=1	ENSG00000213551	DNAJC9			-1.09473	0.0291649	0.192541
+pH fractionation/SP	P15586	N-acetylglucosamine-6-sulfatase OS=Homo sapiens OX=9606 GN=GNS PE=1 SV=3	ENSG00000135677	GNS			1.68888	0.0292215	0.192555
+pH fractionation/SP	Q15645	Pachytene checkpoint protein 2 homolog OS=Homo sapiens OX=9606 GN=TRIP13 PE=1 SV=2	ENSG00000071539	TRIP13			-1.17522	0.0292421	0.192555
+pH fractionation/SP	P49643	DNA primase large subunit OS=Homo sapiens OX=9606 GN=PRIM2 PE=1 SV=2	ENSG00000146143	PRIM2			-1.6248	0.0293339	0.192911
-pH fractionation/SP	P62072	Mitochondrial import inner membrane translocase subunit Tim10 OS=Homo sapiens OX=9606 GN=TIMM10 PE=1 SV=1	ENSG00000134809	TIMM10			-1.23666	0.0293633	0.106061
+pH fractionation/SP	Q9UN86-2	Isoform B of Ras GTPase-activating protein-binding protein 2 OS=Homo sapiens OX=9606 GN=G3BP2	ENSG00000138757	G3BP2			-1.747	0.0294867	0.193279
-pH fractionation/SP	Q8TAD7	Overexpressed in colon carcinoma 1 protein OS=Homo sapiens OX=9606 GN=OCC1 PE=1 SV=2	ENSG00000235162	C12orf75			1.93132	0.0297623	0.106871
+pH fractionation/RefSeq	Q9BWF2	TRAF interacting protein (TRAIP), mRNA	ENSG00000183763	TRAIP	NM_005879.2_1		1.42667	0.0298108	0.219859
-pH fractionation/MAJIQ		ENSG00000186300:t:2852378-2860482 OS=Homo sapiens GN=ENSG00000186300	ENSG00000186300	ZNF555	ENSG00000186300:t:2852378-2860482_2851649-2852378_L2		-1.14136	0.0298741	0.12944
+pH fractionation/SP	Q9NWT1	p21-activated protein kinase-interacting protein 1 OS=Homo sapiens OX=9606 GN=PAK1IP1 PE=1 SV=2	ENSG00000111845	PAK1IP1			1.87798	0.0301056	0.195686
+pH fractionation/SP	Q95604	HLA class I histocompatibility antigen, Cw-17 alpha chain OS=Homo sapiens OX=9606 GN=HLA-C PE=1 SV=1		HLA-C			2.71249	0.0301107	0.195686
-pH fractionation/SP	Q9NUL5	Repressor of yield of DENV protein OS=Homo sapiens OX=9606 GN=RYDEN PE=1 SV=2	ENSG00000130813	C19orf66			2.3527	0.030199	0.10799
+pH fractionation/SP	Q6P4I2	WD repeat-containing protein 73 OS=Homo sapiens OX=9606 GN=WDR73 PE=1 SV=1	ENSG00000177082	WDR73			-2.43471	0.030205	0.195873
+pH fractionation/SP	Q56P03	E2F-associated phosphoprotein OS=Homo sapiens OX=9606 GN=EAPP PE=1 SV=4	ENSG00000129518	EAPP			-1.9585	0.030466	0.197067
+pH fractionation/SP	Q9NSI8-3	Isoform 3 of SAM domain-containing protein SAMSN-1 OS=Homo sapiens OX=9606 GN=SAMSN1	ENSG00000155307	SAMSN1			1.66431	0.0305059	0.197076
+pH fractionation/SP	Q14669-2	Isoform 2 of E3 ubiquitin-protein ligase TRIP12 OS=Homo sapiens OX=9606 GN=TRIP12		TRIP12			2.76988	0.0308817	0.198503
+pH fractionation/SP	Q13685	Angio-associated migratory cell protein OS=Homo sapiens OX=9606 GN=AAMP PE=1 SV=2	ENSG00000127837	AAMP			-1.4745	0.0310015	0.199023
+pH fractionation/SP	Q8N4T8	Carbonyl reductase family member 4 OS=Homo sapiens OX=9606 GN=CBR4 PE=1 SV=3	ENSG00000145439	CBR4			1.21198	0.0312669	0.199975
+pH fractionation/RefSeq	O94760	dimethylarginine dimethylaminohydrolase 1 (DDAH1), transcript variant 1, mRNA	ENSG00000153904	DDAH1	NM_012137.3_2		1.69173	0.0315059	0.227618
-pH fractionation/SP	Q9Y2D5-4	Isoform 3 of A-kinase anchor protein 2 OS=Homo sapiens OX=9606 GN=AKAP2	ENSG00000157654	PALM2-AKAP2; PALM2; AKAP2			-1.15887	0.0315307	0.11046
+pH fractionation/SP	Q9UNS1	Protein timeless homolog OS=Homo sapiens OX=9606 GN=TIMELESS PE=1 SV=2	ENSG00000111602	TIMELESS			-1.63302	0.0316668	0.201027
+pH fractionation/MAJIQ	Q9NRH3	tubulin gamma 2 [Source:HGNC Symbol;Acc:HGNC:12419]	ENSG00000037042	TUBG2	ENSG00000037042:s:40812657-40813409_40812725-40815395_S0		-2.47194	0.0317465	0.441708
+pH fractionation/SP	P01130	Low-density lipoprotein receptor OS=Homo sapiens OX=9606 GN=LDLR PE=1 SV=1	ENSG00000130164	LDLR			-2.72758	0.0318548	0.201971
+pH fractionation/SP	Q92979	Ribosomal RNA small subunit methyltransferase NEP1 OS=Homo sapiens OX=9606 GN=EMG1 PE=1 SV=4	ENSG00000126749	EMG1			-1.33831	0.0320741	0.20305
+pH fractionation/SP	O00541	Pescadillo homolog OS=Homo sapiens OX=9606 GN=PES1 PE=1 SV=1	ENSG00000100029	PES1			-1.12448	0.0323276	0.203339
+pH fractionation/SP	Q06609	DNA repair protein RAD51 homolog 1 OS=Homo sapiens OX=9606 GN=RAD51 PE=1 SV=1	ENSG00000051180	RAD51			-1.59252	0.0323662	0.203339
+pH fractionation/SP	O75934	Pre-mRNA-splicing factor SPF27 OS=Homo sapiens OX=9606 GN=BCAS2 PE=1 SV=1	ENSG00000116752	BCAS2			-1.19649	0.0324543	0.203339
+pH fractionation/RefSeq	A6NED2	RCC1 domain containing 1 (RCCD1), transcript variant 1, mRNA	ENSG00000166965	RCCD1	NM_033544.2_1		-2.08615	0.0324881	0.230516
+pH fractionation/RefSeq	O00562	phosphatidylinositol transfer protein membrane associated 1 (PITPNM1), transcript variant 1, mRNA	ENSG00000110697	PITPNM1	NM_004910.2_1		1.66235	0.032496	0.230516
+pH fractionation/SP	O15067	Phosphoribosylformylglycinamidine synthase OS=Homo sapiens OX=9606 GN=PFAS PE=1 SV=4	ENSG00000178921	PFAS			-1.20131	0.0325469	0.203339
+pH fractionation/SP	P04818	Thymidylate synthase OS=Homo sapiens OX=9606 GN=TYMS PE=1 SV=3	ENSG00000176890	TYMS			-2.36612	0.0327094	0.203713
+pH fractionation/SP	Q6IAN0	Dehydrogenase/reductase SDR family member 7B OS=Homo sapiens OX=9606 GN=DHRS7B PE=1 SV=2	ENSG00000109016	DHRS7B			-2.89638	0.0327262	0.203713
+pH fractionation/SP	Q9NQW6	Anillin OS=Homo sapiens OX=9606 GN=ANLN PE=1 SV=2	ENSG00000011426	ANLN			-2.00143	0.0329021	0.204394
+pH fractionation/SP	Q99490-2	Isoform 2 of Arf-GAP with GTPase, ANK repeat and PH domain-containing protein 2 OS=Homo sapiens OX=9606 GN=AGAP2	ENSG00000135439	AGAP2			2.6283	0.0330651	0.205076
+pH fractionation/SP	Q9HAV7	GrpE protein homolog 1, mitochondrial OS=Homo sapiens OX=9606 GN=GRPEL1 PE=1 SV=2	ENSG00000109519	GRPEL1			-1.18415	0.033107	0.205087
+pH fractionation/SP	Q9NRG4	N-lysine methyltransferase SMYD2 OS=Homo sapiens OX=9606 GN=SMYD2 PE=1 SV=2	ENSG00000143499	SMYD2			-2.51245	0.0332256	0.205275
+pH fractionation/SP	Q9H3C7	Gametogenetin-binding protein 2 OS=Homo sapiens OX=9606 GN=GGNBP2 PE=1 SV=1	ENSG00000275099	GGNBP2			-1.11685	0.0332686	0.205275
+pH fractionation/SP	P62256	Ubiquitin-conjugating enzyme E2 H OS=Homo sapiens OX=9606 GN=UBE2H PE=1 SV=1	ENSG00000186591	UBE2H			1.98225	0.0333497	0.205275
+pH fractionation/SP	Q92674	Centromere protein I OS=Homo sapiens OX=9606 GN=CENPI PE=1 SV=2	ENSG00000102384	CENPI			1.65763	0.0334789	0.205275
+pH fractionation/SP	Q8N6H7	ADP-ribosylation factor GTPase-activating protein 2 OS=Homo sapiens OX=9606 GN=ARFGAP2 PE=1 SV=1	ENSG00000149182	ARFGAP2			-1.50153	0.0334908	0.205275
+pH fractionation/SP	Q12846	Syntaxin-4 OS=Homo sapiens OX=9606 GN=STX4 PE=1 SV=2	ENSG00000103496	STX4			1.08817	0.0339558	0.206526
+pH fractionation/SP	O14773	Tripeptidyl-peptidase 1 OS=Homo sapiens OX=9606 GN=TPP1 PE=1 SV=2	ENSG00000166340	TPP1			1.10303	0.033979	0.206526
+pH fractionation/RefSeq	Q9Y6X2	protein inhibitor of activated STAT 3 (PIAS3), mRNA	ENSG00000131788	PIAS3	NM_006099.3_1		-1.60794	0.0341085	0.236851
+pH fractionation/SP	Q9Y3X0	Coiled-coil domain-containing protein 9 OS=Homo sapiens OX=9606 GN=CCDC9 PE=1 SV=1	ENSG00000105321	CCDC9			1.27817	0.0342599	0.207463
-pH fractionation/SP	Q9BYV8	Centrosomal protein of 41 kDa OS=Homo sapiens OX=9606 GN=CEP41 PE=1 SV=1	ENSG00000106477	CEP41			2.9073	0.0346917	0.115242
+pH fractionation/SP	Q9H410	Kinetochore-associated protein DSN1 homolog OS=Homo sapiens OX=9606 GN=DSN1 PE=1 SV=2	ENSG00000149636	DSN1			-1.34108	0.0347373	0.20961
-pH fractionation/SP	O95182	NADH dehydrogenase [ubiquinone] 1 alpha subcomplex subunit 7 OS=Homo sapiens OX=9606 GN=NDUFA7 PE=1 SV=3	ENSG00000267855	NDUFA7			-2.01905	0.0347394	0.115242
+pH fractionation/SP	Q8IW45-2	Isoform 2 of ATP-dependent (S)-NAD(P)H-hydrate dehydratase OS=Homo sapiens OX=9606 GN=NAXD	ENSG00000213995	CARKD; NAXD			1.24265	0.0351615	0.210702
+pH fractionation/SP	Q99633	Pre-mRNA-splicing factor 18 OS=Homo sapiens OX=9606 GN=PRPF18 PE=1 SV=1	ENSG00000165630	PRPF18			-1.57042	0.0354678	0.211081
+pH fractionation/SP	Q03519	Antigen peptide transporter 2 OS=Homo sapiens OX=9606 GN=TAP2 PE=1 SV=1	ENSG00000204267	TAP2			1.48605	0.0354754	0.211081
+pH fractionation/SP	Q6ZUM4	Rho GTPase-activating protein 27 OS=Homo sapiens OX=9606 GN=ARHGAP27 PE=1 SV=3	ENSG00000159314	ARHGAP27			2.15724	0.0357122	0.211263
+pH fractionation/SP	Q9UHI6	Probable ATP-dependent RNA helicase DDX20 OS=Homo sapiens OX=9606 GN=DDX20 PE=1 SV=2	ENSG00000064703	DDX20			-1.91282	0.035977	0.212584
+pH fractionation/SP	P49069	Calcium signal-modulating cyclophilin ligand OS=Homo sapiens OX=9606 GN=CAMLG PE=1 SV=1	ENSG00000164615	CAMLG			-1.27064	0.0361593	0.213153
+pH fractionation/SP	Q13557-11	Isoform Delta 11 of Calcium/calmodulin-dependent protein kinase type II subunit delta OS=Homo sapiens OX=9606 GN=CAMK2D		CAMK2D			1.10062	0.0364511	0.21352
+pH fractionation/SP	P62633-4	Isoform 4 of Cellular nucleic acid-binding protein OS=Homo sapiens OX=9606 GN=CNBP	ENSG00000169714	CNBP			-1.88761	0.0365626	0.21352
+pH fractionation/MAJIQ	P01893	major histocompatibility complex, class I, H (pseudogene) [Source:HGNC Symbol;Acc:HGNC:4965]	ENSG00000206341	HLA-H	ENSG00000206341:s:29856244-29857081_29856519-29911899_L2		1.2081	0.0365735	0.470207
+pH fractionation/SP	P30414	NK-tumor recognition protein OS=Homo sapiens OX=9606 GN=NKTR PE=1 SV=2	ENSG00000114857	NKTR			2.30453	0.036602	0.21352
+pH fractionation/SP	Q9NZB2-6	Isoform F of Constitutive coactivator of PPAR-gamma-like protein 1 OS=Homo sapiens OX=9606 GN=FAM120A		FAM120A			-1.04086	0.0366667	0.21352
+pH fractionation/SP	Q9UG63-2	Isoform 2 of ATP-binding cassette sub-family F member 2 OS=Homo sapiens OX=9606 GN=ABCF2	ENSG00000033050	ABCF2			-1.11444	0.0366772	0.21352
+pH fractionation/RefSeq	Q9NZM5	NOP53 ribosome biogenesis factor (NOP53), mRNA	ENSG00000105373	NOP53	NM_015710.4_3		1.30726	0.0368373	0.242303
+pH fractionation/SP	Q00341	Vigilin OS=Homo sapiens OX=9606 GN=HDLBP PE=1 SV=2		HDLBP			-1.04901	0.0370539	0.21498
+pH fractionation/SP	O75787	Renin receptor OS=Homo sapiens OX=9606 GN=ATP6AP2 PE=1 SV=2	ENSG00000182220	ATP6AP2			-1.53351	0.0372362	0.215306
+pH fractionation/SP	Q9Y6K1	DNA (cytosine-5)-methyltransferase 3A OS=Homo sapiens OX=9606 GN=DNMT3A PE=1 SV=4	ENSG00000119772	DNMT3A			1.79854	0.0376407	0.21691
+pH fractionation/SP	Q8TED0	U3 small nucleolar RNA-associated protein 15 homolog OS=Homo sapiens OX=9606 GN=UTP15 PE=1 SV=3	ENSG00000164338	UTP15			1.22187	0.037752	0.217124
+pH fractionation/SP	P67809	Nuclease-sensitive element-binding protein 1 OS=Homo sapiens OX=9606 GN=YBX1 PE=1 SV=3	ENSG00000065978	YBX1			-1.2711	0.0377979	0.217124
+pH fractionation/SP	Q15361	Transcription termination factor 1 OS=Homo sapiens OX=9606 GN=TTF1 PE=1 SV=3	ENSG00000125482	TTF1			1.30294	0.0378663	0.217124
-pH fractionation/SP	Q9Y3P8	Signaling threshold-regulating transmembrane adapter 1 OS=Homo sapiens OX=9606 GN=SIT1 PE=1 SV=1	ENSG00000137078	SIT1			3.81976	0.037883	0.121276
+pH fractionation/SP	Q8N543	Prolyl 3-hydroxylase OGFOD1 OS=Homo sapiens OX=9606 GN=OGFOD1 PE=1 SV=1	ENSG00000087263	OGFOD1			-1.8947	0.0378898	0.217124
+pH fractionation/SP	O00746	Nucleoside diphosphate kinase, mitochondrial OS=Homo sapiens OX=9606 GN=NME4 PE=1 SV=1	ENSG00000103202	NME4			-1.43315	0.0381424	0.218025
+pH fractionation/SP	Q9UPR3	Protein SMG5 OS=Homo sapiens OX=9606 GN=SMG5 PE=1 SV=3	ENSG00000198952	SMG5			-1.88306	0.0381529	0.218025
+pH fractionation/SP	Q5QJE6	Deoxynucleotidyltransferase terminal-interacting protein 2 OS=Homo sapiens OX=9606 GN=DNTTIP2 PE=1 SV=2	ENSG00000067334	DNTTIP2			-1.15721	0.0382172	0.218025
+pH fractionation/SP	P16278	Beta-galactosidase OS=Homo sapiens OX=9606 GN=GLB1 PE=1 SV=2		GLB1			1.41474	0.0385883	0.21864
+pH fractionation/SP	Q06136	3-ketodihydrosphingosine reductase OS=Homo sapiens OX=9606 GN=KDSR PE=1 SV=1	ENSG00000119537	KDSR			1.5281	0.0386121	0.21864
+pH fractionation/SP	Q6PD74	Alpha- and gamma-adaptin-binding protein p34 OS=Homo sapiens OX=9606 GN=AAGAB PE=1 SV=1	ENSG00000103591	AAGAB			-1.03229	0.0387854	0.218727
+pH fractionation/SP	P33993	DNA replication licensing factor MCM7 OS=Homo sapiens OX=9606 GN=MCM7 PE=1 SV=4	ENSG00000166508	MCM7			-1.13457	0.0388098	0.218727
+pH fractionation/SP	Q14966	Zinc finger protein 638 OS=Homo sapiens OX=9606 GN=ZNF638 PE=1 SV=2	ENSG00000075292	ZNF638			1.08171	0.0389467	0.218776
+pH fractionation/SP	Q9H0E2	Toll-interacting protein OS=Homo sapiens OX=9606 GN=TOLLIP PE=1 SV=1	ENSG00000078902	TOLLIP			1.14724	0.0391184	0.218878
+pH fractionation/SP	O75554	WW domain-binding protein 4 OS=Homo sapiens OX=9606 GN=WBP4 PE=1 SV=1	ENSG00000120688	WBP4			-2.18896	0.0391358	0.218878
-pH fractionation/SP	P28799	Granulins OS=Homo sapiens OX=9606 GN=GRN PE=1 SV=2	ENSG00000030582	GRN			2.27836	0.0392455	0.123757
+pH fractionation/MAJIQ	P51965	ubiquitin conjugating enzyme E2 E1 [Source:HGNC Symbol;Acc:HGNC:12477]	ENSG00000170142	UBE2E1	ENSG00000170142:t:23929058-23929280_23853001-23929058_L0		-1.43094	0.0393087	0.48383
+pH fractionation/SP	P41214	Eukaryotic translation initiation factor 2D OS=Homo sapiens OX=9606 GN=EIF2D PE=1 SV=3	ENSG00000143486	EIF2D			-1.1618	0.0394709	0.219235
+pH fractionation/SP	O14646	Chromodomain-helicase-DNA-binding protein 1 OS=Homo sapiens OX=9606 GN=CHD1 PE=1 SV=2	ENSG00000153922	CHD1			-1.00897	0.0395528	0.219295
+pH fractionation/SP	Q9UIF9	Bromodomain adjacent to zinc finger domain protein 2A OS=Homo sapiens OX=9606 GN=BAZ2A PE=1 SV=4	ENSG00000076108	BAZ2A			1.91078	0.0397171	0.219697
+pH fractionation/SP	O94788	Retinal dehydrogenase 2 OS=Homo sapiens OX=9606 GN=ALDH1A2 PE=1 SV=3	ENSG00000128918	ALDH1A2			1.18121	0.0400266	0.220172
+pH fractionation/SP	P61769	Beta-2-microglobulin OS=Homo sapiens OX=9606 GN=B2M PE=1 SV=1	ENSG00000273686	B2M			1.51271	0.0401072	0.220172
+pH fractionation/SP	P08047	Transcription factor Sp1 OS=Homo sapiens OX=9606 GN=SP1 PE=1 SV=3	ENSG00000185591	SP1			-1.14563	0.0401325	0.220172
+pH fractionation/SP	P62834	Ras-related protein Rap-1A OS=Homo sapiens OX=9606 GN=RAP1A PE=1 SV=1	ENSG00000116473	RAP1A			5.70822	0.0402303	0.220428
+pH fractionation/SP	Q9HB19	Pleckstrin homology domain-containing family A member 2 OS=Homo sapiens OX=9606 GN=PLEKHA2 PE=1 SV=2		PLEKHA2			1.37622	0.0403007	0.220577
+pH fractionation/SP	O75794	Cell division cycle protein 123 homolog OS=Homo sapiens OX=9606 GN=CDC123 PE=1 SV=1	ENSG00000151465	CDC123			-1.47512	0.0403659	0.220699
-pH fractionation/SP	O43678	NADH dehydrogenase [ubiquinone] 1 alpha subcomplex subunit 2 OS=Homo sapiens OX=9606 GN=NDUFA2 PE=1 SV=3	ENSG00000131495	NDUFA2			-1.25998	0.0406247	0.125917
+pH fractionation/SP	Q9UI26-2	Isoform 2 of Importin-11 OS=Homo sapiens OX=9606 GN=IPO11	ENSG00000086200	IPO11			-1.62756	0.0410785	0.222524
+pH fractionation/SP	Q5JUR7	Testis-expressed protein 30 OS=Homo sapiens OX=9606 GN=TEX30 PE=2 SV=1	ENSG00000151287	TEX30			-1.26488	0.041241	0.222524
+pH fractionation/SP	P16284	Platelet endothelial cell adhesion molecule OS=Homo sapiens OX=9606 GN=PECAM1 PE=1 SV=2		PECAM1			2.9867	0.0414687	0.222524
+pH fractionation/SP	P18615	Negative elongation factor E OS=Homo sapiens OX=9606 GN=NELFE PE=1 SV=3	ENSG00000204356	NELFE; RDBP			-1.42523	0.0414832	0.222524
+pH fractionation/SP	O00214-2	Isoform 2 of Galectin-8 OS=Homo sapiens OX=9606 GN=LGALS8	ENSG00000116977	LGALS8			1.61323	0.0415747	0.222524
+pH fractionation/SP	Q96B01	RAD51-associated protein 1 OS=Homo sapiens OX=9606 GN=RAD51AP1 PE=1 SV=1	ENSG00000111247	RAD51AP1			-2.32576	0.0417212	0.222524
+pH fractionation/SP	O00629	Importin subunit alpha-3 OS=Homo sapiens OX=9606 GN=KPNA4 PE=1 SV=1	ENSG00000186432	KPNA4			-1.4069	0.0417766	0.222524
+pH fractionation/SP	Q13112	Chromatin assembly factor 1 subunit B OS=Homo sapiens OX=9606 GN=CHAF1B PE=1 SV=1	ENSG00000159259	CHAF1B			-1.26323	0.0418706	0.222524
+pH fractionation/SP	Q92551	Inositol hexakisphosphate kinase 1 OS=Homo sapiens OX=9606 GN=IP6K1 PE=1 SV=3	ENSG00000176095	IP6K1			1.31807	0.0418941	0.222524
+pH fractionation/SP	Q9ULP9	TBC1 domain family member 24 OS=Homo sapiens OX=9606 GN=TBC1D24 PE=1 SV=2	ENSG00000162065	TBC1D24			-2.0329	0.0419141	0.222524
+pH fractionation/SP	O00534	von Willebrand factor A domain-containing protein 5A OS=Homo sapiens OX=9606 GN=VWA5A PE=2 SV=2	ENSG00000110002	VWA5A			2.16338	0.0420004	0.222524
+pH fractionation/SP	Q969Y2-2	Isoform 2 of tRNA modification GTPase GTPBP3, mitochondrial OS=Homo sapiens OX=9606 GN=GTPBP3	ENSG00000130299	GTPBP3			-1.97587	0.0420449	0.222524
-pH fractionation/SP	Q92784-3	Isoform 3 of Zinc finger protein DPF3 OS=Homo sapiens OX=9606 GN=DPF3		DPF3			3.57448	0.0421736	0.128066
+pH fractionation/SP	O43903	Growth arrest-specific protein 2 OS=Homo sapiens OX=9606 GN=GAS2 PE=1 SV=1	ENSG00000148935	GAS2			-1.88944	0.0421939	0.222524
+pH fractionation/SP	Q13740	CD166 antigen OS=Homo sapiens OX=9606 GN=ALCAM PE=1 SV=2	ENSG00000170017	ALCAM			1.39859	0.0421986	0.222524
+pH fractionation/SP	Q9UKU7	Isobutyryl-CoA dehydrogenase, mitochondrial OS=Homo sapiens OX=9606 GN=ACAD8 PE=1 SV=1	ENSG00000151498	ACAD8			1.129	0.0422608	0.222524
+pH fractionation/SP	Q53GS7	Nucleoporin GLE1 OS=Homo sapiens OX=9606 GN=GLE1 PE=1 SV=2	ENSG00000119392	GLE1			3.63118	0.042307	0.222524
+pH fractionation/SP	Q9BQ95	Evolutionarily conserved signaling intermediate in Toll pathway, mitochondrial OS=Homo sapiens OX=9606 GN=ECSIT PE=1 SV=1	ENSG00000130159	ECSIT			-1.80766	0.0425558	0.223146
+pH fractionation/SP	Q96ES7	SAGA-associated factor 29 OS=Homo sapiens OX=9606 GN=SGF29 PE=1 SV=1	ENSG00000176476	CCDC101; SGF29			-1.89253	0.0426674	0.223502
+pH fractionation/SP	Q9NYK5-2	Isoform 2 of 39S ribosomal protein L39, mitochondrial OS=Homo sapiens OX=9606 GN=MRPL39	ENSG00000154719	MRPL39			-1.13064	0.0428254	0.223644
+pH fractionation/SP	P35080-2	Isoform IIb of Profilin-2 OS=Homo sapiens OX=9606 GN=PFN2	ENSG00000070087	PFN2			-2.99985	0.0429003	0.223668
+pH fractionation/SP	Q12824-2	Isoform B of SWI/SNF-related matrix-associated actin-dependent regulator of chromatin subfamily B member 1 OS=Homo sapiens OX=9606 GN=SMARCB1	ENSG00000099956	SMARCB1			2.84435	0.0434484	0.225037
+pH fractionation/SP	Q9NX24	H/ACA ribonucleoprotein complex subunit 2 OS=Homo sapiens OX=9606 GN=NHP2 PE=1 SV=1	ENSG00000145912	NHP2			-1.36644	0.0434876	0.225037
+pH fractionation/RefSeq	Q9NWY4	histone PARylation factor 1 (HPF1), mRNA	ENSG00000056050	HPF1	NM_017867.2_2		-2.15719	0.04353	0.262073
+pH fractionation/SP	Q13492	Phosphatidylinositol-binding clathrin assembly protein OS=Homo sapiens OX=9606 GN=PICALM PE=1 SV=2	ENSG00000073921	PICALM			-1.206	0.0435941	0.225361
+pH fractionation/SP	Q6W2J9	BCL-6 corepressor OS=Homo sapiens OX=9606 GN=BCOR PE=1 SV=1	ENSG00000183337	BCOR			-1.96475	0.0436682	0.225473
+pH fractionation/SP	Q9P2K3-3	Isoform 3 of REST corepressor 3 OS=Homo sapiens OX=9606 GN=RCOR3	ENSG00000117625	RCOR3			-1.58753	0.0437039	0.225473
+pH fractionation/SP	Q13485	Mothers against decapentaplegic homolog 4 OS=Homo sapiens OX=9606 GN=SMAD4 PE=1 SV=1	ENSG00000141646	SMAD4			-1.82993	0.0439037	0.226276
+pH fractionation/SP	Q6UW02	Cytochrome P450 20A1 OS=Homo sapiens OX=9606 GN=CYP20A1 PE=1 SV=1	ENSG00000119004	CYP20A1			1.6011	0.0445192	0.229218
+pH fractionation/SP	Q9H4I3	TraB domain-containing protein OS=Homo sapiens OX=9606 GN=TRABD PE=1 SV=1	ENSG00000170638	TRABD			-1.25677	0.0446963	0.229835
+pH fractionation/SP	Q13308-6	Isoform 6 of Inactive tyrosine-protein kinase 7 OS=Homo sapiens OX=9606 GN=PTK7	ENSG00000112655	PTK7			-1.44883	0.0449251	0.229925
+pH fractionation/SP	P16455	Methylated-DNA--protein-cysteine methyltransferase OS=Homo sapiens OX=9606 GN=MGMT PE=1 SV=1		MGMT			-1.32288	0.0450016	0.229925
+pH fractionation/SP	Q9BTY7	Protein HGH1 homolog OS=Homo sapiens OX=9606 GN=HGH1 PE=1 SV=1	ENSG00000235173	FAM203B; FAM203A; HGH1			-1.10018	0.0452181	0.230163
+pH fractionation/SP	Q9UL26	Ras-related protein Rab-22A OS=Homo sapiens OX=9606 GN=RAB22A PE=1 SV=2	ENSG00000124209	RAB22A			1.68293	0.0452891	0.230175
+pH fractionation/SP	Q8WUH1	Protein Churchill OS=Homo sapiens OX=9606 GN=CHURC1 PE=1 SV=2	ENSG00000258289	CHURC1			-1.03635	0.0455055	0.230817
+pH fractionation/SP	Q9BZV1	UBX domain-containing protein 6 OS=Homo sapiens OX=9606 GN=UBXN6 PE=1 SV=1	ENSG00000167671	UBXN6			1.58423	0.0457504	0.231371
+pH fractionation/SP	Q13287	N-myc-interactor OS=Homo sapiens OX=9606 GN=NMI PE=1 SV=2	ENSG00000123609	NMI			1.32123	0.0459306	0.231825
+pH fractionation/SP	O15297	Protein phosphatase 1D OS=Homo sapiens OX=9606 GN=PPM1D PE=1 SV=1	ENSG00000170836	PPM1D			-1.31347	0.0460451	0.231946
+pH fractionation/SP	Q9UQ13	Leucine-rich repeat protein SHOC-2 OS=Homo sapiens OX=9606 GN=SHOC2 PE=1 SV=2	ENSG00000108061	SHOC2			1.17544	0.0461339	0.231967
+pH fractionation/SP	O43819	Protein SCO2 homolog, mitochondrial OS=Homo sapiens OX=9606 GN=SCO2 PE=1 SV=3	ENSG00000130489	SCO2			-1.89449	0.0461399	0.231967
+pH fractionation/RefSeq	Q96K37	solute carrier family 35 member E1 (SLC35E1), mRNA	ENSG00000127526	SLC35E1	NM_024881.4_3		1.77958	0.0462047	0.270545
+pH fractionation/MAJIQ	Q92599	septin 8 [Source:HGNC Symbol;Acc:HGNC:16511]	ENSG00000164402	SEPT8	ENSG00000164402:s:132099653-132100111_132099584-132099916_L2		1.05808	0.0462692	0.495119
+pH fractionation/SP	Q8IV48	3'-5' exoribonuclease 1 OS=Homo sapiens OX=9606 GN=ERI1 PE=1 SV=3	ENSG00000104626	ERI1			-1.08222	0.0463871	0.232214
+pH fractionation/SP	P13637-3	Isoform 3 of Sodium/potassium-transporting ATPase subunit alpha-3 OS=Homo sapiens OX=9606 GN=ATP1A3	ENSG00000105409	ATP1A3			-2.17034	0.046723	0.232214
+pH fractionation/SP	Q5SW79	Centrosomal protein of 170 kDa OS=Homo sapiens OX=9606 GN=CEP170 PE=1 SV=1	ENSG00000276725	CEP170			1.66183	0.0467623	0.232214
+pH fractionation/SP	Q9BWM7	Sideroflexin-3 OS=Homo sapiens OX=9606 GN=SFXN3 PE=1 SV=3	ENSG00000107819	SFXN3			3.24631	0.0467629	0.232214
+pH fractionation/SP	Q9Y6M4-2	Isoform 2 of Casein kinase I isoform gamma-3 OS=Homo sapiens OX=9606 GN=CSNK1G3	ENSG00000151292	CSNK1G3			2.31773	0.0468209	0.232214
+pH fractionation/SP	Q08170	Serine/arginine-rich splicing factor 4 OS=Homo sapiens OX=9606 GN=SRSF4 PE=1 SV=2	ENSG00000116350	SRSF4			-1.69344	0.047074	0.232548
-pH fractionation/SP	Q5JVS0	Intracellular hyaluronan-binding protein 4 OS=Homo sapiens OX=9606 GN=HABP4 PE=1 SV=1	ENSG00000130956	HABP4			1.82972	0.0472358	0.137712
+pH fractionation/SP	Q96BP3	Peptidylprolyl isomerase domain and WD repeat-containing protein 1 OS=Homo sapiens OX=9606 GN=PPWD1 PE=1 SV=1	ENSG00000113593	PPWD1			1.02751	0.0474052	0.232726
+pH fractionation/SP	Q9UNZ2-5	Isoform 3 of NSFL1 cofactor p47 OS=Homo sapiens OX=9606 GN=NSFL1C	ENSG00000088833	NSFL1C			-1.04624	0.0474169	0.232726
+pH fractionation/SP	Q96IY1	Kinetochore-associated protein NSL1 homolog OS=Homo sapiens OX=9606 GN=NSL1 PE=1 SV=3	ENSG00000117697	NSL1			-2.21714	0.0474896	0.232813
+pH fractionation/SP	Q14566	DNA replication licensing factor MCM6 OS=Homo sapiens OX=9606 GN=MCM6 PE=1 SV=1	ENSG00000076003	MCM6			-1.61753	0.0476654	0.232826
+pH fractionation/SP	Q9P021	Cysteine-rich PDZ-binding protein OS=Homo sapiens OX=9606 GN=CRIPT PE=1 SV=1	ENSG00000119878	CRIPT			-1.66541	0.0476725	0.232826
+pH fractionation/SP	Q9ULX3	RNA-binding protein NOB1 OS=Homo sapiens OX=9606 GN=NOB1 PE=1 SV=1	ENSG00000141101	NOB1			-1.17036	0.0478876	0.233646
-pH fractionation/SP	Q9HB58-6	Isoform 6 of Sp110 nuclear body protein OS=Homo sapiens OX=9606 GN=SP110	ENSG00000135899	SP110			-1.75938	0.0479875	0.138964
+pH fractionation/SP	Q12765-2	Isoform 2 of Secernin-1 OS=Homo sapiens OX=9606 GN=SCRN1	ENSG00000136193	SCRN1			-1.49145	0.0484701	0.235474
+pH fractionation/SP	Q9Y6H1	Coiled-coil-helix-coiled-coil-helix domain-containing protein 2 OS=Homo sapiens OX=9606 GN=CHCHD2 PE=1 SV=1	ENSG00000106153	CHCHD2			1.64365	0.0486187	0.235836
+pH fractionation/SP	Q8N5I9	Uncharacterized protein C12orf45 OS=Homo sapiens OX=9606 GN=C12orf45 PE=1 SV=2	ENSG00000151131	C12orf45			-1.16822	0.0487373	0.235836
+pH fractionation/SP	Q9HCP0	Casein kinase I isoform gamma-1 OS=Homo sapiens OX=9606 GN=CSNK1G1 PE=1 SV=1	ENSG00000169118	CSNK1G1			2.15173	0.0490326	0.236529
+pH fractionation/SP	Q9NYP9	Protein Mis18-alpha OS=Homo sapiens OX=9606 GN=MIS18A PE=1 SV=1	ENSG00000159055	MIS18A			-2.75363	0.0491871	0.236808
+pH fractionation/SP	P31785	Cytokine receptor common subunit gamma OS=Homo sapiens OX=9606 GN=IL2RG PE=1 SV=1	ENSG00000147168	IL2RG			2.02126	0.0492292	0.236808
+pH fractionation/SP	Q9NVN8	Guanine nucleotide-binding protein-like 3-like protein OS=Homo sapiens OX=9606 GN=GNL3L PE=1 SV=1	ENSG00000130119	GNL3L			-4.05181	0.0494064	0.237432
+pH fractionation/SP	P42356	Phosphatidylinositol 4-kinase alpha OS=Homo sapiens OX=9606 GN=PI4KA PE=1 SV=4	ENSG00000241973	PI4KA			1.56476	0.0494515	0.237432
-pH fractionation/SP	Q9UL45	Biogenesis of lysosome-related organelles complex 1 subunit 6 OS=Homo sapiens OX=9606 GN=BLOC1S6 PE=1 SV=1	ENSG00000104164	BLOC1S6			1.40398	0.0500804	0.141504
+pH fractionation/SP	Q14207	Protein NPAT OS=Homo sapiens OX=9606 GN=NPAT PE=1 SV=3	ENSG00000149308	NPAT			1.00351	0.0500841	0.239348
+pH fractionation/SP	Q9H5I1	Histone-lysine N-methyltransferase SUV39H2 OS=Homo sapiens OX=9606 GN=SUV39H2 PE=1 SV=2	ENSG00000152455	SUV39H2			1.84948	0.0503406	0.239918
+pH fractionation/RefSeq	P00374	dihydrofolate reductase (DHFR), transcript variant 1, mRNA	ENSG00000228716	DHFR	NM_000791.3_3		-2.40422	0.0503708	0.284304
+pH fractionation/SP	Q9UL03	Integrator complex subunit 6 OS=Homo sapiens OX=9606 GN=INTS6 PE=1 SV=1	ENSG00000102786	INTS6			3.30906	0.0504649	0.239918

## Sheet: significant FC nuc
Search files/database	SWISS-PROT Accession	Description	Ensembl ID	Gene Symbol	custom database Accession	NUCLEAR FRACTIONS	log2 FC_nuc (S/U)	p.value (imputed MVs)	adjusted p.value
+pH fractionation/SP	Q9NRZ9	Lymphoid-specific helicase OS=Homo sapiens OX=9606 GN=HELLS PE=1 SV=1	ENSG00000119969	HELLS			-3.14565	1.79359e-05	0.04696
+pH fractionation/SP	Q9NQS7	Inner centromere protein OS=Homo sapiens OX=9606 GN=INCENP PE=1 SV=3	ENSG00000149503	INCENP			-3.17078	2.01094e-05	0.04696
-pH fractionation/SP	P53539	Protein fosB OS=Homo sapiens OX=9606 GN=FOSB PE=1 SV=1	ENSG00000125740	FOSB			3.55813	3.14503e-05	0.0106629
+pH fractionation/SP	P11388-4	Isoform 4 of DNA topoisomerase 2-alpha OS=Homo sapiens OX=9606 GN=TOP2A		TOP2A			-1.39633	3.44056e-05	0.04696
-pH fractionation/SP	Q9Y5J9	Mitochondrial import inner membrane translocase subunit Tim8 B OS=Homo sapiens OX=9606 GN=TIMM8B PE=1 SV=1	ENSG00000150779	TIMM8B			-2.95223	3.53662e-05	0.0106629
+pH fractionation/SP	Q53HL2	Borealin OS=Homo sapiens OX=9606 GN=CDCA8 PE=1 SV=2	ENSG00000134690	CDCA8			-3.25098	4.09973e-05	0.04696
+pH fractionation/SP	Q9H3N1	Thioredoxin-related transmembrane protein 1 OS=Homo sapiens OX=9606 GN=TMX1 PE=1 SV=1	ENSG00000139921	TMX1			1.26321	4.67182e-05	0.04696
-pH fractionation/SP	Q6P6C2	RNA demethylase ALKBH5 OS=Homo sapiens OX=9606 GN=ALKBH5 PE=1 SV=2	ENSG00000091542	ALKBH5			-1.12176	5.48573e-05	0.0106629
-pH fractionation/SP	Q8NBM4	Ubiquitin-associated domain-containing protein 2 OS=Homo sapiens OX=9606 GN=UBAC2 PE=1 SV=1	ENSG00000134882	UBAC2			-2.80817	7.1807e-05	0.0110861
-pH fractionation/SP	Q00325	Phosphate carrier protein, mitochondrial OS=Homo sapiens OX=9606 GN=SLC25A3 PE=1 SV=2	ENSG00000075415	SLC25A3			3.171	0.000101485	0.011748
+pH fractionation/SP	Q9NS91	E3 ubiquitin-protein ligase RAD18 OS=Homo sapiens OX=9606 GN=RAD18 PE=1 SV=2	ENSG00000070950	RAD18			-1.74655	0.000115037	0.04696
+pH fractionation/SP	Q13112	Chromatin assembly factor 1 subunit B OS=Homo sapiens OX=9606 GN=CHAF1B PE=1 SV=1	ENSG00000159259	CHAF1B			-2.23719	0.000122163	0.04696
-pH fractionation/SP	O43677	NADH dehydrogenase [ubiquinone] 1 subunit C1, mitochondrial OS=Homo sapiens OX=9606 GN=NDUFC1 PE=1 SV=1	ENSG00000109390	NDUFC1			4.85539	0.000132486	0.011748
+pH fractionation/SP	Q96T88	E3 ubiquitin-protein ligase UHRF1 OS=Homo sapiens OX=9606 GN=UHRF1 PE=1 SV=1	ENSG00000276043	UHRF1			-2.08819	0.000139946	0.04696
+pH fractionation/SP	Q01851	POU domain, class 4, transcription factor 1 OS=Homo sapiens OX=9606 GN=POU4F1 PE=2 SV=4	ENSG00000152192	POU4F1			4.9402	0.000141141	0.04696
+pH fractionation/SP	Q6PL18	ATPase family AAA domain-containing protein 2 OS=Homo sapiens OX=9606 GN=ATAD2 PE=1 SV=1	ENSG00000156802	ATAD2			-1.77581	0.000144913	0.04696
-pH fractionation/SP	P08727	Keratin, type I cytoskeletal 19 OS=Homo sapiens OX=9606 GN=KRT19 PE=1 SV=4	ENSG00000171345	KRT19			4.01377	0.000145054	0.011748
+pH fractionation/SP	Q9P2Y4	Zinc finger protein 219 OS=Homo sapiens OX=9606 GN=ZNF219 PE=1 SV=2	ENSG00000165804	ZNF219			2.99203	0.000150505	0.04696
+pH fractionation/SP	P23771-2	Isoform 2 of Trans-acting T-cell-specific transcription factor GATA-3 OS=Homo sapiens OX=9606 GN=GATA3	ENSG00000107485	GATA3			2.13986	0.000150831	0.04696
-pH fractionation/RefSeq		Homo sapiens malic enzyme 3 (ME3), transcript variant 3, mRNA		ME3	NM_001161586.1_3		6.58616	0.000153142	0.014779
+pH fractionation/SP	P26358-2	Isoform 2 of DNA (cytosine-5)-methyltransferase 1 OS=Homo sapiens OX=9606 GN=DNMT1	ENSG00000130816	DNMT1			-1.52232	0.000155823	0.04696
+pH fractionation/SP	Q7Z417	Nuclear fragile X mental retardation-interacting protein 2 OS=Homo sapiens OX=9606 GN=NUFIP2 PE=1 SV=1	ENSG00000108256	NUFIP2			-1.45644	0.000161876	0.04696
+pH fractionation/SP	Q9H0H5	Rac GTPase-activating protein 1 OS=Homo sapiens OX=9606 GN=RACGAP1 PE=1 SV=1	ENSG00000161800	RACGAP1			-2.02003	0.000173393	0.04696
+pH fractionation/SP	P49454	Centromere protein F OS=Homo sapiens OX=9606 GN=CENPF PE=1 SV=2		CENPF			-2.80242	0.000175953	0.04696
-pH fractionation/SP	Q8WWM7	Ataxin-2-like protein OS=Homo sapiens OX=9606 GN=ATXN2L PE=1 SV=2	ENSG00000168488	ATXN2L			-1.44375	0.000189027	0.011748
+pH fractionation/SP	Q8IYW5	E3 ubiquitin-protein ligase RNF168 OS=Homo sapiens OX=9606 GN=RNF168 PE=1 SV=1	ENSG00000163961	RNF168			-1.88529	0.000192197	0.04696
+pH fractionation/SP	Q9H5X1	MIP18 family protein FAM96A OS=Homo sapiens OX=9606 GN=FAM96A PE=1 SV=1	ENSG00000166797	FAM96A			-3.02435	0.000197698	0.04696
+pH fractionation/SP	O43561-3	Isoform 3 of Linker for activation of T-cells family member 1 OS=Homo sapiens OX=9606 GN=LAT	ENSG00000213658	LAT			4.65562	0.000201663	0.04696
+pH fractionation/SP	Q9P209	Centrosomal protein of 72 kDa OS=Homo sapiens OX=9606 GN=CEP72 PE=1 SV=2	ENSG00000112877	CEP72			-5.31425	0.000218979	0.0487752
-pH fractionation/SP	Q86V88	Magnesium-dependent phosphatase 1 OS=Homo sapiens OX=9606 GN=MDP1 PE=1 SV=1	ENSG00000213920	MDP1			2.71337	0.000226502	0.012098
-pH fractionation/SP	P62341	Thioredoxin reductase-like selenoprotein T OS=Homo sapiens OX=9606 GN=SELENOT PE=1 SV=2	ENSG00000198843	SELT; SELENOT			1.80323	0.000237618	0.0121892
+pH fractionation/SP	P16278	Beta-galactosidase OS=Homo sapiens OX=9606 GN=GLB1 PE=1 SV=2		GLB1			-2.44663	0.000241595	0.0488644
+pH fractionation/RefSeq	Q9UPN4	centrosomal protein 131 (CEP131), transcript variant 3, mRNA	ENSG00000141577	CEP131	NM_001319228.1_1		-1.29513	0.000241949	0.10505
+pH fractionation/SP	P33991	DNA replication licensing factor MCM4 OS=Homo sapiens OX=9606 GN=MCM4 PE=1 SV=5	ENSG00000104738	MCM4			-1.55922	0.000247994	0.0488644
-pH fractionation/SP	Q9NQL2	Ras-related GTP-binding protein D OS=Homo sapiens OX=9606 GN=RRAGD PE=1 SV=1	ENSG00000025039	RRAGD			2.13139	0.000254624	0.0123661
+pH fractionation/SP	Q56NI9	N-acetyltransferase ESCO2 OS=Homo sapiens OX=9606 GN=ESCO2 PE=1 SV=1	ENSG00000171320	ESCO2			-3.11112	0.00027812	0.0527707
-pH fractionation/SP	Q16718	NADH dehydrogenase [ubiquinone] 1 alpha subcomplex subunit 5 OS=Homo sapiens OX=9606 GN=NDUFA5 PE=1 SV=3	ENSG00000128609	NDUFA5			3.26489	0.000299598	0.0134476
+pH fractionation/SP	P14618	Pyruvate kinase PKM OS=Homo sapiens OX=9606 GN=PKM PE=1 SV=4	ENSG00000067225	PKM			1.09597	0.000317456	0.0577724
+pH fractionation/RefSeq	Q4G0N4	NAD kinase 2, mitochondrial (NADK2), transcript variant 1, mRNA	ENSG00000152620	NADK2	NM_001085411.2_3		1.40687	0.000324132	0.10505
-pH fractionation/SP	P49407	Beta-arrestin-1 OS=Homo sapiens OX=9606 GN=ARRB1 PE=1 SV=2	ENSG00000137486	ARRB1			3.48914	0.000339564	0.0137796
-pH fractionation/SP	O00762	Ubiquitin-conjugating enzyme E2 C OS=Homo sapiens OX=9606 GN=UBE2C PE=1 SV=1	ENSG00000175063	UBE2C			5.66009	0.000359609	0.0138353
-pH fractionation/SP	O75438	NADH dehydrogenase [ubiquinone] 1 beta subcomplex subunit 1 OS=Homo sapiens OX=9606 GN=NDUFB1 PE=1 SV=1	ENSG00000183648	NDUFB1			2.97279	0.000407984	0.0144206
-pH fractionation/SP	Q9C005	Protein dpy-30 homolog OS=Homo sapiens OX=9606 GN=DPY30 PE=1 SV=1	ENSG00000162961	DPY30			-1.35442	0.00040799	0.0144206
+pH fractionation/SP	Q96QE3	ATPase family AAA domain-containing protein 5 OS=Homo sapiens OX=9606 GN=ATAD5 PE=1 SV=4	ENSG00000176208	ATAD5			-2.79815	0.000424933	0.0715323
-pH fractionation/SP	Q14008-3	Isoform 3 of Cytoskeleton-associated protein 5 OS=Homo sapiens OX=9606 GN=CKAP5	ENSG00000175216	CKAP5			-1.15835	0.000467099	0.0152878
-pH fractionation/RefSeq		Homo sapiens synaptosome associated protein 29 (SNAP29), mRNA		SNAP29	NM_004782.3_2		4.15176	0.000477312	0.0163886
+pH fractionation/SP	Q9H967	WD repeat-containing protein 76 OS=Homo sapiens OX=9606 GN=WDR76 PE=1 SV=2	ENSG00000092470	WDR76			-2.06902	0.000479682	0.0767941
-pH fractionation/SP	Q96T88-2	Isoform 2 of E3 ubiquitin-protein ligase UHRF1 OS=Homo sapiens OX=9606 GN=UHRF1		UHRF1			-2.4945	0.000501013	0.0152878
-pH fractionation/SP	Q14847-2	Isoform 2 of LIM and SH3 domain protein 1 OS=Homo sapiens OX=9606 GN=LASP1		LASP1			2.10916	0.000506252	0.0152878
+pH fractionation/SP	O95235	Kinesin-like protein KIF20A OS=Homo sapiens OX=9606 GN=KIF20A PE=1 SV=1	ENSG00000112984	KIF20A			-2.33931	0.000512727	0.079597
-pH fractionation/SP	Q9Y5J7	Mitochondrial import inner membrane translocase subunit Tim9 OS=Homo sapiens OX=9606 GN=TIMM9 PE=1 SV=1	ENSG00000100575	TIMM9			4.81441	0.000587428	0.0153877
+pH fractionation/SP	O43663	Protein regulator of cytokinesis 1 OS=Homo sapiens OX=9606 GN=PRC1 PE=1 SV=2	ENSG00000198901	PRC1			-2.04582	0.000600417	0.0904687
+pH fractionation/SP	Q96MX0	CKLF-like MARVEL transmembrane domain-containing protein 3 OS=Homo sapiens OX=9606 GN=CMTM3 PE=1 SV=1	ENSG00000140931	CMTM3			2.73451	0.00063818	0.0905525
+pH fractionation/SP	Q03519	Antigen peptide transporter 2 OS=Homo sapiens OX=9606 GN=TAP2 PE=1 SV=1	ENSG00000204267	TAP2			3.12724	0.00064181	0.0905525
+pH fractionation/SP	P12004	Proliferating cell nuclear antigen OS=Homo sapiens OX=9606 GN=PCNA PE=1 SV=1	ENSG00000132646	PCNA			-1.71483	0.000654	0.0905525
-pH fractionation/SP	P56181	NADH dehydrogenase [ubiquinone] flavoprotein 3, mitochondrial OS=Homo sapiens OX=9606 GN=NDUFV3 PE=1 SV=2	ENSG00000160194	NDUFV3			3.45785	0.000694807	0.0163602
+pH fractionation/SP	P07737	Profilin-1 OS=Homo sapiens OX=9606 GN=PFN1 PE=1 SV=2	ENSG00000108518	PFN1			1.11284	0.000728041	0.0960636
+pH fractionation/SP	P12544	Granzyme A OS=Homo sapiens OX=9606 GN=GZMA PE=1 SV=2	ENSG00000145649	GZMA			5.91743	0.000744524	0.0960636
-pH fractionation/SP	Q9H1X3-3	Isoform 3 of DnaJ homolog subfamily C member 25 OS=Homo sapiens OX=9606 GN=DNAJC25	ENSG00000244115	DNAJC25-GNG10; DNAJC25			-1.92856	0.000755166	0.0166849
-pH fractionation/SP	P53567	CCAAT/enhancer-binding protein gamma OS=Homo sapiens OX=9606 GN=CEBPG PE=1 SV=1	ENSG00000153879	CEBPG			-4.23229	0.000815283	0.0171708
+pH fractionation/SP	Q96PU4	E3 ubiquitin-protein ligase UHRF2 OS=Homo sapiens OX=9606 GN=UHRF2 PE=1 SV=1	ENSG00000147854	UHRF2			-1.01773	0.000822058	0.100272
-pH fractionation/SP	Q08554-2	Isoform 1B of Desmocollin-1 OS=Homo sapiens OX=9606 GN=DSC1	ENSG00000134765	DSC1			6.12315	0.000838879	0.0173785
+pH fractionation/SP	O95865	N(G),N(G)-dimethylarginine dimethylaminohydrolase 2 OS=Homo sapiens OX=9606 GN=DDAH2 PE=1 SV=1	ENSG00000233076	DDAH2			-1.46532	0.000857928	0.101893
+pH fractionation/SP	P33992	DNA replication licensing factor MCM5 OS=Homo sapiens OX=9606 GN=MCM5 PE=1 SV=5	ENSG00000100297	MCM5			-1.56785	0.000878539	0.101893
+pH fractionation/SP	Q95604	HLA class I histocompatibility antigen, Cw-17 alpha chain OS=Homo sapiens OX=9606 GN=HLA-C PE=1 SV=1		HLA-C			2.69447	0.000897006	0.101893
+pH fractionation/SP	Q08AF3	Schlafen family member 5 OS=Homo sapiens OX=9606 GN=SLFN5 PE=1 SV=1	ENSG00000166750	SLFN5			2.01375	0.000932927	0.101893
+pH fractionation/SP	Q1ED39	Lysine-rich nucleolar protein 1 OS=Homo sapiens OX=9606 GN=KNOP1 PE=1 SV=1	ENSG00000103550	C16orf88; KNOP1			-1.41534	0.000934797	0.101893
+pH fractionation/RefSeq	Q6IE81	jade family PHD finger 1 (JADE1), transcript variant 6, mRNA	ENSG00000077684	JADE1	NM_001287441.1_1		-1.4984	0.000958652	0.168087
+pH fractionation/SP	Q9UJU2-6	Isoform 6 of Lymphoid enhancer-binding factor 1 OS=Homo sapiens OX=9606 GN=LEF1	ENSG00000138795	LEF1			5.14347	0.00101268	0.102047
-pH fractionation/MAJIQ		ENSG00000243406:t:52744122-52744234 OS=Homo sapiens GN=ENSG00000243406	ENSG00000243406	MRPS31P5	ENSG00000243406:t:52744122-52744234_52744191-52745293_S0		3.57048	0.00103626	0.0225164
-pH fractionation/SP	P02679	Fibrinogen gamma chain OS=Homo sapiens OX=9606 GN=FGG PE=1 SV=3	ENSG00000171557	FGG			4.95007	0.00105122	0.0186599
-pH fractionation/SP	Q5T200-2	Isoform 2 of Zinc finger CCCH domain-containing protein 13 OS=Homo sapiens OX=9606 GN=ZC3H13	ENSG00000123200	ZC3H13			-1.26492	0.00110414	0.0186599
-pH fractionation/SP	O95067	G2/mitotic-specific cyclin-B2 OS=Homo sapiens OX=9606 GN=CCNB2 PE=1 SV=1	ENSG00000157456	CCNB2			-2.88088	0.00112943	0.0186599
-pH fractionation/SP	Q9GZY8	Mitochondrial fission factor OS=Homo sapiens OX=9606 GN=MFF PE=1 SV=1	ENSG00000168958	MFF			4.95961	0.00113405	0.0186599
-pH fractionation/SP	Q96SB4-3	Isoform 1 of SRSF protein kinase 1 OS=Homo sapiens OX=9606 GN=SRPK1		SRPK1			-1.19001	0.00116862	0.0186599
+pH fractionation/SP	Q92974	Rho guanine nucleotide exchange factor 2 OS=Homo sapiens OX=9606 GN=ARHGEF2 PE=1 SV=4	ENSG00000116584	ARHGEF2			1.05711	0.00117896	0.110795
-pH fractionation/SP	Q7Z569	BRCA1-associated protein OS=Homo sapiens OX=9606 GN=BRAP PE=1 SV=2	ENSG00000089234	BRAP			-2.00538	0.00118502	0.0186599
-pH fractionation/SP	Q8N8E2	Zinc finger protein 513 OS=Homo sapiens OX=9606 GN=ZNF513 PE=1 SV=2	ENSG00000163795	ZNF513			4.56488	0.00123105	0.0188431
+pH fractionation/SP	Q9UQ80	Proliferation-associated protein 2G4 OS=Homo sapiens OX=9606 GN=PA2G4 PE=1 SV=3	ENSG00000170515	PA2G4			-1.11164	0.00124597	0.111984
-pH fractionation/SP	O43561	Linker for activation of T-cells family member 1 OS=Homo sapiens OX=9606 GN=LAT PE=1 SV=1	ENSG00000213658	LAT			2.14826	0.00136762	0.0193507
-pH fractionation/SP	O43674	NADH dehydrogenase [ubiquinone] 1 beta subcomplex subunit 5, mitochondrial OS=Homo sapiens OX=9606 GN=NDUFB5 PE=1 SV=1	ENSG00000136521	NDUFB5			3.37868	0.0013834	0.0193507
+pH fractionation/SP	Q14807	Kinesin-like protein KIF22 OS=Homo sapiens OX=9606 GN=KIF22 PE=1 SV=5	ENSG00000079616	KIF22			-2.64156	0.00143549	0.119416
+pH fractionation/SP	Q9BWT1-2	Isoform 2 of Cell division cycle-associated protein 7 OS=Homo sapiens OX=9606 GN=CDCA7	ENSG00000144354	CDCA7			-3.13722	0.00144521	0.119416
+pH fractionation/SP	P01733	T-cell receptor beta chain V region YT35 OS=Homo sapiens OX=9606 GN=TRBV12-3 PE=1 SV=1		TRBV12-3			1.10019	0.00151151	0.122912
-pH fractionation/SP	Q9Y605	MORF4 family-associated protein 1 OS=Homo sapiens OX=9606 GN=MRFAP1 PE=1 SV=1	ENSG00000179010	MRFAP1			-2.32972	0.00152954	0.0202172
+pH fractionation/SP	A0A0B4J237	T cell receptor alpha variable 8-2 OS=Homo sapiens OX=9606 GN=TRAV8-2 PE=3 SV=1	ENSG00000211786	TRAV8-2			-4.83747	0.00153607	0.122958
-pH fractionation/SP	Q9BV81	ER membrane protein complex subunit 6 OS=Homo sapiens OX=9606 GN=EMC6 PE=1 SV=1	ENSG00000127774	EMC6			2.95932	0.00163349	0.0205686
-pH fractionation/SP	Q9ULW0-2	Isoform 2 of Targeting protein for Xklp2 OS=Homo sapiens OX=9606 GN=TPX2	ENSG00000088325	TPX2			-2.57658	0.00163447	0.0205686
+pH fractionation/SP	P33993	DNA replication licensing factor MCM7 OS=Homo sapiens OX=9606 GN=MCM7 PE=1 SV=4	ENSG00000166508	MCM7			-1.44226	0.00164817	0.127973
-pH fractionation/SP	Q16611	Bcl-2 homologous antagonist/killer OS=Homo sapiens OX=9606 GN=BAK1 PE=1 SV=1	ENSG00000030110	BAK1			3.05154	0.0016703	0.0205686
+pH fractionation/SP	Q9Y5J1	U3 small nucleolar RNA-associated protein 18 homolog OS=Homo sapiens OX=9606 GN=UTP18 PE=1 SV=3	ENSG00000011260	UTP18			-1.12082	0.00167152	0.127973
+pH fractionation/SP	Q9NVN8	Guanine nucleotide-binding protein-like 3-like protein OS=Homo sapiens OX=9606 GN=GNL3L PE=1 SV=1	ENSG00000130119	GNL3L			-1.18026	0.00167367	0.127973
-pH fractionation/SP	Q96NB3	Zinc finger protein 830 OS=Homo sapiens OX=9606 GN=ZNF830 PE=1 SV=2	ENSG00000198783	ZNF830			-3.34509	0.00174389	0.0209358
+pH fractionation/MAJIQ			ENSG00000034063	ENSG00000034063	ENSG00000034063:t:4910566-4911285_4909667-4910888_S2		-2.42421	0.00175446	0.659092
-pH fractionation/SP	Q12968	Nuclear factor of activated T-cells, cytoplasmic 3 OS=Homo sapiens OX=9606 GN=NFATC3 PE=1 SV=1	ENSG00000072736	NFATC3			3.77028	0.00178786	0.0209358
+pH fractionation/SP	Q96Q89-2	Isoform 2 of Kinesin-like protein KIF20B OS=Homo sapiens OX=9606 GN=KIF20B		KIF20B			-2.19162	0.00192573	0.142784
-pH fractionation/SP	Q96IJ6-2	Isoform 2 of Mannose-1-phosphate guanyltransferase alpha OS=Homo sapiens OX=9606 GN=GMPPA	ENSG00000144591	GMPPA			3.51825	0.00195375	0.0216723
+pH fractionation/SP	P55197	Protein AF-10 OS=Homo sapiens OX=9606 GN=MLLT10 PE=1 SV=2	ENSG00000078403	MLLT10			-1.2453	0.00199132	0.142784
+pH fractionation/SP	Q9NR30	Nucleolar RNA helicase 2 OS=Homo sapiens OX=9606 GN=DDX21 PE=1 SV=5	ENSG00000165732	DDX21			-1.68714	0.00200672	0.142784
-pH fractionation/RefSeq		Homo sapiens histone cluster 1 H2B family member o (HIST1H2BO), mRNA		HIST1H2BO	NM_003527.4_2		-1.29109	0.00210436	0.0232719
+pH fractionation/SP	Q9UPN4	Centrosomal protein of 131 kDa OS=Homo sapiens OX=9606 GN=CEP131 PE=1 SV=3	ENSG00000141577	AZI1; CEP131			-1.91043	0.00211615	0.148507
-pH fractionation/SP	Q9NZT1	Calmodulin-like protein 5 OS=Homo sapiens OX=9606 GN=CALML5 PE=1 SV=2	ENSG00000178372	CALML5			2.11115	0.00218378	0.022242
+pH fractionation/SP	Q6P0N0	Mis18-binding protein 1 OS=Homo sapiens OX=9606 GN=MIS18BP1 PE=1 SV=1	ENSG00000129534	MIS18BP1			-2.4433	0.00222343	0.150738
-pH fractionation/SP	Q14186	Transcription factor Dp-1 OS=Homo sapiens OX=9606 GN=TFDP1 PE=1 SV=1	ENSG00000198176	TFDP1			-1.08763	0.00223456	0.022242
-pH fractionation/SP	Q9P0J7	E3 ubiquitin-protein ligase KCMF1 OS=Homo sapiens OX=9606 GN=KCMF1 PE=1 SV=2	ENSG00000176407	KCMF1			3.14894	0.00224853	0.022242
-pH fractionation/SP	Q07687	Homeobox protein DLX-2 OS=Homo sapiens OX=9606 GN=DLX2 PE=1 SV=2	ENSG00000115844	DLX2			2.77751	0.00226022	0.022242
-pH fractionation/SP	Q9BSM1	Polycomb group RING finger protein 1 OS=Homo sapiens OX=9606 GN=PCGF1 PE=1 SV=2	ENSG00000115289	PCGF1			-4.00752	0.00227312	0.0222611
+pH fractionation/SP	P25205-2	Isoform 2 of DNA replication licensing factor MCM3 OS=Homo sapiens OX=9606 GN=MCM3	ENSG00000112118	MCM3			-1.48514	0.00227982	0.150738
+pH fractionation/SP	P61024	Cyclin-dependent kinases regulatory subunit 1 OS=Homo sapiens OX=9606 GN=CKS1B PE=1 SV=1	ENSG00000173207	CKS1B			-3.30978	0.00237188	0.150738
-pH fractionation/RefSeq		Homo sapiens histone cluster 1 H2B family member l (HIST1H2BL), mRNA		HIST1H2BL	NM_003519.3_1		2.89391	0.00238999	0.0238961
+pH fractionation/SP	Q9Y639	Neuroplastin OS=Homo sapiens OX=9606 GN=NPTN PE=1 SV=2	ENSG00000156642	NPTN			2.46985	0.00241061	0.150738
-pH fractionation/RefSeq		Homo sapiens ZBTB11 antisense RNA 1 (ZBTB11-AS1), long non-coding RNA		ZBTB11-AS1	NR_024407.1_2		-1.32413	0.00241779	0.0238961
+pH fractionation/SP	P06396	Gelsolin OS=Homo sapiens OX=9606 GN=GSN PE=1 SV=1	ENSG00000148180	GSN			1.91472	0.00249442	0.150738
+pH fractionation/SP	P53350	Serine/threonine-protein kinase PLK1 OS=Homo sapiens OX=9606 GN=PLK1 PE=1 SV=1	ENSG00000166851	PLK1			-2.00637	0.00252667	0.150738
-pH fractionation/SP	P09493-5	Isoform 5 of Tropomyosin alpha-1 chain OS=Homo sapiens OX=9606 GN=TPM1	ENSG00000140416	TPM1			-1.89244	0.0025367	0.0236181
+pH fractionation/SP	Q96AK3	DNA dC->dU-editing enzyme APOBEC-3D OS=Homo sapiens OX=9606 GN=APOBEC3D PE=1 SV=1	ENSG00000243811	APOBEC3D			3.76104	0.00257996	0.150738
+pH fractionation/SP	O95149	Snurportin-1 OS=Homo sapiens OX=9606 GN=SNUPN PE=1 SV=1	ENSG00000169371	SNUPN			4.15684	0.00261308	0.150738
+pH fractionation/SP	O96028	Histone-lysine N-methyltransferase NSD2 OS=Homo sapiens OX=9606 GN=NSD2 PE=1 SV=1	ENSG00000109685	WHSC1; NSD2			-1.91024	0.00262044	0.150738
+pH fractionation/SP	Q9ULE6	Paladin OS=Homo sapiens OX=9606 GN=PALD1 PE=1 SV=3	ENSG00000107719	PALD1			-1.02838	0.00264814	0.150738
-pH fractionation/MAJIQ		ENSG00000239779:t:74686770-74686874 OS=Homo sapiens GN=ENSG00000239779	ENSG00000239779	WBP1	ENSG00000239779:t:74686770-74686874_74685798-74686770_S2		-1.63079	0.00266637	0.0337665
+pH fractionation/SP	Q562F6	Shugoshin 2 OS=Homo sapiens OX=9606 GN=SGO2 PE=1 SV=2	ENSG00000163535	SGOL2; SGO2			-2.11527	0.00271085	0.152612
-pH fractionation/SP	Q6SJ96	TATA box-binding protein-like protein 2 OS=Homo sapiens OX=9606 GN=TBPL2 PE=2 SV=1	ENSG00000182521	TBPL2			-4.34465	0.00279139	0.0247967
+pH fractionation/SP	O43463-2	Isoform 2 of Histone-lysine N-methyltransferase SUV39H1 OS=Homo sapiens OX=9606 GN=SUV39H1	ENSG00000101945	SUV39H1			-1.71951	0.0028309	0.157638
-pH fractionation/SP	Q9Y6M9	NADH dehydrogenase [ubiquinone] 1 beta subcomplex subunit 9 OS=Homo sapiens OX=9606 GN=NDUFB9 PE=1 SV=3	ENSG00000147684	NDUFB9			3.01691	0.00283124	0.0249485
-pH fractionation/SP	Q9UBF8-2	Isoform 2 of Phosphatidylinositol 4-kinase beta OS=Homo sapiens OX=9606 GN=PI4KB	ENSG00000143393	PI4KB			1.84997	0.00294913	0.0253144
+pH fractionation/SP	Q9ULW0	Targeting protein for Xklp2 OS=Homo sapiens OX=9606 GN=TPX2 PE=1 SV=2	ENSG00000088325	TPX2			-2.25762	0.00295665	0.16287
-pH fractionation/RefSeq		Homo sapiens small integral membrane protein 24 (SMIM24), mRNA		SMIM24	NM_001136503.1_1		1.98138	0.00306042	0.0248288
+pH fractionation/SP	Q8NHQ9	ATP-dependent RNA helicase DDX55 OS=Homo sapiens OX=9606 GN=DDX55 PE=1 SV=3	ENSG00000111364	DDX55			-1.35733	0.00315012	0.166082
-pH fractionation/SP	O75093	Slit homolog 1 protein OS=Homo sapiens OX=9606 GN=SLIT1 PE=2 SV=4	ENSG00000187122	SLIT1			-2.21194	0.00317977	0.0262638
+pH fractionation/SP	Q69YH5	Cell division cycle-associated protein 2 OS=Homo sapiens OX=9606 GN=CDCA2 PE=1 SV=2	ENSG00000184661	CDCA2			-2.3828	0.00324603	0.167974
-pH fractionation/SP	Q8IU60	m7GpppN-mRNA hydrolase OS=Homo sapiens OX=9606 GN=DCP2 PE=1 SV=2		DCP2			1.89266	0.00333354	0.0268322
-pH fractionation/SP	Q9UHA2	SS18-like protein 2 OS=Homo sapiens OX=9606 GN=SS18L2 PE=3 SV=1	ENSG00000008324	SS18L2			-1.48036	0.0033439	0.0268322
-pH fractionation/SP	P56962	Syntaxin-17 OS=Homo sapiens OX=9606 GN=STX17 PE=1 SV=2	ENSG00000136874	STX17			-2.24357	0.00336462	0.0268875
-pH fractionation/SP	P28074-3	Isoform 3 of Proteasome subunit beta type-5 OS=Homo sapiens OX=9606 GN=PSMB5	ENSG00000100804	PSMB5			2.39747	0.00337149	0.0268875
+pH fractionation/SP	Q8WWM7-3	Isoform 3 of Ataxin-2-like protein OS=Homo sapiens OX=9606 GN=ATXN2L	ENSG00000168488	ATXN2L			-1.14073	0.00338516	0.170021
-pH fractionation/SP	P20962	Parathymosin OS=Homo sapiens OX=9606 GN=PTMS PE=1 SV=2	ENSG00000159335	PTMS			2.14731	0.0034012	0.0269302
-pH fractionation/SP	P46100-2	Isoform 1 of Transcriptional regulator ATRX OS=Homo sapiens OX=9606 GN=ATRX	ENSG00000085224	ATRX			2.87485	0.00345161	0.0269453
+pH fractionation/SP	O15145	Actin-related protein 2/3 complex subunit 3 OS=Homo sapiens OX=9606 GN=ARPC3 PE=1 SV=3	ENSG00000111229	ARPC3			1.49945	0.00347783	0.172706
-pH fractionation/SP	Q147X3	N-alpha-acetyltransferase 30 OS=Homo sapiens OX=9606 GN=NAA30 PE=1 SV=1	ENSG00000139977	NAA30			2.14334	0.00348554	0.027084
+pH fractionation/SP	Q9H6R0	ATP-dependent RNA helicase DHX33 OS=Homo sapiens OX=9606 GN=DHX33 PE=1 SV=2	ENSG00000005100	DHX33			-1.68896	0.00350603	0.172706
-pH fractionation/SP	Q14520	Hyaluronan-binding protein 2 OS=Homo sapiens OX=9606 GN=HABP2 PE=1 SV=1	ENSG00000148702	HABP2			2.42027	0.00351662	0.0270862
-pH fractionation/SP	Q8N9N2	Activating signal cointegrator 1 complex subunit 1 OS=Homo sapiens OX=9606 GN=ASCC1 PE=1 SV=1	ENSG00000138303	ASCC1			-1.02987	0.003638	0.0272107
-pH fractionation/SP	O95183	Vesicle-associated membrane protein 5 OS=Homo sapiens OX=9606 GN=VAMP5 PE=1 SV=1	ENSG00000168899	VAMP5			-2.8706	0.00377182	0.0272845
+pH fractionation/SP	Q7L590	Protein MCM10 homolog OS=Homo sapiens OX=9606 GN=MCM10 PE=1 SV=2	ENSG00000065328	MCM10			-3.98968	0.00377217	0.180606
-pH fractionation/SP	P15954	Cytochrome c oxidase subunit 7C, mitochondrial OS=Homo sapiens OX=9606 GN=COX7C PE=1 SV=1	ENSG00000127184	COX7C			4.89357	0.00377386	0.0272845
+pH fractionation/SP	Q12834	Cell division cycle protein 20 homolog OS=Homo sapiens OX=9606 GN=CDC20 PE=1 SV=2	ENSG00000117399	CDC20			-3.13063	0.00398951	0.182573
+pH fractionation/SP	B0I1T2	Unconventional myosin-Ig OS=Homo sapiens OX=9606 GN=MYO1G PE=1 SV=2	ENSG00000136286	MYO1G			1.72256	0.00400618	0.182573
+pH fractionation/SP	O95319-2	Isoform 2 of CUGBP Elav-like family member 2 OS=Homo sapiens OX=9606 GN=CELF2	ENSG00000048740	CELF2			1.34486	0.00402869	0.182573
+pH fractionation/SP	O00488	Zinc finger protein 593 OS=Homo sapiens OX=9606 GN=ZNF593 PE=1 SV=2	ENSG00000142684	ZNF593			-1.42111	0.00405807	0.182573
+pH fractionation/SP	Q9H3Z4	DnaJ homolog subfamily C member 5 OS=Homo sapiens OX=9606 GN=DNAJC5 PE=1 SV=1	ENSG00000101152	DNAJC5			-4.73236	0.00406272	0.182573
-pH fractionation/SP	O95298	NADH dehydrogenase [ubiquinone] 1 subunit C2 OS=Homo sapiens OX=9606 GN=NDUFC2 PE=1 SV=1	ENSG00000151366	NDUFC2; NDUFC2-KCTD14			3.43705	0.00426088	0.028952
-pH fractionation/SP	Q8N490-2	Isoform 2 of Probable hydrolase PNKD OS=Homo sapiens OX=9606 GN=PNKD	ENSG00000127838	PNKD			1.15322	0.0043464	0.028952
+pH fractionation/SP	P46783	40S ribosomal protein S10 OS=Homo sapiens OX=9606 GN=RPS10 PE=1 SV=1	ENSG00000124614	RPS10			-1.11129	0.00438834	0.190521
-pH fractionation/SP	O95182	NADH dehydrogenase [ubiquinone] 1 alpha subcomplex subunit 7 OS=Homo sapiens OX=9606 GN=NDUFA7 PE=1 SV=3	ENSG00000267855	NDUFA7			4.64088	0.00440378	0.028952
+pH fractionation/SP	P21580	Tumor necrosis factor alpha-induced protein 3 OS=Homo sapiens OX=9606 GN=TNFAIP3 PE=1 SV=1	ENSG00000118503	TNFAIP3			2.01983	0.00461026	0.194535
+pH fractionation/RefSeq	Q1ED39	lysine rich nucleolar protein 1 (KNOP1), transcript variant 2, mRNA	ENSG00000103550	KNOP1	NM_001012991.2_3		-1.18041	0.00467554	0.243959
+pH fractionation/SP	Q99439	Calponin-2 OS=Homo sapiens OX=9606 GN=CNN2 PE=1 SV=4	ENSG00000064666	CNN2			1.01392	0.00480154	0.194535
+pH fractionation/SP	O75843	AP-1 complex subunit gamma-like 2 OS=Homo sapiens OX=9606 GN=AP1G2 PE=1 SV=1	ENSG00000213983	AP1G2			-4.65785	0.00486052	0.194535
+pH fractionation/SP	P60983	Glia maturation factor beta OS=Homo sapiens OX=9606 GN=GMFB PE=1 SV=2	ENSG00000197045	GMFB			1.69154	0.00494329	0.195471
+pH fractionation/SP	Q96S99	Pleckstrin homology domain-containing family F member 1 OS=Homo sapiens OX=9606 GN=PLEKHF1 PE=1 SV=3	ENSG00000166289	PLEKHF1			2.29809	0.00503801	0.197021
+pH fractionation/SP	P54132	Bloom syndrome protein OS=Homo sapiens OX=9606 GN=BLM PE=1 SV=1	ENSG00000197299	BLM			-1.39418	0.00523491	0.19981
+pH fractionation/SP	Q9UBS0	Ribosomal protein S6 kinase beta-2 OS=Homo sapiens OX=9606 GN=RPS6KB2 PE=1 SV=2	ENSG00000175634	RPS6KB2			-2.55846	0.00531321	0.200144
-pH fractionation/SP	Q9BRJ7-2	Isoform 2 of Tudor-interacting repair regulator protein OS=Homo sapiens OX=9606 GN=NUDT16L1	ENSG00000168101	NUDT16L1			-1.02827	0.00532324	0.0311656
-pH fractionation/MAJIQ		ENSG00000183570:s:47330816-47330944 OS=Homo sapiens GN=ENSG00000183570	ENSG00000183570	PCBP3	ENSG00000183570:s:47330816-47330944_47330944-47333865_L0		1.6469	0.00535675	0.0440593
-pH fractionation/SP	P78559	Microtubule-associated protein 1A OS=Homo sapiens OX=9606 GN=MAP1A PE=1 SV=6	ENSG00000166963	MAP1A			-1.44049	0.00551532	0.0316451
+pH fractionation/SP	Q8IUF8	Ribosomal oxygenase 2 OS=Homo sapiens OX=9606 GN=RIOX2 PE=1 SV=1	ENSG00000170854	MINA; RIOX2			-2.58201	0.00558702	0.202763
+pH fractionation/SP	Q9BVK6	Transmembrane emp24 domain-containing protein 9 OS=Homo sapiens OX=9606 GN=TMED9 PE=1 SV=2	ENSG00000184840	TMED9			1.20262	0.0056382	0.202763
+pH fractionation/SP	P78364	Polyhomeotic-like protein 1 OS=Homo sapiens OX=9606 GN=PHC1 PE=1 SV=3	ENSG00000111752	PHC1			1.20832	0.00565388	0.202763
+pH fractionation/SP	P50579	Methionine aminopeptidase 2 OS=Homo sapiens OX=9606 GN=METAP2 PE=1 SV=1	ENSG00000111142	METAP2			-2.06736	0.0056996	0.202763
+pH fractionation/SP	Q13111	Chromatin assembly factor 1 subunit A OS=Homo sapiens OX=9606 GN=CHAF1A PE=1 SV=3		CHAF1A			-2.10463	0.00570082	0.202763
-pH fractionation/SP	Q8IUI8	Cytokine receptor-like factor 3 OS=Homo sapiens OX=9606 GN=CRLF3 PE=1 SV=2	ENSG00000176390	CRLF3			2.24147	0.00573868	0.0318659
-pH fractionation/SP	Q9UBF6	RING-box protein 2 OS=Homo sapiens OX=9606 GN=RNF7 PE=1 SV=1	ENSG00000114125	RNF7			1.56866	0.00574669	0.0318694
+pH fractionation/SP	P19838-2	Isoform 2 of Nuclear factor NF-kappa-B p105 subunit OS=Homo sapiens OX=9606 GN=NFKB1	ENSG00000109320	NFKB1			1.26601	0.00580615	0.202765
+pH fractionation/RefSeq	P51955	NIMA related kinase 2 (NEK2), transcript variant 1, mRNA	ENSG00000117650	NEK2	NM_002497.3_1		-2.7753	0.00595114	0.263647
+pH fractionation/SP	Q15154-5	Isoform 5 of Pericentriolar material 1 protein OS=Homo sapiens OX=9606 GN=PCM1		PCM1			-1.46568	0.00596714	0.202765
+pH fractionation/SP	Q13283	Ras GTPase-activating protein-binding protein 1 OS=Homo sapiens OX=9606 GN=G3BP1 PE=1 SV=1	ENSG00000145907	G3BP1			-1.12368	0.00604204	0.202765
-pH fractionation/SP	Q659C4	La-related protein 1B OS=Homo sapiens OX=9606 GN=LARP1B PE=1 SV=2	ENSG00000138709	LARP1B			-2.70257	0.00607242	0.0330136
-pH fractionation/SP	Q9NR46-2	Isoform 2 of Endophilin-B2 OS=Homo sapiens OX=9606 GN=SH3GLB2	ENSG00000148341	SH3GLB2			-1.45625	0.00620619	0.0333863
+pH fractionation/SP	Q9H9B4	Sideroflexin-1 OS=Homo sapiens OX=9606 GN=SFXN1 PE=1 SV=4	ENSG00000164466	SFXN1			1.26345	0.00625005	0.205801
+pH fractionation/SP	P15153	Ras-related C3 botulinum toxin substrate 2 OS=Homo sapiens OX=9606 GN=RAC2 PE=1 SV=1	ENSG00000128340	RAC2			1.23749	0.00629424	0.205801
+pH fractionation/SP	Q96GD4-5	Isoform 5 of Aurora kinase B OS=Homo sapiens OX=9606 GN=AURKB	ENSG00000178999	AURKB			-2.26847	0.00630699	0.205801
+pH fractionation/SP	P23743	Diacylglycerol kinase alpha OS=Homo sapiens OX=9606 GN=DGKA PE=1 SV=3	ENSG00000065357	DGKA			1.4382	0.00646549	0.208319
+pH fractionation/SP	P01106-2	Isoform 2 of Myc proto-oncogene protein OS=Homo sapiens OX=9606 GN=MYC	ENSG00000136997	MYC			-3.64945	0.00650662	0.208334
+pH fractionation/SP	Q569K4	Zinc finger protein 385B OS=Homo sapiens OX=9606 GN=ZNF385B PE=1 SV=1	ENSG00000144331	ZNF385B			-3.51043	0.00659075	0.208861
+pH fractionation/SP	Q16763	Ubiquitin-conjugating enzyme E2 S OS=Homo sapiens OX=9606 GN=UBE2S PE=1 SV=2	ENSG00000108106	UBE2S			-1.42287	0.00660461	0.208861
-pH fractionation/SP	Q9UG22	GTPase IMAP family member 2 OS=Homo sapiens OX=9606 GN=GIMAP2 PE=1 SV=2	ENSG00000106560	GIMAP2			2.40255	0.00664085	0.0343936
+pH fractionation/SP	O95239	Chromosome-associated kinesin KIF4A OS=Homo sapiens OX=9606 GN=KIF4A PE=1 SV=3	ENSG00000090889	KIF4A			-1.26076	0.00678037	0.211827
+pH fractionation/SP	P48059-3	Isoform 3 of LIM and senescent cell antigen-like-containing domain protein 1 OS=Homo sapiens OX=9606 GN=LIMS1	ENSG00000169756	LIMS1			3.00784	0.00700573	0.214586
+pH fractionation/SP	Q6IBS0	Twinfilin-2 OS=Homo sapiens OX=9606 GN=TWF2 PE=1 SV=2	ENSG00000247596	TWF2			1.23844	0.00703697	0.214586
+pH fractionation/SP	Q6NXR4	TELO2-interacting protein 2 OS=Homo sapiens OX=9606 GN=TTI2 PE=1 SV=1	ENSG00000129696	TTI2			2.31263	0.00710687	0.214684
+pH fractionation/SP	Q9UGP8	Translocation protein SEC63 homolog OS=Homo sapiens OX=9606 GN=SEC63 PE=1 SV=2	ENSG00000025796	SEC63			1.09895	0.00712401	0.214684
-pH fractionation/SP	Q9Y3P8	Signaling threshold-regulating transmembrane adapter 1 OS=Homo sapiens OX=9606 GN=SIT1 PE=1 SV=1	ENSG00000137078	SIT1			3.84119	0.00736135	0.036017
+pH fractionation/SP	P49736	DNA replication licensing factor MCM2 OS=Homo sapiens OX=9606 GN=MCM2 PE=1 SV=4	ENSG00000073111	MCM2			-1.23338	0.00737844	0.219901
-pH fractionation/SP	P00734	Prothrombin OS=Homo sapiens OX=9606 GN=F2 PE=1 SV=2	ENSG00000180210	F2			3.7233	0.00742329	0.036017
+pH fractionation/SP	Q9BT23	LIM domain-containing protein 2 OS=Homo sapiens OX=9606 GN=LIMD2 PE=1 SV=1	ENSG00000136490	LIMD2			4.86123	0.00748619	0.220054
+pH fractionation/SP	Q96EU6	Ribosomal RNA processing protein 36 homolog OS=Homo sapiens OX=9606 GN=RRP36 PE=1 SV=1	ENSG00000124541	RRP36			-1.23241	0.00759827	0.22117
-pH fractionation/SP	P17568	NADH dehydrogenase [ubiquinone] 1 beta subcomplex subunit 7 OS=Homo sapiens OX=9606 GN=NDUFB7 PE=1 SV=4	ENSG00000099795	NDUFB7			3.77112	0.00762706	0.0363794
-pH fractionation/SP	Q9NVE7	Pantothenate kinase 4 OS=Homo sapiens OX=9606 GN=PANK4 PE=1 SV=1	ENSG00000273494	PANK4			3.18636	0.0076893	0.0365615
+pH fractionation/SP	Q96S97	Myeloid-associated differentiation marker OS=Homo sapiens OX=9606 GN=MYADM PE=1 SV=2	ENSG00000179820	MYADM			3.2342	0.00771755	0.222118
-pH fractionation/RefSeq		Homo sapiens coagulation factor VIII-associated 3 (F8A3), mRNA		F8A3	NM_001007524.1_3		1.36054	0.00785215	0.0357043
-pH fractionation/SP	O60238	BCL2/adenovirus E1B 19 kDa protein-interacting protein 3-like OS=Homo sapiens OX=9606 GN=BNIP3L PE=1 SV=1	ENSG00000104765	BNIP3L			2.81028	0.00804656	0.0373882
+pH fractionation/SP	Q01826-2	Isoform 2 of DNA-binding protein SATB1 OS=Homo sapiens OX=9606 GN=SATB1	ENSG00000182568	SATB1			-1.09509	0.00828001	0.231322
+pH fractionation/SP	Q02241	Kinesin-like protein KIF23 OS=Homo sapiens OX=9606 GN=KIF23 PE=1 SV=3	ENSG00000137807	KIF23			-1.59747	0.00830826	0.231322
+pH fractionation/SP	P26885	Peptidyl-prolyl cis-trans isomerase FKBP2 OS=Homo sapiens OX=9606 GN=FKBP2 PE=1 SV=2	ENSG00000173486	FKBP2			-1.90793	0.0084165	0.232307
+pH fractionation/SP	P38935	DNA-binding protein SMUBP-2 OS=Homo sapiens OX=9606 GN=IGHMBP2 PE=1 SV=3	ENSG00000132740	IGHMBP2			-1.16844	0.00855322	0.233075
+pH fractionation/SP	Q96FF9	Sororin OS=Homo sapiens OX=9606 GN=CDCA5 PE=1 SV=1	ENSG00000146670	CDCA5			-1.79074	0.00866209	0.234222
+pH fractionation/SP	P04439	HLA class I histocompatibility antigen, A-3 alpha chain OS=Homo sapiens OX=9606 GN=HLA-A PE=1 SV=2	ENSG00000206503	HLA-A			1.42795	0.00868674	0.234222
+pH fractionation/SP	Q15738	Sterol-4-alpha-carboxylate 3-dehydrogenase, decarboxylating OS=Homo sapiens OX=9606 GN=NSDHL PE=1 SV=2	ENSG00000147383	NSDHL			1.09807	0.00885755	0.237577
-pH fractionation/SP	Q9UHX1	Poly(U)-binding-splicing factor PUF60 OS=Homo sapiens OX=9606 GN=PUF60 PE=1 SV=1	ENSG00000274081	PUF60			-1.09577	0.00890263	0.0395071
+pH fractionation/SP	Q8WWK9	Cytoskeleton-associated protein 2 OS=Homo sapiens OX=9606 GN=CKAP2 PE=1 SV=1	ENSG00000136108	CKAP2			-1.86725	0.0089513	0.238841
-pH fractionation/SP	O43805	Sjoegren syndrome nuclear autoantigen 1 OS=Homo sapiens OX=9606 GN=SSNA1 PE=1 SV=2	ENSG00000176101	SSNA1			-3.02514	0.00896243	0.0396428
+pH fractionation/SP	O15446	DNA-directed RNA polymerase I subunit RPA34 OS=Homo sapiens OX=9606 GN=CD3EAP PE=1 SV=1	ENSG00000117877	CD3EAP			-1.23252	0.00910939	0.240436
+pH fractionation/SP	Q3SXM5	Inactive hydroxysteroid dehydrogenase-like protein 1 OS=Homo sapiens OX=9606 GN=HSDL1 PE=1 SV=3	ENSG00000103160	HSDL1			2.07022	0.00912653	0.240436
+pH fractionation/SP	P25440-2	Isoform 2 of Bromodomain-containing protein 2 OS=Homo sapiens OX=9606 GN=BRD2	ENSG00000204256	BRD2			-1.03981	0.00915186	0.240436
+pH fractionation/SP	P62380	TATA box-binding protein-like protein 1 OS=Homo sapiens OX=9606 GN=TBPL1 PE=1 SV=1	ENSG00000028839	TBPL1			3.31746	0.00926967	0.241791
+pH fractionation/SP	O15392	Baculoviral IAP repeat-containing protein 5 OS=Homo sapiens OX=9606 GN=BIRC5 PE=1 SV=3		BIRC5			-3.45273	0.00937083	0.242171
+pH fractionation/SP	Q92833	Protein Jumonji OS=Homo sapiens OX=9606 GN=JARID2 PE=1 SV=2	ENSG00000008083	JARID2			1.70582	0.00956942	0.243901
+pH fractionation/SP	Q9BQ75	Protein CMSS1 OS=Homo sapiens OX=9606 GN=CMSS1 PE=1 SV=2	ENSG00000184220	CMSS1			-1.46158	0.00965405	0.244292
+pH fractionation/SP	P12814	Alpha-actinin-1 OS=Homo sapiens OX=9606 GN=ACTN1 PE=1 SV=2	ENSG00000072110	ACTN1			1.00518	0.00978665	0.244292
-pH fractionation/SP	Q16881	Thioredoxin reductase 1, cytoplasmic OS=Homo sapiens OX=9606 GN=TXNRD1 PE=1 SV=3	ENSG00000198431	TXNRD1			2.66586	0.00989787	0.0420196
-pH fractionation/SP	Q9UI15	Transgelin-3 OS=Homo sapiens OX=9606 GN=TAGLN3 PE=1 SV=2	ENSG00000144834	TAGLN3			1.93783	0.00996107	0.0420806
-pH fractionation/SP	Q9NZD2	Glycolipid transfer protein OS=Homo sapiens OX=9606 GN=GLTP PE=1 SV=3	ENSG00000139433	GLTP			2.43226	0.0100828	0.0424293
+pH fractionation/SP	Q9BTV4	Transmembrane protein 43 OS=Homo sapiens OX=9606 GN=TMEM43 PE=1 SV=1	ENSG00000170876	TMEM43			1.6248	0.0102079	0.250807
+pH fractionation/SP	Q9NXF7	DDB1- and CUL4-associated factor 16 OS=Homo sapiens OX=9606 GN=DCAF16 PE=1 SV=1	ENSG00000163257	DCAF16			2.69156	0.0102878	0.250973
-pH fractionation/SP	Q8IW35-2	Isoform 2 of Centrosomal protein of 97 kDa OS=Homo sapiens OX=9606 GN=CEP97		CEP97			1.58104	0.010324	0.0429737
+pH fractionation/SP	P47914	60S ribosomal protein L29 OS=Homo sapiens OX=9606 GN=RPL29 PE=1 SV=2	ENSG00000162244	RPL29			-1.19641	0.010389	0.252242
+pH fractionation/SP	P82673	28S ribosomal protein S35, mitochondrial OS=Homo sapiens OX=9606 GN=MRPS35 PE=1 SV=1	ENSG00000061794	MRPS35			1.28072	0.0106743	0.255376
-pH fractionation/SP	P84243	Histone H3.3 OS=Homo sapiens OX=9606 GN=H3F3A PE=1 SV=2	ENSG00000132475	H3F3A; H3F3AP4; H3F3B			5.16671	0.0107823	0.0439439
+pH fractionation/SP	P61088	Ubiquitin-conjugating enzyme E2 N OS=Homo sapiens OX=9606 GN=UBE2N PE=1 SV=1	ENSG00000177889	UBE2N			-1.05385	0.0107852	0.255376
+pH fractionation/SP	O60232	Sjoegren syndrome/scleroderma autoantigen 1 OS=Homo sapiens OX=9606 GN=SSSCA1 PE=1 SV=1	ENSG00000173465	SSSCA1			-3.21131	0.010827	0.255376
+pH fractionation/SP	Q7KZN9	Cytochrome c oxidase assembly protein COX15 homolog OS=Homo sapiens OX=9606 GN=COX15 PE=1 SV=1	ENSG00000014919	COX15			-2.49419	0.0108374	0.255376
+pH fractionation/SP	Q68EM7	Rho GTPase-activating protein 17 OS=Homo sapiens OX=9606 GN=ARHGAP17 PE=1 SV=1	ENSG00000140750	ARHGAP17			1.63761	0.0108382	0.255376
+pH fractionation/SP	P48147	Prolyl endopeptidase OS=Homo sapiens OX=9606 GN=PREP PE=1 SV=2	ENSG00000085377	PREP			1.57527	0.010867	0.255376
-pH fractionation/SP	Q9UIS9-12	Isoform 12 of Methyl-CpG-binding domain protein 1 OS=Homo sapiens OX=9606 GN=MBD1	ENSG00000141644	MBD1			1.05477	0.0110815	0.0445848
-pH fractionation/SP	Q9BPZ3	Polyadenylate-binding protein-interacting protein 2 OS=Homo sapiens OX=9606 GN=PAIP2 PE=1 SV=1	ENSG00000120727	PAIP2			-1.32605	0.011105	0.0446376
+pH fractionation/SP	P29965	CD40 ligand OS=Homo sapiens OX=9606 GN=CD40LG PE=1 SV=1	ENSG00000102245	CD40LG			4.29533	0.0111506	0.259106
+pH fractionation/SP	Q2M2I8	AP2-associated protein kinase 1 OS=Homo sapiens OX=9606 GN=AAK1 PE=1 SV=3	ENSG00000115977	AAK1			2.96989	0.011164	0.259106
-pH fractionation/SP	Q9H9H4	Vacuolar protein sorting-associated protein 37B OS=Homo sapiens OX=9606 GN=VPS37B PE=1 SV=1	ENSG00000139722	VPS37B			2.59857	0.0111707	0.0447068
-pH fractionation/SP	O15446-2	Isoform 2 of DNA-directed RNA polymerase I subunit RPA34 OS=Homo sapiens OX=9606 GN=CD3EAP	ENSG00000117877	CD3EAP			-1.07315	0.0112972	0.0450212
-pH fractionation/SP	P63218	Guanine nucleotide-binding protein G(I)/G(S)/G(O) subunit gamma-5 OS=Homo sapiens OX=9606 GN=GNG5 PE=1 SV=3	ENSG00000174021	GNG5			-1.06537	0.011464	0.0453613
+pH fractionation/SP	O43709-3	Isoform 3 of Probable 18S rRNA (guanine-N(7))-methyltransferase OS=Homo sapiens OX=9606 GN=BUD23	ENSG00000071462	WBSCR22; BUD23			-1.98789	0.0117391	0.259106
+pH fractionation/SP	Q8NEZ5	F-box only protein 22 OS=Homo sapiens OX=9606 GN=FBXO22 PE=1 SV=1	ENSG00000167196	FBXO22			1.76037	0.0118951	0.259106
+pH fractionation/SP	O75369-8	Isoform 8 of Filamin-B OS=Homo sapiens OX=9606 GN=FLNB	ENSG00000136068	FLNB			-1.03786	0.0120499	0.259106
+pH fractionation/SP	Q99728	BRCA1-associated RING domain protein 1 OS=Homo sapiens OX=9606 GN=BARD1 PE=1 SV=2	ENSG00000138376	BARD1			-2.69476	0.0120756	0.259106
-pH fractionation/SP	P10415	Apoptosis regulator Bcl-2 OS=Homo sapiens OX=9606 GN=BCL2 PE=1 SV=2	ENSG00000171791	BCL2			1.24034	0.0121917	0.0468178
-pH fractionation/SP	P28799	Granulins OS=Homo sapiens OX=9606 GN=GRN PE=1 SV=2	ENSG00000030582	GRN			1.61318	0.0122699	0.0470382
+pH fractionation/SP	P23588	Eukaryotic translation initiation factor 4B OS=Homo sapiens OX=9606 GN=EIF4B PE=1 SV=2	ENSG00000063046	EIF4B			-1.08688	0.0122807	0.259106
+pH fractionation/SP	Q5T3I0-3	Isoform 3 of G patch domain-containing protein 4 OS=Homo sapiens OX=9606 GN=GPATCH4		GPATCH4			-1.90925	0.0123096	0.259106
+pH fractionation/SP	P35914	Hydroxymethylglutaryl-CoA lyase, mitochondrial OS=Homo sapiens OX=9606 GN=HMGCL PE=1 SV=2	ENSG00000117305	HMGCL			1.51408	0.0123239	0.259106
+pH fractionation/SP	P00846	ATP synthase subunit a OS=Homo sapiens OX=9606 GN=MT-ATP6 PE=1 SV=1	ENSG00000198899	ATP6			1.37804	0.0123408	0.259106
+pH fractionation/SP	Q9P275	Ubiquitin carboxyl-terminal hydrolase 36 OS=Homo sapiens OX=9606 GN=USP36 PE=1 SV=4		USP36			-1.44222	0.0124505	0.259284
+pH fractionation/RefSeq	Q71F23	centromere protein U (CENPU), transcript variant 1, mRNA	ENSG00000151725	CENPU	NM_024629.3_1		-1.17312	0.0125318	0.3447
+pH fractionation/SP	Q7Z7A1	Centriolin OS=Homo sapiens OX=9606 GN=CNTRL PE=1 SV=2	ENSG00000119397	CNTRL			1.09574	0.0125945	0.261221
-pH fractionation/MAJIQ		ENSG00000123146:s:14501736-14502009 OS=Homo sapiens GN=ENSG00000123146	ENSG00000123146	ADGRE5	ENSG00000123146:s:14501736-14502009_14501891-14507154_L1		-1.36227	0.0126347	0.0621302
+pH fractionation/SP	P46013	Proliferation marker protein Ki-67 OS=Homo sapiens OX=9606 GN=MKI67 PE=1 SV=2	ENSG00000148773	MKI67			-1.04946	0.0126621	0.261563
+pH fractionation/SP	O60825	6-phosphofructo-2-kinase/fructose-2,6-bisphosphatase 2 OS=Homo sapiens OX=9606 GN=PFKFB2 PE=1 SV=2	ENSG00000123836	PFKFB2			-1.14871	0.0129621	0.265619
+pH fractionation/SP	O00182	Galectin-9 OS=Homo sapiens OX=9606 GN=LGALS9 PE=1 SV=2	ENSG00000168961	LGALS9			5.58947	0.0131178	0.266677
-pH fractionation/SP	Q9BRQ6	MICOS complex subunit MIC25 OS=Homo sapiens OX=9606 GN=CHCHD6 PE=1 SV=1	ENSG00000159685	CHCHD6			1.21224	0.0131837	0.0492274
-pH fractionation/MAJIQ		ENSG00000242086:t:195415255-195415733 OS=Homo sapiens GN=ENSG00000242086	ENSG00000242086	MUC20-OT1	ENSG00000242086:t:195415255-195415733_195410736-195415404_S2		2.0575	0.0132067	0.0621302
+pH fractionation/SP	Q6SPF0	Atherin OS=Homo sapiens OX=9606 GN=SAMD1 PE=1 SV=1		SAMD1			-1.30493	0.0132523	0.267055
+pH fractionation/SP	Q06136	3-ketodihydrosphingosine reductase OS=Homo sapiens OX=9606 GN=KDSR PE=1 SV=1	ENSG00000119537	KDSR			1.89825	0.0133114	0.267055
-pH fractionation/SP	Q9BYV8	Centrosomal protein of 41 kDa OS=Homo sapiens OX=9606 GN=CEP41 PE=1 SV=1	ENSG00000106477	CEP41			3.2389	0.0133295	0.0493867
+pH fractionation/SP	Q9HC36	rRNA methyltransferase 3, mitochondrial OS=Homo sapiens OX=9606 GN=MRM3 PE=1 SV=2	ENSG00000171861	RNMTL1; MRM3			-1.18817	0.013475	0.267055
+pH fractionation/SP	O43293	Death-associated protein kinase 3 OS=Homo sapiens OX=9606 GN=DAPK3 PE=1 SV=1	ENSG00000167657	DAPK3			1.06872	0.0134929	0.267055
+pH fractionation/SP	Q9BRX5-3	Isoform 3 of DNA replication complex GINS protein PSF3 OS=Homo sapiens OX=9606 GN=GINS3	ENSG00000181938	GINS3			-2.29179	0.0135384	0.267055
+pH fractionation/SP	Q9BQG0-2	Isoform 2 of Myb-binding protein 1A OS=Homo sapiens OX=9606 GN=MYBBP1A	ENSG00000132382	MYBBP1A			-1.10317	0.0135846	0.267055
+pH fractionation/SP	P36402-3	Isoform 1L of Transcription factor 7 OS=Homo sapiens OX=9606 GN=TCF7		TCF7			-3.82254	0.0136056	0.267055
+pH fractionation/RefSeq	P41219	peripherin (PRPH), mRNA	ENSG00000135406	PRPH	NM_006262.3_3		1.82588	0.0136622	0.3447
+pH fractionation/RefSeq	P15313	ATPase H+ transporting V1 subunit B1 (ATP6V1B1), mRNA	ENSG00000116039	ATP6V1B1	NM_001692.3_3		1.20174	0.0137167	0.3447
+pH fractionation/SP	Q92785	Zinc finger protein ubi-d4 OS=Homo sapiens OX=9606 GN=DPF2 PE=1 SV=2	ENSG00000133884	DPF2			-1.11352	0.0138079	0.268965
-pH fractionation/SP	P06729	T-cell surface antigen CD2 OS=Homo sapiens OX=9606 GN=CD2 PE=1 SV=2	ENSG00000116824	CD2			2.08156	0.0138783	0.0506363
+pH fractionation/SP	Q9BYV9	Transcription regulator protein BACH2 OS=Homo sapiens OX=9606 GN=BACH2 PE=1 SV=1	ENSG00000112182	BACH2			2.75594	0.0140827	0.272838
+pH fractionation/SP	Q9NYP9	Protein Mis18-alpha OS=Homo sapiens OX=9606 GN=MIS18A PE=1 SV=1	ENSG00000159055	MIS18A			-2.82221	0.0141216	0.272838
-pH fractionation/RefSeq		Homo sapiens microtubule associated protein 1 light chain 3 alpha (MAP1LC3A), transcript variant 1, mRNA		MAP1LC3A	NM_032514.3_1		-1.72411	0.0144487	0.0472891
+pH fractionation/SP	Q96F15-2	Isoform 2 of GTPase IMAP family member 5 OS=Homo sapiens OX=9606 GN=GIMAP5		GIMAP5			1.42471	0.0145027	0.275175
-pH fractionation/SP	Q12981-1	Isoform 3 of Vesicle transport protein SEC20 OS=Homo sapiens OX=9606 GN=BNIP1	ENSG00000113734	BNIP1			2.20588	0.0145152	0.0519055
-pH fractionation/SP	P49790-3	Isoform 3 of Nuclear pore complex protein Nup153 OS=Homo sapiens OX=9606 GN=NUP153	ENSG00000124789	NUP153			-1.05083	0.0145586	0.0520176
+pH fractionation/SP	Q96JY6-5	Isoform 5 of PDZ and LIM domain protein 2 OS=Homo sapiens OX=9606 GN=PDLIM2	ENSG00000120913	PDLIM2			2.47075	0.0146234	0.276442
+pH fractionation/SP	O43414	ERI1 exoribonuclease 3 OS=Homo sapiens OX=9606 GN=ERI3 PE=1 SV=2	ENSG00000117419	ERI3			-1.21542	0.0149566	0.278904
+pH fractionation/SP	Q9UBF8	Phosphatidylinositol 4-kinase beta OS=Homo sapiens OX=9606 GN=PI4KB PE=1 SV=1	ENSG00000143393	PI4KB			-2.48907	0.0150462	0.279282
-pH fractionation/SP	Q9NXR1-1	Isoform 2 of Nuclear distribution protein nudE homolog 1 OS=Homo sapiens OX=9606 GN=NDE1		NDE1			5.28139	0.0151697	0.0530141
+pH fractionation/SP	Q9Y6J0	Calcineurin-binding protein cabin-1 OS=Homo sapiens OX=9606 GN=CABIN1 PE=1 SV=1	ENSG00000099991	CABIN1			-1.12512	0.0153464	0.280452
+pH fractionation/SP	Q9NY93	Probable ATP-dependent RNA helicase DDX56 OS=Homo sapiens OX=9606 GN=DDX56 PE=1 SV=1	ENSG00000136271	DDX56			-1.05041	0.0155232	0.280452
+pH fractionation/SP	Q9UGN5	Poly [ADP-ribose] polymerase 2 OS=Homo sapiens OX=9606 GN=PARP2 PE=1 SV=2	ENSG00000129484	PARP2			-1.58406	0.0155424	0.280452
-pH fractionation/SP	Q08379	Golgin subfamily A member 2 OS=Homo sapiens OX=9606 GN=GOLGA2 PE=1 SV=3	ENSG00000167110	GOLGA2			-1.38466	0.0155466	0.0536374
+pH fractionation/SP	Q9Y295	Developmentally-regulated GTP-binding protein 1 OS=Homo sapiens OX=9606 GN=DRG1 PE=1 SV=1	ENSG00000185721	DRG1			-1.10358	0.0155475	0.280452
+pH fractionation/SP	E9PAV3	Nascent polypeptide-associated complex subunit alpha, muscle-specific form OS=Homo sapiens OX=9606 GN=NACA PE=1 SV=1	ENSG00000196531	NACA			-1.01586	0.0156035	0.280452
+pH fractionation/SP	P61224	Ras-related protein Rap-1b OS=Homo sapiens OX=9606 GN=RAP1B PE=1 SV=1	ENSG00000127314	RAP1B			1.12739	0.016028	0.2821
+pH fractionation/SP	Q9BVI0	PHD finger protein 20 OS=Homo sapiens OX=9606 GN=PHF20 PE=1 SV=2	ENSG00000025293	PHF20			-2.47604	0.0160791	0.2821
+pH fractionation/SP	Q9UG63-2	Isoform 2 of ATP-binding cassette sub-family F member 2 OS=Homo sapiens OX=9606 GN=ABCF2	ENSG00000033050	ABCF2			-1.09146	0.0162784	0.284621
-pH fractionation/SP	Q8N5N7	39S ribosomal protein L50, mitochondrial OS=Homo sapiens OX=9606 GN=MRPL50 PE=1 SV=2	ENSG00000136897	MRPL50			2.13716	0.0163383	0.0549156
+pH fractionation/SP	Q9UEE9	Craniofacial development protein 1 OS=Homo sapiens OX=9606 GN=CFDP1 PE=1 SV=1	ENSG00000153774	CFDP1			-1.32484	0.0166321	0.28521
+pH fractionation/SP	Q6ZRQ5	Protein MMS22-like OS=Homo sapiens OX=9606 GN=MMS22L PE=1 SV=3	ENSG00000146263	MMS22L			-4.62126	0.0166991	0.28521
+pH fractionation/SP	P78362-2	Isoform 2 of SRSF protein kinase 2 OS=Homo sapiens OX=9606 GN=SRPK2	ENSG00000135250	SRPK2			-1.2502	0.0168937	0.286577
-pH fractionation/MAJIQ		ENSG00000135847:t:180250441-180250521 OS=Homo sapiens GN=ENSG00000135847	ENSG00000135847		ENSG00000135847:t:180250441-180250521_180250521-180257405_S2		1.888	0.0169643	0.0672439
-pH fractionation/SP	Q96BY6	Dedicator of cytokinesis protein 10 OS=Homo sapiens OX=9606 GN=DOCK10 PE=1 SV=3	ENSG00000135905	DOCK10			3.5646	0.0170922	0.0563937
+pH fractionation/SP	P52566	Rho GDP-dissociation inhibitor 2 OS=Homo sapiens OX=9606 GN=ARHGDIB PE=1 SV=3	ENSG00000111348	ARHGDIB			1.09336	0.0171267	0.289366
+pH fractionation/SP	P35241-5	Isoform 5 of Radixin OS=Homo sapiens OX=9606 GN=RDX	ENSG00000137710	RDX			-1.27861	0.0172801	0.289366
+pH fractionation/RefSeq	Q9BYG3	nucleolar protein interacting with the FHA domain of MKI67 (NIFK), mRNA	ENSG00000155438	NIFK	NM_032390.4_2		-1.06661	0.0173281	0.360056
-pH fractionation/SP	Q9BS16	Centromere protein K OS=Homo sapiens OX=9606 GN=CENPK PE=1 SV=1	ENSG00000123219	CENPK			-1.40456	0.0176177	0.0575985
+pH fractionation/SP	P62699	Protein yippee-like 5 OS=Homo sapiens OX=9606 GN=YPEL5 PE=1 SV=1	ENSG00000119801	YPEL5			2.93791	0.0176679	0.292977
-pH fractionation/SP	Q96EL3	39S ribosomal protein L53, mitochondrial OS=Homo sapiens OX=9606 GN=MRPL53 PE=1 SV=1	ENSG00000204822	MRPL53			2.63083	0.0176757	0.0577005
+pH fractionation/SP	P27448-7	Isoform 6 of MAP/microtubule affinity-regulating kinase 3 OS=Homo sapiens OX=9606 GN=MARK3		MARK3			-2.72567	0.0177285	0.292977
+pH fractionation/SP	Q14694-2	Isoform 2 of Ubiquitin carboxyl-terminal hydrolase 10 OS=Homo sapiens OX=9606 GN=USP10		USP10			-1.05818	0.0179091	0.29386
+pH fractionation/SP	P27449	V-type proton ATPase 16 kDa proteolipid subunit OS=Homo sapiens OX=9606 GN=ATP6V0C PE=1 SV=1	ENSG00000185883	ATP6V0C			3.42972	0.0180526	0.29386
+pH fractionation/RefSeq	P17661	desmin (DES), mRNA	ENSG00000175084	DES	NM_001927.3_2		1.25236	0.0180618	0.365114
+pH fractionation/SP	Q9Y4C8	Probable RNA-binding protein 19 OS=Homo sapiens OX=9606 GN=RBM19 PE=1 SV=3	ENSG00000122965	RBM19			-1.09183	0.0181658	0.29386
+pH fractionation/SP	P07311	Acylphosphatase-1 OS=Homo sapiens OX=9606 GN=ACYP1 PE=1 SV=2	ENSG00000119640	ACYP1			-1.39289	0.0181834	0.29386
-pH fractionation/SP	P07910	Heterogeneous nuclear ribonucleoproteins C1/C2 OS=Homo sapiens OX=9606 GN=HNRNPC PE=1 SV=4	ENSG00000092199	HNRNPC			-1.50426	0.0186368	0.0593978
+pH fractionation/SP	Q96QD8	Sodium-coupled neutral amino acid transporter 2 OS=Homo sapiens OX=9606 GN=SLC38A2 PE=1 SV=2	ENSG00000134294	SLC38A2			-2.38194	0.0186831	0.295506
+pH fractionation/SP	P20248	Cyclin-A2 OS=Homo sapiens OX=9606 GN=CCNA2 PE=1 SV=2	ENSG00000145386	CCNA2			-2.53108	0.0187019	0.295506
-pH fractionation/SP	Q9ULX9	Transcription factor MafF OS=Homo sapiens OX=9606 GN=MAFF PE=1 SV=2	ENSG00000185022	MAFF			1.56079	0.0187062	0.059531
+pH fractionation/SP	Q8WU90	Zinc finger CCCH domain-containing protein 15 OS=Homo sapiens OX=9606 GN=ZC3H15 PE=1 SV=1	ENSG00000065548	ZC3H15			-3.53793	0.0187382	0.295506
+pH fractionation/SP	Q8IUH4	Palmitoyltransferase ZDHHC13 OS=Homo sapiens OX=9606 GN=ZDHHC13 PE=1 SV=3	ENSG00000177054	ZDHHC13			2.02824	0.0187667	0.295506
+pH fractionation/SP	Q9NYV6	RNA polymerase I-specific transcription initiation factor RRN3 OS=Homo sapiens OX=9606 GN=RRN3 PE=1 SV=1	ENSG00000278494	RRN3			-2.07215	0.0187988	0.295506
+pH fractionation/RefSeq	Q5T280	SPOUT domain containing methyltransferase 1 (SPOUT1), mRNA	ENSG00000198917	SPOUT1	NM_016390.3_2		-1.37268	0.0189592	0.371135
-pH fractionation/SP	P46527	Cyclin-dependent kinase inhibitor 1B OS=Homo sapiens OX=9606 GN=CDKN1B PE=1 SV=1	ENSG00000111276	CDKN1B			3.54139	0.0190258	0.0602368
+pH fractionation/SP	P80303	Nucleobindin-2 OS=Homo sapiens OX=9606 GN=NUCB2 PE=1 SV=3	ENSG00000070081	NUCB2			1.31758	0.019029	0.295506
+pH fractionation/SP	Q9NVU7	Protein SDA1 homolog OS=Homo sapiens OX=9606 GN=SDAD1 PE=1 SV=3	ENSG00000198301	SDAD1			-1.11887	0.0190355	0.295506
+pH fractionation/SP	Q8N6H7	ADP-ribosylation factor GTPase-activating protein 2 OS=Homo sapiens OX=9606 GN=ARFGAP2 PE=1 SV=1	ENSG00000149182	ARFGAP2			-1.13842	0.0191825	0.295506
+pH fractionation/SP	Q5VYS8	Terminal uridylyltransferase 7 OS=Homo sapiens OX=9606 GN=ZCCHC6 PE=1 SV=1	ENSG00000083223	ZCCHC6			-1.39529	0.0192913	0.295506
+pH fractionation/SP	P07858	Cathepsin B OS=Homo sapiens OX=9606 GN=CTSB PE=1 SV=3	ENSG00000164733	CTSB			2.63202	0.0193917	0.295506
+pH fractionation/SP	O95297	Myelin protein zero-like protein 1 OS=Homo sapiens OX=9606 GN=MPZL1 PE=1 SV=1	ENSG00000197965	MPZL1			2.62203	0.0194973	0.295506
+pH fractionation/SP	O60675	Transcription factor MafK OS=Homo sapiens OX=9606 GN=MAFK PE=1 SV=1	ENSG00000198517	MAFK			-1.03937	0.0195225	0.295506
+pH fractionation/MAJIQ	Q15004	PCNA clamp associated factor [Source:HGNC Symbol;Acc:HGNC:28961]	ENSG00000166803	PCLAF	ENSG00000166803:s:64673157-64673354_64669104-64673157_L2		-2.86246	0.01955	0.98075
-pH fractionation/SP	O95168	NADH dehydrogenase [ubiquinone] 1 beta subcomplex subunit 4 OS=Homo sapiens OX=9606 GN=NDUFB4 PE=1 SV=3	ENSG00000065518	NDUFB4			2.58839	0.0196899	0.0617046
+pH fractionation/SP	Q92930	Ras-related protein Rab-8B OS=Homo sapiens OX=9606 GN=RAB8B PE=1 SV=2	ENSG00000166128	RAB8B			1.28594	0.0196959	0.295506
+pH fractionation/SP	Q9UBU8-2	Isoform 2 of Mortality factor 4-like protein 1 OS=Homo sapiens OX=9606 GN=MORF4L1	ENSG00000185787	MORF4L1			-1.25232	0.0197277	0.295506
+pH fractionation/SP	Q9Y6V7	Probable ATP-dependent RNA helicase DDX49 OS=Homo sapiens OX=9606 GN=DDX49 PE=1 SV=1	ENSG00000105671	DDX49			-1.35619	0.019785	0.295506
-pH fractionation/SP	P29966	Myristoylated alanine-rich C-kinase substrate OS=Homo sapiens OX=9606 GN=MARCKS PE=1 SV=4	ENSG00000277443	MARCKS			1.16014	0.0198483	0.0620808
+pH fractionation/SP	O95573	Long-chain-fatty-acid--CoA ligase 3 OS=Homo sapiens OX=9606 GN=ACSL3 PE=1 SV=3	ENSG00000123983	ACSL3			1.12584	0.0199485	0.295532
+pH fractionation/SP	P48556	26S proteasome non-ATPase regulatory subunit 8 OS=Homo sapiens OX=9606 GN=PSMD8 PE=1 SV=2	ENSG00000099341	PSMD8			1.28663	0.0199528	0.295532
+pH fractionation/SP	Q14444	Caprin-1 OS=Homo sapiens OX=9606 GN=CAPRIN1 PE=1 SV=2	ENSG00000135387	CAPRIN1			-1.37684	0.0203217	0.296609
-pH fractionation/SP	P03928	ATP synthase protein 8 OS=Homo sapiens OX=9606 GN=MT-ATP8 PE=1 SV=1	ENSG00000228253	ATP8			1.23749	0.0203681	0.063076
-pH fractionation/SP	O43678	NADH dehydrogenase [ubiquinone] 1 alpha subcomplex subunit 2 OS=Homo sapiens OX=9606 GN=NDUFA2 PE=1 SV=3	ENSG00000131495	NDUFA2			2.27445	0.0205898	0.0634316
+pH fractionation/SP	Q86Y91-4	Isoform 4 of Kinesin-like protein KIF18B OS=Homo sapiens OX=9606 GN=KIF18B		KIF18B			-3.88506	0.0207043	0.298504
+pH fractionation/SP	P45954	Short/branched chain specific acyl-CoA dehydrogenase, mitochondrial OS=Homo sapiens OX=9606 GN=ACADSB PE=1 SV=1	ENSG00000196177	ACADSB			2.27122	0.0207088	0.298504
+pH fractionation/SP	P46734-3	Isoform 2 of Dual specificity mitogen-activated protein kinase kinase 3 OS=Homo sapiens OX=9606 GN=MAP2K3		MAP2K3			1.83829	0.0207703	0.298504
+pH fractionation/SP	Q9H0S4	Probable ATP-dependent RNA helicase DDX47 OS=Homo sapiens OX=9606 GN=DDX47 PE=1 SV=1	ENSG00000213782	DDX47			-1.00521	0.0208015	0.298504
+pH fractionation/SP	P07305	Histone H1.0 OS=Homo sapiens OX=9606 GN=H1F0 PE=1 SV=3	ENSG00000189060	H1F0			2.00113	0.0209627	0.299977
+pH fractionation/SP	Q4J6C6	Prolyl endopeptidase-like OS=Homo sapiens OX=9606 GN=PREPL PE=1 SV=1	ENSG00000138078	PREPL			-4.15687	0.0212783	0.303646
+pH fractionation/SP	Q6DD88	Atlastin-3 OS=Homo sapiens OX=9606 GN=ATL3 PE=1 SV=1	ENSG00000184743	ATL3			1.15885	0.0216836	0.30857
-pH fractionation/MAJIQ		ENSG00000198538:s:53311129-53311386 OS=Homo sapiens GN=ENSG00000198538	ENSG00000198538	ZNF28	ENSG00000198538:s:53311129-53311386_53304955-53311260_S0		-2.48106	0.0216837	0.0758929
+pH fractionation/SP	Q12849	G-rich sequence factor 1 OS=Homo sapiens OX=9606 GN=GRSF1 PE=1 SV=3	ENSG00000132463	GRSF1			-1.09432	0.0217974	0.30907
-pH fractionation/SP	P82921	28S ribosomal protein S21, mitochondrial OS=Homo sapiens OX=9606 GN=MRPS21 PE=1 SV=3		MRPS21			1.71105	0.02182	0.0655209
+pH fractionation/SP	Q14247	Src substrate cortactin OS=Homo sapiens OX=9606 GN=CTTN PE=1 SV=2	ENSG00000085733	CTTN			2.85611	0.0218394	0.30907
-pH fractionation/SP	Q9Y3D6	Mitochondrial fission 1 protein OS=Homo sapiens OX=9606 GN=FIS1 PE=1 SV=2	ENSG00000214253	FIS1			2.1795	0.0219163	0.0656368
+pH fractionation/SP	Q96DY7	Mdm2-binding protein OS=Homo sapiens OX=9606 GN=MTBP PE=1 SV=1	ENSG00000172167	MTBP			-2.50698	0.0220756	0.309884
-pH fractionation/SP	Q9BY77-2	Isoform 2 of Polymerase delta-interacting protein 3 OS=Homo sapiens OX=9606 GN=POLDIP3	ENSG00000100227	POLDIP3			-1.69783	0.0221025	0.0659099
+pH fractionation/RefSeq	Q8TE73	dynein axonemal heavy chain 5 (DNAH5), mRNA	ENSG00000039139	DNAH5	NM_001369.2_3		-4.6457	0.0223979	0.397978
+pH fractionation/SP	P61073-2	Isoform 2 of C-X-C chemokine receptor type 4 OS=Homo sapiens OX=9606 GN=CXCR4	ENSG00000121966	CXCR4			-3.23342	0.0225971	0.315435
+pH fractionation/SP	Q9NY61	Protein AATF OS=Homo sapiens OX=9606 GN=AATF PE=1 SV=1	ENSG00000276072	AATF			-1.59714	0.0227771	0.317084
+pH fractionation/SP	P42898-2	Isoform 2 of Methylenetetrahydrofolate reductase OS=Homo sapiens OX=9606 GN=MTHFR	ENSG00000177000	MTHFR			1.1886	0.0229549	0.317832
+pH fractionation/SP	Q9HD33	39S ribosomal protein L47, mitochondrial OS=Homo sapiens OX=9606 GN=MRPL47 PE=1 SV=2	ENSG00000136522	MRPL47			-3.69772	0.0233052	0.320948
+pH fractionation/SP	P10619	Lysosomal protective protein OS=Homo sapiens OX=9606 GN=CTSA PE=1 SV=2	ENSG00000064601	CTSA			1.55473	0.0236713	0.323512
+pH fractionation/SP	P61158	Actin-related protein 3 OS=Homo sapiens OX=9606 GN=ACTR3 PE=1 SV=3	ENSG00000115091	ACTR3			1.15704	0.0236843	0.323512
+pH fractionation/SP	Q8WVC6	Dephospho-CoA kinase domain-containing protein OS=Homo sapiens OX=9606 GN=DCAKD PE=1 SV=1	ENSG00000172992	DCAKD			1.42839	0.023744	0.323512
+pH fractionation/SP	Q9H2Y7	Zinc finger protein 106 OS=Homo sapiens OX=9606 GN=ZNF106 PE=1 SV=1	ENSG00000103994	ZFP106; ZNF106			-2.81594	0.0240485	0.325927
+pH fractionation/SP	Q9BT73	Proteasome assembly chaperone 3 OS=Homo sapiens OX=9606 GN=PSMG3 PE=1 SV=1	ENSG00000157778	PSMG3			-3.93329	0.0241852	0.326054
-pH fractionation/SP	Q5PRF9	Protein Smaug homolog 2 OS=Homo sapiens OX=9606 GN=SAMD4B PE=1 SV=1	ENSG00000179134	SAMD4B			-1.60511	0.0243323	0.0705098
+pH fractionation/SP	O43592	Exportin-T OS=Homo sapiens OX=9606 GN=XPOT PE=1 SV=2	ENSG00000184575	XPOT			1.09007	0.0244428	0.327802
-pH fractionation/SP	Q9H0G5	Nuclear speckle splicing regulatory protein 1 OS=Homo sapiens OX=9606 GN=NSRP1 PE=1 SV=1	ENSG00000126653	NSRP1			-3.17041	0.0244574	0.070777
-pH fractionation/SP	Q9UJW0-3	Isoform 3 of Dynactin subunit 4 OS=Homo sapiens OX=9606 GN=DCTN4	ENSG00000132912	DCTN4			-1.02648	0.0245436	0.0708717
+pH fractionation/SP	Q96RL1	BRCA1-A complex subunit RAP80 OS=Homo sapiens OX=9606 GN=UIMC1 PE=1 SV=2	ENSG00000087206	UIMC1			-1.2548	0.024898	0.330873
-pH fractionation/SP	P26358	DNA (cytosine-5)-methyltransferase 1 OS=Homo sapiens OX=9606 GN=DNMT1 PE=1 SV=2	ENSG00000130816	DNMT1			-2.47363	0.0249126	0.0716133
+pH fractionation/SP	Q9UHQ9	NADH-cytochrome b5 reductase 1 OS=Homo sapiens OX=9606 GN=CYB5R1 PE=1 SV=1	ENSG00000159348	CYB5R1			2.03278	0.0249128	0.330873
+pH fractionation/SP	Q92784	Zinc finger protein DPF3 OS=Homo sapiens OX=9606 GN=DPF3 PE=1 SV=3	ENSG00000205683	DPF3			4.48071	0.0254058	0.334241
+pH fractionation/SP	O95503	Chromobox protein homolog 6 OS=Homo sapiens OX=9606 GN=CBX6 PE=1 SV=1	ENSG00000183741	CBX6			3.08974	0.0255643	0.334241
+pH fractionation/SP	P0DPB5	Protein POLR1D, isoform 2 OS=Homo sapiens OX=9606 GN=POLR1D PE=1 SV=1		POLR1D			-1.23221	0.0256755	0.334241
+pH fractionation/SP	Q4G0N4	NAD kinase 2, mitochondrial OS=Homo sapiens OX=9606 GN=NADK2 PE=1 SV=2	ENSG00000152620	NADK2; NADKD1			1.26926	0.0257059	0.334241
+pH fractionation/SP	Q9Y5L4	Mitochondrial import inner membrane translocase subunit Tim13 OS=Homo sapiens OX=9606 GN=TIMM13 PE=1 SV=1	ENSG00000099800	TIMM13			-1.79585	0.0265456	0.340835
+pH fractionation/MAJIQ	P01893	major histocompatibility complex, class I, H (pseudogene) [Source:HGNC Symbol;Acc:HGNC:4965]	ENSG00000206341	HLA-H	ENSG00000206341:s:29856244-29857081_29856519-29911899_L2		3.89693	0.0267449	0.98075
+pH fractionation/SP	O95470	Sphingosine-1-phosphate lyase 1 OS=Homo sapiens OX=9606 GN=SGPL1 PE=1 SV=3	ENSG00000166224	SGPL1			1.33859	0.0269312	0.344242
+pH fractionation/SP	Q5TAQ9	DDB1- and CUL4-associated factor 8 OS=Homo sapiens OX=9606 GN=DCAF8 PE=1 SV=1	ENSG00000132716	DCAF8			1.21412	0.0269453	0.344242
+pH fractionation/SP	Q8WYJ6	Septin-1 OS=Homo sapiens OX=9606 GN=SEPT1 PE=1 SV=2		SEPT1			1.24366	0.0271471	0.344583
+pH fractionation/SP	Q14493	Histone RNA hairpin-binding protein OS=Homo sapiens OX=9606 GN=SLBP PE=1 SV=1	ENSG00000163950	SLBP			-1.74535	0.0271738	0.344583
+pH fractionation/SP	Q96BK5	PIN2/TERF1-interacting telomerase inhibitor 1 OS=Homo sapiens OX=9606 GN=PINX1 PE=1 SV=2	ENSG00000254093	PINX1			-1.31363	0.0272448	0.344631
+pH fractionation/SP	Q9BVC3	Sister chromatid cohesion protein DCC1 OS=Homo sapiens OX=9606 GN=DSCC1 PE=1 SV=2	ENSG00000136982	DSCC1			-2.25105	0.0273473	0.34491
+pH fractionation/SP	P21281	V-type proton ATPase subunit B, brain isoform OS=Homo sapiens OX=9606 GN=ATP6V1B2 PE=1 SV=3	ENSG00000147416	ATP6V1B2			1.07895	0.0275538	0.34491
-pH fractionation/SP	Q15047	Histone-lysine N-methyltransferase SETDB1 OS=Homo sapiens OX=9606 GN=SETDB1 PE=1 SV=1	ENSG00000143379	SETDB1			-5.93432	0.027745	0.0766316
+pH fractionation/SP	O60234	Glia maturation factor gamma OS=Homo sapiens OX=9606 GN=GMFG PE=1 SV=1	ENSG00000130755	GMFG			1.30281	0.0278014	0.34491
+pH fractionation/SP	Q5UIP0	Telomere-associated protein RIF1 OS=Homo sapiens OX=9606 GN=RIF1 PE=1 SV=2	ENSG00000080345	RIF1			-1.73814	0.0278296	0.34491
+pH fractionation/MAJIQ	Q9H2Y7	zinc finger protein 106 [Source:HGNC Symbol;Acc:HGNC:12886]	ENSG00000103994	ZNF106	ENSG00000103994:t:42740270-42740903_42740903-42741969_L1		-1.6666	0.0279703	0.98075
+pH fractionation/SP	Q96GN5	Cell division cycle-associated 7-like protein OS=Homo sapiens OX=9606 GN=CDCA7L PE=1 SV=2	ENSG00000164649	CDCA7L			-1.04853	0.0284905	0.348601
+pH fractionation/SP	P00491	Purine nucleoside phosphorylase OS=Homo sapiens OX=9606 GN=PNP PE=1 SV=2	ENSG00000198805	PNP			1.02421	0.0288313	0.349888
+pH fractionation/SP	Q5JTV8-3	Isoform 3 of Torsin-1A-interacting protein 1 OS=Homo sapiens OX=9606 GN=TOR1AIP1	ENSG00000143337	TOR1AIP1			1.02764	0.0289094	0.349888
+pH fractionation/SP	O95825	Quinone oxidoreductase-like protein 1 OS=Homo sapiens OX=9606 GN=CRYZL1 PE=1 SV=2	ENSG00000205758	CRYZL1			-3.25799	0.0290285	0.349888
+pH fractionation/SP	Q32P44	Echinoderm microtubule-associated protein-like 3 OS=Homo sapiens OX=9606 GN=EML3 PE=1 SV=1	ENSG00000149499	EML3			1.34112	0.0291208	0.349888
+pH fractionation/SP	Q8NBT0	POC1 centriolar protein homolog A OS=Homo sapiens OX=9606 GN=POC1A PE=1 SV=2	ENSG00000164087	POC1A			-1.7282	0.0291653	0.349888
+pH fractionation/SP	Q9UBS8	E3 ubiquitin-protein ligase RNF14 OS=Homo sapiens OX=9606 GN=RNF14 PE=1 SV=1	ENSG00000013561	RNF14			1.88547	0.0291835	0.349888
+pH fractionation/SP	Q9Y6D6	Brefeldin A-inhibited guanine nucleotide-exchange protein 1 OS=Homo sapiens OX=9606 GN=ARFGEF1 PE=1 SV=2	ENSG00000066777	ARFGEF1			1.02947	0.0294178	0.35072
-pH fractionation/SP	P24864	G1/S-specific cyclin-E1 OS=Homo sapiens OX=9606 GN=CCNE1 PE=1 SV=2	ENSG00000105173	CCNE1			-1.74194	0.0295007	0.0794491
+pH fractionation/SP	O15260	Surfeit locus protein 4 OS=Homo sapiens OX=9606 GN=SURF4 PE=1 SV=3	ENSG00000280951	SURF4			1.41384	0.0296899	0.352903
+pH fractionation/SP	Q99081-3	Isoform 3 of Transcription factor 12 OS=Homo sapiens OX=9606 GN=TCF12	ENSG00000140262	TCF12			-1.31138	0.0297659	0.352988
-pH fractionation/MAJIQ		ENSG00000108292:s:36871865-36872588 OS=Homo sapiens GN=ENSG00000108292	ENSG00000108292		ENSG00000108292:s:36871865-36872588_36872081-36872620_L0		2.957	0.0303616	0.0960479
+pH fractionation/SP	Q13459	Unconventional myosin-IXb OS=Homo sapiens OX=9606 GN=MYO9B PE=1 SV=3		MYO9B			-2.46326	0.0304218	0.356638
+pH fractionation/SP	Q9Y2I7	1-phosphatidylinositol 3-phosphate 5-kinase OS=Homo sapiens OX=9606 GN=PIKFYVE PE=1 SV=3	ENSG00000115020	PIKFYVE			2.04143	0.0305217	0.356783
+pH fractionation/RefSeq	P35716	SRY-box 11 (SOX11), mRNA	ENSG00000176887	SOX11	NM_003108.3_1		3.26487	0.0305495	0.456881
+pH fractionation/SP	Q969M3-3	Isoform 3 of Protein YIPF5 OS=Homo sapiens OX=9606 GN=YIPF5		YIPF5			2.00444	0.0309686	0.358941
+pH fractionation/SP	P20290	Transcription factor BTF3 OS=Homo sapiens OX=9606 GN=BTF3 PE=1 SV=1	ENSG00000145741	BTF3			-1.40058	0.0311067	0.359728
+pH fractionation/SP	P31323	cAMP-dependent protein kinase type II-beta regulatory subunit OS=Homo sapiens OX=9606 GN=PRKAR2B PE=1 SV=3	ENSG00000005249	PRKAR2B			-2.04768	0.031601	0.362986
+pH fractionation/SP	Q9NQC3	Reticulon-4 OS=Homo sapiens OX=9606 GN=RTN4 PE=1 SV=2	ENSG00000115310	RTN4			1.54357	0.0318596	0.364539
+pH fractionation/SP	Q9Y5P4-3	Isoform 3 of Collagen type IV alpha-3-binding protein OS=Homo sapiens OX=9606 GN=COL4A3BP	ENSG00000113163	COL4A3BP			1.42252	0.0325073	0.368441
+pH fractionation/RefSeq		glutamate dehydrogenase 1 pseudogene 7 (GLUD1P7), non-coding RNA		GLUD1P7	NR_111968.1_2		1.26684	0.032536	0.480209
+pH fractionation/SP	Q9H0U3	Magnesium transporter protein 1 OS=Homo sapiens OX=9606 GN=MAGT1 PE=1 SV=1	ENSG00000102158	MAGT1			1.5362	0.032632	0.369037
-pH fractionation/SP	Q86XP3-2	Isoform 2 of ATP-dependent RNA helicase DDX42 OS=Homo sapiens OX=9606 GN=DDX42	ENSG00000198231	DDX42			-1.1412	0.0328129	0.084564
+pH fractionation/SP	Q13643	Four and a half LIM domains protein 3 OS=Homo sapiens OX=9606 GN=FHL3 PE=1 SV=4	ENSG00000183386	FHL3			1.97025	0.032866	0.370645
+pH fractionation/SP	Q96BH1	E3 ubiquitin-protein ligase RNF25 OS=Homo sapiens OX=9606 GN=RNF25 PE=1 SV=1	ENSG00000163481	RNF25			3.04715	0.0329993	0.370645
+pH fractionation/SP	P49257	Protein ERGIC-53 OS=Homo sapiens OX=9606 GN=LMAN1 PE=1 SV=2	ENSG00000074695	LMAN1			1.19658	0.0330636	0.370645
+pH fractionation/SP	P46934-4	Isoform 4 of E3 ubiquitin-protein ligase NEDD4 OS=Homo sapiens OX=9606 GN=NEDD4	ENSG00000069869	NEDD4			1.51519	0.0335458	0.372293
+pH fractionation/SP	O96013	Serine/threonine-protein kinase PAK 4 OS=Homo sapiens OX=9606 GN=PAK4 PE=1 SV=1	ENSG00000130669	PAK4			1.4174	0.033574	0.372293
+pH fractionation/SP	O75995	SAM and SH3 domain-containing protein 3 OS=Homo sapiens OX=9606 GN=SASH3 PE=1 SV=2	ENSG00000122122	SASH3			1.20511	0.0340845	0.375516
-pH fractionation/SP	P50851	Lipopolysaccharide-responsive and beige-like anchor protein OS=Homo sapiens OX=9606 GN=LRBA PE=1 SV=4	ENSG00000198589	LRBA			2.23543	0.0341462	0.0864996
+pH fractionation/SP	Q9ULM6	CCR4-NOT transcription complex subunit 6 OS=Homo sapiens OX=9606 GN=CNOT6 PE=1 SV=2	ENSG00000113300	CNOT6			-3.05416	0.0344807	0.378004
-pH fractionation/SP	Q9UKA9-3	Isoform 3 of Polypyrimidine tract-binding protein 2 OS=Homo sapiens OX=9606 GN=PTBP2	ENSG00000117569	PTBP2			-1.28692	0.0345801	0.0872263
+pH fractionation/SP	Q9BRJ7	Tudor-interacting repair regulator protein OS=Homo sapiens OX=9606 GN=NUDT16L1 PE=1 SV=1	ENSG00000168101	NUDT16L1			-1.2669	0.0349839	0.378004
+pH fractionation/RefSeq	Q7Z4I7	LIM zinc finger domain containing 2 (LIMS2), transcript variant 1, mRNA	ENSG00000072163	LIMS2	NM_001136037.2_1		2.4806	0.0350365	0.486168
+pH fractionation/SP	O94804	Serine/threonine-protein kinase 10 OS=Homo sapiens OX=9606 GN=STK10 PE=1 SV=1	ENSG00000072786	STK10			-1.48364	0.035188	0.378714
+pH fractionation/RefSeq	Q6DKI2	galectin 9C (LGALS9C), mRNA	ENSG00000171916	LGALS9C	NM_001040078.2_1		2.2045	0.0351995	0.486168
+pH fractionation/SP	Q99943	1-acyl-sn-glycerol-3-phosphate acyltransferase alpha OS=Homo sapiens OX=9606 GN=AGPAT1 PE=1 SV=2	ENSG00000235758	AGPAT1			2.51915	0.0354637	0.380815
+pH fractionation/SP	P53365	Arfaptin-2 OS=Homo sapiens OX=9606 GN=ARFIP2 PE=1 SV=1	ENSG00000132254	ARFIP2			2.46725	0.0355318	0.380815
+pH fractionation/RefSeq		nascent polypeptide associated complex alpha subunit pseudogene 1 (NACAP1), non-coding RNA		NACAP1	NR_002182.1_2		-1.43926	0.0356326	0.486168
-pH fractionation/SP	P03923	NADH-ubiquinone oxidoreductase chain 6 OS=Homo sapiens OX=9606 GN=MT-ND6 PE=1 SV=2	ENSG00000198695	ND6			4.0436	0.035691	0.0887436
+pH fractionation/SP	Q9BR77	Coiled-coil domain-containing protein 77 OS=Homo sapiens OX=9606 GN=CCDC77 PE=1 SV=1	ENSG00000120647	CCDC77			-1.45586	0.0361168	0.383872
+pH fractionation/SP	Q9BVK2	Probable dolichyl pyrophosphate Glc1Man9GlcNAc2 alpha-1,3-glucosyltransferase OS=Homo sapiens OX=9606 GN=ALG8 PE=1 SV=2	ENSG00000159063	ALG8			1.37372	0.0365445	0.386813
+pH fractionation/SP	Q8IWI9-4	Isoform 4 of MAX gene-associated protein OS=Homo sapiens OX=9606 GN=MGA	ENSG00000174197	MGA			-1.55238	0.0368413	0.387699
+pH fractionation/SP	Q9BQE5	Apolipoprotein L2 OS=Homo sapiens OX=9606 GN=APOL2 PE=1 SV=1		APOL2			1.62439	0.036931	0.387699
+pH fractionation/SP	P20930	Filaggrin OS=Homo sapiens OX=9606 GN=FLG PE=1 SV=3	ENSG00000143631	FLG			2.69896	0.0371635	0.388099
+pH fractionation/SP	Q6NYC8	Phostensin OS=Homo sapiens OX=9606 GN=PPP1R18 PE=1 SV=1	ENSG00000229998	PPP1R18			2.49874	0.0371963	0.388099
+pH fractionation/SP	P31949	Protein S100-A11 OS=Homo sapiens OX=9606 GN=S100A11 PE=1 SV=2	ENSG00000163191	S100A11			-1.66451	0.037897	0.394258
-pH fractionation/SP	O95169	NADH dehydrogenase [ubiquinone] 1 beta subcomplex subunit 8, mitochondrial OS=Homo sapiens OX=9606 GN=NDUFB8 PE=1 SV=1	ENSG00000166136	NDUFB8			4.91172	0.038051	0.0926861
+pH fractionation/SP	Q9NRL2	Bromodomain adjacent to zinc finger domain protein 1A OS=Homo sapiens OX=9606 GN=BAZ1A PE=1 SV=2	ENSG00000198604	BAZ1A			-1.05219	0.0381155	0.395173
+pH fractionation/SP	P09326	CD48 antigen OS=Homo sapiens OX=9606 GN=CD48 PE=1 SV=2	ENSG00000117091	CD48			4.05525	0.0384043	0.395865
-pH fractionation/SP	Q9NUL5	Repressor of yield of DENV protein OS=Homo sapiens OX=9606 GN=RYDEN PE=1 SV=2	ENSG00000130813	C19orf66			1.34539	0.0385038	0.0934194
+pH fractionation/SP	Q96H20	Vacuolar-sorting protein SNF8 OS=Homo sapiens OX=9606 GN=SNF8 PE=1 SV=1	ENSG00000159210	SNF8			1.99199	0.0386397	0.395902
+pH fractionation/RefSeq		RPS10-NUDT3 readthrough (RPS10-NUDT3), mRNA	ENSG00000270800	RPS10-NUDT3	NM_001202470.2_1		-1.04537	0.0389253	0.498057
+pH fractionation/RefSeq	P23769	GATA binding protein 2 (GATA2), transcript variant 3, mRNA	ENSG00000179348	GATA2	NM_001145662.1_1		2.18304	0.03903	0.498057
+pH fractionation/SP	P42768	Wiskott-Aldrich syndrome protein OS=Homo sapiens OX=9606 GN=WAS PE=1 SV=4	ENSG00000015285	WAS			-1.75842	0.0392779	0.398457
+pH fractionation/SP	Q8WX93	Palladin OS=Homo sapiens OX=9606 GN=PALLD PE=1 SV=3		PALLD			-1.58053	0.0394557	0.398682
+pH fractionation/SP	Q9ULW3	Activator of basal transcription 1 OS=Homo sapiens OX=9606 GN=ABT1 PE=1 SV=1	ENSG00000146109	ABT1			-1.07552	0.0397138	0.4005
-pH fractionation/SP	P51397	Death-associated protein 1 OS=Homo sapiens OX=9606 GN=DAP PE=1 SV=3	ENSG00000112977	DAP			3.06554	0.0397627	0.0949956
+pH fractionation/SP	P08865	40S ribosomal protein SA OS=Homo sapiens OX=9606 GN=RPSA PE=1 SV=4	ENSG00000168028	RPSA			-1.09661	0.0399221	0.401022
-pH fractionation/SP	Q8IU81	Interferon regulatory factor 2-binding protein 1 OS=Homo sapiens OX=9606 GN=IRF2BP1 PE=1 SV=1	ENSG00000170604	IRF2BP1			3.87667	0.0404421	0.0956975
+pH fractionation/SP	Q9P2K5-2	Isoform 2 of Myelin expression factor 2 OS=Homo sapiens OX=9606 GN=MYEF2		MYEF2			1.52894	0.0406206	0.405651
+pH fractionation/SP	Q9BQA9	Uncharacterized protein C17orf62 OS=Homo sapiens OX=9606 GN=C17orf62 PE=1 SV=1	ENSG00000178927	C17orf62			-2.77725	0.0409378	0.408024
+pH fractionation/SP	O96005	Cleft lip and palate transmembrane protein 1 OS=Homo sapiens OX=9606 GN=CLPTM1 PE=1 SV=1	ENSG00000104853	CLPTM1			2.57198	0.0412749	0.408482
+pH fractionation/SP	P09488	Glutathione S-transferase Mu 1 OS=Homo sapiens OX=9606 GN=GSTM1 PE=1 SV=3	ENSG00000134184	GSTM1			1.14097	0.0413764	0.408482
-pH fractionation/MAJIQ		ENSG00000255339:t:102276631-102276800 OS=Homo sapiens GN=ENSG00000255339	ENSG00000255339	AL133352.1	ENSG00000255339:t:102276631-102276800_102276717-102286732_S1		4.3782	0.041497	0.117694
+pH fractionation/SP	Q02338	D-beta-hydroxybutyrate dehydrogenase, mitochondrial OS=Homo sapiens OX=9606 GN=BDH1 PE=1 SV=3	ENSG00000275544	BDH1			-2.1082	0.0416191	0.408482
+pH fractionation/SP	Q9NXE8	Pre-mRNA-splicing factor CWC25 homolog OS=Homo sapiens OX=9606 GN=CWC25 PE=1 SV=1	ENSG00000273559	CWC25			-1.34821	0.0416462	0.408482
+pH fractionation/SP	Q8WVV9	Heterogeneous nuclear ribonucleoprotein L-like OS=Homo sapiens OX=9606 GN=HNRNPLL PE=1 SV=1	ENSG00000143889	HNRNPLL; HNRPLL			1.08886	0.0417317	0.408482
+pH fractionation/SP	Q9UPN9-2	Isoform Beta of E3 ubiquitin-protein ligase TRIM33 OS=Homo sapiens OX=9606 GN=TRIM33	ENSG00000197323	TRIM33			-1.98289	0.0419892	0.408482
+pH fractionation/SP	P48200	Iron-responsive element-binding protein 2 OS=Homo sapiens OX=9606 GN=IREB2 PE=1 SV=3		IREB2			-3.24661	0.0420203	0.408482
+pH fractionation/SP	P13646	Keratin, type I cytoskeletal 13 OS=Homo sapiens OX=9606 GN=KRT13 PE=1 SV=4	ENSG00000171401	KRT13			2.83021	0.0422267	0.409711
+pH fractionation/SP	P09496-2	Isoform Non-brain of Clathrin light chain A OS=Homo sapiens OX=9606 GN=CLTA	ENSG00000122705	CLTA			3.14211	0.0430306	0.415935
+pH fractionation/SP	Q9Y296	Trafficking protein particle complex subunit 4 OS=Homo sapiens OX=9606 GN=TRAPPC4 PE=1 SV=1	ENSG00000280495	TRAPPC4			2.06437	0.0434984	0.41687
+pH fractionation/SP	O00299	Chloride intracellular channel protein 1 OS=Homo sapiens OX=9606 GN=CLIC1 PE=1 SV=4	ENSG00000213719	CLIC1			1.06235	0.0436393	0.41687
+pH fractionation/SP	Q9NZ45	CDGSH iron-sulfur domain-containing protein 1 OS=Homo sapiens OX=9606 GN=CISD1 PE=1 SV=1	ENSG00000122873	CISD1			1.00828	0.0440014	0.417905
+pH fractionation/SP	O75081	Protein CBFA2T3 OS=Homo sapiens OX=9606 GN=CBFA2T3 PE=1 SV=2	ENSG00000129993	CBFA2T3			-2.16684	0.0441317	0.417905
+pH fractionation/SP	P31146	Coronin-1A OS=Homo sapiens OX=9606 GN=CORO1A PE=1 SV=4	ENSG00000102879	CORO1A			1.35216	0.0442296	0.41806
+pH fractionation/RefSeq	Q9H6R7	WD repeat and coiled coil containing (WDCP), transcript variant 1, mRNA	ENSG00000163026	WDCP	NM_025203.2_2		-3.00961	0.0444238	0.524115
+pH fractionation/RefSeq	O15069	NAC alpha domain containing (NACAD), mRNA	ENSG00000136274	NACAD	NM_001146334.1_3		-1.89783	0.0445743	0.524115
+pH fractionation/SP	P38398-7	Isoform 7 of Breast cancer type 1 susceptibility protein OS=Homo sapiens OX=9606 GN=BRCA1	ENSG00000012048	BRCA1			-3.18256	0.0446654	0.419855
+pH fractionation/SP	Q8NCN4	E3 ubiquitin-protein ligase RNF169 OS=Homo sapiens OX=9606 GN=RNF169 PE=1 SV=2	ENSG00000166439	RNF169			-1.18385	0.0450778	0.421383
+pH fractionation/SP	Q96N66	Lysophospholipid acyltransferase 7 OS=Homo sapiens OX=9606 GN=MBOAT7 PE=1 SV=2	ENSG00000278519	MBOAT7			2.42014	0.0451739	0.421383
+pH fractionation/SP	Q6P179	Endoplasmic reticulum aminopeptidase 2 OS=Homo sapiens OX=9606 GN=ERAP2 PE=1 SV=2	ENSG00000164308	ERAP2			-1.86935	0.0452757	0.421383
+pH fractionation/SP	Q9BVT8	Transmembrane and ubiquitin-like domain-containing protein 1 OS=Homo sapiens OX=9606 GN=TMUB1 PE=1 SV=1	ENSG00000164897	TMUB1			1.2352	0.045479	0.421383
+pH fractionation/SP	Q9H165	B-cell lymphoma/leukemia 11A OS=Homo sapiens OX=9606 GN=BCL11A PE=1 SV=2	ENSG00000119866	BCL11A			-2.18436	0.0457327	0.421383
+pH fractionation/SP	Q96FZ2	Embryonic stem cell-specific 5-hydroxymethylcytosine-binding protein OS=Homo sapiens OX=9606 GN=HMCES PE=1 SV=1	ENSG00000183624	C3orf37; HMCES			1.68479	0.0460699	0.421934
+pH fractionation/SP	O43264	Centromere/kinetochore protein zw10 homolog OS=Homo sapiens OX=9606 GN=ZW10 PE=1 SV=3	ENSG00000086827	ZW10			1.33417	0.0462986	0.422042
-pH fractionation/SP	Q13064	Probable E3 ubiquitin-protein ligase makorin-3 OS=Homo sapiens OX=9606 GN=MKRN3 PE=1 SV=1	ENSG00000179455	MKRN3			2.26648	0.0463789	0.104602
+pH fractionation/SP	Q8TCT9	Minor histocompatibility antigen H13 OS=Homo sapiens OX=9606 GN=HM13 PE=1 SV=1	ENSG00000101294	HM13			1.53012	0.0465641	0.423451
-pH fractionation/SP	A6NJ78	Probable methyltransferase-like protein 15 OS=Homo sapiens OX=9606 GN=METTL15 PE=1 SV=1	ENSG00000169519	METTL15			-3.06055	0.0466059	0.104815
+pH fractionation/SP	Q9NZR1	Tropomodulin-2 OS=Homo sapiens OX=9606 GN=TMOD2 PE=1 SV=1	ENSG00000128872	TMOD2			1.14451	0.0467837	0.423451
+pH fractionation/RefSeq		hydroxysteroid 17-beta dehydrogenase 7 pseudogene 2 (HSD17B7P2), non-coding RNA	ENSG00000099251	HSD17B7P2	NR_003086.1_3		2.36188	0.0468602	0.525874
-pH fractionation/SP	Q96SK2	Transmembrane protein 209 OS=Homo sapiens OX=9606 GN=TMEM209 PE=1 SV=2	ENSG00000146842	TMEM209			-2.6662	0.0471117	0.105566
+pH fractionation/SP	Q16864-2	Isoform 2 of V-type proton ATPase subunit F OS=Homo sapiens OX=9606 GN=ATP6V1F	ENSG00000128524	ATP6V1F			1.54343	0.0472298	0.425234
+pH fractionation/SP	Q9Y2L9-3	Isoform 3 of Leucine-rich repeat and calponin homology domain-containing protein 1 OS=Homo sapiens OX=9606 GN=LRCH1	ENSG00000136141	LRCH1			2.27502	0.047514	0.42581
-pH fractionation/SP	Q9H3R5	Centromere protein H OS=Homo sapiens OX=9606 GN=CENPH PE=1 SV=1	ENSG00000153044	CENPH			-1.30728	0.0477132	0.106416
+pH fractionation/SP	Q9NPJ6	Mediator of RNA polymerase II transcription subunit 4 OS=Homo sapiens OX=9606 GN=MED4 PE=1 SV=1	ENSG00000136146	MED4			-1.45766	0.0477935	0.427305
-pH fractionation/SP	Q8WWI1	LIM domain only protein 7 OS=Homo sapiens OX=9606 GN=LMO7 PE=1 SV=3		LMO7			-1.3299	0.0480015	0.106508
+pH fractionation/SP	Q15208	Serine/threonine-protein kinase 38 OS=Homo sapiens OX=9606 GN=STK38 PE=1 SV=1	ENSG00000112079	STK38			3.81682	0.0481753	0.428325
+pH fractionation/SP	Q9BRP1	Programmed cell death protein 2-like OS=Homo sapiens OX=9606 GN=PDCD2L PE=1 SV=1	ENSG00000126249	PDCD2L			-3.52611	0.0482018	0.428325
+pH fractionation/SP	O95757	Heat shock 70 kDa protein 4L OS=Homo sapiens OX=9606 GN=HSPA4L PE=1 SV=3	ENSG00000164070	HSPA4L			-1.16037	0.0484678	0.428325
+pH fractionation/SP	P53634	Dipeptidyl peptidase 1 OS=Homo sapiens OX=9606 GN=CTSC PE=1 SV=2	ENSG00000109861	CTSC			1.44178	0.0485276	0.428325
-pH fractionation/SP	Q96AT1	Uncharacterized protein KIAA1143 OS=Homo sapiens OX=9606 GN=KIAA1143 PE=1 SV=2	ENSG00000281665	KIAA1143			2.06873	0.0485767	0.107452
+pH fractionation/SP	Q969Y2-2	Isoform 2 of tRNA modification GTPase GTPBP3, mitochondrial OS=Homo sapiens OX=9606 GN=GTPBP3	ENSG00000130299	GTPBP3			2.12293	0.0487055	0.428325
+pH fractionation/SP	Q9Y3Q3	Transmembrane emp24 domain-containing protein 3 OS=Homo sapiens OX=9606 GN=TMED3 PE=1 SV=1	ENSG00000166557	TMED3			-2.25596	0.0487137	0.428325
+pH fractionation/SP	O94925-3	Isoform 3 of Glutaminase kidney isoform, mitochondrial OS=Homo sapiens OX=9606 GN=GLS	ENSG00000115419	GLS			1.24874	0.0488272	0.428325
+pH fractionation/SP	Q13627	Dual specificity tyrosine-phosphorylation-regulated kinase 1A OS=Homo sapiens OX=9606 GN=DYRK1A PE=1 SV=2	ENSG00000157540	DYRK1A			1.10154	0.0491383	0.430317
+pH fractionation/SP	P49005	DNA polymerase delta subunit 2 OS=Homo sapiens OX=9606 GN=POLD2 PE=1 SV=1	ENSG00000106628	POLD2			-1.51189	0.04952	0.430409
+pH fractionation/SP	P08670	Vimentin OS=Homo sapiens OX=9606 GN=VIM PE=1 SV=4	ENSG00000026025	VIM			1.44314	0.0497787	0.43077
+pH fractionation/SP	Q9NVS2-2	Isoform 2 of 39S ribosomal protein S18a, mitochondrial OS=Homo sapiens OX=9606 GN=MRPS18A		MRPS18A			2.86399	0.0500635	0.432505
-pH fractionation/SP	Q9NZZ3	Charged multivesicular body protein 5 OS=Homo sapiens OX=9606 GN=CHMP5 PE=1 SV=1	ENSG00000086065	CHMP5			1.59647	0.0502811	0.109869

## Sheet: ONLY cytoplasmic
Search files/database	SWISS-PROT Accession	Description	Ensembl Gene ID	Gene Symbol	custom database Accession	log2_FC	p-value
+pH fractionation/SP	A5PLL7	Transmembrane protein 189 OS=Homo sapiens OX=9606 GN=TMEM189 PE=1 SV=3	ENSG00000240849	TMEM189; TMEM189-UBE2V1		0.437936	0.462307
+pH fractionation/SP	O14967	Calmegin OS=Homo sapiens OX=9606 GN=CLGN PE=1 SV=1	ENSG00000153132	CLGN		-1.26069	0.154438
+pH fractionation/SP	O15162	Phospholipid scramblase 1 OS=Homo sapiens OX=9606 GN=PLSCR1 PE=1 SV=1	ENSG00000188313	PLSCR1		1.25161	0.00181443
+pH fractionation/SP	O15400	Syntaxin-7 OS=Homo sapiens OX=9606 GN=STX7 PE=1 SV=4	ENSG00000079950	STX7		0.689358	0.18601
+pH fractionation/SP	O43318	Mitogen-activated protein kinase kinase kinase 7 OS=Homo sapiens OX=9606 GN=MAP3K7 PE=1 SV=1	ENSG00000135341	MAP3K7		0.773074	0.135966
+pH fractionation/SP	O43852-4	Isoform 4 of Calumenin OS=Homo sapiens OX=9606 GN=CALU	ENSG00000128595	CALU		-0.776777	ND
+pH fractionation/SP	O60566-3	Isoform 3 of Mitotic checkpoint serine/threonine-protein kinase BUB1 beta OS=Homo sapiens OX=9606 GN=BUB1B	ENSG00000156970	BUB1B		-3.00214	0.0128407
+pH fractionation/SP	O60613	Selenoprotein F OS=Homo sapiens OX=9606 GN=SELENOF PE=1 SV=4		SELENOF		-0.0740079	0.91571
+pH fractionation/SP	O95219	Sorting nexin-4 OS=Homo sapiens OX=9606 GN=SNX4 PE=1 SV=1	ENSG00000114520	SNX4		0.874145	0.164737
+pH fractionation/SP	O95273	Cyclin-D1-binding protein 1 OS=Homo sapiens OX=9606 GN=CCNDBP1 PE=1 SV=2	ENSG00000166946	CCNDBP1		-0.150908	ND
+pH fractionation/SP	O95544-2	Isoform 2 of NAD kinase OS=Homo sapiens OX=9606 GN=NADK	ENSG00000008130	NADK		-0.517943	0.306684
+pH fractionation/SP	O95562	Vesicle transport protein SFT2B OS=Homo sapiens OX=9606 GN=SFT2D2 PE=1 SV=1	ENSG00000213064	SFT2D2		-3.10482	0.0239558
+pH fractionation/SP	O95822	Malonyl-CoA decarboxylase, mitochondrial OS=Homo sapiens OX=9606 GN=MLYCD PE=1 SV=3	ENSG00000103150	MLYCD		1.01924	ND
+pH fractionation/SP	P00414	Cytochrome c oxidase subunit 3 OS=Homo sapiens OX=9606 GN=MT-CO3 PE=1 SV=2	ENSG00000198938	COX3		-2.28195	0.397314
+pH fractionation/SP	P03897	NADH-ubiquinone oxidoreductase chain 3 OS=Homo sapiens OX=9606 GN=MT-ND3 PE=1 SV=1	ENSG00000198840	ND3		0.152043	0.742602
+pH fractionation/SP	P04062	Glucosylceramidase OS=Homo sapiens OX=9606 GN=GBA PE=1 SV=3	ENSG00000177628	GBA		-0.334382	ND
+pH fractionation/SP	P04183	Thymidine kinase, cytosolic OS=Homo sapiens OX=9606 GN=TK1 PE=1 SV=2	ENSG00000167900	TK1		-0.0489272	0.909626
+pH fractionation/SP	P07919	Cytochrome b-c1 complex subunit 6, mitochondrial OS=Homo sapiens OX=9606 GN=UQCRH PE=1 SV=2	ENSG00000173660	UQCRH		-0.0532734	0.972245
+pH fractionation/SP	P08962	CD63 antigen OS=Homo sapiens OX=9606 GN=CD63 PE=1 SV=2	ENSG00000135404	CD63		0.575199	0.244739
+pH fractionation/SP	P13747	HLA class I histocompatibility antigen, alpha chain E OS=Homo sapiens OX=9606 GN=HLA-E PE=1 SV=3	ENSG00000230254	HLA-E		1.78088	0.0120748
+pH fractionation/SP	P13929	Beta-enolase OS=Homo sapiens OX=9606 GN=ENO3 PE=1 SV=5	ENSG00000108515	ENO3		2.05122	0.111204
+pH fractionation/SP	P16930-2	Isoform 2 of Fumarylacetoacetase OS=Homo sapiens OX=9606 GN=FAH	ENSG00000103876	FAH		0.798158	0.405031
+pH fractionation/SP	P20810-6	Isoform 6 of Calpastatin OS=Homo sapiens OX=9606 GN=CAST	ENSG00000153113	CAST		0.977991	0.155922
+pH fractionation/SP	P24666-2	Isoform 2 of Low molecular weight phosphotyrosine protein phosphatase OS=Homo sapiens OX=9606 GN=ACP1	ENSG00000143727	ACP1		-0.347639	0.484657
+pH fractionation/SP	P25445	Tumor necrosis factor receptor superfamily member 6 OS=Homo sapiens OX=9606 GN=FAS PE=1 SV=1	ENSG00000026103	FAS		-0.0225251	0.96789
+pH fractionation/SP	P27540	Aryl hydrocarbon receptor nuclear translocator OS=Homo sapiens OX=9606 GN=ARNT PE=1 SV=1	ENSG00000143437	ARNT		-0.566743	ND
+pH fractionation/SP	P29692-3	Isoform 3 of Elongation factor 1-delta OS=Homo sapiens OX=9606 GN=EEF1D	ENSG00000104529	EEF1D		-2.03154	0.19167
+pH fractionation/SP	P35626	Beta-adrenergic receptor kinase 2 OS=Homo sapiens OX=9606 GN=GRK3 PE=1 SV=2	ENSG00000100077	ADRBK2; GRK3			ND
+pH fractionation/SP	P42338	Phosphatidylinositol 4,5-bisphosphate 3-kinase catalytic subunit beta isoform OS=Homo sapiens OX=9606 GN=PIK3CB PE=1 SV=1	ENSG00000051382	PIK3CB		0.20965	ND
+pH fractionation/SP	P52564	Dual specificity mitogen-activated protein kinase kinase 6 OS=Homo sapiens OX=9606 GN=MAP2K6 PE=1 SV=1	ENSG00000108984	MAP2K6		-2.26651	0.173825
+pH fractionation/SP	P55209-3	Isoform 3 of Nucleosome assembly protein 1-like 1 OS=Homo sapiens OX=9606 GN=NAP1L1	ENSG00000187109	NAP1L1			ND
+pH fractionation/SP	P60604	Ubiquitin-conjugating enzyme E2 G2 OS=Homo sapiens OX=9606 GN=UBE2G2 PE=1 SV=1	ENSG00000184787	UBE2G2		0.215495	0.752799
+pH fractionation/SP	P60763	Ras-related C3 botulinum toxin substrate 3 OS=Homo sapiens OX=9606 GN=RAC3 PE=1 SV=1	ENSG00000169750	RAC3		1.33068	0.0237809
+pH fractionation/SP	P61457	Pterin-4-alpha-carbinolamine dehydratase OS=Homo sapiens OX=9606 GN=PCBD1 PE=1 SV=2	ENSG00000166228	PCBD1		0.201219	0.616181
+pH fractionation/SP	Q00266	S-adenosylmethionine synthase isoform type-1 OS=Homo sapiens OX=9606 GN=MAT1A PE=1 SV=2	ENSG00000151224	MAT1A		0.00146709	0.998924
+pH fractionation/SP	Q00613	Heat shock factor protein 1 OS=Homo sapiens OX=9606 GN=HSF1 PE=1 SV=1	ENSG00000185122	HSF1		-1.28215	0.249137
+pH fractionation/SP	Q01415	N-acetylgalactosamine kinase OS=Homo sapiens OX=9606 GN=GALK2 PE=1 SV=1	ENSG00000156958	GALK2		0.0825445	0.930084
+pH fractionation/SP	Q04656-3	Isoform 2 of Copper-transporting ATPase 1 OS=Homo sapiens OX=9606 GN=ATP7A		ATP7A		0.671364	ND
+pH fractionation/SP	Q0PNE2	Elongator complex protein 6 OS=Homo sapiens OX=9606 GN=ELP6 PE=1 SV=1	ENSG00000163832	ELP6		-0.305303	0.622727
+pH fractionation/SP	Q0VDG4	Secernin-3 OS=Homo sapiens OX=9606 GN=SCRN3 PE=1 SV=1	ENSG00000144306	SCRN3		0.874658	0.518255
+pH fractionation/SP	Q13158	FAS-associated death domain protein OS=Homo sapiens OX=9606 GN=FADD PE=1 SV=1	ENSG00000168040	FADD			ND
+pH fractionation/SP	Q13405	39S ribosomal protein L49, mitochondrial OS=Homo sapiens OX=9606 GN=MRPL49 PE=1 SV=1	ENSG00000149792	MRPL49		0.354629	0.905484
+pH fractionation/SP	Q13439-5	Isoform 5 of Golgin subfamily A member 4 OS=Homo sapiens OX=9606 GN=GOLGA4	ENSG00000144674	GOLGA4		1.99841	ND
+pH fractionation/SP	Q13572	Inositol-tetrakisphosphate 1-kinase OS=Homo sapiens OX=9606 GN=ITPK1 PE=1 SV=2	ENSG00000274958	ITPK1		-0.824943	0.165926
+pH fractionation/SP	Q15527	Surfeit locus protein 2 OS=Homo sapiens OX=9606 GN=SURF2 PE=1 SV=3		SURF2		-2.32991	0.120913
+pH fractionation/SP	Q15654	Thyroid receptor-interacting protein 6 OS=Homo sapiens OX=9606 GN=TRIP6 PE=1 SV=3	ENSG00000087077	TRIP6			ND
+pH fractionation/SP	Q16773	Kynurenine--oxoglutarate transaminase 1 OS=Homo sapiens OX=9606 GN=KYAT1 PE=1 SV=1	ENSG00000171097	CCBL1; KYAT1		-1.09092	0.0997315
+pH fractionation/SP	Q460N5	Poly [ADP-ribose] polymerase 14 OS=Homo sapiens OX=9606 GN=PARP14 PE=1 SV=3	ENSG00000173193	PARP14		0.712156	0.35692
+pH fractionation/SP	Q53GL7	Poly [ADP-ribose] polymerase 10 OS=Homo sapiens OX=9606 GN=PARP10 PE=1 SV=2	ENSG00000178685	PARP10		0.957831	0.362439
+pH fractionation/SP	Q5BJD5	Transmembrane protein 41B OS=Homo sapiens OX=9606 GN=TMEM41B PE=1 SV=1	ENSG00000166471	TMEM41B		1.18367	0.185162
+pH fractionation/SP	Q5SGD2	Protein phosphatase 1L OS=Homo sapiens OX=9606 GN=PPM1L PE=1 SV=1	ENSG00000163590	PPM1L		-1.61504	0.326051
+pH fractionation/SP	Q5SWX8	Protein odr-4 homolog OS=Homo sapiens OX=9606 GN=ODR4 PE=1 SV=1	ENSG00000157181	C1orf27; ODR4		-0.437062	0.665511
+pH fractionation/SP	Q5U5X0	Complex III assembly factor LYRM7 OS=Homo sapiens OX=9606 GN=LYRM7 PE=1 SV=1	ENSG00000186687	LYRM7		1.25193	0.379797
+pH fractionation/SP	Q6AI08	HEAT repeat-containing protein 6 OS=Homo sapiens OX=9606 GN=HEATR6 PE=1 SV=1	ENSG00000068097	HEATR6		1.65435	0.518876
+pH fractionation/SP	Q6GYQ0-2	Isoform 2 of Ral GTPase-activating protein subunit alpha-1 OS=Homo sapiens OX=9606 GN=RALGAPA1	ENSG00000174373	RALGAPA1		0.824736	0.36438
+pH fractionation/SP	Q6P4A7	Sideroflexin-4 OS=Homo sapiens OX=9606 GN=SFXN4 PE=1 SV=1	ENSG00000183605	SFXN4		-0.683395	0.00806737
+pH fractionation/SP	Q6P4F2	Ferredoxin-2, mitochondrial OS=Homo sapiens OX=9606 GN=FDX2 PE=1 SV=1		FDX1L		0.889522	0.347158
+pH fractionation/SP	Q6P9H5	GTPase IMAP family member 6 OS=Homo sapiens OX=9606 GN=GIMAP6 PE=2 SV=1	ENSG00000133561	GIMAP6		0.19797	0.547363
+pH fractionation/SP	Q6PI26	Protein SHQ1 homolog OS=Homo sapiens OX=9606 GN=SHQ1 PE=1 SV=2	ENSG00000144736	SHQ1		-2.50457	ND
+pH fractionation/SP	Q6UXD5	Seizure 6-like protein 2 OS=Homo sapiens OX=9606 GN=SEZ6L2 PE=1 SV=2	ENSG00000174938	SEZ6L2		0.442693	0.643402
+pH fractionation/SP	Q7L3B6	Hsp90 co-chaperone Cdc37-like 1 OS=Homo sapiens OX=9606 GN=CDC37L1 PE=1 SV=1	ENSG00000106993	CDC37L1		1.03362	0.448053
+pH fractionation/SP	Q7L5N7	Lysophosphatidylcholine acyltransferase 2 OS=Homo sapiens OX=9606 GN=LPCAT2 PE=1 SV=1	ENSG00000087253	LPCAT2		2.98932	0.000662666
+pH fractionation/SP	Q7L7X3	Serine/threonine-protein kinase TAO1 OS=Homo sapiens OX=9606 GN=TAOK1 PE=1 SV=1	ENSG00000160551	TAOK1			ND
+pH fractionation/SP	Q7Z7A3	Cytoplasmic tRNA 2-thiolation protein 1 OS=Homo sapiens OX=9606 GN=CTU1 PE=1 SV=1	ENSG00000142544	CTU1		-2.14542	0.018746
+pH fractionation/SP	Q86X53	Glutamate-rich protein 1 OS=Homo sapiens OX=9606 GN=ERICH1 PE=1 SV=1	ENSG00000104714	ERICH1			ND
+pH fractionation/SP	Q86YD1	Prostate tumor-overexpressed gene 1 protein OS=Homo sapiens OX=9606 GN=PTOV1 PE=1 SV=1	ENSG00000104960	PTOV1			ND
+pH fractionation/SP	Q8IYU8	Calcium uptake protein 2, mitochondrial OS=Homo sapiens OX=9606 GN=MICU2 PE=1 SV=2	ENSG00000165487	EFHA1; MICU2		-4.28169	ND
+pH fractionation/SP	Q8N8R5	UPF0565 protein C2orf69 OS=Homo sapiens OX=9606 GN=C2orf69 PE=1 SV=1	ENSG00000178074	C2orf69			ND
+pH fractionation/SP	Q8NB49	Phospholipid-transporting ATPase IG OS=Homo sapiens OX=9606 GN=ATP11C PE=1 SV=3	ENSG00000101974	ATP11C		-0.656087	ND
+pH fractionation/SP	Q8NBA8	DTW domain-containing protein 2 OS=Homo sapiens OX=9606 GN=DTWD2 PE=1 SV=1	ENSG00000169570	DTWD2		0.72136	0.365508
+pH fractionation/SP	Q8NC42	E3 ubiquitin-protein ligase RNF149 OS=Homo sapiens OX=9606 GN=RNF149 PE=2 SV=2	ENSG00000163162	RNF149			ND
+pH fractionation/SP	Q8NC51-2	Isoform 2 of Plasminogen activator inhibitor 1 RNA-binding protein OS=Homo sapiens OX=9606 GN=SERBP1	ENSG00000142864	SERBP1		1.58071	0.435238
+pH fractionation/SP	Q8NHH9	Atlastin-2 OS=Homo sapiens OX=9606 GN=ATL2 PE=1 SV=2	ENSG00000119787	ATL2		-1.21867	0.168815
+pH fractionation/SP	Q8NHV1	GTPase IMAP family member 7 OS=Homo sapiens OX=9606 GN=GIMAP7 PE=1 SV=1	ENSG00000179144	GIMAP7		-0.493077	ND
+pH fractionation/SP	Q8TBX8	Phosphatidylinositol 5-phosphate 4-kinase type-2 gamma OS=Homo sapiens OX=9606 GN=PIP4K2C PE=1 SV=3	ENSG00000166908	PIP4K2C		-0.542971	ND
+pH fractionation/SP	Q8TDQ7	Glucosamine-6-phosphate isomerase 2 OS=Homo sapiens OX=9606 GN=GNPDA2 PE=1 SV=1	ENSG00000163281	GNPDA2		2.15478	0.037352
+pH fractionation/SP	Q8WUY9	DEP domain-containing protein 1B OS=Homo sapiens OX=9606 GN=DEPDC1B PE=1 SV=2	ENSG00000035499	DEPDC1B		-1.7622	ND
+pH fractionation/SP	Q8WW01	tRNA-splicing endonuclease subunit Sen15 OS=Homo sapiens OX=9606 GN=TSEN15 PE=1 SV=1	ENSG00000198860	TSEN15		-2.50953	ND
+pH fractionation/SP	Q92636-2	Isoform 2 of Protein FAN OS=Homo sapiens OX=9606 GN=NSMAF	ENSG00000035681	NSMAF		-0.14274	0.803074
+pH fractionation/SP	Q92854	Semaphorin-4D OS=Homo sapiens OX=9606 GN=SEMA4D PE=1 SV=1	ENSG00000187764	SEMA4D		0.601899	0.16512
+pH fractionation/SP	Q96DR4	StAR-related lipid transfer protein 4 OS=Homo sapiens OX=9606 GN=STARD4 PE=2 SV=1	ENSG00000164211	STARD4			ND
+pH fractionation/SP	Q96EC8	Protein YIPF6 OS=Homo sapiens OX=9606 GN=YIPF6 PE=1 SV=2	ENSG00000181704	YIPF6		-0.0337511	0.944263
+pH fractionation/SP	Q96EP0	E3 ubiquitin-protein ligase RNF31 OS=Homo sapiens OX=9606 GN=RNF31 PE=1 SV=1	ENSG00000092098	RNF31		2.21214	ND
+pH fractionation/SP	Q96HE9	Proline-rich protein 11 OS=Homo sapiens OX=9606 GN=PRR11 PE=1 SV=1	ENSG00000068489	PRR11			ND
+pH fractionation/SP	Q96HP4	Oxidoreductase NAD-binding domain-containing protein 1 OS=Homo sapiens OX=9606 GN=OXNAD1 PE=1 SV=1	ENSG00000154814	OXNAD1		-1.38199	ND
+pH fractionation/SP	Q96HR8	H/ACA ribonucleoprotein complex non-core subunit NAF1 OS=Homo sapiens OX=9606 GN=NAF1 PE=1 SV=2	ENSG00000145414	NAF1			ND
+pH fractionation/SP	Q96Q15	Serine/threonine-protein kinase SMG1 OS=Homo sapiens OX=9606 GN=SMG1 PE=1 SV=3	ENSG00000157106	SMG1			ND
+pH fractionation/SP	Q96RP9	Elongation factor G, mitochondrial OS=Homo sapiens OX=9606 GN=GFM1 PE=1 SV=2	ENSG00000168827	GFM1		-0.851184	0.535397
+pH fractionation/SP	Q99538	Legumain OS=Homo sapiens OX=9606 GN=LGMN PE=1 SV=1	ENSG00000100600	LGMN		-0.336611	0.646984
+pH fractionation/SP	Q9BQ95	Evolutionarily conserved signaling intermediate in Toll pathway, mitochondrial OS=Homo sapiens OX=9606 GN=ECSIT PE=1 SV=1	ENSG00000130159	ECSIT			ND
+pH fractionation/SP	Q9BTT6	Leucine-rich repeat-containing protein 1 OS=Homo sapiens OX=9606 GN=LRRC1 PE=1 SV=1	ENSG00000137269	LRRC1			ND
+pH fractionation/SP	Q9BUE6-2	Isoform 2 of Iron-sulfur cluster assembly 1 homolog, mitochondrial OS=Homo sapiens OX=9606 GN=ISCA1		ISCA1		-1.00435	0.118349
+pH fractionation/SP	Q9BWE0-4	Isoform 2 of Replication initiator 1 OS=Homo sapiens OX=9606 GN=REPIN1	ENSG00000214022	REPIN1		-1.58336	0.0870182
+pH fractionation/SP	Q9BX67	Junctional adhesion molecule C OS=Homo sapiens OX=9606 GN=JAM3 PE=1 SV=1	ENSG00000166086	JAM3		-2.47867	0.0138327
+pH fractionation/SP	Q9BY43-2	Isoform 2 of Charged multivesicular body protein 4a OS=Homo sapiens OX=9606 GN=CHMP4A	ENSG00000254505	CHMP4A		-0.299673	0.522852
+pH fractionation/SP	Q9BYN8	28S ribosomal protein S26, mitochondrial OS=Homo sapiens OX=9606 GN=MRPS26 PE=1 SV=1	ENSG00000125901	MRPS26		-0.648178	0.513528
+pH fractionation/SP	Q9BZ23	Pantothenate kinase 2, mitochondrial OS=Homo sapiens OX=9606 GN=PANK2 PE=1 SV=3	ENSG00000125779	PANK2			ND
+pH fractionation/SP	Q9BZQ6	ER degradation-enhancing alpha-mannosidase-like protein 3 OS=Homo sapiens OX=9606 GN=EDEM3 PE=1 SV=2	ENSG00000116406	EDEM3			ND
+pH fractionation/SP	Q9C0D3	Protein zyg-11 homolog B OS=Homo sapiens OX=9606 GN=ZYG11B PE=1 SV=2	ENSG00000162378	ZYG11B		1.08642	ND
+pH fractionation/SP	Q9H330	Transmembrane protein 245 OS=Homo sapiens OX=9606 GN=TMEM245 PE=1 SV=3		TMEM245		0.717129	0.460507
+pH fractionation/SP	Q9H3C7	Gametogenetin-binding protein 2 OS=Homo sapiens OX=9606 GN=GGNBP2 PE=1 SV=1	ENSG00000275099	GGNBP2		-0.589025	ND
+pH fractionation/SP	Q9H3H1	tRNA dimethylallyltransferase OS=Homo sapiens OX=9606 GN=TRIT1 PE=1 SV=1	ENSG00000043514	TRIT1			ND
+pH fractionation/SP	Q9H3H3-3	Isoform 3 of UPF0696 protein C11orf68 OS=Homo sapiens OX=9606 GN=C11orf68	ENSG00000175573	C11orf68		0.477373	0.670397
+pH fractionation/SP	Q9H6L5	Reticulophagy regulator 1 OS=Homo sapiens OX=9606 GN=RETREG1 PE=1 SV=1	ENSG00000154153	FAM134B; RETREG1		-1.23882	ND
+pH fractionation/SP	Q9H900	Protein zwilch homolog OS=Homo sapiens OX=9606 GN=ZWILCH PE=1 SV=2	ENSG00000174442	ZWILCH		-2.32284	0.100204
+pH fractionation/SP	Q9HAS0	Protein Njmu-R1 OS=Homo sapiens OX=9606 GN=C17orf75 PE=1 SV=2	ENSG00000108666	C17orf75		-0.913754	0.551555
+pH fractionation/SP	Q9NVV5	Androgen-induced gene 1 protein OS=Homo sapiens OX=9606 GN=AIG1 PE=1 SV=2	ENSG00000146416	AIG1		-0.138044	ND
+pH fractionation/SP	Q9NXK8	F-box/LRR-repeat protein 12 OS=Homo sapiens OX=9606 GN=FBXL12 PE=1 SV=1	ENSG00000127452	FBXL12		-1.29938	ND
+pH fractionation/SP	Q9NXU5	ADP-ribosylation factor-like protein 15 OS=Homo sapiens OX=9606 GN=ARL15 PE=1 SV=1	ENSG00000185305	ARL15		0.89769	0.100573
+pH fractionation/SP	Q9NYV4	Cyclin-dependent kinase 12 OS=Homo sapiens OX=9606 GN=CDK12 PE=1 SV=2	ENSG00000167258	CDK12		-0.816836	0.425462
+pH fractionation/SP	Q9P032	NADH dehydrogenase [ubiquinone] 1 alpha subcomplex assembly factor 4 OS=Homo sapiens OX=9606 GN=NDUFAF4 PE=1 SV=1	ENSG00000123545	NDUFAF4		0.0903057	0.925784
+pH fractionation/SP	Q9P0P0	E3 ubiquitin-protein ligase RNF181 OS=Homo sapiens OX=9606 GN=RNF181 PE=1 SV=1	ENSG00000168894	RNF181		-0.619479	0.622582
+pH fractionation/SP	Q9P2D3	HEAT repeat-containing protein 5B OS=Homo sapiens OX=9606 GN=HEATR5B PE=1 SV=2	ENSG00000008869	HEATR5B		0.853492	0.532955
+pH fractionation/SP	Q9UH62	Armadillo repeat-containing X-linked protein 3 OS=Homo sapiens OX=9606 GN=ARMCX3 PE=1 SV=1	ENSG00000102401	ARMCX3		0.647678	0.418353
+pH fractionation/SP	Q9UMZ2	Synergin gamma OS=Homo sapiens OX=9606 GN=SYNRG PE=1 SV=2	ENSG00000275066	SYNRG		-0.108223	ND
+pH fractionation/SP	Q9UN36	Protein NDRG2 OS=Homo sapiens OX=9606 GN=NDRG2 PE=1 SV=2	ENSG00000165795	NDRG2		-0.616254	ND
+pH fractionation/SP	Q9UNZ2-4	Isoform 2 of NSFL1 cofactor p47 OS=Homo sapiens OX=9606 GN=NSFL1C	ENSG00000088833	NSFL1C		0.173333	0.800412
+pH fractionation/SP	Q9UPT6	C-Jun-amino-terminal kinase-interacting protein 3 OS=Homo sapiens OX=9606 GN=MAPK8IP3 PE=1 SV=3	ENSG00000138834	MAPK8IP3		-0.209324	ND
+pH fractionation/SP	Q9UPY8	Microtubule-associated protein RP/EB family member 3 OS=Homo sapiens OX=9606 GN=MAPRE3 PE=1 SV=1	ENSG00000084764	MAPRE3		1.53633	0.0660684
+pH fractionation/SP	Q9Y289	Sodium-dependent multivitamin transporter OS=Homo sapiens OX=9606 GN=SLC5A6 PE=2 SV=2	ENSG00000138074	SLC5A6			ND
+pH fractionation/SP	Q9Y2H0	Disks large-associated protein 4 OS=Homo sapiens OX=9606 GN=DLGAP4 PE=1 SV=3	ENSG00000080845	DLGAP4		0.748394	0.563119
+pH fractionation/SP	Q9Y5S1	Transient receptor potential cation channel subfamily V member 2 OS=Homo sapiens OX=9606 GN=TRPV2 PE=1 SV=1	ENSG00000187688	TRPV2		0.32096	0.793815
+pH fractionation/SP	Q9Y6A5	Transforming acidic coiled-coil-containing protein 3 OS=Homo sapiens OX=9606 GN=TACC3 PE=1 SV=1	ENSG00000013810	TACC3			ND
-pH fractionation/SP	A2RU67	Protein FAM234B OS=Homo sapiens OX=9606 GN=FAM234B PE=1 SV=1	ENSG00000084444	KIAA1467; FAM234B		1.17349	0.00517094
-pH fractionation/SP	C9JLW8	Mapk-regulated corepressor-interacting protein 1 OS=Homo sapiens OX=9606 GN=MCRIP1 PE=1 SV=1	ENSG00000225663	FAM195B; MCRIP1		1.08183	0.368041
-pH fractionation/SP	O00429-2	Isoform 4 of Dynamin-1-like protein OS=Homo sapiens OX=9606 GN=DNM1L	ENSG00000087470	DNM1L		-0.712199	ND
-pH fractionation/SP	O00559-2	Isoform 2 of Receptor-binding cancer antigen expressed on SiSo cells OS=Homo sapiens OX=9606 GN=EBAG9	ENSG00000147654	EBAG9		1.1926	ND
-pH fractionation/SP	O00584	Ribonuclease T2 OS=Homo sapiens OX=9606 GN=RNASET2 PE=1 SV=2	ENSG00000026297	RNASET2			ND
-pH fractionation/SP	O14910	Protein lin-7 homolog A OS=Homo sapiens OX=9606 GN=LIN7A PE=1 SV=2	ENSG00000111052	LIN7A		-0.802597	0.0732059
-pH fractionation/SP	O15066	Kinesin-like protein KIF3B OS=Homo sapiens OX=9606 GN=KIF3B PE=1 SV=1	ENSG00000101350	KIF3B		1.55116	ND
-pH fractionation/SP	O43493	Trans-Golgi network integral membrane protein 2 OS=Homo sapiens OX=9606 GN=TGOLN2 PE=1 SV=3		TGOLN2		0.796997	0.495119
-pH fractionation/SP	O43715	TP53-regulated inhibitor of apoptosis 1 OS=Homo sapiens OX=9606 GN=TRIAP1 PE=1 SV=1	ENSG00000170855	TRIAP1		-0.228325	0.367412
-pH fractionation/SP	O43752	Syntaxin-6 OS=Homo sapiens OX=9606 GN=STX6 PE=1 SV=1	ENSG00000135823	STX6		1.09653	ND
-pH fractionation/SP	O60496	Docking protein 2 OS=Homo sapiens OX=9606 GN=DOK2 PE=1 SV=2	ENSG00000147443	DOK2		0.490499	0.00771073
-pH fractionation/SP	O75208	Ubiquinone biosynthesis protein COQ9, mitochondrial OS=Homo sapiens OX=9606 GN=COQ9 PE=1 SV=1	ENSG00000088682	COQ9		-0.914272	0.116422
-pH fractionation/SP	O75264	Small integral membrane protein 24 OS=Homo sapiens OX=9606 GN=SMIM24 PE=2 SV=2	ENSG00000095932	C19orf77; SMIM24		2.66489	0.00139289
-pH fractionation/SP	O94782	Ubiquitin carboxyl-terminal hydrolase 1 OS=Homo sapiens OX=9606 GN=USP1 PE=1 SV=1	ENSG00000162607	USP1			ND
-pH fractionation/SP	O95429	BAG family molecular chaperone regulator 4 OS=Homo sapiens OX=9606 GN=BAG4 PE=1 SV=1	ENSG00000156735	BAG4		-0.0118002	0.949013
-pH fractionation/SP	O95817	BAG family molecular chaperone regulator 3 OS=Homo sapiens OX=9606 GN=BAG3 PE=1 SV=3	ENSG00000151929	BAG3			ND
-pH fractionation/SP	P01040	Cystatin-A OS=Homo sapiens OX=9606 GN=CSTA PE=1 SV=1	ENSG00000121552	CSTA			ND
-pH fractionation/SP	P07476	Involucrin OS=Homo sapiens OX=9606 GN=IVL PE=1 SV=2	ENSG00000163207	IVL		-0.858215	0.0827624
-pH fractionation/SP	P08648	Integrin alpha-5 OS=Homo sapiens OX=9606 GN=ITGA5 PE=1 SV=2	ENSG00000161638	ITGA5			ND
-pH fractionation/SP	P0DJ93	Small integral membrane protein 13 OS=Homo sapiens OX=9606 GN=SMIM13 PE=3 SV=1	ENSG00000224531	C6orf228; SMIM13			ND
-pH fractionation/SP	P0DOX7	Immunoglobulin kappa light chain OS=Homo sapiens OX=9606 PE=1 SV=1					ND
-pH fractionation/SP	P12035	Keratin, type II cytoskeletal 3 OS=Homo sapiens OX=9606 GN=KRT3 PE=1 SV=3	ENSG00000186442	KRT3			ND
-pH fractionation/SP	P30622	CAP-Gly domain-containing linker protein 1 OS=Homo sapiens OX=9606 GN=CLIP1 PE=1 SV=2	ENSG00000130779	CLIP1			ND
-pH fractionation/SP	P31025	Lipocalin-1 OS=Homo sapiens OX=9606 GN=LCN1 PE=1 SV=1	ENSG00000160349	LCN1			ND
-pH fractionation/SP	P40855	Peroxisomal biogenesis factor 19 OS=Homo sapiens OX=9606 GN=PEX19 PE=1 SV=1	ENSG00000162735	PEX19		0.460666	0.277554
-pH fractionation/SP	P42785-2	Isoform 2 of Lysosomal Pro-X carboxypeptidase OS=Homo sapiens OX=9606 GN=PRCP	ENSG00000137509	PRCP		0.90923	ND
-pH fractionation/SP	P48553	Trafficking protein particle complex subunit 10 OS=Homo sapiens OX=9606 GN=TRAPPC10 PE=1 SV=2	ENSG00000160218	TRAPPC10		1.44638	0.193321
-pH fractionation/SP	P51161-2	Isoform 2 of Gastrotropin OS=Homo sapiens OX=9606 GN=FABP6	ENSG00000170231	FABP6		0.399911	0.19518
-pH fractionation/SP	P51809-2	Isoform 2 of Vesicle-associated membrane protein 7 OS=Homo sapiens OX=9606 GN=VAMP7	ENSG00000124333	VAMP7		-0.204929	ND
-pH fractionation/SP	P55036-2	Isoform Rpn10E of 26S proteasome non-ATPase regulatory subunit 4 OS=Homo sapiens OX=9606 GN=PSMD4		PSMD4		0.273438	0.171594
-pH fractionation/SP	P56377	AP-1 complex subunit sigma-2 OS=Homo sapiens OX=9606 GN=AP1S2 PE=1 SV=1	ENSG00000182287	AP1S2			ND
-pH fractionation/SP	P78382	CMP-sialic acid transporter OS=Homo sapiens OX=9606 GN=SLC35A1 PE=2 SV=1	ENSG00000164414	SLC35A1		0.650373	0.0619989
-pH fractionation/SP	P78537	Biogenesis of lysosome-related organelles complex 1 subunit 1 OS=Homo sapiens OX=9606 GN=BLOC1S1 PE=1 SV=2	ENSG00000135441	BLOC1S1		1.01843	ND
-pH fractionation/SP	Q05397-5	Isoform 5 of Focal adhesion kinase 1 OS=Homo sapiens OX=9606 GN=PTK2	ENSG00000169398	PTK2		4.67991	ND
-pH fractionation/SP	Q08117-2	Isoform 2 of Amino-terminal enhancer of split OS=Homo sapiens OX=9606 GN=AES	ENSG00000104964	AES		0.236469	0.385147
-pH fractionation/SP	Q08AG7	Mitotic-spindle organizing protein 1 OS=Homo sapiens OX=9606 GN=MZT1 PE=1 SV=2	ENSG00000204899	MZT1		-0.0101697	ND
-pH fractionation/SP	Q12797	Aspartyl/asparaginyl beta-hydroxylase OS=Homo sapiens OX=9606 GN=ASPH PE=1 SV=3	ENSG00000198363	ASPH		-0.274786	0.5325
-pH fractionation/SP	Q13153-2	Isoform 2 of Serine/threonine-protein kinase PAK 1 OS=Homo sapiens OX=9606 GN=PAK1	ENSG00000149269	PAK1		-0.169654	0.533
-pH fractionation/SP	Q13277	Syntaxin-3 OS=Homo sapiens OX=9606 GN=STX3 PE=1 SV=3	ENSG00000166900	STX3		1.06289	0.00155646
-pH fractionation/SP	Q13503	Mediator of RNA polymerase II transcription subunit 21 OS=Homo sapiens OX=9606 GN=MED21 PE=1 SV=1	ENSG00000152944	MED21		-0.430249	0.15154
-pH fractionation/SP	Q13542	Eukaryotic translation initiation factor 4E-binding protein 2 OS=Homo sapiens OX=9606 GN=EIF4EBP2 PE=1 SV=1	ENSG00000148730	EIF4EBP2		1.12472	0.109625
-pH fractionation/SP	Q14511	Enhancer of filamentation 1 OS=Homo sapiens OX=9606 GN=NEDD9 PE=1 SV=1	ENSG00000111859	NEDD9			ND
-pH fractionation/SP	Q15004	PCNA-associated factor OS=Homo sapiens OX=9606 GN=PCLAF PE=1 SV=1	ENSG00000259316	KIAA0101; PCLAF			ND
-pH fractionation/SP	Q15025	TNFAIP3-interacting protein 1 OS=Homo sapiens OX=9606 GN=TNIP1 PE=1 SV=2	ENSG00000145901	TNIP1		0.369814	0.039028
-pH fractionation/SP	Q15643	Thyroid receptor-interacting protein 11 OS=Homo sapiens OX=9606 GN=TRIP11 PE=1 SV=3	ENSG00000100815	TRIP11		0.968951	0.066037
-pH fractionation/SP	Q15742	NGFI-A-binding protein 2 OS=Homo sapiens OX=9606 GN=NAB2 PE=1 SV=1	ENSG00000166886	NAB2			ND
-pH fractionation/SP	Q15814	Tubulin-specific chaperone C OS=Homo sapiens OX=9606 GN=TBCC PE=1 SV=2	ENSG00000124659	TBCC		0.392291	0.456915
-pH fractionation/SP	Q29963	HLA class I histocompatibility antigen, Cw-6 alpha chain OS=Homo sapiens OX=9606 GN=HLA-C PE=1 SV=2	ENSG00000228299	HLA-C		1.64252	0.00942586
-pH fractionation/SP	Q562E7	WD repeat-containing protein 81 OS=Homo sapiens OX=9606 GN=WDR81 PE=1 SV=2	ENSG00000167716	WDR81		0.0254379	ND
-pH fractionation/SP	Q58FG0	Putative heat shock protein HSP 90-alpha A5 OS=Homo sapiens OX=9606 GN=HSP90AA5P PE=2 SV=1		HSP90AA5P		-1.65819	ND
-pH fractionation/SP	Q5JSZ5	Protein PRRC2B OS=Homo sapiens OX=9606 GN=PRRC2B PE=1 SV=2	ENSG00000130723	PRRC2B		0.721148	ND
-pH fractionation/SP	Q5T447	E3 ubiquitin-protein ligase HECTD3 OS=Homo sapiens OX=9606 GN=HECTD3 PE=1 SV=1	ENSG00000126107	HECTD3		-0.250591	0.162241
-pH fractionation/SP	Q6GTX8	Leukocyte-associated immunoglobulin-like receptor 1 OS=Homo sapiens OX=9606 GN=LAIR1 PE=1 SV=1	ENSG00000274110	LAIR1			ND
-pH fractionation/SP	Q6NSJ2	Pleckstrin homology-like domain family B member 3 OS=Homo sapiens OX=9606 GN=PHLDB3 PE=2 SV=3	ENSG00000176531	PHLDB3			ND
-pH fractionation/SP	Q6P4E1-4	Isoform 4 of Protein CASC4 OS=Homo sapiens OX=9606 GN=CASC4	ENSG00000166734	CASC4		-0.288222	0.501858
-pH fractionation/SP	Q6QNY0	Biogenesis of lysosome-related organelles complex 1 subunit 3 OS=Homo sapiens OX=9606 GN=BLOC1S3 PE=1 SV=1	ENSG00000189114	BLOC1S3		0.352502	0.626511
-pH fractionation/SP	Q6QNY1	Biogenesis of lysosome-related organelles complex 1 subunit 2 OS=Homo sapiens OX=9606 GN=BLOC1S2 PE=1 SV=1	ENSG00000196072	BLOC1S2		0.262139	0.113294
-pH fractionation/SP	Q6R327-3	Isoform 3 of Rapamycin-insensitive companion of mTOR OS=Homo sapiens OX=9606 GN=RICTOR	ENSG00000164327	RICTOR		1.62596	0.0529783
-pH fractionation/SP	Q6ZRP7	Sulfhydryl oxidase 2 OS=Homo sapiens OX=9606 GN=QSOX2 PE=1 SV=3	ENSG00000165661	QSOX2		0.791316	0.149567
-pH fractionation/SP	Q6ZSR9	Uncharacterized protein FLJ45252 OS=Homo sapiens OX=9606 PE=2 SV=2					ND
-pH fractionation/SP	Q6ZVX7	F-box only protein 50 OS=Homo sapiens OX=9606 GN=NCCRP1 PE=1 SV=1	ENSG00000188505	NCCRP1			ND
-pH fractionation/SP	Q7LG56-6	Isoform 6 of Ribonucleoside-diphosphate reductase subunit M2 B OS=Homo sapiens OX=9606 GN=RRM2B		RRM2B		0.0755934	0.814585
-pH fractionation/SP	Q7Z3E2	Coiled-coil domain-containing protein 186 OS=Homo sapiens OX=9606 GN=CCDC186 PE=1 SV=2	ENSG00000165813	C10orf118; CCDC186			ND
-pH fractionation/SP	Q7Z4S6-4	Isoform 4 of Kinesin-like protein KIF21A OS=Homo sapiens OX=9606 GN=KIF21A		KIF21A		1.39313	0.0753514
-pH fractionation/SP	Q8IUF1	COBW domain-containing protein 2 OS=Homo sapiens OX=9606 GN=CBWD2 PE=2 SV=1	ENSG00000136682	CBWD2		-0.190418	0.164027
-pH fractionation/SP	Q8IWF6	Protein DENND6A OS=Homo sapiens OX=9606 GN=DENND6A PE=1 SV=1	ENSG00000174839	DENND6A		-0.45592	ND
-pH fractionation/SP	Q8IWJ2	GRIP and coiled-coil domain-containing protein 2 OS=Homo sapiens OX=9606 GN=GCC2 PE=1 SV=4	ENSG00000135968	GCC2		0.472897	0.552856
-pH fractionation/SP	Q8IX90	Spindle and kinetochore-associated protein 3 OS=Homo sapiens OX=9606 GN=SKA3 PE=1 SV=2	ENSG00000165480	SKA3		-1.49452	0.00385717
-pH fractionation/SP	Q8IXQ3	Uncharacterized protein C9orf40 OS=Homo sapiens OX=9606 GN=C9orf40 PE=1 SV=1	ENSG00000135045	C9orf40		-1.4476	0.165455
-pH fractionation/SP	Q8N4E4	Phosducin-like protein 2 OS=Homo sapiens OX=9606 GN=PDCL2 PE=1 SV=2	ENSG00000163440	PDCL2		-0.207408	0.471255
-pH fractionation/SP	Q8N4P3	Guanosine-3',5'-bis(diphosphate) 3'-pyrophosphohydrolase MESH1 OS=Homo sapiens OX=9606 GN=HDDC3 PE=1 SV=3	ENSG00000184508	HDDC3		0.14722	0.369022
-pH fractionation/SP	Q8NI22-2	Isoform 2 of Multiple coagulation factor deficiency protein 2 OS=Homo sapiens OX=9606 GN=MCFD2	ENSG00000180398	MCFD2		0.897397	0.00732907
-pH fractionation/SP	Q8TAP6	Centrosomal protein of 76 kDa OS=Homo sapiens OX=9606 GN=CEP76 PE=1 SV=1	ENSG00000101624	CEP76			ND
-pH fractionation/SP	Q8TBA6	Golgin subfamily A member 5 OS=Homo sapiens OX=9606 GN=GOLGA5 PE=1 SV=3	ENSG00000066455	GOLGA5			ND
-pH fractionation/SP	Q92851-4	Isoform D of Caspase-10 OS=Homo sapiens OX=9606 GN=CASP10	ENSG00000003400	CASP10			ND
-pH fractionation/SP	Q969E4	Transcription elongation factor A protein-like 3 OS=Homo sapiens OX=9606 GN=TCEAL3 PE=1 SV=1	ENSG00000196507	TCEAL3		0.866911	ND
-pH fractionation/SP	Q96A49	Synapse-associated protein 1 OS=Homo sapiens OX=9606 GN=SYAP1 PE=1 SV=1	ENSG00000169895	SYAP1		-0.431366	0.301134
-pH fractionation/SP	Q96BW9	Phosphatidate cytidylyltransferase, mitochondrial OS=Homo sapiens OX=9606 GN=TAMM41 PE=1 SV=2	ENSG00000144559	TAMM41		-0.124009	ND
-pH fractionation/SP	Q96CP2	FLYWCH family member 2 OS=Homo sapiens OX=9606 GN=FLYWCH2 PE=1 SV=1	ENSG00000162076	FLYWCH2		-1.37903	0.0772099
-pH fractionation/SP	Q96EK9	Protein KTI12 homolog OS=Homo sapiens OX=9606 GN=KTI12 PE=1 SV=1	ENSG00000198841	KTI12		-0.26757	0.471557
-pH fractionation/SP	Q96EQ0	Small glutamine-rich tetratricopeptide repeat-containing protein beta OS=Homo sapiens OX=9606 GN=SGTB PE=1 SV=1	ENSG00000197860	SGTB		0.0950567	0.346448
-pH fractionation/SP	Q96ER9	Coiled-coil domain-containing protein 51 OS=Homo sapiens OX=9606 GN=CCDC51 PE=1 SV=2	ENSG00000164051	CCDC51		-0.703333	ND
-pH fractionation/SP	Q96GC9	Vacuole membrane protein 1 OS=Homo sapiens OX=9606 GN=VMP1 PE=1 SV=1	ENSG00000062716	VMP1			ND
-pH fractionation/SP	Q96GS4	BLOC-1-related complex subunit 6 OS=Homo sapiens OX=9606 GN=BORCS6 PE=1 SV=2	ENSG00000196544	C17orf59; BORCS6		0.61381	0.110788
-pH fractionation/SP	Q96K21	Abscission/NoCut checkpoint regulator OS=Homo sapiens OX=9606 GN=ZFYVE19 PE=1 SV=3	ENSG00000166140	ZFYVE19		-0.506623	0.040037
-pH fractionation/SP	Q96LR5	Ubiquitin-conjugating enzyme E2 E2 OS=Homo sapiens OX=9606 GN=UBE2E2 PE=1 SV=1	ENSG00000182247	UBE2E2		-1.12805	0.093629
-pH fractionation/SP	Q96MH2	Protein HEXIM2 OS=Homo sapiens OX=9606 GN=HEXIM2 PE=1 SV=1	ENSG00000168517	HEXIM2		0.876974	ND
-pH fractionation/SP	Q96PC5	Melanoma inhibitory activity protein 2 OS=Homo sapiens OX=9606 GN=MIA2 PE=1 SV=4	ENSG00000258941	CTAGE5; MIA2		0.884891	0.0324747
-pH fractionation/SP	Q96TA1	Niban-like protein 1 OS=Homo sapiens OX=9606 GN=FAM129B PE=1 SV=3	ENSG00000136830	FAM129B		0.28988	0.784292
-pH fractionation/SP	Q99871-2	Isoform 2 of HAUS augmin-like complex subunit 7 OS=Homo sapiens OX=9606 GN=HAUS7		HAUS7		-1.30477	0.00416457
-pH fractionation/SP	Q9BQ49	Small integral membrane protein 7 OS=Homo sapiens OX=9606 GN=SMIM7 PE=1 SV=2	ENSG00000214046	SMIM7		0.264762	0.0874114
-pH fractionation/SP	Q9BV19	Uncharacterized protein C1orf50 OS=Homo sapiens OX=9606 GN=C1orf50 PE=1 SV=2	ENSG00000164008	C1orf50		0.232126	ND
-pH fractionation/SP	Q9BVG9	Phosphatidylserine synthase 2 OS=Homo sapiens OX=9606 GN=PTDSS2 PE=1 SV=1	ENSG00000174915	PTDSS2		-0.259118	0.053569
-pH fractionation/SP	Q9BZL4	Protein phosphatase 1 regulatory subunit 12C OS=Homo sapiens OX=9606 GN=PPP1R12C PE=1 SV=1	ENSG00000125503	PPP1R12C			ND
-pH fractionation/SP	Q9H0F7	ADP-ribosylation factor-like protein 6 OS=Homo sapiens OX=9606 GN=ARL6 PE=1 SV=1	ENSG00000113966	ARL6		0.589703	0.0580181
-pH fractionation/SP	Q9H1C7	Cysteine-rich and transmembrane domain-containing protein 1 OS=Homo sapiens OX=9606 GN=CYSTM1 PE=1 SV=1	ENSG00000120306	CYSTM1		-0.429749	0.182985
-pH fractionation/SP	Q9H813-2	Isoform 2 of Transmembrane protein 206 OS=Homo sapiens OX=9606 GN=TMEM206	ENSG00000065600	TMEM206		0.027338	0.967051
-pH fractionation/SP	Q9NV66	S-adenosyl-L-methionine-dependent tRNA 4-demethylwyosine synthase OS=Homo sapiens OX=9606 GN=TYW1 PE=2 SV=2	ENSG00000198874	TYW1		0.603461	0.258155
-pH fractionation/SP	Q9NV70	Exocyst complex component 1 OS=Homo sapiens OX=9606 GN=EXOC1 PE=1 SV=4	ENSG00000090989	EXOC1		0.0452331	0.888374
-pH fractionation/SP	Q9NWZ3	Interleukin-1 receptor-associated kinase 4 OS=Homo sapiens OX=9606 GN=IRAK4 PE=1 SV=1	ENSG00000198001	IRAK4		0.869504	0.185367
-pH fractionation/SP	Q9NYJ1-2	Isoform 2 of Cytochrome c oxidase assembly factor 4 homolog, mitochondrial OS=Homo sapiens OX=9606 GN=COA4	ENSG00000181924	COA4		-0.188873	0.842773
-pH fractionation/SP	Q9P2X0-2	Isoform 2 of Dolichol-phosphate mannosyltransferase subunit 3 OS=Homo sapiens OX=9606 GN=DPM3	ENSG00000179085	DPM3		0.262164	0.0592976
-pH fractionation/SP	Q9UDT6	CAP-Gly domain-containing linker protein 2 OS=Homo sapiens OX=9606 GN=CLIP2 PE=1 SV=1	ENSG00000106665	CLIP2			ND
-pH fractionation/SP	Q9UJU6-2	Isoform 2 of Drebrin-like protein OS=Homo sapiens OX=9606 GN=DBNL	ENSG00000136279	DBNL		0.134968	0.825253
-pH fractionation/SP	Q9UKI8-2	Isoform 2 of Serine/threonine-protein kinase tousled-like 1 OS=Homo sapiens OX=9606 GN=TLK1	ENSG00000198586	TLK1		-0.293531	0.475706
-pH fractionation/SP	Q9UL45	Biogenesis of lysosome-related organelles complex 1 subunit 6 OS=Homo sapiens OX=9606 GN=BLOC1S6 PE=1 SV=1	ENSG00000104164	BLOC1S6			ND
-pH fractionation/SP	Q9ULS5	Transmembrane and coiled-coil domain protein 3 OS=Homo sapiens OX=9606 GN=TMCC3 PE=2 SV=3	ENSG00000057704	TMCC3		0.580691	0.0862316
-pH fractionation/SP	Q9UNK0	Syntaxin-8 OS=Homo sapiens OX=9606 GN=STX8 PE=1 SV=2	ENSG00000170310	STX8		-0.0495403	0.750757
-pH fractionation/SP	Q9UPU7	TBC1 domain family member 2B OS=Homo sapiens OX=9606 GN=TBC1D2B PE=1 SV=2	ENSG00000167202	TBC1D2B		0.853234	ND
-pH fractionation/SP	Q9Y572	Receptor-interacting serine/threonine-protein kinase 3 OS=Homo sapiens OX=9606 GN=RIPK3 PE=1 SV=2	ENSG00000129465	RIPK3		-0.122403	ND
-pH fractionation/SP	Q9Y6I3-1	Isoform 2 of Epsin-1 OS=Homo sapiens OX=9606 GN=EPN1	ENSG00000063245	EPN1		-0.867708	0.299455
+pH fractionation/MAJIQ	Q9Y2T7		ENSG00000006114	ENSG00000006114	ENSG00000006114:t:35900689-35902667_35902667-35913217_L2	-0.186304	0.557137
+pH fractionation/MAJIQ	Q7L273	potassium channel tetramerization domain containing 9 [Source:HGNC Symbol;Acc:HGNC:22401]	ENSG00000104756	KCTD9	ENSG00000104756:t:25303596-25303766_25303766-25315715_S2		ND
+pH fractionation/MAJIQ	Q9BYM8	RANBP2-type and C3HC4-type zinc finger containing 1 [Source:HGNC Symbol;Acc:HGNC:15864]	ENSG00000125826	RBCK1	ENSG00000125826:s:390474-390669_390669-391056_L2	0.525325	0.17863
+pH fractionation/MAJIQ	O43542	X-ray repair cross complementing 3 [Source:HGNC Symbol;Acc:HGNC:12830]	ENSG00000126215	XRCC3	ENSG00000126215:t:104170733-104172397_104172379-104173340_S2		ND
+pH fractionation/MAJIQ	Q8WXB1	methyltransferase like 21A [Source:HGNC Symbol;Acc:HGNC:30476]	ENSG00000144401	METTL21A	ENSG00000144401:s:208486530-208486641_208478167-208486530_L0	-1.69929	ND
+pH fractionation/MAJIQ	P15056	B-Raf proto-oncogene, serine/threonine kinase [Source:HGNC Symbol;Acc:HGNC:1097]	ENSG00000157764	BRAF	ENSG00000157764:s:140439612-140439746_140434570-140439612_L0	0.498197	0.22031
+pH fractionation/MAJIQ	Q15019	septin 2 [Source:HGNC Symbol;Acc:HGNC:7729]	ENSG00000168385	SEPT2	ENSG00000168385:t:242265382-242265528_242263656-242265408_S1	0.192455	0.900397
+pH fractionation/MAJIQ	Q6PFW1	diphosphoinositol pentakisphosphate kinase 1 [Source:HGNC Symbol;Acc:HGNC:29023]	ENSG00000168781	PPIP5K1	ENSG00000168781:s:43873886-43874152_43873586-43874051_S0	0.801882	0.13985
+pH fractionation/MAJIQ	Q96DB5	regulator of microtubule dynamics 1 [Source:HGNC Symbol;Acc:HGNC:24285]	ENSG00000176623	RMDN1	ENSG00000176623:t:87492506-87492563_87492561-87498713_S2	0.704705	0.096539
+pH fractionation/MAJIQ	Q9BRA0	N(alpha)-acetyltransferase 38, NatC auxiliary subunit [Source:HGNC Symbol;Acc:HGNC:28212]	ENSG00000183011	NAA38	ENSG00000183011:t:7760003-7760161_7760161-7760303_L2	0.907761	0.387349
+pH fractionation/MAJIQ	Q8N357	solute carrier family 35 member F6 [Source:HGNC Symbol;Acc:HGNC:26055]	ENSG00000213699	SLC35F6	ENSG00000213699:s:26997119-26997191_26997191-26997912_L1	1.67774	0.0597492
+pH fractionation/MAJIQ		TVP23C-CDRT4 readthrough [Source:HGNC Symbol;Acc:HGNC:42961]	ENSG00000259024	TVP23C-CDRT4	ENSG00000259024:t:15450373-15450462_15450462-15456999_L1	1.01789	0.511356
-pH fractionation/MAJIQ		ENSG00000174093:t:36358299-36358395 OS=Homo sapiens GN=ENSG00000174093	ENSG00000174093		ENSG00000174093:t:36358299-36358395_36358395-36358842_S0	-0.0708455	0.320641
-pH fractionation/MAJIQ		ENSG00000185596:t:102514853-102515854 OS=Homo sapiens GN=ENSG00000185596	ENSG00000185596	WASH3P	ENSG00000185596:t:102514853-102515854_102514556-102515216_S0	-0.0171293	0.944922
-pH fractionation/MAJIQ		ENSG00000186300:t:2852378-2860482 OS=Homo sapiens GN=ENSG00000186300	ENSG00000186300	ZNF555	ENSG00000186300:t:2852378-2860482_2851649-2852378_L2		ND
+pH fractionation/RefSeq	Q96P50	ArfGAP with coiled-coil, ankyrin repeat and PH domains 3 (ACAP3), mRNA	ENSG00000131584	ACAP3	NM_030649.2_2	0.403284	0.6211
+pH fractionation/RefSeq	Q9Y4X0	Alport syndrome, mental retardation, midface hypoplasia and elliptocytosis chromosomal region gene 1 (AMMECR1), transcript variant 1, mRNA	ENSG00000101935	AMMECR1	NM_015365.2_3	-0.388957	0.584557
+pH fractionation/RefSeq	O14526	FCH domain only 1 (FCHO1), transcript variant 3, mRNA	ENSG00000130475	FCHO1	NM_001161358.1_3	1.06925	0.15431
+pH fractionation/RefSeq	P34059	galactosamine (N-acetyl)-6-sulfatase (GALNS), transcript variant 1, mRNA	ENSG00000141012	GALNS	NM_000512.4_2	0.447222	0.360439
+pH fractionation/RefSeq	Q53EU6	glycerol-3-phosphate acyltransferase 3 (GPAT3), transcript variant 3, mRNA	ENSG00000138678	GPAT3	NM_001256422.1_1	0.0413604	0.952806
+pH fractionation/RefSeq	Q643R3	lysophosphatidylcholine acyltransferase 4 (LPCAT4), mRNA	ENSG00000176454	LPCAT4	NM_153613.2_1	1.34879	ND
+pH fractionation/RefSeq	Q15759	mitogen-activated protein kinase 11 (MAPK11), transcript variant 1, mRNA	ENSG00000185386	MAPK11	NM_002751.6_2	0.633228	0.526842
+pH fractionation/RefSeq	Q96EY5	multivesicular body subunit 12A (MVB12A), transcript variant 1, mRNA	ENSG00000141971	MVB12A	NM_138401.3_1	0.475618	0.284425
+pH fractionation/RefSeq	Q9NV35	nudix hydrolase 15 (NUDT15), transcript variant 1, mRNA	ENSG00000136159	NUDT15	NM_018283.3_3	-1.56504	ND
+pH fractionation/RefSeq	Q8N138	ORMDL sphingolipid biosynthesis regulator 3 (ORMDL3), transcript variant 4, mRNA	ENSG00000172057	ORMDL3	NM_001320803.1_1	-0.1073	0.875209
+pH fractionation/RefSeq	Q7L3T8	prolyl-tRNA synthetase 2, mitochondrial (putative) (PARS2), mRNA	ENSG00000162396	PARS2	NM_152268.3_2	-0.672775	ND
+pH fractionation/RefSeq	O00562	phosphatidylinositol transfer protein membrane associated 1 (PITPNM1), transcript variant 1, mRNA	ENSG00000110697	PITPNM1	NM_004910.2_1	1.49266	ND
+pH fractionation/RefSeq	Q4KWH8	phospholipase C eta 1 (PLCH1), transcript variant 2, mRNA	ENSG00000114805	PLCH1	NM_014996.2_2	-0.0885615	0.763797
+pH fractionation/RefSeq	Q9UIW2	plexin A1 (PLXNA1), mRNA	ENSG00000114554	PLXNA1	NM_032242.3_3	0.0370534	0.931722
+pH fractionation/RefSeq	Q6VN20	RAN binding protein 10 (RANBP10), transcript variant 1, mRNA	ENSG00000141084	RANBP10	NM_020850.2_2	-0.811084	0.697223
+pH fractionation/RefSeq	Q969E2	secretory carrier membrane protein 4 (SCAMP4), transcript variant 1, mRNA	ENSG00000227500	SCAMP4	NM_079834.3_3	0.117338	0.816032
+pH fractionation/RefSeq	Q96I15	selenocysteine lyase (SCLY), mRNA	ENSG00000132330	SCLY	NM_016510.5_2	-0.337455	ND
+pH fractionation/RefSeq	Q96NB2	sideroflexin 2 (SFXN2), mRNA	ENSG00000156398	SFXN2	NM_178858.4_1	-1.10019	ND
+pH fractionation/RefSeq	P41440	solute carrier family 19 member 1 (SLC19A1), transcript variant 1, mRNA	ENSG00000173638	SLC19A1	NM_194255.2_3		ND
+pH fractionation/RefSeq	O94964	suppressor of glucose, autophagy associated 1 (SOGA1), transcript variant 1, mRNA	ENSG00000149639	SOGA1	NM_080627.3_1	-0.43726	0.442355
+pH fractionation/RefSeq	O43278	serine peptidase inhibitor, Kunitz type 1 (SPINT1), transcript variant 1, mRNA	ENSG00000166145	SPINT1	NM_181642.2_3	-0.583688	ND
+pH fractionation/RefSeq	Q99595	translocase of inner mitochondrial membrane 17A (TIMM17A), mRNA	ENSG00000134375	TIMM17A	NM_006335.2_3	-2.85904	ND
+pH fractionation/RefSeq	O00463	TNF receptor associated factor 5 (TRAF5), transcript variant 4, mRNA	ENSG00000082512	TRAF5	NM_001319207.1_1	1.70558	0.199955
+pH fractionation/RefSeq	P0DI81	trafficking protein particle complex 2 (TRAPPC2), transcript variant 3, mRNA	ENSG00000196459	TRAPPC2	NM_001128835.2_2	-0.53586	ND
+pH fractionation/RefSeq	Q96S82	ubiquitin like 7 (UBL7), transcript variant 4, mRNA	ENSG00000138629	UBL7	NM_001286740.1_3	-1.01456	0.264888
+pH fractionation/RefSeq	Q5W0Z9	zinc finger DHHC-type containing 20 (ZDHHC20), transcript variant 5, mRNA	ENSG00000180776	ZDHHC20	NM_001330059.1_1	0.321218	0.617172
-pH fractionation/RefSeq		Homo sapiens chloride channel CLIC like 1 (CLCC1), transcript variant 3, mRNA		CLCC1	NM_001278202.1_2	-0.30263	ND
-pH fractionation/RefSeq		Homo sapiens small nucleolar RNA, C/D box 22 (SNORD22), small nucleolar RNA		SNORD22	NR_000008.2_1		ND
-pH fractionation/RefSeq		Homo sapiens family with sequence similarity 234 member B (FAM234B), mRNA		FAM234B	NM_020853.1_2	1.0576	0.00482443
-pH fractionation/RefSeq		Homo sapiens lin-7 homolog B, crumbs cell polarity complex component (LIN7B), transcript variant 1, mRNA		LIN7B	NM_022165.2_2	-0.812835	0.0699893
-pH fractionation/RefSeq		Homo sapiens pellino E3 ubiquitin protein ligase family member 2 (PELI2), mRNA		PELI2	NM_021255.2_1	0.900131	0.0643615
-pH fractionation/RefSeq		Homo sapiens CREB binding protein (CREBBP), transcript variant 1, mRNA		CREBBP	NM_004380.2_3	-0.242772	0.216942

## Sheet: ONLY nuclear
Search files/database	SWISS-PROT Accession	Description	Ensembl Gene ID	Gene Symbol	custom database Accession	log2_FC	p-value
+pH fractionation/SP	A2AJT9	BCLAF1 and THRAP3 family member 3 OS=Homo sapiens OX=9606 GN=BCLAF3 PE=1 SV=1	ENSG00000173681	CXorf23; BCLAF3		2.03858	ND
+pH fractionation/SP	O15085-2	Isoform 2 of Rho guanine nucleotide exchange factor 11 OS=Homo sapiens OX=9606 GN=ARHGEF11	ENSG00000132694	ARHGEF11		-0.747479	ND
+pH fractionation/SP	O15417	Trinucleotide repeat-containing gene 18 protein OS=Homo sapiens OX=9606 GN=TNRC18 PE=1 SV=3	ENSG00000182095	TNRC18		1.04468	0.221891
+pH fractionation/SP	O15525	Transcription factor MafG OS=Homo sapiens OX=9606 GN=MAFG PE=1 SV=1	ENSG00000197063	MAFG		0.632965	0.482559
+pH fractionation/SP	O75081	Protein CBFA2T3 OS=Homo sapiens OX=9606 GN=CBFA2T3 PE=1 SV=2	ENSG00000129993	CBFA2T3		-1.71722	ND
+pH fractionation/SP	O75326	Semaphorin-7A OS=Homo sapiens OX=9606 GN=SEMA7A PE=1 SV=1	ENSG00000138623	SEMA7A			ND
+pH fractionation/SP	O75400-3	Isoform 3 of Pre-mRNA-processing factor 40 homolog A OS=Homo sapiens OX=9606 GN=PRPF40A		PRPF40A		0.325461	0.584937
+pH fractionation/SP	O94880-2	Isoform 2 of PHD finger protein 14 OS=Homo sapiens OX=9606 GN=PHF14		PHF14		-0.101164	0.754056
+pH fractionation/SP	O95125	Zinc finger protein 202 OS=Homo sapiens OX=9606 GN=ZNF202 PE=1 SV=4	ENSG00000166261	ZNF202		0.534087	0.392063
+pH fractionation/SP	P10124	Serglycin OS=Homo sapiens OX=9606 GN=SRGN PE=1 SV=3	ENSG00000122862	SRGN		2.40219	0.241524
+pH fractionation/SP	P10244	Myb-related protein B OS=Homo sapiens OX=9606 GN=MYBL2 PE=1 SV=1	ENSG00000101057	MYBL2			ND
+pH fractionation/SP	P11161	E3 SUMO-protein ligase EGR2 OS=Homo sapiens OX=9606 GN=EGR2 PE=1 SV=3	ENSG00000122877	EGR2			ND
+pH fractionation/SP	P15884-3	Isoform SEF2-1D of Transcription factor 4 OS=Homo sapiens OX=9606 GN=TCF4	ENSG00000196628	TCF4		6.69326e-06	0.999992
+pH fractionation/SP	P16989-2	Isoform 2 of Y-box-binding protein 3 OS=Homo sapiens OX=9606 GN=YBX3	ENSG00000060138	CSDA; YBX3		-0.620737	ND
+pH fractionation/SP	P17041	Zinc finger protein 32 OS=Homo sapiens OX=9606 GN=ZNF32 PE=1 SV=2	ENSG00000169740	ZNF32		0.0762287	0.952921
+pH fractionation/SP	P18846	Cyclic AMP-dependent transcription factor ATF-1 OS=Homo sapiens OX=9606 GN=ATF1 PE=1 SV=2	ENSG00000123268	ATF1		-0.0443935	0.935769
+pH fractionation/SP	P32242	Homeobox protein OTX1 OS=Homo sapiens OX=9606 GN=OTX1 PE=1 SV=1	ENSG00000115507	OTX1		-1.95626	ND
+pH fractionation/SP	P38398-7	Isoform 7 of Breast cancer type 1 susceptibility protein OS=Homo sapiens OX=9606 GN=BRCA1	ENSG00000012048	BRCA1		-3.37321	0.0952648
+pH fractionation/SP	P43243-2	Isoform 2 of Matrin-3 OS=Homo sapiens OX=9606 GN=MATR3	ENSG00000015479	MATR3		-0.152438	0.958821
+pH fractionation/SP	P46939-2	Isoform 2 of Utrophin OS=Homo sapiens OX=9606 GN=UTRN		UTRN		0.878047	0.270302
+pH fractionation/SP	P49674	Casein kinase I isoform epsilon OS=Homo sapiens OX=9606 GN=CSNK1E PE=1 SV=1	ENSG00000213923	CSNK1E; LOC400927-CSNK1E		-0.694887	0.582676
+pH fractionation/SP	P55197	Protein AF-10 OS=Homo sapiens OX=9606 GN=MLLT10 PE=1 SV=2	ENSG00000078403	MLLT10		-1.2453	0.00199132
+pH fractionation/SP	P55265-2	Isoform 2 of Double-stranded RNA-specific adenosine deaminase OS=Homo sapiens OX=9606 GN=ADAR		ADAR		0.137615	0.939833
+pH fractionation/SP	P79522	Proline-rich protein 3 OS=Homo sapiens OX=9606 GN=PRR3 PE=1 SV=2	ENSG00000228186	PRR3		-0.51121	0.453162
+pH fractionation/SP	Q02446	Transcription factor Sp4 OS=Homo sapiens OX=9606 GN=SP4 PE=1 SV=2	ENSG00000105866	SP4		1.67794	0.32753
+pH fractionation/SP	Q12816	Trophinin OS=Homo sapiens OX=9606 GN=TRO PE=1 SV=3	ENSG00000067445	TRO		0.428944	ND
+pH fractionation/SP	Q13330-3	Isoform 3 of Metastasis-associated protein MTA1 OS=Homo sapiens OX=9606 GN=MTA1	ENSG00000182979	MTA1		0.654062	ND
+pH fractionation/SP	Q13428-7	Isoform 7 of Treacle protein OS=Homo sapiens OX=9606 GN=TCOF1	ENSG00000070814	TCOF1		0.20038	0.805719
+pH fractionation/SP	Q14781	Chromobox protein homolog 2 OS=Homo sapiens OX=9606 GN=CBX2 PE=1 SV=2	ENSG00000173894	CBX2		0.0282081	0.97155
+pH fractionation/SP	Q14938	Nuclear factor 1 X-type OS=Homo sapiens OX=9606 GN=NFIX PE=1 SV=2	ENSG00000008441	NFIX		-0.099263	0.934948
+pH fractionation/SP	Q15651	High mobility group nucleosome-binding domain-containing protein 3 OS=Homo sapiens OX=9606 GN=HMGN3 PE=1 SV=2	ENSG00000118418	HMGN3		0.211683	0.79339
+pH fractionation/SP	Q15697	Zinc finger protein 174 OS=Homo sapiens OX=9606 GN=ZNF174 PE=1 SV=1	ENSG00000103343	ZNF174		-0.482722	ND
+pH fractionation/SP	Q16643-2	Isoform 2 of Drebrin OS=Homo sapiens OX=9606 GN=DBN1	ENSG00000113758	DBN1		1.19532	0.353358
+pH fractionation/SP	Q4AC94	C2 domain-containing protein 3 OS=Homo sapiens OX=9606 GN=C2CD3 PE=1 SV=4	ENSG00000168014	C2CD3		-0.102577	0.943335
+pH fractionation/SP	Q4W5G0	Tigger transposable element-derived protein 2 OS=Homo sapiens OX=9606 GN=TIGD2 PE=3 SV=1	ENSG00000180346	TIGD2		0.446412	0.594511
+pH fractionation/SP	Q569K4	Zinc finger protein 385B OS=Homo sapiens OX=9606 GN=ZNF385B PE=1 SV=1	ENSG00000144331	ZNF385B			ND
+pH fractionation/SP	Q6PI47	BTB/POZ domain-containing protein KCTD18 OS=Homo sapiens OX=9606 GN=KCTD18 PE=2 SV=2	ENSG00000155729	KCTD18		-0.0532121	0.873946
+pH fractionation/SP	Q6UB99	Ankyrin repeat domain-containing protein 11 OS=Homo sapiens OX=9606 GN=ANKRD11 PE=1 SV=3	ENSG00000167522	ANKRD11		-0.0929183	0.981352
+pH fractionation/SP	Q7Z333-4	Isoform 4 of Probable helicase senataxin OS=Homo sapiens OX=9606 GN=SETX		SETX		-0.283121	ND
+pH fractionation/SP	Q7Z6I8	UPF0461 protein C5orf24 OS=Homo sapiens OX=9606 GN=C5orf24 PE=1 SV=1	ENSG00000181904	C5orf24		0.161721	0.729592
+pH fractionation/SP	Q8IV32	Coiled-coil domain-containing protein 71 OS=Homo sapiens OX=9606 GN=CCDC71 PE=1 SV=3	ENSG00000177352	CCDC71		-0.363044	0.684163
+pH fractionation/SP	Q8IX21-2	Isoform 2 of SMC5-SMC6 complex localization factor protein 2 OS=Homo sapiens OX=9606 GN=SLF2	ENSG00000119906	FAM178A; SLF2		-0.925876	0.398444
+pH fractionation/SP	Q8N3J9	Zinc finger protein 664 OS=Homo sapiens OX=9606 GN=ZNF664 PE=1 SV=1	ENSG00000179195	ZNF664		-0.626566	0.518368
+pH fractionation/SP	Q8NEY8	Periphilin-1 OS=Homo sapiens OX=9606 GN=PPHLN1 PE=1 SV=2	ENSG00000134283	PPHLN1		0.396872	0.555793
+pH fractionation/SP	Q8NEY8-6	Isoform 6 of Periphilin-1 OS=Homo sapiens OX=9606 GN=PPHLN1	ENSG00000134283	PPHLN1		-0.823984	0.263533
+pH fractionation/SP	Q8NHZ8	Anaphase-promoting complex subunit CDC26 OS=Homo sapiens OX=9606 GN=CDC26 PE=1 SV=1	ENSG00000176386	CDC26		0.988667	0.297835
+pH fractionation/SP	Q8WUI4-8	Isoform 8 of Histone deacetylase 7 OS=Homo sapiens OX=9606 GN=HDAC7		HDAC7		-0.254283	ND
+pH fractionation/SP	Q8WUZ0-2	Isoform 2 of B-cell CLL/lymphoma 7 protein family member C OS=Homo sapiens OX=9606 GN=BCL7C	ENSG00000099385	BCL7C		2.87477	ND
+pH fractionation/SP	Q8WYB5	Histone acetyltransferase KAT6B OS=Homo sapiens OX=9606 GN=KAT6B PE=1 SV=3	ENSG00000281813	KAT6B		-0.173787	0.883434
+pH fractionation/SP	Q92618	Zinc finger protein 516 OS=Homo sapiens OX=9606 GN=ZNF516 PE=1 SV=1	ENSG00000101493	ZNF516		1.09827	ND
+pH fractionation/SP	Q969J2	Zinc finger protein with KRAB and SCAN domains 4 OS=Homo sapiens OX=9606 GN=ZKSCAN4 PE=1 SV=1	ENSG00000187626	ZKSCAN4		0.373655	0.339574
+pH fractionation/SP	Q96AK3	DNA dC->dU-editing enzyme APOBEC-3D OS=Homo sapiens OX=9606 GN=APOBEC3D PE=1 SV=1	ENSG00000243811	APOBEC3D			ND
+pH fractionation/SP	Q96BD5-3	Isoform 3 of PHD finger protein 21A OS=Homo sapiens OX=9606 GN=PHF21A		PHF21A		-0.780083	0.638033
+pH fractionation/SP	Q96D31	Calcium release-activated calcium channel protein 1 OS=Homo sapiens OX=9606 GN=ORAI1 PE=1 SV=2		ORAI1		-0.283022	ND
+pH fractionation/SP	Q96DN5	TBC1 domain family member 31 OS=Homo sapiens OX=9606 GN=TBC1D31 PE=1 SV=2	ENSG00000156787	WDR67; TBC1D31			ND
+pH fractionation/SP	Q96GD3	Polycomb protein SCMH1 OS=Homo sapiens OX=9606 GN=SCMH1 PE=1 SV=1	ENSG00000010803	SCMH1		-1.52907	0.0822838
+pH fractionation/SP	Q96GE4	Centrosomal protein of 95 kDa OS=Homo sapiens OX=9606 GN=CEP95 PE=1 SV=1	ENSG00000258890	CEP95		-1.03314	0.0601237
+pH fractionation/SP	Q96HI0	Sentrin-specific protease 5 OS=Homo sapiens OX=9606 GN=SENP5 PE=1 SV=3	ENSG00000119231	SENP5		-1.25256	0.259324
+pH fractionation/SP	Q96IT1-2	Isoform 2 of Zinc finger protein 496 OS=Homo sapiens OX=9606 GN=ZNF496		ZNF496		-0.226033	0.864525
+pH fractionation/SP	Q96JM2-3	Isoform 3 of Zinc finger protein 462 OS=Homo sapiens OX=9606 GN=ZNF462		ZNF462		1.46502	ND
+pH fractionation/SP	Q96MT8	Centrosomal protein of 63 kDa OS=Homo sapiens OX=9606 GN=CEP63 PE=1 SV=1	ENSG00000182923	CEP63		0.5277	ND
+pH fractionation/SP	Q99684	Zinc finger protein Gfi-1 OS=Homo sapiens OX=9606 GN=GFI1 PE=1 SV=2	ENSG00000162676	GFI1		-0.982765	0.450657
+pH fractionation/SP	Q9C086	INO80 complex subunit B OS=Homo sapiens OX=9606 GN=INO80B PE=1 SV=2	ENSG00000115274	INO80B		0.474153	0.670147
+pH fractionation/SP	Q9H5V7	Zinc finger protein Pegasus OS=Homo sapiens OX=9606 GN=IKZF5 PE=1 SV=1	ENSG00000095574	IKZF5		1.86444	ND
+pH fractionation/SP	Q9NPA5	Zinc finger protein 64 homolog, isoforms 1 and 2 OS=Homo sapiens OX=9606 GN=ZFP64 PE=1 SV=3	ENSG00000020256	ZFP64		-0.0182444	0.982211
+pH fractionation/SP	Q9NQC1	E3 ubiquitin-protein ligase Jade-2 OS=Homo sapiens OX=9606 GN=JADE2 PE=1 SV=2	ENSG00000043143	PHF15; JADE2		-0.407276	0.452107
+pH fractionation/SP	Q9NS56	E3 ubiquitin-protein ligase Topors OS=Homo sapiens OX=9606 GN=TOPORS PE=1 SV=1	ENSG00000197579	TOPORS		-0.435211	0.824766
+pH fractionation/SP	Q9NWS9	Zinc finger protein 446 OS=Homo sapiens OX=9606 GN=ZNF446 PE=1 SV=1	ENSG00000083838	ZNF446		0.671676	0.156314
+pH fractionation/SP	Q9P2K5-2	Isoform 2 of Myelin expression factor 2 OS=Homo sapiens OX=9606 GN=MYEF2		MYEF2		1.52894	0.0406206
+pH fractionation/SP	Q9P2Y4	Zinc finger protein 219 OS=Homo sapiens OX=9606 GN=ZNF219 PE=1 SV=2	ENSG00000165804	ZNF219			ND
+pH fractionation/SP	Q9UJU2-6	Isoform 6 of Lymphoid enhancer-binding factor 1 OS=Homo sapiens OX=9606 GN=LEF1	ENSG00000138795	LEF1			ND
+pH fractionation/SP	Q9UK53	Inhibitor of growth protein 1 OS=Homo sapiens OX=9606 GN=ING1 PE=1 SV=2		ING1		0.917654	0.164192
+pH fractionation/SP	Q9UKK6	NTF2-related export protein 1 OS=Homo sapiens OX=9606 GN=NXT1 PE=1 SV=1	ENSG00000132661	NXT1		0.468047	0.74114
+pH fractionation/SP	Q9Y232	Chromodomain Y-like protein OS=Homo sapiens OX=9606 GN=CDYL PE=1 SV=2	ENSG00000153046	CDYL		-1.31772	0.553418
+pH fractionation/SP	Q9Y2Z9	Ubiquinone biosynthesis monooxygenase COQ6, mitochondrial OS=Homo sapiens OX=9606 GN=COQ6 PE=1 SV=2	ENSG00000119723	COQ6		-0.953358	0.372571
+pH fractionation/SP	Q9Y4A0	Jerky protein homolog-like OS=Homo sapiens OX=9606 GN=JRKL PE=2 SV=2	ENSG00000183340	JRKL		-0.055162	ND
+pH fractionation/SP	Q9Y4X4	Krueppel-like factor 12 OS=Homo sapiens OX=9606 GN=KLF12 PE=1 SV=2	ENSG00000118922	KLF12		1.8066	0.101628
-pH fractionation/SP	O15446-2	Isoform 2 of DNA-directed RNA polymerase I subunit RPA34 OS=Homo sapiens OX=9606 GN=CD3EAP	ENSG00000117877	CD3EAP		-1.07512	0.0109424
-pH fractionation/SP	O43189-2	Isoform 1 of PHD finger protein 1 OS=Homo sapiens OX=9606 GN=PHF1	ENSG00000112511	PHF1		0.157002	0.569749
-pH fractionation/SP	O60238	BCL2/adenovirus E1B 19 kDa protein-interacting protein 3-like OS=Homo sapiens OX=9606 GN=BNIP3L PE=1 SV=1	ENSG00000104765	BNIP3L			ND
-pH fractionation/SP	O75093	Slit homolog 1 protein OS=Homo sapiens OX=9606 GN=SLIT1 PE=2 SV=4	ENSG00000187122	SLIT1			ND
-pH fractionation/SP	O95067	G2/mitotic-specific cyclin-B2 OS=Homo sapiens OX=9606 GN=CCNB2 PE=1 SV=1	ENSG00000157456	CCNB2			ND
-pH fractionation/SP	P00734	Prothrombin OS=Homo sapiens OX=9606 GN=F2 PE=1 SV=2	ENSG00000180210	F2			ND
-pH fractionation/SP	P02656	Apolipoprotein C-III OS=Homo sapiens OX=9606 GN=APOC3 PE=1 SV=1	ENSG00000110245	APOC3		-0.638081	0.0070493
-pH fractionation/SP	P02679	Fibrinogen gamma chain OS=Homo sapiens OX=9606 GN=FGG PE=1 SV=3	ENSG00000171557	FGG			ND
-pH fractionation/SP	P07910	Heterogeneous nuclear ribonucleoproteins C1/C2 OS=Homo sapiens OX=9606 GN=HNRNPC PE=1 SV=4	ENSG00000092199	HNRNPC		-1.50623	0.0188258
-pH fractionation/SP	P15622	Zinc finger protein 250 OS=Homo sapiens OX=9606 GN=ZNF250 PE=1 SV=3	ENSG00000196150	ZNF250		-0.434113	0.358081
-pH fractionation/SP	P17535	Transcription factor jun-D OS=Homo sapiens OX=9606 GN=JUND PE=1 SV=3	ENSG00000130522	JUND		0.311722	0.135372
-pH fractionation/SP	P20265	POU domain, class 3, transcription factor 2 OS=Homo sapiens OX=9606 GN=POU3F2 PE=1 SV=4	ENSG00000184486	POU3F2		-2.04181	ND
-pH fractionation/SP	P24864	G1/S-specific cyclin-E1 OS=Homo sapiens OX=9606 GN=CCNE1 PE=1 SV=2	ENSG00000105173	CCNE1			ND
-pH fractionation/SP	P49760	Dual specificity protein kinase CLK2 OS=Homo sapiens OX=9606 GN=CLK2 PE=1 SV=1	ENSG00000261893	CLK2		-0.33653	ND
-pH fractionation/SP	P53567	CCAAT/enhancer-binding protein gamma OS=Homo sapiens OX=9606 GN=CEBPG PE=1 SV=1	ENSG00000153879	CEBPG			ND
-pH fractionation/SP	P56181	NADH dehydrogenase [ubiquinone] flavoprotein 3, mitochondrial OS=Homo sapiens OX=9606 GN=NDUFV3 PE=1 SV=2	ENSG00000160194	NDUFV3			ND
-pH fractionation/SP	P98175-3	Isoform 3 of RNA-binding protein 10 OS=Homo sapiens OX=9606 GN=RBM10	ENSG00000182872	RBM10		-0.623296	0.125357
-pH fractionation/SP	Q07687	Homeobox protein DLX-2 OS=Homo sapiens OX=9606 GN=DLX2 PE=1 SV=2	ENSG00000115844	DLX2			ND
-pH fractionation/SP	Q12968	Nuclear factor of activated T-cells, cytoplasmic 3 OS=Homo sapiens OX=9606 GN=NFATC3 PE=1 SV=1	ENSG00000072736	NFATC3			ND
-pH fractionation/SP	Q13064	Probable E3 ubiquitin-protein ligase makorin-3 OS=Homo sapiens OX=9606 GN=MKRN3 PE=1 SV=1	ENSG00000179455	MKRN3			ND
-pH fractionation/SP	Q13434	Putative E3 ubiquitin-protein ligase makorin-4 OS=Homo sapiens OX=9606 GN=MKRN4P PE=5 SV=1		MKRN4P		0.171955	0.732552
-pH fractionation/SP	Q14746	Conserved oligomeric Golgi complex subunit 2 OS=Homo sapiens OX=9606 GN=COG2 PE=1 SV=1	ENSG00000135775	COG2		-0.165741	0.604668
-pH fractionation/SP	Q15366-3	Isoform 3 of Poly(rC)-binding protein 2 OS=Homo sapiens OX=9606 GN=PCBP2	ENSG00000197111	PCBP2		-0.119702	0.85924
-pH fractionation/SP	Q15744	CCAAT/enhancer-binding protein epsilon OS=Homo sapiens OX=9606 GN=CEBPE PE=1 SV=2	ENSG00000092067	CEBPE		0.695426	0.216684
-pH fractionation/SP	Q3ZCT1	Zinc finger protein 260 OS=Homo sapiens OX=9606 GN=ZNF260 PE=1 SV=3	ENSG00000254004	ZNF260		-1.46054	ND
-pH fractionation/SP	Q5VSY0	G kinase-anchoring protein 1 OS=Homo sapiens OX=9606 GN=GKAP1 PE=1 SV=2	ENSG00000165113	GKAP1		-0.720774	0.208197
-pH fractionation/SP	Q659C4	La-related protein 1B OS=Homo sapiens OX=9606 GN=LARP1B PE=1 SV=2	ENSG00000138709	LARP1B			ND
-pH fractionation/SP	Q69YU5	Uncharacterized protein C12orf73 OS=Homo sapiens OX=9606 GN=C12orf73 PE=3 SV=2	ENSG00000204954	C12orf73			ND
-pH fractionation/SP	Q6SJ96	TATA box-binding protein-like protein 2 OS=Homo sapiens OX=9606 GN=TBPL2 PE=2 SV=1	ENSG00000182521	TBPL2			ND
-pH fractionation/SP	Q8N0Z3	Spindle and centriole-associated protein 1 OS=Homo sapiens OX=9606 GN=SPICE1 PE=1 SV=1	ENSG00000163611	SPICE1		0.176304	0.661463
-pH fractionation/SP	Q8N5L8	Ribonuclease P protein subunit p25-like protein OS=Homo sapiens OX=9606 GN=RPP25L PE=1 SV=1	ENSG00000164967	RPP25L		-1.18345	0.0880367
-pH fractionation/SP	Q8N8U2	Chromodomain Y-like protein 2 OS=Homo sapiens OX=9606 GN=CDYL2 PE=1 SV=2	ENSG00000166446	CDYL2		0.702926	0.115509
-pH fractionation/SP	Q8NAF0	Zinc finger protein 579 OS=Homo sapiens OX=9606 GN=ZNF579 PE=1 SV=2	ENSG00000218891	ZNF579		0.589845	0.096106
-pH fractionation/SP	Q8NBM4	Ubiquitin-associated domain-containing protein 2 OS=Homo sapiens OX=9606 GN=UBAC2 PE=1 SV=1	ENSG00000134882	UBAC2			ND
-pH fractionation/SP	Q8NBZ0	INO80 complex subunit E OS=Homo sapiens OX=9606 GN=INO80E PE=1 SV=1	ENSG00000169592	INO80E		1.27291	ND
-pH fractionation/SP	Q8TBE0	Bromo adjacent homology domain-containing 1 protein OS=Homo sapiens OX=9606 GN=BAHD1 PE=1 SV=2	ENSG00000140320	BAHD1		-0.445194	0.642583
-pH fractionation/SP	Q8WUU5	GATA zinc finger domain-containing protein 1 OS=Homo sapiens OX=9606 GN=GATAD1 PE=1 SV=1	ENSG00000157259	GATAD1		-0.312397	ND
-pH fractionation/SP	Q8WVR3	Uncharacterized protein C7orf43 OS=Homo sapiens OX=9606 GN=C7orf43 PE=1 SV=2	ENSG00000146826	C7orf43		0.62094	ND
-pH fractionation/SP	Q96NB3	Zinc finger protein 830 OS=Homo sapiens OX=9606 GN=ZNF830 PE=1 SV=2	ENSG00000198783	ZNF830			ND
-pH fractionation/SP	Q96QE5	Transcription elongation factor, mitochondrial OS=Homo sapiens OX=9606 GN=TEFM PE=1 SV=1	ENSG00000172171	TEFM		0.126003	0.768803
-pH fractionation/SP	Q96SK2	Transmembrane protein 209 OS=Homo sapiens OX=9606 GN=TMEM209 PE=1 SV=2	ENSG00000146842	TMEM209		-2.06551	ND
-pH fractionation/SP	Q9BRA0-2	Isoform 2 of N-alpha-acetyltransferase 38, NatC auxiliary subunit OS=Homo sapiens OX=9606 GN=NAA38	ENSG00000183011	LSMD1; NAA38		-0.881845	ND
-pH fractionation/SP	Q9BS18	Anaphase-promoting complex subunit 13 OS=Homo sapiens OX=9606 GN=ANAPC13 PE=1 SV=1	ENSG00000129055	ANAPC13		0.380061	0.298194
-pH fractionation/SP	Q9BSM1	Polycomb group RING finger protein 1 OS=Homo sapiens OX=9606 GN=PCGF1 PE=1 SV=2	ENSG00000115289	PCGF1			ND
-pH fractionation/SP	Q9BY77-2	Isoform 2 of Polymerase delta-interacting protein 3 OS=Homo sapiens OX=9606 GN=POLDIP3	ENSG00000100227	POLDIP3		-1.6998	0.0218296
-pH fractionation/SP	Q9HBD1	Roquin-2 OS=Homo sapiens OX=9606 GN=RC3H2 PE=1 SV=2	ENSG00000056586	RC3H2		-0.674818	0.473025
-pH fractionation/SP	Q9NRC8	NAD-dependent protein deacetylase sirtuin-7 OS=Homo sapiens OX=9606 GN=SIRT7 PE=1 SV=1	ENSG00000187531	SIRT7		0.519878	0.198374
-pH fractionation/SP	Q9NRR4	Ribonuclease 3 OS=Homo sapiens OX=9606 GN=DROSHA PE=1 SV=2	ENSG00000113360	DROSHA		-0.868499	0.00975923
-pH fractionation/SP	Q9NRW3	DNA dC->dU-editing enzyme APOBEC-3C OS=Homo sapiens OX=9606 GN=APOBEC3C PE=1 SV=2	ENSG00000244509	APOBEC3C		1.51189	ND
-pH fractionation/SP	Q9NWZ8	Gem-associated protein 8 OS=Homo sapiens OX=9606 GN=GEMIN8 PE=1 SV=1	ENSG00000046647	GEMIN8		-0.730607	0.292248
-pH fractionation/SP	Q9NYL2	Mitogen-activated protein kinase kinase kinase 20 OS=Homo sapiens OX=9606 GN=MAP3K20 PE=1 SV=3	ENSG00000091436	ZAK; MAP3K20		-0.324674	0.219728
-pH fractionation/SP	Q9UBC3	DNA (cytosine-5)-methyltransferase 3B OS=Homo sapiens OX=9606 GN=DNMT3B PE=1 SV=1	ENSG00000088305	DNMT3B		-0.0764451	0.561599
-pH fractionation/SP	Q9UIS9-12	Isoform 12 of Methyl-CpG-binding domain protein 1 OS=Homo sapiens OX=9606 GN=MBD1	ENSG00000141644	MBD1		1.0528	0.0111881
-pH fractionation/SP	Q9ULU4-10	Isoform 10 of Protein kinase C-binding protein 1 OS=Homo sapiens OX=9606 GN=ZMYND8		ZMYND8		0.419237	0.41065
-pH fractionation/SP	Q9ULX9	Transcription factor MafF OS=Homo sapiens OX=9606 GN=MAFF PE=1 SV=2	ENSG00000185022	MAFF		1.55883	0.0184455
+pH fractionation/MAJIQ	Q13342	SP140 nuclear body protein [Source:HGNC Symbol;Acc:HGNC:17133]	ENSG00000079263	SP140	ENSG00000079263:t:231175458-231175566_231174754-231175458_S0	2.50313	0.0665024
+pH fractionation/MAJIQ	Q8WXW3	progesterone immunomodulatory binding factor 1 [Source:HGNC Symbol;Acc:HGNC:23352]	ENSG00000083535	PIBF1	ENSG00000083535:t:73482669-73482819_73468087-73482669_L1	-1.0916	0.427602
+pH fractionation/MAJIQ	O96028	nuclear receptor binding SET domain protein 2 [Source:HGNC Symbol;Acc:HGNC:12766]	ENSG00000109685	NSD2	ENSG00000109685:t:1952799-1952984_1936989-1952799_S2	-0.81261	0.603101
+pH fractionation/MAJIQ	Q9UPT8	zinc finger CCCH-type containing 4 [Source:NCBI gene;Acc:23211]:	ENSG00000130749	AC008755.1	ENSG00000130749:t:47597646-47597865_47597865-47615405_L2	-0.140354	0.0872891
+pH fractionation/MAJIQ	Q6PJE2	POM121 and ZP3 fusion [Source:HGNC Symbol;Acc:HGNC:9203]	ENSG00000146707	POMZP3	ENSG00000146707:s:76254839-76255000_76247932-76254839_L1	-0.959814	0.359521
+pH fractionation/MAJIQ	Q96DN5	TBC1 domain family member 31 [Source:HGNC Symbol;Acc:HGNC:30888]	ENSG00000156787	TBC1D31	ENSG00000156787:t:124141306-124141458_124138927-124141310_S0	0.499261	ND
+pH fractionation/MAJIQ	Q8TCN5	zinc finger protein 507 [Source:HGNC Symbol;Acc:HGNC:23783]	ENSG00000168813	ZNF507	ENSG00000168813:s:32836500-32836992_32836689-32843735_S0		ND
+pH fractionation/MAJIQ	Q9Y2D5	A-kinase anchoring protein 2 [Source:HGNC Symbol;Acc:HGNC:372]	ENSG00000241978	AKAP2	ENSG00000241978:t:112930679-112934792_112918777-112930679_L2	0.106605	0.927819
-pH fractionation/MAJIQ		ENSG00000108292:s:36871865-36872588 OS=Homo sapiens GN=ENSG00000108292	ENSG00000108292		ENSG00000108292:s:36871865-36872588_36872081-36872620_L0	3.09957	ND
-pH fractionation/MAJIQ		ENSG00000118058:s:118339490-118339559 OS=Homo sapiens GN=ENSG00000118058	ENSG00000118058	KMT2A	ENSG00000118058:s:118339490-118339559_118339559-118342377_L0	-0.200196	0.304243
-pH fractionation/MAJIQ		ENSG00000123146:s:14501736-14502009 OS=Homo sapiens GN=ENSG00000123146	ENSG00000123146	ADGRE5	ENSG00000123146:s:14501736-14502009_14501891-14507154_L1	-1.36227	0.0126347
-pH fractionation/MAJIQ		ENSG00000198538:s:53311129-53311386 OS=Homo sapiens GN=ENSG00000198538	ENSG00000198538	ZNF28	ENSG00000198538:s:53311129-53311386_53304955-53311260_S0	-2.48106	0.0216837
+pH fractionation/RefSeq	Q6ULP2	aftiphilin (AFTPH), transcript variant 1, mRNA	ENSG00000119844	AFTPH	NM_203437.3_1	-0.00571895	0.994743
+pH fractionation/RefSeq		chromosome X open reading frame 23 (CXorf23), mRNA		CXorf23	NM_198279.3_3	1.82603	ND
+pH fractionation/RefSeq	Q14156	EFR3 homolog A (EFR3A), transcript variant 7, mRNA	ENSG00000132294	EFR3A	NM_001323558.1_3	0.560789	0.357306
+pH fractionation/RefSeq	P23769	GATA binding protein 2 (GATA2), transcript variant 3, mRNA	ENSG00000179348	GATA2	NM_001145662.1_1	2.18304	0.03903
+pH fractionation/RefSeq	P62807	histone cluster 1 H2B family member c (HIST1H2BC), mRNA	ENSG00000180596	HIST1H2BC	NM_003526.2_3	1.18955	0.648457
+pH fractionation/RefSeq		INO80B-WBP1 readthrough (NMD candidate) (INO80B-WBP1), long non-coding RNA	ENSG00000274049	INO80B-WBP1	NR_037849.1_1	0.464453	0.690372
+pH fractionation/RefSeq	Q8NGC2	olfactory receptor family 4 subfamily E member 2 (OR4E2), mRNA	ENSG00000221977	OR4E2	NM_001001912.2_3	-0.0739459	0.905863
+pH fractionation/RefSeq	Q03052	POU class 3 homeobox 1 (POU3F1), mRNA	ENSG00000185668	POU3F1	NM_002699.3_2	-1.11831	0.385287
+pH fractionation/RefSeq	Q96P63	serpin family B member 12 (SERPINB12), transcript variant 1, mRNA	ENSG00000166634	SERPINB12	NM_001307928.1_3	0.330819	0.539677
+pH fractionation/RefSeq	Q96DN5	TBC1 domain family member 31 (TBC1D31), transcript variant 1, mRNA	ENSG00000156787	TBC1D31	NM_145647.3_3	-0.617786	0.704064
+pH fractionation/RefSeq	Q92754	transcription factor AP-2 gamma (TFAP2C), mRNA	ENSG00000087510	TFAP2C	NM_003222.3_3		ND
+pH fractionation/RefSeq	Q6ZU65	ubinuclein 2 (UBN2), mRNA	ENSG00000157741	UBN2	NM_173569.3_3	-1.1449	0.31275
+pH fractionation/RefSeq	Q8TCN5	zinc finger protein 507 (ZNF507), transcript variant 2, mRNA	ENSG00000168813	ZNF507	NM_014910.4_1		ND
+pH fractionation/RefSeq	Q8IZM8	zinc finger protein 654 (ZNF654), mRNA	ENSG00000175105	ZNF654	NM_018293.2_1	0.484239	ND
+pH fractionation/RefSeq	Q15696	zinc finger CCCH-type, RNA binding motif and serine/arginine rich 2 (ZRSR2), mRNA	ENSG00000169249	ZRSR2	NM_005089.3_3	-0.607927	ND
-pH fractionation/RefSeq		Homo sapiens uncharacterized LOC645967 (LOC645967), long non-coding RNA		LOC645967	NR_134652.1_1	-1.8238	ND
-pH fractionation/RefSeq		Homo sapiens histone cluster 1 H2B family member l (HIST1H2BL), mRNA		HIST1H2BL	NM_003519.3_1	2.89391	0.00238999
-pH fractionation/RefSeq		Homo sapiens ZBTB11 antisense RNA 1 (ZBTB11-AS1), long non-coding RNA		ZBTB11-AS1	NR_024407.1_2	-1.32413	0.00241779
-pH fractionation/RefSeq		Homo sapiens zinc finger protein 286A (ZNF286A), transcript variant 3, mRNA		ZNF286A	NM_001288642.1_2	-0.486396	0.311406

## Sheet: nucleo-cytoplasmic shuttling
Search files/database	SWISS-PROT Accession	Description	Ensembl ID	Gene Symbol	custom database Accession	log2 norm unstim_1	log2 norm unstim_2	log2 norm unstim_3	log2 norm stim_1	log2 norm stim_2	log2 norm stim_3
+pH fractionation/SP	O75554	WW domain-binding protein 4 OS=Homo sapiens OX=9606 GN=WBP4 PE=1 SV=1	ENSG00000120688	WBP4		-2.90634	-3.632	-5.34512				CYTOPLASMIC FRACTIONS
+pH fractionation/SP	P18583-3	Isoform B of Protein SON OS=Homo sapiens OX=9606 GN=SON	ENSG00000159140	SON		-5.88084	-5.95191	-5.99011
+pH fractionation/SP	Q01851	POU domain, class 4, transcription factor 1 OS=Homo sapiens OX=9606 GN=POU4F1 PE=2 SV=4	ENSG00000152192	POU4F1		-5.56551	-4.76965	-5.62424
+pH fractionation/SP	Q02086	Transcription factor Sp2 OS=Homo sapiens OX=9606 GN=SP2 PE=1 SV=3	ENSG00000167182	SP2		-7.38797	-6.07562	-3.42008
+pH fractionation/SP	Q6P2D0	Zinc finger protein 1 homolog OS=Homo sapiens OX=9606 GN=ZFP1 PE=1 SV=2	ENSG00000184517	ZFP1		-8.31703	-8.14251	-6.07912
+pH fractionation/SP	Q6UN15-3	Isoform 3 of Pre-mRNA 3'-end-processing factor FIP1 OS=Homo sapiens OX=9606 GN=FIP1L1	ENSG00000145216	FIP1L1		-1.06186	-1.4132	-2.11309
+pH fractionation/SP	Q86YD1	Prostate tumor-overexpressed gene 1 protein OS=Homo sapiens OX=9606 GN=PTOV1 PE=1 SV=1	ENSG00000104960	PTOV1		-3.53894	-3.76108	-4.7482
+pH fractionation/SP	Q8NC42	E3 ubiquitin-protein ligase RNF149 OS=Homo sapiens OX=9606 GN=RNF149 PE=2 SV=2	ENSG00000163162	RNF149		-3.26854	-3.68299	-4.18417
+pH fractionation/SP	Q8TEK3	Histone-lysine N-methyltransferase, H3 lysine-79 specific OS=Homo sapiens OX=9606 GN=DOT1L PE=1 SV=2		DOT1L		-4.60926	-4.61072	-3.5408
+pH fractionation/SP	Q9BQ95	Evolutionarily conserved signaling intermediate in Toll pathway, mitochondrial OS=Homo sapiens OX=9606 GN=ECSIT PE=1 SV=1	ENSG00000130159	ECSIT		-4.10936	-3.27235	-5.38241
+pH fractionation/SP	Q9BRR8	G patch domain-containing protein 1 OS=Homo sapiens OX=9606 GN=GPATCH1 PE=1 SV=1	ENSG00000076650	GPATCH1		-5.72702	-5.70484	-3.37913
+pH fractionation/SP	Q9BVW5	TIMELESS-interacting protein OS=Homo sapiens OX=9606 GN=TIPIN PE=1 SV=2	ENSG00000075131	TIPIN		-3.87812	-3.06919	-4.23699
+pH fractionation/SP	Q9H3H1	tRNA dimethylallyltransferase OS=Homo sapiens OX=9606 GN=TRIT1 PE=1 SV=1	ENSG00000043514	TRIT1		-3.77815	-3.26324	-6.09805
+pH fractionation/SP	Q9NPA3	Mid1-interacting protein 1 OS=Homo sapiens OX=9606 GN=MID1IP1 PE=1 SV=1	ENSG00000165175	MID1IP1		-3.79095	-3.34948	-2.10626
+pH fractionation/SP	Q9NYF8-3	Isoform 3 of Bcl-2-associated transcription factor 1 OS=Homo sapiens OX=9606 GN=BCLAF1	ENSG00000029363	BCLAF1		-5.04801	-4.8265	-4.77666
+pH fractionation/SP	Q9Y6A5	Transforming acidic coiled-coil-containing protein 3 OS=Homo sapiens OX=9606 GN=TACC3 PE=1 SV=1	ENSG00000013810	TACC3		-4.19623	-3.21773	-2.25179
+pH fractionation/MAJIQ	Q7L273	potassium channel tetramerization domain containing 9 [Source:HGNC Symbol;Acc:HGNC:22401]	ENSG00000104756	KCTD9	ENSG00000104756:t:25303596-25303766_25303766-25315715_S2	-1.93141	-2.23939	-7.13246
+pH fractionation/RefSeq	Q9HDC5	junctophilin 1 (JPH1), transcript variant 1, mRNA	ENSG00000104369	JPH1	NM_020647.3_2	-2.76875	-3.14392	-3.79987
+pH fractionation/RefSeq	P51955	NIMA related kinase 2 (NEK2), transcript variant 1, mRNA	ENSG00000117650	NEK2	NM_002497.3_1	-8.16422	-9.2113	-6.63076
+pH fractionation/RefSeq	Q7Z7C8	TATA-box binding protein associated factor 8 (TAF8), mRNA	ENSG00000137413	TAF8	NM_138572.2_2	-3.13939	-3.94761	-5.69804
+pH fractionation/SP	A8MW92-2	Isoform 2 of PHD finger protein 20-like protein 1 OS=Homo sapiens OX=9606 GN=PHF20L1	ENSG00000129292	PHF20L1					-5.47646	-7.03312	-7.01055
+pH fractionation/SP	P01106-2	Isoform 2 of Myc proto-oncogene protein OS=Homo sapiens OX=9606 GN=MYC	ENSG00000136997	MYC					-2.91122	-3.02519	-3.36323
+pH fractionation/SP	P20339	Ras-related protein Rab-5A OS=Homo sapiens OX=9606 GN=RAB5A PE=1 SV=2	ENSG00000144566	RAB5A					-2.41096	-0.955175	-3.47356
+pH fractionation/SP	P55198	Protein AF-17 OS=Homo sapiens OX=9606 GN=MLLT6 PE=1 SV=3		MLLT6					-4.61554	-0.730556	-4.90233
+pH fractionation/SP	P82909	28S ribosomal protein S36, mitochondrial OS=Homo sapiens OX=9606 GN=MRPS36 PE=1 SV=2	ENSG00000278461	MRPS36					-4.27013	-4.00693	-4.08838
+pH fractionation/SP	Q96HE9	Proline-rich protein 11 OS=Homo sapiens OX=9606 GN=PRR11 PE=1 SV=1	ENSG00000068489	PRR11					-4.9919	-4.12408	-4.65746
+pH fractionation/SP	Q96JY6-5	Isoform 5 of PDZ and LIM domain protein 2 OS=Homo sapiens OX=9606 GN=PDLIM2	ENSG00000120913	PDLIM2					-3.71793	-2.09695	-2.85156
+pH fractionation/SP	Q9Y6X3	MAU2 chromatid cohesion factor homolog OS=Homo sapiens OX=9606 GN=MAU2 PE=1 SV=2	ENSG00000129933	MAU2					-6.23245	-5.2366	-2.18282
+pH fractionation/SP	A0A0B4J237	T cell receptor alpha variable 8-2 OS=Homo sapiens OX=9606 GN=TRAV8-2 PE=3 SV=1	ENSG00000211786	TRAV8-2		-0.492295	-1.8148	-2.64379				NUCLEAR FRACTIONS
+pH fractionation/SP	O60337	E3 ubiquitin-protein ligase MARCH6 OS=Homo sapiens OX=9606 GN=MARCH6 PE=1 SV=2	ENSG00000145495	MARCH6		-7.15718	-2.96821	-6.10928
+pH fractionation/SP	O76080	AN1-type zinc finger protein 5 OS=Homo sapiens OX=9606 GN=ZFAND5 PE=1 SV=1	ENSG00000107372	ZFAND5		-4.45588	-7.00627	-4.79977
+pH fractionation/SP	P27448-7	Isoform 6 of MAP/microtubule affinity-regulating kinase 3 OS=Homo sapiens OX=9606 GN=MARK3		MARK3		-3.22451	-5.19297	-2.98627
+pH fractionation/SP	Q569K4	Zinc finger protein 385B OS=Homo sapiens OX=9606 GN=ZNF385B PE=1 SV=1	ENSG00000144331	ZNF385B		-2.36059	-4.21922	-2.05285
+pH fractionation/SP	Q6IQ23-2	Isoform 2 of Pleckstrin homology domain-containing family A member 7 OS=Homo sapiens OX=9606 GN=PLEKHA7		PLEKHA7		-8.21497	-6.70265	-3.05087
+pH fractionation/SP	Q9H5X1	MIP18 family protein FAM96A OS=Homo sapiens OX=9606 GN=FAM96A PE=1 SV=1	ENSG00000166797	FAM96A		-3.04698	-3.56073	-3.7713
+pH fractionation/SP	Q9UBS0	Ribosomal protein S6 kinase beta-2 OS=Homo sapiens OX=9606 GN=RPS6KB2 PE=1 SV=2	ENSG00000175634	RPS6KB2		-3.34412	-4.83733	-3.56982
+pH fractionation/RefSeq	Q6UWV6	ectonucleotide pyrophosphatase/phosphodiesterase 7 (ENPP7), mRNA	ENSG00000182156	ENPP7	NM_178543.4_1	-4.1704	-5.73902	-6.27379
+pH fractionation/SP	O94900	Thymocyte selection-associated high mobility group box protein TOX OS=Homo sapiens OX=9606 GN=TOX PE=1 SV=3	ENSG00000198846	TOX					-3.9571	-4.22833	-6.23964
+pH fractionation/SP	P03891	NADH-ubiquinone oxidoreductase chain 2 OS=Homo sapiens OX=9606 GN=MT-ND2 PE=1 SV=2	ENSG00000198763	ND2					-5.0107	-4.96353	-7.32466
+pH fractionation/SP	P49914	5-formyltetrahydrofolate cyclo-ligase OS=Homo sapiens OX=9606 GN=MTHFS PE=1 SV=2	ENSG00000136371	MTHFS					-4.05941	-4.94188	-6.13281
+pH fractionation/SP	Q01851	POU domain, class 4, transcription factor 1 OS=Homo sapiens OX=9606 GN=POU4F1 PE=2 SV=4	ENSG00000152192	POU4F1					-2.33665	-1.258	-1.82923
+pH fractionation/SP	Q95604	HLA class I histocompatibility antigen, Cw-17 alpha chain OS=Homo sapiens OX=9606 GN=HLA-C PE=1 SV=1		HLA-C					-3.70282	-4.5807	-3.95702
+pH fractionation/SP	Q96AK3	DNA dC->dU-editing enzyme APOBEC-3D OS=Homo sapiens OX=9606 GN=APOBEC3D PE=1 SV=1	ENSG00000243811	APOBEC3D					-2.05261	-3.16936	-3.95039
+pH fractionation/SP	Q96MX0	CKLF-like MARVEL transmembrane domain-containing protein 3 OS=Homo sapiens OX=9606 GN=CMTM3 PE=1 SV=1	ENSG00000140931	CMTM3					-4.23524	-4.41016	-3.53172
+pH fractionation/SP	Q99470	Stromal cell-derived factor 2 OS=Homo sapiens OX=9606 GN=SDF2 PE=1 SV=2	ENSG00000132581	SDF2					-6.36424	-4.1915	-2.84464
+pH fractionation/SP	Q9P2Y4	Zinc finger protein 219 OS=Homo sapiens OX=9606 GN=ZNF219 PE=1 SV=2	ENSG00000165804	ZNF219					-3.45707	-3.99885	-3.70012
+pH fractionation/SP	Q9UJU2-6	Isoform 6 of Lymphoid enhancer-binding factor 1 OS=Homo sapiens OX=9606 GN=LEF1	ENSG00000138795	LEF1					-0.570886	-1.73022	-2.55403
+pH fractionation/SP	Q9ULP9	TBC1 domain family member 24 OS=Homo sapiens OX=9606 GN=TBC1D24 PE=1 SV=2	ENSG00000162065	TBC1D24					-7.91429	-5.3042	-4.87643
+pH fractionation/MAJIQ	Q641Q2		ENSG00000152726	ENSG00000152726	ENSG00000152726:s:47894572-47894634_47894634-47896656_L0				-6.52607	-3.47646	-3.66212
