# Supplementary material for: Deep profiling and custom databases improve detection of proteoforms generated by alternative splicing
Source: HighWire-hosted journal article supplement (doi:10.1101/gr.248435.119), 2019-11-14
Supplement: Supplemental_Table_S7.xlsx [file Supplemental_Table_S7.xlsx]

## Sheet: proteoforms
Supplemental Table S7: List of identified proteoforms							CYTOPLASMIC FRACTIONS									NUCLEAR FRACTIONS
Search files/database	SwissProt Accession	custom database Accession	Description	Ensembl ID	Gene Symbol	Exp. q-value: Combined	unstim_cyto (average)	stim_cyto (average)	unstim_cyto (stdev)	stim_cyto (stdev)	p.value	adjusted p.value	log2FC_cyto (S/U)	p.value (imputed MVs)	adjusted p.value	unstim_nuc (average)	stim_nuc (average)	unstim_nuc (stdev)	stim_nuc (stdev)	p.value	adjusted p.value	log2FC_nuc (S/U)	p.value (imputed MVs)	adjusted p.value
MAJIQ		ENSG00000214331:s:74382765-74382913_74376152-74382765_S0	pyruvate dehydrogenase phosphatase regulatory subunit (PDPR) pseudogene:::	ENSG00000214331	AC009053.1	0.007	-0.499208	0.452776	0.193732	0.346288	0.0141969	0.31199	2.87907	3.8679e-05	0.00959852	-2.75186	-1.69673	0.37251	1.49548	0.301325	0.979485	-1.91032	0.397508	0.521037
MAJIQ		ENSG00000214331:s:74382765-74382913_74376152-74382765_S2	pyruvate dehydrogenase phosphatase regulatory subunit (PDPR) pseudogene:::	ENSG00000214331	AC009053.1	0	1.31028	0.928745	1.10114	1.05159	0.72574	0.874878	3.17246	0.000920524	0.0378565	-0.934175	-4.94014		2.79168		NA	0.065406	0.467507	0.570723
MAJIQ		ENSG00000234231:s:88031906-88032140_88032140-88035193_L0	anaphase promoting complex subunit 1 (ANAPC1) pseudogene:::	ENSG00000234231	AC093616.1	0	-3.33456	-3.43601	1.33935	0.312279	0.926453	0.971826	1.60568	0.00329909	0.0494517	-0.24996	0.151331	1.05128	0.289621	0.649773	0.983961	6.08879	0.0704368	0.160258
MAJIQ		ENSG00000234231:t:88019326-88019540_88016309-88019326_L2	anaphase promoting complex subunit 1 (ANAPC1) pseudogene:::	ENSG00000234231	AC093616.1	0	-1.71416	-2.77825	1.20168	1.16672	0.332926	0.664326	0.116705	0.28629	0.473313	0.947585	0.243858	0.906126	2.04468	0.614713	0.983961	-0.232555	0.775169	0.843076
SwissProt	Q9UKV3		Apoptotic chromatin condensation inducer in the nucleus OS=Homo sapiens OX=9606 GN=ACIN1 PE=1 SV=2	ENSG00000100813	ACIN1	0	2.92019	2.30444	0.180405	0.318281	0.0434547	0.216358	-0.61575	0.0434547	0.225037	6.7074	6.51064	0.308136	0.24289	0.434092	0.808726	-0.196754	0.434092	0.815188
SwissProt	Q9UKV3-5		Isoform 4 of Apoptotic chromatin condensation inducer in the nucleus OS=Homo sapiens OX=9606 GN=ACIN1	ENSG00000100813	ACIN1	0	-4.84738	-6.65544	0.146526	0.164383	0.00733523	0.107588	-1.06683	0.134099	0.384095	-1.45183	-1.97199	0.83284	1.09848	0.549058	0.857951	-0.52016	0.549058	0.85761
SwissProt	P24666		Low molecular weight phosphotyrosine protein phosphatase OS=Homo sapiens OX=9606 GN=ACP1 PE=1 SV=3	ENSG00000143727	ACP1	0	1.99774	2.4977	0.327746	0.136163	0.0712118	0.274014	0.499958	0.0712118	0.285907	0.238971	0.359058	0.60068	1.03605	0.870553	0.964853	0.120087	0.870553	0.964679
SwissProt	P24666-2		Isoform 2 of Low molecular weight phosphotyrosine protein phosphatase OS=Homo sapiens OX=9606 GN=ACP1	ENSG00000143727	ACP1	0	-0.315602	-0.663241	0.547742	0.29695	0.484657	0.709915	-2.14913	0.306083	0.564047		-8.38306	N.D.	N.D.	N.D.	NA	-0.442665	0.516823	0.841442
SwissProt	P55265-2		Isoform 2 of Double-stranded RNA-specific adenosine deaminase OS=Homo sapiens OX=9606 GN=ADAR	ENSG00000160710	ADAR	0		-6.89218	N.D.	N.D.	N.D.	NA	-0.131194	0.672075	0.821879	0.0843198	0.221935	1.86884	1.77806	0.939833	0.984423	-2.10985	0.462067	0.827104
SwissProt	P55265-4		Isoform 4 of Double-stranded RNA-specific adenosine deaminase OS=Homo sapiens OX=9606 GN=ADAR	ENSG00000160710	ADAR	0	3.52029	3.98668	0.400329	0.578604	0.31491	0.576555	0.466393	0.31491	0.572695	6.50038	6.56495	0.173003	0.170157	0.668814	0.900458	0.0645722	0.668814	0.905278
RefSeq	Q9Y2D5	NM_001004065.4_3	A-kinase anchoring protein 2 (AKAP2), transcript variant 1, mRNA	ENSG00000241978	AKAP2	0	-2.15157	-1.40515	0.946586	0.250885	0.257247	0.522569	0.746415	0.257247	0.525231	1.06419	0.571308	0.356262	0.577186	0.276619	0.779563	-0.492882	0.276619	0.783476
RefSeq		NM_001198656.1_3	Homo sapiens A-kinase anchoring protein 2 (AKAP2), transcript variant 3, mRNA	ENSG00000241978	AKAP2	0	-3.57118	-3.47096	0.885431	0.140023	0.888893	0.916786	0.10022	0.888893	0.919775	-3.66601	-4.01804	0.041876			NA	-1.49322	0.32099	0.396139
SwissProt	Q6P6C2-1		Isoform 1 of RNA demethylase ALKBH5 OS=Homo sapiens OX=9606 GN=ALKBH5	ENSG00000091542	ALKBH5	0	-0.0558345	-0.264306	0.0687122	0.180886	0.135442	0.380862	-0.208471	0.135442	0.385898	2.00287	1.2985	0.174169	0.22029	0.0122111	0.249391	-0.704368	0.0122111	0.259106
SwissProt	Q6P6C2		RNA demethylase ALKBH5 OS=Homo sapiens OX=9606 GN=ALKBH5 PE=1 SV=2	ENSG00000091542	ALKBH5	0	-1.06412	-1.50894	0.306483	0.0589559	0.181396	0.290715	-0.441046	0.181795	0.30987	0.973567	-0.150164	0.012761	0.0036002	6.9603e-05	0.0111158	-1.12176	5.48573e-05	0.0106629
SwissProt	O15084		Serine/threonine-protein phosphatase 6 regulatory ankyrin repeat subunit A OS=Homo sapiens OX=9606 GN=ANKRD28 PE=1 SV=5	ENSG00000206560	ANKRD28	0	-0.587006	-0.824566	0.989382	0.687188	0.749862	0.870282	-0.237559	0.749862	0.867753	-1.53108	-0.795569	0.551403	0.447698	0.147328	0.574369	0.735516	0.147328	0.574992
SwissProt	O15084-1		Isoform 3 of Serine/threonine-protein phosphatase 6 regulatory ankyrin repeat subunit A OS=Homo sapiens OX=9606 GN=ANKRD28	ENSG00000206560	ANKRD28	0	-1.76703	-1.68472	0.139526	0.260436	0.731643	0.800309	0.0860844	0.7201	0.800681	-4.77255	-3.8476	0.994086	0.460219	0.35486	0.428471	0.926912	0.354365	0.447002
SwissProt	P56377-2		Isoform 2 of AP-1 complex subunit sigma-2 OS=Homo sapiens OX=9606 GN=AP1S2	ENSG00000182287	AP1S2	0.002	-4.96033	-3.64648	1.47537	0.551873	0.222058	0.483578	1.31385	0.222058	0.486613		-5.25357	N.D.	0.498993	N.D.	NA	1.12459	0.0722204	0.472522
SwissProt	P56377		AP-1 complex subunit sigma-2 OS=Homo sapiens OX=9606 GN=AP1S2 PE=1 SV=1	ENSG00000182287	AP1S2	0.002		-2.38196	N.D.	0.135734	N.D.	NA	3.2169	0.00145422	0.0323001			N.D.	N.D.	N.D.	NA	0.0425285	0.661043	0.72277
SwissProt	Q9BZZ5-2		Isoform 2 of Apoptosis inhibitor 5 OS=Homo sapiens OX=9606 GN=API5	ENSG00000166181	API5	0	2.67623	2.57728	0.0515094	0.103627	0.212696	0.475229	-0.0989568	0.212696	0.478753	4.2665	4.21763	0.287232	0.157302	0.808791	0.944036	-0.0488718	0.808791	0.947282
SwissProt	Q9BZZ5		Apoptosis inhibitor 5 OS=Homo sapiens OX=9606 GN=API5 PE=1 SV=3	ENSG00000166181	API5	0	2.33102	2.67559	0.175881	0.096497	0.135802	0.241856	0.348345	0.131878	0.252562	3.6984	3.42623	0.0385958	0.0758334	0.0455563	0.092653	-0.270205	0.0496942	0.109121
MAJIQ		ENSG00000243811:t:39427699-39427978_39419019-39427699_S1	apolipoprotein B mRNA editing enzyme catalytic subunit 3D [Source:HGNC Symbol;Acc:HGNC:17354]	ENSG00000243811	APOBEC3D	0	-0.906998	0.500936	0.365913	1.19977	0.123785	0.530258	-0.174699	0.389007	0.548188	-4.81236	-1.17285		0.935401		NA	-0.155925	0.0408383	0.116771
MAJIQ		ENSG00000243811:t:39427699-39427978_39425524-39427699_L0	ENSG00000243811:t:39427699-39427978 OS=Homo sapiens GN=ENSG00000243811	ENSG00000243811	APOBEC3D	0		-2.12533		0.397181		NA	-0.130947	0.492481	0.637899	-1.96902	-0.0437127	0.0924023	0.668783	0.0563375	0.118646	2.25533	0.00153949	0.0259941
SwissProt	Q8N6T3		ADP-ribosylation factor GTPase-activating protein 1 OS=Homo sapiens OX=9606 GN=ARFGAP1 PE=1 SV=2	ENSG00000101199	ARFGAP1	0	0.177883	0.110236	0.18815	0.352668	0.784005	0.89224	-0.0676465	0.784005	0.889662	-1.57136	-2.71418	0.732285	0.264477	0.0638224	0.455678	-1.14282	0.0638224	0.461811
SwissProt	Q8N6T3-2		Isoform 2 of ADP-ribosylation factor GTPase-activating protein 1 OS=Homo sapiens OX=9606 GN=ARFGAP1	ENSG00000101199	ARFGAP1	0	-0.969618	-1.36244	0.101092	0.779698	0.553052	0.64906	-0.389042	0.557371	0.665762	-4.92695	-3.86453	N.D.	N.D.	N.D.	NA	0.723609	0.636719	0.701693
SwissProt	P53367-2		Isoform A of Arfaptin-1 OS=Homo sapiens OX=9606 GN=ARFIP1	ENSG00000164144	ARFIP1	0	0.0590953	0.841527	0.201619	0.187313	0.00790437	0.110461	0.782432	0.00790437	0.109918	-2.07699	-1.43174	1.12832	0.967922	0.494	0.836422	0.645244	0.494	0.836876
SwissProt	P53367		Arfaptin-1 OS=Homo sapiens OX=9606 GN=ARFIP1 PE=1 SV=2	ENSG00000164144	ARFIP1	0	-0.253924	0.312836	0.0482721	0.0511611	0.00761356	0.0525906	0.570538	0.0081434	0.0549138	-2.61721	-1.90227	N.D.	0.118114	N.D.	NA	2.55161	0.299088	0.397156
SwissProt	Q8N9N2-2		Isoform 2 of Activating signal cointegrator 1 complex subunit 1 OS=Homo sapiens OX=9606 GN=ASCC1	ENSG00000138303	ASCC1	0.001	-0.663979	-1.00949	0.839627	0.948611	0.661262	0.818578	-0.345513	0.661262	0.816303	-1.98423	-2.34823	0.406749	0.505897	0.386428	0.777525	-0.363998	0.386428	0.784415
SwissProt	Q8N9N2		Activating signal cointegrator 1 complex subunit 1 OS=Homo sapiens OX=9606 GN=ASCC1 PE=1 SV=1	ENSG00000138303	ASCC1	0.005	-2.69727	-3.02826	0.0669887	N.D.	N.D.	NA	-1.72968	0.342637	0.478128	-3.35503	-4.38687	0.0547217	0.0725174	0.00385352	0.027047	-1.02987	0.003638	0.0272107
SwissProt	O95260-2		Isoform ATE1-2 of Arginyl-tRNA--protein transferase 1 OS=Homo sapiens OX=9606 GN=ATE1	ENSG00000107669	ATE1	0.001	-2.77479	-4.80676	1.16682	2.82157	0.313241	0.574375	-2.03197	0.313241	0.570471	-7.23905	-4.6449	1.96529	N.D.	N.D.	NA	1.35818	0.352628	0.756555
SwissProt	O95260		Arginyl-tRNA--protein transferase 1 OS=Homo sapiens OX=9606 GN=ATE1 PE=1 SV=2	ENSG00000107669	ATE1	0.001	-1.14465	-1.46497	0.122467	0.0927607	0.0983419	0.198598	-0.316545	0.0992027	0.214056	-2.58849	-2.85344	0.0315474	0.0751093	0.0441621	0.0910721	-0.262985	0.0412073	0.0967115
SwissProt	Q9Y4P1		Cysteine protease ATG4B OS=Homo sapiens OX=9606 GN=ATG4B PE=1 SV=2	ENSG00000168397	ATG4B	0	0.527497	-0.0388013	0.545741	0.282653	0.185735	0.445271	-0.566298	0.185735	0.449353	-2.82318	-1.34225	1.06565	0.306159	0.0817235	0.478402	1.48093	0.0817235	0.485696
SwissProt	Q9Y4P1-2		Isoform 2 of Cysteine protease ATG4B OS=Homo sapiens OX=9606 GN=ATG4B	ENSG00000168397	ATG4B	0	0.00337002	0.142264	0.0902199	0.0625507	0.215473	0.325374	0.142671	0.204393	0.333863	-3.51654	-2.39135	N.D.	0.487556	N.D.	NA	2.61434	0.228933	0.327067
SwissProt	P46100		Transcriptional regulator ATRX OS=Homo sapiens OX=9606 GN=ATRX PE=1 SV=5	ENSG00000085224	ATRX	0	-0.782316	-0.414632	0.133235	0.0412498	0.0102914	0.121548	0.367685	0.0102914	0.121225	2.90491	3.2014	0.130656	0.130162	0.0495881	0.420376	0.296493	0.0495881	0.430409
SwissProt	P46100-2		Isoform 1 of Transcriptional regulator ATRX OS=Homo sapiens OX=9606 GN=ATRX	ENSG00000085224	ATRX	0	1.23597	0.597905	0.239425	0.424636	0.205373	0.315953	-0.634286	0.205517	0.335064	-3.3761	-0.503221	0.202175	0.122396	0.00336668	0.0262763	2.87485	0.00345161	0.0269453
SwissProt	Q8WWM7-3		Isoform 3 of Ataxin-2-like protein OS=Homo sapiens OX=9606 GN=ATXN2L	ENSG00000168488	ATXN2L	0	2.80059	2.2552	0.16938	0.100403	0.00866367	0.112897	-0.54539	0.00866367	0.111575	2.9009	1.76017	0.190828	0.253436	0.00338516	0.171024	-1.14073	0.00338516	0.170021
SwissProt	Q8WWM7		Ataxin-2-like protein OS=Homo sapiens OX=9606 GN=ATXN2L PE=1 SV=2	ENSG00000168488	ATXN2L	0	3.30376	2.5555	0.0658934	0.10523	0.0134884	0.0664225	-0.744482	0.013047	0.067804	2.42313	0.97741	0.027255	0.00571184	0.000185456	0.0128299	-1.44375	0.000189027	0.011748
RefSeq	O15523	NM_001313953.1_1	aurora kinase B (AURKB), transcript variant 7, mRNA	ENSG00000178999	AURKB	0	-1.23543	-0.450567	0.852932	0.52959	0.247169	0.511299	0.784859	0.247169	0.517026	2.05798	-0.666375	0.499319	0.307163	0.00129335	0.168318	-2.72436	0.00129335	0.168087
RefSeq		NR_132731.1_1	aurora kinase B (AURKB), transcript variant 11, non-coding RNA	ENSG00000178999	AURKB	0	-3.66074	-5.31005	0.391047	1.71119	0.180212	0.454664	-1.8966	0.0705833	0.322763	-0.183625	-4.00047	0.0994436	1.73308	0.0189677	0.344689	-3.81684	0.0189677	0.371135
MAJIQ		ENSG00000198604:s:35261981-35262127_35255207-35261981_S2	ENSG00000198604:s:35261981-35262127 OS=Homo sapiens GN=ENSG00000198604	ENSG00000198604	BAZ1A	0	-1.00002	-0.693143	0.186699	0.107785	0.181725	0.324214	0.291764	0.779553	0.867929	1.7238	1.51319	0.146957	0.248776	0.410964	0.490367	1.20509	0.0156606	0.065635
MAJIQ		ENSG00000198604:s:35261981-35262127_35255427-35261981_L2	bromodomain adjacent to zinc finger domain 1A [Source:HGNC Symbol;Acc:HGNC:960]	ENSG00000198604	BAZ1A	0	-3.86876					NA	0.124301	0.370222	0.530732	0.549248	0.916267	1.37782	0.208478	0.74584	0.983961	1.43845	0.0675873	0.158265
SwissProt	P54687-5		Isoform 5 of Branched-chain-amino-acid aminotransferase, cytosolic OS=Homo sapiens OX=9606 GN=BCAT1	ENSG00000060982	BCAT1	0	-0.42046	0.356694	0.662848	0.941513	0.307305	0.568041	0.777153	0.307305	0.565083	-2.86639	-3.41397	0.569725	0.0295058	0.287911	0.709704	-1.56034	0.216724	0.662063
SwissProt	P54687		Branched-chain-amino-acid aminotransferase, cytosolic OS=Homo sapiens OX=9606 GN=BCAT1 PE=1 SV=3	ENSG00000060982	BCAT1	0	-3.38689	-1.29061	0.468559	0.141797	0.0262013	0.0941459	2.10005	0.0258138	0.097829	-5.44529	-4.71813	N.D.	N.D.	N.D.	NA	0.439198	0.652653	0.715775
SwissProt	Q9P287		BRCA2 and CDKN1A-interacting protein OS=Homo sapiens OX=9606 GN=BCCIP PE=1 SV=1	ENSG00000107949	BCCIP	0	-0.933736	-1.65492	0.516899	0.583052	0.184174	0.444794	-0.721181	0.184174	0.449097	-2.04853	-3.68294	0.938086	2.08954	0.284098	0.709704	-1.63441	0.284098	0.707762
SwissProt	Q9P287-2		Isoform 2 of BRCA2 and CDKN1A-interacting protein OS=Homo sapiens OX=9606 GN=BCCIP	ENSG00000107949	BCCIP	0	1.81292	0.927723	0.509936	0.487476	0.0954503	0.320345	-0.8852	0.0954503	0.329509	0.351633	0.904259	0.0879984	0.357421	0.0600257	0.449274	0.552626	0.0600257	0.458973
SwissProt	Q9NYF8		Bcl-2-associated transcription factor 1 OS=Homo sapiens OX=9606 GN=BCLAF1 PE=1 SV=2	ENSG00000029363	BCLAF1	0	2.90349	1.57821	0.030539	0.55675	0.0146512	0.144103	-1.32528	0.0146512	0.146721	6.29453	5.94399	0.528937	0.710598	0.53075	0.8492	-0.350543	0.53075	0.849167
SwissProt	Q9NYF8-3		Isoform 3 of Bcl-2-associated transcription factor 1 OS=Homo sapiens OX=9606 GN=BCLAF1	ENSG00000029363	BCLAF1	0	-4.88372		0.144444	N.D.	N.D.	NA	-1.12879	0.000333487	0.0354238	-1.06631	-0.845991	1.67332	1.16932	0.860812	0.962254	0.22032	0.860812	0.962448
SwissProt	P55957		BH3-interacting domain death agonist OS=Homo sapiens OX=9606 GN=BID PE=1 SV=1	ENSG00000015475	BID	0	1.35129	0.477568	0.219467	1.08814	0.244481	0.506674	-0.87372	0.244481	0.50831	-2.47736	-3.06946	1.01116	0.779763	0.466895	0.823472	-0.592105	0.466895	0.827652
SwissProt	P55957-2		Isoform 2 of BH3-interacting domain death agonist OS=Homo sapiens OX=9606 GN=BID	ENSG00000015475	BID	0	2.63647	2.4164	0.123878	0.0731434	0.162972	0.272374	-0.216295	0.169846	0.296472	-1.61677	-1.11205	0.178755	0.190704	0.112017	0.174099	0.506678	0.114059	0.193955
SwissProt	Q12981		Vesicle transport protein SEC20 OS=Homo sapiens OX=9606 GN=BNIP1 PE=1 SV=3	ENSG00000113734	BNIP1	0.001	-1.47631	-2.08286	0.919689	1.17179	0.519548	0.732486	-0.606546	0.519548	0.728064	-5.08836	-3.95439	1.90692	1.52907	0.50967	0.83851	1.68426	0.264615	0.696109
SwissProt	Q12981-1		Isoform 3 of Vesicle transport protein SEC20 OS=Homo sapiens OX=9606 GN=BNIP1	ENSG00000113734	BNIP1	0.005	-1.979	-2.24437	0.0998516	0.0760223	0.0959935	0.195544	-0.261593	0.094376	0.206955		-4.03356	N.D.	0.375489	N.D.	NA	2.20588	0.0145152	0.0519055
SwissProt	Q9NXR7		BRISC and BRCA1-A complex member 2 OS=Homo sapiens OX=9606 GN=BABAM2 PE=1 SV=2	ENSG00000158019	BRE; BABAM2	0	0.135136	0.336758	0.293242	0.370211	0.500687	0.719373	0.201622	0.500687	0.715686	0.698292	0.0221208	0.0669037	0.470789	0.0694736	0.460647	-0.676171	0.0694736	0.467905
SwissProt	Q9NXR7-1		Isoform 1 of BRISC and BRCA1-A complex member 2 OS=Homo sapiens OX=9606 GN=BABAM2	ENSG00000158019	BRE; BABAM2	0	-1.65371	-0.828384	0.247561	0.0152106	0.0423114	0.121315	0.8291	0.0427316	0.129305	-1.61442	-2.3624	0.0290867	0.0166632	0.00100275	0.0185241	-0.746006	0.00110084	0.0186599
RefSeq	Q15813	NM_001288580.1_1	BRO1 domain and CAAX motif containing (BROX), transcript variant 3, mRNA	ENSG00000162819	BROX	0	-1.29768	-0.863804	0.359362	0.211954	0.146027	0.418797	0.433879	0.146027	0.431689	-5.56638	-4.91947		0.948544		NA	1.59244	0.0931563	0.589572
RefSeq	Q5VW32	NM_001288581.1_1	Homo sapiens BRO1 domain and CAAX motif containing (BROX), transcript variant 4, mRNA	ENSG00000162819	BROX	0	-2.36525	-2.01957	0.0168509	0.0261231	0.00401925	0.0455416	0.345678	0.00401925	0.0457478	-4.73251	-2.62968	0.344942	0.0624826	0.0136125	0.0418061	2.10283	0.0136125	0.0459877
SwissProt	P20290		Transcription factor BTF3 OS=Homo sapiens OX=9606 GN=BTF3 PE=1 SV=1	ENSG00000145741	BTF3	0	2.75775	1.86307	0.406527	0.38496	0.050443	0.229956	-0.894682	0.050443	0.239918	2.9315	1.53092	0.521685	0.530926	0.0311067	0.347558	-1.40058	0.0311067	0.359728
SwissProt	P20290-2		Isoform 2 of Transcription factor BTF3 OS=Homo sapiens OX=9606 GN=BTF3	ENSG00000145741	BTF3	0	-2.21521	-3.24827	0.214117	1.99223	0.537756	0.7433	0.41188	0.834629	0.917087	0.998275	-0.963798	1.90613	3.55001	0.446484	0.814328	-1.96207	0.446484	0.81855
MAJIQ		ENSG00000082153:t:201686870-201688569_201684843-201686870_S0	basic leucine zipper and W2 domains 1 [Source:HGNC Symbol;Acc:HGNC:18380]	ENSG00000082153	BZW1	0.008	-0.894399	0.183558	1.25156	0.231292	0.216283	0.598188	0.503914	0.595397	0.82637	-2.80737	-1.89705	0.600774	0.351959	0.156985	0.910738	-0.111114	0.950643	0.998293
MAJIQ		ENSG00000082153:t:201686870-201688569_201686028-201686870_L2	basic leucine zipper and W2 domains 1 [Source:HGNC Symbol;Acc:HGNC:18380]	ENSG00000082153	BZW1	0.004	0.760469	2.06173	0.536203	0.296152	0.0212142	0.31199	-0.746615	0.326936	0.701368	-0.997064	-0.235115	0.79787	1.21595	0.415499	0.979485	-0.699336	0.36824	0.98075
RefSeq	O15269	NM_001286191.1_1	chromosome 12 open reading frame 43 (C12orf43), transcript variant 1, mRNA	ENSG00000157895	C12orf43	0	-2.38848	-2.07745	0.634258	0.707701	0.601085	0.775593	0.311039	0.601085	0.774189	2.28434	1.41113	0.325941	0.513399	0.0676965	0.544713	-0.873212	0.0676965	0.571935
RefSeq	Q96C57	NM_001286192.1_1	Homo sapiens chromosome 12 open reading frame 43 (C12orf43), transcript variant 2, mRNA	ENSG00000157895	C12orf43	0	-2.66895	-2.68887	0.0773006	0.0755693	0.818792	0.863626	-0.0199188	0.818792	0.865276	1.54696	1.40716	0.076269	0.109669	0.277004	0.341215	-0.139798	0.277004	0.355353
SwissProt	O43852-3		Isoform 3 of Calumenin OS=Homo sapiens OX=9606 GN=CALU	ENSG00000128595	CALU	0	3.31701	2.56501	1.12598	0.666778	0.375903	0.628387	-0.752002	0.375903	0.622236	1.91354	1.133	1.1088	1.32951	0.478475	0.830025	-0.780547	0.478475	0.833616
SwissProt	O43852-4		Isoform 4 of Calumenin OS=Homo sapiens OX=9606 GN=CALU	ENSG00000128595	CALU	0	-2.50118	-3.27796	0.613797	N.D.	N.D.	NA	-2.63336	0.0572475	0.25719			N.D.	N.D.	N.D.	NA	0.290461	0.108882	0.52739
RefSeq	P17096	NM_001320898.1_1	Homo sapiens calcium/calmodulin dependent protein kinase II gamma (CAMK2G), transcript variant 8, mRNA	ENSG00000148660	CAMK2G	0	-1.87126	-1.18462	0.143204	0.235919	0.07214	0.159724	0.686648	0.07214	0.170521	-1.1605	-1.54253	0.104751	0.150531	0.0984926	0.148058	-0.38203	0.0984926	0.162517
RefSeq	P0DPB6	NM_172171.2_1	calcium/calmodulin dependent protein kinase II gamma (CAMK2G), transcript variant 1, mRNA	ENSG00000148660	CAMK2G	0	0.564241	0.202013	0.0517245	0.410086	0.20365	0.473106	-0.362228	0.20365	0.483001	1.455	1.53129	0.522332	0.592992	0.875309	0.97883	0.0762935	0.875309	0.980856
MAJIQ		ENSG00000164615:t:134079677-134079742_134074482-134079677_S0	calcium modulating ligand [Source:HGNC Symbol;Acc:HGNC:1471]	ENSG00000164615	CAMLG	0.008	-3.95512	-3.06304	1.86166	0.911107	0.497403	0.750997	0.188886	0.755591	0.85324	-4.71008	-5.55281	0.839	0.884922	0.359131	0.979485	-1.11912	0.0203158	0.0730481
MAJIQ		ENSG00000164615:t:134079677-134079742_134077213-134079677_L2	calcium modulating ligand [Source:HGNC Symbol;Acc:HGNC:1471]	ENSG00000164615	CAMLG	0.001	-0.515891	-0.629374	1.16071	1.24998	0.913815	0.965165	-1.51412	0.21918	0.402977	-1.90879	-1.672	0.852992	1.34173	0.819436	0.983961	0.667345	0.0263061	0.0874213
RefSeq	P04222	NM_001267056.1_2	caspase 7 (CASP7), transcript variant e, mRNA	ENSG00000165806	CASP7	0	0.145311	-0.00854717	0.275322	0.533723	0.680176	0.833642	-0.153858	0.680176	0.831799	-3.42123	-3.35222	1.2892	0.914705	0.943358	0.98692	0.069007	0.943358	0.985157
RefSeq	P55210	NM_001267057.1_2	Homo sapiens caspase 7 (CASP7), transcript variant f, mRNA	ENSG00000165806	CASP7	0	-1.5306	-0.939518	0.435332	0.0242955	0.195255	0.29939	0.59108	0.195255	0.316912						NA	0.238342	0.0517291	0.103093
SwissProt	Q13951		Core-binding factor subunit beta OS=Homo sapiens OX=9606 GN=CBFB PE=1 SV=2	ENSG00000067955	CBFB	0	2.0348	2.66795	0.401023	0.193938	0.0695519	0.271137	0.633153	0.0695519	0.282827	3.47163	3.2547	0.117108	0.121161	0.0896331	0.487136	-0.216929	0.0896331	0.493352
SwissProt	Q13951-2		Isoform 2 of Core-binding factor subunit beta OS=Homo sapiens OX=9606 GN=CBFB	ENSG00000067955	CBFB	0	-3.28695	-2.74603	0.769717	0.371458	0.437966	0.673851	-0.523384	0.676073	0.823244	-3.06544	-2.23142	1.75313	0.405989	0.573486	0.8669	-0.601781	0.750228	0.93056
RefSeq		NM_001277074.1_2	coiled-coil domain containing 12 (CCDC12), transcript variant 2, mRNA	ENSG00000160799	CCDC12	0	0.683637	-1.94066	0.576027	3.13061	0.22649	0.496414	-2.6243	0.22649	0.502794	2.25118	1.61231	1.32377	2.09046	0.677873	0.945745	-0.638866	0.677873	0.943199
RefSeq	Q9UBC3	NR_102269.1_2	Homo sapiens coiled-coil domain containing 12 (CCDC12), transcript variant 3, non-coding RNA	ENSG00000160799	CCDC12	0	-1.09453	-4.27911	0.23422			NA	-4.03141	0.0428866	0.12605	0.774401	0.00070646	0.12544	0.0652783	0.0162954	0.0450843	-0.773694	0.0162954	0.0498627
SwissProt	O75909		Cyclin-K OS=Homo sapiens OX=9606 GN=CCNK PE=1 SV=2	ENSG00000090061	CCNK	0	0.178383	-0.132151	0.475415	0.341446	0.410141	0.653994	-0.310533	0.410141	0.648504	0.661858	0.255771	0.166208	0.381489	0.16624	0.603493	-0.406087	0.16624	0.603577
SwissProt	O75909-4		Isoform 4 of Cyclin-K OS=Homo sapiens OX=9606 GN=CCNK	ENSG00000090061	CCNK	0.001	-1.28934	-0.700177	0.117724	0.14225	0.0457658	0.126638	0.592941	0.04654	0.136422	-1.8286	-2.62379	0.0858328	0.0195834	0.00607297	0.0307498	-0.793225	0.00584783	0.0321752
MAJIQ		ENSG00000228409:s:65225411-65225543_65225543-65226633_L1	chaperonin containing TCP1 subunit 6 pseudogene 1 [Source:HGNC Symbol;Acc:HGNC:33094]	ENSG00000228409	CCT6P1	0	4.05977	3.57149	0.455129	0.0608399	0.139307	0.550437	0.734862	0.083409	0.223102	0.261133	0.885384	0.509811	0.687622	0.275153	0.979485	0.151238	0.420663	0.537818
MAJIQ		ENSG00000228409:t:65220767-65220962_65219648-65220767_L0	chaperonin containing TCP1 subunit 6 pseudogene 1 [Source:HGNC Symbol;Acc:HGNC:33094]	ENSG00000228409	CCT6P1	0	4.00946	4.25084	0.180468	0.584542	0.531876	0.779854	-0.217781	0.176326	0.35052	2.31062	2.6101	0.896122	0.800744	0.68826	0.983961	0.10308	0.650464	0.734143
SwissProt	O15446		DNA-directed RNA polymerase I subunit RPA34 OS=Homo sapiens OX=9606 GN=CD3EAP PE=1 SV=1	ENSG00000117877	CD3EAP	0	-2.87345	-3.0152	1.29434	0.252012	0.861356	0.933411	-0.141751	0.861356	0.93212	2.30303	1.07051	0.407878	0.193395	0.00910939	0.232447	-1.23252	0.00910939	0.240436
SwissProt	O15446-2		Isoform 2 of DNA-directed RNA polymerase I subunit RPA34 OS=Homo sapiens OX=9606 GN=CD3EAP	ENSG00000117877	CD3EAP	0	-4.05804		N.D.	N.D.	N.D.	NA	-0.8539	0.382818	0.516295	2.03183	0.956709	0.152991	0.0480738	0.0109424	0.0405079	-1.07315	0.0112972	0.0450212
SwissProt	Q96JB5		CDK5 regulatory subunit-associated protein 3 OS=Homo sapiens OX=9606 GN=CDK5RAP3 PE=1 SV=2	ENSG00000108465	CDK5RAP3	0	0.515302	1.09237	0.799449	0.588084	0.370856	0.623412	0.577071	0.370856	0.617853	-1.3546	-0.636374	0.570778	0.452606	0.162872	0.600341	0.718223	0.162872	0.600284
SwissProt	Q96JB5-4		Isoform 4 of CDK5 regulatory subunit-associated protein 3 OS=Homo sapiens OX=9606 GN=CDK5RAP3	ENSG00000108465	CDK5RAP3	0	1.1344	1.40624	0.342196	0.0976425	0.392955	0.506741	0.275614	0.384548	0.517901	0.915981	0.981272	0.0701627	0.107577	0.546836	0.615215	0.0672583	0.523993	0.601781
MAJIQ		ENSG00000145996:t:21198252-21198335_21065459-21198252_S1	ENSG00000145996:t:21198252-21198335 OS=Homo sapiens GN=ENSG00000145996	ENSG00000145996	CDKAL1	0		-0.993468		0.196553		NA	2.45801	0.0110788	0.0847655		-1.92416				NA	-1.42023	0.0312572	0.0972993
MAJIQ		ENSG00000145996:t:21198252-21198335_21108694-21198252_L0	CDK5 regulatory subunit associated protein 1 like 1 [Source:HGNC Symbol;Acc:HGNC:21050]	ENSG00000145996	CDKAL1	0	-2.01462	-2.39172	0.491554	0.0670984	0.380995	0.694584	0.511656	0.0335425	0.140579	-4.85743					NA	-0.361297	0.0952899	0.199684
SwissProt	Q7Z7K6		Centromere protein V OS=Homo sapiens OX=9606 GN=CENPV PE=1 SV=1	ENSG00000166582	CENPV	0	-4.56978	-5.36348	N.D.	0.45466	N.D.	NA	0.428317	0.55793	0.753566	-0.805208	-1.12059	0.371343	0.642558	0.502536	0.83679	-0.315378	0.502536	0.83835
SwissProt	Q7Z7K6-3		Isoform 3 of Centromere protein V OS=Homo sapiens OX=9606 GN=CENPV	ENSG00000166582	CENPV	0	-3.97936	-4.13106	0.90823	1.32317	0.877894	0.942197	-0.151695	0.877894	0.940299	4.18896	3.56756	0.463152	0.558016	0.211932	0.657451	-0.621393	0.211932	0.656334
SwissProt	Q8IW35		Centrosomal protein of 97 kDa OS=Homo sapiens OX=9606 GN=CEP97 PE=1 SV=1	ENSG00000182504	CEP97	0	-2.16246	-1.68604	0.206212	0.50938	0.207609	0.470776	0.476418	0.207609	0.473254	-2.09011	-3.38888	0.566035	1.69006	0.275475	0.707407	-1.29878	0.275475	0.703518
SwissProt	Q8IW35-2		Isoform 2 of Centrosomal protein of 97 kDa OS=Homo sapiens OX=9606 GN=CEP97	ENSG00000182504	CEP97	0.001	-3.05601	-2.2418	0.521231	0.039403	0.158492	0.267336	0.817985	0.158492	0.286229		-4.84104	N.D.	0.232868	N.D.	NA	1.58104	0.010324	0.0429737
MAJIQ		ENSG00000170004:s:7812461-7812702_7812656-7813746_S0	chromodomain helicase DNA binding protein 3 [Source:HGNC Symbol;Acc:HGNC:1918]	ENSG00000170004	CHD3	0	-0.532948	-0.745866	1.96564	2.23126	0.907282	0.963188	-0.669953	0.560769	0.692231	2.75767	2.09068	0.595651	0.298954	0.158049	0.910738	-0.0564593	0.681775	0.759066
MAJIQ		ENSG00000170004:s:7812461-7812702_7812702-7813746_L0	ENSG00000170004:s:7812461-7812702 OS=Homo sapiens GN=ENSG00000170004	ENSG00000170004	CHD3	0	-0.357181	0.155758	0.221119	0.220207	0.145684	0.276682	-0.23728	0.0181703	0.107712	0.884447	-0.254051	0.290153	0.581054	0.131396	0.213693	0.555789	0.142635	0.266685
SwissProt	Q8WUH1		Protein Churchill OS=Homo sapiens OX=9606 GN=CHURC1 PE=1 SV=2	ENSG00000258289	CHURC1	0	-0.164295	-1.20065	0.293301	0.552603	0.0455055	0.221805	-1.03635	0.0455055	0.230817	-0.473228	-2.66235	2.13328	1.74148	0.240591	0.677728	-2.18912	0.240591	0.676548
SwissProt	Q8WUH1-2		Isoform 2 of Protein Churchill OS=Homo sapiens OX=9606 GN=CHURC1	ENSG00000258289	CHURC1	0.004		-1.71352	N.D.	0.0125147	N.D.	NA	3.93252	0.00014326	0.0212865	-4.41357	-4.75742	N.D.	0.584617	N.D.	NA	0.563309	0.629012	0.694443
SwissProt	Q14008		Cytoskeleton-associated protein 5 OS=Homo sapiens OX=9606 GN=CKAP5 PE=1 SV=3	ENSG00000175216	CKAP5	0	3.90338	3.14765	0.039082	0.0315505	1.28817e-05	0.0135168	-0.755729	1.28817e-05	0.0144083	3.7066	3.76257	0.139967	0.139353	0.649237	0.891842	0.0559738	0.649237	0.898358
SwissProt	Q14008-3		Isoform 3 of Cytoskeleton-associated protein 5 OS=Homo sapiens OX=9606 GN=CKAP5	ENSG00000175216	CKAP5	0	2.89671	2.62656	0.0180908	0.0345185	0.0102462	0.0577735	-0.266367	0.011979	0.0650093	3.34731	2.187	0.0361481	0.000292364	0.000484952	0.016828	-1.15835	0.000467099	0.0152878
SwissProt	O75122-3		Isoform 3 of CLIP-associating protein 2 OS=Homo sapiens OX=9606 GN=CLASP2	ENSG00000163539	CLASP2	0	2.25024	1.42961	0.417511	0.324067	0.0546971	0.23963	-0.820623	0.0546971	0.25019	1.75716	1.17235	0.445786	0.627395	0.258499	0.695716	-0.584807	0.258499	0.691754
SwissProt	O75122		CLIP-associating protein 2 OS=Homo sapiens OX=9606 GN=CLASP2 PE=1 SV=2	ENSG00000163539	CLASP2	0	-2.65817	-3.46775	0.169461	0.169766	0.0412	0.119858	-0.805802	0.0417859	0.127428	-4.1804	-4.5859	0.148043	0.532997	0.40879	0.480199	-0.403532	0.407562	0.494282
SwissProt	P30622-2		Isoform 3 of CAP-Gly domain-containing linker protein 1 OS=Homo sapiens OX=9606 GN=CLIP1	ENSG00000130779	CLIP1	0	0.324042	-0.151129	0.604728	0.550703	0.371226	0.623413	-0.47517	0.371226	0.617899	-0.824436	-2.36645	1.38157	2.73235	0.432268	0.807458	-1.54201	0.432268	0.813496
SwissProt	P30622		CAP-Gly domain-containing linker protein 1 OS=Homo sapiens OX=9606 GN=CLIP1 PE=1 SV=2	ENSG00000130779	CLIP1	0		-4.52619	N.D.	0.0933595	N.D.	NA	1.19867	0.00375344	0.0432401			N.D.	N.D.	N.D.	NA	0.0954259	0.0666433	0.132396
MAJIQ		ENSG00000132361:t:2599728-2599832_2599829-2600013_S1	clustered mitochondria homolog [Source:HGNC Symbol;Acc:HGNC:29094]	ENSG00000132361	CLUH	0	1.1823	-1.17962	0.177785	0.933396	0.012591	0.31199	-2.65085	0.173837	0.685016	-1.11903	-2.08015	0.600939	0.681923	0.14098	0.904948	1.22686	0.497812	0.98075
MAJIQ		ENSG00000132361:t:2599728-2599832_2599832-2600013_L1	clustered mitochondria homolog [Source:HGNC Symbol;Acc:HGNC:29094]	ENSG00000132361	CLUH	0	-0.311198	-2.26521	0.704554	0.194922	0.0354504	0.37173	-0.098378	0.936041	0.980815	-3.06483	-2.97783	1.43861	0.0968013	0.940508	0.989123	1.76363	0.355996	0.98075
SwissProt	P62633		Cellular nucleic acid-binding protein OS=Homo sapiens OX=9606 GN=CNBP PE=1 SV=1	ENSG00000169714	CNBP	0	2.70741	0.858916	0.222007	0.501818	0.00430021	0.0904965	-1.84849	0.00430021	0.0894357	1.98174	2.22964	0.944989	2.56916	0.882958	0.969065	0.247903	0.882958	0.969051
SwissProt	P62633-4		Isoform 4 of Cellular nucleic acid-binding protein OS=Homo sapiens OX=9606 GN=CNBP	ENSG00000169714	CNBP	0	-2.90344	-4.21639	0.352309	0.094219	0.0161516	0.147226	-1.88761	0.0365626	0.21352	-3.22335	-4.16865	0.57984	1.06777	0.385955	0.777525	-0.601311	0.708961	0.919263
SwissProt	P61923		Coatomer subunit zeta-1 OS=Homo sapiens OX=9606 GN=COPZ1 PE=1 SV=1	ENSG00000111481	COPZ1	0.001	-0.593061	-0.874423	0.480594	0.516498	0.527712	0.738629	-0.281362	0.527712	0.734331	-3.13053	-3.0937	1.16808	1.96303	0.979063	0.99425	0.0368228	0.979063	0.994594
SwissProt	P61923-4		Isoform 4 of Coatomer subunit zeta-1 OS=Homo sapiens OX=9606 GN=COPZ1	ENSG00000111481	COPZ1	0	1.13005	0.850655	0.121487	0.112585	0.139798	0.246469	-0.275618	0.138812	0.262803	-2.05858	-1.21423	0.0740424	0.0739371	0.00759154	0.0337963	0.846318	0.00723845	0.0359248
RefSeq		NM_003915.5_3	copine 1 (CPNE1), transcript variant 3, mRNA	ENSG00000214078	CPNE1	0	0.934816	0.796712	0.120185	0.398059	0.595918	0.773007	-0.138104	0.595918	0.771342	-1.45966	-0.73517	0.240279	0.398309	0.0542291	0.512654	0.724485	0.0542291	0.541385
RefSeq	O95819	NM_152928.2_1	copine 1 (CPNE1), transcript variant 5, mRNA	ENSG00000214078	CPNE1	0	2.56081	2.75195	0.143168	0.246275	0.309771	0.560274	0.191144	0.309771	0.558634	1.52738	1.88514	0.26231	0.2109	0.139425	0.651822	0.357764	0.139425	0.67913
SwissProt	Q8IUI8-2		Isoform 2 of Cytokine receptor-like factor 3 OS=Homo sapiens OX=9606 GN=CRLF3	ENSG00000176390	CRLF3	0	1.17504	0.738021	0.204996	0.654398	0.331612	0.592476	-0.43702	0.331612	0.587836	-0.980888	-0.442508	1.44353	1.1	0.634465	0.887018	0.53838	0.634465	0.892127
SwissProt	Q8IUI8		Cytokine receptor-like factor 3 OS=Homo sapiens OX=9606 GN=CRLF3 PE=1 SV=2	ENSG00000176390	CRLF3	0	-0.030776	0.393983	0.251926	0.0105899	0.140099	0.246764	0.428537	0.140313	0.264367	-3.0373	-0.797794	0.227577	0.0783988	0.00572643	0.0299026	2.24147	0.00573868	0.0318659
MAJIQ		ENSG00000165475:s:21063509-21063635_21006435-21063509_S1	crystallin lambda 1 [Source:HGNC Symbol;Acc:HGNC:18246]	ENSG00000165475	CRYL1	0	0.481377	1.29996	0.655931	0.194118	0.106904	0.509578	2.26605	0.0195063	0.1086		0.618836				NA	-0.0241456	0.891942	0.923664
MAJIQ		ENSG00000165475:s:21063509-21063635_21013893-21063509_L1	crystallin lambda 1 [Source:HGNC Symbol;Acc:HGNC:18246]	ENSG00000165475	CRYL1	0	-6.02515	1.62364		1.08862		NA	2.5883	0.0200726	0.1086						NA	0.0496697	0.941092	0.954143
MAJIQ		ENSG00000116791:s:75175782-75175931_75172678-75175782_S0	ENSG00000116791:s:75175782-75175931 OS=Homo sapiens GN=ENSG00000116791	ENSG00000116791	CRYZ	0	2.60703	2.66447	0.132001	0.0598568	0.631556	0.745521	-1.90041	0.194832	0.691044	-0.477869	0.771327	0.147694	0.161512	0.0150031	0.0571783	1.70419	0.131961	0.98075
MAJIQ		ENSG00000116791:s:75175782-75175931_75172888-75175782_L0	crystallin zeta [Source:HGNC Symbol;Acc:HGNC:2419]	ENSG00000116791	CRYZ	0	3.12716	3.49121	0.0870858	0.204411	0.046966	0.390037	-0.521655	0.215867	0.691044	0.482144	1.00039	0.43856	0.0773722	0.114064	0.904948	1.79225	0.104604	0.98075
SwissProt	P16989		Y-box-binding protein 3 OS=Homo sapiens OX=9606 GN=YBX3 PE=1 SV=4	ENSG00000060138	CSDA; YBX3	0	1.65118	-0.343637	0.78126	2.03946	0.188804	0.448229	-1.99482	0.188804	0.452012	1.37176	0.573195	1.08917	1.47934	0.493383	0.836256	-0.798563	0.493383	0.836622
SwissProt	P16989-2		Isoform 2 of Y-box-binding protein 3 OS=Homo sapiens OX=9606 GN=YBX3	ENSG00000060138	CSDA; YBX3	0		-3.53829	N.D.	N.D.	N.D.	NA	1.03222	0.287528	0.549014	-2.45105	-3.07179	1.47182	N.D.	N.D.	NA	-2.82351	0.112251	0.532958
SwissProt	Q96F07-2		Isoform 2 of Cytoplasmic FMR1-interacting protein 2 OS=Homo sapiens OX=9606 GN=CYFIP2	ENSG00000055163	CYFIP2	0	3.09988	3.35804	0.148494	0.170518	0.119145	0.356545	0.258152	0.119145	0.362029	1.88392	2.02207	0.0679651	0.198822	0.318361	0.737713	0.138149	0.318361	0.739667
SwissProt	Q96F07		Cytoplasmic FMR1-interacting protein 2 OS=Homo sapiens OX=9606 GN=CYFIP2 PE=1 SV=2	ENSG00000055163	CYFIP2	0	0.392104	1.07423	0.113106	0.0244558	0.0140863	0.0673652	0.685907	0.0132757	0.0680504	-1.1946	-0.579115	0.31984	0.0327259	0.113644	0.176189	0.617451	0.113403	0.193143
MAJIQ		ENSG00000129562:t:23035989-23036065_23036065-23043959_L2	defender against cell death 1 [Source:HGNC Symbol;Acc:HGNC:2664]	ENSG00000129562	DAD1	0	2.74431	2.64076	0.494781	0.552651	0.820849	0.918798	-1.42701	0.387761	0.716956	0.921175	1.3656	0.955035	0.358346	0.492463	0.983961	-1.01329	0.423158	0.98075
MAJIQ		ENSG00000129562:t:23035989-23036065_23036065-23057853_S1	defender against cell death 1 [Source:HGNC Symbol;Acc:HGNC:2664]	ENSG00000129562	DAD1	0	2.08847	2.85668	0.372778	0.660381	0.154181	0.559058	-0.832549	0.143159	0.650567	0.0659477	1.36887	0.492136	0.837582	0.0808688	0.904948	-0.426624	0.242336	0.98075
SwissProt	Q16643-2		Isoform 2 of Drebrin OS=Homo sapiens OX=9606 GN=DBN1	ENSG00000113758	DBN1	0			N.D.	N.D.	N.D.	NA	0.314679	0.120136	0.362888	-3.39551	-2.20019	1.1736	1.23736	0.353358	0.755128	-0.234246	0.894647	0.970211
SwissProt	Q16643-3		Isoform 3 of Drebrin OS=Homo sapiens OX=9606 GN=DBN1	ENSG00000113758	DBN1	0	1.75999	2.29645	0.0980236	0.132766	0.0048954	0.0952617	0.536464	0.0048954	0.0937052	5.05271	5.58816	0.52457	0.251127	0.186021	0.627529	0.535442	0.186021	0.627129
SwissProt	Q9UJU6		Drebrin-like protein OS=Homo sapiens OX=9606 GN=DBNL PE=1 SV=1	ENSG00000136279	DBNL	0	2.72804	2.33938	0.139536	0.430198	0.210848	0.473615	-0.388665	0.210848	0.476488	0.710534	1.08502	1.1936	0.909049	0.687792	0.90878	0.374491	0.687792	0.915039
SwissProt	Q9UJU6-2		Isoform 2 of Drebrin-like protein OS=Homo sapiens OX=9606 GN=DBNL	ENSG00000136279	DBNL	0	-2.72314	-2.58817	0.200036	0.733698	0.825253	0.875751	0.138745	0.821024	0.877864			N.D.	N.D.	N.D.	NA	0.155514	0.291868	0.391306
RefSeq		NM_001348065.1_1	Homo sapiens dynactin subunit 2 (DCTN2), transcript variant 4, mRNA	ENSG00000175203	DCTN2	0	3.18323	3.38475	0.0566931	0.0938834	0.121652	0.222908	0.201521	0.121652	0.236553	-0.694849	0.876256	0.378468	0.13283	0.0310774	0.0657298	1.57111	0.0310774	0.0731677
RefSeq		NM_006400.4_1	dynactin subunit 2 (DCTN2), transcript variant 1, mRNA	ENSG00000175203	DCTN2	0	2.51584	2.79561	0.331286	0.290113	0.332913	0.584524	0.279778	0.332913	0.582908	0.209544	0.0262477	0.526385	0.900635	0.776047	0.967992	-0.183296	0.776047	0.968168
SwissProt	Q9UJW0		Dynactin subunit 4 OS=Homo sapiens OX=9606 GN=DCTN4 PE=1 SV=1	ENSG00000132912	DCTN4	0	0.213468	0.180077	0.437143	0.426598	0.929118	0.96776	-0.0333908	0.929118	0.967698	-1.60904	-1.4595	0.444718	0.274283	0.646108	0.891	0.149534	0.646108	0.898144
SwissProt	Q9UJW0-3		Isoform 3 of Dynactin subunit 4 OS=Homo sapiens OX=9606 GN=DCTN4	ENSG00000132912	DCTN4	0	-1.0032	-0.920634	0.00457682	0.0766692	0.267823	0.380847	0.086341	0.24545	0.37852	-1.1677	-2.19615	0.201974	0.119698	0.0250809	0.0644484	-1.02648	0.0245436	0.0708717
RefSeq	O43390	NM_001302552.2_3	DEAD-box helicase 3, Y-linked (DDX3Y), transcript variant 3, mRNA	ENSG00000067048	DDX3Y	0	4.37756	4.2165	0.209162	0.267613	0.457594	0.680208	-0.161061	0.457594	0.675319	6.45121	6.1998	0.285228	0.29312	0.347022	0.818257	-0.251405	0.347022	0.813181
RefSeq	Q05193	NM_004660.4_1	Homo sapiens DEAD-box helicase 3, Y-linked (DDX3Y), transcript variant 2, mRNA	ENSG00000067048	DDX3Y	0	3.19808	3.35572	0.124612	0.0433064	0.233116	0.337941	0.157637	0.233116	0.355442	5.37101	5.25592	0.0706121	0.071966	0.247828	0.31135	-0.115083	0.247828	0.325878
SwissProt	Q86XP3		ATP-dependent RNA helicase DDX42 OS=Homo sapiens OX=9606 GN=DDX42 PE=1 SV=1	ENSG00000198231	DDX42	0	2.82498	2.46576	0.226633	0.125455	0.074206	0.280356	-0.359215	0.074206	0.291526	3.5902	3.01667	0.117947	0.336204	0.0494063	0.420376	-0.573535	0.0494063	0.430409
SwissProt	Q86XP3-2		Isoform 2 of ATP-dependent RNA helicase DDX42 OS=Homo sapiens OX=9606 GN=DDX42	ENSG00000198231	DDX42	0	2.12735	2.15773	0.190001	0.116075	0.8648	0.906561	0.0341589	0.850334	0.898943	2.48157	1.3384	0.0721201	0.286395	0.0317891	0.0736454	-1.1412	0.0328129	0.084564
SwissProt	Q7L2E3-2		Isoform 2 of Putative ATP-dependent RNA helicase DHX30 OS=Homo sapiens OX=9606 GN=DHX30	ENSG00000132153	DHX30	0	3.01995	3.07556	0.100587	0.151932	0.624998	0.798518	0.0556179	0.624998	0.796575	4.70605	4.1283	0.55114	0.42219	0.22292	0.667758	-0.577756	0.22292	0.667399
SwissProt	Q7L2E3		Putative ATP-dependent RNA helicase DHX30 OS=Homo sapiens OX=9606 GN=DHX30 PE=1 SV=1	ENSG00000132153	DHX30	0	1.12765	1.26384	0.0452319	0.0580461	0.120221	0.223736	0.139966	0.122324	0.242293	4.57961	4.23084	0.105481	0.0541127	0.0532008	0.102307	-0.346806	0.0529472	0.11362
SwissProt	Q9NXW2		DnaJ homolog subfamily B member 12 OS=Homo sapiens OX=9606 GN=DNAJB12 PE=1 SV=4	ENSG00000148719	DNAJB12	0	0.529052	-0.268942	0.310536	0.376377	0.0472196	0.223026	-0.797994	0.0472196	0.232602	-1.38527	-0.738687	0.966384	0.155012	0.316344	0.735919	0.64658	0.316344	0.737538
SwissProt	Q9NXW2-2		Isoform 2 of DnaJ homolog subfamily B member 12 OS=Homo sapiens OX=9606 GN=DNAJB12	ENSG00000148719	DNAJB12	0	-1.6691	-2.59045	0.0290737	0.444743	0.0997937	0.200076	-0.917574	0.0998193	0.214846	-4.38317	-2.53689	N.D.	0.102902	N.D.	NA	2.88583	0.108899	0.187698
RefSeq		NM_001288739.1_2	Homo sapiens dynamin 1 (DNM1), transcript variant 5, mRNA	ENSG00000106976	DNM1	0	1.01006	1.06417	0.0304855	0.0186813	0.165692	0.269337	0.0541085	0.165692	0.284679	-1.7053	-1.22705	0.57437	0.0958331	0.365319	0.426614	0.478252	0.365319	0.435798
RefSeq		NM_004408.3_2	dynamin 1 (DNM1), transcript variant 1, mRNA	ENSG00000106976	DNM1	0	2.58693	3.03861	0.137315	0.342949	0.101601	0.36322	0.451677	0.101601	0.374895	0.605705	1.38227	0.528442	0.612408	0.171679	0.682161	0.776561	0.171679	0.706881
SwissProt	O00429		Dynamin-1-like protein OS=Homo sapiens OX=9606 GN=DNM1L PE=1 SV=2	ENSG00000087470	DNM1L	0	2.66811	2.67936	0.176821	0.289697	0.957007	0.981311	0.0112405	0.957007	0.980949	-0.302315	0.61601	0.320597	0.625578	0.0864173	0.485872	0.918325	0.0864173	0.48973
SwissProt	O00429-2		Isoform 4 of Dynamin-1-like protein OS=Homo sapiens OX=9606 GN=DNM1L	ENSG00000087470	DNM1L	0	-3.07188	-3.78408	0.0258331	N.D.	N.D.	NA	-1.6442	0.221409	0.35166			N.D.	N.D.	N.D.	NA	0.256832	0.123734	0.205342
MAJIQ		ENSG00000079805:t:10909063-10909248_10906875-10909162_S1	dynamin 2 [Source:HGNC Symbol;Acc:HGNC:2974]	ENSG00000079805	DNM2	0	-1.17015	-0.665624	0.741655	0.907248	0.604546	0.833248	-0.0663379	0.898468	0.961489	-4.07129	-1.68614		0.614666		NA	0.186706	0.782982	0.988727
MAJIQ		ENSG00000079805:t:10909063-10909248_10908194-10909162_L1	dynamin 2 [Source:HGNC Symbol;Acc:HGNC:2974]	ENSG00000079805	DNM2	0.005	-1.40168	-2.75249		0.384751		NA	0.168897	0.94655	0.984098	-4.07488					NA	1.49952	0.326646	0.98075
SwissProt	P26358-2		Isoform 2 of DNA (cytosine-5)-methyltransferase 1 OS=Homo sapiens OX=9606 GN=DNMT1	ENSG00000130816	DNMT1	0	4.05046	2.37919	0.0839451	0.27788	0.000568109	0.0410231	-1.67128	0.000568109	0.0401348	5.22312	3.70081	0.0345061	0.186684	0.000155823	0.0481076	-1.52232	0.000155823	0.04696
SwissProt	P26358		DNA (cytosine-5)-methyltransferase 1 OS=Homo sapiens OX=9606 GN=DNMT1 PE=1 SV=2	ENSG00000130816	DNMT1	0	-2.50636	-3.73523	0.471744	0.195885	0.0765942	0.169631	-1.2251	0.0778101	0.183182	0.0528117	-2.42278	0.56085	0.0614136	0.0250007	0.0643371	-2.47363	0.0249126	0.0716133
SwissProt	Q9UBC3-3		Isoform 3 of DNA (cytosine-5)-methyltransferase 3B OS=Homo sapiens OX=9606 GN=DNMT3B	ENSG00000088305	DNMT3B	0.002	-7.68651	-6.14746	0.675068	0.0540123	0.0552603	0.240736	1.63334	0.0152596	0.14928	-2.76943	-2.60427	0.138597	0.49584	0.59803	0.876317	-1.14385	0.437301	0.815188
SwissProt	Q9UBC3		DNA (cytosine-5)-methyltransferase 3B OS=Homo sapiens OX=9606 GN=DNMT3B PE=1 SV=1	ENSG00000088305	DNMT3B	0.001			N.D.	N.D.	N.D.	NA	-0.0310535	0.650311	0.744669	-3.75577	-3.83221	0.152806	0.0348188	0.561599	0.627261	-0.074478	0.566462	0.639143
SwissProt	Q96BY6-3		Isoform 3 of Dedicator of cytokinesis protein 10 OS=Homo sapiens OX=9606 GN=DOCK10	ENSG00000135905	DOCK10	0	0.404089	2.44767	0.172649	0.239192	0.000276526	0.0347406	2.04358	0.000276526	0.0320945	1.81156	1.40846	0.50472	0.0145956	0.238929	0.675924	-0.403096	0.238929	0.675516
SwissProt	Q96BY6		Dedicator of cytokinesis protein 10 OS=Homo sapiens OX=9606 GN=DOCK10 PE=1 SV=3	ENSG00000135905	DOCK10	0	-1.9089	0.162574	0.32866	0.11972	0.0139588	0.0673652	2.07525	0.0137662	0.0694654		-2.77193	N.D.	0.646475	N.D.	NA	3.5646	0.0170922	0.0563937
SwissProt	Q92784		Zinc finger protein DPF3 OS=Homo sapiens OX=9606 GN=DPF3 PE=1 SV=3	ENSG00000205683	DPF3	0	-3.90368	-2.59448	0.340145	0.942777	0.0864425	0.302937	1.3092	0.0864425	0.312303	-3.81486	0.665852	2.18994	0.429279	0.0254058	0.324328	4.48071	0.0254058	0.334241
SwissProt	Q92784-3		Isoform 3 of Zinc finger protein DPF3 OS=Homo sapiens OX=9606 GN=DPF3	ENSG00000205683	DPF3	0	-4.19377	-1.32278	N.D.	0.408665	N.D.	NA	3.57448	0.0421736	0.128066	-1.74999	0.941663	N.D.	0.157162	N.D.	NA	4.98065	0.161551	0.251307
SwissProt	Q08554		Desmocollin-1 OS=Homo sapiens OX=9606 GN=DSC1 PE=1 SV=2	ENSG00000134765	DSC1	0.002	-1.88341	-2.31163	0.942094	0.546721	0.612058	0.791165	-1.71396	0.292096	0.553288	-2.75311	-1.05242	1.11453	0.771005	0.163198	0.601035	-0.131227	0.95001	0.985207
SwissProt	Q08554-2		Isoform 1B of Desmocollin-1 OS=Homo sapiens OX=9606 GN=DSC1	ENSG00000134765	DSC1	0	1.31685	0.8704	0.0819138	0.0917224	0.0359057	0.111501	-0.442673	0.0348795	0.115346		-0.223318	N.D.	0.19391	N.D.	NA	6.12315	0.000838879	0.0173785
SwissProt	O75530		Polycomb protein EED OS=Homo sapiens OX=9606 GN=EED PE=1 SV=2	ENSG00000074266	EED	0	-0.210953	-0.961583	0.143306	0.43405	0.0466627	0.222918	-0.75063	0.0466627	0.232214	3.53188	3.12527	0.309542	0.513195	0.305131	0.722122	-0.406604	0.305131	0.723078
SwissProt	O75530-2		Isoform 2 of Polycomb protein EED OS=Homo sapiens OX=9606 GN=EED	ENSG00000074266	EED	0	-0.929496	-1.7481	0.117262	0.375463	0.0986569	0.198961	-0.814826	0.100436	0.215635	2.70821	2.54793	0.0268698	0.00568796	0.0143665	0.0468968	-0.158311	0.0152151	0.0530866
SwissProt	P29692-2		Isoform 2 of Elongation factor 1-delta OS=Homo sapiens OX=9606 GN=EEF1D	ENSG00000104529	EEF1D	0	5.59718	4.83792	0.378849	0.154345	0.0324435	0.196508	-0.759261	0.0324435	0.203339	2.66669	3.51402	0.41277	0.25644	0.039158	0.387609	0.847327	0.039158	0.398028
SwissProt	P29692-3		Isoform 3 of Elongation factor 1-delta OS=Homo sapiens OX=9606 GN=EEF1D	ENSG00000104529	EEF1D	0	-2.82744	-4.85898	0.953278	2.02957	0.19167	0.450009	-2.03154	0.19167	0.453546		-6.10025	N.D.	N.D.	N.D.	NA	0.356406	0.172025	0.613137
RefSeq	Q9UI10	NM_001034116.1_2	eukaryotic translation initiation factor 2B subunit delta (EIF2B4), transcript variant 2, mRNA	ENSG00000115211	EIF2B4	0	0.168901	-1.11503	0.162441	0.99455	0.0919549	0.344635	-1.28393	0.0919549	0.359252	-0.979263	-1.85595	0.396096	0.829442	0.173878	0.684356	-0.876686	0.173878	0.706881
RefSeq		NM_015636.3_2	Homo sapiens eukaryotic translation initiation factor 2B subunit delta (EIF2B4), transcript variant 3, mRNA	ENSG00000115211	EIF2B4	0	-0.310083	-0.850529	0.179902	0.0907407	0.0630018	0.146848	-0.540447	0.0630018	0.156355	0.531088	-0.836544	0.068285	0.21774	0.0136363	0.0418061	-1.36763	0.0136363	0.0459877
SwissProt	Q04637-8		Isoform 8 of Eukaryotic translation initiation factor 4 gamma 1 OS=Homo sapiens OX=9606 GN=EIF4G1	ENSG00000114867	EIF4G1	0	-0.1618	-0.819191	0.376969	1.33161	0.448509	0.681666	-2.42015	0.262544	0.526382	1.6786	1.56291	1.55346	0.773665	0.930855	0.982205	-2.7876	0.3813	0.7798
SwissProt	Q04637-9		Isoform 9 of Eukaryotic translation initiation factor 4 gamma 1 OS=Homo sapiens OX=9606 GN=EIF4G1	ENSG00000114867	EIF4G1	0	5.42022	4.66408	0.189114	0.0434102	0.00251175	0.0767917	-0.756139	0.00251175	0.0784724	5.68183	5.08779	0.658429	1.02404	0.445624	0.81384	-0.594041	0.445624	0.818255
MAJIQ		ENSG00000106682:t:73609071-73609208_73604248-73609071_S0	eukaryotic translation initiation factor 4H [Source:HGNC Symbol;Acc:HGNC:12741]	ENSG00000106682	EIF4H	0	5.52443	4.81417	0.374018	0.161603	0.0391869	0.38172	-0.80338	0.192486	0.691044	2.68917	2.74823	1.06002	0.713506	0.940039	0.989123	-0.505382	0.238327	0.98075
MAJIQ		ENSG00000106682:t:73609071-73609208_73604636-73609071_L2	eukaryotic translation initiation factor 4H [Source:HGNC Symbol;Acc:HGNC:12741]	ENSG00000106682	EIF4H	0.001	1.36915	0.571937	0.706978	0.138419	0.230922	0.603097	-0.294435	0.655682	0.85527	-2.04239	-1.64465	1.35055	0.716895	0.736016	0.983961	-0.452509	0.338398	0.98075
SwissProt	P06733		Alpha-enolase OS=Homo sapiens OX=9606 GN=ENO1 PE=1 SV=2	ENSG00000074800	ENO1	0	9.27702	9.1238	0.299698	0.408323	0.628002	0.799697	-0.153219	0.628002	0.797714	6.24224	6.38068	0.270868	0.459641	0.676388	0.904706	0.138441	0.676388	0.910027
SwissProt	P06733-2		Isoform MBP-1 of Alpha-enolase OS=Homo sapiens OX=9606 GN=ENO1	ENSG00000074800	ENO1	0	-3.12191	-2.82923	0.828917	2.10803	0.871854	0.938781	0.310916	0.868182	0.93478	-4.93325	-4.53158	1.66003	N.D.	N.D.	NA	-0.314203	0.795391	0.943724
MAJIQ		ENSG00000225784:s:51361723-51361910_51352122-51361727_S1		ENSG00000225784	ENSG00000225784	0	-2.06272	-2.85641				NA	-0.00336505	0.99155	0.994573	-2.36274	-2.75839				NA	3.27752	0.0159937	0.0664437
MAJIQ		ENSG00000225784:s:51361723-51361910_51352368-51361723_L1		ENSG00000225784	ENSG00000225784	0	-1.1179	-0.831893	0.201232	2.18089	0.821033	0.918798	1.60042	0.0809875	0.221119	-3.19976	-1.50023	2.64929			NA	0.939588	0.0199872	0.0727729
SwissProt	O43491		Band 4.1-like protein 2 OS=Homo sapiens OX=9606 GN=EPB41L2 PE=1 SV=1	ENSG00000079819	EPB41L2	0	2.41871	1.96375	0.386269	0.203572	0.145433	0.394397	-0.454955	0.145433	0.399672	2.27593	1.62503	0.563887	0.323045	0.157794	0.590399	-0.650899	0.157794	0.590411
SwissProt	O43491-4		Isoform 4 of Band 4.1-like protein 2 OS=Homo sapiens OX=9606 GN=EPB41L2	ENSG00000079819	EPB41L2	0	-1.88799	-1.47808	0.756695	0.125987	0.522588	0.735048	-1.07043	0.526365	0.73356	-3.66703	-4.05157	0.824104	0.665582	0.624496	0.883268	-1.17702	0.288907	0.708168
SwissProt	Q9BSJ8		Extended synaptotagmin-1 OS=Homo sapiens OX=9606 GN=ESYT1 PE=1 SV=1	ENSG00000139641	ESYT1	0	2.18365	2.5561	0.293734	0.0328394	0.0944697	0.317942	0.372447	0.0944697	0.327006	0.202193	0.970867	0.574951	0.401899	0.130551	0.551408	0.768674	0.130551	0.554112
SwissProt	Q9BSJ8-2		Isoform 2 of Extended synaptotagmin-1 OS=Homo sapiens OX=9606 GN=ESYT1	ENSG00000139641	ESYT1	0	0.699951	2.24204	0.0443037	0.0943207	0.00227545	0.0370818	1.54586	0.00237609	0.0372704	0.498075	0.360793	0.0344831	0.12631	0.276356	0.353526	-0.135315	0.291663	0.391154
SwissProt	A0FGR8-2		Isoform 2 of Extended synaptotagmin-2 OS=Homo sapiens OX=9606 GN=ESYT2	ENSG00000117868	ESYT2	0	2.37388	3.25022	0.487467	0.224466	0.0474266	0.223026	0.876331	0.0474266	0.232726	1.57679	2.0449	0.215817	0.0829306	0.024743	0.320984	0.468106	0.024743	0.330873
SwissProt	A0FGR8-6		Isoform 6 of Extended synaptotagmin-2 OS=Homo sapiens OX=9606 GN=ESYT2	ENSG00000117868	ESYT2	0		-2.86113	N.D.	1.21696	N.D.	NA	2.38336	0.107387	0.347094	-5.57562	-3.51893	N.D.	N.D.	N.D.	NA	0.718711	0.545866	0.857139
SwissProt	P38117		Electron transfer flavoprotein subunit beta OS=Homo sapiens OX=9606 GN=ETFB PE=1 SV=3	ENSG00000105379	ETFB	0	3.00223	2.90564	0.135236	0.357351	0.684097	0.828894	-0.0965893	0.684097	0.826368	0.706207	1.29804	0.184969	0.0654167	0.00640631	0.201193	0.591836	0.00640631	0.207718
SwissProt	P38117-2		Isoform 2 of Electron transfer flavoprotein subunit beta OS=Homo sapiens OX=9606 GN=ETFB	ENSG00000105379	ETFB	0	3.62005	3.2327	0.00270921	0.0179201	0.0010928	0.0323692	-0.383576	0.0009035	0.031454	0.268168	1.67508	0.461993	0.210404	0.0593599	0.109983	1.40888	0.0590316	0.12194
SwissProt	Q9NV70-2		Isoform 2 of Exocyst complex component 1 OS=Homo sapiens OX=9606 GN=EXOC1	ENSG00000090989	EXOC1	0	0.784793	1.0087	0.700329	0.452509	0.666032	0.820799	0.223911	0.666032	0.81868	-1.04305	-0.587713	0.790648	1.61552	0.683675	0.907532	0.455341	0.683675	0.912975
SwissProt	Q9NV70		Exocyst complex component 1 OS=Homo sapiens OX=9606 GN=EXOC1 PE=1 SV=4	ENSG00000090989	EXOC1	0.001	-1.89739	-1.85215	0.399503	0.0505487	0.888374	0.922177	0.0490105	0.879986	0.920972	-3.44412		N.D.	N.D.	N.D.	NA	-1.17733	0.517185	0.596507
SwissProt	P16930		Fumarylacetoacetase OS=Homo sapiens OX=9606 GN=FAH PE=1 SV=2	ENSG00000103876	FAH	0	2.32497	2.07006	0.171689	0.0852224	0.0826261	0.29686	-0.254909	0.0826261	0.306425	-1.06107	-0.779255	1.04313	0.811609	0.730614	0.921746	0.281813	0.730614	0.926698
SwissProt	P16930-2		Isoform 2 of Fumarylacetoacetase OS=Homo sapiens OX=9606 GN=FAH	ENSG00000103876	FAH	0	-4.24728	-3.44913	1.37793	0.557835	0.405031	0.649293	0.798158	0.405031	0.643802			N.D.	N.D.	N.D.	NA	0.213562	0.135362	0.559897
RefSeq	Q49A26	NM_001329752.1_1	Homo sapiens family with sequence similarity 136 member A (FAM136A), transcript variant 2, mRNA	ENSG00000035141	FAM136A	0	1.94292	1.14081	0.122268	0.199565	0.0400304	0.114235	-0.802106	0.0400304	0.121245	-1.01886	-1.618	0.120524	0.244048	0.0895489	0.137783	-0.599136	0.0895489	0.151325
RefSeq	Q9BRT3	NM_032822.2_2	family with sequence similarity 136 member A (FAM136A), transcript variant 1, mRNA	ENSG00000035141	FAM136A	0	0.504537	0.384533	0.0951565	0.353408	0.600454	0.775593	-0.120004	0.600454	0.774189	-2.92107	-3.57319	1.55933	1.71043	0.65109	0.940067	-0.652117	0.65109	0.936166
SwissProt	Q9BXW9-1		Isoform 1 of Fanconi anemia group D2 protein OS=Homo sapiens OX=9606 GN=FANCD2	ENSG00000144554	FANCD2	0	1.16003	-0.558703	0.258437	0.64529	0.012821	0.136231	-1.71873	0.012821	0.13741	1.46601	1.15219	0.426592	0.412038	0.411279	0.794193	-0.313816	0.411279	0.801987
SwissProt	Q9BXW9		Fanconi anemia group D2 protein OS=Homo sapiens OX=9606 GN=FANCD2 PE=1 SV=2	ENSG00000144554	FANCD2	0	0.00185715	-2.40011	0.180139	0.361342	0.0138351	0.067106	-2.39819	0.0138987	0.0696547	-1.04337	-3.69363	0.0721423	1.42189	0.119065	0.181902	-2.64829	0.118606	0.199639
SwissProt	P14324-2		Isoform 2 of Farnesyl pyrophosphate synthase OS=Homo sapiens OX=9606 GN=FDPS	ENSG00000160752	FDPS	0	3.92482	3.96493	0.299136	0.210514	0.858642	0.932151	0.0401022	0.858642	0.931247	1.14341	1.16536	0.311228	0.273009	0.931219	0.982366	0.021959	0.931219	0.981403
SwissProt	P14324		Farnesyl pyrophosphate synthase OS=Homo sapiens OX=9606 GN=FDPS PE=1 SV=4	ENSG00000160752	FDPS	0	4.468	4.42083	0.128025	0.0946694	0.715971	0.788317	-0.0433897	0.732385	0.810855	1.51984	2.34613	0.121275	0.111627	0.0193212	0.0548347	0.828255	0.0184094	0.0590778
SwissProt	Q6UN15		Pre-mRNA 3'-end-processing factor FIP1 OS=Homo sapiens OX=9606 GN=FIP1L1 PE=1 SV=1	ENSG00000145216	FIP1L1	0	0.352371	0.660103	0.623332	0.405179	0.513045	0.728458	0.307732	0.513045	0.723859	2.57217	2.50526	0.516878	0.830912	0.911447	0.975231	-0.0669014	0.911447	0.97481
SwissProt	Q6UN15-3		Isoform 3 of Pre-mRNA 3'-end-processing factor FIP1 OS=Homo sapiens OX=9606 GN=FIP1L1	ENSG00000145216	FIP1L1	0	-1.52938		0.535154	N.D.	N.D.	NA	-4.43511	0.000143302	0.0262191	0.395967	0.469508	1.12874	0.142614	0.935495	0.983663	0.23506	0.947648	0.985188
SwissProt	Q06787		Synaptic functional regulator FMR1 OS=Homo sapiens OX=9606 GN=FMR1 PE=1 SV=1	ENSG00000102081	FMR1	0	0.344362	0.254005	0.0851487	0.244951	0.578731	0.770048	-0.0903571	0.578731	0.767376	2.16525	2.22798	0.389938	0.679596	0.896415	0.972482	0.0627276	0.896415	0.97101
SwissProt	Q06787-7		Isoform 7 of Synaptic functional regulator FMR1 OS=Homo sapiens OX=9606 GN=FMR1	ENSG00000102081	FMR1	0	-4.73765	-3.90544	N.D.	0.223272	N.D.	NA	1.34323	0.126434	0.247119	-0.924247	-0.384431	0.0878477	0.0133023	0.013276	0.0449172	0.541784	0.0127285	0.0478765
SwissProt	Q96AE4		Far upstream element-binding protein 1 OS=Homo sapiens OX=9606 GN=FUBP1 PE=1 SV=3	ENSG00000162613	FUBP1	0	4.80663	4.70604	0.254828	0.0524937	0.539737	0.74454	-0.100595	0.539737	0.740513	4.04554	3.71467	0.58633	0.455191	0.483157	0.831589	-0.330874	0.483157	0.833616
SwissProt	Q96AE4-2		Isoform 2 of Far upstream element-binding protein 1 OS=Homo sapiens OX=9606 GN=FUBP1	ENSG00000162613	FUBP1	0	-2.52446	-1.68659	0.769288	0.188185	0.140828	0.389143	0.837874	0.140828	0.394026	-1.12069	-2.03901	0.561882	1.06597	0.281326	0.709002	-2.37341	0.201175	0.64555
SwissProt	Q9UN86		Ras GTPase-activating protein-binding protein 2 OS=Homo sapiens OX=9606 GN=G3BP2 PE=1 SV=2	ENSG00000138757	G3BP2	0	3.20157	2.29737	0.471212	0.40883	0.0660274	0.2622	-0.904198	0.0660274	0.27362	4.04734	3.5756	0.383643	0.431656	0.230023	0.667758	-0.471745	0.230023	0.667399
SwissProt	Q9UN86-2		Isoform B of Ras GTPase-activating protein-binding protein 2 OS=Homo sapiens OX=9606 GN=G3BP2	ENSG00000138757	G3BP2	0	-4.05361	-5.28166	0.794137	N.D.	N.D.	NA	-1.747	0.0294867	0.193279	-2.79919	-2.74113	0.760263	0.612723	0.92293	0.980131	0.0580581	0.92293	0.979932
RefSeq	Q14353	NM_000156.5_1	guanidinoacetate N-methyltransferase (GAMT), transcript variant 1, mRNA	ENSG00000130005	GAMT	0	-0.423922	-0.813466	0.635332	0.168309	0.362645	0.609487	-0.389544	0.362645	0.607773	-2.61713	-3.19014	1.21923	2.04145	0.697825	0.949013	-0.573004	0.697825	0.943199
RefSeq		NM_138924.2_1	Homo sapiens guanidinoacetate N-methyltransferase (GAMT), transcript variant 2, mRNA	ENSG00000130005	GAMT	0	-0.334857	-1.33433	0.444548	0.494853	0.167524	0.271456	-0.999476	0.167524	0.286474	-3.4208	-3.61865	0.0799121	0.161864	0.261273	0.325888	-0.197851	0.261273	0.340406
SwissProt	Q14697		Neutral alpha-glucosidase AB OS=Homo sapiens OX=9606 GN=GANAB PE=1 SV=3	ENSG00000089597	GANAB	0	-1.76279	-1.51934	0.59965	0.00973641	0.623865	0.797843	-1.26495	0.459617	0.684656	-3.9976	-3.55131	0.659926	0.634248	0.561732	0.862393	0.390674	0.79165	0.943162
SwissProt	Q14697-2		Isoform 2 of Neutral alpha-glucosidase AB OS=Homo sapiens OX=9606 GN=GANAB	ENSG00000089597	GANAB	0	5.90278	5.87484	0.0821904	0.279044	0.87591	0.940874	-0.0279477	0.87591	0.939135	4.21478	4.36304	0.584817	0.405558	0.736475	0.921826	0.148261	0.736475	0.928386
SwissProt	Q96RP9		Elongation factor G, mitochondrial OS=Homo sapiens OX=9606 GN=GFM1 PE=1 SV=2	ENSG00000168827	GFM1	0	-3.2093	-4.06048	1.10669	1.18625	0.535397	0.742602	-0.456605	0.758044	0.873277	-3.06088		N.D.	N.D.	N.D.	NA	-0.902137	0.513103	0.840354
SwissProt	Q96RP9-2		Isoform 2 of Elongation factor G, mitochondrial OS=Homo sapiens OX=9606 GN=GFM1	ENSG00000168827	GFM1	0	2.83215	2.64318	0.238612	0.179544	0.334615	0.594513	-0.188967	0.334615	0.589691	1.65644	1.81891	0.487629	0.0765543	0.599086	0.876317	0.162476	0.599086	0.879045
SwissProt	Q6Y7W6		GRB10-interacting GYF protein 2 OS=Homo sapiens OX=9606 GN=GIGYF2 PE=1 SV=1	ENSG00000204120	GIGYF2	0	2.31518	2.54944	0.227894	0.581558	0.551374	0.750927	0.234257	0.551374	0.747454	1.60993	1.54471	0.153312	0.305518	0.757617	0.92828	-0.0652232	0.757617	0.933374
SwissProt	Q6Y7W6-3		Isoform 2 of GRB10-interacting GYF protein 2 OS=Homo sapiens OX=9606 GN=GIGYF2	ENSG00000204120	GIGYF2	0	-0.925837	-0.195386	0.327773	0.848548	0.37388	0.486401	0.734228	0.370907	0.504336	-0.209004	0.167028	0.0878423	0.320339	0.250529	0.326271	0.378	0.244435	0.343645
SwissProt	Q9BRX5-3		Isoform 3 of DNA replication complex GINS protein PSF3 OS=Homo sapiens OX=9606 GN=GINS3	ENSG00000181938	GINS3	0	-0.0744906	-1.07809	0.039646	0.920088	0.13213	0.376196	-1.0036	0.13213	0.382	-1.78478	-4.07657	0.658339	0.673609	0.0135384	0.255633	-2.29179	0.0135384	0.267055
SwissProt	Q9BRX5		DNA replication complex GINS protein PSF3 OS=Homo sapiens OX=9606 GN=GINS3 PE=1 SV=1	ENSG00000181938	GINS3	0	-0.72996	-1.2057	0.0780534	0.102224	0.0346555	0.109386	-0.471965	0.0337348	0.11392	-2.73318	-3.05583	0.0859688	0.221187	0.194431	0.266686	-0.320676	0.200557	0.295554
SwissProt	O94925		Glutaminase kidney isoform, mitochondrial OS=Homo sapiens OX=9606 GN=GLS PE=1 SV=1	ENSG00000115419	GLS	0	2.51152	2.92693	0.373419	0.226886	0.174964	0.434788	0.415412	0.174964	0.439168	0.231216	1.1473	0.476744	0.485663	0.0801221	0.473801	0.916081	0.0801221	0.482333
SwissProt	O94925-3		Isoform 3 of Glutaminase kidney isoform, mitochondrial OS=Homo sapiens OX=9606 GN=GLS	ENSG00000115419	GLS	0	-0.981779	-0.226467	0.602371	1.17417	0.377636	0.628387	0.755311	0.377636	0.622236	-3.79103	-2.54229	0.407507	0.656323	0.0488272	0.418725	1.24874	0.0488272	0.428325
SwissProt	Q49A26-2		Isoform 2 of Putative oxidoreductase GLYR1 OS=Homo sapiens OX=9606 GN=GLYR1	ENSG00000140632	GLYR1	0	-0.904512	-0.438311	0.573068	0.337046	0.291329	0.553487	0.466201	0.291329	0.552835	3.51294	3.67238	0.144026	0.273416	0.422012	0.802315	0.159446	0.422012	0.809512
SwissProt	Q49A26		Putative oxidoreductase GLYR1 OS=Homo sapiens OX=9606 GN=GLYR1 PE=1 SV=3	ENSG00000140632	GLYR1	0	-0.749425	-0.821205	0.0707869	0.482293	0.854318	0.898473	-0.0680027	0.862377	0.907888	2.92158	3.23752	0.0778758	0.098452	0.0706682	0.123403	0.317902	0.0726973	0.140158
SwissProt	Q96IJ6		Mannose-1-phosphate guanyltransferase alpha OS=Homo sapiens OX=9606 GN=GMPPA PE=1 SV=1	ENSG00000144591	GMPPA	0	0.754134	-0.0259835	0.183569	0.6307	0.108819	0.342142	-0.780117	0.108819	0.349079	0.218761	-0.107587	1.03385	0.921584	0.70408	0.911914	-0.326348	0.70408	0.918853
SwissProt	Q96IJ6-2		Isoform 2 of Mannose-1-phosphate guanyltransferase alpha OS=Homo sapiens OX=9606 GN=GMPPA	ENSG00000144591	GMPPA	0.003	-0.977007	-1.40002	0.0205544	0.0475492	0.00741494	0.0525906	-0.419231	0.00770571	0.0546117		-2.91231	N.D.	0.193871	N.D.	NA	3.51825	0.00195375	0.0216723
SwissProt	Q9H8Y8		Golgi reassembly-stacking protein 2 OS=Homo sapiens OX=9606 GN=GORASP2 PE=1 SV=3	ENSG00000115806	GORASP2	0	1.83788	1.73836	0.17838	0.43414	0.732047	0.859149	-0.0995152	0.732047	0.857402	-1.22731	-0.421	0.590442	0.161342	0.0846338	0.482689	0.806307	0.0846338	0.48838
SwissProt	Q9H8Y8-3		Isoform 3 of Golgi reassembly-stacking protein 2 OS=Homo sapiens OX=9606 GN=GORASP2	ENSG00000115806	GORASP2	0	0.152785	0.565952	0.142922	0.02934	0.0570658	0.143365	0.416945	0.0581273	0.154041	-2.64703	-1.50774	0.540609	0.109472	0.099937	0.159978	1.14126	0.100225	0.177069
MAJIQ		ENSG00000105220:t:34856092-34856293_34855924-34856165_S1	ENSG00000105220:t:34856092-34856293 OS=Homo sapiens GN=ENSG00000105220	ENSG00000105220	GPI	0.002	2.31958	2.22269	0.0389682	0.119705	0.390071	0.517531	0.114078	0.674783	0.864182		0.184788		0.119111		NA	-0.745816	0.399471	0.98075
MAJIQ		ENSG00000105220:t:34856092-34856293_34855995-34856165_L1	glucose-6-phosphate isomerase [Source:HGNC Symbol;Acc:HGNC:4458]	ENSG00000105220	GPI	0	-0.169002	0.146432	0.8446	0.822473	0.667144	0.854718	-2.49048	0.201088	0.691044	-3.89352	-2.15304	0.300731			NA	-1.77126	0.592685	0.98075
MAJIQ		ENSG00000169727:s:80012774-80012851_80012851-80013038_L0	ENSG00000169727:s:80012774-80012851 OS=Homo sapiens GN=ENSG00000169727	ENSG00000169727	GPS1	0	0.85137	0.878637	0.0843853	0.0359421	0.715037	0.813485	0.0964281	0.887019	0.941033	-1.27469	-0.584639	0.316796	0.364069	0.180528	0.26108	-0.0926581	0.377875	0.509511
MAJIQ		ENSG00000169727:s:80012774-80012851_80012851-80013041_S0	G protein pathway suppressor 1 [Source:HGNC Symbol;Acc:HGNC:4549]	ENSG00000169727	GPS1	0	1.55931	0.793156	0.620894	0.419326	0.232051	0.603097	0.106162	0.0846388	0.224566	-1.89334	-0.895914	0.951553	0.180832	0.257685	0.979485	1.65504	0.132513	0.253469
MAJIQ		ENSG00000233369:t:72598701-72598759_72596188-72598701_S2	general transcription factor IIi pseudogene 4 [Source:HGNC Symbol;Acc:HGNC:51716]	ENSG00000233369	GTF2IP4	0.001	-0.667842	-0.842785	0.594967	0.210897	0.727476	0.875824	0.222375	0.54568	0.686341	0.864153	0.659482	0.23671	0.35644	0.453956	0.983961	-1.8975	0.035732	0.106725
MAJIQ		ENSG00000233369:t:72598701-72598759_72597338-72598701_L2	general transcription factor IIi pseudogene 4 [Source:HGNC Symbol;Acc:HGNC:51716]	ENSG00000233369	GTF2IP4	0	1.13904	0.657837	0.226659	0.669276	0.303554	0.646211	-0.236117	0.341624	0.512935	2.86048	2.66711	0.535884	0.284298	0.610258	0.983961	1.698	0.393847	0.520181
SwissProt	P51610		Host cell factor 1 OS=Homo sapiens OX=9606 GN=HCFC1 PE=1 SV=2	ENSG00000172534	HCFC1	0	-3.86199	-4.66353	N.D.	0.0280133	N.D.	NA	0.40642	0.696707	0.834712	-1.87305	-2.37434	0.132869	0.901891	0.394806	0.783777	-0.501298	0.394806	0.79071
SwissProt	P51610-4		Isoform 4 of Host cell factor 1 OS=Homo sapiens OX=9606 GN=HCFC1	ENSG00000172534	HCFC1	0	2.99966	2.83535	0.12041	0.0684025	0.109068	0.342526	-0.164305	0.109068	0.349591	5.20859	4.23959	0.792988	0.292133	0.117989	0.535558	-0.968993	0.117989	0.540658
SwissProt	Q7Z4V5		Hepatoma-derived growth factor-related protein 2 OS=Homo sapiens OX=9606 GN=HDGFL2 PE=1 SV=1	ENSG00000167674	HDGFRP2; HDGFL2	0	3.42062	2.13065	0.678633	1.98035	0.345967	0.604428	-1.28998	0.345967	0.600019	3.04226	3.14447	1.31206	1.43524	0.931842	0.982702	0.102205	0.931842	0.981403
SwissProt	Q7Z4V5-2		Isoform 2 of Hepatoma-derived growth factor-related protein 2 OS=Homo sapiens OX=9606 GN=HDGFL2	ENSG00000167674	HDGFRP2; HDGFL2	0	2.12701	1.7749	0.0240751	0.206481	0.138877	0.245435	-0.348329	0.139906	0.263947	3.18903	3.70525	0.00900788	0.00341674	0.000174105	0.0128187	0.518186	0.000189186	0.011748
MAJIQ		ENSG00000069998:s:17640016-17640167_17629450-17640016_S2	haloacid dehalogenase like hydrolase domain containing 5 [Source:HGNC Symbol;Acc:HGNC:1843]	ENSG00000069998	HDHD5	0	0.5832	0.571486	0.339456	0.22917	0.962866	0.985333	1.27541	0.530237	0.778474	-1.83644	-1.03622	1.11226	0.944602	0.395985	0.979485	0.67887	0.765667	0.988727
MAJIQ		ENSG00000069998:s:17640016-17640167_17630635-17640016_L2	haloacid dehalogenase like hydrolase domain containing 5 [Source:HGNC Symbol;Acc:HGNC:1843]	ENSG00000069998	HDHD5	0	1.65197	1.28217	0.272511	0.143061	0.105899	0.507983	-0.509982	0.473443	0.744765	1.65436	2.04207	0.918285	0.702292	0.59248	0.983961	-1.00381	0.592558	0.98075
RefSeq	O95819	NM_001243042.1_2	major histocompatibility complex, class I, C (HLA-C), transcript variant 2, mRNA	ENSG00000204525	HLA-C	0	-1.11306	0.518497	0.162984	0.780315	0.023905	0.196235	1.63156	0.023905	0.207118	-2.12405	-1.97395	0.533619	0.929945	0.853789	0.97883	1.80671	0.361439	0.819547
RefSeq		NM_002117.5_2	major histocompatibility complex, class I, C (HLA-C), transcript variant 1, mRNA	ENSG00000204525	HLA-C	0	-2.65512	-1.77652	0.702678	1.10383	0.343419	0.594721	-0.631288	0.717791	0.853142		-4.42491				NA	0.912319	0.288386	0.793631
SwissProt	P17096		High mobility group protein HMG-I/HMG-Y OS=Homo sapiens OX=9606 GN=HMGA1 PE=1 SV=3	ENSG00000137309	HMGA1	0	-0.105799	-1.19045	0.614575	0.979601	0.179583	0.438986	-1.08465	0.179583	0.443372	5.98538	5.85738	0.418484	0.033221	0.625338	0.883268	-0.128009	0.625338	0.888314
SwissProt	P17096-2		Isoform HMG-Y of High mobility group protein HMG-I/HMG-Y OS=Homo sapiens OX=9606 GN=HMGA1	ENSG00000137309	HMGA1	0	-5.17768	-7.14121	N.D.	N.D.	N.D.	NA	-0.574859	0.311896	0.569032	1.6407	0.438945	1.33874	2.57212	0.512544	0.839378	-1.20176	0.512544	0.840354
SwissProt	P17096-3		Isoform HMG-R of High mobility group protein HMG-I/HMG-Y OS=Homo sapiens OX=9606 GN=HMGA1	ENSG00000137309	HMGA1	0	-1.34122	-1.31292	0.0821192	0.527795	0.947087	0.962275	0.0320804	0.939827	0.959223	5.89476	5.94238	0.0606762	0.170792	0.745876	0.790667	0.0495906	0.730979	0.782362
SwissProt	Q92619-2		Isoform 2 of Rho GTPase-activating protein 45 OS=Homo sapiens OX=9606 GN=ARHGAP45	ENSG00000180448	HMHA1; ARHGAP45	0	0.787646	1.35139	0.903049	0.71241	0.443755	0.677969	0.563741	0.443755	0.674465	-0.215844	-0.566462	0.550368	0.468863	0.44821	0.815528	-0.350617	0.44821	0.818954
SwissProt	Q92619		Rho GTPase-activating protein 45 OS=Homo sapiens OX=9606 GN=ARHGAP45 PE=1 SV=2	ENSG00000180448	HMHA1; ARHGAP45	0	-1.77112	1.101	0.0230411	0.0219601	6.14037e-05	0.0183795	2.87589	5.89491e-05	0.0177628	-2.34072	-0.729531	0.355174	0.637743	0.0891265	0.146946	1.61316	0.0898461	0.163906
RefSeq	P04222	NM_002137.3_3	heterogeneous nuclear ribonucleoprotein A2/B1 (HNRNPA2B1), transcript variant A2, mRNA	ENSG00000122566	HNRNPA2B1	0	-0.696753	-2.16497	0.589213	0.556657	0.0689962	0.30354	-2.86319	0.120231	0.400998	3.94884	4.57817	1.57693	0.248423	0.631519	0.927695	-3.10733	0.464575	0.860967
RefSeq	Q8TC07	NM_031243.2_3	heterogeneous nuclear ribonucleoprotein A2/B1 (HNRNPA2B1), transcript variant B1, mRNA	ENSG00000122566	HNRNPA2B1	0	6.50178	5.97778	0.18047	0.242979	0.0399944	0.239097	-0.524005	0.0399944	0.249752	10.9261	10.9301	0.314231	0.339815	0.98866	0.998532	0.0040404	0.98866	0.997268
SwissProt	P51991		Heterogeneous nuclear ribonucleoprotein A3 OS=Homo sapiens OX=9606 GN=HNRNPA3 PE=1 SV=2	ENSG00000170144	HNRNPA3	0	3.92435	3.56833	0.257512	0.21852	0.141915	0.390154	-0.356017	0.141915	0.395342	8.14644	8.02211	0.713964	0.833321	0.85399	0.959638	-0.124328	0.85399	0.960471
SwissProt	P51991-2		Isoform 2 of Heterogeneous nuclear ribonucleoprotein A3 OS=Homo sapiens OX=9606 GN=HNRNPA3	ENSG00000170144	HNRNPA3	0	-1.1944	-3.88813	0.101794	1.02947	0.0161157	0.147226	-3.44712	0.0163117	0.151273	3.12469	2.05711	1.53383	3.31618	0.639415	0.888756	-1.06757	0.639415	0.894762
SwissProt	P07910-2		Isoform C1 of Heterogeneous nuclear ribonucleoproteins C1/C2 OS=Homo sapiens OX=9606 GN=HNRNPC	ENSG00000092199	HNRNPC	0	4.42869	4.30717	0.079067	0.349262	0.588269	0.774518	-0.12152	0.588269	0.771733	9.58527	9.50693	0.299274	0.226539	0.735995	0.921826	-0.0783447	0.735995	0.928386
SwissProt	P07910		Heterogeneous nuclear ribonucleoproteins C1/C2 OS=Homo sapiens OX=9606 GN=HNRNPC PE=1 SV=4	ENSG00000092199	HNRNPC	0		-4.2948	N.D.	N.D.	N.D.	NA	0.638224	0.501297	0.617698	0.575582	-0.930647	0.228957	0.188345	0.0188258	0.0540359	-1.50426	0.0186368	0.0593978
MAJIQ		ENSG00000138668:s:83294599-83294678_83280792-83294599_S0	heterogeneous nuclear ribonucleoprotein D [Source:HGNC Symbol;Acc:HGNC:5036]	ENSG00000138668	HNRNPD	0	6.64663	6.81499	0.329663	0.202376	0.492872	0.746604	1.30613	0.103847	0.249635	9.38518	9.16279	0.287347	0.59782	0.592571	0.983961	0.976195	0.0161589	0.0664437
MAJIQ		ENSG00000138668:s:83294599-83294678_83292737-83294599_L0	heterogeneous nuclear ribonucleoprotein D [Source:HGNC Symbol;Acc:HGNC:5036]	ENSG00000138668	HNRNPD	0	3.81988	1.82903	0.362504	3.11495	0.333245	0.664326	1.82654	0.0128275	0.0937834	3.54341	3.97717	3.08594	2.5009	0.859188	0.987205	1.02917	0.0388129	0.114524
SwissProt	O14979		Heterogeneous nuclear ribonucleoprotein D-like OS=Homo sapiens OX=9606 GN=HNRNPDL PE=1 SV=3	ENSG00000152795	HNRNPDL; HNRPDL	0	2.25426	2.54358	0.123834	1.07511	0.667413	0.821405	0.289311	0.667413	0.81896	6.75416	6.25959	0.115805	0.521176	0.183877	0.623841	-0.494563	0.183877	0.622704
SwissProt	O14979-2		Isoform 2 of Heterogeneous nuclear ribonucleoprotein D-like OS=Homo sapiens OX=9606 GN=HNRNPDL	ENSG00000152795	HNRNPDL; HNRPDL	0	-3.54052	-3.63856	1.45135	1.78132	0.944636	0.975737	-0.0980386	0.944636	0.975063	0.497243	1.74324	1.83987	0.991297	0.360118	0.763608	1.246	0.360118	0.766148
SwissProt	P61978-2		Isoform 2 of Heterogeneous nuclear ribonucleoprotein K OS=Homo sapiens OX=9606 GN=HNRNPK	ENSG00000165119	HNRNPK	0	-3.52201	-5.74772	1.56761	1.46803	0.210441	0.473615	-2.3751	0.096069	0.329868	-0.813963	-2.46066	0.161689	2.16796	0.259762	0.6975	-1.6467	0.259762	0.692657
SwissProt	P61978-3		Isoform 3 of Heterogeneous nuclear ribonucleoprotein K OS=Homo sapiens OX=9606 GN=HNRNPK	ENSG00000165119	HNRNPK	0	7.05338	6.62145	0.113377	0.395379	0.143065	0.39082	-0.43193	0.143065	0.396128	9.20444	8.69661	0.125273	0.338581	0.0714809	0.465779	-0.507834	0.0714809	0.472362
SwissProt	O43390		Heterogeneous nuclear ribonucleoprotein R OS=Homo sapiens OX=9606 GN=HNRNPR PE=1 SV=1	ENSG00000282958	HNRNPR	0	4.4064	4.17967	0.0931934	0.122444	0.0631648	0.255786	-0.226727	0.0631648	0.267034	8.07348	8.06392	0.155656	0.175889	0.947168	0.9853	-0.0095623	0.947168	0.985188
SwissProt	O43390-2		Isoform 2 of Heterogeneous nuclear ribonucleoprotein R OS=Homo sapiens OX=9606 GN=HNRNPR	ENSG00000282958	HNRNPR	0	-6.3027	-6.04325	N.D.	N.D.	N.D.	NA	0.232806	0.195129	0.458467	-1.1975	-2.33764	0.0887432	1.45891	0.38494	0.7769	-0.734003	0.763144	0.935369
MAJIQ		ENSG00000105323:t:41773983-41774253_41770597-41774128_S2	ENSG00000105323:t:41773983-41774253 OS=Homo sapiens GN=ENSG00000105323	ENSG00000105323	HNRNPUL1	0	1.0129	1.08136	0.133582	0.0274951	0.551366	0.67441	-2.55946	0.01401	0.376158	-0.73973	-0.950957	0.0881263	0.115561	0.176159	0.258028	-1.56892	0.0101306	0.878247
MAJIQ		ENSG00000105323:t:41773983-41774253_41770703-41774128_L0	heterogeneous nuclear ribonucleoprotein U like 1 [Source:HGNC Symbol;Acc:HGNC:17011]	ENSG00000105323	HNRNPUL1	0.001	-3.70939					NA	0.64046	0.133423	0.629156	-0.245562	0.716569	0.262003	0.511715	0.0441733	0.904948	-0.536571	0.0936436	0.98075
SwissProt	Q13422		DNA-binding protein Ikaros OS=Homo sapiens OX=9606 GN=IKZF1 PE=1 SV=1	ENSG00000185811	IKZF1	0	1.84749	1.62733	0.137919	0.474029	0.482968	0.709176	-0.220163	0.482968	0.70391	4.85456	4.78634	0.496576	0.49806	0.874729	0.966143	-0.0682215	0.874729	0.966269
SwissProt	Q13422-2		Isoform Ik2 of DNA-binding protein Ikaros OS=Homo sapiens OX=9606 GN=IKZF1	ENSG00000185811	IKZF1	0	-5.71869	-5.15202	1.25181	1.00714	0.61036	0.789394	0.808289	0.375319	0.621849	-1.6916	-1.4882	1.14087	0.333549	0.829871	0.95145	-1.45692	0.461689	0.827004
SwissProt	Q16891-2		Isoform 2 of MICOS complex subunit MIC60 OS=Homo sapiens OX=9606 GN=IMMT	ENSG00000132305	IMMT	0	5.04294	4.33837	0.144152	0.484426	0.0731951	0.277453	-0.704569	0.0731951	0.288695	3.84137	4.18775	0.563855	0.212414	0.375753	0.774072	0.346378	0.375753	0.777772
SwissProt	Q16891-4		Isoform 4 of MICOS complex subunit MIC60 OS=Homo sapiens OX=9606 GN=IMMT	ENSG00000132305	IMMT	0	-3.41634	-4.06418	0.665546	0.762112	0.460779	0.567196	-0.644066	0.462839	0.585666	-1.62528	-1.55234	0.049865	0.521184	0.862013	0.887599	0.0749097	0.859523	0.88924
SwissProt	P01116-2		Isoform 2B of GTPase KRas OS=Homo sapiens OX=9606 GN=KRAS	ENSG00000133703	KRAS	0	-1.11567	-0.657643	0.337859	0.413379	0.211481	0.473615	0.458027	0.211481	0.476856	-2.17704	-1.94267	0.57691	0.370576	0.585672	0.8706	0.234371	0.585672	0.872462
SwissProt	P01116		GTPase KRas OS=Homo sapiens OX=9606 GN=KRAS PE=1 SV=1	ENSG00000133703	KRAS	0.001	-0.00757999	0.0219369	0.215857	0.0766204	0.872191	0.911939	0.0332944	0.855006	0.902331	-0.924148	-1.04989	0.410263	0.107815	0.71579	0.766278	-0.123778	0.719839	0.772741
MAJIQ		ENSG00000126777:s:56128240-56128575_56128330-56130673_L1	kinectin 1 [Source:HGNC Symbol;Acc:HGNC:6467]	ENSG00000126777	KTN1	0	3.30806	1.9971		1.05896		NA	-2.89406	0.100532	0.614917	0.0730047	0.900225	0.453059			NA	1.62946	0.16434	0.98075
MAJIQ		ENSG00000126777:s:56128240-56128575_56128330-56133959_S1	kinectin 1 [Source:HGNC Symbol;Acc:HGNC:6467]	ENSG00000126777	KTN1	0	-1.34421	-1.37076	0.595887	0.427843	0.960835	0.985333	-1.46447	0.0889106	0.589997	-3.37644	-3.67334	1.57786	0.453377	0.820564	0.983961	-0.382609	0.547124	0.98075
SwissProt	Q14847		LIM and SH3 domain protein 1 OS=Homo sapiens OX=9606 GN=LASP1 PE=1 SV=2	ENSG00000002834	LASP1	0	2.93665	4.29112	0.30971	0.298069	0.00547808	0.0967928	1.35447	0.00547808	0.0954564	-0.000671416	1.41013	1.15961	0.477731	0.123186	0.543234	1.4108	0.123186	0.546865
SwissProt	Q14847-2		Isoform 2 of LIM and SH3 domain protein 1 OS=Homo sapiens OX=9606 GN=LASP1	ENSG00000002834	LASP1	0	2.80413	4.48178	0.00181025	0.0798841	0.00113234	0.0323692	1.68142	0.00108205	0.0323001	0.487547	2.59474	0.0487373	0.0429226	0.000474599	0.016828	2.10916	0.000506252	0.0152878
SwissProt	O43561-3		Isoform 3 of Linker for activation of T-cells family member 1 OS=Homo sapiens OX=9606 GN=LAT	ENSG00000213658	LAT	0	-4.06591	0.865846	0.48389	0.809506	0.000823479	0.0488137	4.93175	0.000823479	0.049043	-3.71898	0.936641	0.387579	0.483917	0.000201663	0.0493331	4.65562	0.000201663	0.04696
SwissProt	O43561		Linker for activation of T-cells family member 1 OS=Homo sapiens OX=9606 GN=LAT PE=1 SV=1	ENSG00000213658	LAT	0	-3.87671	1.16718	0.377402	0.23685	0.00387911	0.0434337	5.04767	0.00382144	0.0433331	-1.13584	1.01046	0.0904357	0.0697623	0.00141295	0.0196448	2.14826	0.00136762	0.0193507
SwissProt	Q9UJU2		Lymphoid enhancer-binding factor 1 OS=Homo sapiens OX=9606 GN=LEF1 PE=1 SV=1	ENSG00000138795	LEF1	0	1.43023	1.06879	0.49645	0.660056	0.490668	0.712972	-0.361436	0.490668	0.707998	4.56793	5.62962	0.374164	0.549576	0.0505454	0.424829	1.06168	0.0505454	0.43447
SwissProt	Q9UJU2-6		Isoform 6 of Lymphoid enhancer-binding factor 1 OS=Homo sapiens OX=9606 GN=LEF1	ENSG00000138795	LEF1	0			N.D.	N.D.	N.D.	NA	0.352731	0.0827679	0.306425		-1.61838	N.D.	0.996292	N.D.	NA	5.14347	0.00101268	0.102047
SwissProt	Q9UHB6-5		Isoform 5 of LIM domain and actin-binding protein 1 OS=Homo sapiens OX=9606 GN=LIMA1	ENSG00000050405	LIMA1	0	0.245247	0.576457	0.181029	0.637699	0.435634	0.672986	0.33121	0.435634	0.66839	2.69995	2.90528	0.729391	0.827046	0.76322	0.93026	0.205329	0.76322	0.935369
SwissProt	Q9UHB6-4		Isoform 4 of LIM domain and actin-binding protein 1 OS=Homo sapiens OX=9606 GN=LIMA1	ENSG00000050405	LIMA1	0	-0.924473	-0.0685833	0.0743637	0.121656	0.0135941	0.0668451	0.859667	0.0139827	0.0696547	1.0029	-0.31704	0.546075	0.74342	0.180321	0.251365	-1.31798	0.179527	0.272101
SwissProt	Q8WWI1-3		Isoform 3 of LIM domain only protein 7 OS=Homo sapiens OX=9606 GN=LMO7	ENSG00000136153	LMO7	0	-0.719384	-0.224391	0.383161	0.328239	0.16449	0.4202	0.494993	0.16449	0.424069	0.578201	1.26349	0.217707	0.35227	0.0456399	0.409568	0.685293	0.0456399	0.421383
SwissProt	Q8WWI1		LIM domain only protein 7 OS=Homo sapiens OX=9606 GN=LMO7 PE=1 SV=3	ENSG00000136153	LMO7	0	-3.21811	-1.33345	1.45111	0.0615123	0.20792	0.318143	1.88843	0.207833	0.337054	-0.889864	-2.22174	0.161561	0.391176	0.0469603	0.0947081	-1.3299	0.0480015	0.106508
SwissProt	P50851-2		Isoform 2 of Lipopolysaccharide-responsive and beige-like anchor protein OS=Homo sapiens OX=9606 GN=LRBA	ENSG00000198589	LRBA	0	2.69705	2.62771	0.192425	0.117762	0.622632	0.797222	-0.0693487	0.622632	0.794973	1.01435	1.19592	0.519036	0.0952769	0.583286	0.869935	0.181573	0.583286	0.871744
SwissProt	P50851		Lipopolysaccharide-responsive and beige-like anchor protein OS=Homo sapiens OX=9606 GN=LRBA PE=1 SV=4	ENSG00000198589	LRBA	0	-3.27501	-2.57447	0.27223	0.24068	0.112308	0.216108	0.704324	0.111741	0.23016		-4.07509	N.D.	0.595032	N.D.	NA	2.23543	0.0341462	0.0864996
SwissProt	Q9UPN3		Microtubule-actin cross-linking factor 1, isoforms 1/2/3/5 OS=Homo sapiens OX=9606 GN=MACF1 PE=1 SV=4	ENSG00000127603	MACF1	0	1.81113	2.7819	0.800383	0.573909	0.162964	0.416821	0.970776	0.162964	0.4208	1.93073	1.6247	0.578617	0.319551	0.467544	0.823472	-0.306025	0.467544	0.827652
SwissProt	Q9UPN3-5		Isoform 4 of Microtubule-actin cross-linking factor 1, isoforms 1/2/3/5 OS=Homo sapiens OX=9606 GN=MACF1	ENSG00000127603	MACF1	0	-2.79834	-2.57078	0.59916	1.53547	0.822749	0.911057	0.227568	0.822749	0.909157	-2.51614	-3.62757	1.24099	1.0333	0.299112	0.71818	-1.11143	0.299112	0.718837
MAJIQ		ENSG00000162385:s:53701249-53701307_53694626-53701249_S2	mago homolog, exon junction complex subunit [Source:HGNC Symbol;Acc:HGNC:6815]	ENSG00000162385	MAGOH	0	3.2125	3.00856	0.678062	0.224549	0.646862	0.845793	-0.257655	0.435463	0.585961	5.09101	4.19827	0.390756	1.22504	0.295473	0.979485	-0.043685	0.727486	0.796482
MAJIQ		ENSG00000162385:s:53701249-53701307_53699324-53701249_L2	mago homolog, exon junction complex subunit [Source:HGNC Symbol;Acc:HGNC:6815]	ENSG00000162385	MAGOH	0	4.7014	3.50671	0.472588	0.638268	0.0597002	0.420069	-1.21676	0.0936899	0.235298	5.35038	5.27738	0.486195	0.365752	0.84552	0.987205	0.800224	0.22063	0.35495
SwissProt	P78559-2		Isoform 2 of Microtubule-associated protein 1A OS=Homo sapiens OX=9606 GN=MAP1A	ENSG00000166963	MAP1A	0	2.78448	1.72992	0.264439	0.190351	0.00497302	0.0952617	-1.05456	0.00497302	0.0937052	2.59071	1.76838	0.286836	0.0974855	0.00929785	0.234872	-0.822335	0.00929785	0.241791
SwissProt	P78559		Microtubule-associated protein 1A OS=Homo sapiens OX=9606 GN=MAP1A PE=1 SV=6	ENSG00000166963	MAP1A	0	3.10872	2.26999	0.101505	0.116296	0.0165174	0.0726788	-0.834957	0.0172765	0.0774889	3.94462	2.50216	0.0696378	0.130161	0.00519581	0.0291972	-1.44049	0.00551532	0.0316451
SwissProt	O95819-3		Isoform 3 of Mitogen-activated protein kinase kinase kinase kinase 4 OS=Homo sapiens OX=9606 GN=MAP4K4	ENSG00000071054	MAP4K4	0	3.28468	3.3061	0.258629	0.215031	0.91749	0.962956	0.0214174	0.91749	0.963028	2.41519	2.86266	0.238418	0.0895572	0.0382842	0.385162	0.447469	0.0382842	0.395423
SwissProt	O95819-6		Isoform 6 of Mitogen-activated protein kinase kinase kinase kinase 4 OS=Homo sapiens OX=9606 GN=MAP4K4	ENSG00000071054	MAP4K4	0	-2.78605	-1.84538	0.574866	1.06824	0.250391	0.51164	0.940668	0.250391	0.513511	-3.82806	-2.98523	N.D.	0.500862	N.D.	NA	2.85206	0.0527948	0.435253
RefSeq	Q96GD4	NM_001315.2_1	Homo sapiens mitogen-activated protein kinase 14 (MAPK14), transcript variant 1, mRNA	ENSG00000112062	MAPK14	0	0.00403808	0.273638	0.11339	0.0468671	0.0898223	0.184197	0.2696	0.0898223	0.196128	-2.33707	-1.45161	0.0360154	0.0212156	0.00111238	0.0186284	0.88546	0.00111238	0.0188216
RefSeq		NM_139012.2_1	mitogen-activated protein kinase 14 (MAPK14), transcript variant 2, mRNA	ENSG00000112062	MAPK14	0	1.28178	1.65794	0.0850728	0.189451	0.0349406	0.227634	0.376159	0.0349406	0.237799	-0.403144	0.25418	0.447827	0.201633	0.081299	0.554622	0.657324	0.081299	0.578455
SwissProt	P43243		Matrin-3 OS=Homo sapiens OX=9606 GN=MATR3 PE=1 SV=2	ENSG00000015479	MATR3	0	3.57593	3.29568	0.143754	0.629377	0.493942	0.715034	-0.28025	0.493942	0.710414	8.04949	8.02288	0.350447	0.155582	0.910118	0.975231	-0.0266097	0.910118	0.974749
SwissProt	P43243-2		Isoform 2 of Matrin-3 OS=Homo sapiens OX=9606 GN=MATR3	ENSG00000015479	MATR3	0			N.D.	N.D.	N.D.	NA	0.126206	0.352631	0.603282	-5.38337	-5.53581	2.77439	2.44603	0.958821	0.98845	0.000146516	0.999933	0.999989
SwissProt	Q9UIS9-9		Isoform 9 of Methyl-CpG-binding domain protein 1 OS=Homo sapiens OX=9606 GN=MBD1	ENSG00000141644	MBD1	0	0.237978	-2.31869	0.9475	2.30132	0.149803	0.401267	-2.55667	0.149803	0.406246	2.13725	2.29745	0.496355	0.47234	0.706224	0.912446	0.160201	0.706224	0.919263
SwissProt	Q9UIS9-12		Isoform 12 of Methyl-CpG-binding domain protein 1 OS=Homo sapiens OX=9606 GN=MBD1	ENSG00000141644	MBD1	0			N.D.	N.D.	N.D.	NA	-0.0460399	0.695127	0.782472	0.603027	1.65583	0.157799	0.0179848	0.0111881	0.0410608	1.05477	0.0110815	0.0445848
SwissProt	O95243		Methyl-CpG-binding domain protein 4 OS=Homo sapiens OX=9606 GN=MBD4 PE=1 SV=1	ENSG00000129071	MBD4	0	-4.27483	-4.45836	0.729257	1.33002	0.844242	0.924194	-0.183532	0.844242	0.923555	0.488584	-0.00508497	0.555124	0.431385	0.290754	0.711322	-0.493669	0.290754	0.710361
SwissProt	O95243-2		Isoform 2 of Methyl-CpG-binding domain protein 4 OS=Homo sapiens OX=9606 GN=MBD4	ENSG00000129071	MBD4	0	-4.53249	-5.89582	N.D.	N.D.	N.D.	NA	-0.379279	0.549881	0.746829	-3.34956	-3.12546	1.44831	0.135054	0.849164	0.957988	-0.856574	0.56504	0.864606
RefSeq		NM_001330246.1_2	Homo sapiens methionyl aminopeptidase 2 (METAP2), transcript variant 5, mRNA	ENSG00000111142	METAP2	0	-2.03736	-4.04125	0.401968	0.503845	0.0480319	0.125453	-2.00389	0.0480319	0.133281	-2.54662	-2.49097	0.23638	0.0489833	0.77536	0.814567	0.0556508	0.77536	0.81552
RefSeq		NM_006838.3_2	methionyl aminopeptidase 2 (METAP2), transcript variant 1, mRNA	ENSG00000111142	METAP2	0	-0.950013	-3.28591	0.219329	0.236858	0.000233173	0.0450086	-2.33589	0.000233173	0.0440384	-1.88536	-3.94171	0.346343	0.338385	0.0018195	0.168318	-2.05634	0.0018195	0.168087
RefSeq		NM_001330206.1_2	Homo sapiens migration and invasion enhancer 1 (MIEN1), transcript variant 2, mRNA	ENSG00000141741	MIEN1	0.007	-0.83444	-0.672802	0.059209	0.112887	0.214794	0.318573	0.161638	0.214794	0.336699	-3.7936	-2.71517	0.0113596	0.163269	0.0113206	0.0393958	1.07843	0.0113206	0.0426793
RefSeq	P22626	NM_032339.4_2	migration and invasion enhancer 1 (MIEN1), transcript variant 1, mRNA	ENSG00000141741	MIEN1	0	-0.0126399	-0.406431	0.641899	0.117527	0.47414	0.691282	-2.36826	0.303909	0.558407	-1.9355	-2.80822	0.511043	0.178099	0.0491562	0.499747	-0.872719	0.0491562	0.528685
SwissProt	P46013		Proliferation marker protein Ki-67 OS=Homo sapiens OX=9606 GN=MKI67 PE=1 SV=2	ENSG00000148773	MKI67	0	5.07998	5.38955	0.218661	0.222314	0.160638	0.413511	0.309573	0.160638	0.41774	8.06076	7.0113	0.188699	0.37845	0.0126621	0.25151	-1.04946	0.0126621	0.261563
SwissProt	P46013-2		Isoform Short of Proliferation marker protein Ki-67 OS=Homo sapiens OX=9606 GN=MKI67	ENSG00000148773	MKI67	0	-4.51599	-4.34975	0.0654127	2.27613	0.927188	0.966399	0.0473682	0.970817	0.987	0.299197	-0.916893	1.06095	0.186521	0.224415	0.667758	-3.03166	0.189047	0.63172
SwissProt	Q13330		Metastasis-associated protein MTA1 OS=Homo sapiens OX=9606 GN=MTA1 PE=1 SV=2	ENSG00000182979	MTA1	0	-0.787035	0.0670101	0.75868	0.723334	0.231028	0.493396	0.854045	0.231028	0.495987	3.3627	2.71742	0.298003	0.300601	0.0575531	0.44143	-0.645277	0.0575531	0.451249
SwissProt	Q13330-3		Isoform 3 of Metastasis-associated protein MTA1 OS=Homo sapiens OX=9606 GN=MTA1	ENSG00000182979	MTA1	0			N.D.	N.D.	N.D.	NA	0.163805	0.478446	0.701511	-4.28811	-3.63405	2.53487	N.D.	N.D.	NA	-0.447924	0.795432	0.943724
SwissProt	Q9NVV4-2		Isoform 2 of Poly(A) RNA polymerase, mitochondrial OS=Homo sapiens OX=9606 GN=MTPAP	ENSG00000107951	MTPAP	0	1.51506	1.74599	0.704973	0.768739	0.720879	0.852706	0.230929	0.720879	0.851328	3.00347	3.22188	0.288127	1.05123	0.746032	0.923001	0.218414	0.746032	0.92931
SwissProt	Q9NVV4		Poly(A) RNA polymerase, mitochondrial OS=Homo sapiens OX=9606 GN=MTPAP PE=1 SV=1	ENSG00000107951	MTPAP	0	-2.45904	-1.23866	1.5868	0.68085	0.422833	0.532408	1.22415	0.42098	0.550197	1.87076	1.84122	0.233323	0.0271815	0.875248	0.896218	-0.0275681	0.882706	0.904968
SwissProt	Q9P2K5		Myelin expression factor 2 OS=Homo sapiens OX=9606 GN=MYEF2 PE=1 SV=3	ENSG00000104177	MYEF2	0	-0.0753097	-0.567529	0.703031	0.115185	0.297493	0.558522	-0.49222	0.297493	0.557879	3.78964	4.02741	0.414454	0.510184	0.564932	0.864063	0.237778	0.564932	0.864606
SwissProt	Q9P2K5-2		Isoform 2 of Myelin expression factor 2 OS=Homo sapiens OX=9606 GN=MYEF2	ENSG00000104177	MYEF2	0		-5.69587	N.D.	N.D.	N.D.	NA	0.284142	0.241371	0.504299	-3.82628	-2.29734	0.682886	0.567297	0.0406206	0.393342	1.52894	0.0406206	0.405651
SwissProt	P35580-3		Isoform 3 of Myosin-10 OS=Homo sapiens OX=9606 GN=MYH10	ENSG00000133026	MYH10	0	5.3576	4.68558	0.0914506	0.544644	0.102768	0.332088	-0.672013	0.102768	0.340088	3.57071	3.64609	0.691356	0.606764	0.893992	0.97137	0.0753798	0.893992	0.970211
SwissProt	P35580-4		Isoform 4 of Myosin-10 OS=Homo sapiens OX=9606 GN=MYH10	ENSG00000133026	MYH10	0	4.67388	4.50176	0.0327732	0.0496548	0.0548714	0.140414	-0.16834	0.0620751	0.160117	2.37234	3.08776	0.111746	0.143696	0.0308786	0.0725492	0.717389	0.0298392	0.0799292
SwissProt	P55209		Nucleosome assembly protein 1-like 1 OS=Homo sapiens OX=9606 GN=NAP1L1 PE=1 SV=1	ENSG00000187109	NAP1L1	0	3.34366	2.95183	0.319045	0.559991	0.351733	0.607584	-0.391835	0.351733	0.602851	2.62509	2.29972	0.0445075	0.825465	0.532845	0.850155	-0.325366	0.532845	0.849898
SwissProt	P55209-3		Isoform 3 of Nucleosome assembly protein 1-like 1 OS=Homo sapiens OX=9606 GN=NAP1L1	ENSG00000187109	NAP1L1	0	-4.46077		0.585092	N.D.	N.D.	NA	-1.12553	0.0997335	0.33482	-6.25775		N.D.	N.D.	N.D.	NA	0.134284	0.525901	0.847314
MAJIQ		ENSG00000134265:t:10539121-10539868_10526155-10539759_S0	NSF attachment protein gamma [Source:HGNC Symbol;Acc:HGNC:7642]	ENSG00000134265	NAPG	0	0.0184695	0.3347	0.295705	0.180311	0.188932	0.587858	-1.50382	0.0118228	0.376158	-3.59138	-4.60415	0.263165			NA	-0.535094	0.173941	0.98075
MAJIQ		ENSG00000134265:t:10539121-10539868_10534493-10539759_L1	ENSG00000134265:t:10539121-10539868 OS=Homo sapiens GN=ENSG00000134265	ENSG00000134265	NAPG	0	-0.435341	-0.605925	0.0349923	0.174766	0.30857	0.451709	0.286236	0.416958	0.725049		-1.99931		0.113206		NA	1.46381	0.0743709	0.98075
MAJIQ		ENSG00000132780:s:46072154-46072352_46072263-46072993_L1	nuclear autoantigenic sperm protein [Source:HGNC Symbol;Acc:HGNC:7644]	ENSG00000132780	NASP	0	3.63556	1.90685	0.507612	1.40924	0.116252	0.523076	-2.21415	0.302162	0.701368	-0.944611	-1.54851	1.61904	1.6597	0.675275	0.983961	-2.05652	0.455676	0.98075
MAJIQ		ENSG00000132780:s:46072154-46072352_46072263-46078841_S1	nuclear autoantigenic sperm protein [Source:HGNC Symbol;Acc:HGNC:7644]	ENSG00000132780	NASP	0	1.5482	-0.0657982	0.695175	0.398057	0.0631554	0.429337	-0.876664	0.666669	0.863372	-4.82451	-2.82976				NA	-0.0228909	0.992625	0.998459
SwissProt	Q86XI2		Condensin-2 complex subunit G2 OS=Homo sapiens OX=9606 GN=NCAPG2 PE=1 SV=1	ENSG00000146918	NCAPG2	0	-0.852566	-1.77033	0.18283	0.173773	0.00324064	0.0816694	-0.917763	0.00324064	0.0815624	-1.35772	-1.78834	0.78056	1.08271	0.606103	0.877645	-0.430618	0.606103	0.880119
SwissProt	Q86XI2-2		Isoform 2 of Condensin-2 complex subunit G2 OS=Homo sapiens OX=9606 GN=NCAPG2	ENSG00000146918	NCAPG2	0.002	-2.23268	-2.95435	N.D.	N.D.	N.D.	NA	-0.443405	0.860836	0.906708	-2.95242	-4.52549	0.0504541	N.D.	N.D.	NA	-2.36029	0.0955098	0.171567
RefSeq		NM_001348149.1_1	nuclear receptor coactivator 5 (NCOA5), transcript variant 3, mRNA	ENSG00000124160	NCOA5	0	-0.942153	-0.907175	0.509028	0.249952	0.936086	0.971659	-1.78975	0.388357	0.624644	-0.937682	-0.325338	1.27921	0.80517	0.598609	0.918708	-1.49989	0.543479	0.895
RefSeq	O95793	NM_020967.2_1	nuclear receptor coactivator 5 (NCOA5), transcript variant 1, mRNA	ENSG00000124160	NCOA5	0	-0.806063	-1.03424	0.321897	0.995068	0.72471	0.861818	-0.228175	0.72471	0.858537	4.03068	3.6734	0.640069	0.706335	0.551606	0.902784	-0.357272	0.551606	0.899425
SwissProt	P56181-2		Isoform 2 of NADH dehydrogenase [ubiquinone] flavoprotein 3, mitochondrial OS=Homo sapiens OX=9606 GN=NDUFV3	ENSG00000160194	NDUFV3	0.003	-2.05501	-2.772	0.141363	1.17335	0.336011	0.595839	-1.81759	0.205372	0.470537	-5.96862	-6.56964	N.D.	N.D.	N.D.	NA	0.0677161	0.844128	0.957832
SwissProt	P56181		NADH dehydrogenase [ubiquinone] flavoprotein 3, mitochondrial OS=Homo sapiens OX=9606 GN=NDUFV3 PE=1 SV=2	ENSG00000160194	NDUFV3	0			N.D.	N.D.	N.D.	NA	-0.0936911	0.300539	0.435302		-2.89744	N.D.	0.131835	N.D.	NA	3.45785	0.000694807	0.0163602
SwissProt	Q9GZT8		NIF3-like protein 1 OS=Homo sapiens OX=9606 GN=NIF3L1 PE=1 SV=2	ENSG00000196290	NIF3L1	0	0.782837	0.66404	0.413183	0.0736281	0.64962	0.81135	-0.118797	0.64962	0.809339	-0.572158	-2.11171	0.659374	2.12168	0.29628	0.717646	-1.53956	0.29628	0.717318
SwissProt	Q9GZT8-3		Isoform 3 of NIF3-like protein 1 OS=Homo sapiens OX=9606 GN=NIF3L1	ENSG00000196290	NIF3L1	0	-3.46517	-2.2956	0.209495	N.D.	N.D.	NA	-0.487089	0.762223	0.875728	-1.8712	-2.25752	0.0303086	0.604222	0.330763	0.74308	-0.386315	0.330763	0.743982
SwissProt	Q86X76		Deaminated glutathione amidase OS=Homo sapiens OX=9606 GN=NIT1 PE=1 SV=2	ENSG00000158793	NIT1	0	0.799598	1.4375	0.204685	0.732867	0.220128	0.482785	0.637906	0.220128	0.485756	-1.17877	-0.653959	0.510733	0.326995	0.208268	0.654961	0.524813	0.208268	0.652848
SwissProt	Q86X76-3		Isoform 4 of Deaminated glutathione amidase OS=Homo sapiens OX=9606 GN=NIT1	ENSG00000158793	NIT1	0	0.525212	1.22934	0.070769	0.0301176	0.00591258	0.0493788	0.707908	0.00559999	0.0499856	-2.61089	-3.87478	1.2322	0.0718253	0.284566	0.361043	-1.26192	0.285475	0.384651
SwissProt	P06748		Nucleophosmin OS=Homo sapiens OX=9606 GN=NPM1 PE=1 SV=2	ENSG00000181163	NPM1	0	6.65322	6.20669	0.402768	0.334235	0.213557	0.475519	-0.446525	0.213557	0.479352	10.3016	9.54857	0.465897	0.571816	0.151743	0.580494	-0.753017	0.151743	0.580566
SwissProt	P06748-3		Isoform 3 of Nucleophosmin OS=Homo sapiens OX=9606 GN=NPM1	ENSG00000181163	NPM1	0	-2.65203	-3.10285	0.829721	N.D.	N.D.	NA	-2.43003	0.0918225	0.321633	-0.924144	-1.28112	N.D.	0.302114	N.D.	NA	1.81299	0.532154	0.849893
RefSeq		NM_001321358.1_1	Homo sapiens nuclear receptor binding protein 1 (NRBP1), transcript variant 3, mRNA	ENSG00000115216	NRBP1	0	-1.61343	-1.42264	0.496992	0.160056	0.656787	0.733413	0.19079	0.656787	0.735508	-4.98003	-3.29876		0.0455464		NA	2.45531	0.0867921	0.148561
RefSeq		NM_001321362.1_1	nuclear receptor binding protein 1 (NRBP1), transcript variant 6, mRNA	ENSG00000115216	NRBP1	0	-0.267205	0.479492	0.853992	0.230526	0.217528	0.486343	0.746697	0.217528	0.494918	-2.74607	-1.5089	0.904264	0.951739	0.177965	0.690142	1.23717	0.177965	0.71362
SwissProt	Q9UNZ2-4		Isoform 2 of NSFL1 cofactor p47 OS=Homo sapiens OX=9606 GN=NSFL1C	ENSG00000088833	NSFL1C	0	-3.24484	-3.0715	0.564618	0.883993	0.800412	0.899219	-0.774261	0.507526	0.720328			N.D.	N.D.	N.D.	NA	0.195998	0.0241506	0.326054
SwissProt	Q9UNZ2-5		Isoform 3 of NSFL1 cofactor p47 OS=Homo sapiens OX=9606 GN=NSFL1C	ENSG00000088833	NSFL1C	0	3.82158	2.77533	0.580168	0.271783	0.0474169	0.223026	-1.04624	0.0474169	0.232726	0.35613	-0.707037	1.65138	0.803069	0.372695	0.77162	-1.06317	0.372695	0.774885
MAJIQ		ENSG00000070081:t:17351674-17351847_17333667-17351674_S0	nucleobindin 2 [Source:HGNC Symbol;Acc:HGNC:8044]	ENSG00000070081	NUCB2	0	-0.56178	-0.867127	0.549093	0.0625574	0.511025	0.764544	0.26494	0.480396	0.745715	-3.15697	-3.67932		0.350596		NA	-0.14021	0.571213	0.98075
MAJIQ		ENSG00000070081:t:17351674-17351847_17337022-17351674_L0	nucleobindin 2 [Source:HGNC Symbol;Acc:HGNC:8044]	ENSG00000070081	NUCB2	0	0.500291	1.04023	0.423207	2.31149	0.710976	0.869118	-0.0690573	0.819478	0.926951	0.00318588	-0.605478	0.981	1.8225	0.637318	0.983961	-1.29658	0.373478	0.98075
SwissProt	Q9BRJ7		Tudor-interacting repair regulator protein OS=Homo sapiens OX=9606 GN=NUDT16L1 PE=1 SV=1	ENSG00000168101	NUDT16L1	0	-1.94714	-1.08714	1.36412	0.352361	0.350017	0.606658	0.859999	0.350017	0.601955	-0.374058	-1.64096	0.409533	0.56737	0.0349839	0.366228	-1.2669	0.0349839	0.378004
SwissProt	Q9BRJ7-2		Isoform 2 of Tudor-interacting repair regulator protein OS=Homo sapiens OX=9606 GN=NUDT16L1	ENSG00000168101	NUDT16L1	0	-4.17676	-3.44585	0.184052	0.204633	0.0641505	0.152923	0.734683	0.0623451	0.160386	0.0934584	-0.93678	0.105243	0.0264063	0.00550044	0.0296586	-1.02827	0.00532324	0.0311656
SwissProt	Q9NZJ9		Diphosphoinositol polyphosphate phosphohydrolase 2 OS=Homo sapiens OX=9606 GN=NUDT4 PE=1 SV=2	ENSG00000173598	NUDT4; NUDT4P1; NUDT4B	0.001	-0.722613	-1.83317	1.00061	0.467629	0.156551	0.408024	-1.11055	0.156551	0.413212	-3.14182	-3.02446	0.750125	0.8529	0.866669	0.963702	0.117357	0.866669	0.963948
SwissProt	Q9NZJ9-2		Isoform 2 of Diphosphoinositol polyphosphate phosphohydrolase 2 OS=Homo sapiens OX=9606 GN=NUDT4	ENSG00000173598	NUDT4; NUDT4P1; NUDT4B	0.002	-1.67091	-1.81755	0.104821	0.272649	0.551359	0.647943	-0.142858	0.557723	0.665762	-3.8319	-3.43213	N.D.	0.11955	N.D.	NA	1.70696	0.321973	0.417886
SwissProt	Q14980		Nuclear mitotic apparatus protein 1 OS=Homo sapiens OX=9606 GN=NUMA1 PE=1 SV=2	ENSG00000137497	NUMA1	0	2.63032	2.77944	0.297089	0.229334	0.52916	0.739285	0.149122	0.52916	0.73483	6.96334	7.16953	0.384857	0.327404	0.51868	0.841363	0.206195	0.51868	0.842134
SwissProt	Q14980-2		Isoform 2 of Nuclear mitotic apparatus protein 1 OS=Homo sapiens OX=9606 GN=NUMA1	ENSG00000137497	NUMA1	0		-6.05735	N.D.	1.81506	N.D.	NA	0.161491	0.841376	0.92161	0.703393	0.981299	0.667274	0.601714	0.620553	0.882058	0.277906	0.620553	0.886034
SwissProt	P49790		Nuclear pore complex protein Nup153 OS=Homo sapiens OX=9606 GN=NUP153 PE=1 SV=2	ENSG00000124789	NUP153	0	0.924852	0.394084	0.570345	0.435063	0.26924	0.532935	-0.530768	0.26924	0.532604	4.07402	3.62785	0.13431	0.129739	0.0143957	0.264347	-0.446173	0.0143957	0.27416
SwissProt	P49790-3		Isoform 3 of Nuclear pore complex protein Nup153 OS=Homo sapiens OX=9606 GN=NUP153	ENSG00000124789	NUP153	0	0.497937	0.168305	0.167882	0.060125	0.120454	0.223944	-0.325855	0.124896	0.245136	2.03463	0.981835	0.174769	0.0474861	0.0144757	0.0471111	-1.05083	0.0145586	0.0520176
SwissProt	P35658		Nuclear pore complex protein Nup214 OS=Homo sapiens OX=9606 GN=NUP214 PE=1 SV=2	ENSG00000126883	NUP214	0	-1.1122	0.262577	0.511863	0.228255	0.0131716	0.137758	1.37478	0.0131716	0.139322	4.1177	3.55401	0.230873	0.246052	0.0443996	0.408652	-0.563691	0.0443996	0.418894
SwissProt	P35658-5		Isoform 5 of Nuclear pore complex protein Nup214 OS=Homo sapiens OX=9606 GN=NUP214	ENSG00000126883	NUP214	0	-1.74859	-1.70448	0.541133	0.952711	0.959769	0.971641	0.0478928	0.956225	0.969409	1.89368	1.81502	0.136933	0.168	0.658835	0.717364	-0.0766951	0.662721	0.723869
MAJIQ		ENSG00000122884:s:74806683-74806859_74803715-74806683_S0	ENSG00000122884:s:74806683-74806859 OS=Homo sapiens GN=ENSG00000122884	ENSG00000122884	P4HA1	0	0.28919	0.176166	0.559442	0.226386	0.815922	0.878365	-2.07149	0.208759	0.691044		-2.66038		0.510348		NA	0.934409	0.532173	0.98075
MAJIQ		ENSG00000122884:s:74806683-74806859_74804809-74806683_L0	prolyl 4-hydroxylase subunit alpha 1 [Source:HGNC Symbol;Acc:HGNC:8546]	ENSG00000122884	P4HA1	0	0.333806	-0.143593	0.268241	0.106365	0.0456737	0.390037	0.108138	0.471345	0.743986	-2.09886	-1.66842	0.83047	0.0818405	0.422134	0.983961	-0.53652	0.0748604	0.98075
SwissProt	Q13153		Serine/threonine-protein kinase PAK 1 OS=Homo sapiens OX=9606 GN=PAK1 PE=1 SV=2	ENSG00000149269	PAK1	0	-0.868665	-1.19961	0.43316	0.443284	0.407384	0.652195	-0.330943	0.407384	0.64674	-3.36886	-5.2273	N.D.	0.125681	N.D.	NA	-0.00319587	0.997963	0.999828
SwissProt	Q13153-2		Isoform 2 of Serine/threonine-protein kinase PAK 1 OS=Homo sapiens OX=9606 GN=PAK1	ENSG00000149269	PAK1	0	-3.01277	-3.18242	0.0151458	0.320879	0.533	0.631202	-0.165876	0.542868	0.654089			N.D.	N.D.	N.D.	NA	0.260909	0.0990502	0.175641
SwissProt	Q15366-2		Isoform 2 of Poly(rC)-binding protein 2 OS=Homo sapiens OX=9606 GN=PCBP2	ENSG00000197111	PCBP2	0	4.56683	4.10742	0.245666	0.507805	0.231196	0.493396	-0.459403	0.231196	0.495987	5.28485	4.62615	0.0846608	0.102641	0.00101589	0.10493	-0.6587	0.00101589	0.102047
SwissProt	Q15366-3		Isoform 3 of Poly(rC)-binding protein 2 OS=Homo sapiens OX=9606 GN=PCBP2	ENSG00000197111	PCBP2	0	-5.36963		N.D.	N.D.	N.D.	NA	-0.143119	0.558067	0.665762	-2.03399	-2.15369	0.687027	0.486669	0.85924	0.885129	-0.117735	0.861243	0.890592
SwissProt	Q15366-6		Isoform 6 of Poly(rC)-binding protein 2 OS=Homo sapiens OX=9606 GN=PCBP2	ENSG00000197111	PCBP2	0	4.26691	4.2509	0.0318143	0.0559026	0.758382	0.822232	-0.0122383	0.820291	0.877298	5.02621	4.91058	0.120981	0.0755712	0.370261	0.444587	-0.113671	0.373169	0.464015
MAJIQ		ENSG00000165494:t:82879470-82881037_82878547-82879470_S0	PCF11, cleavage and polyadenylation factor subunit [Source:HGNC Symbol;Acc:HGNC:30097]	ENSG00000165494	PCF11	0	-0.658308	-0.967804	1.10695	0.453753	0.67729	0.858025	1.60916	0.0864084	0.226363	1.95913	2.14043	0.511677	0.783159	0.753975	0.983961	2.02072	0.000650329	0.0201054
MAJIQ		ENSG00000165494:t:82879470-82881037_82878940-82879470_L0	ENSG00000165494:t:82879470-82881037 OS=Homo sapiens GN=ENSG00000165494	ENSG00000165494	PCF11	0						NA	1.17383	0.0122011	0.0922794	-1.38883	-1.84852	0.321921			NA	-0.265585	0.0920624	0.194782
SwissProt	Q15154-2		Isoform 2 of Pericentriolar material 1 protein OS=Homo sapiens OX=9606 GN=PCM1	ENSG00000078674	PCM1	0	-4.39997	-4.80214	0.984172	0.606211	0.579247	0.770048	-0.402173	0.579247	0.767376	-2.37078	-2.93772	1.08603	0.517709	0.460212	0.821769	-0.566934	0.460212	0.825802
SwissProt	Q15154-5		Isoform 5 of Pericentriolar material 1 protein OS=Homo sapiens OX=9606 GN=PCM1	ENSG00000078674	PCM1	0	0.820302	0.916815	0.397443	0.808159	0.861779	0.933553	0.0965128	0.861779	0.93212	4.2636	2.79792	0.127923	0.458834	0.00596714	0.19683	-1.46568	0.00596714	0.202765
SwissProt	Q99447		Ethanolamine-phosphate cytidylyltransferase OS=Homo sapiens OX=9606 GN=PCYT2 PE=1 SV=1	ENSG00000185813	PCYT2	0	1.49509	0.749694	0.313726	0.643078	0.145498	0.394397	-0.745395	0.145498	0.399672	-2.07235	-1.23501	0.841743	0.766491	0.271665	0.703384	0.837346	0.271665	0.69926
SwissProt	Q99447-3		Isoform 3 of Ethanolamine-phosphate cytidylyltransferase OS=Homo sapiens OX=9606 GN=PCYT2	ENSG00000185813	PCYT2	0	0.873789	0.725815	0.10787	0.0195745	0.196497	0.306782	-0.144197	0.196522	0.326074	-2.05709	-1.43285	0.715658	0.144221	0.350116	0.42432	0.626209	0.349024	0.442239
SwissProt	Q8NB37		Glutamine amidotransferase-like class 1 domain-containing protein 1 OS=Homo sapiens OX=9606 GN=GATD1 PE=1 SV=1	ENSG00000177225	PDDC1; GATD1	0	-0.952606	-1.45129	0.270811	0.876371	0.399686	0.646611	-0.498681	0.399686	0.641075	-2.88991	-2.04964	1.21715	0.447052	0.436059	0.809072	-0.664847	0.711057	0.920582
SwissProt	Q8NB37-2		Isoform 2 of Glutamine amidotransferase-like class 1 domain-containing protein 1 OS=Homo sapiens OX=9606 GN=GATD1	ENSG00000177225	PDDC1; GATD1	0.001	-2.06641	-2.72072	0.0953547	0.0917093	0.019836	0.0809167	-0.650526	0.0202835	0.0852807	-5.2917	-5.27373	0.328123	0.672062	0.975985	0.979604	0.0199328	0.973479	0.978018
SwissProt	Q15084-5		Isoform 5 of Protein disulfide-isomerase A6 OS=Homo sapiens OX=9606 GN=PDIA6	ENSG00000143870	PDIA6	0	4.4802	4.61637	0.324719	0.217635	0.578816	0.770048	0.13617	0.578816	0.767376	1.11548	1.08981	0.475285	0.478162	0.950583	0.985977	-0.0256704	0.950583	0.985207
SwissProt	Q15084-2		Isoform 2 of Protein disulfide-isomerase A6 OS=Homo sapiens OX=9606 GN=PDIA6	ENSG00000143870	PDIA6	0	4.44421	4.2782	0.228574	0.125009	0.462621	0.569273	-0.16223	0.475771	0.595093	-0.0778449	0.662054	0.123375	0.0482747	0.0156552	0.0488923	0.741866	0.0161731	0.0547875
SwissProt	Q96HC4-6		Isoform 6 of PDZ and LIM domain protein 5 OS=Homo sapiens OX=9606 GN=PDLIM5	ENSG00000163110	PDLIM5	0.001	-1.61466	0.293278	0.177319	0.301378	0.000699122	0.0425314	1.90794	0.000699122	0.0421365	-2.94237	-2.32329	0.375819	0.634222	0.219494	0.666804	0.619072	0.219494	0.666865
SwissProt	Q96HC4		PDZ and LIM domain protein 5 OS=Homo sapiens OX=9606 GN=PDLIM5 PE=1 SV=5	ENSG00000163110	PDLIM5	0	-2.63214	-0.749696	0.205053	0.00148864	0.00588084	0.0493788	1.88622	0.00600377	0.0506267	-3.5799	-2.78294	0.0858083	0.841422	0.314212	0.389527	0.798929	0.315114	0.411088
SwissProt	P35080		Profilin-2 OS=Homo sapiens OX=9606 GN=PFN2 PE=1 SV=3	ENSG00000070087	PFN2	0	2.17844	0.481827	0.475026	1.20701	0.0861558	0.302813	-1.69662	0.0861558	0.312065	0.484143	-1.17124	1.19858	4.91618	0.601254	0.877278	-1.65538	0.601254	0.879726
SwissProt	P35080-2		Isoform IIb of Profilin-2 OS=Homo sapiens OX=9606 GN=PFN2	ENSG00000070087	PFN2	0	-2.46713	-5.46698	1.44866	1.02492	0.0429003	0.21508	-2.99985	0.0429003	0.223668	-5.31114	-3.47819	1.06473	N.D.	N.D.	NA	0.291917	0.817381	0.951371
RefSeq	O60506	NM_001170543.1_1	Homo sapiens PGAM family member 5, mitochondrial serine/threonine protein phosphatase (PGAM5), transcript variant 1, mRNA	ENSG00000247077	PGAM5	0	1.71087	2.45115	0.135447	0.134079	0.0315791	0.0993131	0.740282	0.0315791	0.104892	4.58467	4.3143	0.0758033	0.0382933	0.0459596	0.0862345	-0.270368	0.0459596	0.0955327
RefSeq		NM_001170544.1_1	PGAM family member 5, mitochondrial serine/threonine protein phosphatase (PGAM5), transcript variant 2, mRNA	ENSG00000247077	PGAM5	0	3.21699	2.72632	0.0327246	0.23612	0.0234761	0.194617	-0.490669	0.0234761	0.205402	4.00061	3.73069	0.46319	0.351229	0.466323	0.873881	-0.269922	0.466323	0.862147
SwissProt	O43189		PHD finger protein 1 OS=Homo sapiens OX=9606 GN=PHF1 PE=1 SV=3	ENSG00000112511	PHF1	0.001	-3.03529	-3.69153	0.282906	1.26652	0.41769	0.659106	-1.49322	0.208667	0.474491	-2.15205	-2.20057	0.671097	1.57183	0.96314	0.989739	-0.0485195	0.96314	0.988937
SwissProt	O43189-2		Isoform 1 of PHD finger protein 1 OS=Homo sapiens OX=9606 GN=PHF1	ENSG00000112511	PHF1	0			N.D.	N.D.	N.D.	NA	-0.106011	0.354183	0.489629	-3.07096	-2.91396	0.268963	0.190178	0.569749	0.634896	0.158969	0.56893	0.641161
SwissProt	O94880		PHD finger protein 14 OS=Homo sapiens OX=9606 GN=PHF14 PE=1 SV=2	ENSG00000106443	PHF14	0	-0.411795	-0.252843	0.465048	0.217433	0.620195	0.795903	0.158952	0.620195	0.793521	2.63225	1.96012	0.292972	0.52621	0.125387	0.5446	-0.672132	0.125387	0.54796
SwissProt	O94880-2		Isoform 2 of PHD finger protein 14 OS=Homo sapiens OX=9606 GN=PHF14	ENSG00000106443	PHF14	0		-5.99839	N.D.	N.D.	N.D.	NA	0.37211	0.0626925	0.266092	-2.83072	-2.93188	0.268638	0.447753	0.754056	0.926604	-0.101164	0.754056	0.931495
SwissProt	A8MW92		PHD finger protein 20-like protein 1 OS=Homo sapiens OX=9606 GN=PHF20L1 PE=1 SV=2	ENSG00000129292	PHF20L1	0	-3.96671	-3.0345	2.98255	2.11608	0.68165	0.82845	0.932217	0.68165	0.825696	1.2604	1.49382	0.368189	0.186886	0.38295	0.776588	0.233417	0.38295	0.781417
SwissProt	A8MW92-2		Isoform 2 of PHD finger protein 20-like protein 1 OS=Homo sapiens OX=9606 GN=PHF20L1	ENSG00000129292	PHF20L1	0		-6.50671	N.D.	0.892293	N.D.	NA	-0.31346	0.581634	0.76808	-2.17794	-2.09541	0.762717	0.775039	0.901753	0.973397	0.0825357	0.901753	0.972777
MAJIQ		ENSG00000146247:s:79707131-79707314_79700699-79707131_S2	pleckstrin homology domain interacting protein [Source:HGNC Symbol;Acc:HGNC:15673]	ENSG00000146247	PHIP	0						NA	1.45673	0.00118089	0.0382349	1.83419	1.75715	1.88942	0.00369722	0.959812	0.989123	0.738239	0.0732937	0.165729
MAJIQ		ENSG00000146247:s:79707131-79707314_79700702-79707131_L2	pleckstrin homology domain interacting protein [Source:HGNC Symbol;Acc:HGNC:15673]	ENSG00000146247	PHIP	0	-1.69148	-1.09734		0.557069		NA	-1.87317	0.259598	0.43928	1.24588	-0.0607717	0.0703449	1.09292	0.107656	0.904948	0.0252778	0.878127	0.917155
SwissProt	Q9UBF8		Phosphatidylinositol 4-kinase beta OS=Homo sapiens OX=9606 GN=PI4KB PE=1 SV=1	ENSG00000143393	PI4KB	0.001	-3.10905	-2.7428	1.13345	0.787613	0.669669	0.822917	0.36625	0.669669	0.820745	-3.45914	-5.10116	0.758351	N.D.	N.D.	NA	-2.48907	0.0150462	0.279282
SwissProt	Q9UBF8-2		Isoform 2 of Phosphatidylinositol 4-kinase beta OS=Homo sapiens OX=9606 GN=PI4KB	ENSG00000143393	PI4KB	0.002	-2.6025	-3.01387	0.161269	0.517104	0.395192	0.508203	-0.407595	0.39819	0.530222		-4.53799	N.D.	0.143283	N.D.	NA	1.84997	0.00294913	0.0253144
SwissProt	P14618		Pyruvate kinase PKM OS=Homo sapiens OX=9606 GN=PKM PE=1 SV=4	ENSG00000067225	PKM	0	8.6984	9.73797	0.102691	0.108764	0.000273084	0.0347406	1.03957	0.000273084	0.0320945	6.2672	7.36317	0.135586	0.0920739	0.000317456	0.0608023	1.09597	0.000317456	0.0577724
SwissProt	P14618-2		Isoform M1 of Pyruvate kinase PKM OS=Homo sapiens OX=9606 GN=PKM	ENSG00000067225	PKM	0	1.42028	1.82297	0.275515	0.717164	0.415293	0.658401	0.402698	0.415293	0.653144	-1.73652	-1.54742	0.743944	0.941042	0.798343	0.941705	0.189099	0.798343	0.944041
SwissProt	P29590		Protein PML OS=Homo sapiens OX=9606 GN=PML PE=1 SV=3	ENSG00000140464	PML	0	1.20911	1.13412	0.177112	0.347428	0.755829	0.874461	-0.0749833	0.755829	0.872097	4.18478	4.58917	0.418913	0.280727	0.237173	0.675064	0.404392	0.237173	0.67315
SwissProt	P29590-8		Isoform PML-2 of Protein PML OS=Homo sapiens OX=9606 GN=PML	ENSG00000140464	PML	0	-6.81225		0.397282	N.D.	N.D.	NA	0.689106	0.0285955	0.190253	-2.65272	-2.14203	0.556298	0.45705	0.286569	0.709704	0.510692	0.286569	0.707834
SwissProt	Q9BY77		Polymerase delta-interacting protein 3 OS=Homo sapiens OX=9606 GN=POLDIP3 PE=1 SV=2	ENSG00000100227	POLDIP3	0	1.25071	1.2199	0.352112	0.150367	0.895869	0.952877	-0.0308155	0.895869	0.951508	4.24457	3.67172	0.0537569	0.394457	0.0673159	0.460309	-0.572851	0.0673159	0.467639
SwissProt	Q9BY77-2		Isoform 2 of Polymerase delta-interacting protein 3 OS=Homo sapiens OX=9606 GN=POLDIP3	ENSG00000100227	POLDIP3	0		-4.02681	N.D.	N.D.	N.D.	NA	0.764157	0.467323	0.587877	-0.979585	-2.67938	0.282447	0.224995	0.0218296	0.0589381	-1.69783	0.0221025	0.0659099
RefSeq	O94913	NM_015972.3_1	RNA polymerase I subunit D (POLR1D), transcript variant 1, mRNA	ENSG00000186184	POLR1D	0	-2.09232	-2.32953	0.620931	0.329536	0.590278	0.769666	-0.237211	0.590278	0.767772	-0.51305	-0.810979	0.568799	0.295216	0.465828	0.873881	-0.297929	0.465828	0.861979
RefSeq		NM_152705.2_1	RNA polymerase I subunit D (POLR1D), transcript variant 2, mRNA	ENSG00000186184	POLR1D	0	-4.8592	-5.93533	0.0767979	0.76482	0.072382	0.305888	-1.07613	0.072382	0.322763	-0.117155	-0.968431	0.754327	0.214856	0.133298	0.644478	-0.851276	0.133298	0.671639
SwissProt	Q8NEY8		Periphilin-1 OS=Homo sapiens OX=9606 GN=PPHLN1 PE=1 SV=2	ENSG00000134283	PPHLN1	0			N.D.	N.D.	N.D.	NA	0.204654	0.249811	0.512864	-3.68286	-3.28599	0.68635	0.596064	0.555793	0.860655	-0.633556	0.605094	0.879852
SwissProt	Q8NEY8-2		Isoform 2 of Periphilin-1 OS=Homo sapiens OX=9606 GN=PPHLN1	ENSG00000134283	PPHLN1	0	-0.379768	-0.994954	0.137001	0.526075	0.121546	0.359255	-0.615186	0.121546	0.36478	3.13727	3.10751	0.529869	0.593142	0.95143	0.986228	-0.0297632	0.95143	0.985279
SwissProt	Q8NEY8-6		Isoform 6 of Periphilin-1 OS=Homo sapiens OX=9606 GN=PPHLN1	ENSG00000134283	PPHLN1	0		-2.82205	N.D.	N.D.	N.D.	NA	1.21111	0.317287	0.574368	-0.323183	-1.14717	0.157091	0.74038	0.263533	0.700508	-0.508803	0.863476	0.963383
SwissProt	P62937		Peptidyl-prolyl cis-trans isomerase A OS=Homo sapiens OX=9606 GN=PPIA PE=1 SV=2	ENSG00000196262	PPIA	0	8.16818	8.29994	0.0609109	0.217988	0.370349	0.622777	0.131762	0.370349	0.617208	5.93349	6.2195	0.512116	0.56163	0.550102	0.857951	0.286011	0.550102	0.857623
SwissProt	P62937-2		Isoform 2 of Peptidyl-prolyl cis-trans isomerase A OS=Homo sapiens OX=9606 GN=PPIA	ENSG00000196262	PPIA	0	3.81457	2.02598	0.811811	2.21535	0.259439	0.522574	-1.78859	0.259439	0.523063	0.333403	-0.0940813	1.27273	2.17862	0.783771	0.936383	-0.427484	0.783771	0.940755
SwissProt	Q13356		Peptidyl-prolyl cis-trans isomerase-like 2 OS=Homo sapiens OX=9606 GN=PPIL2 PE=1 SV=1	ENSG00000100023	PPIL2	0	-1.73873	-2.21948	0.698916	0.735156	0.457811	0.688026	-0.480753	0.457811	0.683218	0.596351	0.323171	0.198122	0.152376	0.131281	0.551926	-0.27318	0.131281	0.554336
SwissProt	Q13356-2		Isoform 2 of Peptidyl-prolyl cis-trans isomerase-like 2 OS=Homo sapiens OX=9606 GN=PPIL2	ENSG00000100023	PPIL2	0	-1.80981	-1.80209	0.795174	0.368551	0.991191	0.991595	0.0114984	0.986926	0.989896	0.248234	-0.629918	0.277182	0.124265	0.0549429	0.104177	-0.876186	0.0560835	0.117839
SwissProt	Q9Y570		Protein phosphatase methylesterase 1 OS=Homo sapiens OX=9606 GN=PPME1 PE=1 SV=3	ENSG00000214517	PPME1	0	2.44925	2.33158	0.214919	0.0240394	0.399313	0.646379	-0.117675	0.399313	0.640729	0.548125	0.553986	0.382014	0.332697	0.984973	0.995395	0.00586048	0.984973	0.996319
SwissProt	Q9Y570-4		Isoform 4 of Protein phosphatase methylesterase 1 OS=Homo sapiens OX=9606 GN=PPME1	ENSG00000214517	PPME1	0	1.26334	1.17808	0.155043	0.106136	0.586758	0.678289	-0.0814884	0.60427	0.705255	-2.05033	-1.45348	0.375383	0.589682	0.350661	0.424822	0.598818	0.351675	0.444713
SwissProt	O14974-4		Isoform 4 of Protein phosphatase 1 regulatory subunit 12A OS=Homo sapiens OX=9606 GN=PPP1R12A	ENSG00000058272	PPP1R12A	0	1.99595	1.61056	0.227346	0.306156	0.154932	0.406749	-0.385391	0.154932	0.411764	2.74224	3.13681	0.517847	1.0821	0.599357	0.876317	0.39457	0.599357	0.879045
SwissProt	O14974		Protein phosphatase 1 regulatory subunit 12A OS=Homo sapiens OX=9606 GN=PPP1R12A PE=1 SV=1	ENSG00000058272	PPP1R12A	0	1.32784	1.41962	0.0757805	0.0615827	0.315114	0.430317	0.0955604	0.297182	0.433283	-0.587361	-0.472391	0.109342	0.0314614	0.289219	0.365803	0.116937	0.290144	0.389844
SwissProt	Q15257		Serine/threonine-protein phosphatase 2A activator OS=Homo sapiens OX=9606 GN=PTPA PE=1 SV=3	ENSG00000119383	PPP2R4; PTPA	0	1.30292	1.67679	0.595327	0.555326	0.470911	0.69895	0.373868	0.470911	0.694438	-1.1584	-1.47335	0.39958	0.213577	0.294959	0.71591	-0.314951	0.294959	0.715471
SwissProt	Q15257-2		Isoform 1 of Serine/threonine-protein phosphatase 2A activator OS=Homo sapiens OX=9606 GN=PTPA	ENSG00000119383	PPP2R4; PTPA	0	1.98261	2.45187	0.0378034	0.0102455	0.00346523	0.0419817	0.473034	0.00307666	0.0402341	-0.740015	1.49676	3.3223	0.526953	0.446291	0.517745	2.23874	0.446148	0.531064
SwissProt	P42785		Lysosomal Pro-X carboxypeptidase OS=Homo sapiens OX=9606 GN=PRCP PE=1 SV=1	ENSG00000137509	PRCP	0	0.0282363	0.81135	0.207008	0.28342	0.0180746	0.152934	0.783114	0.0180746	0.157477	-3.14321	-3.10222	0.344936	0.984068	0.948984	0.985328	0.0409911	0.948984	0.985207
SwissProt	P42785-2		Isoform 2 of Lysosomal Pro-X carboxypeptidase OS=Homo sapiens OX=9606 GN=PRCP	ENSG00000137509	PRCP	0.001	-4.2298	-3.32057	N.D.	0.187709	N.D.	NA	1.58785	0.147941	0.273831			N.D.	N.D.	N.D.	NA	0.0311847	0.717612	0.770928
SwissProt	O75400		Pre-mRNA-processing factor 40 homolog A OS=Homo sapiens OX=9606 GN=PRPF40A PE=1 SV=2	ENSG00000196504	PRPF40A	0	2.59095	2.31666	0.203506	0.0863404	0.098082	0.324197	-0.274292	0.098082	0.332764	4.96059	4.83524	0.119109	0.140225	0.303334	0.721804	-0.125358	0.303334	0.722807
SwissProt	O75400-3		Isoform 3 of Pre-mRNA-processing factor 40 homolog A OS=Homo sapiens OX=9606 GN=PRPF40A	ENSG00000196504	PRPF40A	0			N.D.	N.D.	N.D.	NA	0.220957	0.22913	0.494088	-2.10543	-1.77997	0.691904	0.173765	0.584937	0.870569	0.23426	0.920123	0.978777
SwissProt	P79522		Proline-rich protein 3 OS=Homo sapiens OX=9606 GN=PRR3 PE=1 SV=2	ENSG00000228186	PRR3	0.002			N.D.	N.D.	N.D.	NA	0.138123	0.339499	0.594905	-1.73579	-2.247	0.796593	0.0613892	0.453162	0.819245	-1.9699	0.267274	0.696109
SwissProt	P79522-2		Isoform 2 of Proline-rich protein 3 OS=Homo sapiens OX=9606 GN=PRR3	ENSG00000228186	PRR3	0	-5.38248	-5.82288	0.739564	0.571418	0.573736	0.666794	-0.436622	0.575618	0.680477	0.316234	0.357766	0.302157	0.11656	0.872802	0.895125	0.0434987	0.867899	0.895112
SwissProt	Q96M27		Protein PRRC1 OS=Homo sapiens OX=9606 GN=PRRC1 PE=1 SV=1	ENSG00000164244	PRRC1	0	1.89913	2.52164	0.350054	0.251094	0.066563	0.263728	0.622512	0.066563	0.275224	-1.6398	-0.762648	2.00475	0.278325	0.494618	0.836422	0.877149	0.494618	0.836876
SwissProt	Q96M27-2		Isoform 2 of Protein PRRC1 OS=Homo sapiens OX=9606 GN=PRRC1	ENSG00000164244	PRRC1	0	0.665549	1.14808	0.0535967	0.147016	0.0487683	0.131739	0.486307	0.0484455	0.13954	-3.79639	-1.5433	2.60958	N.D.	N.D.	NA	-0.0732933	0.982541	0.985974
MAJIQ		ENSG00000135069:s:80932592-80932720_80932720-80942967_L1	phosphoserine aminotransferase 1 [Source:HGNC Symbol;Acc:HGNC:19129]	ENSG00000135069	PSAT1	0	3.57255	2.4963	0.274738	0.940274	0.129797	0.534044	0.637936	0.122021	0.629156	1.7777	1.14427	1.65022	1.36025	0.634968	0.983961	0.460384	0.523524	0.98075
MAJIQ		ENSG00000135069:s:80932592-80932720_80932720-80943897_S1	phosphoserine aminotransferase 1 [Source:HGNC Symbol;Acc:HGNC:19129]	ENSG00000135069	PSAT1	0	3.87018	2.47195	0.42586	0.696803	0.0413248	0.383086	0.912861	0.0491454	0.498981	-0.544982	-1.25645	0.530254	1.01586	0.342746	0.979485	0.210243	0.672516	0.988357
SwissProt	P28074		Proteasome subunit beta type-5 OS=Homo sapiens OX=9606 GN=PSMB5 PE=1 SV=3	ENSG00000100804	PSMB5	0	4.68834	3.95358	0.299782	0.364491	0.0542815	0.239022	-0.734766	0.0542815	0.249531	8.48179	6.36311	1.29368	4.91184	0.509988	0.83851	-2.11868	0.509988	0.840328
SwissProt	P28074-3		Isoform 3 of Proteasome subunit beta type-5 OS=Homo sapiens OX=9606 GN=PSMB5	ENSG00000100804	PSMB5	0		-2.90637	N.D.	0.405065	N.D.	NA	2.75376	0.0110046	0.0623062		-3.88764	N.D.	0.177222	N.D.	NA	2.39747	0.00337149	0.0268875
MAJIQ		ENSG00000100764:t:90730385-90730513_90729786-90730385_S2	proteasome 26S subunit, ATPase 1 [Source:HGNC Symbol;Acc:HGNC:9547]	ENSG00000100764	PSMC1	0	2.76432	2.21163	1.03436	0.55853	0.461152	0.734811	0.312307	0.19929	0.691044	-0.282977	0.850481	1.0584	1.86287	0.411355	0.979485	-0.401565	0.440322	0.98075
MAJIQ		ENSG00000100764:t:90730385-90730513_90730191-90730385_L1	proteasome 26S subunit, ATPase 1 [Source:HGNC Symbol;Acc:HGNC:9547]	ENSG00000100764	PSMC1	0	0.631776	0.53007	0.469766	1.03923	0.884725	0.956838	0.119877	0.716538	0.880365	-2.55741	-1.6482	1.35429	1.74244	0.514904	0.983961	0.403561	0.140555	0.98075
SwissProt	O00231-2		Isoform 2 of 26S proteasome non-ATPase regulatory subunit 11 OS=Homo sapiens OX=9606 GN=PSMD11	ENSG00000108671	PSMD11	0	4.39023	4.28034	0.165029	0.550169	0.756998	0.875182	-0.10989	0.756998	0.872856	2.4083	2.59576	0.353663	0.171207	0.455043	0.819245	0.187463	0.455043	0.822957
SwissProt	O00231		26S proteasome non-ATPase regulatory subunit 11 OS=Homo sapiens OX=9606 GN=PSMD11 PE=1 SV=3	ENSG00000108671	PSMD11	0	4.12323	3.97479	0.00867684	0.033811	0.0265514	0.0950328	-0.144667	0.0314298	0.110424	2.20116	2.64647	0.0962525	0.145698	0.0690192	0.121947	0.447279	0.0706479	0.137374
SwissProt	O00232		26S proteasome non-ATPase regulatory subunit 12 OS=Homo sapiens OX=9606 GN=PSMD12 PE=1 SV=3	ENSG00000197170	PSMD12	0	3.73307	3.56433	0.379227	0.174982	0.522609	0.735048	-0.168745	0.522609	0.730511	1.1179	1.89055	0.0941584	0.606652	0.0947568	0.500727	0.772648	0.0947568	0.505567
SwissProt	O00232-2		Isoform 2 of 26S proteasome non-ATPase regulatory subunit 12 OS=Homo sapiens OX=9606 GN=PSMD12	ENSG00000197170	PSMD12	0	-4.33907	-2.58604	0.0224633	0.00891517	9.50171e-05	0.0194416	1.75681	8.2161e-05	0.0177628	-5.4628	-4.23572	0.755707	2.27722	0.544668	0.613199	1.22905	0.543422	0.619473
SwissProt	P55036		26S proteasome non-ATPase regulatory subunit 4 OS=Homo sapiens OX=9606 GN=PSMD4 PE=1 SV=1	ENSG00000159352	PSMD4	0	3.05674	2.91731	0.232787	0.0896689	0.387818	0.63765	-0.139431	0.387818	0.631128	1.25967	1.10488	0.78771	0.449559	0.78223	0.936383	-0.154798	0.78223	0.940755
SwissProt	P55036-2		Isoform Rpn10E of 26S proteasome non-ATPase regulatory subunit 4 OS=Homo sapiens OX=9606 GN=PSMD4	ENSG00000159352	PSMD4	0	-3.73362	-3.46019	0.110602	0.148155	0.171594	0.280631	0.277215	0.168419	0.295676		-4.47284	N.D.	N.D.	N.D.	NA	1.02773	0.316011	0.411636
SwissProt	Q15008-4		Isoform 4 of 26S proteasome non-ATPase regulatory subunit 6 OS=Homo sapiens OX=9606 GN=PSMD6	ENSG00000163636	PSMD6	0	4.45777	3.71654	0.543782	0.295789	0.106746	0.338181	-0.741233	0.106746	0.346082	1.53821	1.72366	0.366092	0.20338	0.485857	0.831735	0.185449	0.485857	0.833616
SwissProt	Q15008		26S proteasome non-ATPase regulatory subunit 6 OS=Homo sapiens OX=9606 GN=PSMD6 PE=1 SV=1	ENSG00000163636	PSMD6	0	4.16796	4.03284	0.00624574	0.0592404	0.0849708	0.181617	-0.131346	0.0942997	0.206893	1.40571	2.04188	0.0713055	0.0487437	0.00909161	0.0366372	0.638131	0.00838015	0.0381713
SwissProt	Q9UKA9-4		Isoform 4 of Polypyrimidine tract-binding protein 2 OS=Homo sapiens OX=9606 GN=PTBP2	ENSG00000117569	PTBP2	0	-2.79096	-3.25962	1.49985	0.548502	0.637998	0.804993	-0.468659	0.637998	0.802865	0.911279	-0.36338	0.538202	1.47298	0.231947	0.667758	-1.27466	0.231947	0.667399
SwissProt	Q9UKA9-3		Isoform 3 of Polypyrimidine tract-binding protein 2 OS=Homo sapiens OX=9606 GN=PTBP2	ENSG00000117569	PTBP2	0	-4.5673	-4.58334	N.D.	1.41554	N.D.	NA	0.483925	0.707569	0.792543	-0.660718	-1.9496	0.060406	0.337722	0.0336494	0.076577	-1.28692	0.0345801	0.0872263
SwissProt	Q9UHX1-2		Isoform 2 of Poly(U)-binding-splicing factor PUF60 OS=Homo sapiens OX=9606 GN=PUF60	ENSG00000274081	PUF60	0	4.17258	4.22758	0.151048	0.25785	0.765844	0.880327	0.0550001	0.765844	0.877526	3.5923	3.45438	0.0968889	0.187155	0.320324	0.739654	-0.137922	0.320324	0.741918
SwissProt	Q9UHX1		Poly(U)-binding-splicing factor PUF60 OS=Homo sapiens OX=9606 GN=PUF60 PE=1 SV=1	ENSG00000274081	PUF60	0	3.48269	3.28576	0.0401632	0.074484	0.0812344	0.176511	-0.193151	0.079539	0.185864	3.34919	2.25146	0.14567	0.0230257	0.00890438	0.0365516	-1.09577	0.00890263	0.0395071
SwissProt	P20340-2		Isoform 2 of Ras-related protein Rab-6A OS=Homo sapiens OX=9606 GN=RAB6A	ENSG00000175582	RAB6A	0	2.07984	2.16386	0.496533	0.175962	0.796045	0.896806	0.0840182	0.796045	0.894918	0.0828302	0.63854	0.587149	0.38791	0.243193	0.681294	0.55571	0.243193	0.680046
SwissProt	P20340		Ras-related protein Rab-6A OS=Homo sapiens OX=9606 GN=RAB6A PE=1 SV=3	ENSG00000175582	RAB6A	0	1.30943	1.29973	0.0401157	0.113215	0.919526	0.943865	-0.00591994	0.951726	0.967214	-1.6968	0.0299464	1.04551	0.0860041	0.145356	0.211734	1.72872	0.145399	0.231532
SwissProt	Q5R372-3		Isoform 3 of Rab GTPase-activating protein 1-like OS=Homo sapiens OX=9606 GN=RABGAP1L	ENSG00000152061	RABGAP1L	0	-0.0297475	-1.1103	0.0364221	0.905991	0.107948	0.341271	-1.08055	0.107948	0.348548	-2.44253	-2.14149	0.773109	1.94923	0.815875	0.946627	0.301036	0.815875	0.950586
SwissProt	Q5R372-5		Isoform 5 of Rab GTPase-activating protein 1-like OS=Homo sapiens OX=9606 GN=RABGAP1L	ENSG00000152061	RABGAP1L	0	-3.45501	-4.34613	0.297611	0.136196	0.0613112	0.148887	-0.887344	0.0623577	0.160386	2.05985	2.60823	1.1124	0.0496607	0.558197	0.624844	0.55034	0.557316	0.631635
SwissProt	Q3YEC7		Rab-like protein 6 OS=Homo sapiens OX=9606 GN=RABL6 PE=1 SV=2	ENSG00000196642	RABL6	0	0.792361	0.516	0.266688	0.472949	0.427783	0.667387	-0.276362	0.427783	0.66259	-0.660224	-0.930091	0.708609	0.912779	0.706539	0.912446	-0.269866	0.706539	0.919263
SwissProt	Q3YEC7-2		Isoform 2 of Rab-like protein 6 OS=Homo sapiens OX=9606 GN=RABL6	ENSG00000196642	RABL6	0	0.549022	0.740304	0.216666	0.092342	0.369568	0.482324	0.195059	0.364924	0.499034	-0.225313	-0.202655	0.0042556	0.0113161	0.117742	0.18039	0.0246245	0.0456053	0.103265
SwissProt	Q9UKM9		RNA-binding protein Raly OS=Homo sapiens OX=9606 GN=RALY PE=1 SV=1	ENSG00000125970	RALY	0	-4.86785	-3.99719	N.D.	0.695767	N.D.	NA	1.17351	0.26961	0.532604	-2.70476	-0.854874	0.92542	1.46698	0.138422	0.561418	1.84989	0.138422	0.561469
SwissProt	Q9UKM9-2		Isoform 1 of RNA-binding protein Raly OS=Homo sapiens OX=9606 GN=RALY	ENSG00000125970	RALY	0	3.19866	2.60211	0.151031	0.698867	0.221942	0.483578	-0.59655	0.221942	0.486613	7.12951	7.66915	0.355914	0.217381	0.0885069	0.486692	0.539636	0.0885069	0.492856
SwissProt	Q9H6Z4		Ran-binding protein 3 OS=Homo sapiens OX=9606 GN=RANBP3 PE=1 SV=1	ENSG00000031823	RANBP3	0	2.57974	1.62707	0.347353	0.24225	0.0175944	0.150193	-0.952675	0.0175944	0.154873	0.864923	1.05378	1.57634	1.68908	0.894254	0.97137	0.188858	0.894254	0.970211
SwissProt	Q9H6Z4-2		Isoform 2 of Ran-binding protein 3 OS=Homo sapiens OX=9606 GN=RANBP3	ENSG00000031823	RANBP3	0	1.89955	1.97615	0.0884414	0.109077	0.521126	0.620337	0.0803784	0.510746	0.626118	-2.43874	-1.59781	1.21142	0.363521	0.446332	0.517745	0.842895	0.445514	0.530456
SwissProt	P52306		Rap1 GTPase-GDP dissociation stimulator 1 OS=Homo sapiens OX=9606 GN=RAP1GDS1 PE=1 SV=3	ENSG00000138698	RAP1GDS1	0	3.93195	3.61926	0.104577	0.489602	0.340195	0.599991	-0.312697	0.340195	0.594905	1.86114	1.97391	0.359484	0.408891	0.737916	0.921826	0.112768	0.737916	0.9285
SwissProt	P52306-4		Isoform 4 of Rap1 GTPase-GDP dissociation stimulator 1 OS=Homo sapiens OX=9606 GN=RAP1GDS1	ENSG00000138698	RAP1GDS1	0	5.50547	4.84768	0.166893	0.0390029	0.0323089	0.105682	-0.654007	0.0334417	0.113733	2.11923	2.73743	0.0728014	0.0797324	0.0149108	0.0476722	0.620174	0.0158845	0.0541504
SwissProt	P52306-5		Isoform 5 of Rap1 GTPase-GDP dissociation stimulator 1 OS=Homo sapiens OX=9606 GN=RAP1GDS1	ENSG00000138698	RAP1GDS1	0	-0.131771	-0.547125	0.0578706	0.161227	0.0755333	0.168327	-0.411577	0.0748981	0.179298	-4.21995	-3.595	N.D.	N.D.	N.D.	NA	0.51462	0.788839	0.832062
SwissProt	Q8WWW0-2		Isoform 2 of Ras association domain-containing protein 5 OS=Homo sapiens OX=9606 GN=RASSF5	ENSG00000266094	RASSF5	0	-2.95834	-0.346604	0.794472	0.319619	0.00615983	0.100353	2.61174	0.00615983	0.0992352	-3.14795	-2.20237	0.244437	0.799513	0.121695	0.540765	0.945586	0.121695	0.544019
SwissProt	Q8WWW0		Ras association domain-containing protein 5 OS=Homo sapiens OX=9606 GN=RASSF5 PE=1 SV=1	ENSG00000266094	RASSF5	0	-2.91354	-1.45446	N.D.	0.0982682	N.D.	NA	2.8663	0.178519	0.30586	-4.44611	-5.29965	N.D.	N.D.	N.D.	NA	-0.387867	0.747429	0.795032
SwissProt	Q09028		Histone-binding protein RBBP4 OS=Homo sapiens OX=9606 GN=RBBP4 PE=1 SV=3	ENSG00000162521	RBBP4	0	2.18702	-0.342544	0.688078	3.25827	0.258626	0.521375	-2.52957	0.258626	0.522042	2.7768	1.36951	1.42579	3.2485	0.529795	0.848695	-1.40729	0.529795	0.849021
SwissProt	Q09028-2		Isoform 2 of Histone-binding protein RBBP4 OS=Homo sapiens OX=9606 GN=RBBP4	ENSG00000162521	RBBP4	0	5.28144	4.92423	0.0983334	0.26169	0.0913007	0.311724	-0.357212	0.0913007	0.321078	6.62758	6.25281	0.252064	0.121067	0.0810149	0.477259	-0.374773	0.0810149	0.484859
SwissProt	P98175-5		Isoform 5 of RNA-binding protein 10 OS=Homo sapiens OX=9606 GN=RBM10	ENSG00000182872	RBM10	0	1.89043	2.94426	0.627086	1.22557	0.255533	0.518116	1.05384	0.255533	0.51907	4.37381	4.16386	0.101384	0.319772	0.339314	0.746855	-0.209956	0.339314	0.749271
SwissProt	P98175-3		Isoform 3 of RNA-binding protein 10 OS=Homo sapiens OX=9606 GN=RBM10	ENSG00000182872	RBM10	0		-4.73728	N.D.	N.D.	N.D.	NA	0.28671	0.642254	0.7376	-2.93615	-3.55944	0.0927482	0.332776	0.125357	0.189464	-0.621329	0.128664	0.211932
SwissProt	P38159		RNA-binding motif protein, X chromosome OS=Homo sapiens OX=9606 GN=RBMX PE=1 SV=3	ENSG00000147274	RBMX	0	3.13545	2.52771	0.239924	0.554657	0.156501	0.408024	-0.607739	0.156501	0.413212	8.09737	8.17091	0.619261	0.625659	0.891949	0.970909	0.0735403	0.891949	0.969543
SwissProt	P38159-2		Isoform 2 of RNA-binding motif protein, X chromosome OS=Homo sapiens OX=9606 GN=RBMX	ENSG00000147274	RBMX	0	1.38348	2.41117	0.182894	0.0656764	0.0174125	0.0744835	1.03147	0.0167822	0.0763016	7.39594	7.75909	0.045542	0.0607139	0.0211489	0.0579716	0.365117	0.0225097	0.0665713
SwissProt	P62899		60S ribosomal protein L31 OS=Homo sapiens OX=9606 GN=RPL31 PE=1 SV=1	ENSG00000071082	RPL31	0	4.99727	4.53457	0.340968	0.188486	0.108816	0.342142	-0.462702	0.108816	0.349079	6.69734	5.73535	0.0895106	0.188702	0.00133796	0.116041	-0.961985	0.00133796	0.115109
SwissProt	P62899-2		Isoform 2 of 60S ribosomal protein L31 OS=Homo sapiens OX=9606 GN=RPL31	ENSG00000071082	RPL31	0	3.45145	3.99014	0.143938	0.0947182	0.047538	0.130367	0.542468	0.045407	0.134105	7.11522	6.29511	0.035664	0.0887047	0.00672665	0.0324163	-0.818138	0.00727979	0.0359732
SwissProt	P62847		40S ribosomal protein S24 OS=Homo sapiens OX=9606 GN=RPS24 PE=1 SV=1	ENSG00000138326	RPS24	0	3.24696	3.21268	0.515066	0.321059	0.926771	0.966356	-0.034282	0.926771	0.966173	4.38633	3.89073	0.0325428	0.0672171	0.000327035	0.0608023	-0.495605	0.000327035	0.0577724
SwissProt	P62847-4		Isoform 4 of 40S ribosomal protein S24 OS=Homo sapiens OX=9606 GN=RPS24	ENSG00000138326	RPS24	0	1.3726	1.55009	0.254316	0.00936058	0.427946	0.53701	0.181268	0.415885	0.545524	4.62617	4.18025	0.0650666	0.054229	0.0175667	0.0520756	-0.443949	0.0169617	0.0563027
SwissProt	O00442		RNA 3'-terminal phosphate cyclase OS=Homo sapiens OX=9606 GN=RTCA PE=1 SV=1	ENSG00000137996	RTCA	0	1.93396	1.67309	0.629792	0.474039	0.597192	0.780533	-0.260865	0.597192	0.777686	0.341653	0.0833444	1.17044	0.644376	0.754556	0.926604	-0.258308	0.754556	0.931495
SwissProt	O00442-2		Isoform 2 of RNA 3'-terminal phosphate cyclase OS=Homo sapiens OX=9606 GN=RTCA	ENSG00000137996	RTCA	0	0.0131369	0.139284	0.24964	0.182655	0.622383	0.707699	0.129924	0.609528	0.710621	-2.42136	-0.348062	1.04063	0.173171	0.108739	0.170621	2.07527	0.108267	0.186908
SwissProt	Q9NQC3		Reticulon-4 OS=Homo sapiens OX=9606 GN=RTN4 PE=1 SV=2	ENSG00000115310	RTN4	0	2.89535	2.76234	0.14257	0.380245	0.600816	0.782738	-0.133015	0.600816	0.780026	-0.931518	0.612052	0.732693	0.382965	0.0318596	0.351951	1.54357	0.0318596	0.364539
SwissProt	Q9NQC3-2		Isoform 2 of Reticulon-4 OS=Homo sapiens OX=9606 GN=RTN4	ENSG00000115310	RTN4	0	2.725	2.70332	0.240134	0.0092373	0.910144	0.937551	-0.0179038	0.926462	0.951277	-1.14948	-0.555951	0.0173936	0.0204718	0.00102267	0.0185241	0.595494	0.00124172	0.0188431
MAJIQ		ENSG00000166788:t:18104762-18105278_18105275-18108413_S2	serum amyloid A like 1 [Source:HGNC Symbol;Acc:HGNC:25158]	ENSG00000166788	SAAL1	0	1.03837	0.157994	0.823954	0.361713	0.165406	0.570129	-2.00875	0.411435	0.566845	-3.25308	-1.09198	2.00291	1.02541	0.171542	0.941902	0.314234	0.185998	0.314207
MAJIQ		ENSG00000166788:t:18104762-18105278_18105278-18108413_L2	ENSG00000166788:t:18104762-18105278 OS=Homo sapiens GN=ENSG00000166788	ENSG00000166788	SAAL1	0	-0.137679	-1.25686	0.647298	0.477355	0.18794	0.332781	-0.0661848	0.699359	0.814475	-2.85514	-2.82898	0.0221877	0.244165	0.893918	0.920091	0.235983	0.0469652	0.125114
MAJIQ		ENSG00000138674:s:83784364-83784545_83778917-83784471_S0	ENSG00000138674:s:83784364-83784545 OS=Homo sapiens GN=ENSG00000138674	ENSG00000138674	SEC31A	0	0.613017	0.24206	0.292136	0.0507507	0.21887	0.364267	4.50103	0.000552287	0.0302837	-1.77455	-1.65403	0.168223	0.216419	0.597496	0.661152	2.24474	0.346611	0.485256
MAJIQ		ENSG00000138674:s:83784364-83784545_83783725-83784471_L0	SEC31 homolog A, COPII coat complex component [Source:HGNC Symbol;Acc:HGNC:17052]	ENSG00000138674	SEC31A	0	2.51049	3.02659	0.81766	1.43374	0.61685	0.835469	0.0200387	0.929366	0.960005	3.04299	1.50168	2.16586	2.49085	0.463997	0.983961	-0.635663	0.149458	0.270918
SwissProt	Q8NC51		Plasminogen activator inhibitor 1 RNA-binding protein OS=Homo sapiens OX=9606 GN=SERBP1 PE=1 SV=2	ENSG00000142864	SERBP1	0	2.8425	1.10688	0.634637	1.98061	0.221862	0.483578	-1.73562	0.221862	0.486613	1.44593	0.412544	0.775239	1.23808	0.287676	0.709704	-1.03338	0.287676	0.708168
SwissProt	Q8NC51-2		Isoform 2 of Plasminogen activator inhibitor 1 RNA-binding protein OS=Homo sapiens OX=9606 GN=SERBP1	ENSG00000142864	SERBP1	0	-4.77884	-3.19813	2.24975	0.523231	0.435238	0.672805	1.08451	0.476606	0.699613			N.D.	N.D.	N.D.	NA	0.329063	0.0308658	0.358561
SwissProt	Q8NC51-3		Isoform 3 of Plasminogen activator inhibitor 1 RNA-binding protein OS=Homo sapiens OX=9606 GN=SERBP1	ENSG00000142864	SERBP1	0	5.71978	4.50243	0.414345	0.837073	0.0869202	0.30381	-1.21736	0.0869202	0.313366	6.62511	5.43003	0.817493	0.951401	0.174254	0.618147	-1.19507	0.174254	0.617283
MAJIQ		ENSG00000061936:s:132241018-132241189_132241189-132249001_L0	ENSG00000061936:s:132241018-132241189 OS=Homo sapiens GN=ENSG00000061936	ENSG00000061936	SFSWAP	0		-3.13799		0.27257		NA	0.407545	0.844736	0.938873	-1.8296	-1.80606	0.0213986	0.204713	0.886401	0.914413	0.0943745	0.635684	0.982296
MAJIQ		ENSG00000061936:s:132241018-132241189_132241189-132250663_S0	splicing factor SWAP [Source:HGNC Symbol;Acc:HGNC:10790]	ENSG00000061936	SFSWAP	0.001	-1.92335	-2.20483	0.464027	0.993267	0.679534	0.858506	1.29961	0.224938	0.691044	-0.985778	-0.848929	1.15223	0.910882	0.879619	0.987205	1.33295	0.272272	0.98075
SwissProt	Q9NR46		Endophilin-B2 OS=Homo sapiens OX=9606 GN=SH3GLB2 PE=1 SV=1	ENSG00000148341	SH3GLB2	0	1.00455	0.48643	0.439587	0.244959	0.149109	0.400488	-0.518123	0.149109	0.405553	-3.19785	-2.97914	1.74733	0.808256	0.853599	0.959499	0.218717	0.853599	0.960471
SwissProt	Q9NR46-2		Isoform 2 of Endophilin-B2 OS=Homo sapiens OX=9606 GN=SH3GLB2	ENSG00000148341	SH3GLB2	0	1.70093	1.5592	0.0762959	0.0346995	0.139243	0.245844	-0.137957	0.153601	0.280979	1.39713	-0.0610895	0.010605	0.158266	0.00586425	0.0301817	-1.45625	0.00620619	0.0333863
SwissProt	Q00325-2		Isoform B of Phosphate carrier protein, mitochondrial OS=Homo sapiens OX=9606 GN=SLC25A3	ENSG00000075415	SLC25A3	0	5.50721	5.50722	0.327423	0.236625	0.999967	0.999967	1.0351e-05	0.999967	0.999967	2.49661	2.68379	0.141708	0.351991	0.441032	0.811025	0.187177	0.441032	0.815517
SwissProt	Q00325		Phosphate carrier protein, mitochondrial OS=Homo sapiens OX=9606 GN=SLC25A3 PE=1 SV=2	ENSG00000075415	SLC25A3	0	4.06596	3.21853	0.0482151	0.0177128	0.00183196	0.0353251	-0.843652	0.00206609	0.0350502	1.76585	4.93489	0.022269	0.0343873	8.35519e-05	0.0111158	3.171	0.000101485	0.011748
MAJIQ		ENSG00000137776:t:59191990-59192136_59192082-59193459_S0	SAFB like transcription modulator [Source:HGNC Symbol;Acc:HGNC:20709]	ENSG00000137776	SLTM	0	-3.42198					NA	-0.904052	0.0633324	0.192929	-2.47449	-1.42872	0.940164			NA	1.15667	0.00881552	0.0551154
MAJIQ		ENSG00000137776:t:59191990-59192136_59192136-59193459_L0	SAFB like transcription modulator [Source:HGNC Symbol;Acc:HGNC:20709]	ENSG00000137776	SLTM	0						NA	0.0845974	0.928876	0.960005	-1.49801	-0.719792	1.64723	1.13239	0.566155	0.983961	-1.69928	0.63105	0.717152
SwissProt	Q12824		SWI/SNF-related matrix-associated actin-dependent regulator of chromatin subfamily B member 1 OS=Homo sapiens OX=9606 GN=SMARCB1 PE=1 SV=2	ENSG00000099956	SMARCB1	0	0.357159	0.283768	0.446386	0.808042	0.897131	0.953896	-0.0733911	0.897131	0.952539	3.63253	3.29366	0.559431	0.537078	0.491281	0.834602	-0.338866	0.491281	0.835171
SwissProt	Q12824-2		Isoform B of SWI/SNF-related matrix-associated actin-dependent regulator of chromatin subfamily B member 1 OS=Homo sapiens OX=9606 GN=SMARCB1	ENSG00000099956	SMARCB1	0	-6.61703	-3.56014	1.37701	1.33125	0.0887496	0.307742	2.84435	0.0434484	0.225037	-0.886039	-1.10188	0.474281	0.789277	0.705531	0.912299	-0.215837	0.705531	0.919116
MAJIQ		ENSG00000066117:s:50480539-50480700_50480661-50481146_L0	ENSG00000066117:s:50480539-50480700 OS=Homo sapiens GN=ENSG00000066117	ENSG00000066117	SMARCD1	0	-3.0079	-2.28988	0.297488	0.329784	0.149545	0.282874	-2.17348	0.126991	0.629156	2.46255	1.14098	0.0902549	0.0204246	0.00244247	0.0398646	-3.62928	0.130888	0.98075
MAJIQ		ENSG00000066117:s:50480539-50480700_50480661-50482304_S0	SWI/SNF related, matrix associated, actin dependent regulator of chromatin, subfamily d, member 1 [Source:HGNC Symbol;Acc:HGNC:11106]	ENSG00000066117	SMARCD1	0	-0.0319776	0.708519	0.92266	0.328296	0.260468	0.618907	-1.08209	0.365649	0.711646	2.9092	3.05661	0.625655	0.290213	0.730005	0.983961	-0.00436386	0.998003	0.998459
SwissProt	Q9NXE4-2		Isoform 2 of Sphingomyelin phosphodiesterase 4 OS=Homo sapiens OX=9606 GN=SMPD4	ENSG00000136699	SMPD4	0	-3.62405	-2.23164	0.767984	0.491483	0.0572764	0.246666	1.39241	0.0572764	0.25719	-3.23129	-1.58068	2.96415	0.292828	0.510177	0.83851	3.57494e-05	0.999989	0.999989
SwissProt	Q9NXE4-4		Isoform 4 of Sphingomyelin phosphodiesterase 4 OS=Homo sapiens OX=9606 GN=SMPD4	ENSG00000136699	SMPD4	0	1.43802	0.833664	0.321486	0.82954	0.30459	0.564978	-0.604359	0.30459	0.562311	3.23004	2.97038	0.305873	0.477378	0.472031	0.825922	-0.259659	0.472031	0.829242
SwissProt	P18583-3		Isoform B of Protein SON OS=Homo sapiens OX=9606 GN=SON	ENSG00000159140	SON	0	-5.94095		0.0554521	N.D.	N.D.	NA	-0.0248184	0.772063	0.881007	-2.05191	-1.74233	1.21439	0.879197	0.738679	0.922208	0.309577	0.738679	0.928879
SwissProt	P18583-5		Isoform D of Protein SON OS=Homo sapiens OX=9606 GN=SON	ENSG00000159140	SON	0	3.82024	2.22256	1.329	1.34378	0.216993	0.479443	-1.59768	0.216993	0.482884	5.6364	5.41897	0.623176	0.475129	0.655918	0.893525	-0.217432	0.655918	0.900069
SwissProt	P18583-9		Isoform I of Protein SON OS=Homo sapiens OX=9606 GN=SON	ENSG00000159140	SON	0	1.27746	1.80486	0.0349696	0.0280018	0.00358835	0.0429088	0.531174	0.00339855	0.0417694	3.65439	3.10258	0.00332256	0.00303985	3.32994e-05	0.0111158	-0.549844	9.82383e-05	0.011748
MAJIQ		ENSG00000259479:s:45139596-45139760_45131728-45139596_L2	sorbitol dehydrogenase 2, pseudogene [Source:HGNC Symbol;Acc:HGNC:49919]	ENSG00000259479	SORD2P	0	4.28541	2.8662	0.974802	0.840779	0.128815	0.534044	2.71395	0.0105399	0.0829609	-0.678103	-0.655839	0.451731	0.636705	0.962971	0.989123	1.9253	0.0563375	0.137807
MAJIQ		ENSG00000259479:t:45127380-45127498_45127498-45131569_L2	sorbitol dehydrogenase 2, pseudogene [Source:HGNC Symbol;Acc:HGNC:49919]	ENSG00000259479	SORD2P	0	3.39872	1.57475	0.233583	1.71832	0.142579	0.553991	0.137513	0.213922	0.399887	-1.78423	-3.41728	1.12068	0.973993	0.179344	0.946137	0.385057	0.147611	0.269671
SwissProt	Q9HB58-7		Isoform 7 of Sp110 nuclear body protein OS=Homo sapiens OX=9606 GN=SP110	ENSG00000135899	SP110	0	-1.72072	-2.15682	0.568715	0.182172	0.274598	0.537126	-0.436095	0.274598	0.536116	2.10409	2.84565	0.400297	0.215293	0.0475431	0.414597	0.741562	0.0475431	0.42581
SwissProt	Q9HB58-6		Isoform 6 of Sp110 nuclear body protein OS=Homo sapiens OX=9606 GN=SP110	ENSG00000135899	SP110	0	-1.87313	-3.63628	0.261247	0.501937	0.047834	0.130983	-1.75938	0.0479875	0.138964	1.16841	2.04565	0.151974	0.0202565	0.0149315	0.0476722	0.879214	0.0149643	0.0527237
MAJIQ		ENSG00000185404:t:231256802-231256944_231253348-231256802_S2	ENSG00000185404:t:231256802-231256944 OS=Homo sapiens GN=ENSG00000185404	ENSG00000185404	SP140L	0						NA	-0.473187	0.0331825	0.139962	-3.60667	-2.16823	0.5575	0.00584909	0.0675873	0.134879	1.75182	0.174789	0.304262
MAJIQ		ENSG00000185404:t:231256802-231256944_231254738-231256802_L2	SP140 nuclear body protein like [Source:HGNC Symbol;Acc:HGNC:25105]	ENSG00000185404	SP140L	0	-3.88739	-3.9148				NA	-1.43884	0.132468	0.285782	-3.788	-4.44206	2.05068	2.90861	0.782284	0.983961	-0.049187	0.529751	0.625045
SwissProt	Q13813		Spectrin alpha chain, non-erythrocytic 1 OS=Homo sapiens OX=9606 GN=SPTAN1 PE=1 SV=3	ENSG00000197694	SPTAN1	0	-0.859778	-1.69776	0.121746	1.09297	0.257365	0.51967	-0.837984	0.257365	0.520501	-0.339024	-1.45766	0.776655	1.32188	0.274948	0.706964	-1.11864	0.274948	0.703219
SwissProt	Q13813-2		Isoform 2 of Spectrin alpha chain, non-erythrocytic 1 OS=Homo sapiens OX=9606 GN=SPTAN1	ENSG00000197694	SPTAN1	0	5.95393	6.55483	0.0839237	0.175792	0.00591348	0.0999156	0.600903	0.00591348	0.0988736	6.79048	6.45465	0.265193	0.385577	0.281755	0.70913	-0.335834	0.281755	0.706798
RefSeq		NM_001281303.1_2	serine palmitoyltransferase long chain base subunit 1 (SPTLC1), transcript variant 3, mRNA	ENSG00000090054	SPTLC1	0	1.44831	1.15898	0.337439	0.424568	0.407751	0.646448	-0.289339	0.407751	0.640556	1.34799	1.15616	0.792434	0.491442	0.739598	0.959334	-0.191828	0.739598	0.956322
RefSeq	Q13561	NM_006415.3_2	Homo sapiens serine palmitoyltransferase long chain base subunit 1 (SPTLC1), transcript variant 1, mRNA	ENSG00000090054	SPTLC1	0	-0.141622	-0.013138	0.276835	0.0629267	0.587687	0.67584	0.128484	0.587687	0.67886	-3.90216	-2.16908		0.735709		NA	2.93951	0.154703	0.225492
SwissProt	Q96SB4		SRSF protein kinase 1 OS=Homo sapiens OX=9606 GN=SRPK1 PE=1 SV=2	ENSG00000096063	SRPK1	0	2.52847	1.72911	0.461104	0.679206	0.166972	0.422574	-0.799359	0.166972	0.42642	3.08217	2.15872	0.410473	0.765798	0.139459	0.563658	-0.923453	0.139459	0.563446
SwissProt	Q96SB4-3		Isoform 1 of SRSF protein kinase 1 OS=Homo sapiens OX=9606 GN=SRPK1	ENSG00000096063	SRPK1	0	0.575082	0.0423746	0.0860969	0.0353537	0.0149222	0.068698	-0.52893	0.0142022	0.0702984	4.22747	3.0355	0.00337394	0.053214	0.000999031	0.0185241	-1.19001	0.00116862	0.0186599
MAJIQ		ENSG00000133226:t:24987801-24987896_24987290-24987801_L2	serine and arginine repetitive matrix 1 [Source:HGNC Symbol;Acc:HGNC:16638]	ENSG00000133226	SRRM1	0	1.8006	0.263816	1.34129	1.42215	0.306386	0.646211	1.67774	0.0597492	0.526913	2.98082	3.38187	1.52365	0.165539	0.748038	0.983961	1.10179	0.170762	0.98075
MAJIQ		ENSG00000133226:t:24987801-24987896_24987290-24987804_S2	ENSG00000133226:t:24987801-24987896 OS=Homo sapiens GN=ENSG00000133226	ENSG00000133226	SRRM1	0	-2.24639					NA	0.124259	0.826217	0.928332	0.688232	0.625519	0.283462	0.0896686	0.793604	0.835833	0.278738	0.607818	0.982296
SwissProt	O95793		Double-stranded RNA-binding protein Staufen homolog 1 OS=Homo sapiens OX=9606 GN=STAU1 PE=1 SV=2	ENSG00000124214	STAU1	0	1.97044	2.17881	0.100596	0.503582	0.520946	0.733568	0.208362	0.520946	0.729182	3.74039	3.32613	0.4458	0.925937	0.523513	0.844305	-0.414258	0.523513	0.845243
SwissProt	O95793-3		Isoform 3 of Double-stranded RNA-binding protein Staufen homolog 1 OS=Homo sapiens OX=9606 GN=STAU1	ENSG00000124214	STAU1	0	-5.34512	-5.1814	N.D.	1.40595	N.D.	NA	0.608757	0.512907	0.723859	-3.99412	-4.1755	1.13282	1.17908	0.873654	0.966143	-0.966294	0.440453	0.815188
SwissProt	P31948		Stress-induced-phosphoprotein 1 OS=Homo sapiens OX=9606 GN=STIP1 PE=1 SV=1	ENSG00000168439	STIP1	0	7.10066	6.61274	0.354339	0.28359	0.136069	0.381309	-0.487927	0.136069	0.386622	4.84514	4.93427	0.206336	0.145456	0.573875	0.8669	0.0891378	0.573875	0.868296
SwissProt	P31948-2		Isoform 2 of Stress-induced-phosphoprotein 1 OS=Homo sapiens OX=9606 GN=STIP1	ENSG00000168439	STIP1	0	6.93311	6.72818	0.101329	0.000952208	0.1036	0.205527	-0.201155	0.111538	0.229881	3.88828	4.84074	0.0164247	0.00499256	0.000162384	0.0128187	0.954429	0.000177593	0.011748
SwissProt	P16949		Stathmin OS=Homo sapiens OX=9606 GN=STMN1 PE=1 SV=3	ENSG00000117632	STMN1	0	4.8495	3.62597	0.358365	1.29357	0.189522	0.44825	-1.22354	0.189522	0.452012	1.61333	0.997675	1.26563	1.84352	0.65834	0.896037	-0.615656	0.65834	0.901993
SwissProt	P16949-2		Isoform 2 of Stathmin OS=Homo sapiens OX=9606 GN=STMN1	ENSG00000117632	STMN1	0	6.277	6.02339	0.00995716	0.0111154	0.00172665	0.0349585	-0.249838	0.0019717	0.0344933	2.907	3.61912	0.0101337	0.0398031	0.00165918	0.0204529	0.714085	0.0013132	0.0191476
SwissProt	Q13033-2		Isoform Alpha of Striatin-3 OS=Homo sapiens OX=9606 GN=STRN3	ENSG00000196792	STRN3	0	0.270678	-0.34088	0.171528	0.728954	0.230128	0.492209	-0.611558	0.230128	0.494939	1.52651	1.65109	0.693047	0.707368	0.838169	0.953105	0.124586	0.838169	0.956414
SwissProt	Q13033		Striatin-3 OS=Homo sapiens OX=9606 GN=STRN3 PE=1 SV=3	ENSG00000196792	STRN3	0	-0.281875	0.0200137	0.0448358	0.176517	0.143747	0.249844	0.305666	0.143642	0.26783	-0.824291	-1.20155	0.0734621	0.396959	0.317229	0.391921	-0.375287	0.315456	0.411161
SwissProt	Q9Y2Z0		Protein SGT1 homolog OS=Homo sapiens OX=9606 GN=SUGT1 PE=1 SV=3	ENSG00000165416	SUGT1	0	4.04659	3.48998	0.376079	0.124004	0.0716242	0.274941	-0.556618	0.0716242	0.286889	1.3054	1.73887	0.215051	0.377216	0.158854	0.592104	0.433465	0.158854	0.592292
SwissProt	Q9Y2Z0-2		Isoform 2 of Protein SGT1 homolog OS=Homo sapiens OX=9606 GN=SUGT1	ENSG00000165416	SUGT1	0	-4.05917	-7.29335	0.865381	N.D.	N.D.	NA	-1.79776	0.0924561	0.322652	-4.40566	-3.7508	0.703366	0.432927	0.378713	0.77544	0.419332	0.73808	0.9285
MAJIQ		ENSG00000133789:s:9715693-9715833_9715833-9735013_L0	switching B cell complex subunit SWAP70 [Source:HGNC Symbol;Acc:HGNC:17070]	ENSG00000133789	SWAP70	0	-2.01195	-3.14804	1.69729	1.40315	0.469605	0.74032	-1.86219	0.131021	0.629156	-2.645	-3.5808	0.138906	1.83325	0.543146	0.983961	0.889319	0.41019	0.98075
MAJIQ		ENSG00000133789:s:9715693-9715833_9715833-9746205_S0	switching B cell complex subunit SWAP70 [Source:HGNC Symbol;Acc:HGNC:17070]	ENSG00000133789	SWAP70	0	0.196235	-2.25087	0.243411	1.28543	0.0316803	0.36097	-1.23041	0.215495	0.691044	-2.18528	-3.21803	0.883177	1.45072	0.351661	0.979485	-1.12705	0.480261	0.98075
RefSeq		NM_001159675.1_3	synaptotagmin binding cytoplasmic RNA interacting protein (SYNCRIP), transcript variant 4, mRNA	ENSG00000135316	SYNCRIP	0	3.89972	3.36768	0.424825	0.478597	0.22329	0.494203	-0.532037	0.22329	0.501228	6.1811	5.87564	0.258646	0.342411	0.285111	0.784612	-0.305458	0.285111	0.792236
RefSeq	O60506	NM_001159676.1_3	synaptotagmin binding cytoplasmic RNA interacting protein (SYNCRIP), transcript variant 5, mRNA	ENSG00000135316	SYNCRIP	0	-4.38464	-5.86815	0.356883	0.577186	0.0349729	0.227634	-1.57163	0.00844263	0.142514	-1.7544	-2.37285	0.604954	0.556606	0.262504	0.771769	-0.61845	0.262504	0.773349
SwissProt	Q96BW9-3		Isoform 3 of Phosphatidate cytidylyltransferase, mitochondrial OS=Homo sapiens OX=9606 GN=TAMM41	ENSG00000144559	TAMM41	0	-1.93839	-1.85825	0.369018	0.591719	0.851935	0.928807	0.0801394	0.851935	0.927623	-3.18408	-2.58517	2.38754	0.73346	0.699216	0.911794	0.598907	0.699216	0.918099
SwissProt	Q96BW9		Phosphatidate cytidylyltransferase, mitochondrial OS=Homo sapiens OX=9606 GN=TAMM41 PE=1 SV=2	ENSG00000144559	TAMM41	0.001	-2.35754	-2.48155	N.D.	0.243738	N.D.	NA	1.58958	0.452994	0.577301		-4.44083	N.D.	N.D.	N.D.	NA	1.00513	0.336976	0.43087
SwissProt	Q8TC07		TBC1 domain family member 15 OS=Homo sapiens OX=9606 GN=TBC1D15 PE=1 SV=2	ENSG00000121749	TBC1D15	0	1.53236	1.75609	0.382738	0.576805	0.605493	0.785637	0.223724	0.605493	0.782528	-0.0875125	0.327506	0.800551	0.881523	0.578628	0.868695	0.415019	0.578628	0.870475
SwissProt	Q8TC07-3		Isoform 3 of TBC1 domain family member 15 OS=Homo sapiens OX=9606 GN=TBC1D15	ENSG00000121749	TBC1D15	0	-1.70739	-1.86928	0.183883	0.380881	0.642518	0.724998	-0.158116	0.651673	0.745424	-4.97762	-4.44516	0.422239	0.532973	0.383458	0.455716	0.534435	0.379783	0.469129
SwissProt	Q15813-2		Isoform 2 of Tubulin-specific chaperone E OS=Homo sapiens OX=9606 GN=TBCE	ENSG00000282984	TBCE	0	1.42434	1.5553	0.0388128	0.49283	0.67016	0.82297	0.130967	0.67016	0.821048	0.920419	0.333257	0.257238	0.314343	0.0664964	0.457989	-0.587161	0.0664964	0.464479
SwissProt	Q15813		Tubulin-specific chaperone E OS=Homo sapiens OX=9606 GN=TBCE PE=1 SV=1	ENSG00000282984	TBCE	0	0.867047	0.873725	0.386795	0.00359601	0.982738	0.98595	0.0104557	0.973155	0.97952	-2.14181	-1.34332	0.299128	0.346718	0.132524	0.19763	0.800461	0.133218	0.217438
MAJIQ		ENSG00000187735:s:54934623-54934825_54912610-54934623_S2	transcription elongation factor A1 [Source:HGNC Symbol;Acc:HGNC:11612]	ENSG00000187735	TCEA1	0	1.05774	0.295367	0.452845	0.277696	0.129964	0.534044	0.777876	0.0222708	0.109006	-0.734834	-0.688597	1.17952	0.0716081	0.961399	0.989123	-2.35814	0.248317	0.386718
MAJIQ		ENSG00000187735:s:54934623-54934825_54923052-54934623_L2	transcription elongation factor A1 [Source:HGNC Symbol;Acc:HGNC:11612]	ENSG00000187735	TCEA1	0	0.941121	0.801901	0.779852	0.432435	0.80022	0.907639	0.118715	0.228704	0.40816	0.204576	-0.93645	0.304636	0.779068	0.0774455	0.904948	-0.184278	0.145059	0.267828
SwissProt	Q13428-3		Isoform 3 of Treacle protein OS=Homo sapiens OX=9606 GN=TCOF1	ENSG00000070814	TCOF1	0	3.37551	2.07286	0.329414	1.00383	0.0995779	0.326728	-1.30265	0.0995779	0.33482	5.98954	5.79411	0.556288	0.648687	0.712241	0.914799	-0.195433	0.712241	0.920764
SwissProt	Q13428-7		Isoform 7 of Treacle protein OS=Homo sapiens OX=9606 GN=TCOF1	ENSG00000070814	TCOF1	0	-5.76768		N.D.	N.D.	N.D.	NA	-0.0385973	0.87858	0.940837	-3.12202	-2.92165	0.421434	1.25186	0.805719	0.942321	0.20038	0.805719	0.945683
SwissProt	O95551		Tyrosyl-DNA phosphodiesterase 2 OS=Homo sapiens OX=9606 GN=TDP2 PE=1 SV=1	ENSG00000111802	TDP2	0	0.161753	-0.86171	0.217096	0.664242	0.0642059	0.258005	-1.02346	0.0642059	0.269612	-2.71171	-2.58963	0.879963	0.679402	0.858419	0.960407	0.122076	0.858419	0.961092
SwissProt	O95551-2		Isoform 2 of Tyrosyl-DNA phosphodiesterase 2 OS=Homo sapiens OX=9606 GN=TDP2	ENSG00000111802	TDP2	0	-1.17804	-1.33346	0.13778	0.074409	0.295553	0.409989	-0.15164	0.311191	0.446676	-2.1245	-1.71121	0.0790408	0.184664	0.100601	0.160456	0.415258	0.102843	0.180583
SwissProt	Q8NI27		THO complex subunit 2 OS=Homo sapiens OX=9606 GN=THOC2 PE=1 SV=2	ENSG00000125676	THOC2	0	2.43122	2.56166	0.231074	0.241136	0.535816	0.742755	0.130447	0.535816	0.738893	5.85899	5.87289	0.15394	0.271521	0.942239	0.984423	0.0138956	0.942239	0.984433
SwissProt	Q8NI27-2		Isoform 2 of THO complex subunit 2 OS=Homo sapiens OX=9606 GN=THOC2	ENSG00000125676	THOC2	0	-5.67807	-4.65849	0.269597	1.50544	0.301302	0.561479	0.584246	0.489758	0.707597	-2.87314	-2.37738	0.925454	0.0277188	0.527955	0.847691	0.375572	0.851132	0.96015
MAJIQ		ENSG00000116001:s:70456322-70456450_70454954-70456396_S0	TIA1 cytotoxic granule associated RNA binding protein [Source:HGNC Symbol;Acc:HGNC:11802]	ENSG00000116001	TIA1	0	-1.5237	-2.02785	2.12489	1.5665	0.757419	0.88356	-2.42873	0.284624	0.696639	-0.508293	-1.52254	0.454204	0.871074	0.148254	0.904948	-0.0401277	0.984875	0.998293
MAJIQ		ENSG00000116001:s:70456322-70456450_70456223-70456396_L0	TIA1 cytotoxic granule associated RNA binding protein [Source:HGNC Symbol;Acc:HGNC:11802]	ENSG00000116001	TIA1	0	2.20753	2.43467	0.275401	0.227504	0.332572	0.664326	-2.84508	0.250055	0.691044	3.00993	3.20539	0.507398	0.426467	0.636425	0.983961	-0.790483	0.694518	0.988727
SwissProt	Q01085		Nucleolysin TIAR OS=Homo sapiens OX=9606 GN=TIAL1 PE=1 SV=1	ENSG00000151923	TIAL1	0	-4.86177	-6.23556	0.203575	N.D.	N.D.	NA	-1.26349	0.0009958	0.0554509	-5.88932	-4.62851	3.79931	2.6377	0.736999	0.921826	1.01322	0.639695	0.894909
SwissProt	Q01085-2		Isoform 2 of Nucleolysin TIAR OS=Homo sapiens OX=9606 GN=TIAL1	ENSG00000151923	TIAL1	0	2.43952	2.63729	0.337461	0.597704	0.643935	0.80824	0.197772	0.643935	0.806375	4.98095	5.22299	0.4008	0.406392	0.503406	0.83679	0.242033	0.503406	0.838707
MAJIQ		ENSG00000198498:t:164438224-164438711_164435310-164438586_S2	translation machinery associated 16 homolog [Source:HGNC Symbol;Acc:HGNC:25638]	ENSG00000198498	TMA16	0	0.115794	-0.967513	0.32879	0.198696	0.00813592	0.31199	0.994825	0.0010677	0.0382349	1.41064	0.522241	0.340514	0.272505	0.0242695	0.904948	1.6469	0.00535675	0.0440593
MAJIQ		ENSG00000198498:t:164438224-164438711_164436613-164438586_L1	translation machinery associated 16 homolog [Source:HGNC Symbol;Acc:HGNC:25638]	ENSG00000198498	TMA16	0	0.128074	-0.447606	1.01041	0.3441	0.40311	0.707149	-0.957277	0.066666	0.19849	2.30652	1.01365	0.184841	1.53042	0.219972	0.971447	0.0526407	0.541367	0.633843
SwissProt	Q96SK2-2		Isoform 2 of Transmembrane protein 209 OS=Homo sapiens OX=9606 GN=TMEM209	ENSG00000146842	TMEM209	0	-4.63108	-3.50595	1.32875	2.39009	0.515439	0.729876	1.12512	0.515439	0.725438	1.91799	2.03504	0.121638	0.0316809	0.182038	0.62347	0.117058	0.182038	0.622704
SwissProt	Q96SK2		Transmembrane protein 209 OS=Homo sapiens OX=9606 GN=TMEM209 PE=1 SV=2	ENSG00000146842	TMEM209	0			N.D.	N.D.	N.D.	NA	0.0360536	0.345796	0.481277	-2.76648	-4.83199	0.034354	N.D.	N.D.	NA	-2.6662	0.0471117	0.105566
MAJIQ		ENSG00000120802:s:98925458-98926050_98925616-98926601_L2	thymopoietin [Source:HGNC Symbol;Acc:HGNC:11875]	ENSG00000120802	TMPO	0	5.22031	4.97242	0.444729	0.732455	0.642653	0.845793	0.416873	0.815268	0.926216	5.94045	5.21633	0.335049	0.328637	0.0556676	0.904948	1.4499	0.331218	0.98075
MAJIQ		ENSG00000120802:s:98925458-98926050_98925616-98931253_S2	ENSG00000120802:s:98925458-98926050 OS=Homo sapiens GN=ENSG00000120802	ENSG00000120802	TMPO	0	-3.71093	-4.7031	0.134039	0.0628726	0.0109507	0.0921036	0.572939	0.126721	0.629156	-3.18656	-0.0386553	0.095	0.175343	0.0020007	0.0351661	1.66112	0.0891307	0.98075
MAJIQ		ENSG00000118503:t:138196973-138197303_138196172-138196973_S2	TNF alpha induced protein 3 [Source:HGNC Symbol;Acc:HGNC:11896]	ENSG00000118503	TNFAIP3	0		-1.58495		1.19393		NA	-0.0685342	0.965397	0.991798		-3.65954				NA	-0.49569	0.456234	0.98075
MAJIQ		ENSG00000118503:t:138196973-138197303_138196972-138197133_L0	TNF alpha induced protein 3 [Source:HGNC Symbol;Acc:HGNC:11896]	ENSG00000118503	TNFAIP3	0	-2.95594	1.53816	0.862823	0.334584	0.00109358	0.167864	-1.00254	0.219757	0.691044	-3.94709	-1.27195	0.885957	0.35137	0.0154197	0.83383	0.686081	0.656317	0.983822
SwissProt	Q02880		DNA topoisomerase 2-beta OS=Homo sapiens OX=9606 GN=TOP2B PE=1 SV=3	ENSG00000077097	TOP2B	0	2.02061	2.92916	0.499627	0.472745	0.0840555	0.298718	0.908555	0.0840555	0.308392	6.75111	7.2234	0.0515522	0.0564905	0.000432852	0.0745147	0.472284	0.000432852	0.0715323
SwissProt	Q02880-2		Isoform Beta-1 of DNA topoisomerase 2-beta OS=Homo sapiens OX=9606 GN=TOP2B	ENSG00000077097	TOP2B	0	-0.543774	1.20332	0.195519	0.0528582	0.00665273	0.050624	1.75088	0.00643922	0.0523521	5.85254	6.72706	0.00415597	0.0449328	0.00132857	0.0194379	0.876492	0.0010781	0.0186599
MAJIQ		ENSG00000101150:s:62505021-62505173_62505169-62507169_L0	TPD52 like 2 [Source:HGNC Symbol;Acc:HGNC:12007]	ENSG00000101150	TPD52L2	0	-1.99543	-1.02805	1.14444	0.528516	0.25453	0.618528	0.415136	0.6077	0.834074		-5.77433				NA	1.0814	0.46895	0.98075
MAJIQ		ENSG00000101150:s:62505021-62505173_62505169-62514072_S0	ENSG00000101150:s:62505021-62505173 OS=Homo sapiens GN=ENSG00000101150	ENSG00000101150	TPD52L2	0	3.82193	3.45644	0.0411438	0.09794	0.0397402	0.146909	-1.3271	0.359536	0.706858	-1.08508	-0.490795	0.235863	0.407293	0.21607	0.29832	-0.553658	0.730064	0.988727
RefSeq	P09493	NM_000366.5_2	tropomyosin 1 (alpha) (TPM1), transcript variant Tpm1.5, mRNA	ENSG00000140416	TPM1	0	-1.75039	-0.79597	0.448398	0.937015	0.286139	0.544102	2.42409	0.199011	0.480739	-1.64785	-1.17661	0.3363	0.209163	0.108338	0.598525	0.471238	0.108338	0.626507
RefSeq		NM_001330344.1_2	Homo sapiens tropomyosin 1 (alpha) (TPM1), transcript variant Tpm1.9, mRNA	ENSG00000140416	TPM1	0	2.55168	3.39972	0.18523	0.00694618	0.0230645	0.0836292	0.848035	0.0230645	0.0888282	0.122874	0.710052	0.107422	0.0456595	0.0191912	0.0496545	0.587178	0.0191912	0.0552248
MAJIQ		ENSG00000198467:s:35685142-35685336_35684804-35685266_S0	ENSG00000198467:s:35685142-35685336 OS=Homo sapiens GN=ENSG00000198467	ENSG00000198467	TPM2	0	3.99521	4.95687	0.0113709	0.107448	0.00625275	0.081515	-3.41813	0.261772	0.441656	-0.35373	0.480548	0.117364	0.303328	0.0682975	0.135463	-0.522954	0.0586254	0.141302
MAJIQ		ENSG00000198467:s:35685142-35685336_35685136-35685266_L0	tropomyosin 2 [Source:HGNC Symbol;Acc:HGNC:12011]	ENSG00000198467	TPM2	0	-2.82108	-0.442006	1.35106	0.652652	0.0515696	0.402505	-0.0697819	0.754902	0.85324	-1.64282	-2.29446	0.419676	1.33278	0.567531	0.983961	2.46542	0.00876755	0.0551154
SwissProt	Q9ULW0		Targeting protein for Xklp2 OS=Homo sapiens OX=9606 GN=TPX2 PE=1 SV=2	ENSG00000088325	TPX2	0	-1.06259	-0.0255084	0.305178	0.955643	0.147851	0.398911	1.03709	0.147851	0.40395	4.88219	2.62457	0.355064	0.490219	0.00295665	0.165572	-2.25762	0.00295665	0.16287
SwissProt	Q9ULW0-2		Isoform 2 of Targeting protein for Xklp2 OS=Homo sapiens OX=9606 GN=TPX2	ENSG00000088325	TPX2	0	-1.76756	-1.74851	0.887492	0.524702	0.981526	0.985003	0.0228271	0.9778	0.983506	3.88091	1.30236	0.00957536	0.151434	0.00172692	0.0206976	-2.57658	0.00163447	0.0205686
MAJIQ		ENSG00000171853:s:3469368-3469578_3469466-3481466_L0	trafficking protein particle complex 12 [Source:HGNC Symbol;Acc:HGNC:24284]	ENSG00000171853	TRAPPC12	0.001	-1.50471	-1.33787	0.73607	0.992791	0.839955	0.930925	0.792026	0.0909828	0.232944	-1.87169	-1.02884	1.0188	0.48063	0.369707	0.979485	1.56739	0.0120365	0.0621302
MAJIQ		ENSG00000171853:s:3469368-3469578_3469466-3482617_S1	trafficking protein particle complex 12 [Source:HGNC Symbol;Acc:HGNC:24284]	ENSG00000171853	TRAPPC12	0.007	-2.68311	-1.57965	1.22028	0.454189	0.216054	0.598188	0.55478	0.194874	0.374932	-5.51303	-3.69568		0.105395		NA	1.12366	0.00734786	0.051435
SwissProt	Q9UPN9-2		Isoform Beta of E3 ubiquitin-protein ligase TRIM33 OS=Homo sapiens OX=9606 GN=TRIM33	ENSG00000197323	TRIM33	0	-0.0134189	-0.350777	0.363898	0.369904	0.323116	0.584014	-0.337358	0.323116	0.579392	1.11711	-0.865784	0.706932	0.925261	0.0419892	0.397486	-1.98289	0.0419892	0.408482
SwissProt	Q9UPN9		E3 ubiquitin-protein ligase TRIM33 OS=Homo sapiens OX=9606 GN=TRIM33 PE=1 SV=3	ENSG00000197323	TRIM33	0	-0.696236	-0.422123	0.173574	0.46195	0.514417	0.615378	0.27789	0.511136	0.626418	-0.405085	-1.92957	0.0317705	0.648228	0.0799083	0.135178	-1.52252	0.0810221	0.151925
SwissProt	Q14669-2		Isoform 2 of E3 ubiquitin-protein ligase TRIP12 OS=Homo sapiens OX=9606 GN=TRIP12	ENSG00000153827	TRIP12	0	-7.01599	-4.24611	0.935326	1.1322	0.0308817	0.1925	2.76988	0.0308817	0.198503	-1.95318	-1.8286	0.529962	0.760987	0.827432	0.95145	0.124576	0.827432	0.955087
SwissProt	Q14669-3		Isoform 3 of E3 ubiquitin-protein ligase TRIP12 OS=Homo sapiens OX=9606 GN=TRIP12	ENSG00000153827	TRIP12	0	1.2127	1.48082	1.26671	0.102463	0.733302	0.860202	0.268117	0.733302	0.858479	3.43719	3.82074	0.206708	0.156506	0.0624852	0.4534	0.383555	0.0624852	0.46179
SwissProt	Q16881-5		Isoform 5 of Thioredoxin reductase 1, cytoplasmic OS=Homo sapiens OX=9606 GN=TXNRD1	ENSG00000198431	TXNRD1	0	4.3326	4.23542	0.122093	0.357682	0.679121	0.827841	-0.0971739	0.679121	0.825121	1.02859	0.50993	0.5266	0.221356	0.190903	0.63516	-0.518664	0.190903	0.633828
SwissProt	Q16881		Thioredoxin reductase 1, cytoplasmic OS=Homo sapiens OX=9606 GN=TXNRD1 PE=1 SV=3	ENSG00000198431	TXNRD1	0	3.40227	3.40704	0.0425003	0.0102292	0.891482	0.92384	0.00854938	0.795253	0.860126	-1.37716	1.28674	0.375281	0.0301676	0.00984009	0.0381392	2.66586	0.00989787	0.0420196
SwissProt	P17480		Nucleolar transcription factor 1 OS=Homo sapiens OX=9606 GN=UBTF PE=1 SV=1	ENSG00000108312	UBTF	0	2.51141	1.92795	0.125276	0.607364	0.17852	0.438186	-0.583465	0.17852	0.442671	5.08833	5.17713	0.178013	0.411967	0.749085	0.924275	0.0887919	0.749085	0.930318
SwissProt	P17480-2		Isoform UBF2 of Nucleolar transcription factor 1 OS=Homo sapiens OX=9606 GN=UBTF	ENSG00000108312	UBTF	0	-2.5898	-3.23117	0.545047	1.19035	0.443939	0.677969	-0.641374	0.443939	0.674465	-0.243138	0.397706	1.0514	1.12363	0.510624	0.838892	0.640844	0.510624	0.840354
SwissProt	Q04323-2		Isoform 2 of UBX domain-containing protein 1 OS=Homo sapiens OX=9606 GN=UBXN1	ENSG00000162191	UBXN1	0	0.349907	0.295809	0.54681	0.633643	0.916254	0.962728	-0.0540976	0.916254	0.962866	-2.0702	-0.881142	1.0822	0.266968	0.13836	0.561418	1.18906	0.13836	0.561469
SwissProt	Q04323		UBX domain-containing protein 1 OS=Homo sapiens OX=9606 GN=UBXN1 PE=1 SV=2	ENSG00000162191	UBXN1	0	1.61467	1.3327	0.138643	0.115181	0.15744	0.266089	-0.278189	0.159506	0.287698	-1.30358	-0.265786	0.0472873	0.410265	0.0708651	0.123614	1.03976	0.0693499	0.136079
SwissProt	Q96T88		E3 ubiquitin-protein ligase UHRF1 OS=Homo sapiens OX=9606 GN=UHRF1 PE=1 SV=1	ENSG00000276043	UHRF1	0	1.70536	-0.315521	0.285327	0.390309	0.00193171	0.0672738	-2.02089	0.00193171	0.0686524	4.50785	2.41965	0.227347	0.111911	0.000139946	0.0481076	-2.08819	0.000139946	0.04696
SwissProt	Q96T88-2		Isoform 2 of E3 ubiquitin-protein ligase UHRF1 OS=Homo sapiens OX=9606 GN=UHRF1	ENSG00000276043	UHRF1	0	0.742837	-1.27407	0.104668	0.66472	0.0514024	0.135345	-2.01313	0.0514133	0.143484	3.85447	1.35801	0.0120898	0.0738949	0.000449498	0.016828	-2.4945	0.000501013	0.0152878
SwissProt	P51809		Vesicle-associated membrane protein 7 OS=Homo sapiens OX=9606 GN=VAMP7 PE=1 SV=3	ENSG00000124333	VAMP7	0	0.45936	0.292421	0.292364	1.11252	0.813915	0.905481	-0.166939	0.813915	0.903704	-1.42412	-1.59288	0.467406	1.27664	0.84028	0.953105	-0.168761	0.84028	0.956532
SwissProt	P51809-2		Isoform 2 of Vesicle-associated membrane protein 7 OS=Homo sapiens OX=9606 GN=VAMP7	ENSG00000124333	VAMP7	0.002	-1.39249	-1.59742	N.D.	0.172163	N.D.	NA	1.93885	0.46149	0.585078	-2.46015		N.D.	N.D.	N.D.	NA	-1.57874	0.510477	0.590033
SwissProt	Q3ZAQ7		Vacuolar ATPase assembly integral membrane protein VMA21 OS=Homo sapiens OX=9606 GN=VMA21 PE=1 SV=1	ENSG00000160131	VMA21	0.001	-0.310754	-1.29681	0.589528	0.623408	0.117379	0.354279	-0.986054	0.117379	0.360018	-1.7521	-1.607	0.423617	1.13061	0.845278	0.955692	0.145098	0.845278	0.957832
SwissProt	Q3ZAQ7-2		Isoform 2 of Vacuolar ATPase assembly integral membrane protein VMA21 OS=Homo sapiens OX=9606 GN=VMA21	ENSG00000160131	VMA21	0.004	-0.50446	-0.955397	0.0762394	0.159543	0.0690163	0.160003	-0.44716	0.0682688	0.169258	-3.19787	-2.78619	0.343122	0.0430685	0.234295	0.309597	0.413652	0.232369	0.330933
RefSeq		NM_001317960.1_2	Homo sapiens 5'-3' exoribonuclease 2 (XRN2), transcript variant 1, mRNA	ENSG00000088930	XRN2	0	2.22944	2.5825	0.0664612	0.131188	0.0768786	0.166859	0.353065	0.0768786	0.177726	3.89181	3.22659	0.135977	0.0328595	0.0214041	0.0534911	-0.665219	0.0214041	0.0591618
RefSeq	O00429	NM_012255.4_1	5'-3' exoribonuclease 2 (XRN2), transcript variant 2, mRNA	ENSG00000088930	XRN2	0	3.08002	2.7877	0.524604	0.607493	0.562415	0.751026	-0.292323	0.562415	0.749887	5.07008	4.55981	0.218768	0.195543	0.0394691	0.467421	-0.51027	0.0394691	0.500937
SwissProt	Q9NYL2-2		Isoform 2 of Mitogen-activated protein kinase kinase kinase 20 OS=Homo sapiens OX=9606 GN=MAP3K20	ENSG00000091436	ZAK; MAP3K20	0	-0.973156	-2.01583	0.235551	1.02168	0.160091	0.412742	-1.04267	0.160091	0.41695	-1.90999	-1.62157	0.537341	0.475997	0.524799	0.845499	0.288423	0.524799	0.846252
SwissProt	Q9NYL2		Mitogen-activated protein kinase kinase kinase 20 OS=Homo sapiens OX=9606 GN=MAP3K20 PE=1 SV=3	ENSG00000091436	ZAK; MAP3K20	0			N.D.	N.D.	N.D.	NA	-0.0053919	0.969733	0.977359	-3.43095	-3.75562	0.260212	0.00434112	0.219728	0.293574	-0.322707	0.220498	0.318313
SwissProt	Q5T200		Zinc finger CCCH domain-containing protein 13 OS=Homo sapiens OX=9606 GN=ZC3H13 PE=1 SV=1	ENSG00000123200	ZC3H13	0	0.855049	-1.63436	0.998194	4.49653	0.402208	0.6473	-2.48941	0.402208	0.641662	1.73588	1.15234	0.547604	1.27848	0.507652	0.838509	-0.583539	0.507652	0.840291
SwissProt	Q5T200-2		Isoform 2 of Zinc finger CCCH domain-containing protein 13 OS=Homo sapiens OX=9606 GN=ZC3H13	ENSG00000123200	ZC3H13	0	-3.50559	-1.88061	0.750957	0.629045	0.143583	0.249795	1.62876	0.14327	0.267598	1.73656	0.469674	0.0534063	0.0283112	0.0011363	0.0186701	-1.26492	0.00110414	0.0186599
SwissProt	Q9ULU4-12		Isoform 12 of Protein kinase C-binding protein 1 OS=Homo sapiens OX=9606 GN=ZMYND8	ENSG00000101040	ZMYND8	0	-1.83239	-2.5799	0.379171	1.62398	0.480882	0.708281	-0.747503	0.480882	0.703071	1.3174	0.868254	0.478609	0.930141	0.498372	0.836645	-0.449146	0.498372	0.837575
SwissProt	Q9ULU4-10		Isoform 10 of Protein kinase C-binding protein 1 OS=Homo sapiens OX=9606 GN=ZMYND8	ENSG00000101040	ZMYND8	0		-4.38592	N.D.	N.D.	N.D.	NA	0.636392	0.411858	0.54194	-1.0694	-0.650161	0.507252	0.270112	0.41065	0.482209	0.421204	0.406882	0.493597
SwissProt	Q5BKZ1		DBIRD complex subunit ZNF326 OS=Homo sapiens OX=9606 GN=ZNF326 PE=1 SV=2	ENSG00000162664	ZNF326	0	0.469066	-0.0981432	0.529708	0.801229	0.364207	0.618727	-0.56721	0.364207	0.613559	5.1989	5.07564	0.27199	0.366745	0.664413	0.899753	-0.123265	0.664413	0.905278
SwissProt	Q5BKZ1-3		Isoform 3 of DBIRD complex subunit ZNF326 OS=Homo sapiens OX=9606 GN=ZNF326	ENSG00000162664	ZNF326	0	-6.02347	-4.22021	0.399587	0.516205	0.00874621	0.113606	1.80326	0.00874621	0.112298	-3.41634	-2.84662	3.11925	1.61187	0.792611	0.939713	0.569727	0.792611	0.943162
MAJIQ		ENSG00000126746:t:6779926-6780004_6780004-6781516_L1	zinc finger protein 384 [Source:HGNC Symbol;Acc:HGNC:11955]	ENSG00000126746	ZNF384	0						NA	-1.47354	0.257274	0.691044	-2.58868	-1.44901	1.12645	0.0407027	0.267872	0.979485	0.470998	0.8012	0.988727
MAJIQ		ENSG00000126746:t:6779926-6780004_6780004-6782382_S1	zinc finger protein 384 [Source:HGNC Symbol;Acc:HGNC:11955]	ENSG00000126746	ZNF384	0	-3.5565	-1.73255	0.478			NA	-2.67149	0.238572	0.691044	2.47225	2.50067	1.02601	0.792761	0.971536	0.989123	-1.78179	0.412762	0.98075
SwissProt	O95218-2		Isoform 2 of Zinc finger Ran-binding domain-containing protein 2 OS=Homo sapiens OX=9606 GN=ZRANB2	ENSG00000132485	ZRANB2	0	3.22654	1.83768	0.553234	1.16257	0.135078	0.380473	-1.38886	0.135078	0.385471	1.41708	1.2202	0.678125	1.31479	0.829009	0.95145	-0.196877	0.829009	0.955087
SwissProt	O95218		Zinc finger Ran-binding domain-containing protein 2 OS=Homo sapiens OX=9606 GN=ZRANB2 PE=1 SV=2	ENSG00000132485	ZRANB2	0	2.91992	3.15358	0.144255	0.0482729	0.161946	0.271456	0.23744	0.161086	0.289458	1.79626	2.1889	0.0877161	0.0589998	0.0343848	0.0777188	0.394609	0.0361101	0.0893589

## Sheet: peptides
SwissProt unique isoforms			MAJIQ+SP isoforms			MAJIQ unique isoforms			RefSeq unique isoforms
AAAASAAEAGIATTGTEDSDDALLK_	P55036		AALSEEELEK_	Q04637-9		AALFLQTLK_	ENSG00000061936:s:132241018-132241189_132241189-132250663_S0		AAEVYTR_	NM_001001520.2_2
AAAASAAEAGIATTGTEGER_	P55036-2		AASAIYR_	Q9UKM9-2		ADFQGISPER_	ENSG00000129562:t:23035989-23036065_23036065-23043959_L2		AALEEVYPDLTPEETRR_	NM_012255.4_1
AAALATVNAWAEQTGMK_	Q14008		AASAIYSGYIFDYDYYR_	Q9UKM9		AESTPEIAEQR_	ENSG00000169727:s:80012774-80012851_80012851-80013038_L0		AASSLNLSNGETESVK_	NM_001242559.1_2
AAALEAMK_1xOxidation [M7]	P31948-2		AASLTEDR_	Q04637-9		AESTPEIAER_	ENSG00000169727:s:80012774-80012851_80012851-80013041_S0		ACEMNGEECAEDLR_2xCarbamidomethyl [C2; C9]	NM_001220768.2_2
AAALEAMKDYTK_	P31948		AEEDVEPECIMEK_1xCarbamidomethyl [C9]	Q9UJU6		ALEESESSQLISPPLAQAIR_	ENSG00000120802:s:98925458-98926050_98925616-98926601_L2		ACEMNGEECAEDLR_2xCarbamidomethyl [C2; C9]; 1xOxidation [M4]	NM_001220768.2_2
AAALEFLNRFEEAK_	P31948		AEQENQELPDEGTLEETLTNETR_	P50851-2		ALELNMLSLK_	ENSG00000135069:s:80932592-80932720_80932720-80942967_L1		ACQLSVVVDDK_1xCarbamidomethyl [C2]	NM_001130823.2_2
AAEEEPSTSATVPMSK_	Q13356		AEQMFGEMEVWNAISER_1xOxidation [M]	O75400		ALELNMLSLK_1xOxidation [M6]	ENSG00000135069:s:80932592-80932720_80932720-80942967_L1		ACQLSVVVDDKK_1xCarbamidomethyl [C2]	NM_001130823.2_2
AAEEWSQHINGASHSR_	P43243-2		AEQMFGEMEVWNAISER_2xOxidation [M4; M8]	O75400		AMQADISQAAQILSSDPSR_	ENSG00000120802:s:98925458-98926050_98925616-98926601_L2		ADHTLSSLEPAYSAK_	NM_001288580.1_1
AAEVYTR_	Q7Z4V5		AESDLFLAEHHK_	P50851-2		AMQADISQAAQILSSDPSR_1xOxidation [M2]	ENSG00000120802:s:98925458-98926050_98925616-98926601_L2		ADKDYHFK_	NM_002520.6_2
AALLDQALSNAR_	Q9UPN3-5		AEVPGATGGDSPHLQPAEPPGEPR_	Q9P2K5		ASLYNAVTIEDVQK_	ENSG00000135069:s:80932592-80932720_80932720-80943897_S1		AEAISLQMVK_	NM_022771.4_3
AALNALQPPEFR_	Q3ZAQ7		AFDSAVAK_	Q16891-2		AYEAAASALQIATHTAFVAK_	ENSG00000120802:s:98925458-98926050_98925616-98926601_L2		AEATESAMEK_	NM_031243.2_3
AALSSQQQQQLALLLQQFQTLK_	Q6Y7W6		AFLSDMIK_	P50851-2		CAHPGCEK_2xCarbamidomethyl [C1; C6]	ENSG00000126746:t:6779926-6780004_6780004-6782382_S1		AEATESAMEK_1xOxidation [M8]	NM_031243.2_3
AAPENPGGVLSVELPGLLAQLAR_	A0FGR8-2		AGSLGINLVAANR_	P46100		CGDLEEELK_1xCarbamidomethyl [C1]	ENSG00000198467:s:35685142-35685336_35684804-35685266_S0		AEATESAMER_	NM_002137.3_3
AAQTAEDAMQIMEQMTK_	P30622-2		AGYVDFENGQWATDDIPDDLNSIR_	P55265-4		CGSSEDLHDSVR_1xCarbamidomethyl [C1]	ENSG00000167674:t:4501681-4502223_4501329-4501923_L0		AEATESAMER_1xOxidation [M8]	NM_002137.3_3
AASENSQDALR_	Q13422		AHLALEEDLNSEFR_	P46100		CGSSEDLHDVR_1xCarbamidomethyl [C1]	ENSG00000167674:t:4501681-4502223_4501329-4501926_S0		AECEILMMVGLPAAGK_1xCarbamidomethyl [C3]	NM_144732.4_1
AASSLNLSNGETESVK_	O95819-3		AHMLIDMHFR_	Q06787		DACELIER_1xCarbamidomethyl [C3]	ENSG00000198498:t:164438224-164438711_164435310-164438586_S2		AEDKPSTDLSAPVNGEATSQK_	NM_001001520.2_2
AATALKDVVK_	Q15084-5		AHQLWLSVEALK_	Q16891-2		DDFNSGFR_	ENSG00000106682:t:73609071-73609208_73604636-73609071_L2		AEDSDSEPEPEDNVR_	NM_001317960.1_2
AAVAGEDGR_	P07910-2		AIFQQPPVGVR_	Q7L2E3-2		DIAGSGDGTQEVSKPLPSEGSLAEADHTAHEEMEAHTTVK_	ENSG00000137776:t:59191990-59192136_59192136-59193459_L0		AEEDVEPECIMEK_1xCarbamidomethyl [C9]	NM_001014436.2_2
AAVPSGASTGIYEALELRDNDK_	P06733		AIIEEYLHLNDMK_1xOxidation [M12]	Q04637-9		DIVENICGR_1xCarbamidomethyl [C7]	ENSG00000120802:s:98925458-98926050_98925616-98926601_L2		AEELLAEEK_	NM_012062.4_2
AAVPSGASTGIYEALELRDNDKTR_	P06733		ALEHHR_	Q16891-2		DLETLPFGIALPIR_	ENSG00000234231:t:88019326-88019540_88016309-88019326_L2		AEGVSTPLAGR_	NM_033238.2_2
ACDLPAWVHFPDTER_1xCarbamidomethyl [C2]	A0FGR8-2		ALEKEEEEEK_	O75400		DLKDYFSK_	ENSG00000138668:s:83294599-83294678_83280792-83294599_S0		AEPYCSVLPGFTFIQHLPLSER_1xCarbamidomethyl [C5]	NM_144732.4_1
ACEMNGEECAEDLR_2xCarbamidomethyl [C2; C9]	Q13422		ALEQKPDDAQYYCQR_1xCarbamidomethyl [C13]	Q9Y2Z0		DLLEPGCSVLLNHK_1xCarbamidomethyl [C7]	ENSG00000100764:t:90730385-90730513_90730191-90730385_L1		AESTPEIAEQR_	NM_001321089.1_1
ACEMNGEECAEDLR_2xCarbamidomethyl [C2; C9]; 1xOxidation [M4]	Q13422		ALGISHAK_	Q7L2E3-2		DLPLIDSLIR_	ENSG00000166788:t:18104762-18105278_18105275-18108413_S2		AESTPEIAER_	NM_001321091.1_1
ACFHCETCK_3xCarbamidomethyl [C2; C5; C8]	Q14847-2		ALLSHDSGSDHLAFVR_	Q7L2E3-2		DLSLLSHGGR_	ENSG00000116791:s:75175782-75175931_75172888-75175782_L0		AETEELIR_	NM_033238.2_2
ACFQVGTSEEMK_1xCarbamidomethyl [C2]	P35658		ALPSEELNR_	Q04637-9		DLTEALDEDADPTK_	ENSG00000198604:s:35261981-35262127_35255427-35261981_L2		AETMGPMGWMK_	NM_152705.2_1
ACQLSVVVDDK_1xCarbamidomethyl [C2]	P26358-2		ALTNMSR_	Q9BY77		DSGSFVAFQNIPGSELMSSFAK_	ENSG00000120802:s:98925458-98926050_98925616-98926601_L2		AHELIEAEGIEDIEK_	NM_024755.3_3
ACQLSVVVDDKK_1xCarbamidomethyl [C2]	P26358-2		ALTQFPLPK_	Q7L2E3-2		DTSNHFHVFVGDLSPEITTEDIK_	ENSG00000116001:s:70456322-70456450_70454954-70456396_S0		AHHSSQEMSSEYR_	NM_002861.4_2
ADAASSLTVDVTPPTAK_	Q9H8Y8-3		ALVDPGPDFVVCDEGHILK_1xCarbamidomethyl [C12]	P46100		DTSSSTVVSTQR_	ENSG00000116001:s:70456322-70456450_70456223-70456396_L0		AHHSSQEMSSEYR_1xOxidation [M8]	NM_001184917.2_2
ADDFPVR_	Q3YEC7		ALYALQDIVSR_	Q15154-5		DYLLMEEEFIR_	ENSG00000100764:t:90730385-90730513_90729786-90730385_S2		AHNVPVLVCCETYK_2xCarbamidomethyl [C9; C10]	NM_001034116.1_2
ADKDYHFK_	P06748		AMALSYDQR_	P50851-2		DYLLMEEEFIR_1xOxidation [M5]	ENSG00000100764:t:90730385-90730513_90729786-90730385_S2		AIGLEIK_	NM_001130823.2_2
ADLGLWR_	Q14669-2		AMAPLHPHPAGMR_	Q9BY77		EATQILSVPK_	ENSG00000120802:s:98925458-98926050_98925616-98926601_L2		AIILAAAPGEK_	NM_001130823.2_2
ADMEDLMSSK_	P35580-3		AMAPLHPHPAGMR_1xOxidation [M]	Q9BY77		EDDALWPPPDR_	ENSG00000162385:s:53701249-53701307_53699324-53701249_L2		AIQALNGR_	NM_014281.4_2
ADMEDLMSSK_1xOxidation [M7]	P35580-4		AMESTESR_	P55265-4		EGPDLDRPGSDR_	ENSG00000167674:t:4501681-4502223_4501329-4501923_L0		AIVICPTDEDLK_1xCarbamidomethyl [C5]	NM_144732.4_1
ADMEDLMSSK_2xOxidation [M3; M7]	P35580-4		AMESTESR_1xOxidation [M2]	P55265-4		EGSLAEADHTAHEEMEAHTTVK_	ENSG00000137776:t:59191990-59192136_59192082-59193459_S0		AIVICPTDEDLKDR_1xCarbamidomethyl [C5]	NM_144732.4_1
ADMEDLMSSKDDVGKNVHELEK_	P35580-3		AMSTTSISSPQPGK_	Q9UJU6		EISGLWNELDSLK_	ENSG00000126777:s:56128240-56128575_56128330-56130673_L1		AIYDTPCIQAESEK_1xCarbamidomethyl [C7]	NM_002816.4_3
ADPDAAHRPR_	Q6P6C2-1		AMTILLEEAK_	P55265-4		ELAETIAADDGTADPR_	ENSG00000132361:t:2599728-2599832_2599832-2600013_L1		AKEDIVTEQIDFSAAR_	NM_001004065.4_3
ADQLDYENFR_	Q8NI27		AMTILLEEAK_1xOxidation [M2]	P55265-4		ELAETIAADDGTDPR_	ENSG00000132361:t:2599728-2599832_2599829-2600013_S1		ALDQASEEIWNDFR_	NM_006838.3_2
ADSINKPFAQQCQDLVK_1xCarbamidomethyl [C12]	Q9NXE4-2		AQLHDTNMELTDLK_	O14974-4		ELVPESQAYMDLLAFER_	ENSG00000066117:s:50480539-50480700_50480661-50481146_L0		ALDQSDNDMSAVYR_	NR_136697.1_3
AEAISLQMVK_	Q8TC07		AQQDVIMVLK_	P50851-2		ELVPESQAYMDLLAFER_1xOxidation [M10]	ENSG00000066117:s:50480539-50480700_50480661-50481146_L0		ALDQSDNDMSAVYR_1xOxidation [M9]	NR_136697.1_3
AEDKPSTDLSAPVNGEATSQK_	Q7Z4V5		ASEAQPPVAR_	Q13428-3		ENDKTEEMPNDSVLENK_	ENSG00000132780:s:46072154-46072352_46072263-46078841_S1		ALFLIPR_	NM_001242559.1_2
AEDLPLR_	Q9BSJ8		ASEDTTSGSPPK_	Q9BZZ5		EPLVATNLPGR_	ENSG00000120802:s:98925458-98926050_98925616-98926601_L2		ALQFPPEGWLR_	NM_001170544.1_1
AEEAMATYR_	Q92619-2		ASGANYSFHK_	Q9UJU6		EQVYDAMGEK_	ENSG00000132780:s:46072154-46072352_46072263-46072993_L1		ALQGASQIIAEIR_	NM_012062.4_2
AEEEQAGSAPGAGSTATK_	Q92619		ASSHSTDLMEAMAMGSVEASYK_	P14618-2		EQYQQQQQWGSR_	ENSG00000138668:s:83277949-83278048_83276554-83277949_S0		ALQGISGLK_	NM_001281303.1_2
AEEIWQQSVIGDYLAR_	P17480		ATPSVSVSK_	P50851-2		ESLAGNKPANAVLHK_	ENSG00000170004:s:7812461-7812702_7812656-7813746_S0		ALTNMSR_	NM_032311.4_3
AEELLAEEK_	O00429		AVDEAADALLK_	Q16891-2		ETTTGYYK_	ENSG00000120802:s:98925458-98926050_98925616-98926601_L2		ALVIVMGK_	NM_002628.4_2
AEGFYQK_	P78559-2		AVDEAVILLQEIGVLDQR_	Q7L2E3-2		EVSEEQPVVTLEK_	ENSG00000132780:s:46072154-46072352_46072263-46072993_L1		AMAGSVLLDK_	NM_001037333.2_1
AEGGYFGQIR_	Q8NI27		AVGASFPLYEPAK_	P46013		FAEAECLAESHQHLSK_1xCarbamidomethyl [C6]	ENSG00000170004:s:7812461-7812702_7812656-7813746_S0		AMAPLHPHPAGMR_	NM_032311.4_3
AEGLQVGQDAR_	Q8WWM7		CCSGAIIVLTK_2xCarbamidomethyl [C1; C2]	P14618		FAGLDTNQR_	ENSG00000165494:t:82879470-82881037_82878547-82879470_S0		AMAPLHPHPAGMR_1xOxidation [M]	NM_032311.4_3
AEGVSTPLAGR_	P29590		CFNTLTNSFQPSLLGR_1xCarbamidomethyl [C1]	P55265-4		FDIPLGLQGTR_	ENSG00000165494:t:82879470-82881037_82878547-82879470_S0		AMSTTSISSPQPGK_	NM_001014436.2_2
AEHIPAGK_	Q96HC4-6		CGESGHLAR_1xCarbamidomethyl [C1]	P62633		FEAHPNDLYVEGLPENIPFR_	ENSG00000233369:t:72598701-72598759_72597338-72598701_L2		APASEEEFQFLR_	NM_033238.2_2
AELLQGGDLLR_	Q12981		CGETGHVAINCSK_2xCarbamidomethyl [C1; C11]	P62633		FGALQSSR_	ENSG00000214331:s:74382765-74382913_74376152-74382765_S0		APQQQPPPQQPPPPQPPPQQPPPPPSYSPAR_	NM_144732.4_1
AELRDDPIISTHLAK_	O00231-2		CLAAALIVLTESGR_1xCarbamidomethyl [C1]	P14618-2		FGEVVDCTLK_1xCarbamidomethyl [C7]	ENSG00000138668:s:83294599-83294678_83280792-83294599_S0		APVNTAELTDLLIQQNHIGSVIK_	NM_016567.3_2
AETEELIR_	P29590		CSGIGDNPGSETAAPR_1xCarbamidomethyl [C1]	P50851		FGEVVDCTLKLDPITGR_1xCarbamidomethyl [C7]	ENSG00000138668:s:83294599-83294678_83280792-83294599_S0		AQGWAPLKPLPPSAK_	NM_152928.2_1
AEYLCR_1xCarbamidomethyl [C5]	Q15008		CYSCGEFGHIQK_2xCarbamidomethyl [C1; C4]	P62633		FHDIISDAEIEIVK_	ENSG00000122884:s:74806683-74806859_74803715-74806683_S0		ASDMVSTSR_1xOxidation [M4]	NM_174871.3_3
AFEDWLNDDLGSYQGAQGNR_	Q8N6T3-2		DAMENEMR_	Q16891-2		FILAPAK_	ENSG00000122884:s:74806683-74806859_74803715-74806683_S0		ASGANYSFHK_	NM_001014436.2_2
AFENLLGQALTK_	Q8WWI1-3		DCDLQEDACYNCGR_3xCarbamidomethyl [C2; C9; C12]	P62633		FLDKALELNMLSLK_	ENSG00000135069:s:80932592-80932720_80932720-80942967_L1		ASNGETLEK_	NM_032339.4_2
AFFAGSQR_	Q14697-2		DCDLQEDEACYNCGR_3xCarbamidomethyl [C2; C10; C13]	P62633-4		FLEEYLSSTPQR_	ENSG00000129562:t:23035989-23036065_23036065-23057853_S1		ASPSTAGETPSGVK_	NM_001034116.1_2
AFHYESNNDLEK_	Q92619-2		DDAITAYK_	Q9BY77		FLEMHQL_	ENSG00000135069:s:80932592-80932720_80932720-80943897_S1		ATTVPDFQETRPR_	NM_001287046.1_1
AFISNVK_	Q14008		DDGDEEGLLTHSEEELEHSQDTDADDGALQ_	Q9UKM9		FQETEFLSPPR_	ENSG00000120802:s:98925458-98926050_98925616-98926601_L2		AVALYFEDK_	NM_033020.2_3
AFLEETNAK_	Q96BY6-3		DFMLITNK_	Q8WUH1		FSSELEQIELHNSIR_	ENSG00000198498:t:164438224-164438711_164436613-164438586_L1		AVDPGLPSVK_	NM_001323949.1_3
AFNFLNEIK_	P51809		DFVTDADAEVLEHSGK_	P46100		GEEKPLDGQEHR_	ENSG00000170004:s:7810671-7810806_7810806-7810919_L0		AVFDNLIQLEHLNIVK_	NM_001321362.1_1
AFPYGNVAFPHLPGSAPSWPSLVDTSK_	Q6UN15		DGFVTEGELK_	O43852-4		GESAEDKEHEEGR_	ENSG00000167674:t:4501681-4502223_4501329-4501923_L0		AVMHFLVNHVK_	NM_012062.4_2
AFSEADMERPLQELGLVPSAVLIVAK_1xOxidation [M7]	Q04323		DGFVTVDELK_	O43852-3		GFGFVLFK_	ENSG00000138668:s:83294599-83294678_83280792-83294599_S0		AVTPPMPLLTPATPGGLPPAAAVAAAAATAK_1xOxidation [M6]	NM_078480.2_2
AFSWASVTSK_	Q9UN86		DGQYLLTGGDR_	P50851-2		GGAAPEGPNEAEVTSGKPEQEVPDAEEEK_	ENSG00000132780:s:46072154-46072352_46072263-46072993_L1		CAAGLAELAAR_1xCarbamidomethyl [C1]	NM_001321089.1_1
AGASISTLAGLSLK_	Q9UJW0		DGSAFEDGLR_	P55265-4		GGDQQSGYGK_	ENSG00000138668:s:83277949-83278048_83276554-83277949_S0		CDISAEIQQR_1xCarbamidomethyl [C1]	NM_033238.2_2
AGEAPTENPAPPTQQSSAE_	P16989-2		DHGYTTLATSVTLLK_	Q12824		GGFDATDDACMELR_1xCarbamidomethyl [C10]	ENSG00000198604:s:35261981-35262127_35255207-35261981_S2		CGSGPVHISGQHLVAVEEDAESEDEEEEDVK_1xCarbamidomethyl [C1]	NM_002520.6_2
AGEEVLAR_	A8MW92-2		DHVTATQLIQK_	P50851-2		GGTLFGGEVCK_1xCarbamidomethyl [C10]	ENSG00000120802:s:98925458-98926050_98925616-98926601_L2		CGSSEDLHDSVR_1xCarbamidomethyl [C1]	NM_001001520.2_2
AGGTDAPSANGEAGGESTK_	Q9NXW2-2		DILEPQNER_	P50851-2		GKPGTHFTQSDR_	ENSG00000185404:t:231256802-231256944_231253348-231256802_S2		CGSSEDLHDVR_1xCarbamidomethyl [C1]	NM_032631.3_2
AGIEGPLLASDVGR_	P18583-9		DINAVLIDMER_	P55265-4		GPPQPLPAVQPSGPINMEETRPEGSYFSK_	ENSG00000241978:t:112918599-112918777_112900819-112918599_S2		CIQCGQYLDDPDLK_2xCarbamidomethyl [C1; C4]	NM_001130823.2_2
AGLIQSR_	Q9P287-2		DINAVLIDMER_1xOxidation [M9]	P55265-4		GTIEINPR_	ENSG00000116791:s:75175782-75175931_75172678-75175782_S0		CSASCCEDSQASMK_3xCarbamidomethyl [C1; C5; C6]	NM_001329752.1_1
AGPMALSSK_	P78559-2		DINESDEVEVYSR_	Q06787		HKDETVDFQAPLLPVTCGGVK_1xCarbamidomethyl [C17]	ENSG00000185404:t:231256802-231256944_231254738-231256802_L2		CSASCCEDSQASMK_3xCarbamidomethyl [C1; C5; C6]; 1xOxidation [M13]	NM_001329752.1_1
AGSPSPQPSGELPR_	Q92619		DITEEIMSGAR_	Q04637-9		HNAAFCYK_1xCarbamidomethyl [C6]	ENSG00000259479:t:45127380-45127498_45127498-45131569_L2		DADPHFHHFLLSQTEK_	NM_001324098.1_3
AGVPLPPNLKPAPPPTIEEK_	P18583-9		DITEEIMSGAR_1xOxidation [M7]	Q04637-9		HSEAATAQR_	ENSG00000138668:s:83294599-83294678_83292737-83294599_L0		DADPHFHHFLLSQTEKPAVCYQAITK_1xCarbamidomethyl [C20]	NR_136697.1_3
AGVSVKPFQVK_	Q02880		DKDDDEVFEK_	Q04637-9		HSPTPQQSNR_	ENSG00000133226:s:24981346-24981620_24981620-24987210_L1		DAEALFK_	NM_001267056.1_2
AHAHLDTGR_	Q14697-2		DLSKPIGALNPK_	P50851-2		IALALNK_	ENSG00000138674:s:83784364-83784545_83783725-83784471_L0		DCELENQEAHEQDGNDELK_1xCarbamidomethyl [C2]	NM_024755.3_3
AHHSSQEMSSEYR_	Q99447		DMGYGNWISKPQEEK_	P55265-4		IDASELSFPFHESILK_	ENSG00000120802:s:98925458-98926050_98925616-98926601_L2		DCELENQEAHEQDGNDELKDSEEFGENEEENVHSK_1xCarbamidomethyl [C2]	NM_024755.3_3
AHHSSQEMSSEYR_1xOxidation [M8]	Q99447-3		DMGYGNWISKPQEEK_1xOxidation [M2]	P55265-4		IDASKNEEDEGHSNSSPR_	ENSG00000138668:s:83294599-83294678_83292737-83294599_L0		DCPGTAEEYER_1xCarbamidomethyl [C2]	NM_001037333.2_1
AHLSENELEALEK_	P98175-5		DPFSSSLQNR_	Q7L2E3-2		IFAQLDSIIDDR_	ENSG00000165475:s:21063509-21063635_21013893-21063509_L1		DDAITAYK_	NM_032311.4_3
AHPVAVASK_	Q9UIS9-9		DPTNIQLSK_	Q13813-2		IFISNTFNPAK_	ENSG00000066117:t:50482304-50483205_50481268-50482304_L0		DDEDSFR_	NM_001317960.1_2
AIAGMYK_	Q96M27		DSEDMGVVVSLGTGNR_1xOxidation [M5]	P55265-4		IGNAKGDDALEKR_	ENSG00000135069:s:80932592-80932720_80932720-80942967_L1		DDPYWSENK_	NM_024755.3_3
AIDDNQEMPPNK_1xOxidation [M8]	Q8NI27		DSGNWDTSGSELSEGELEK_	O75400		IGNFIVK_	ENSG00000259479:s:45139596-45139760_45131728-45139596_L2		DDSTKPKPEEEVKPVK_	NM_001288580.1_1
AIEEIAGVGVPELINSPK_	Q9BXW9-1		DSIFEPAK_	P55265-4		IGSLIDVNQSK_	ENSG00000162385:t:53694431-53694626_53694626-53701249_S2		DDSYFDR_	NM_020967.2_1
AIEQADLLQEEAETPR_	P56377		DSVAQGTTNVHSSEHAGR_	P46013		IIDDSEITK_	ENSG00000162385:s:53701249-53701307_53699324-53701249_L2		DDVVLPALHFHQGDSK_	NM_022771.4_3
AIGLEIK_	P26358-2		DTILAELLQIHK_	P46100		IIDDSEITKEDDALWPPPDR_	ENSG00000162385:s:53701249-53701307_53699324-53701249_L2		DELHIVEAEAMNYEGSPIK_	NM_002520.6_2
AIGTAYAVLSNPEK_	Q9NXW2		DTSNHFHVFVGDLSPEITTEDIK_	Q01085-2		IKDYLLMEEEFIR_	ENSG00000100764:t:90730385-90730513_90729786-90730385_S2		DELHIVEAEAMNYEGSPIK_1xOxidation [M11]	NM_002520.6_2
AIILAAAPGEK_	P26358-2		DTTIMELR_	P46100		IKDYLLMEEEFIR_1xOxidation [M7]	ENSG00000100764:t:90730385-90730513_90729786-90730385_S2		DELTDLDQSNVTEETPEGEEHHPVADTENKENEVEEVK_	NM_015640.3_2
AIKVEQATKPSFESGRR_	P38159		DVESVQTPSK_	P46013		ILGTAGTEEGQK_	ENSG00000116791:s:75175782-75175931_75172888-75175782_L0		DELTDLDQSNVTEETPEGEEHHPVADTENKENEVEEVKEEGPK_	NM_015640.3_2
AILILDNDGDR_	P61923-4		DYDGWTPLHAAAHWGK_	O14974-4		INEGLEHLAK_	ENSG00000134265:t:10539121-10539868_10526155-10539759_S0		DELTESPK_	NM_001018067.1_2
AIQALNGR_	Q9UHX1-2		EAALPPVSPLK_	Q04637-9		IQINPQNK_	ENSG00000129562:t:23035989-23036065_23036065-23043959_L2		DEYAFLQK_	NM_012062.4_2
AIQSNQPDR_	Q9NXW2-2		EAEAAIYHLQLFEELR_	P14618		ISLQIGDIK_	ENSG00000171853:s:3469368-3469578_3469466-3481466_L0		DFIHTASISFLTPLR_	NM_001287045.1_1
AISALVPQGGPVLCR_1xCarbamidomethyl [C14]	Q13330-3		EAEAAIYHLQLFEELRR_	P14618		IVLQNGAHEVFNHR_	ENSG00000116791:s:75175782-75175931_75172888-75175782_L0		DGEFTLTTLK_	NM_001004065.4_3
AITIAGIPQSIIECVK_1xCarbamidomethyl [C14]	Q15366-2		EAEAAMFHR_	P14618-2		IVVLFYK_	ENSG00000082153:t:201686870-201688569_201684843-201686870_S0		DGSDPYQEPK_	NM_001184917.2_2
AIYDTPCIQAESEK_1xCarbamidomethyl [C7]	O00232		EAEAAMFHR_1xOxidation [M6]	P14618-2		KPENSAESNTEETKR_	ENSG00000166788:t:18104762-18105278_18105278-18108413_L2		DIAGSGDGTQEVSKPLPSEGSLAEADHTAHEEMEAHTTVK_	NM_024755.3_3
AIYFDGDFGQIVR_	Q96RP9		EAEEESDHN_	Q04637-9		KPMVLGHEASGTVEK_	ENSG00000259479:s:45139596-45139760_45131728-45139596_L2		DIGKPEVEYDCDNLQHSK_1xCarbamidomethyl [C11]	NM_033020.2_3
AIYQATYR_	P28074		EAEMEEHR_1xOxidation [M4]	Q04637-9		KPMVLGHEASGTVEK_1xOxidation [M3]	ENSG00000259479:s:45139596-45139760_45131728-45139596_L2		DIIEYAELK_	NM_001037333.2_1
AKLQELEGAVK_	P35580-3		EAGLSWK_	Q04637-9		KPQLTQEELEAK_	ENSG00000061936:s:132241018-132241189_132241189-132249001_L0		DIKPENLLLGLK_	NM_001313953.1_1
ALALNCFAPINDQEGAEAK_1xCarbamidomethyl [C6]	Q96T88-2		EAIYNDVLTK_	P46100		KVELSESEDK_	ENSG00000133226:t:24987801-24987896_24987290-24987804_S2		DIVQFVPYR_	NM_152928.2_1
ALAVASK_	P35580-3		EAVEAQIR_	P50851-2		KVELSESEEDK_	ENSG00000133226:t:24987801-24987896_24987290-24987801_L2		DKDAYSSFGSR_	NM_001302552.2_3
ALAVMVDHLESEK_1xOxidation [M5]	Q14008-3		EAVGDLLDAFK_	Q04637-9		KVELSESEEDKGGK_	ENSG00000133226:t:24987801-24987896_24987290-24987801_L2		DLEIMQILTR_	NM_001267056.1_2
ALDLFSDNAPPPELLEIINEDIAK_	Q15084-5		EDAFYSWESSKDPAEQQGK_	Q04637-9		LASGEITQDDFLVVVHQIR_	ENSG00000165494:t:82879470-82881037_82878547-82879470_S0		DLFPYDK_	NM_001001520.2_2
ALDQSDNDMSAVYR_	Q49A26		EDALICFEEHIR_1xCarbamidomethyl [C6]	O75400		LDPITGR_	ENSG00000138668:s:83294599-83294678_83280792-83294599_S0		DLGMVVDLIFLNTEVSLSQALEDVSR_1xOxidation [M4]	NM_020967.2_1
ALDQSDNDMSAVYR_1xOxidation [M9]	Q49A26		EDFATFDYILCMDESNLR_1xCarbamidomethyl [C11]; 1xOxidation [M12]	P24666		LEISNAIK_	ENSG00000185404:t:231222520-231222682_231193546-231222520_L0		DLKPENLLLASK_	NM_001320898.1_1
ALEDINR_	P29590		EDMIDIK_	P20340-2		LEYSGSLQSSPPR_	ENSG00000105220:t:34856092-34856293_34855924-34856165_S1		DLMACAQTGSGK_1xCarbamidomethyl [C5]	NM_001302552.2_3
ALEDSSFLK_	Q8WWI1-3		EEDGEEIVTYDHLCK_1xCarbamidomethyl [C14]	Q8WUH1		LFDANKDR_	ENSG00000105220:t:34856092-34856293_34855995-34856165_L1		DLMACAQTGSGK_1xCarbamidomethyl [C5]; 1xOxidation [M3]	NM_004660.4_1
ALEEDIENHATDVHQAVK_	Q9UPN3-5		EETPTEGGALSLKPGLPIR_	P50851-2		LFSEYHEK_	ENSG00000069998:s:17640016-17640167_17629450-17640016_S2		DLSLENGAHAYNR_	NM_001130823.2_2
ALEEETKNHEAQIQDMR_	P35580-3		EFLPEGQDIGAFVAEQK_	Q04637-9		LGTMDMSITR_	ENSG00000234231:s:88031906-88032140_88032140-88035193_L0		DLTIPESSTVK_	NR_136697.1_3
ALEQQVEEMR_	P35580-3		EGPAHEPK_	P55265-4		LHILASGADVTSANAK_	ENSG00000198604:s:35261981-35262127_35255207-35261981_S2		DLVLGPSGVLQGIRPGK_	NR_136697.1_3
ALGDQFYK_	Q92784		ELDSITPEVLPGWK_	Q16891-2		LLEDSALSK_	ENSG00000066117:t:50482304-50483205_50481268-50482304_L0		DLYEDELVPLFEK_	NM_001102399.2_3
ALGLEESLVQEGR_	P78559-2		ELEDLEGYQNTIVAGSLITK_	O75400		LLEQAGSLK_	ENSG00000165475:s:21063509-21063635_21013893-21063509_L1		DMSALVAAR_	NM_001130823.2_2
ALGNICYDSHEGR_1xCarbamidomethyl [C6]	P52306		ELNVMFIETSAK_	P20340-2		LLPSALGVK_	ENSG00000170004:t:7792982-7793094_7788401-7792982_S1		DNTTLLTQVQTTMR_	NM_006400.4_1
ALIESLNQKPQTAGDQPPPTDTTHATHR_	Q9NXW2		ELPAAEPVLSPLEGTK_	Q9BY77		LLQSAHPVR_	ENSG00000234231:t:88019326-88019540_88016309-88019326_L2		DPIDVDLPEEAER_	NM_033238.2_2
ALLDSLQLGPDSLTVHLIHEVTK_	Q14697-2		EMDEAATAEER_	Q04637-9		LPEAVQLIEK_	ENSG00000134265:t:10539121-10539868_10534493-10539759_L1		DPNNLLNDWSQK_	NM_002816.4_3
ALMQVVDFLSR_1xOxidation [M3]	Q9GZT8		EMDEAATAEER_1xOxidation [M2]	Q04637-9		LQAALEAEEPDDER_	ENSG00000105323:t:41773983-41774253_41770597-41774128_S2		DPPASASQVTGIR_	NM_001130823.2_2
ALQGASQIIAEIR_	O00429		ENLANIFR_	P50851-2		LQWFQNHLDPQK_	ENSG00000198498:t:164438224-164438711_164435310-164438586_S2		DQGSSALSGVGGIR_	NM_001220768.2_2
ALQHTESPSETNKPHSK_	Q14669-2		ENLLGSIK_	P46100		LSNPSLVK_	ENSG00000198604:s:35261981-35262127_35255207-35261981_S2		DQPAFTPSGILTPHALGSR_	NM_012255.4_1
ALQQQQQQQQQK_	Q6Y7W6-3		ENMNLSEAQVQALALSR_	P46100		LSVEESEAAGDGVDTK_	ENSG00000132780:s:46072154-46072352_46072263-46072993_L1		DRRPVHLDQAAFR_	NM_012255.4_1
ALSSGGSITSPPLSPALPK_	Q6Y7W6		EPAFEDITLESER_	O75400		LTALAEDRPLFDGPSRPSVAR_	ENSG00000165494:t:82879470-82881037_82878547-82879470_S0		DRVPTYQYNMNFEK_	NM_001267056.1_2
ALSTGEK_	P62937		EPHPAEAEK_	Q9P2K5		LTEAMGGGWQQEQFEHYK_	ENSG00000133789:s:9715693-9715833_9715833-9746205_S0		DSEEFGENEEENVHSK_	NM_024755.3_3
ALSTGEKGFGYK_	P62937		EPSEVPTPK_	P17096-3		LVILEGELER_	ENSG00000198467:s:35685142-35685336_35684804-35685266_S0		DSGFSSGNTDTSSER_	NM_016653.2_2
ALSTGEKGFGYKGSCFHR_1xCarbamidomethyl [C15]	P62937		EQSFTSLEVR_	P46100		LVNSQGQLR_	ENSG00000069998:s:17640016-17640167_17630635-17640016_L2		DSKPSSTPR_	NM_002520.6_2
ALVFSVR_	Q9NVV4-2		EQWQEQINQLK_	Q15154-5		LVPSQEETK_	ENSG00000132780:s:46072154-46072352_46072263-46072993_L1		DSLYVDGDCTMDIR_1xCarbamidomethyl [C9]; 1xOxidation [M11]	NM_002628.4_2
ALVIVMGK_	P35080-2		ERPPEEVAAR_	Q16891-2		LVSGAGDIK_	ENSG00000228409:s:65217151-65217297_65217297-65219514_L1		DSSSVVEWTQAPK_	NM_022771.4_3
ALYTYEDGSDDLK_	Q16643-2		ERPSQPEGLR_	Q04637-9		LVTLEEFLK_	ENSG00000070081:t:17351674-17351847_17337022-17351674_L0		DTLQSELVGQLYK_	NM_012062.4_2
AMADPEVQQIMSDPAMR_	P31948		ESADGLQGETQLLVSR_	P46013		MAAADSVQQR_	ENSG00000133226:t:24987801-24987896_24987290-24987801_L2		DTMSDLPEVR_	NM_001130823.2_2
AMADPEVQQIMSDPAMR_2xOxidation [M2; M11]	P31948-2		ESPPTVDSTQQPNPLPLR_	Q15154-5		MAAHTMGNATVGR_	ENSG00000120802:s:98925458-98926050_98925616-98926601_L2		DVPDHAVLEMK_	NM_144732.4_1
AMADPEVQQIMSDPAMR_3xOxidation [M2; M11; M16]	P31948-2		ETFSSAEGTVDKDTTIMELR_	P46100		MASTDTPMAR_	ENSG00000118503:t:138196973-138197303_138196972-138197133_L0		DVPDHAVLEMK_1xOxidation [M10]	NM_144732.4_1
AMAGSVLLDK_	Q96F07-2		ETQTDSISR_	O14974-4		MCSLTFYSK_1xCarbamidomethyl [C2]	ENSG00000126746:t:6779926-6780004_6780004-6782382_S1		DYEEMASR_	NM_033238.2_2
AMEFVDVTESNAR_	Q8NB37		EVAGAKPHITAAEGK_	Q16891-2		MDDSSVLEATR_	ENSG00000241978:t:112930679-112934792_112918777-112930679_L2		EAASILQELQVETYGSMEK_	NM_002816.4_3
AMLTLNNCR_1xCarbamidomethyl [C8]	Q9BXW9-1		EVFSIAGTVK_	Q9P2K5		MEQVPAQVK_	ENSG00000145996:s:21065279-21065459_21065459-21108632_L1		EAEILSVLSHR_	NM_133646.2_2
AMLVFAEHR_	P42785		EVIEIEDASPTK_	P46100		MFIGGLSWDTTK_	ENSG00000138668:s:83294599-83294678_83280792-83294599_S0		EALGGQALYPHVLVK_	NM_144732.4_1
ANAEELANNLK_	Q86XP3		FAASGGFLHHMAGLSSSK_	Q9BY77		MFIGGLSWDTTK_1xOxidation [M1]	ENSG00000138668:s:83294599-83294678_83280792-83294599_S0		EDFATFDYILCMDESNLR_1xCarbamidomethyl [C11]; 1xOxidation [M12]	NM_004300.3_3
ANENSNIQVLSER_	Q6UN15		FAASGGFLHHMAGLSSSK_1xOxidation [M11]	Q9BY77		MFIGGLSWDTTKK_	ENSG00000138668:s:83294599-83294678_83280792-83294599_S0		EDIESQEIEAQEGEDDTFLTAQDGEEEENEK_	NM_024755.3_3
ANVEKPVK_	Q9H8Y8		FDSPESAEK_	Q9P2K5		MFIGGLSWDTTKKDLK_	ENSG00000138668:s:83294599-83294678_83280792-83294599_S0		EEALHQFR_	NM_001302552.2_3
ANVGAGKKPKE_	P62847		FGQTKPVYVYR_	P46100		MHSVGICGSDVHYWEYGR_1xCarbamidomethyl [C7]	ENSG00000259479:s:45139596-45139760_45131728-45139596_L2		EEEELFPESERPEMLSEQEHMSISGSSAR_	NM_014281.4_2
ANVVAECTLK_1xCarbamidomethyl [C7]	Q9UJU2		FHEQFIVR_	Q06787		MHSVGICGSDVHYWEYGR_1xCarbamidomethyl [C7]; 1xOxidation [M1]	ENSG00000259479:s:45139596-45139760_45131728-45139596_L2		EELSEEGYLAK_	NM_001130823.2_2
APASEEEFQFLR_	P29590		FIHGLIK_	Q7L2E3-2		MVDQLFCK_1xCarbamidomethyl [C7]	ENSG00000233369:t:72598701-72598759_72596188-72598701_S2		EEMIHNLQ_	NM_002816.4_3
APEDTVAEMK_	P78559-2		FLAQGTMEDK_	P46100		MVDQLFCK_1xCarbamidomethyl [C7]; 1xOxidation [M1]	ENSG00000233369:t:72598701-72598759_72596188-72598701_S2		EETNHSEMAEDLCK_1xCarbamidomethyl [C13]	NM_001220767.2_2
APEDTVAEMK_1xOxidation [M9]	P78559		FLYSELMK_	P55265-4		NAAGALDLLK_	ENSG00000187735:s:54934623-54934825_54923052-54934623_L2		EETNHSEMAEDLCK_1xCarbamidomethyl [C13]; 1xOxidation [M8]	NM_001220767.2_2
APLATGEDDDDEVPDLVENFDEASK_	P20290		FQYCVAVGAQTFPSVSAPSK_1xCarbamidomethyl [C4]	P55265-4		NEEDDMVEMEEER_	ENSG00000070081:t:17351674-17351847_17333667-17351674_S0		EFLMNTLNQSDTK_	NM_015885.3_3
APSLLYK_	Q8N9N2-2		FSALQQAVPTESTDNR_	Q04637-9		NEEDDMVEMEEER_1xOxidation [M6]	ENSG00000070081:t:17351674-17351847_17333667-17351674_S0		EFSFLDILR_	NM_022771.4_3
APVNTAELTDLLIQQNHIGSVIK_	Q9P287-2		FTNMLGQPGSTALDLFK_	O75400		NEEDDMVEMEEER_2xOxidation [M6; M9]	ENSG00000070081:t:17351674-17351847_17333667-17351674_S0		EGAPIEPDPPVSHWKPEAVYYEDGAR_	NM_001170544.1_1
APVTVTSLPAGVR_	P51610-4		FTNMLGQPGSTALDLFK_1xOxidation [M4]	O75400		NEEDEGHSNSSPR_	ENSG00000138668:s:83294599-83294678_83292737-83294599_L0		EGMEAAVEK_1xOxidation [M3]	NM_001317960.1_2
AQDLPLK_	Q9BSJ8		FVLINWTGEGVNDVR_	Q9UJU6		NIQATLESQK_	ENSG00000118503:t:138192350-138192659_138188679-138192350_L2		EGPDLDRPGSDR_	NM_001001520.2_2
AQLGINEISEDVYTAVEHSDSEDSEK_	Q9ULU4-10		FVNQLKGESR_	Q16891-2		NPLLITEEDAFK_	ENSG00000133789:s:9715693-9715833_9715833-9735013_L0		EGSLAEADHTAHEEMEAHTTVK_	NM_001013843.2_3
AQPPEAGPQGLHDLGR_	A0FGR8-2		GACASHVSTMASFLK_1xCarbamidomethyl [C3]	Q9UJU6		NQEQMKPLEEK_	ENSG00000100764:t:90730385-90730513_90729786-90730385_S2		EGSQGELTPANSQSR_	NM_001321089.1_1
AQPVPHYGVPFKPQIPEAR_	Q9ULW0		GAHVTINAR_	Q9UJU6		NQEQMKPLEEK_1xOxidation [M5]	ENSG00000100764:t:90730385-90730513_90729786-90730385_S2		EGVHGGGLNK_	NM_053024.3_2
AQQLEEAR_	Q9ULW0		GAMTSSMER_1xOxidation [M]	Q9P2K5		NQVDPETHCHAER_1xCarbamidomethyl [C9]	ENSG00000243811:t:39427699-39427978_39425524-39427699_L0		EGVIEAGAFQGGQR_	NM_001025593.2_2
AQSLLSTDR_	O00231-2		GAMTSSMER_2xOxidation [M3; M7]	Q9P2K5		NWEAMEALASTEK_	ENSG00000126777:s:56128240-56128575_56128330-56130673_L1		EIELENDLK_	NM_001287801.1_2
AQSSQDAVSSMNLFDLGGQYLR_1xOxidation [M11]	Q9UHX1		GDTPASATAGDTLSVPAPAVQPEESLK_	Q16891-2		NWNDEWDNLIK_	ENSG00000118503:t:138196973-138197303_138196972-138197133_L0		EIQMLAR_	NM_001302552.2_3
AQWGENLQVTLIPTHDTEVTR_	P78559		GEPAMESSQIVSR_	Q15154-5		NWQGGILSGGFEK_	ENSG00000214331:s:74382765-74382913_74376152-74382765_S2		EKEELIEEWQPEPLVPPVPK_	NM_001281303.1_2
ARPNTVISQEPFVPK_	Q9ULW0		GEPAMESSQIVSR_1xOxidation [M5]	Q15154-5		Peptide sequence + modifications	Master Protein Accessions		EKEESPQPR_	NM_001286192.1_1
ASAAPKPEPVPVQK_	Q96HC4		GEPGGILCFLPGWQEIK_1xCarbamidomethyl [C8]	Q7L2E3		QADLYISEGLHPR_	ENSG00000228409:t:65220767-65220962_65219648-65220767_L0		ELAFLEAAR_	NM_002861.4_2
ASDMVSTSR_1xOxidation [M4]	O00232-2		GETVNDCHAEIISR_1xCarbamidomethyl [C7]	P55265-4		QGEVIVSIEEKPK_	ENSG00000132780:s:46072154-46072352_46072263-46072993_L1		ELDQLDSK_	NM_015885.3_3
ASELGHSLNENVLKPAQEK_	Q8N6T3		GGGEGNVDETGNNPSVSLK_	P46100		QIQHPTASLIAK_	ENSG00000228409:t:65220767-65220962_65219648-65220767_L0		ELFDLALR_	NM_001037333.2_1
ASEPAGGPR_	Q8WWM7		GGPGGELPR_	Q04637-9		QLFQYQEGVR_	ENSG00000165494:t:82879470-82881037_82878547-82879470_S0		ELLEAVDAR_	NM_033238.2_2
ASESSSEEKDDYEIFVK_	P18583-9		GGPPGPPISR_	Q04637-9		QLPSLACK_1xCarbamidomethyl [C7]	ENSG00000120802:s:98925458-98926050_98925616-98926601_L2		ELLSAEENKR_	NM_024755.3_3
ASLASLDSNPSTNEK_	Q96BY6-3		GGTQEPAPVPAEPFDNTTYK_	P56181-2		QNQFYDTQVIK_	ENSG00000105323:t:41773983-41774253_41770703-41774128_L0		ELPAAEPVLSPLEGTK_	NM_032311.4_3
ASLLSNLGPCCK_2xCarbamidomethyl [C10; C11]	Q5T200		GHDLNEDGLVSWEEYK_	O43852-3		QQFEGYGLEIPDILNASNLK_	ENSG00000198498:t:164438224-164438711_164436613-164438586_L1		ELQNAPDAIPESGVEPPALDTAWVEATR_	NM_001321089.1_1
ASNIVMLR_	P98175-5		GIEQAVQSHAVAEEEAR_	Q16891-2		QSTDEEVTSLAK_	ENSG00000187735:s:54934623-54934825_54912610-54934623_S2		ELTMASLPFTFDVER_	NM_012255.4_1
ASPITNDGEDEFVPSDGLDK_	Q02880-2		GLFQTGQK_	Q9BRX5-3		RLDIQEALK_	ENSG00000066117:s:50480539-50480700_50480661-50481146_L0		ELTMASLPFTFDVER_1xOxidation [M4]	NM_001317960.1_2
ASSLSESSPPK_	Q9UHB6-4		GLNDFQCWEK_1xCarbamidomethyl [C7]	Q9BRX5-3		RLFDANKDR_	ENSG00000105220:t:34856092-34856293_34855995-34856165_L1		EMILNPEGDVNSAK_	NM_003915.5_3
ASSSILIDESEPTTNIQIR_	Q9UNZ2-5		GLPLVDDGGWNTVPISK_	Q04637-9		RPELLTHSTTEVTQPR_	ENSG00000233369:t:72598701-72598759_72597338-72598701_L2		EMILNPEGDVNSAK_1xOxidation [M2]	NM_003915.5_3
ASSTSLTSTQPTK_	P35658-5		GMSVSDLADK_	Q16891-2		RPIIVISDK_	ENSG00000118503:t:138196973-138197303_138196972-138197133_L0		ENITEDEAK_	NM_001288581.1_1
ASVHCLETGEYTHIR_1xCarbamidomethyl [C5]	Q8NI27		GMSVSDLADKLSTDDLNSLIAHAHR_	Q16891-2		SAWLSGYENPVVSR_	ENSG00000122884:s:74804739-74804809_74790128-74804739_S0		EPSEVPTPK_	NM_001319079.1_2
ASYGHSMVVDPWGTVVAR_	Q86X76		GPAGLGPR_	Q04637-9		SEDPPGQEAGSEEEGSSASGLAK_	ENSG00000132361:t:2599728-2599832_2599832-2600013_L1		EPVDEDLYPEHYR_	NM_001130823.2_2
ATAATVVLQAMGLVPK_	P18583-5		GPQAGLGPR_	Q04637-8		SGIQPLCPER_1xCarbamidomethyl [C7]	ENSG00000120802:s:98925458-98926050_98925616-98926601_L2		EQEEELR_	NM_001001520.2_2
ATAGAYIASQTVK_	P28074		GQASQITASNLVQNYK_	Q9BRX5-3		SHISDQSPLSSK_	ENSG00000120802:s:98925458-98926050_98925616-98926601_L2		EQIVTIGNKPVETIGFDSIMK_	NM_001287801.1_2
ATAGAYIASQTVKK_	P28074		GSDVIIMLVGNK_1xOxidation [M7]	P20340		SHTETKPHK_	ENSG00000126746:t:6779926-6780004_6780004-6782382_S1		ESADFWCFECEQLLCAK_3xCarbamidomethyl [C7; C10; C15]	NM_033238.2_2
ATEDGEEDEVSAGEK_	Q9BXW9		GSPAPAVLAEEAR_	P56181-2		SLAKPETDKEQDSEMEK_	ENSG00000132780:s:46072154-46072352_46072263-46072993_L1		ETAEADVASLNR_	NM_001330344.1_2
ATGFDGGNKADQLDYENFR_	Q8NI27		GSSFEMTDDDSAIR_	Q7L2E3		SLAKPETDKEQDSEMEK_1xOxidation [M15]	ENSG00000132780:s:46072154-46072352_46072263-46072993_L1		EVFRPLKPADLTALAK_	NM_001242559.1_2
ATISALEAK_	P35580-3		GSSFEMTDDDSAIR_1xOxidation [M6]	Q7L2E3		SLDLDSCTLSEILR_1xCarbamidomethyl [C7]	ENSG00000198604:s:35261981-35262127_35255207-35261981_S2		EVFRPLKPAGEVDLTALAK_	NM_145687.3_2
ATPEQYQILKENYGQK_	P14324-2		GTFHDDRDDGVDYWAK_	Q9NYF8-3		SPSPAPPPR_	ENSG00000133226:s:24989151-24989559_24989295-24993306_S2		EWDLLNENIMLLSK_	NM_002816.4_3
ATSHVGEIEQELALAR_	P30622-2		GTLGGLFSQILQGEDIVR_	Q9BZZ5-2		SPSWYGIPR_	ENSG00000233369:t:72598701-72598759_72597338-72598701_L2		EWHGPPSQGPSYHDTR_	NM_024755.3_3
ATTVPDFQETRPR_	Q9NR46		GTVIVQPEPVLNEDK_	P46100		SQEFVETGLCYDTR_1xCarbamidomethyl [C10]	ENSG00000118503:t:138196973-138197303_138196172-138196973_S2		EYADSFGK_	NM_002861.4_2
AVALYFEDK_	Q9UPN9-2		GTVIVQPEPVLNEDKDDFK_	P46100		SQTIYEIIDNSQGFYVCPVEPQNR_1xCarbamidomethyl [C17]	ENSG00000135069:s:80932592-80932720_80932720-80942967_L1		FAASGGFLHHMAGLSSSK_	NM_032311.4_3
AVEEEEEETANVEMSEK_1xOxidation [M14]	P78559		GTVIVQPEPVLNEDKDDFKGPEFR_	P46100		SSASLSGSSSSSSSSR_	ENSG00000133226:s:24981346-24981620_24981620-24987210_L1		FAASGGFLHHMAGLSSSK_1xOxidation [M11]	NM_032311.4_3
AVEHINK_	P06733		GVIDLIFEK_	Q04637-9		SSSSSSQPEHSAMLVSTAASPSLIK_	ENSG00000120802:s:98925458-98926050_98925616-98926601_L2		FAGLDTNQR_	NM_015885.3_3
AVEHINKTIAPALVSK_	P06733		GVLMAGLYPNLIQVR_	Q7L2E3-2		SSSSSSQPEHSAMLVSTAASPSLIK_1xOxidation [M13]	ENSG00000120802:s:98925458-98926050_98925616-98926601_L2		FATEYCNTIEGTAK_1xCarbamidomethyl [C6]	NM_012062.4_2
AVELMDR_	Q14008		GVYSEETLR_	Q16891-2		SSTPLPTISSSAENTR_	ENSG00000120802:s:98925458-98926050_98925616-98926601_L2		FDAERPVDCSVIVVNK_1xCarbamidomethyl [C9]	NM_020967.2_1
AVIYNPATQADWTAK_	P35580-4		GYAFVQYSNER_	Q9UKM9		SVFLEQMK_	ENSG00000082153:t:201686870-201688569_201686028-201686870_L2		FDIPLGLQGTR_	NM_015885.3_3
AVMHFLVNHVK_	O00429		GYGFVSFYNK_	Q01085-2		SVMEELK_	ENSG00000162385:s:53701249-53701307_53699324-53701249_L2		FDSNCITPGTEFMDNLAK_1xCarbamidomethyl [C5]; 1xOxidation [M13]	NM_001317960.1_2
AVSQLIADAGIGGSR_	Q96BY6-3		HEYVLAVR_	P46100		SVMEELKR_	ENSG00000162385:s:53701249-53701307_53699324-53701249_L2		FENYGDK_	NM_144732.4_1
AVTPPMPLLTPATPGGLPPAAAVAAAAATAK_1xOxidation [M6]	Q9UHX1		HGIPMSHVAR_	P24666		SVSGTDVQEECR_1xCarbamidomethyl [C11]	ENSG00000132780:s:46072154-46072352_46072263-46072993_L1		FFGTEDHAWIK_	NR_136697.1_3
AVTTVTQSTPVPGPSVPK_	P51610-4		HGVESTLER_	Q04637-9		SWHDVQVSSAYVK_	ENSG00000101150:s:62505021-62505173_62505169-62507169_L0		FFLLENVR_	NM_001130823.2_2
AVTTVTQSTPVPGPSVPPPEELQVSPGPR_	P51610		HPFIVNHPK_	P55265-4		TCQFCPQFR_2xCarbamidomethyl [C2; C5]	ENSG00000118503:t:138192350-138192659_138188679-138192350_L2		FFQEENTEK_	NM_002816.4_3
AVVVSPK_	O75909		HPSLQVLICK_1xCarbamidomethyl [C9]	P46100		TEDESLVENNDNIDEEAR_	ENSG00000132780:s:46072154-46072352_46072263-46072993_L1		FFSFIEGCLVK_1xCarbamidomethyl [C8]	NM_001242559.1_2
AYIASAGADALAK_	Q13033		HSAQTEEPVQAK_	Q15154-5		TEEMPNDSVLENK_	ENSG00000132780:s:46072154-46072352_46072263-46078841_S1		FGHGSDYSR_	NM_024755.3_3
CATPVIIDEILPSK_1xCarbamidomethyl [C1]	Q9ULW0		HYPVFENPK_	P55265-4		TEEMPNDSVLENK_1xOxidation [M4]	ENSG00000132780:s:46072154-46072352_46072263-46078841_S1		FGIYDIDNK_	NM_152928.2_1
CDISAEIQQR_1xCarbamidomethyl [C1]	P29590		ICDYLFNVSDSSALNLAK_1xCarbamidomethyl [C2]	P55265-4		TFANSSYLAQHIR_	ENSG00000126746:t:6779926-6780004_6780004-6782382_S1		FGNVYLAR_	NR_132731.1_1
CGSGPVHISGQHLVAVEEDAESEDEEEEDVK_1xCarbamidomethyl [C1]	P06748		IEATGVIQSCAK_1xCarbamidomethyl [C10]	Q15154-5		TFANTSYLAQHLR_	ENSG00000126746:t:6779926-6780004_6780004-6781516_L1		FINYVK_	NM_002520.6_2
CGSSEDLHDSVR_1xCarbamidomethyl [C1]	Q7Z4V5		IELLGSYDPQK_	P24666		TFPFLEGLR_	ENSG00000185404:t:231222520-231222682_231193546-231222520_L0		FIQVHPITK_	NM_003915.5_3
CGSSEDLHDVR_1xCarbamidomethyl [C1]	Q7Z4V5-2		IESLEQEK_	O14974-4		TGLFTPDLAFEAIVK_	ENSG00000079805:t:10909063-10909248_10906875-10909162_S1		FLINTIK_	NM_152705.2_1
CIQCGQYLDDPDLK_2xCarbamidomethyl [C1; C4]	P26358-2		IGLSDAR_	Q9BY77		TGLFTPDMAFEAIVK_	ENSG00000079805:t:10909063-10909248_10908194-10909162_L1		FNEADSEVAQAGK_	NM_033020.2_3
CIWSTPK_1xCarbamidomethyl [C1]	Q9HB58-7		IHNAENIQPGEQK_	Q04637-9		THQALGILSK_	ENSG00000120802:s:98925458-98926050_98925616-98926601_L2		FPESSAVQSSSFER_	NM_024755.3_3
CMMAQYNR_1xCarbamidomethyl [C1]	P31948		IIATVLMTEDIK_1xOxidation [M7]	Q04637-9		TLSMIEEEIR_	ENSG00000241978:t:112918599-112918777_112900819-112918599_S2		FPFELVK_	NM_004408.3_2
CQHAAEIITDLLR_1xCarbamidomethyl [C1]	Q96AE4-2		IIEDGDGAGAETPVIENR_	Q15154-5		TQETLSQAGQK_	ENSG00000101150:s:62505021-62505173_62505169-62514072_S0		FPSGSVLTGTLSVLK_	NM_001287801.1_2
CQPVFSFGNSEQTK_1xCarbamidomethyl [C1]	P49790		IINILTDK_	P50851-2		TSAALSTVGSAISR_	ENSG00000101150:s:62505021-62505173_62505169-62514072_S0		FQQAVDAVEEFLR_	NR_136697.1_3
CRDDSFFGETSHNYHK_1xCarbamidomethyl [C1]	P43243		ILAAIIMK_	P55265-4		TVVSHSLTTLGLEVAK_	ENSG00000120802:s:98925458-98926050_98925616-98926601_L2		FTDDYQLFEELGK_	NM_172171.2_1
CRDDSFFGETSHNYHKFDSEYER_1xCarbamidomethyl [C1]	P43243		ILAYTEGLHGK_	P50851-2		TYDAASYICEAAFDEVK_1xCarbamidomethyl [C9]	ENSG00000120802:s:98925458-98926050_98925616-98926601_L2		FTEDSLLR_	NM_001130823.2_2
CSVTLLNETESLK_1xCarbamidomethyl [C1]	Q13330-3		ILEDHGSPAGEIDDEDKDKDETETVK_	Q15154-5		VAMSKEQYQQQQQWGSR_	ENSG00000138668:s:83277949-83278048_83276554-83277949_S0		FTTSQTDVYADHLDWHYR_	NM_015885.3_3
CVIEGNNCTFVR_2xCarbamidomethyl [C1; C8]	Q9NVV4		ILSVELPK_	Q9BRX5-3		VATAQDDITGDGTTSNVLIIGELLK_	ENSG00000228409:t:65220767-65220962_65219648-65220767_L0		FVGQSEGK_	NM_024755.3_3
CVSVQTDPTDEIPTK_1xCarbamidomethyl [C1]	P18583-9		ILVDNLCDMEMVNK_1xCarbamidomethyl [C7]	O14974-4		VDLPLIDSLIR_	ENSG00000166788:t:18104762-18105278_18105278-18108413_L2		FVLINWTGEGVNDVR_	NM_001014436.2_2
CYVDMSTVDADTVTELAQVIVSR_1xCarbamidomethyl [C1]; 1xOxidation [M5]	Q49A26		IMDSSQNAYNEDTSALVAR_	Q9BRX5-3		VELSESEDK_	ENSG00000133226:t:24987801-24987896_24987290-24987804_S2		FVSNITR_	NM_001130823.2_2
DADPHFHHFLLSQTEK_	Q49A26-2		IMDSSQNAYNEDTSALVAR_1xOxidation [M2]	Q9BRX5		VELSESEEDK_	ENSG00000133226:t:24987801-24987896_24987290-24987801_L2		FYFENLLSK_	NM_172171.2_1
DADPHFHHFLLSQTEKPAVCYQAITK_1xCarbamidomethyl [C20]	Q49A26		INVVNNHQAK_	Q9BY77		VHAVIGVLMDDTDPLVTVMK_	ENSG00000100764:t:90730385-90730513_90730191-90730385_L1		FYFLEAYNAK_	NM_001130823.2_2
DAEALSQR_	P35580-3		IPEFNWSQMHQR_	P50851-2		VHAVIGVLMDDTDPLVTVMK_2xOxidation [M9; M19]	ENSG00000100764:t:90730385-90730513_90730191-90730385_L1		FYRPENTHK_	NM_001130823.2_2
DAGGMVIDMK_	P35658		IQNPQILK_	P50851-2		VIEEEWQQVDR_	ENSG00000120802:s:98925458-98926050_98925616-98926601_L2		GACASHVSTMASFLK_1xCarbamidomethyl [C3]	NM_001014436.2_2
DALLDHDLALPLCLLMAQQR_1xCarbamidomethyl [C13]	Q8NI27		ISEMEEELK_	O14974-4		VLAQNSGFDLQETLVK_	ENSG00000228409:s:65225411-65225543_65225543-65226633_L1		GAHVTINAR_	NM_001014436.2_2
DALRPPLQNINSVQLK_	Q14008		ISGSGSNSDMMENSK_	P46100		VLNQLEELLSDMK_	ENSG00000170004:s:7812461-7812702_7812656-7813746_S0		GAIENLLAK_	NM_033020.2_3
DAQHYGGWEHR_	Q14697-2		ISGSGSNSDMMENSK_2xOxidation [M10; M11]	P46100		VLQNMEQCQK_1xCarbamidomethyl [C8]; 1xOxidation [M5]	ENSG00000166788:t:18104762-18105278_18105278-18108413_L2		GAILTTMLVSR_	NM_172171.2_1
DASSSTFPTLTR_	Q9BXW9-1		ISLASPR_	P50851-2		VNLEVIKPWITK_	ENSG00000133226:s:24973158-24973280_24973280-24975350_S0		GAQYQPILR_	NM_001130823.2_2
DAYSGGAVNLYHVR_	P28074		ISSVSEVMK_	Q16891-2		VNVVQYPELSDHEFIEEK_	ENSG00000234231:t:88019326-88019540_88016309-88019326_L2		GDIVFVDR_	NM_001281303.1_2
DCPGTAEEYER_1xCarbamidomethyl [C2]	Q96F07-2		ITKPGSIDSNNQLFAPGGR_	Q04637-9		VPHDPVALEEHFR_	ENSG00000133789:s:9715693-9715833_9715833-9746205_S0		GEHVALANWQNHASLR_	NM_001034116.1_2
DCSNGCSAECTGEGGSK_3xCarbamidomethyl [C2; C6; C10]	P54687		ITTGSSSAGTQSR_	O14974-4		VPVVFVTNAGNILQHSK_	ENSG00000069998:s:17640016-17640167_17630635-17640016_L2		GESAEDKEHEEGR_	NM_001001520.2_2
DDFLGSFCR_1xCarbamidomethyl [C8]	Q9NXE4-2		ITTGSSSAGTQSSTSNR_	O14974		VQIAANEETQER_	ENSG00000132780:s:46072154-46072352_46072263-46072993_L1		GFCFLEYEDHKTAAQAR_1xCarbamidomethyl [C3]	NM_001159676.1_3
DDPQVMEDK_	P79522-2		IVASSHDHGYTTLATSVTLLK_	Q12824-2		VVLGDSVSTGTTDQQGGVAEVK_	ENSG00000164615:t:134079677-134079742_134077213-134079677_L2		GGFLPPEEIK_	NM_012255.4_1
DDPQVMEDK_1xOxidation [M6]	P79522-2		IVASSHGK_	Q12824		VVTSENEAGK_	ENSG00000132780:s:46072154-46072352_46072263-46072993_L1		GGGSQHYPEER_	NM_024755.3_3
DDPSDVTDEDEGPAEPPPPPK_	Q3YEC7-2		IYQEGWR_	Q9BRX5-3		VVVPELSAGVAR_	ENSG00000146247:s:79707131-79707314_79700699-79707131_S2		GGHPPAIQSLINLLADNR_	NM_020967.2_1
DDSFFGETSHNYHK_	P43243		KAHQLWLSVEALK_	Q16891-2		VVVPELSAGVASR_	ENSG00000146247:s:79707131-79707314_79700702-79707131_L2		GGSGSHNWGTVKDELTESPK_	NM_001018067.1_2
DDSLDLSPQGR_	Q14669-2		KEEEESQPAK_	O75400		YPIVLGYDSHHFVPLVTLK_	ENSG00000118503:t:138196973-138197303_138196972-138197133_L0		GGTQEPAPVPAEPFDNTTYK_	NM_021075.3_3
DDYTIPDEYR_	P43243		KLPDFLTAK_	Q9BZZ5-2		YSDNEEDSK_	ENSG00000120802:s:98925458-98926050_98925616-98931253_S2		GHAVNLLDVPVPVAR_	NM_012062.4_2
DEADVLEVDQGFDDHNLPCDVIWLDIEHADGK_1xCarbamidomethyl [C19]	Q14697-2		KLPEEEVESSR_	Q15154-5		YSEAAELR_	ENSG00000241978:t:112918599-112918777_112900819-112918599_S2		GHDDLGDHYLDCGDLSNALK_1xCarbamidomethyl [C12]	NM_001321089.1_1
DEALEQNIQALEENHQTQEQESLVQEDK_	P78559		KNESPFWK_	P46013					GLDISNVR_	NM_001302552.2_3
DEDFVKPK_	Q9UNZ2-5		KNPASLPLTQAALK_	Q13428-3					GPPGPESQSR_	NM_020967.2_1
DEDHIALIIELLGK_	Q96SB4-3		KPAPVPAEPFDNTTYK_	P56181					GPPPLFQQQR_	NM_012255.4_1
DEEEETHMK_	Q16643-3		KQEGPATQVDSAVGTLPATSPQSTSVQAK_	Q13428-7					GPPQPLPAVQPSGPINMEETRPEGSYFSK_	NM_001004065.4_3
DEEEETHMK_1xOxidation [M8]	Q16643-3		KQEGPATQVSK_	Q13428-3					GPPVFTQEER_	NM_002861.4_2
DEFRPNLSHTGR_	Q13356		KQPPKEPSEVPTPK_	P17096-2					GPSAAGEQEPDKESGASVDEVAR_	NM_006838.3_2
DEIFAQSK_	P35580-3		KSDVETIFSK_	Q9UKM9					GPSSVEDIK_	NM_002520.6_2
DEILSDVASR_	Q9Y4P1		LAFNSLLEK_	O75400					GPSYGEDVSNTTTAQK_	NM_033238.2_2
DELHIVEAEAMNYEGSPIK_	P06748		LAPITSDPTEATAVGAVEASFK_	P14618					GQNVLLTENAEVK_	NM_001242559.1_2
DELHIVEAEAMNYEGSPIK_1xOxidation [M11]	P06748		LAQQEKQEQVKIESLAK_	Q16891-2					GQVTALVSLK_	NM_016567.3_2
DELMAAVR_1xOxidation [M4]	Q15008		LASTSDIEEK_	O14974-4					GSDPSTHQRPPSEMADFLSDAIPGLK_	NM_022771.4_3
DELTDLDQSNVTEETPEGEEHHPVADTENK_	Q8NC51-3		LAYVAPTIPR_	O14974-4					GSLESPATDVFGSTEEGEK_	NM_002816.4_3
DELTDLDQSNVTEETPEGEEHHPVADTENKENEVEEVK_	Q8NC51-3		LDAENAIVHMGGQWLGGR_	Q01085-2					GSLESPATDVFGSTEEGEKR_	NM_002816.4_3
DELTDLDQSNVTEETPEGEEHHPVADTENKENEVEEVKEEGPK_	Q8NC51-3		LDAENAIVHMGGQWLGGR_1xOxidation [M10]	Q01085-2					GSNLDAPEPYR_	NM_001130823.2_2
DELTESPK_	Q8NC51		LDIETGFHR_	Q9Y2Z0					GSPAPAVLAEEAR_	NM_021075.3_3
DEMEEWSASEANLFEEALEK_1xOxidation [M3]	Q13330-3		LDMFGNDDK_	P50851-2					GSTESCNTTTEDEDLK_1xCarbamidomethyl [C6]	NM_001320898.1_1
DENSVELTMAEGPYK_	Q14697-2		LDSADANFSVWIK_	Q9Y2Z0-2					GTELDDGIQADSGPINDTDANPR_	NM_001267057.1_2
DENSVELTMAEGPYK_1xOxidation [M9]	Q14697-2		LDVPEDLR_	Q06787					GTITVSAQELK_	NM_152928.2_1
DEPCSSTSRPALEEDVIYHVK_1xCarbamidomethyl [C4]	Q96T88		LDVSNVATDTER_	P50851-2					GTQCVEQIQELVLR_1xCarbamidomethyl [C4]	NM_016567.3_2
DEPGAWEETFK_	Q14697-2		LDYWEDDLR_	P50851-2					GVCSCVEAGK_2xCarbamidomethyl [C3; C5]	NM_001130823.2_2
DEYAFLQK_	O00429		LEGDAALNR_	Q9Y2Z0					GVMAVTAVTATAASDR_	NM_001001520.2_2
DEYIEQLK_	Q14008		LEGQGDVPTPK_	Q9Y2Z0					GVSPEPIHLK_	NM_012062.4_2
DEYTFSPGK_	Q02880-2		LELLHPIIPEQSTFK_	Q9Y2Z0					GVVHDDMECSHYMK_1xCarbamidomethyl [C9]	NM_006838.3_2
DFDTALKHYDK_	P31948		LEQIAAEQK_	Q9UKM9					GYAFITFCGK_1xCarbamidomethyl [C8]	NM_001102399.2_3
DFGNSPLHR_	Q9UKA9-4		LESKPPSR_	Q7L2E3-2					GYDQSAYDGK_	NM_001243042.1_2
DFIDNLDRPPGSSYFR_	Q3YEC7		LEVSELATVK_	P46100					GYIGVVNR_	NM_004408.3_2
DFIHTASISFLTPLR_	Q9NR46-2		LFEELVR_	P14618-2					HAIPIIK_	NM_001302552.2_3
DFNMPLTISSLK_	Q96HC4-6		LFEMVLGPAAYNVPLPK_	Q16891-2					HDGSHEGTVYFK_	NM_001287801.1_2
DFQQALYELSYHVIK_	Q8NI27		LFIISTK_	P46100					HEADELSGDASVEDDAFIK_	NM_024755.3_3
DFTDIQQDFLPWK_	Q13330-3		LFQDFQMLSR_	P46100					HGHLCPIDTGLIEK_1xCarbamidomethyl [C5]	NM_001130823.2_2
DFTEDTIPR_	O95243-2		LFQQIYSDGSDEVK_	Q9Y2Z0					HGIPMSHVAR_	NM_004300.3_3
DGGPVTSQESGQK_	Q9BXW9		LGAFFLER_	Q9BRX5-3					HHPLHDFILELYQTGSTEPVEVPPELCHGIQGK_1xCarbamidomethyl [C27]	NM_012255.4_1
DGLGSDNIGSR_	P98175-5		LGGGMGSMNSVTGGMGMGLDR_	Q9P2K5-2					HINELSMK_	NM_022771.4_3
DGSDPYQEPK_	Q99447-3		LGSAMIGGFAGR_	Q9P2K5					HIPLAPGSDWR_	NM_001130823.2_2
DGSDYEGWCWPGSAGYPDFTNPTMR_1xCarbamidomethyl [C9]; 1xOxidation [M24]	Q14697-2		LHNMIVDLDNVVK_	Q16891-2					HLPGVCK_1xCarbamidomethyl [C6]	NM_001170544.1_1
DGVPEGAQLQGPVHR_	P16989-2		LIETTANMNSSYVK_	P46100					HLPSTEPDPHVVR_	NM_144732.4_1
DHAGVMGESNR_	P52306		LIFQEGKPVTEK_	P50851-2					HMTLDSFDAMFR_	NM_001037333.2_1
DHGLEVLGLVR_	Q9BRJ7		LIQEIVDK_	Q06787					HNDMADLER_	NM_001281303.1_2
DHNIPGELER_	P35580-3		LKDENGALIR_	O14974-4					HNDMADLER_1xOxidation [M4]	NM_006415.3_2
DHSPTPSVFNSDEER_	Q6UN15		LKEELEEAR_	Q04637-9					HNHWAGLYGR_	NM_001130823.2_2
DIELHLESSSHQETLDHIQK_	Q5BKZ1		LLAEMSSFCGDMEK_1xCarbamidomethyl [C9]	Q9BZZ5-2					HSQHYQIPDDFVADVR_	NM_033020.2_3
DIFTPNDER_	Q9NV70-2		LLAEMSSFCGDMEK_1xCarbamidomethyl [C9]; 2xOxidation [M5; M12]	Q9BZZ5					HTDDEMTGYVATR_	NM_139012.2_1
DIGKPEVEYDCDNLQHSK_1xCarbamidomethyl [C11]	Q9UPN9-2		LLLYDGK_	P50851-2					HTMMFSATFPK_	NM_001302552.2_3
DIHLDLPSNNNLVSK_	P18583-9		LLQCTR_1xCarbamidomethyl [C4]	Q9BZZ5-2					HYGFNEILK_	NM_022771.4_3
DIIEYAELK_	Q96F07-2		LLQDMDINR_	P50851-2					IAAGIFK_	NM_001288580.1_1
DIPVTIHNLEEYLR_	Q14669-2		LNTLVQK_	P46100					IADFGWSVHAPSLR_	NM_001313953.1_1
DISSTLIALADK_	Q13330-3		LPEEEVESSR_	Q15154-5					ICDPGLTSFEPEALGNLVEGMDFHK_1xCarbamidomethyl [C2]	NM_172171.2_1
DITDTLVAVTISEGAHHLDLR_	P42785-2		LPEMEPLVPR_1xOxidation [M4]	Q15154-5					ICYIFHETFGR_1xCarbamidomethyl [C2]	NM_012062.4_2
DKENALMPNWLHLPVGYHGR_1xOxidation [M7]	P16930		LPPMCVNPTPGGTISR_1xCarbamidomethyl [C5]	Q7L2E3					IDDIADGAVKPPPNK_	NM_001001520.2_2
DKFTDSAIAMNSK_	Q8WWM7-3		LPPMCVNPTPGGTISR_1xCarbamidomethyl [C5]; 1xOxidation [M4]	Q7L2E3					IDVEDILCK_1xCarbamidomethyl [C8]	NM_022771.4_3
DKHIEEVR_	P16949		LPSGEDYNLK_	Q9Y2Z0					IEGSGDQIDTYELSGGAR_	NM_001288739.1_2
DKLENEQEK_	O94880		LQASNVTNK_	Q9UKM9					IELLGSYDPQK_	NM_004300.3_3
DLAHTPSQLEGLDPATEAR_	O75909		LQATMETDDNIR_	P50851-2					IEQSQHLFQAHK_	NM_001025593.2_2
DLDELSR_	P43243		LQEALGMHESK_1xOxidation [M7]	Q7L2E3					IEYDAYR_	NM_001025593.2_2
DLDELSRYPEDK_	P43243		LQGINCGPDFTPSFANLGR_1xCarbamidomethyl [C6]	Q04637-9					IGLSDAR_	NM_032311.4_3
DLDELSRYPEDKITPENLPQILLQLK_	P43243		LQSNPSLEGVSHVIVDEVHER_	Q7L2E3-2					IGSVAPDTINNHVK_	NM_001321362.1_1
DLFPYDK_	Q7Z4V5		LQTASDESYKDPTNIQLSK_	Q13813-2					IHGVGFKK_	NM_000993.4_3
DLIHDQDEDEEEEEGQR_	Q9UNZ2-5		LQTASDESYKDPTNIQSK_	Q13813					IIYEQEGVYIHSSCGK_1xCarbamidomethyl [C14]	NM_022771.4_3
DLIVTPATILK_	P54687-5		LQYFAR_	Q9BZZ5-2					IKEEEAAKD_	NM_001130823.2_2
DLLTDEPFSR_	Q13356		LRGIEQAVQSHAVAEEEAR_	Q16891-2					ILDFGLAR_	NM_001315.2_1
DLMANATCFR_1xCarbamidomethyl [C8]	P18583-5		LSEQELQFR_	Q16891-2					ILGKPVMER_	NM_000156.5_1
DLPNIEVR_	P26358-2		LSLIMR_	Q06787					ILHNDPEVEK_	NM_001242559.1_2
DLSAAGIGLLAAATQSLSMPASLGR_	P43243		LSPVPVPR_	Q9UKM9					ILNVDNMK_	NM_022771.4_3
DLSAAGIGLLAAATQSLSMPASLGR_1xOxidation [M19]	P43243		LSTDDLNSLIAHAHR_	Q16891-2					ILQEAWTEGR_	NM_001034116.1_2
DLSLEEIQKK_	P16949		LTPVSLSNSPIK_	P46100					INEEISVK_	NM_144732.4_1
DLSLENGAHAYNR_	P26358-2		LVDQSGPPHEPK_	P55265-4					INQQEEPGFEVITR_	NM_022771.4_3
DLSTEEVR_	P78559-2		LVHPGVAEVVFVK_	Q9BY77					IPTEAPQLELK_	NM_001288580.1_1
DLTIGQMQGK_	Q9Y570		LVLDEDEETKEPLVQVHR_	P46100					ISAAMYK_	NM_001037333.2_1
DLTIPESSTVK_	Q49A26		LVTDQNISENWR_	P24666					ISQLAAVNR_	NM_033238.2_2
DLVLGPSGVLQGIRPGK_	Q49A26		LYEQILAENEK_	O14974-4					ISWVGEAVK_	NM_001130823.2_2
DLWYLETEKPPPPAR_	P51610-4		LYQYYLDHLTGVGNNSEGGR_	P46100					ITDSEASKPK_	NM_024755.3_3
DLYVNIQPVQEPK_	O00442		MCDHLIR_1xCarbamidomethyl [C2]	P50851-2					IVEQDTMPPK_	NM_001302552.2_3
DMLDSHLENK_	Q9GZT8		MDPVNNINVDK_	P50851-2					IVEQDTMPPK_1xOxidation [M7]	NM_004660.4_1
DMSALVAAR_	P26358-2		MEELVVEVR_1xAcetyl [N-Term]	Q06787					IVHSSMTR_	NM_001170544.1_1
DMSMLEER_	Q14008		MFFDALYDEDVVK_	Q04637-9					IVLAAQAISR_	NM_001034116.1_2
DMSQSPTSNFIR_	Q96BY6-3		MFFDALYDEDVVK_1xOxidation [M1]	Q04637-9					IYLILEYAPR_	NM_001313953.1_1
DNSEEFR_	Q8WWM7		MGFTELPLTGSTFHDQIAMLSHR_	P55265-2					IYVEIER_	NM_002816.4_3
DNTYLVELSSLLVR_	Q96JB5		MGFTELPLTGSTFHDQIAMLSHR_1xOxidation [M1]	P55265-2					KAIVICPTDEDLKDR_1xCarbamidomethyl [C6]	NM_144732.4_1
DNWLLAK_	Q8NI27		MGFTEVTPVTGASLR_	P55265-4					KEELSEEGYLAK_	NM_001130823.2_2
DPAEGDGAQPEETPR_	Q14697-2		MGFTEVTPVTGASLR_1xOxidation [M1]	P55265-4					KEPVDEDLYPEHYR_	NM_001130823.2_2
DPIDVDLPEEAER_	P29590		MGFTEVTPVTGASLRR_	P55265-4					KGADSLEDFLYHEGYACTSIHGDR_1xCarbamidomethyl [C17]	NM_001302552.2_3
DPNNLLNDWSQK_	O00232		MGPGIGAILER_	Q9P2K5					KGSLESPATDVFGSTEEGEKR_	NM_002816.4_3
DPPASASQVTGIR_	P26358-2		MGPGIGAILER_1xOxidation [M1]	Q9P2K5					KHEADELSGDASVEDDAFIK_	NM_024755.3_3
DPQQPAQQQQPAQQPK_	O75909-4		MITEHTSNDPYCFVEFYEHR_1xCarbamidomethyl [C12]	Q01085					KLELELEQAK_	NM_015885.3_3
DPSEEAAVLQYASLVGQK_	O95260		MITEQPDSR_	Q01085-2					KPAAVLKPSDWEK_	NM_012255.4_1
DQEVLLQTGR_	P52306		MITEQPDSR_1xOxidation [M1]	Q01085-2					KPAPVPAEPFDNTTYK_	NM_001001503.1_3
DQGSSALSGVGGIR_	Q13422		MLLEEIK_	P46100					KPDWDLK_	NM_001277074.1_2
DQPSLVQAIFNGDPDEVR_	O15084		MSDDISR_1xOxidation [M1]	P46100-2					KPQEESER_	NM_001130823.2_2
DRPASGSPFQLFLSK_	Q96T88		MSSSFDR_	Q9P2K5					KPQSSSTEPAR_	NM_001001520.2_2
DSAFSMESIDDYVNVPESGESAEASLDGSR_	O43561-3		MSSSFDR_1xOxidation [M1]	Q9P2K5					KQPPKEPSEVPTPK_	NM_001319077.1_2
DSAFSMESIDDYVNVPESGESAEASLDGSR_1xOxidation [M6]	O43561		MTVNNLHPR_	Q9BY77					KQPPVSPGTALVGSQK_	NM_001319079.1_2
DSAQESVITR_	Q5R372-3		MVLTLTQQNDESK_	Q15154-5					KQPPVSPGTALVGSQKEPSEVPTPK_	NM_001319079.1_2
DSDPVMAGIGEEIAHFQK_1xOxidation [M6]	P35658-5		NAGLAFIELVNEGR_	P50851-2					KQYPISLVLAPTR_	NM_001302552.2_3
DSEDVPMVLVGNK_	P01116-2		NCHHVIAR_1xCarbamidomethyl [C2]	Q8WUH1					KRNEDEDSPNK_	NM_000993.4_3
DSFDDR_	P43243		NDVNVEFSEK_	Q9Y2Z0					KRPYEENR_	NM_144732.4_1
DSFDDRGPSLNPVLDYDHGSR_	P43243		NEQESAVHPR_	Q9UJU6					KTEEERPQETTNQHSTK_	NM_001346413.1_3
DSGACFSASEPDAVHVVLDR_1xCarbamidomethyl [C5]	Q8NB37		NESPFWK_	P46013					KVVAEVYDQER_	NM_078480.2_2
DSGFSSGNTDTSSER_	Q9NYL2		NGPALQEAYVR_	Q9UJU6					KYGGPPPDSVYSGVQPGIGTEVFVGK_	NM_001102399.2_3
DSGYLHLLYK_	P35658		NHGIHTAHK_	P24666-2					KYGGPPPDSVYSGVQPGIGTEVFVGKIPR_	NM_001102399.2_3
DSKPSSTPR_	P06748		NIFLLFK_	P55265-4					KYPSIIVNCVEEKPK_1xCarbamidomethyl [C9]	NM_012255.4_1
DSLYVDGDCTMDIR_1xCarbamidomethyl [C9]; 1xOxidation [M11]	P35080		NLLNSVIGR_	Q7L2E3-2					LAGEELAGEEAPQEK_	NM_001001520.2_2
DSQDGSSYR_	Q14847		NLMQFHTVGTK_	Q7L2E3-2					LAGVTLGQR_	NM_001130823.2_2
DSQGHGRDLSAAGIGLLAAATQSLSMPASLGR_	P43243		NLPFDLTWQK_	Q9P2K5					LANLDLNSEK_	NM_001302552.2_3
DSSSVVEWTQAPK_	Q8TC07		NPASLPLTQAALK_	Q13428-3					LAPASNMTSQRPVSSTGINFDNPSVQK_	NM_020967.2_1
DSTSQHDDDNISTTSGFSSR_	P49790-3		NPLGSTHPEATLK_	P50851-2					LAQTLSTQLFQMVHTQR_	NM_001025593.2_2
DSYYSIHQIAQMGVGEGK_	Q9Y4P1		NRNEQESAVHPR_	Q9UJU6					LASGEITQDDFLVVVHQIR_	NM_015885.3_3
DTAVWLPR_	Q9UIS9-9		NSPQCPESMEVR_1xCarbamidomethyl [C5]	P50851-2					LASLGIK_	NM_001170544.1_1
DTEAPTAPQNSQLTWK_	Q13033-2		NYAAALETFTEGQK_	Q9Y2Z0					LCDSYEIRPGK_1xCarbamidomethyl [C2]	NM_001102399.2_3
DTEEPLPVK_	P18583-9		Peptide sequence + modifications	Master Protein Accessions					LDLMDEGTDAR_	NM_004408.3_2
DTGGDGQESLYK_	Q5R372-3		QAAAAACQLFK_1xCarbamidomethyl [C7]	Q7L2E3					LEEEALR_	NM_001277074.1_2
DTGLGDKPFPLDTAEEGPPSTAIQGTPPSVPGLGQEEHVMK_1xOxidation [M40]	P78559		QAAAHTDHLR_	Q16891-2					LEEPSLR_	NM_012062.4_2
DTGQLYAALHHR_	Q9H6Z4		QAAAHTDHLRDVLR_	Q16891-2					LEKEEEEGISQESSEEEQ_	NM_001319079.1_2
DTLQSELVGQLYK_	O00429		QAAPPIELDAVWEDIR_	O75400					LENGGFPYEK_	NM_032339.4_2
DTMSDLPEVR_	P26358-2		QAVPLFSK_	Q9BZZ5-2					LFEDDEHEK_	NM_001198656.1_3
DTNMGAWFEAQVVR_	Q96T88		QEAADAALR_	P55265-4					LFFIQACR_1xCarbamidomethyl [C7]	NM_001267056.1_2
DTNVMLVALAAK_	Q14008		QEGPATQVSK_	Q13428-3					LFFTSVPGGR_	NM_001286191.1_1
DTSEAPSSSDEK_	Q9UPN9		QFVADVK_	Q9Y2Z0					LFGNILDK_	NM_001130823.2_2
DTSENADGQSDENK_	P43243		QGLAETASPVAVSLR_	Q15154-5					LFLELEPQVR_	NM_001321089.1_1
DTSENADGQSDENKDDYTIPDEYR_	P43243		QGTTPPIWHLTDK_	P55265-4					LFSIVRPR_	NM_012255.4_1
DTSPSSGSAVSSSK_	Q8NEY8-2		QHITLALEK_	Q16891-2					LFTTMELMR_	NM_002816.4_3
DVFHTTVNFINQNLR_	P55957		QIPFHDVR_	Q06787					LGIIGVVNR_	NM_012062.4_2
DVGRPNFEEGGPTSVGR_	Q6Y7W6		QIYNPPSGK_	Q9BZZ5-2					LGLQYSQGLVSGSNAR_	NM_001034116.1_2
DVMEGVTVDDHMMK_1xOxidation [M]	Q5BKZ1		QLFAYPGCDAGIR_1xCarbamidomethyl [C8]	P50851-2					LHDAIVEVVTCLLR_1xCarbamidomethyl [C11]	NM_012062.4_2
DVMEGVTVDDHMMK_2xOxidation [M3; M12]	Q5BKZ1		QLGSILQDSLAK_	Q15154-5					LHPQLHR_	NM_033239.2_2
DVMEGVTVDDHMMK_3xOxidation [M3; M12; M13]	Q5BKZ1		QLNPESIRPGGPGGLSR_	Q7L2E3-2					LKGQEDSLASAVDAATEQK_	NM_001277074.1_2
DVTTFFSGK_	Q8N6T3		QLTQPETHFGR_	Q9UJU6					LLDLSSNQLIDENQLYLIAHLPR_	NM_003193.4_2
DWQEIIALYEK_	Q96JB5-4		QMAAEEAMK_	P55265-4					LLIESLEK_	NM_022771.4_3
DYEEMASR_	P29590		QMAAEEAMK_1xOxidation [M2]	P55265-4					LLIIASIGQLK_	NM_001287801.1_2
DYEVELLR_	P17480		QMAAEEAMK_2xOxidation [M2; M8]	P55265-4					LLLEGISSTHVNHLR_	NM_001287046.1_1
DYGHGSYGGQR_	Q5BKZ1		QNLYDLDEDDDGIASVPTK_	Q9BY77					LLSISGK_	NM_002520.6_2
DYGPGSYGGMDR_	Q5BKZ1		QPASQLQK_	Q16891-2					LMMDPLSGQNR_	NM_001102399.2_3
DYGPGSYGGMDR_1xOxidation [M10]	Q5BKZ1		QPPKEPSEVPTPK_	P17096-2					LMMDPLSGQNR_1xOxidation [M]	NM_001102399.2_3
DYTRPDLPSGDGQPALDPAIAAAFAK_	Q9UKA9-4		QQLVELVAEQADLEQTFNPSDPDCVDR_1xCarbamidomethyl [C24]	Q9BZZ5-2					LMMDPLSGQNR_2xOxidation [M2; M3]	NM_001102399.2_3
DYYEILGVSR_	Q9NXW2		QQNISMQR_1xOxidation [M6]	Q15154-5					LNLLHEFLQTEIK_	NM_001130823.2_2
EAAFDDAVEER_	Q09028		QQTTVPQKPR_	Q9BY77					LNNPGSTVFTEDCNILLK_1xCarbamidomethyl [C13]	NM_001130823.2_2
EAASILQELQVETYGSMEK_	O00232		QSTWEKPDDLK_	O75400					LNSLMSLVNK_	NM_002816.4_3
EADSVYGEWVPVEK_	P18583-9		QTASVTLQAIAAQNAAVQAVNAHSNILK_	Q16891-2					LPEYPQVDDLLLR_	NM_001034116.1_2
EAEEGEDDRDSANGEDDS_	P07910-2		QVSIEEGER_	P20340					LPLAQVSAHPWVR_	NM_001313953.1_1
EAEILSVLSHR_	Q9NYL2-2		QVTQLAIDTEER_	Q04637-9					LPLFPEPLHVFAPR_	NM_001130823.2_2
EAFDDAVEER_	Q09028-2		QWLNSGHINDVR_	O14974-4					LQAALEAEEPDDER_	NM_001321208.1_1
EAFWLGNLK_	Q9BXW9-1		REPHPAEAEK_	Q9P2K5					LQDLSSCITQGK_1xCarbamidomethyl [C7]	NM_033238.2_2
EAGSEPAPEQESTEATPAE_	Q6UN15		RLAPITSDPTEATAVGAVEASFK_	P14618					LQEVIETLLSLEK_	NM_002816.4_3
EALESVEVLIK_	Q14008		RPCTIQVPEPILR_1xCarbamidomethyl [C3]	Q7L2E3-2					LQFIADHCPTLR_1xCarbamidomethyl [C8]	NM_001321089.1_1
EANLLNAVIVQR_	Q9UNZ2-5		RPKEEEWDPEYTPK_	Q9NYF8					LQNFSYDQR_	NM_003915.5_3
EAQLFHPGDLQDLSNR_	Q8WWI1-3		RQDDLISSSVPSTTSTPTVTSAAGLQK_	O14974-4					LQTASDESYKDPTNIQLSK_	NM_001130438.2_1
EAVVDLHADDSR_	Q9UKV3-5		RVNSASSSNPPAEVDPDTILK_	Q9BY77					LQTASDESYKDPTNIQSK_	NM_003127.3_1
ECGNYPGFLTILR_1xCarbamidomethyl [C2]	Q8NI27		SAAAIALPPIAK_	P50851-2					LSIFDANESGFESYEALPQHK_	NM_001130823.2_2
ECSFCEDPR_2xCarbamidomethyl [C2; C5]	O94880		SAGAETDNAVPQGSK_	Q9BRX5					LSSGPFR_	NM_001130823.2_2
ECTIVPSNHYGPIPGIPVGTMWR_1xCarbamidomethyl [C2]	Q96T88		SASEHSSSAESER_	O75400					LSVDANLQIPK_	NM_015885.3_3
ECTIVPSNHYGPIPGIPVGTMWR_1xCarbamidomethyl [C2]; 1xOxidation [M21]	Q96T88-2		SDGSENLCTPQQSR_1xCarbamidomethyl [C8]	Q15154-5					LTALAEDRPLFDGPSRPSVAR_	NM_015885.3_3
EDAMAMVDHCLK_1xCarbamidomethyl [C10]	P43243		SDQWKPLNLEEK_	Q04637-9					LTELETAVR_	NM_006400.4_1
EDAMAMVDHCLK_1xCarbamidomethyl [C10]; 1xOxidation [M]	P43243		SDSGKPYYYNSQTK_	O75400					LTEQSNTPLLLPLAAR_	NM_133646.2_2
EDAMAMVDHCLK_1xCarbamidomethyl [C10]; 2xOxidation [M4; M6]	P43243		SDSPESDAER_	O75400					LTSLLEETLNK_	NM_001321362.1_1
EDDITELK_	P52306		SDVETIFSK_	Q9UKM9					LVGTPGAELLK_	NM_139012.2_1
EDEEEDEPVVIK_	Q9ULW0		SEESSHYSTEK_	P55265-4					LVHPGVAEVVFVK_	NM_032311.4_3
EDENAEPVGTTYQK_	Q16643-3		SEFEQNLSEK_	Q16891-2					LVMAGETTNSR_	NM_001130823.2_2
EDHPDLIQNAK_	P17480		SEIQAEQDR_	Q16891-2					LVTDQNISENWR_	NM_004300.3_3
EDIVDTMVFKPSDVMLVHFR_	Q8WWM7-3		SFGQTPSQLLIEPHPPR_	P50851-2					LWAEDGEFTSAR_	NM_001004065.4_3
EDSVKPGAHLTVK_	P51991		SGGSGHAVAEPASPEQELDQNK_	P46013					LWEAGWK_	NM_012255.4_1
EDTEEYNLR_	P51991		SGGTALHVAAAK_	O14974-4					LYALDVR_	NM_015885.3_3
EDVLAGMSGK_1xOxidation [M7]	Q02880-2		SGLQTDYATEK_	P46013					LYGPTNFAPIINHVAR_	NM_152928.2_1
EDYMTDLR_	Q96SK2-2		SGNILLHK_	Q7L2E3-2					LYNYFYDR_	NM_001313953.1_1
EEEELFPESERPEMLSEQEHMSISGSSAR_	Q9UHX1-2		SGSYSYLEER_	O14974-4					LYTDFDEIR_	NM_012062.4_2
EEELQGALAR_	P35580-3		SHGFAAEFK_	P55265-4					MADEAILQER_	NM_020967.2_1
EELLECIQQLVK_1xCarbamidomethyl [C6]	P54687		SLEDALR_	Q16891-2					MADEAILQER_1xOxidation [M1]	NM_020967.2_1
EEMIHNLQ_	O00232		SLELNPNNSTAMLR_1xOxidation [M12]	Q9Y2Z0					MDDSSVLEATR_	NM_001004065.4_3
EEMLALFLK_	Q6Y7W6		SLGLVDR_	Q7L2E3-2					MEIQEIQLK_1xOxidation [M1]	NM_001330344.1_2
EENEGYAK_	Q8NI27		SLKEEDGEEIVTYDHLCK_1xCarbamidomethyl [C17]	Q8WUH1					MESVFNQAIR_	NM_001037333.2_1
EEQEYEEEVEEEPRPAAK_	O43491		SLLEMEK_	O14974-4					MEVDYSATVDQR_	NM_002816.4_3
EESAADWALYTYEDGSDDLK_	Q16643-3		SLLSSTSTTTK_	O14974-4					MLDASGEK_	NM_001220768.2_2
EETGDEEDGSPIALHR_	P79522-2		SLQTVSGR_	Q9BZZ5-2					MLVLDSDK_	NM_139012.2_1
EETNHSEMAEDLCK_1xCarbamidomethyl [C13]	Q13422		SMWTEHK_1xOxidation [M2]	O75400					MLVLDSDKR_	NM_139012.2_1
EETNHSEMAEDLCK_1xCarbamidomethyl [C13]; 1xOxidation [M8]	Q13422		SNIDALLSR_	Q9UKM9					MNEIMDK_	NM_078468.2_2
EETSTCIATPDVEK_1xCarbamidomethyl [C6]	A8MW92-2		SNLHAMIK_	O75400					MQASIEKAH_	NM_001037738.2_2
EEVMVLER_	O75909		SPIAEAVFR_	P24666					MQASIEKGGSLPK_	NM_002520.6_2
EFFEYFGNFAFDK_	Q9NVV4		SPLIESTANMDNNQSQK_	O14974-4					MQASIEKGGSLPKVEAK_	NM_002520.6_2
EFGFSGLNVK_	Q14008		SPTDWALFTYEGNSNDIR_	Q9UJU6					MQGLMFR_	NM_032822.2_2
EFLESQEDYDPCWSLQEK_1xCarbamidomethyl [C12]	Q8N6T3-2		SPVDIVTGGISPVR_	P50851-2					MRPFEGFQR_	NM_144732.4_1
EFNPTKPLLSVNK_	Q8WWM7-3		SPVTTLLECMHK_1xCarbamidomethyl [C9]	P55265-4					MSEESYFESK_	NM_133646.2_2
EFPVSSGSQHR_	P18583-9		SPVTTLLECMHK_1xCarbamidomethyl [C9]; 1xOxidation [M10]	P55265-4					MSGCDLGPDGR_1xCarbamidomethyl [C4]	NM_002117.5_2
EFSFLDILR_	Q8TC07		SSELQAIK_	Q9UKM9					MSVQPTVSLGGFEITPPVVLR_	NM_002520.6_2
EFVAVTGAEEDR_	Q9UNZ2-5		SSFSSDPDEK_	P46013					MSVQPTVSLGGFEITPPVVLR_1xOxidation [M1]	NM_002520.6_2
EGEIAMLGGVGEENEK_	Q8IUI8-2		SSFSSDPDESEGIPLK_	P46013-2					MTDQEAIQDLWQWR_	NM_002520.6_2
EGIFAVDTMLK_	Q14669-2		SSFSSDPDESEGIPLKR_	P46013-2					MTDQEAIQDLWQWR_1xOxidation [M1]	NM_002520.6_2
EGLDDQGLTK_	Q9UKA9-3		SSGASVTTQPTEFK_	Q9BY77					MTDQEAIQDLWQWRK_	NM_002520.6_2
EGLKDEEDFFDFK_	A8MW92-2		SSLVDEHPEDAEFEQK_	Q15154-5					MTDQEAIQDLWQWRK_1xOxidation [M1]	NM_002520.6_2
EGLQNMEAR_	P31948		SSPAAFINPPIGTVTPALK_	Q9BY77					MTVNNLHPR_	NM_032311.4_3
EGNKEPILVDFK_	P18583-5		SSQPLASK_	P17096-3					MYGCDLGPDGR_1xCarbamidomethyl [C4]	NM_001243042.1_2
EGPDLDRPGSDR_	Q7Z4V5		SSQQPVSEVSTIPCPR_1xCarbamidomethyl [C14]	Q15154-5					MYGCDLGPDGR_1xCarbamidomethyl [C4]; 1xOxidation [M1]	NM_001243042.1_2
EGSVLDILK_	P49790		STAVTTSSAK_	Q9UKM9					NAQKSNQNGKDSKPSSTPR_	NM_002520.6_2
EGVHGGGLNK_	P35080		STQGVTLTDLQEAEK_	O14974-4					NCAVEFNFGQR_1xCarbamidomethyl [C2]	NM_144732.4_1
EGVIEAGAFQGGQR_	P53367-2		STTLDAGNIK_	O75400					NCSSPEFSK_1xCarbamidomethyl [C2]	NM_152928.2_1
EGVMHQVK_1xOxidation [M4]	Q14669-2		SVFEPEDSSIVDNELWSEMR_	Q15154-5					NEDEDSPNK_	NM_001098577.2_3
EHGAVAVER_	Q9UNZ2-5		SVFEPEDSSIVDNELWSEMR_1xOxidation [M19]	Q15154-5					NEQESAVHPR_	NM_001014436.2_2
EHPDDGKHPDGGLYNK_	Q9UJU2		SVNPNKPATK_	Q06787					NFDVGHVPIR_	NM_006838.3_2
EHSPDSDAYNSGDDKNEK_	Q5T200-2		SVPHEEYR_	Q9P2K5					NFLEGDWK_	NM_001287046.1_1
EIAVHIGDR_	Q14008		SVPTTQCLDNSK_1xCarbamidomethyl [C7]	P46013					NFVGPPHFK_	NM_001037333.2_1
EIELENDLK_	Q15813-2		SVPVTVDDDDDDNDPENR_	P46100					NGPALQEAYVR_	NM_001014436.2_2
EIEQVYR_	Q8NEY8-2		SVTLGYLFSQGHLTR_	P55265-4					NHGIHTAHK_	NM_007099.3_3
EIFDSR_	P06733		SYLTPVRDEESESQR_	O14974-4					NIWVSGLSSNTK_	NM_024755.3_3
EIFDSRGNPTVEVDLFTSK_	P06733		SYVTDDGQGMGR_	Q06787					NKFDVDAADEK_	NM_012255.4_1
EIIPTSEFINSK_	Q14669-2		TAESQTPTPSATSFFSGK_	P55265-4					NKFDVDAADEKFR_	NM_012255.4_1
EITGSSLIQK_	Q86XI2		TATFQQR_	Q9BY77					NLGPINEWWITGFDGGEK_	NM_001130823.2_2
EIVEPELSIEVCEEK_1xCarbamidomethyl [C12]	Q14008		TAVEFLSK_	Q7L2E3-2					NLPVNFESFPLK_	NM_001322927.1_2
EIVNNVR_	Q02880-2		TAVEHATDEDILAK_	P50851-2					NLPVNFEVAR_	NM_017454.3_2
EKVEELIK_	Q02880		TDHPEIGEGKPTPALSEASSSSIR_	Q16891-4					NLQTVNVDEN_	NM_000993.4_3
ELACEVK_1xCarbamidomethyl [C4]	P35580-3		TDHPEIGEGKPTPALSEEASSSSIR_	Q16891-2					NMDTSAVLAEIPAGPGR_	NM_001321362.1_1
ELADESQTLK_	Q9UNZ2-5		TGSDFSMFEALR_	Q15154-2					NNLNPTWK_	NM_152928.2_1
ELAEAASK_	Q8NEY8-2		TGSYGALAEITASK_	O14974-4					NPEVEFCGYTTTHPSESK_1xCarbamidomethyl [C7]	NM_015972.3_1
ELAFLEAAR_	Q99447		TIQNLYDLDEDDDGIASVPTK_	Q9BY77-2					NQLCDLETK_1xCarbamidomethyl [C4]	NM_001130823.2_2
ELAPAWEDTSPEQDNR_	P78559		TIQVPQQK_	Q9BY77					NRNEQESAVHPR_	NM_001014436.2_2
ELCQQIHAECK_2xCarbamidomethyl [C3; C10]	Q86XP3-2		TLPDEVLTK_	Q9BZZ5-2					NSAAEIPVTSNGEVDDSR_	NM_001025595.2_2
ELDPTNMTYITNQAAVYFEK_	P31948		TLPLTGSTFHDQIAMLSHR_	P55265-4					NSTSSIEPR_	NM_145687.3_2
ELDPTNMTYITNQAAVYFEKGDYNK_	P31948		TLQNTSSEGSR_	Q06787					NTDVVATLK_	NM_001001520.2_2
ELEAELEDERKQR_	P35580-3		TLVNKEEPPKELPAAEPVLSPLEGTK_	Q9BY77					NTDVVATLKK_	NM_001001520.2_2
ELFDLALR_	Q96F07-2		TMLLLSR_	P55265-4					NVASGGGGVGDGVQEPTTGNWR_	NM_012062.4_2
ELLDLAMQNAWFR_	Q86XP3		TMLLLSR_1xOxidation [M2]	P55265-4					NVESGEEELASKLDHYK_	NM_001170544.1_1
ELLEAVDAR_	P29590		TMYLEDR_	P20340-2					NVISSSSFK_	NM_001321089.1_1
ELLQHQFLK_	Q13153		TNAVSEIK_	Q9UJU6					NYILDQTNVYGSAQR_	NM_144732.4_1
ELQAQIAELQEDFESEK_	P35580-3		TPAEQLLSK_	O75400					NYIQSLTQMPK_	NM_139012.2_1
ELSFGR_	Q15084-2		TPLRPLDPTR_	Q04637-9					NYVPEDEDLKKR_	NM_001277074.1_2
ELSQGGCMSSFR_1xCarbamidomethyl [C7]	Q96SK2-2		TPVQYSQQQNSPQK_	P46013					Peptide sequence + modifications	Master Protein Accessions
ELVELSQASPHDISNVLK_	Q92619-2		TPWLYEQEGEVEKPFIK_	Q15154-5					QAAYEMR_	NM_012255.4_1
ELVLSSPEDLTQDFEEMK_	P78559		TQPSSGVDSAVGTLPATSPQSTSVQAK_	Q13428-3					QAFAPFGPIK_	NM_014281.4_2
ELVLSSPEDLTQDFEEMK_1xOxidation [M17]	P78559		TRDDGDEEGLLTHSEEELEHSQDTDADDGALQ_	Q9UKM9					QALPQVR_	NM_152928.2_1
ELVQTVLAR_	P56377-2		TSEEFVHINR_	P50851-2					QEIENETER_	NM_012062.4_2
EMIFEVLAPLAENDAIK_	P52306		TSSAETPTIPLGSAVEAIK_	Q16891-2					QESTVMVLR_	NM_014281.4_2
EMIFEVLAPLAENDAIK_1xOxidation [M2]	P52306		TTDGSLQNTSSEGSR_	Q06787-7					QEVPSWLENMAYEHHYK_	NM_001302552.2_3
EMQFLMQK_	P78559-2		TVEGALKER_	Q16891-2					QGAPTSFLPPEASQLKPDR_	NM_144732.4_1
ENPEFDLHFEK_	Q9NV70-2		TVFSADPNVVDLHK_	Q9BRX5-3					QIDLVDNYFVK_	NM_033020.2_3
ENQQATSGPNQPSVR_	P16989-2		TWEQQQEVVSR_	Q9UJU6					QISYNYSDLDQSNVTEETPEGEEHHPVADTENK_	NM_001018067.1_2
ENQWFDVGVIK_	P51610-4		TYDETYQR_	O14974-4					QISYNYSDLDQSNVTEETPEGEEHHPVADTENKENEVEEVK_	NM_001018067.1_2
ENVKPSGR_	Q8NI27		TYYYNTETK_	O75400					QIVDAQAVCTR_1xCarbamidomethyl [C9]	NM_033238.2_2
ENVPPGPEVCITHQEGEK_1xCarbamidomethyl [C10]	Q9UHB6-5		VAAALPGMESTQDR_	P20340-2					QLFQYQEGVR_	NM_015885.3_3
ENVTVLDK_	Q86XI2		VAAALPGMESTQDR_1xOxidation [M8]	P20340					QLLELQQK_	NM_015885.3_3
EPEAAGPVGTEPTVETLEPLGVLFPSTTK_	O15446-2		VAGCSVHK_1xCarbamidomethyl [C4]	Q9UKM9					QLTQPETHFGR_	NM_001014436.2_2
EPEDEEEEEEEEEEDEDEDLEELEVLER_	Q9NQC3-2		VAGTGEGGLEEMVEELNSGK_	Q9UJU6					QNQFYDTQVIK_	NM_144732.4_1
EPILVDFK_	P18583-5		VAMIDETR_	Q16891-2					QPLGATSGASLK_	NM_020967.2_1
EPTPSIASDISLPIATQELR_	A0FGR8-2		VANEAEFILSR_	P50851-2					QPPKEPSEVPTPK_	NM_001319077.1_2
EPTPYPDER_	P78559		VAQDWLK_	Q16891-2					QPPVSPGTALVGSQK_	NM_001319079.1_2
EPTSSEQGGLEGSGSAAGEGKPALSEEER_	Q04323-2		VASPSPSGSVLFTDEGVPK_	P56181-2					QPSSSSSEDSDEEWR_	NM_001286192.1_1
EPVDEDLYPEHYR_	P26358-2		VDCNNER_1xCarbamidomethyl [C3]	Q06787					QQLDSCVTK_1xCarbamidomethyl [C6]	NM_001329752.1_1
EPWLLPSQHNDIIR_	Q14697-2		VDSAATSGYEIGNPPDYR_	P24666					QQLLQEQQLR_	NM_001242559.1_2
EQEEELR_	Q7Z4V5		VEDAADSATKPENLSSK_	P46013					QQTTVPQKPR_	NM_032311.4_3
EQFASTNIAEELVK_	P52306		VENGQEPVIK_	P55265-4					QSSGSSSSGFGASR_	NM_004660.4_1
EQFWEQAK_	Q16643-3		VEYTLGEESEAPGQR_	Q04637-9					QTIAHQQQQLTNLQMAAQR_	NM_014281.4_2
EQHQHSDLDSNQTHSSGTVTSSSSTANIDDLK_	Q14008		VFIGNLNTAIVK_	Q9UKM9					QTNNQNWGSQPIAQQPLQGGDHSGNYGYK_	NM_001159675.1_3
EQIVTIGNKPVETIGFDSIMK_	Q15813-2		VFISNIPYDMK_1xOxidation [M10]	Q9P2K5					QTTITSHFAK_	NM_001130823.2_2
EQIVTIGNKPVETIGFDSIMK_1xOxidation [M20]	Q15813		VGEVTYVELFK_	Q9P2K5					QVHQCIER_1xCarbamidomethyl [C5]	NM_001329752.1_1
EQMDQISESNHLIHLSNTNNVK_	Q9NV70-2		VGIQQGLLSQSTR_	Q9BY77					QWKPQLGFNR_	NM_012255.4_1
EQQIEEHR_	Q16643-3		VGVGTSFGLPQTR_	P50851-2					QYFEEIQR_	NM_020967.2_1
EQSELDQDLDDVEEVEEEETGEETK_	P55209		VIATLLR_	P50851-2					QYNEEGR_	NM_144732.4_1
EQSIFGDHR_	Q16643-3		VLAGQTLDINMAGEPKPDRPK_	Q9UKM9					REPLSLINVR_	NM_001170544.1_1
EQVLEPMLNGTDK_	Q02880		VLAGQTLDINMAGEPKPDRPK_1xOxidation [M11]	Q9UKM9					RFDAERPVDCSVIVVNK_1xCarbamidomethyl [C10]	NM_020967.2_1
EQVLEPMLNGTDK_1xOxidation [M7]	Q02880-2		VLEDVTGEEFVLFMK_	Q9BZZ5-2					RIHGVGFK_	NM_000993.4_3
ERDSELSDTDSGCCLGQSESDK_2xCarbamidomethyl [C13; C14]	Q96T88		VLVASSVVAGESQKPELK_	Q06787					RKPQEESER_	NM_001130823.2_2
ERPGLGSENMDR_	Q86XP3		VMYAFCR_1xCarbamidomethyl [C6]	Q9UJU6					RPHPQHSQQPPPPQQER_	NM_001242559.1_2
ERPPDHQHSAQVK_	A0FGR8-2		VNSASSSNPPAEVDPDTILK_	Q9BY77					RPLEMEQQQAYRPEMK_	NM_144732.4_1
ERPVQSLK_	Q8NEY8-2		VPSNASWEQAMK_	O75400					RPLEMEQQQAYRPEMK_2xOxidation [M5; M15]	NM_144732.4_1
ESADFWCFECEQLLCAK_3xCarbamidomethyl [C7; C10; C15]	P29590		VPSNASWEQAMK_1xOxidation [M11]	O75400					RPLILQLVHVSQEDK_	NM_012062.4_2
ESATADAGYAILEK_	P98175-5		VPTTEKPTVTVNFR_	Q04637-9					RPYEENR_	NM_144732.4_1
ESDQTLAALLSPK_	P18583-9		VQAAQSEAK_	Q16891-2					RTDEEGKDVPDHAVLEMK_	NM_144732.4_1
ESFTPTEEHVLVVR_	Q9NXE4-2		VQDGLSDIAEK_	P46100					RVNSASSSNPPAEVDPDTILK_	NM_032311.4_3
ESLAESAAAYTK_	Q9H6Z4		VQEQELK_	Q16891-2					SAAGNRAEATESAMER_	NM_002137.3_3
ESPADAK_	P38159-2		VSCLETVWVSR_1xCarbamidomethyl [C3]	Q7L2E3-2					SAMAAVLAMR_	NM_033238.2_2
ESQLQQEDPMDR_	Q5R372-3		VSGNPQVHIK_	P46013					SATLLQLITK_	NM_012062.4_2
ESTDDESNPLGR_	Q14669-2		VSIYDSK_	P55265-4					SCTFDEQR_1xCarbamidomethyl [C2]	NM_001313953.1_1
ESTFLDEGPDDEQEVPLR_	P78559		VTEEDIVELFCVCGALK_2xCarbamidomethyl [C11; C13]	Q9BY77					SDESIKEEDKDQDEK_	NM_001130823.2_2
ESVLTATSILNNPIVK_	Q5BKZ1		VTFEIHK_	P50851-2					SDGEAKPEPSPSPR_	NM_001379.3_2
ESYDYNPNK_	O75530-2		VTVPLVR_	Q9UKM9					SDPFLEFFR_	NM_152928.2_1
ETFVQAVSK_	Q86XI2		VVDQQQVER_	P46100					SDTYYQSPTGDR_	NM_001204143.1_2
ETIMNQEK_	P20290		VVEATNSVTAVR_	P46100					SDYDGIGNR_	NM_004660.4_1
ETIMNQEK_1xOxidation [M4]	P20290		VVNYLPR_	P50851-2					SEEMDMDHIMTWATDVAK_	NM_133646.2_2
ETITAPVPFDFTHK_	Q96RP9		VVQNDAYTAPALPSSIR_	Q9BY77					SEGFSMDR_	NM_001001520.2_2
ETKPEPMEEDLPENKK_	P31948		VVSQYHELVVQAR_	Q16891-2					SENQEFYQDTFGQQWK_	NM_001159675.1_3
ETLFNTLANNR_	P35658		VWVDTLSITHSK_	P50851-2					SFEDPPNHAR_	NM_001130823.2_2
ETNFQVMQMK_	Q14008		WAEEFNDETNVR_	P46100					SFVIDHQR_	NM_001281303.1_2
ETPHSPGVEDAPIAK_	Q9UHB6-5		WDSHFR_	Q16891-2					SGELNGDQVSLGTK_	NM_001286191.1_1
ETSVTPSNLWGGQGLLGVSIR_	Q9H8Y8-3		WHHEYQTR_	P50851-2					SGGGGYSQNR_	NM_144732.4_1
EVAATEEDVTR_	Q8WWI1		WIGSETDLEPPVVK_	O14974-4					SGLKHEDKR_	NM_015640.3_2
EVEDKESEGEEEDEDEDLSK_	O95218-2		WIYEDVER_	O43852-3					SHFIVALK_	NR_132731.1_1
EVFRPLKPADLTALAK_	O95819-6		WLFTEIR_	P50851-2					SHTGERPFQCNQCGASFTQK_2xCarbamidomethyl [C10; C13]	NM_001220768.2_2
EVFRPLKPAGEVDLTALAK_	O95819-3		WVSELSYVEEK_	Q15154-5					SIALTQAR_	NM_001281303.1_2
EVGFALQEDQDVR_	Q96BY6-3		YESASMSSTCEPCK_2xCarbamidomethyl [C10; C13]; 1xOxidation [M6]	Q15154-5					SIDMSWDSVTMK_1xOxidation [M11]	NM_014281.4_2
EVNFTSELR_	Q9ULW0-2		YESWEDDQVPK_	P50851-2					SIDMSWDSVTMK_2xOxidation [M4; M11]	NM_078480.2_2
EVSTAPAGTDMPAAK_1xOxidation [M11]	O75530-2		YFGGCPVIK_1xCarbamidomethyl [C5]	Q7L2E3-2					SKAECEILMMVGLPAAGK_1xCarbamidomethyl [C5]	NM_144732.4_1
EWDLLNENIMLLSK_	O00232		YFLHDDR_	Q9NYF8					SLDQAISR_	NM_001037333.2_1
EWEEAMAK_	Q8WWI1-3		YFLHDDRDDGVDYWAK_	Q9NYF8					SLELHEEFGYNADTQK_	NM_001025593.2_2
EWLVGMLGAESTK_1xOxidation [M6]	Q02880-2		YGPDAFFNFPGK_	P50851-2					SLQEQADAAEER_	NM_001330344.1_2
EWSLESSPAQNWTPPQPR_	Q8N6T3-2		YLILPVHSNIPMMDQK_	Q7L2E3-2					SLQQVDEHSKPPHLR_	NM_015885.3_3
EWSQHINGASHSR_	P43243		YLNTNPVGGLLEYAR_	P55265-4					SLSQSFENLLDEPAYGLIQK_	NM_001146213.1_3
EYADSFGK_	Q99447		YQEQGGEASPQR_	Q9UJU6					SLVDIDLSSLR_	NM_001242559.1_2
EYEEIMR_	P17480		YQEQGGEASPQSR_	Q9UJU6-2					SNQTMGWGEK_1xOxidation [M5]	NM_001242559.1_2
FACFER_1xCarbamidomethyl [C3]	Q00325-2		YSSNLGNFNYER_	Q9BZZ5-2					SNVQPTAAPGQK_	NM_001313953.1_1
FAEFEDFPETSEPVWILGR_	Q9Y4P1-2		YSTSGSSGLTTGK_	Q16891-2					SPGHMVILDQTK_	NM_024755.3_3
FAEGLEK_	Q92619-2		YYMSDDISR_	P46100					SPGHMVILDQTK_1xOxidation [M5]	NM_024755.3_3
FAIETVK_	Q9NVV4-2								SPIAEAVFR_	NM_004300.3_3
FALSAMDMEQR_	O94925								SPQPPAEEDEDDFDDTLVAIDTYNCDLHFK_1xCarbamidomethyl [C25]	NM_144732.4_1
FATEYCNTIEGTAK_1xCarbamidomethyl [C6]	O00429								SPTDWALFTYEGNSNDIR_	NM_001014436.2_2
FDFPVSYLPGPVK_	Q9NXE4-2								SQACEPSEPEIEIK_1xCarbamidomethyl [C4]	NM_001130823.2_2
FDGLLGFPGGFVDR_	Q9BRJ7-2								SQGGEPTYNVAVGR_	NM_002628.4_2
FDLQVEHPYQFLLK_	O75909								SQLDINNK_	NM_012062.4_2
FDSEPSAVALELPTR_	P18583-9								SQVDEEFLK_	NM_021075.3_3
FDSEYER_	P43243								SRDPPASASQVTGIR_	NM_001130823.2_2
FEIEYQGDPELQPIR_	Q9NXE4-2								SRPGPSLQIQDLK_	NM_015885.3_3
FFAPECGR_1xCarbamidomethyl [C6]	Q96HC4-6								SSFSHYSGLK_	NM_001018067.1_2
FFDTNTSVLMK_	Q14008								SSFSHYSGLKHEDKR_	NM_001018067.1_2
FFGQHDR_	Q9ULU4-12								SSFVPSLFSK_	NM_001267056.1_2
FFGTEDHAWIK_	Q49A26								SSGASVTTQPTEFK_	NM_032311.4_3
FFLLENVR_	P26358-2								SSLEEHKER_	NM_001220767.2_2
FFQDHK_	Q9UKA9-4								SSPAAFINPPIGTVTPALK_	NM_032311.4_3
FFQEENTEK_	O00232								SSTDSLPGELR_	NM_001348149.1_1
FFSFIEGCLVK_1xCarbamidomethyl [C8]	O95819-3								SSTDSLPGPISR_	NM_020967.2_1
FGAVWTGDNTAEWDHLK_	Q14697-2								SSVLENFVGR_	NM_004408.3_2
FGDSQQLR_	Q9UPN3								SSVLESLVGR_	NM_012062.4_2
FGFIFNCDIK_1xCarbamidomethyl [C7]	O00442								SVETGHLDGVFMHK_	NM_001242559.1_2
FGGSYGGR_	Q5BKZ1								SVETGHLDGVFMHK_1xOxidation [M12]	NM_001242559.1_2
FGLHGSSGK_	Q9NV70-2								SVTDSIRDEYAFLQK_	NM_012062.4_2
FGPYESYDSR_	Q5BKZ1								SYFLIVR_	NM_012062.4_2
FGQYAGHVVPTILEK_	Q14008								SYLQDPIWR_	NM_001037333.2_1
FGVSSESKPEEVKK_	P49790								TADDSATSDYCPAPK_1xCarbamidomethyl [C11]	NM_006892.3_3
FGVSSSSSGPSQTLTSTGNFK_	P49790								TAIPFTQEPQR_	NM_001037333.2_1
FHTSTYDLPGPEGAGPFEASQPADSAVPATSGK_	P78559								TALEMVQAAGTDR_	NM_015972.3_1
FIFDVGTR_	O75909								TALEMVQAAGTDR_1xOxidation [M5]	NM_015972.3_1
FINYVK_	P06748								TASDMVSTSR_	NM_002816.4_3
FKPVIGTWDCDTCLVQNKPEAIK_2xCarbamidomethyl [C10; C13]	P49790								TASDMVSTSR_1xOxidation [M5]	NM_002816.4_3
FLCCMLETVTR_2xCarbamidomethyl [C3; C4]	Q8NI27								TATFQQR_	NM_032311.4_3
FLESLPEEEQQR_	P17480								TATIMEELADALMYCHGK_1xCarbamidomethyl [C15]	NM_001313953.1_1
FLFEILSSFDNEQQR_	Q14669-2								TDEEGKDVPDHAVLEMK_	NM_144732.4_1
FLIEACK_1xCarbamidomethyl [C6]	O94925								TDEEGKDVPDHAVLEMK_1xOxidation [M16]	NM_144732.4_1
FLLETVVR_	Q5R372-3								TDGFDEFK_	NM_033238.2_2
FLQLCIFPR_1xCarbamidomethyl [C5]	Q8NI27								TEEERPQETTNQHSTK_	NM_001346413.1_3
FLSNGYIPIPGQQDK_	P35580-3								TEIIPDR_	NM_002861.4_2
FLWNQVR_	Q8IW35								TELHGQLISVEK_	NM_024755.3_3
FLYESSSR_	Q86XI2								TEVMALVPPADCR_1xCarbamidomethyl [C12]	NM_000156.5_1
FMNPFNMPNLYQK_	P31948								TGGYLTESGYVNLQR_	NM_012255.4_1
FMVVDNPQK_	Q8WWW0-2								TGLFTPDMAFETIVK_	NM_004408.3_2
FMYFQR_	Q96F07-2								TGYESGEYEMLGEGLGVK_	NM_006400.4_1
FNEADSEVAQAGK_	Q9UPN9-2								TGYESGEYEMLGEGLGVK_1xOxidation [M10]	NM_001348065.1_1
FNQDPEAVDEDR_	O95260-2								THSVGKPHK_	NM_001220767.2_2
FPSGSVLTGTLSVLK_	Q15813-2								TICDWEGGR_1xCarbamidomethyl [C3]	NM_001037333.2_1
FPVIQHFK_	Q15257								TIEDTLMTVK_	NM_001025593.2_2
FQEEVLAK_	Q8N9N2-2								TIEEQLDEEHLESHK_	NM_001004065.4_3
FQLNLDK_	Q9ULU4-12								TIEEQLDEEHLESHKK_	NM_001004065.4_3
FQMQVLPQCGHAVHEDAPDK_1xCarbamidomethyl [C9]	Q9Y570								TIMHLMINNTK_	NM_004408.3_2
FQQAVDAVEEFLR_	Q49A26								TIQNLYDLDEDDDGIASVPTK_	NM_178136.2_3
FQTTYGSR_	P51809								TIQVPQQK_	NM_032311.4_3
FQYQLACR_1xCarbamidomethyl [C7]	Q96SK2-2								TIWEVPER_	NM_139012.2_1
FREDHPDLIQNAK_	P17480								TLETVPLER_	NM_031243.2_3
FSELVMK_	Q14008								TLFPGTDHIDQLK_	NM_139012.2_1
FSEMQNER_	Q9NVV4-2								TLGDTGFMPPDK_1xOxidation [M8]	NM_001170543.1_1
FSFSGNTLVSSSADPEGHFETPIWIER_	Q14697-2								TLGHVMPR_	NM_012255.4_1
FSHHMIPGPPGPHTTGIPHPAIVTPQVK_	Q9UJU2								TLLEKPK_	NM_001267056.1_2
FSHHMIPGPPGPHTTGIPHPAIVTPQVK_1xOxidation [M5]	Q9UJU2								TLLVNCQNK_1xCarbamidomethyl [C6]	NM_022771.4_3
FSKPIGDFK_	P49790								TLQLEYR_	NM_152928.2_1
FSQELLSNGELNHLPLK_	P17480								TLSMIEEEIR_	NM_001004065.4_3
FSSPIVK_	P49790								TLVNKEEPPKELPAAEPVLSPLEGTK_	NM_032311.4_3
FSSQEKPR_	Q96BY6-3								TLYTQIR_	NM_001321089.1_1
FTDSAIAMNSK_	Q8WWM7-3								TMCGTLDYLPPEMIEGR_1xCarbamidomethyl [C3]	NM_001313953.1_1
FTEDSLLR_	P26358-2								TMCGTLDYLPPEMIEGR_1xCarbamidomethyl [C3]; 1xOxidation [M2]	NM_001313953.1_1
FVAELWK_	P35580-3								TNAVSEIK_	NM_001014436.2_2
FVASKPLEEEEMEVPVLPK_	P49790								TNDQDGLISGILR_	NM_022771.4_3
FVELVHQQK_	Q8NI27								TPAEVVSTCDITFACVSDPK_2xCarbamidomethyl [C9; C15]	NR_136697.1_3
FVFETPFTLSGK_	Q96BY6-3								TPGQINLAQLR_	NM_033020.2_3
FVFGQNMSER_	Q9H6Z4								TSFFLGEVGNAAK_	NR_136697.1_3
FVQEEAFR_	Q8IW35								TSMFPSLK_	NM_001287801.1_2
FVQSTQNNGTLK_	Q96BY6-3								TTGEENGVEAEEWGK_	NM_012062.4_2
FVSNITR_	P26358-2								TTHLIAK_	NM_002816.4_3
FVVPKPR_	Q00325-2								TVIIHDRPDITHPR_	NM_024755.3_3
FYFLEAYNAK_	P26358-2								TVMLIPGDK_	NM_078468.2_2
FYQEPNGETPSSLYR_	Q8NI27								TVSLGAGAK_	NM_002520.6_2
FYRPENTHK_	P26358-2								TVSLGAGAKDELHIVEAEAMNYEGSPIK_1xOxidation [M20]	NM_002520.6_2
GAEAANVTGPDGVPVEGSR_	P16989-2								TWEQQQEVVSR_	NM_001014436.2_2
GAEGILAPQPPPPQQHQERPGAAAIGSAR_	Q8WWM7-3								VAGTGEGGLEEMVEELNSGK_	NM_001014436.2_2
GAIENLLAK_	Q9UPN9-2								VAIFTLINEINK_	NM_015906.3_3
GALYCELCYEK_2xCarbamidomethyl [C5; C8]	Q96HC4								VAIFTLINEINKK_	NM_033020.2_3
GAPPSSNIEDFHGLLPK_	P43243								VARPLPAEEPER_	NM_001130823.2_2
GAQYQPILR_	P26358-2								VASGGGGVGDGVQEPTTGNWR_	NM_001278463.1_2
GAVTGHEECVDALLQHGAK_1xCarbamidomethyl [C9]	O15084								VASPSPSGSVLFTDEGVPK_	NM_021075.3_3
GCQTQEDCGHCPICLRPPRPGLR_4xCarbamidomethyl [C2; C8; C11; C14]	Q9UIS9-9								VASVDSAVAATTPTSMATVQK_1xOxidation [M16]	NM_001286192.1_1
GDAAVRDELMAAVR_	Q15008-4								VDNDENEHQLSLR_	NM_002520.6_2
GDADQASNILASFGLSAR_	P43243								VDSAATSGYEIGNPPDYR_	NM_004300.3_3
GDDLQAIK_	P07910-2								VEEFLYEK_	NM_001287046.1_1
GDDLQAIKK_	P07910-2								VEFILEQMR_	NM_002816.4_3
GDDQLELIK_	P07910-2								VETQSDEENGR_	NM_001220768.2_2
GDDQLELIKDDEK_	P07910-2								VGIQQGLLSQSTR_	NM_032311.4_3
GDDQLELIKDDEKEAEEGEDDR_	P07910-2								VGNLGLATSFFNEK_	NM_001302552.2_3
GDEILAATMK_	Q13356								VGRPSNIGQAQPIIDQLAEEAR_	NM_014281.4_2
GDEVMVELAENGK_	P35580-3								VHEEVVLK_	NM_015885.3_3
GDLEVATVSEK_	P30622-2								VIIYQEK_	NM_014281.4_2
GDYPQAMK_	P31948								VLDENLADPQAEDRPLVFFDLK_	NM_033238.2_2
GEAVQEELLK_	Q14008								VLEQLEDLDSR_	NM_001130823.2_2
GEDKDEGPVAEQVK_	Q8WWM7								VLHPEQHR_	NM_001130823.2_2
GEEGHDPKEPEQLR_	P51991								VLVFVMGK_	NM_053024.3_2
GEEVTLSNPK_	Q14669-2								VLVLNQTGITWAEVLR_	NM_003193.4_2
GEFLAPPR_	Q8WWI1-3								VLYYSATK_	NM_001130823.2_2
GEFLHLCR_1xCarbamidomethyl [C7]	Q8NI27								VMDVTEDEEEEIK_1xOxidation [M2]	NM_001242559.1_2
GEGPEAGAGGAGGR_	A0FGR8-2								VMENSSGTPDILTR_	NM_001313953.1_1
GELLALVK_	Q96JB5								VMENSSGTPDILTR_1xOxidation [M2]	NM_001313953.1_1
GENPFEIQDHSQDQQIEGDEEDEEK_	Q5BKZ1								VMYAFCR_1xCarbamidomethyl [C6]	NM_001014436.2_2
GEQLFLEPELVIPHR_	Q9NXE4-2								VNFGTDFLTAIK_	NM_001287801.1_2
GESAEDKEHEEGR_	Q7Z4V5								VNPQISDEKDEDEKEEK_	NM_001130823.2_2
GESLDNLDSPR_	Q8WWI1-3								VNSASSSNPPAEVDPDTILK_	NM_032311.4_3
GESPVDYDGGR_	Q15084-5								VPTLAVPAISLPDDVR_	NM_001130823.2_2
GEVPAELR_	Q9UNZ2-5								VQEAVESMVK_	NM_032822.2_2
GFAFVEFSHLQDATR_	P98175-5								VQEAVESMVK_1xOxidation [M8]	NM_001329752.1_1
GFAFVQYVNER_	P07910-2								VRPCVVYGGADIGQQIR_1xCarbamidomethyl [C4]	NM_001302552.2_3
GFAFVTFDDHDTVDK_	P51991								VRPSEEMLELEK_	NM_001004065.4_3
GFDQDMANK_	Q16881-5								VTEEDIVELFCVCGALK_2xCarbamidomethyl [C11; C13]	NM_032311.4_3
GFDQDMANK_1xOxidation [M6]	Q16881								VTEGLVDVILYHQPDDK_	NM_001297621.1_3
GFGYKGSCFHR_1xCarbamidomethyl [C8]	P62937								VTEGLVDVILYHQPDDKK_	NM_001297621.1_3
GFPFWPAK_	Q9ULU4-12								VTGLTEGLVDVILYHQPDDK_	NM_001102399.2_3
GFQQISFVNSIATTK_	Q02880-2								VTLATLK_	NM_002520.6_2
GFWYDAEISR_	Q96T88								VTNYIFDSLR_	NM_022771.4_3
GGCPGGEATLSQPPPR_1xCarbamidomethyl [C3]	P20290								VVEHNIR_	NM_002816.4_3
GGGFFSGLGGKPSQDAANK_	P35658								VVGERPFQCNQCGASFTQK_2xCarbamidomethyl [C9; C12]	NM_001220767.2_2
GGGGAGGTGVFK_	Q96BY6-3								VVGESLSPAFHLQLEESTGSR_	NM_001281303.1_2
GGIHTADTK_	O00442								VVQNDAYTAPALPSSIR_	NM_032311.4_3
GGSGSHNWGTVKDELTDLDQSNVTEETPEGEEHHPVADTENK_	Q8NC51-3								VVTMEVEAR_	NM_152928.2_1
GHAVNLLDVPVPVAR_	O00429								VVTMEVEAR_1xOxidation [M4]	NM_152928.2_1
GHETSALLILEK_	O15084								VVVISSSEDSDAENSSSR_	NM_033238.2_2
GHFTSLELVPPSTLTTTHLK_	Q9UPN3								VVVTVEQTEEELER_	NM_006415.3_2
GHMGDFGSIHRPGIVVDYQNK_	Q5BKZ1								VVWVEDLDKR_	NM_001302552.2_3
GHMGDFGSIHRPGIVVDYQNK_1xOxidation [M3]	Q5BKZ1								VWGNVGTVEWADPIEDPDPEVMAK_	NM_001159676.1_3
GHTNAGDAIYEVVSLQR_	Q5R372-3								VWGNVGTVEWADPIEDPDPEVMAK_1xOxidation [M22]	NM_001159676.1_3
GIFTAGLK_	Q96BW9-3								WAAVVVPSGQEQR_	NM_001243042.1_2
GIHVEVPPAEAER_	P38117								WDVLIQQATQCLNR_1xCarbamidomethyl [C11]	NM_144732.4_1
GILSMANSGPNSNR_	Q13356								WETPYMHALAAAASSK_	NM_000156.5_1
GIVDLIEER_	Q96RP9								WMGIAFR_	NM_144732.4_1
GKGFSVVADTPELQR_	Q14847								WMGIAFR_1xOxidation [M2]	NM_144732.4_1
GKPSSDTVPKPK_	Q02880								WQPTASEPVK_	NR_136697.1_3
GLDIPSIK_	Q86XP3								WSFDDVPMTPLR_	NM_078468.2_2
GLDSGAETEEEKDTWEEK_	P78559								WSLNTYK_	NM_001025593.2_2
GLDWDAGHLSNR_	O43189								WSTLVEDYGMELR_	NM_002816.4_3
GLEPVPIQHNGGSR_	Q9P287-2								WSTLVEDYGMELR_1xOxidation [M10]	NM_002816.4_3
GLFSANDWQCK_1xCarbamidomethyl [C10]	O95218-2								WVDEVVPAAPYVTTLETLDK_	NM_001184917.2_2
GLGVHLSFVR_	Q8N6T3								YADLPGIAR_	NM_006400.4_1
GLLEFEHQR_	Q14697-2								YAMEQSIK_	NM_014281.4_2
GLPPHLFGPLGPR_	Q14669-2								YAMEQSIK_1xOxidation [M3]	NM_078480.2_2
GLPPSMER_	P38159								YFWGNLPGMNR_	NM_175849.1_3
GLPPSMER_1xOxidation [M6]	P38159-2								YGAPEDWELK_	NM_001287801.1_2
GLSDTPYDSSASYEK_	Q13422								YGGPPPDSVYSGVQPGIGTECDSYEIRPGK_1xCarbamidomethyl [C21]	NM_001297621.1_3
GLYNEHTVDR_	Q6P6C2-1								YGGPPPDSVYSGVQPGIGTEVFVGK_	NM_001102399.2_3
GMGLSMGTMICGWDK_1xCarbamidomethyl [C11]	P28074								YGGPPPDSVYSGVQPGIGTEVFVGKIPR_	NM_001102399.2_3
GMQLHGVLR_	Q9BSJ8								YGQHPPDAVDEPQMLTNEK_	NM_001130823.2_2
GNECFQK_1xCarbamidomethyl [C4]	P31948-2								YGQHPPDAVDEPQMLTNEK_1xOxidation [M14]	NM_001130823.2_2
GNFNSTVNNTVTVR_	Q96BY6-3								YIETSELCGGAR_1xCarbamidomethyl [C8]	NM_012062.4_2
GNLGAGNGNLQGPR_	P43243								YIPPHLR_	NM_004660.4_1
GNNNVMSNYEAYKPSTGAMGDR_	Q86XP3								YLTAEETDK_	NM_020967.2_1
GNPTVEVDLFTSK_	P06733								YNILGTNAIMDK_	NM_144732.4_1
GNSTVYEWR_	Q96JB5								YPIFFFGTHETAFLGPK_	NM_001001520.2_2
GNVYIHPTAK_	Q96IJ6								YQEQGGEASPQR_	NM_001014436.2_2
GNYDEGFGHRPHK_	Q9UHB6-5								YQEQGGEASPQSR_	NM_014063.6_2
GPAEDMSSK_1xOxidation [M6]	Q14008-3								YSEAAELR_	NM_001004065.4_3
GPAPAPQQCSEPETK_1xCarbamidomethyl [C9]	Q3YEC7-2								YTRPTPVQK_	NM_001302552.2_3
GPFLVALGK_	Q96HC4-6								YVLEDGPEEDR_	NM_001287801.1_2
GPFSEISAFK_	P51610-4								YVVLCESPQDK_1xCarbamidomethyl [C5]	NM_022771.4_3
GPGLAPGQLYTYPAR_	Q92784-3								YYAFPQMITPLVTK_	NM_000156.5_1
GPGLYYVDSEGNR_	P28074								YYYQGCASWK_1xCarbamidomethyl [C6]	NM_012255.4_1
GPGPLQER_	P43243
GPLIPPLLSLPPPPWGR_	P79522
GPLPLSSQHR_	P43243
GPLPLSSQHRGDADQASNILASFGLSAR_	P43243
GPPVFTQEER_	Q99447
GPSLNPVLDYDHGSR_	P43243
GPSSVEDIK_	P06748
GPSYGEDVSNTTTAQK_	P29590
GQDWIALVK_	A8MW92-2
GQLQSHGVQAR_	P98175-5
GQVTALVSLK_	Q9P287-2
GRPAPGFHHGDGPGNAVQEIMIPASK_1xOxidation [M21]	Q96AE4-2
GSCFHR_1xCarbamidomethyl [C3]	P62937
GSDPSTHQRPPSEMADFLSDAIPGLK_	Q8TC07
GSEMDNNCSPTR_1xCarbamidomethyl [C8]; 1xOxidation [M4]	O95243
GSEVTAPVASDSSYR_	A8MW92
GSFSSENYWR_	Q6P6C2-1
GSLESPATDVFGSTEEGEK_	O00232
GSNLDAPEPYR_	P26358-2
GSPVNALQNK_	Q8NI27
GSQIDSHSSNSNYHDSWETR_	Q5T200
GSSASLVLKR_	Q00325-2
GSSGSVVVDLLYWR_	Q9NQC3-2
GSSYGVTSTESYK_	P98175-5
GSSYGVTSTESYKETLHK_	P98175-5
GSTAPVGGGAFPTIVEREPWDGR_	Q15084-5
GTEGMEPEEGVTVESQPQVK_1xOxidation [M5]	O15446-2
GTGDNENLVR_	O94880
GTMTEIYNDLSK_	Q9ULU4-12
GTPAYPESTFGSR_	Q5BKZ1
GTPQQIDYAR_	Q96AE4-2
GTQCVEQIQELVLR_1xCarbamidomethyl [C4]	Q9P287-2
GTVPLPTISGHR_	P78559-2
GVAGNPMVK_	Q96M27
GVAPLWMR_	Q00325-2
GVAPLWMR_1xOxidation [M7]	Q00325-2
GVAYTLLTPK_	Q86XP3
GVCSCVEAGK_2xCarbamidomethyl [C3; C5]	P26358-2
GVIQAIQK_	Q9NQC3
GVMAVTAVTATAASDR_	Q7Z4V5
GVSPEPIHLK_	O00429
GVTIPYRPKPSSSPVIFAGGQDR_	Q15366-2
GVTVGEGVR_	Q96IJ6
GWAPTFLGYSMQGLCK_1xCarbamidomethyl [C15]	Q00325-2
GWSMSEQSEESVGGR_	Q9UHB6-5
GWWGVNAEPPFPGPGHGGPTR_	P79522-2
GYPHLCSICDLPVHSNK_2xCarbamidomethyl [C6; C9]	P43243
GYSYDLEVEQAYDLAR_	P28074
GYWAGLDASAQTTSHELTIPNDLIGCIIGR_1xCarbamidomethyl [C26]	Q15366-3
HAEQERDELADEITNSASGK_	P35580-3
HATALEELSEQLEQAKR_	P35580-3
HATLSVCYK_1xCarbamidomethyl [C7]	Q13330
HDSPEDVK_	P31948-2
HDSPEDVKR_	P31948
HDYDDSSEEQSAEIR_	P98175-3
HEQASNVLSDISEFR_	Q8NI27
HFIAEYDTSTQDFGEPF_	Q8NEY8-2
HGAPSPSHPISAPQAAAAAALR_	P35658
HGHLCPIDTGLIEK_1xCarbamidomethyl [C5]	P26358-2
HGTVASRPPVQIEELIEKPGGIIVR_	Q8IUI8-2
HGVIVAADSR_	P28074
HHGPQTLYLPVTLSSIPVFQR_	Q14697-2
HHLGPTLKPTLATR_	Q9UIS9-9
HHSSSSQSGSSIQR_	Q5T200-2
HIEEVR_	P16949
HINELSMK_	Q8TC07
HIPLAPGSDWR_	P26358-2
HLAESESLLTSPPK_	Q14669-2
HLALAVLK_	Q96BY6-3
HLAQVGDSMDR_	P55957
HLAQVGDSMDR_1xOxidation [M9]	P55957-2
HLDFLR_	P78559-2
HLDQEQQLK_	Q14669-2
HLEQQAEK_	Q6Y7W6-3
HLFTGPVLSK_	P16930
HLLVPER_	P35658-5
HLSPYATLTVGDSSHK_	Q9BSJ8
HMTLDSFDAMFR_	Q96F07-2
HNHWAGLYGR_	P26358-2
HNLELTMAEMR_	Q9ULU4-12
HPDGGLYNK_	Q9UJU2
HPELNISEEGITK_	P17480
HPVSALMEICNK_1xCarbamidomethyl [C10]	P18583-5
HPYLPINSAAIK_	Q13330-3
HQQLSGLHK_	P98175-5
HQTVQLPR_	Q9UKA9-4
HSFGPLDYESLQQELALK_	O94925-3
HSMNPFCEIAVEEAVR_1xCarbamidomethyl [C7]	P38117
HSTSGTDEGEDGDEPDDGSNDVVDLLPR_	Q14008-3
HSVESMITTLDPGMAPYIK_	Q96M27
HTPGGPWIR_	Q96IJ6-2
HTVPCMPPAK_1xCarbamidomethyl [C5]	Q9ULW0
HVEDGNVTVQHAALSALR_	P52306
HVTAQQPSR_	O14979
HYGFNEILK_	Q8TC07
HYTEAIK_	P31948
HYTEAIKR_	P31948
IAEQEHTQEDLQQLR_	Q9UPN3
IAFLQGER_	Q13033-2
IAIDNLEK_	Q12981
IAMENDDGR_	Q8WWM7-3
IAMENDDGR_1xOxidation [M3]	Q8WWM7
IAMENDDGRTEEEKHSAVQR_	Q8WWM7-3
IANPVEGSTDR_	Q15366-2
IAQITGPPDR_	Q96AE4-2
IAQLEEELEEEQSNMELLNDR_	P35580-3
IAQLEEELEEEQSNMELLNDR_1xOxidation [M15]	P35580-3
IATGHGQQGVTQVVLK_	P51610-4
ICRDPQTPVLQTK_1xCarbamidomethyl [C2]	Q9ULW0
ICYIFHETFGR_1xCarbamidomethyl [C2]	O00429
IDDIADGAVKPPPNK_	Q7Z4V5
IDELEPR_	Q14697-2
IDEVVSR_	Q6P6C2-1
IDKLMIEMDGTENK_	P06733
IDKLMIEMDGTENK_1xOxidation [M]	P06733
IDKLMIEMDGTENKSK_	P06733
IDKVNEIVETNRPDSK_	Q15008-4
IDLGERPVVQR_	Q8TC07
IDLNYLR_	Q86X76
IDPLALVQAIER_	Q14669-2
IDSVLLTHIGADNLPGINGLLQR_	P78559
IDTHPSPSHSSTVK_	Q8NI27
IDVEDILCK_1xCarbamidomethyl [C8]	Q8TC07
IDVLLDTFR_	Q8N9N2
IDYEEGK_	A8MW92-2
IEADSESQEDIIR_	P55957-2
IEELDQENEAALENGIK_	P43243
IELPTQLHEK_	Q96BY6-3
IEQSQHLFQAHK_	P53367-2
IERPGEGSPMVDNPMR_2xOxidation [M10; M15]	Q96T88-2
IETIEVMEDR_	P51991
IETIEVMEDR_1xOxidation [M7]	P51991
IFAEISHPEEEGDLADIK_	Q9UJU2
IFDSPEELPK_	P35658
IFQKGESPVDYDGGR_	Q15084-5
IFVGGIKEDTEEYNLR_	P51991
IGDKEGALTAFRK_	Q15008-4
IGDWQHAQNIMDQMPPYYAASHK_	Q8NI27
IGEHMEEHGIK_	Q16881-5
IGEHMEEHGIK_1xOxidation [M5]	Q16881
IGGDAGTSLNSNDYGYGGQK_	Q96AE4-2
IGGNEGIDVPIPR_	Q96AE4-2
IGLFYMDNDLITR_	Q15008-4
IGLFYMDNDLITR_1xOxidation [M6]	Q15008
IGNEGLAADLTDDPDTEEALK_	Q13033
IGNSYFKEEK_	P31948
IGPYQPNVPVGIDYVIPK_	P43243
IGQLEEQLEQEAKER_	P35580-3
IGQSLSSLTSPAEQGVLSEK_	Q9UPN3-5
IGVAIGDQILDLSIIK_	P16930
IGVSSDSGSINPMSEGFK_	P49790
IHFIEAQDLQGK_	A0FGR8-2
IHGVGFKK_	P62899
IHLLAAR_	Q9BSJ8
IHVLEAQDLIAK_	Q9BSJ8
IIAFVGSPVEDNEK_	P55036
IICNTKDNER_1xCarbamidomethyl [C3]	Q16881-5
IIDQSSNVEIASFPIYK_	Q5R372-3
IIEAAHQVGEDEISLSTLGR_	Q14669-2
IILLKPIIK_	Q14008
IILQTIK_	O75909
IIPGFMCQGGDFTR_1xCarbamidomethyl [C7]	P62937
IIPGFMCQGGDFTR_1xCarbamidomethyl [C7]; 1xOxidation [M6]	P62937
IIPQGADSTMLATK_	P35658
IIPTLEEGLQLPSPTATSQLPLESDAVECLNYQHYK_1xCarbamidomethyl [C29]	P61978-2
IIPTLEEYQHYK_	P61978-3
IIQQVLQGLDYLHTK_	Q96SB4
IISVNEDVTLR_	Q96BW9-3
IITLAGPTNAIFK_	Q15366-2
IIYEQEGVYIHSSCGK_1xCarbamidomethyl [C14]	Q8TC07
IKEEEAAKD_	P26358-2
ILDHLTMIDNK_	Q14008
ILDSFAAAPVPTTTLVLK_	P18583-9
ILEDVVGVPEKK_	Q9ULW0
ILEGLEK_	P78559-2
ILEMDKEENR_	Q6P6C2-1
ILKEQER_	P31948
ILNVDNMK_	Q8TC07
ILPWYPK_	Q8NI27
ILQISPEGPLQGR_	Q96BY6-3
ILSVLGECLDHFGPGCVGVQK_2xCarbamidomethyl [C8; C16]	Q9NVV4
ILVAVVK_	O00232
ILVPSYR_	Q8WWI1
ILYSWGELLGK_	Q5R372-3
IMLNTPEDVQALVSGK_	O00231-2
IMSCGMDHSLK_1xCarbamidomethyl [C4]	O75530
IMSIPNLR_	Q9UJW0
INEDWLCNK_1xCarbamidomethyl [C7]	P98175-5
INIILSETDR_	Q9GZT8
INIILSETDRDPLQVV_	Q9GZT8
INQQEEPGFEVITR_	Q8TC07
IPAEVLILNSIVLPHK_	Q96IJ6
IPCVDAGLISPLVQLLNSK_1xCarbamidomethyl [C3]	P52306
IPSDLLDK_	Q6Y7W6
IPSISDLK_	Q96RP9
IPTRPFEEGK_	Q9H8Y8
IQAGEIGEMK_	P16989
IQDLEQLAK_	Q12981
IQFKPDDGTTPER_	Q96AE4-2
IQIAPDSGGLPER_	Q96AE4-2
IQSLASSR_	Q9UPN3
ISAAMYK_	Q96F07-2
ISADFHVDLNHAAVR_	Q96BY6-3
ISANENSLAVR_	Q9UHB6-5
ISGTTALQEALK_	P30622-2
ISLPGQMAGTPITPLK_	Q9H8Y8
ISLSDMPR_	Q9ULU4-12
ISPMLSPFISSVVR_	Q9NXR7
ISQLAAVNR_	P29590
ISTEDLVK_	Q96BY6-3
ISVAAASK_	P28074
ISVVSATK_	Q9UKV3
ISWVGEAVK_	P26358-2
ITAEDCTMEVTPGAEIQDGR_1xCarbamidomethyl [C6]	Q6UN15
ITAEDCTMEVTPGAEIQDGR_1xCarbamidomethyl [C6]; 1xOxidation [M8]	Q6UN15
ITAMDTEDQGVK_	Q9H6Z4
ITFCTGIR_1xCarbamidomethyl [C4]	P55036
ITGLLASK_	A8MW92-2
ITPENLPQILLQLK_	P43243
ITVPLVSEVQIAQLR_	A0FGR8-2
ITVQQGR_	Q6UN15-3
IVEVEQDNK_	Q92619
IVEVLLMKDR_	P38159
IVEVLLMKDRETNK_	P38159
IVGCSVHK_1xCarbamidomethyl [C4]	P07910-2
IVGCSVHKGFAFVQYVNER_1xCarbamidomethyl [C4]	P07910-2
IVGLDQVTGMTETAFGSAYK_1xOxidation [M10]	P35580-4
IYVEIER_	O00232
KAAALEAMKDYTK_	P31948
KAAALEFLNR_	P31948
KAATALKDVVK_	Q15084-5
KDDINLLPSK_	Q9ULW0
KDDSTCNSTVETR_1xCarbamidomethyl [C6]	Q9HB58-6
KDFDTALK_	P31948
KEDLPTSSETFGLHVENVPK_	A8MW92-2
KEEECQAGAAEMR_1xCarbamidomethyl [C5]	Q96JB5
KEEECQAGAAEMR_1xCarbamidomethyl [C5]; 1xOxidation [M12]	Q96JB5-4
KEELSEEGYLAK_	P26358-2
KEIHTVPDMGK_	Q15257
KEIHTVPDMGK_1xOxidation [M9]	Q15257-2
KEPVDEDLYPEHYR_	P26358-2
KETKPEPMEEDLPENK_1xOxidation [M8]	P31948-2
KETKPEPMEEDLPENKK_	P31948
KEWLVGMLGAESTK_1xOxidation [M7]	Q02880-2
KEYEEIMR_	P17480
KFMNPFNMPNLYQK_	P31948
KIEVIKPGDLGVDLTSK_	P38117
KIGLETVGVK_	Q16881-5
KIIQQVLQGLDYLHTK_	Q96SB4
KISVVSATK_	Q9UKV3
KISVVSTK_	Q9UKV3-5
KLDAQVQELHAK_	P35580-3
KLDGETTDLQDQIAELQAQIDELK_	P35580-4
KLNVTEQEK_	P06733
KLNVTEQEKIDK_	P06733
KLPGEVTETEVIALGLPFGK_	Q9UKA9-3
KLPVNGFR_	Q02880
KNEADISSSANTQKPALLSSTLSSGK_	A8MW92
KPAAGLSAAPVPTAPAAGAPLMDFGNDFVPPAPR_	Q9NQC3
KPAFNLSAFGTLSPSLGNSSILK_	P49790
KPGADLSDYFNYGFNEDTWK_	Q6UN15
KPGINVASDWSIHLR_	Q14697-2
KPPLAAALGEAEPPGPVDATDLPK_	O75909
KPPLLDRPGEGSYNR_	Q8NEY8-2
KPQDQLVIER_	Q8WWI1-3
KPQEESER_	P26358-2
KPQSSSTEPAR_	Q7Z4V5
KPYCNAHYPK_1xCarbamidomethyl [C4]	Q14847
KQEEETAQLK_	Q5R372-5
KQELQPGTAYK_	P51610-4
KQMVIDVLHPGK_	P62847
KQMVIDVLHPGK_1xOxidation [M3]	P62847
KQQTLEAEEAK_	Q16643-3
KRNEDEDSPNK_	P62899
KSDVEAIFSK_	P07910-2
KSDVEAIFSKYGK_	P07910-2
KSESEVEEAAAIIAQRPDNPR_	Q16643-3
KSHEAEVLK_	P16949-2
KTDEYLEK_	Q9NXE4-2
KTPTSSGKPSAK_	Q02880
KTSFDQDSDVDIFPSDFPTEPPSLPR_	Q02880
KVVAEVYDQER_	Q9UHX1
KYAVLYQPLFDKR_	P55209
LAASGEGGLQELSGHFENQK_	Q16643-3
LACMEEFQK_1xCarbamidomethyl [C3]	Q14008
LACMEEFQK_1xCarbamidomethyl [C3]; 1xOxidation [M4]	Q14008-3
LADHGSSSGGGWEVK_	P98175-5
LAEALPK_	P20290
LAEELGR_	P30622-2
LAGEELAGEEAPQEK_	Q7Z4V5
LAGGAAIK_	O14979
LAGSELFAK_	Q5T200
LAGVTLGQR_	P26358-2
LAHGGQVNLDMEDHR_	Q9UNZ2-5
LAHGGQVNLDMEDHR_1xOxidation [M11]	Q9UNZ2-5
LALAGIGQPVK_	Q9ULW0-2
LALAGIGQPVKK_	Q9ULW0
LALGVGR_	Q9GZT8
LAQDPYR_	P18583-9
LAQLITQAK_	Q9NXE4-2
LAQTLSTQLFQMVHTQR_	P53367-2
LASFSPSPPSPYPTTVGPVESSGLR_	Q96SK2-2
LCESLEELQNLNGK_1xCarbamidomethyl [C2]	O94880
LCMLAK_1xCarbamidomethyl [C2]	P26358-2
LCSLFYTNEEVAK_1xCarbamidomethyl [C2]	P43243
LDDIFEPVLIPEPK_	Q14008-3
LDESIYDVAFHSSK_	Q13033-2
LDETGVALK_	Q02880-2
LDGLVETPTGYIESLPR_	P55209
LDKDIVALMTR_	Q02880
LDLLEDR_	Q14697-2
LDLLLEK_	Q96JB5
LDPETLESLGLIK_	Q8NI27
LDPNFLLK_	Q9BXW9-1
LDQQTLPLGGR_	P98175-5
LDYQHEIENLQNQQDSER_	P30622-2
LEALDYLQK_	A8MW92-2
LEALLEK_	P78559-2
LEDLPVIIK_	Q9BXW9-1
LEEDISSSMTNSTAASRPPVTLR_	Q15366-2
LEEDISSSMTNSTAASRPPVTLR_1xOxidation [M9]	Q15366-2
LEEPSLR_	O00429
LEESSTIGQDQTLMER_	Q96SB4
LEESSTIGQDQTLMER_1xOxidation [M14]	Q96SB4-3
LEFSDETFGSNIPK_	Q96RP9
LELLAAYEEVIR_	Q16643-3
LELLIDK_	P51809
LEMIFAK_	O75122-3
LEQLILSDTGISSLHFPDAGIGCK_1xCarbamidomethyl [C23]	Q15813-2
LETQVWEAHNPLTDK_	Q13330-3
LEVLHYR_	Q9NXE4-4
LEVNMQAMK_	P35580-3
LFENFYFGSLK_	Q8N9N2-2
LFGNILDK_	P26358-2
LFIGGLNTETNEKALEAVFGK_	P38159
LFIGGLSFETTDDSLR_	P51991
LFQGVNK_	Q6Y7W6
LFQPNLNMDR_	P54687-5
LFQTLR_	Q9BXW9-1
LFSQDECAK_1xCarbamidomethyl [C7]	Q6P6C2-1
LFTTMELMR_	O00232
LFTTMELMR_1xOxidation [M]	O00232
LFVFDK_	Q9H6Z4
LFVGFLNR_	Q9NXE4-2
LGAAPEEESAYVAGEK_	Q9UNZ2-5
LGDLWTLDIDTLTWNKPSLSGVAPLPR_	P51610-4
LGEESIR_	Q08554-2
LGIIGVVNR_	O00429
LGIQAEPLYR_	P78559-2
LGLLEALLK_	Q8NI27
LGLTMQYPEGYLEALANR_	Q96T88
LGLTMQYPEGYLEALANR_1xOxidation [M5]	Q96T88-2
LGSTAPQVLSTSSPAQQAENEAK_	Q9UNZ2-5
LGVNNISGIEEVNMFTNQGTVIHFNNPK_	P20290
LGVNNISGIEEVNMFTNQGTVIHFNNPK_1xOxidation [M14]	P20290
LHDAIVEVVTCLLR_1xCarbamidomethyl [C11]	O00429
LHIVALIAQK_	Q14008
LHPEMSNLDLTK_	P17480
LHPEMSNLDLTK_1xOxidation [M5]	P17480
LHPQLHR_	P29590-8
LHQLAMQQSHFPMTHGNTGFSGIESSSPEVK_	Q15366-2
LHQLAMQQSHFPMTHGNTGFSGIESSSPEVK_1xOxidation [M]	Q15366-2
LHTVQPK_	P55036
LIALAICK_1xCarbamidomethyl [C7]	Q8NI27
LIAVEIYR_	Q14008
LIEHGVNTAEDLVR_	Q8IUI8-2
LIGNLSEK_	Q14008
LIHITIEPLYR_	Q8NI27
LILEQMQKDPQALSEHLKNPVIAQK_	P31948
LILNTK_	Q9H6Z4
LILSDELKPAHR_	Q9UBF8
LIQLSVANNR_	Q8IW35
LIVSQLK_	Q9BXW9-1
LKEVLEYNAIGGK_	P14324-2
LKGDDLQAIK_	P07910-2
LKGDDLQAIKK_	P07910-2
LKPPTLIHGQAPSAGLPSQKPK_	Q9H6Z4
LKQQSELQSQVR_	Q14847
LLAGPDTEVLSFVLK_	Q8WWW0
LLANMVYQYK_	P28074
LLANQQVFHISCFR_1xCarbamidomethyl [C12]	Q9UHB6-5
LLDEALK_	Q9NV70-2
LLDEWFTLDEVPK_	A0FGR8-2
LLDLDALR_	P30622-2
LLDLSSNQLIDENQLYLIAHLPR_	Q15813
LLDQIVEK_	Q96AE4-2
LLDTNPEINQSDSQDSR_	Q14669-2
LLEIKPEVELPLK_	Q92784-3
LLEIKPEVELPLKK_	Q92784
LLIESLEK_	Q8TC07
LLIIASIGQLK_	Q15813-2
LLPAITILGCR_1xCarbamidomethyl [C10]	Q96IJ6
LLPDTINSINLDR_	Q14008
LLPSVWSESEDGAGSPPPYR_	Q9UIS9-12
LLQPDFQPVCASQLYPR_1xCarbamidomethyl [C10]	Q9UJW0
LLSISGK_	P06748
LLSQVVRPQESR_	Q5T200
LLSSGFDIDTPDDFGR_	O15084
LLVSHGAEVTCK_1xCarbamidomethyl [C11]	O15084
LMDLLDR_	P52306
LMEWLK_	Q9NV70-2
LMHQAALLGQALQDSR_	Q16881-5
LMIEMDGTENK_	P06733
LMIEMDGTENK_1xOxidation [M]	P06733
LMIEMDGTENK_2xOxidation [M2; M5]	P06733
LMIEMDGTENKSK_	P06733
LNDMASTDDGTLQSR_	Q9H6Z4
LNEVSSDANR_	Q9H6Z4
LNFDMTASPK_	Q9ULU4-12
LNHLVDSLQQLR_	P35658
LNIPAILR_	O94880
LNKDNDTLKDLLK_	Q9H8Y8
LNLLHEFLQTEIK_	P26358-2
LNNPGSTVFTEDCNILLK_1xCarbamidomethyl [C13]	P26358-2
LNSIHISQR_	Q8N9N2-2
LNSLMSLVNK_	O00232
LNVTEQEK_	P06733
LNVTEQEKIDK_	P06733
LNVTEQEKIDKLMIEMDGTENK_	P06733
LPEASQSPLVLK_	Q13330-3
LPEDDEPPARPPPPPPASVSPQAEPVWTPPAPAPAAPPSTPAAPK_	Q9NQC3-2
LPEQPVDVPSEIADSSMTRPQELPELPK_1xOxidation [M17]	P18583-9
LPGAIDVIGQTITISR_	Q6UN15
LPGEVTETEVIALGLPFGK_	Q9UKA9-3
LPLFPEPLHVFAPR_	P26358-2
LPNYDAR_	Q02880
LPQQSHSAFGATSSSSGFGK_	Q86XP3
LPSHSFEIDHEDADKDEDTTSHSSSK_	Q96BY6-3
LPVNGFR_	Q02880
LPVTCGEAK_1xCarbamidomethyl [C5]	Q9HB58-7
LQAQQDAVNIVCHSK_1xCarbamidomethyl [C12]	P55036
LQATLDMQSGIIHAAEEK_1xOxidation [M7]	O00231
LQDEEASMGASYSK_	Q9BXW9-1
LQDLSSCITQGK_1xCarbamidomethyl [C7]	P29590
LQEAESNLR_	Q92619-2
LQESASGTGPR_	Q9UJU2
LQEVIETLLSLEK_	O00232
LQGSVSVK_	Q96BY6-3
LQLFGQDFSHAAR_	Q92619-2
LQNELDNVSTLLEEAEKK_	P35580-3
LQPSSSPENSLDPFPPR_	Q8WWM7
LQQHQSMPGTMAEAEDLDGGTLSR_	Q9NV70-2
LQQQQQQQQLAQMK_	Q6Y7W6-3
LQTTLTCNSMVLFDHMGCLK_2xCarbamidomethyl [C7; C18]	Q02880
LQVVDKVTQR_	Q9HB58-7
LREDENAEPVGTTYQK_	Q16643-3
LRPGFMEDR_	Q5BKZ1
LSDGTMAR_	P26358-2
LSDLYYDIHR_	Q96BY6-3
LSENAFDLEAMSMLNR_	P18583-5
LSEVQASLHG_	Q9NXW2
LSFQHDPETSVLVLR_	Q14697-2
LSGYEEALK_	Q14008
LSHVPPPLFPSAPATLASR_	O14979
LSIADRPLYLR_	Q8WWW0-2
LSIFDANESGFESYEALPQHK_	P26358-2
LSLGTYASLHGR_	Q9UHB6-5
LSQMILDK_	O00231-2
LSQMILDK_1xOxidation [M4]	O00231-2
LSSGPFR_	P26358-2
LSSPVLHR_	Q16643-3
LSSYEEMLQSVK_	Q9NV70-2
LSTQSNSNNIEPAR_	Q14669-2
LSYYGLR_	Q02880
LTAFVNTLNGK_	P55036
LTAQVEELSK_	Q14980-2
LTAQVEQLEVFQR_	Q14980
LTDIQYGR_	P54687-5
LTDWQK_	P98175-5
LTEQSNTPLLLPLAAR_	Q9NYL2-2
LTFEYR_	Q15257
LTGLSEISQR_	Q96BY6-3
LTHVDSPLEAPAGPLGQVK_	Q9BSJ8
LTLENR_	Q02880
LTMVVLSSEK_	Q8NI27
LTMVVLSSEK_1xOxidation [M3]	Q8NI27
LTQHVPLLK_	Q9BXW9-1
LTSEPEGDWFCPECEK_2xCarbamidomethyl [C11; C14]	Q9ULU4-12
LVDNFQHEENLLQQVASK_	Q14669-2
LVEALAAATEK_	Q9BRJ7
LVMAGETTNSR_	P26358-2
LVNLNVK_	Q9UKA9-4
LVPVSFEDPEFK_	O95260-2
LVQILHR_	P52306
LVVPASQCGSLIGK_1xCarbamidomethyl [C8]	Q15366-2
LVVVGAGGVGK_	P01116
LWFTYR_	Q9Y4P1
LWNLDSK_	Q13033-2
LWSFTK_	Q8IUI8-2
LYDPGQQYASHVR_	Q92619-2
LYHELVGLAK_	Q92619-2
LYTDFDEIR_	O00429
MADPESNQEAVNSSAAR_	Q14669-2
MADPESNQEAVNSSAAR_1xOxidation [M1]	Q14669-2
MAEVEDQAAR_1xOxidation [M1]	Q86XP3-2
MAGGAADCSFWER_1xCarbamidomethyl [C8]; 1xOxidation [M1]	P28074-3
MAPTPIPTR_	Q16643-3
MASATSSSQR_	Q96T88-2
MCQGGDFTR_1xCarbamidomethyl [C2]	P62937-2
MCQGGDFTR_1xCarbamidomethyl [C2]; 1xOxidation [M1]	P62937-2
MDAATLTYDTLR_1xAcetyl [N-Term]	Q9Y4P1
MDCEVNNGSSLR_1xAcetyl [N-Term]; 1xCarbamidomethyl [C3]	P55957
MDFEDDYTHSACR_1xAcetyl [N-Term]; 1xCarbamidomethyl [C12]	Q5BKZ1
MDGIVTEVAVGVK_1xAcetyl [N-Term]	Q9UKA9-4
MDNLSDTLK_1xAcetyl [N-Term]	P52306
MDSESLFK_	Q96IJ6
MDYEDDR_	P43243
MDYEDDR_1xOxidation [M1]	P43243
MDYEDDRLR_	P43243
MEALILEPSLYTVK_1xAcetyl [N-Term]	P61923
MEALIPVINK_1xAcetyl [N-Term]	O00429
MEANKENR_	P16949
MEDHQHVPIDIQTSK_1xAcetyl [N-Term]	Q96JB5
MEDMNEYSNIEEFAEGSK_1xAcetyl [N-Term]	O14979-2
MEDMNEYSNIEEFAEGSK_1xAcetyl [N-Term]; 1xOxidation [M4]	O14979-2
MEDMNEYSNIEEFAEGSKINASK_1xAcetyl [N-Term]	O14979-2
MEDSMDMDMSPLRPQNYLFGCELK_1xAcetyl [N-Term]; 1xCarbamidomethyl [C21]	P06748
MEDSMDMDMSPLRPQNYLFGCELK_1xAcetyl [N-Term]; 1xCarbamidomethyl [C21]; 2xOxidation [M5; M7]	P06748
MEDSMDMDMSPLRPQNYLFGCELK_1xAcetyl [N-Term]; 1xCarbamidomethyl [C21]; 3xOxidation [M5; M7; M9]	P06748
MEEEAAR_1xOxidation [M1]	Q6Y7W6-3
MEEEILLLEDQNSK_	P35580-3
MEEPQAGDAAR_1xAcetyl [N-Term]	O15446
MEGHDPK_1xAcetyl [N-Term]	P51991-2
MEGHDPKEPEQLRK_1xAcetyl [N-Term]	P51991-2
MELEPELLLQEAR_1xAcetyl [N-Term]	Q8IUI8-2
MELGSCLEGGR_1xAcetyl [N-Term]; 1xCarbamidomethyl [C6]	O95551
MENCLGESR_1xAcetyl [N-Term]; 1xCarbamidomethyl [C4]	Q9UHB6-5
MEQVNELK_1xAcetyl [N-Term]	P31948
MEQVNELKEKGNK_1xAcetyl [N-Term]	P31948
MESVFNQAIR_	Q96F07-2
MESVFNQAIR_1xOxidation [M1]	Q96F07
MEVDYSATVDQR_	O00232
MEVKPPPGRPQPDSGR_1xAcetyl [N-Term]	P51991
MEVKPPPGRPQPDSGRR_1xAcetyl [N-Term]	P51991
MFDMGFEYQVR_	Q86XP3
MFFEDEKPALLSQIDAEFEK_	Q14008
MFFEDEKPALLSQIDAEFEK_1xOxidation [M1]	Q14008-3
MGDFGSIHRPGIVVDYQNK_	Q5BKZ1-3
MGDFGSIHRPGIVVDYQNK_1xOxidation [M1]	Q5BKZ1-3
MGLEVIPVTSTTNK_	Q6UN15
MGLEVIPVTSTTNK_1xOxidation [M1]	Q6UN15
MGLGQAAWK_	P16930-2
MGPSGGEGMEPER_1xOxidation [M]	Q14847-2
MGPSGGEGMEPER_1xOxidation [M1]	Q14847
MGPSGGEGMEPER_2xOxidation [M1; M9]	Q14847-2
MGPSGGEGMEPERR_	Q14847
MGRGPGPLQER_	P43243
MIAGQVLDINLAAEPK_	P07910-2
MIAGQVLDINLAAEPK_1xOxidation [M1]	P07910-2
MIAGQVLDINLAAEPKVNR_	P07910-2
MIEAVQNHIGSLNWGYR_	Q16881-5
MIEMDGTENK_	P06733-2
MIEMDGTENK_1xOxidation [M]	P06733-2
MIEMDGTENK_2xOxidation [M1; M4]	P06733-2
MIPENEFHHK_	Q8NI27-2
MKETIMNQEK_	P20290-2
MLALGNQVGK_	O75530
MLDASGEK_	Q13422
MLDGLDPHPMLPNYK_	Q02880
MLELVAQK_	Q04323-2
MLHFLTAVVGSTCDVK_1xCarbamidomethyl [C13]	Q8WWM7-3
MLIDAQAEAAEQLGK_	P52306
MLIDAQAEAAEQLGK_1xOxidation [M1]	P52306-5
MLIDAQEAAEQLGK_1xOxidation [M1]	P52306-4
MLIYSSK_	Q9H8Y8
MLKPQPLQQPSQPQQPPPTQQAVAR_1xAcetyl [N-Term]	Q8WWM7-3
MLPQAATEDDIR_	P98175-5
MLPQAATEDDIR_1xOxidation [M1]	P98175-5
MLQAMGWK_	P98175-5
MLSAGVTEAVLK_	P52306
MLSAGVTEAVLK_1xOxidation [M1]	P52306
MMDYLQGSGETPQTDVR_	Q14697-2
MMDYLQGSGETPQTDVR_1xOxidation [M]	Q14697-2
MMDYLQGSGETPQTDVR_2xOxidation [M1; M2]	Q14697-2
MMQNPQILAALQER_	P55209-3
MNDTVTIR_	P62847-4
MNDTVTIR_1xAcetyl [N-Term]	P62847
MNDTVTIR_1xOxidation [M1]	P62847-4
MNEIMDK_	Q9P287
MNGDQNSDVYAQEK_1xAcetyl [N-Term]	P14324-2
MNGPEDLPK_1xAcetyl [N-Term]	Q16881-5
MPFAWAVR_	Q96BY6-3
MPTFESEETK_	Q13033-2
MPTKEDEEEDEPVVIK_	Q9ULW0
MQAHIQDLEEQLDEEEGAR_	P35580-3
MQASIEKAH_	P06748-3
MQASIEKGGSLPK_	P06748
MQASIEKGGSLPKVEAK_	P06748
MQEIEEMEK_1xOxidation [M7]	Q96SB4-3
MQGEAHPSASLIDR_1xAcetyl [N-Term]	Q96SK2-2
MQGQSPPAPTR_	Q14008
MQGQSPPAPTR_1xOxidation [M1]	Q14008-3
MQQEVVEMR_	Q9ULW0
MQQEVVEMR_1xOxidation [M]	Q9ULW0-2
MQQEVVEMR_1xOxidation [M1]	Q9ULW0
MQVDPQK_	Q00325-2
MQVDPQK_1xOxidation [M1]	Q00325
MSDEEILEK_	Q13153
MSDEEILEK_1xOxidation [M1]	Q13153-2
MSEESYFESK_	Q9NYL2-2
MSPEVALNR_1xAcetyl [N-Term]	Q9NXR7
MSSPLADAK_	P49790
MSVQPTVSLGGFEITPPVVLR_	P06748
MSVQPTVSLGGFEITPPVVLR_1xOxidation [M1]	P06748
MTDQEAIQDLWQWR_	P06748
MTDQEAIQDLWQWR_1xOxidation [M1]	P06748
MTDQEAIQDLWQWRK_	P06748
MTDQEAIQDLWQWRK_1xOxidation [M1]	P06748
MTISQQEFGR_	P55036
MVFPQPESTLSNK_1xOxidation [M1]	A8MW92-2
MVNPTVFFDIAVDGEPLGR_1xOxidation [M1]	P62937
MWNDLSEK_	P17480
MWNDLSEK_1xOxidation [M1]	P17480
MYKEEGLK_	Q00325-2
MYMESLEACR_1xCarbamidomethyl [C9]	Q9HB58-7
MYSYPAR_	P07910-2
MYSYPAR_1xOxidation [M1]	P07910-2
MYSYPARVPPPPPIAR_	P07910-2
NAALNTIVTVYNVHGDQVFK_	Q14008
NAGEIGEMK_	P16989-2
NAGEIGEMK_1xOxidation [M8]	P16989-2
NALDPMSVLLAR_	P42785
NAMGSLASQATK_	P55036
NAMGSLASQATK_1xOxidation [M3]	P55036
NAQKSNQNGKDSKPSSTPR_	P06748
NAVASVQNGPGGGPSSSSIGSASK_	Q8NI27
NDANCIHMVDNGIVEK_1xCarbamidomethyl [C5]	P52306
NDECVLEDNSQR_1xCarbamidomethyl [C4]	Q9UPN3
NDKSEEEQSSSSVK_	P07910-2
NDKSEEEQSSSSVKK_	P07910-2
NDMEQMK_	P98175-5
NDSDLFGLGLEEAGPK_	Q3YEC7-2
NDSESSGVLYSR_	Q8IUI8-2
NEDEDSPNK_	P62899-2
NEDGTWLTPNEFEVEGK_	Q9HB58-7
NEENTEPGAESSENADDPNK_	P43243
NETYNSHPLLVK_	Q8NI27
NFLEGDWK_	Q9NR46
NFYNEHEEITNLTPQQLIDLR_	Q86XP3
NGDFLPTR_	P55036
NGPPPCPR_1xCarbamidomethyl [C6]	P51610-4
NGTGGLFQGK_	Q9ULW0
NGVIFQEGGEK_	Q8NI27
NHEAQIQDMR_	P35580-3
NIDLVAQR_	P51809
NIGFSHLQQR_	Q9BXW9-1
NILAEQLQAETELFAEAEEMR_1xOxidation [M20]	P35580-4
NILIVLTK_	Q8NI27
NISQELNMEQK_	O94880-2
NKESKDPADETEAD_	P16949
NKGNECFQK_1xCarbamidomethyl [C6]	P31948
NKQEVMISDLEER_	P35580-3
NKQGLETDNKELACEVK_1xCarbamidomethyl [C14]	P35580-3
NLAIPVINK_	P52306
NLEPEWAAAASEVKEQTK_	Q15084-5
NLGFETSAFK_	Q9UBF8
NLGLYVK_	Q14697-2
NLINATNAALQTPLHVAAR_	O15084
NLLESLK_	Q9NVV4-2
NLNPHSTMDSILGALAPYAVLSSSNVR_	P98175-5
NLPIYSENIIEMYR_	P35580-3
NLPSNPLEFNPDVLK_	A0FGR8-6
NLPVNFESFPLK_	O95793-3
NLPVNFEVAR_	O95793
NLQTVNVDEN_	P62899
NMDPLNDNVATLLHQSSDR_	P35580-3
NNPATPSTAMGSSVPYSTAK_	P35658
NNQFQALLQYGDPVNAQQAK_	Q9UKA9-3
NPEDLSAETMAK_	Q9Y570
NPEPELLVR_	Q14697-2
NPWSDDESK_	Q02880-2
NQEEYKEVNFTSELR_	Q9ULW0
NQGGSSWEAPYSR_	Q5BKZ1
NQILQNEK_	P35580-3
NQLCDLETK_1xCarbamidomethyl [C4]	P26358-2
NQLLSCSADGTVR_1xCarbamidomethyl [C6]	Q13033-2
NSAAEIPVTSNGEVDDSR_	P53367
NSADDEELTNDSLTLSQSK_	O94880
NSAEEEVLSSEK_	O94880
NSFQPISSLR_	P98175-5
NSLDSFGGR_	Q5BKZ1
NSNMGFWDDAVK_	Q6Y7W6
NSNMGFWDDAVK_1xOxidation [M4]	Q6Y7W6-3
NSTSSQSQTSTASR_	Q6UN15
NTAGAQPQDDSIGGR_	Q14669-2
NTDQASMPENTVAQK_1xOxidation [M7]	P35580-4
NTDVVATLK_	Q7Z4V5
NTDVVATLKK_	Q7Z4V5
NTHCSSLPHYQK_1xCarbamidomethyl [C4]	P43243
NTPYQAPVR_	P49790
NTSLPPLWSPEAER_	P49790
NTTGSTIAEIR_	Q9ULU4-12
NTYQGFNGMDR_	Q5BKZ1
NTYQGFNGMDRDYGPGSYGGMDRDYGHGSYGGQR_	Q5BKZ1
NVASGGGGVGDGVQEPTTGNWR_	O00429
NVCKPVEETQRPPTLQEIK_1xCarbamidomethyl [C3]	Q8WWW0-2
NVDLLSDMVQEHDEPILK_	P55209
NVDLLSDMVQEHDEPILK_1xOxidation [M8]	P55209
NVEDDYIANLR_	Q9NXW2
NVFSSSGTSFSGR_	P49790
NVHELEK_	P35580-3
NVNYEIPSLK_	Q96JB5
NVVIAADGVLK_	Q9NYL2-2
NYMDYLSR_	Q9NV70-2
NYMPLAFSDK_	Q9UJW0
NYVDCVR_1xCarbamidomethyl [C5]	O75530-2
Peptide sequence + modifications	Master Protein Accessions
QAAEEVWAR_	Q96SK2-2
QAESFEDLR_	Q8NI27
QAESVMQDLGSSR_	Q14669-2
QAESVMQDLGSSR_1xOxidation [M6]	Q14669-2
QAFAPFGPIK_	Q9UHX1-2
QAQTSQEPYHDK_	Q9UJU2
QAYTSAPMVDNELLR_	Q5T200
QDADSLQR_	P14324
QDGSESEAVAVALAGR_	Q92619
QDIITLQDPTNLDK_	Q13356-2
QDMGEEAEEEPQK_1xOxidation [M3]	O43491
QEEELQAK_	P35580-4
QEESESPVERPLK_	Q96SB4-3
QEGHNLGLLHGDMDQSER_	Q86XP3
QEIENETER_	O00429
QELEEILHDLESR_	P35580-4
QELQPGTAYK_	P51610-4
QEMQSAGSQR_	P51991
QEMQSAGSQR_1xOxidation [M3]	P51991
QENGASVILR_	P29692-2
QEPPDPEEDKEENKDDSASK_	Q9UIS9-12
QESTVMVLR_	Q9UHX1-2
QETSLTSHDLFDIDPVVAR_	Q14669-2
QEVMISDLEER_	P35580-3
QFADACGQALDVNER_1xCarbamidomethyl [C6]	Q96BY6
QFVPIK_	Q16881-5
QFVPIKVEQIEAGTPGR_	Q16881-5
QGILCYPAPK_1xCarbamidomethyl [C5]	Q9UIS9-9
QGIVTPIEAQTR_	P98175-5
QGQELSAAR_	Q04323-2
QHPPADSSVTMEDMNEYSNIEEFAEGSK_	O14979
QHPPADSSVTMEDMNEYSNIEEFAEGSK_2xOxidation [M11; M14]	O14979
QHSSQDVHVVLK_	Q9UNZ2-5
QHTSMDLPK_	P98175-5
QIDLVDNYFVK_	Q9UPN9-2
QIDSGSNLTTDLIVQR_	Q99447-3
QISYNYSDLDQSNVTEETPEGEEHHPVADTENK_	Q8NC51
QIVDAQAVCTR_1xCarbamidomethyl [C9]	P29590
QKVDSLLENLEK_	P07910-2
QKVDSLLENLEKIEK_	P07910-2
QLAPLLPSLAPSSAR_	O14979
QLESLPATHIR_	Q13330-3
QLLDHMDSWTAK_	Q96SK2-2
QLPDCIVGEDGLILTPLGR_1xCarbamidomethyl [C5]	Q9NXE4-2
QLQEERPELSESELTR_	P17480
QLSSSSGNTDTQADEDER_	P30622
QLTEMLPSILNQLGADSLTSLR_1xOxidation [M5]	P20290
QMASQAPAVNTLTESTLK_	P35658
QMEDGHTLFDYEVR_1xOxidation [M2]	Q96T88-2
QMEHVQR_	Q8NI27
QNEASSHIQDDMHLVIR_	Q9BXW9-1
QNGTVVQYLPTLQEK_	P35658
QNHHQPPTQQQPPLPER_	P79522-2
QNLHEIESAGQTWQQVPPVR_	Q8NEY8
QNLHEIGER_	Q8NEY8-2
QPALTADFVNYYFER_	O94880
QPYPSSLSVDTSMSR_	Q9UJU2
QPYPSSLSVDTSMSR_1xOxidation [M13]	Q9UJU2
QQAAYYAQTSPQGMPQHPPAPQGQ_	Q96AE4
QQDPSPGSNLGGGDDLK_	Q13951-2
QQEPVTSTSLVFGK_	P49790
QQILQEMR_	Q8WWI1-3
QQLLQEQQLR_	O95819-3
QQQLSALK_	P35580-3
QQTLEAEEAK_	Q16643-3
QQTNNQTEVVK_	Q5BKZ1
QSFTMVADTPENLR_1xOxidation [M5]	Q14847-2
QSLVLPHSTK_	Q96T88
QSQLLALK_	Q96JB5-4
QSSGPGASSGTSGDHGELVVR_	P29692-3
QTIAHQQQQLTNLQMAAQR_	Q9UHX1-2
QTTITSHFAK_	P26358-2
QTWMNNMMK_	Q02880
QVGPQSGEVR_	Q9UIS9-12
QVLALQSQLADTK_	P35580-3
QWDYYAR_	Q6UN15
QWSQLSDK_	P17480
QYASLTGTQALPPLFSLGYHQSR_	Q14697-2
QYLFSLYECR_1xCarbamidomethyl [C9]	Q15008-4
QYLQEVGYTDTILDVR_	Q13033-2
RASGQAFELILSPR_	P16949-2
RDSFDDRGPSLNPVLDYDHGSR_	P43243
REDIVDTMVFKPSDVMLVHFR_	Q8WWM7-3
REPWLLPSQHNDIIR_	Q14697-2
RGEEGHDPKEPEQLR_	P51991
RGPGLYYVDSEGNR_	P28074
RIHGVGFK_	P62899
RKPQEESER_	P26358-2
RPDLYGNLGHPLS_	Q86X76
RPHPQHSQQPPPPQQER_	O95819-3
RPLEDGDQPDAK_	Q96AE4-2
RPLILQLVHVSQEDK_	O00429
RPRPPNAPSQDGK_	P16989-2
RPYQDMEYER_	P98175-5
RQQDPSPGSNLGGGDDLK_	Q13951-2
RSAAEMYGSSFDLDYDFQR_	P07910-2
RSECNMCNTPK_2xCarbamidomethyl [C4; C7]; 1xOxidation [M6]	O95218
RTEEGPTLSYGR_	P43243
RYEEQELK_	Q5T200-2
SAAAAAATR_	O14979
SAAEMYGSSFDLDYDFQR_	P07910-2
SAAEMYGSSFDLDYDFQR_1xOxidation [M5]	P07910-2
SAAEMYGSVTEHPSPSPLLSSSFDLDYDFQR_	P07910
SAAEMYGSVTEHPSPSPLLSSSFDLDYDFQR_1xOxidation [M5]	P07910
SAASPVVSSMPER_	P18583-9
SAEDYNSSNALNVK_	Q13153
SAELAAALLSIYMER_	Q9BSJ8
SAMAAVLAMR_	P29590
SAPPQLPSFYK_	Q86XP3
SAPPTRGPPPSYGGSSR_	P38159
SAPPTRGPPPSYGGSSRYDDYSSSR_	P38159
SAPSGPVR_	P38159-2
SASVAPFTCK_1xCarbamidomethyl [C9]	P49790
SATLLQLITK_	O00429
SATREPPYRVPR_	P43243
SAVDQAGGAQIVIDHLR_	P52306
SCENAIVCWKPGK_2xCarbamidomethyl [C2; C8]	O75530
SCMLTGTPESVQSAK_1xCarbamidomethyl [C2]	Q96AE4-2
SCMLTGTPESVQSAK_1xCarbamidomethyl [C2]; 1xOxidation [M3]	Q96AE4-2
SCSSSSAVIVPQPEDPDR_1xCarbamidomethyl [C2]	Q14669-2
SDEGHPFR_	Q9NQC3
SDESIKEEDKDQDEK_	P26358-2
SDESSTEETDK_	Q8NI27
SDGEAKPEPSPSPR_	P26358
SDIPEKPK_	P17480
SDPYALVR_	Q9BSJ8
SDPYGIIR_	A0FGR8-2
SDVEAIFSK_	P07910-2
SDVEAIFSKYGK_	P07910-2
SEAQLQEIR_	P35658
SECNMCNTPK_2xCarbamidomethyl [C3; C6]	O95218-2
SECNMCNTPK_2xCarbamidomethyl [C3; C6]; 1xOxidation [M5]	O95218
SEEEQSSSSVK_	P07910-2
SEEIIDGTSEMNEGK_1xOxidation [M11]	Q9HB58-6
SEEMDMDHIMTWATDVAK_	Q9NYL2-2
SEGFSMDR_	Q7Z4V5
SEGQGIWALLGR_	O94880
SEMPPVQFK_	P52306
SEQEDEVLLVSSSR_	Q9NZJ9-2
SESEVEEAAAIIAQRPDNPR_	Q16643-3
SESPCESPYPNEK_1xCarbamidomethyl [C5]	Q8NI27
SFDLLILK_	Q8NI27
SFEDPPNHAR_	P26358-2
SFLDELK_	Q86XI2
SFLEDTTPAR_	Q3YEC7
SFQPLGPGYGISQSSR_	O75122-3
SFQQSSLSR_	P43243
SFTPVFLGSALK_	Q96RP9
SFVPEEEKHEER_	O94880
SGASAAPAASAAAALAPSATR_	Q7Z7K6-3
SGASGASAAPAASAAAALAPSATR_	Q7Z7K6
SGGATIEELTEK_	P18583-9
SGGCGAGAGVGGGNGALTWVNNAAK_1xCarbamidomethyl [C4]	Q02880-2
SGLKHEDKR_	Q8NC51-2
SGLLLCPPR_1xCarbamidomethyl [C6]	Q9HB58-7
SGNFSAAMK_	P18583-5
SGPHCSESIHR_1xCarbamidomethyl [C5]	P42785
SGQQIVGPPR_	Q9UNZ2-5
SGRPEELVSCADCGR_2xCarbamidomethyl [C10; C13]	Q92784
SGSQIVR_	Q96RP9-2
SGYGFNEPEQSR_	Q5BKZ1
SHATTEPEQTEPEQR_	P78559
SHDDGNIDLESDSFLK_	P18583-9
SHDSSTYR_	Q8NI27
SHFDGVR_	Q13033-2
SHFVAASLSNQK_	Q86XP3
SHLVHGSSPGVMGTSVATSASK_	P35658
SHLVHGSSPGVMGTSVATSASK_1xOxidation [M12]	P35658
SHREEMEVR_	Q13951
SHTGERPFQCNQCGASFTQK_2xCarbamidomethyl [C10; C13]	Q13422
SHVYSLEGQDCK_1xCarbamidomethyl [C11]	Q9NXE4-2
SIASHVRPDR_	Q86XP3
SIDMSWDSVTMK_	Q9UHX1-2
SIDMSWDSVTMK_1xOxidation [M11]	Q9UHX1-2
SIDMSWDSVTMK_2xOxidation [M4; M11]	Q9UHX1
SIRPGLSPYR_	Q14697-2
SISITSALLTEK_	P30622-2
SIVEGIIEEEEEDEEGSESISK_	Q9Y570
SIVEGIIEEEEEDEEGSESISKR_	Q9Y570
SIVSESDVSSFEIQHSGFVK_	Q14669-2
SLAGSSGPGASSGTSGDHGELVVR_	P29692-2
SLAILSLAENEIR_	Q8IW35-2
SLDQAISR_	Q96F07-2
SLDWQIDVDLLNK_	Q15008
SLEAEILQLQEELASSER_	P35580-3
SLEITGER_	Q5T200
SLELHEEFGYNADTQK_	P53367-2
SLENAIEWSVK_	Q9Y570
SLGIMQTVK_	Q86XI2
SLHSATTIGNK_	P51610-4
SLIGCFNLDPNR_1xCarbamidomethyl [C5]	Q8NI27
SLIPDIKPLAGQEAVVDLHADDSR_	Q9UKV3
SLLLSVNAR_	Q14697-2
SLLNDVQFGQFGDDPK_	O75909-4
SLPNEEIVQK_	P18583-9
SLQPAVAEK_	P35658
SLSQSFENLLDEPAYGLIQK_	Q8TC07-3
SLTSCSSDITLR_1xCarbamidomethyl [C5]	Q8WWI1-3
SLVDIDLSSLR_	O95819-3
SMAQHLIDTNK_	Q96BY6-3
SMDSYLNQSYGMDNHSGGGGGSR_	Q5BKZ1
SMDSYLNQSYGMDNHSGGGGGSR_2xOxidation [M2; M12]	Q5BKZ1
SMGDYAQTLK_	Q96SK2-2
SMMSPMADR_3xOxidation [M2; M3; M6]	P18583-9
SMMSSYER_2xOxidation [M2; M3]	P18583-9
SMSDVSAEDVQNLR_	Q8WWI1-3
SMSGHPEAAQMVR_	Q14008
SNEDSLILEK_	O94880
SNHSAQDSAVENLLLLSK_	Q13422
SNPENNVGLITLANDCEVLTTLTPDTGR_1xCarbamidomethyl [C16]	P55036
SNQTMGWGEK_1xOxidation [M5]	O95819-3
SNYQGLPLPCVK_1xCarbamidomethyl [C10]	Q96SB4
SPAFALK_	Q9ULW0
SPEGQFTQLMTLPK_	Q96BW9-3
SPESLPGPALEDIAIK_	P78559
SPESQVIGENTK_	O95218-2
SPGETSKPR_	Q9UNZ2-4
SPGETSKPRPFAGGGYR_	Q9UNZ2-5
SPGFASPK_	P49790
SPGSTPTTPTSSQAPQK_	P35658-5
SPISVPGGSALISNLGK_	P51610-4
SPNELVDDLFK_	Q9UNZ2-5
SPQPLGGSHR_	O43561
SPSDSSTASTPVAEQIER_	Q16643-3
SPSEAADEEKEPQK_	Q9H6Z4-2
SPSEAADEVCALEEK_1xCarbamidomethyl [C10]	Q9H6Z4
SQACEPSEPEIEIK_1xCarbamidomethyl [C4]	P26358-2
SQAFIEMETR_	P43243
SQAFIEMETR_1xOxidation [M7]	P43243
SQAPCANKDEADLSSK_1xCarbamidomethyl [C5]	Q96SK2-2
SQDQFSDMR_	Q8WWI1-3
SQEIIPFPSTK_	O95551
SQESGYYDR_	P43243
SQESGYYDRMDYEDDRLR_	P43243
SQFFITFR_	Q13356
SQGFPDTYR_	P26358-2
SQGGEPTYNVAVGR_	P35080
SQLDINNK_	O00429
SQQLSALQEENVK_	P30622-2
SQSWEER_	Q6Y7W6-3
SQTIIQSGAVIDCEDK_1xCarbamidomethyl [C13]	O15084-1
SQTLPIIR_	Q96BY6-3
SRPFTVAASFQSTSVK_	Q9UHB6-5
SSAVVVDAIPVFLEK_	Q14669-2
SSDQPLTVPVSPK_	Q9ULW0
SSFLASLNPK_	Q14669-2
SSFNLGTIETK_	P49790
SSGSPYGGGYGSGGGSGGYGSR_	P51991
SSHETLNIVEEK_	O43491-4
SSLDGPIVLAIEDFHK_	Q96F07
SSLLAVSNK_	P35658
SSPTVYNSPTDKEDYMTDLR_	Q96SK2-2
SSQGSSSSTQSAPSETASASK_	Q9ULU4-10
SSQPQAGSQGPQTFR_	Q13356-2
SSTHGEAAAETDSRPADEDMWDETELGLYK_	Q96T88
SSVLESLVGR_	O00429
SSVLPSPSGR_	P35658
STAPASLSR_	P35658
STFSFSMTKPSEK_	P49790
STNVTVAAAR_	Q5BKZ1
STPGLRPQHLSGLEMIR_	O00442
STRPQAWVPR_	O94880
STSTPTSPGPR_	Q8WWM7
STTPPPAEPVSLPQEPPKPR_	Q9UN86-2
STTSQVTPAEEK_	P78559
SVAQQASLTEQR_	P52306
SVASGGWQEPENPHTQR_	Q9UJW0
SVAVYGGGSMWEQAK_	Q86XP3
SVESTSPEPSK_	P18583-9
SVIEPLPVTPTR_	Q13153
SVLLPTHR_	Q6P6C2-1
SVMTEEYK_	Q96AE4-2
SVMTEEYK_1xOxidation [M3]	Q96AE4-2
SVNLLVVK_	Q14008
SVQAGNPGGPGPGGR_	Q96AE4-2
SVTDSIRDEYAFLQK_	O00429
SVYFKPSLTPSGEFR_	P49790
SVYHLEDIVR_	Q14669-2
SWASPVYTEADGTFSR_	Q8WWI1-3
SWDAINR_	P42785
SWHPEEFNCAHCK_2xCarbamidomethyl [C9; C12]	Q96HC4-6
SYDYDLIIIGGGSGGLAAAK_	Q16881-5
SYEIASLVR_	Q9NXE4-2
SYESSEDCSEAAGSPAR_1xCarbamidomethyl [C8]	Q6P6C2
SYFLIVR_	O00429
SYIFEGALGMSNR_	Q3ZAQ7
SYLQDPIWR_	Q96F07-2
SYMIPENEFHHK_	Q8NI27
SYMIPENEFHHKDPPPR_	Q8NI27
SYQDPSNAQFLESIR_	Q9UNZ2-5
SYSFHQSQHR_	Q8NEY8-2
SYTPLHAAASSGMISVVK_	O15084
TAASGAAGDKDTK_	Q14008
TADDSATSDYCPAPK_1xCarbamidomethyl [C11]	Q9UBC3
TAIPFTQEPQR_	Q96F07-2
TALAATNPAVR_	Q14008
TALAMGADR_	P38117
TALHVAAAEGHVEVVK_	O94925
TASDMVSTSR_	O00232
TASDMVSTSR_1xOxidation [M5]	O00232
TAVNVPR_	Q96HC4
TCEESSFCK_2xCarbamidomethyl [C2; C8]	Q14697-2
TCVQEITAHR_1xCarbamidomethyl [C2]	Q13033
TDAAVEMK_1xOxidation [M7]	Q16643-3
TDFEMHHNINR_	Q96BY6-3
TDGFDEFK_	P29590
TDSDEEVAMLLDTVQK_	Q86XI2
TDSEIALLEGLTVVYK_	P61923
TDWHMAFTGMSR_	Q96M27
TEDDFNDWCQQVK_1xCarbamidomethyl [C9]	Q9Y4P1-2
TEEASSGFLPGDR_	Q8WWI1-3
TEEGPTLSYGR_	P43243
TEILSLEK_	Q9GZT8-3
TEILSLEKPLLLHTGMGR_	Q9GZT8
TEISDKITSELVSK_	Q14008
TEMPCQALVR_1xCarbamidomethyl [C5]	Q14008
TENLVDSSVTFK_	P51809
TEQEVVEGMDISTR_	Q9ULU4-12
TEQGEEEEEEEDEEEEEK_	P98175-5
TESDDLHTFLLEIK_	P35658
TESLEAGDDESK_	Q5T200-2
TFDETVSTYVPLAQQVEDFHKR_	Q9ULW0
TFHIFYQLLSGAGEHLK_	P35580-3
TFPYQHR_	Q8NI27
TFVPQFQEAAFANGK_	Q9NXR7
TGAPAQADSR_	P20290
TGAPQYGSYGTAPVNLNIK_	Q6UN15
TGDTGMLPANYVEAI_	Q14847
TGLLTETSSR_	P30622-2
TGNCLYGNTCR_2xCarbamidomethyl [C4; C10]	Q5T200
TGPFAEHSNQLWNISAVPSWSK_	Q15257
TGPVTLHTQTAIHFAEQIAK_	O00442
TGQAAELGGLLK_	O00231-2
TGVVTDGVK_	P38117-2
TIAPALVSK_	P06733
TIAPALVSKK_	P06733
TICDWEGGR_1xCarbamidomethyl [C3]	Q96F07-2
TIEDTLMTVK_	P53367-2
TILDANEEFK_	Q12981-1
TILTTSHLFPYVK_	Q96BY6-3
TINVEFAK_	P98175-5
TISQTSAPVWDESASFLIR_	Q9BSJ8-2
TIVQSGGIK_	P52306
TKHEEILQNLQK_	P30622-2
TLAVITK_	O00429
TLDTFLR_	Q96SK2-2
TLFANTGGTVK_	Q9UKA9-4
TLLVNCQNK_1xCarbamidomethyl [C6]	Q8TC07
TLPQEPGKPQK_	P78559-2
TLPSMVHR_	Q8N6T3
TLSPEFNER_	Q9BSJ8
TLTELILDAQEHVK_	P17480
TLYSTVPEDAEHK_	Q96BY6-3
TNDQDGLISGILR_	Q8TC07
TNFDTETR_	Q8IW35
TPAEVVSTCDITFACVSDPK_2xCarbamidomethyl [C9; C15]	Q49A26
TPATTPEAR_	Q8NI27
TPESEEENVEWETNR_	Q5T200-2
TPGQINLAQLR_	Q9UPN9-2
TPHPVLTPVAANQAK_	P35658
TPLDLAAFK_	O15084-1
TPLHNDNSWIR_	Q8WWI1-3
TPNFSTLLCYDR_1xCarbamidomethyl [C9]	Q8NI27
TPNNVVSTPAPSPDASQLASSLSSQK_	Q8WWI1-3
TPPEDCEGPFRPAEILK_1xCarbamidomethyl [C6]	P49790
TPSIQPSLLPHAAPFAK_	P35658
TPTAVVAPVEK_	P30622-2
TPTLTSIYCR_1xCarbamidomethyl [C9]	P29590
TPTSSGKPSAK_	Q02880
TPVSGSLK_	Q8NI27
TQDQISNIKYHEEFEK_	Q14847
TQLIQLSTLLR_	Q8TC07
TSCKDDEAVVQAPR_1xCarbamidomethyl [C3]	P35658-5
TSFDQDSDVDIFPSDFPTEPPSLPR_	Q02880-2
TSFFLGEVGNAAK_	Q49A26
TSMFPSLK_	Q15813-2
TSQSWVER_	Q9H6Z4
TSSSDTLSEEK_	Q9BXW9
TTANAIYCPPK_1xCarbamidomethyl [C8]	O00231-2
TTESHMDWEK_1xOxidation [M6]	P17480
TTHLIAK_	O00232
TTLLEGFAGVEEAR_	P35658
TVALGHR_	Q15008-4
TVDALTGWVGSSNYR_	O75122-3
TVEICPFSFDSR_1xCarbamidomethyl [C5]	Q9ULW0
TVEICPFSFDSRDKER_1xCarbamidomethyl [C5]	Q9ULW0
TVMLIPGDK_	Q9P287
TVSFEALPIMR_	O15084
TVSLGAGAK_	P06748
TVSLGAGAKDELHIVEAEAMNYEGSPIK_1xOxidation [M20]	P06748
TWLESMAK_	Q96BY6-3
TWTQVYK_	Q02880
TYEAALETIQNMSK_	O00231-2
TYEEGLKHEANNPQLK_	P31948
TYEEGLKHEANNPQLKEGLQNMEAR_	P31948
TYHALSNLPK_	O00231-2
TYVDLTNEETTDSTTSK_	O95551
TYVPALEQSADGHK_	P98175-5
VAELEEEQSQGSSSYSDWVK_	P78559
VAFVDMLLK_	Q86XI2
VAHLALK_	P55036
VAIFTLINEINK_	Q9UPN9
VAIFTLINEINKK_	Q9UPN9-2
VANIIAEVAK_	P52306
VAPQNDSFGTQLPPMHQQQR_	Q96AE4-2
VAPQNDSFGTQLPPMHQQQSR_	Q96AE4
VAPSAVLGPNVSIGK_	Q96IJ6
VAQTEFDR_	Q9NR46-2
VARPLPAEEPER_	P26358-2
VASGGGGVGDGVQEPTTGNWR_	O00429-2
VASSPVMVSNPATR_	P51610-4
VASSPVMVSNPATR_1xOxidation [M7]	P51610-4
VCACHLCGGR_3xCarbamidomethyl [C2; C4; C7]	Q96T88
VDDDLGTIESLEEAK_	P35580-4
VDHFGFNTVK_	P42785
VDKIEELDQENEAALENGIK_	P43243
VDNDENEHQLSLR_	P06748
VDSDKEDDITELK_	P52306
VDSLLENLEK_	P07910-2
VDSLLENLEKIEKEQSK_	P07910-2
VEETVKHDWDR_	Q16881-5
VEFILEQMR_	O00232
VEGELEEMER_	P35580-3
VEGELEEMER_1xOxidation [M8]	P35580-4
VEKPPDNQK_	Q8NI27
VELGEKPLR_	Q9BSJ8
VENEDEPVR_	Q9UBF8-2
VEPLEEAIPLPPTK_	O15446
VEPYSLTAQQSSLIR_	Q96T88
VETPHVTIEDAQHR_	Q5T200
VETQSDEENGR_	Q13422
VEVDGSIMEGGGQILR_	O00442
VEVWDVVDK_	Q3YEC7
VFIGNLNTLVVK_	P07910-2
VFIGNLNTLVVKK_	P07910-2
VFLISASSK_	Q9H6Z4
VFLQNLLSVSQAR_	P16930
VFSDIIYTVASCTENEASR_1xCarbamidomethyl [C12]	Q8NI27
VGASYEWQSR_	Q9HB58-7
VGAVDADK_	Q15084-5
VGAVDADKHHSLGGQYGVQGFPTIK_	Q15084-5
VGIEAAEMLLANLR_	O00442
VGIEAAEMLLANLR_1xOxidation [M8]	O00442-2
VGLDATNCLR_1xCarbamidomethyl [C8]	Q9NXR7
VGNQIFQSR_	A0FGR8-2
VGQADDSTKPTNK_	P35658
VGRPSNIGQAQPIIDQLAEEAR_	Q9UHX1-2
VGVLAASMEAK_	Q9UHB6-5
VHEELR_	Q14697-2
VIAQLEIR_	Q9UPN3
VIDNFTSQLK_	P30622-2
VIDYAVK_	P38117
VIEPFSR_	O00231-2
VIGVLEPLDPEDYTK_	Q96RP9
VIHLSNLPHSGYSDSAVLK_	P43243
VIIYQEK_	Q9UHX1-2
VIQYLAHVASSHK_	P35580-3
VLDENLADPQAEDRPLVFFDLK_	P29590
VLEQLEDLDSR_	P26358-2
VLGLGLGCLR_1xCarbamidomethyl [C8]	Q9BRJ7-2
VLHPEQHR_	P26358-2
VLLVLELQGLQK_	Q14697-2
VLNLGQALER_	Q8NI27
VLNTGSDVEEAVADALK_	O75122
VLPITVPK_	Q9ULW0
VLQASVLDDWFPLQGGQGQVHLR_	Q9BSJ8
VLSSCPQAGEATLLAPSTEAGGGLTCASAPQGTLR_2xCarbamidomethyl [C5; C26]	O15446-2
VLTDIVAK_	Q96BY6-3
VLVALASEELAK_	A0FGR8-2
VLVFVMGK_	P35080
VLVLNQTGITWAEVLR_	Q15813
VLYSNMLGEENTYLWR_	Q00325-2
VLYSNMLGEENTYLWR_1xOxidation [M6]	Q00325-2
VLYYSATK_	P26358-2
VMETQAQVDELK_	P51809
VMETQAQVDELK_1xOxidation [M2]	P51809-2
VMHQIISK_	Q92619-2
VMMAELEK_	Q9BXW9-1
VMTSGTGAPAK_1xOxidation [M2]	P51610-4
VMVLDFVTPTPLGTR_	Q16881-5
VNCLDKFWHK_1xCarbamidomethyl [C3]	Q14847
VNEYVDAR_	Q96T88
VNLTLGSIWDK_	Q14697-2
VNPQISDEKDEDEKEEK_	P26358-2
VNVDIINFGEEEVNTEK_	P55036
VPDVLVADPPIAR_	Q14697-2
VPGLQNEQK_	Q8WWM7-3
VPLSQLLTSEDMTVSQR_1xOxidation [M12]	A0FGR8-2
VPLYTQK_	Q9BRJ7
VPPPPPIAR_	P07910-2
VPTHVPVCVLGNYR_1xCarbamidomethyl [C8]	Q3YEC7
VPTLAVPAISLPDDVR_	P26358-2
VQASLAANTFTITGHAETK_	P20290
VQENSPGHR_	Q9H8Y8
VQMTSPSSTGSPMFK_	P49790
VQSNTTSELSR_	Q14669-3
VQVSESGVHRPHVAGIHGR_	Q96T88
VRPDEIMR_	P17480-2
VSDGDWICPDKK_1xCarbamidomethyl [C8]	O95218-2
VSDVEELTPPEHLSDLPPFSR_	Q86XI2
VSEAIEK_	Q15257-2
VSFELFADK_	P62937
VSFELFADKVPK_	P62937
VSMEEQR_	P55036
VSMHYSDPKPK_	P98175-5
VSMVGQVK_	Q9Y570
VSMVGQVK_1xOxidation [M3]	Q9Y570-4
VSPESNEDISTTVVYR_	O94925-3
VSQGSKDPAEGDGAQPEETPR_	Q14697
VSQLLAVTGK_	Q13951
VSSDNVADLHEK_	P28074
VTATDLDEPDTLHTR_	Q08554
VTEGGEPYR_	Q14697-2
VTEGLVDVILYHQPDDK_	O43390
VTEGLVDVILYHQPDDKK_	O43390
VTEGLVDVILYHQPDDKKK_	O43390
VTETEDDSDSDSDDDEDDVHVTIGDIK_	Q6UN15
VTGLTEGLVDVILYHQPDDK_	O43390-2
VTLATLK_	P06748
VTNYIFDSLR_	Q8TC07
VVALAEGR_	Q8N6T3
VVAQSTNSEEIIEGEYNTVMLAIGR_	Q16881-5
VVEHNIR_	O00232
VVGERPFQCNQCGASFTQK_2xCarbamidomethyl [C9; C12]	Q13422-2
VVGFHVLGPNAGEVTQGFAAALK_	Q16881-5
VVHIMDFQR_	P43243
VVHIMDFQR_1xOxidation [M5]	P43243
VVITVQQLSNK_	Q5R372-3
VVMEFLHECMVNK_1xCarbamidomethyl [C9]	Q5BKZ1
VVMEFLHECMVNK_1xCarbamidomethyl [C9]; 1xOxidation [M10]	Q5BKZ1
VVMEFLHECMVNK_1xCarbamidomethyl [C9]; 2xOxidation [M3; M10]	Q5BKZ1
VVSSVLQFGNISFK_	P35580-3
VVSTSGEQMK_1xOxidation [M9]	Q13422
VVYENAYGQFIGPHR_	Q16881-5
VWLPTAGFDHHVVR_	Q9UBF8
VYQGLYCVAIR_1xCarbamidomethyl [C7]	Q15008-4
VYTENVDK_	A0FGR8-2
VYVPALIFGQLLTSSNYDDDEKK_	Q02880-2
WDGNEMAK_	Q9NXR7
WFTLSSGQGQVLLR_	Q9BSJ8
WGTLTDCVVMR_1xCarbamidomethyl [C7]	P51991
WGTLTDCVVMR_1xCarbamidomethyl [C7]; 1xOxidation [M10]	P51991
WIDATSGIYNSEK_	Q8WWI1-3
WLQDEMFHSDFQHHNK_	Q14008
WMEANQHSLNILGQK_	P98175-5
WNFTTPR_	Q14008
WNWLTR_	Q86XP3
WQPTASEPVK_	Q49A26
WSFDDVPMTPLR_	Q9P287
WSLNTYK_	P53367-2
WSQEDMLTLLECMK_1xCarbamidomethyl [C12]	P17480
WSQEDMLTLLECMK_1xCarbamidomethyl [C12]; 2xOxidation [M6; M13]	P17480
WSTLVEDYGMELR_	O00232
WSTLVEDYGMELR_1xOxidation [M10]	O00232
WTDGLLYLGTIK_	O43189
WVASSTAEK_	Q9NV70-2
WVEISNEVR_	P17480
WVWDQEEER_	Q8WWI1-3
WYDLMDNK_	Q9BSJ8
WYQMGAYQPFFR_1xOxidation [M4]	Q14697-2
YAGPEDDAAITLAFSK_	Q02880
YAMEQSIK_1xOxidation [M3]	Q9UHX1
YAPAEGNR_	Q96T88
YATLPNIMK_	P38117
YAVLYQPLFDK_	P55209
YAVLYQPLFDKR_	P55209
YDDYPENGVVQMNSR_	Q96T88
YDIPATAATATSPTPNPVPSVPANPPK_	P51610-4
YDNLITPVVDSLK_	Q8NI27
YELIADVNKPIIAVFEK_	Q96BY6
YEQYSGDIR_	Q96BY6-3
YFFGEGYTYGAQLQK_	Q6P6C2-1
YFGDTDMYHR_	Q9NXW2
YFSSENMDGSNPALNVLQR_1xOxidation [M7]	Q14669-2
YFWGNLPGMNR_	Q9UBC3-3
YGAPEDWELK_	Q15813-2
YGEIPAELR_	Q96RP9
YGGISTASVDFEQPTR_	P98175-5
YGLFAPVHK_	P30622-2
YGQHPPDAVDEPQMLTNEK_	P26358-2
YGQHPPDAVDEPQMLTNEK_1xOxidation [M14]	P26358-2
YGTELNQGDLK_	Q13033-2
YHTINGHNCEVK_1xCarbamidomethyl [C9]	P51991
YIETSELCGGAR_1xCarbamidomethyl [C8]	O00429
YIFTMLSTLAR_	Q02880
YIQDFQR_	P17480
YITSCEMVMAPVHEAVVSLHVSK_1xCarbamidomethyl [C5]	Q8NI27
YKDAIHFYNK_	P31948
YKEEFEK_	Q14847
YLEATGQLPVK_	Q96RP9
YLFVDR_	P35580-3
YLGIPGDK_	Q16881-5
YLGPACDLTLFDFK_1xCarbamidomethyl [C6]	Q9UIS9-9
YLTMDDLTTALEGNR_	P54687-5
YNLDASEEEDSNKK_	O95218
YNLYTAEGK_	Q8N9N2-2
YNVPLNR_	Q9UHB6-5
YNYLASR_	P18583-3
YQADITDLLK_	Q13330-3
YQDTHPER_	Q96IJ6
YSIFTEKDEILSDVASR_	Q9Y4P1
YSNDLYELQASR_	P51610-4
YVGFGNTPPPQK_	Q8N6T3
YVLEDGPEEDR_	Q15813-2
YVLINWVGEDVPDAR_	Q16643-3
YVRPFLNSISK_	O00231-2
YVVLCESPQDK_1xCarbamidomethyl [C5]	Q8TC07
YWALGQK_	P78559-2
YWDGWFR_	Q9Y570
YYGESLPFGDNSFK_	P42785

## Sheet: Shared peptide ID analysis
	Reference database (DB)	# unique high confidence peptides	Found in SP	Found in MAJIQ	Found in RefSeq	Not found in other databases	% of SP peptide IDs	% of MAJIQ peptide IDs	% of RefSeq peptide IDs
	SwissProt	3089	3089	211	1204	1770	100	97.4249	98.9316	in SwissProt
	MAJIQ	233	227	233	102	5	6.83069	100	14.2094	in MAJIQ
	RefSeq	936	926	133	936	8	38.977	43.7768	100	in RefSeq
